# Supplementary material
Source: MDPI journal article supplement (https://www.mdpi.com/1996-1073/12/8/1513)
Supplement: s1 [file s1]

Archive with 5 entries (5 files):
- Figure(S1)_NUTs2.pdf
- Figure(S2)_NUTs3.pdf
- Table (S2)_NUTs2_EU28Values.xls
- Table(S1)_NUTs0_EU28Values.xlsx
- Table(S3)_NUTs3_EU28Values.xls
