# Supplementary material
Source: MDPI journal article supplement (https://www.mdpi.com/1996-1073/12/8/1513)

**Figure S1.** Regional theoretical pruning potential by NUTs2 in EU28

# FRUIT

EU28 Pruning potential by NUTs2

Legend

FRUIT PRUNING POTENTIAL (tDM·yr<sup>-1</sup>)

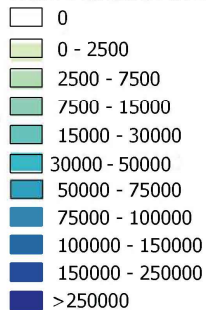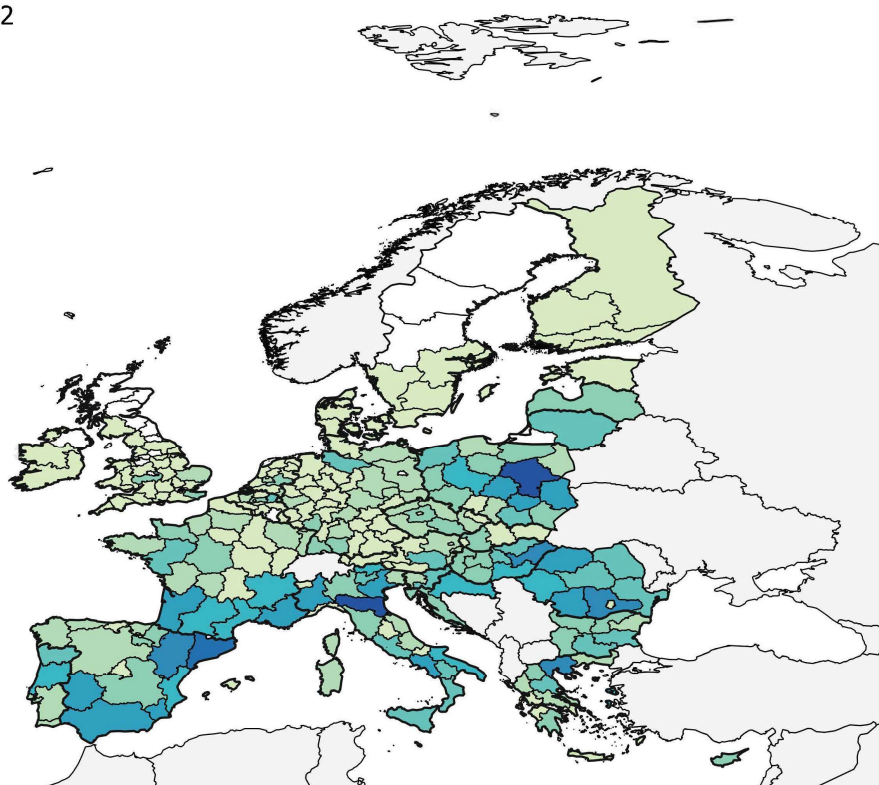

# NUTS

EU28 Pruning potential by NUTs2

Legend

NUTS / DRY FRUITS POTENTIAL (tDM·yr<sup>-1</sup>)

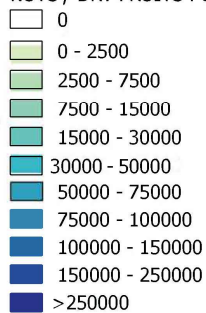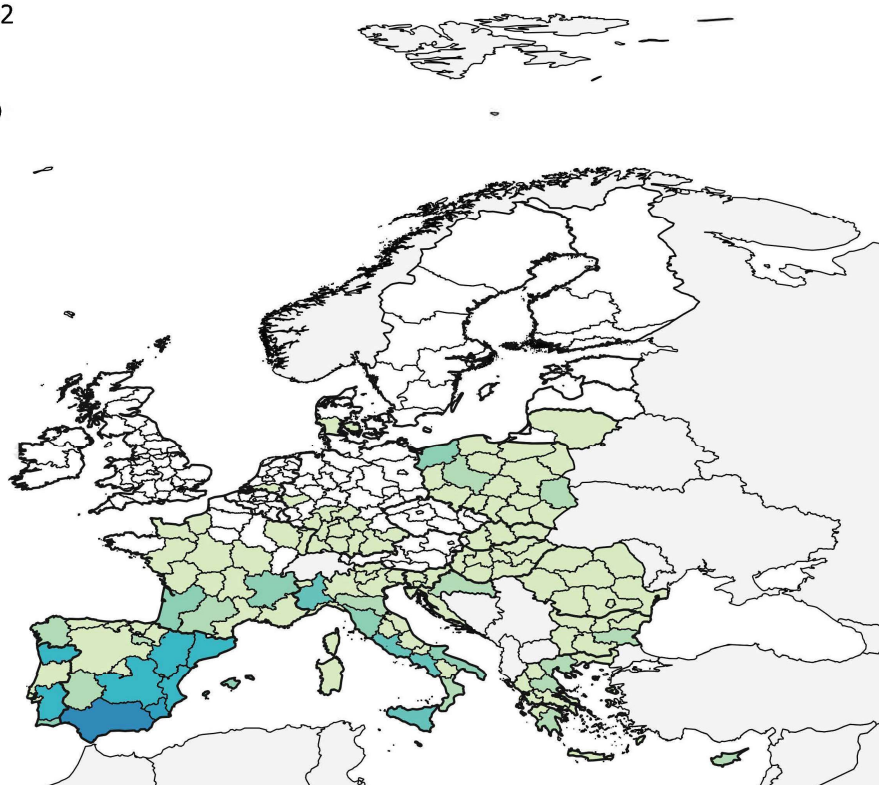

## CITRUS

EU28 Pruning potential by NUTs2

Legend

CITRUS PRUNING POTENTIAL (tDM·yr<sup>-1</sup>)

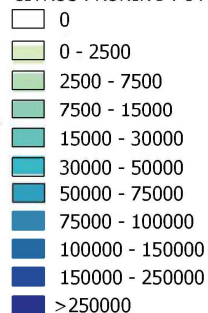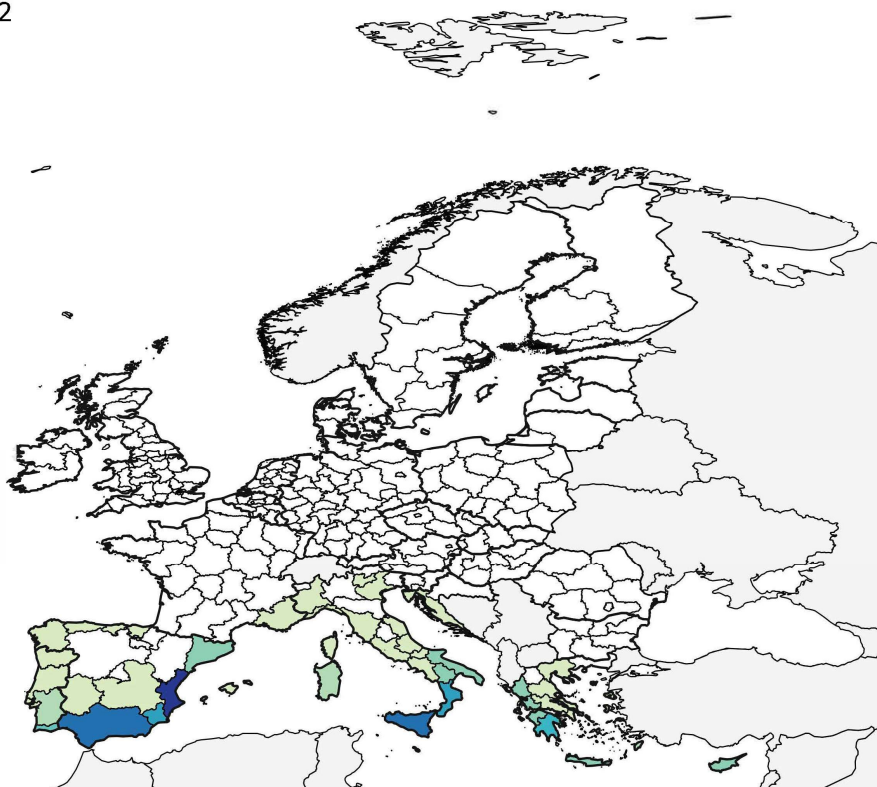

## OLIVE

EU28 Pruning potential by NUTs2

Legend

OLIVE PRUNING POTENTIAL (tDM·yr<sup>-1</sup>)

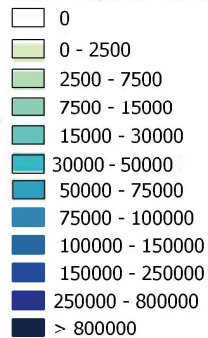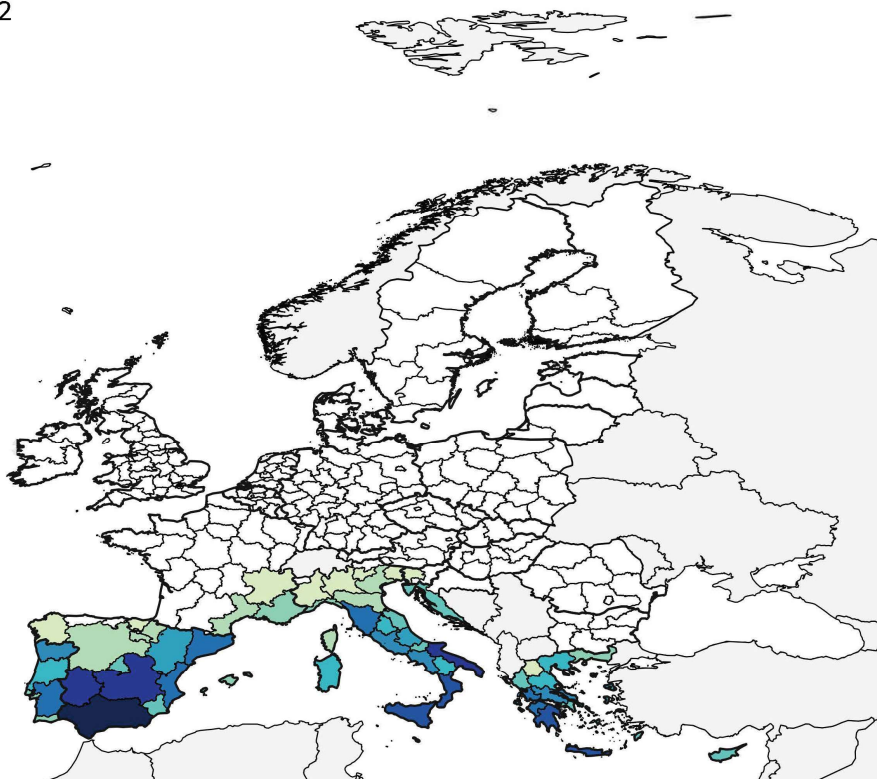

## VINEYARD

EU28 Pruning potential by NUTs2

Legend

VINEYARD PRUNING POTENTIAL (tDM·yr<sup>-1</sup>)

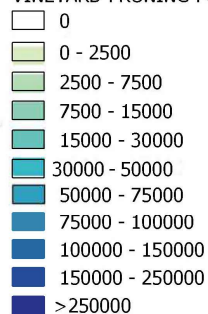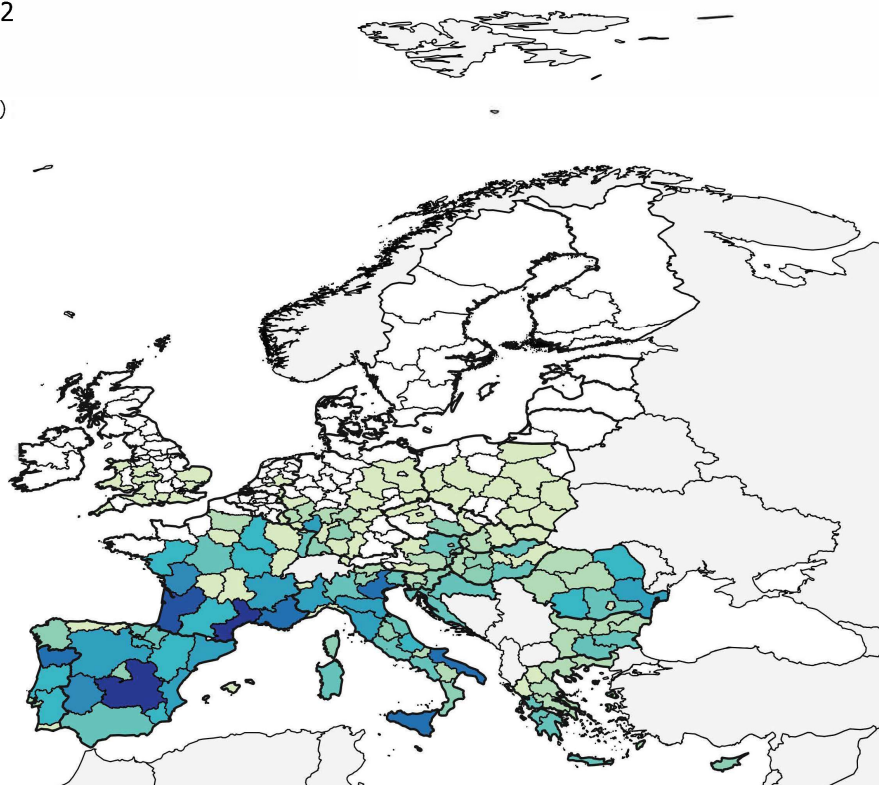

## TOTAL (ALL SPECIES)

EU28 Pruning potential by NUTs2

Legend

TOTAL PRUNING POTENTIAL (tDM·yr<sup>-1</sup>)

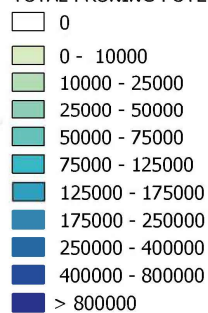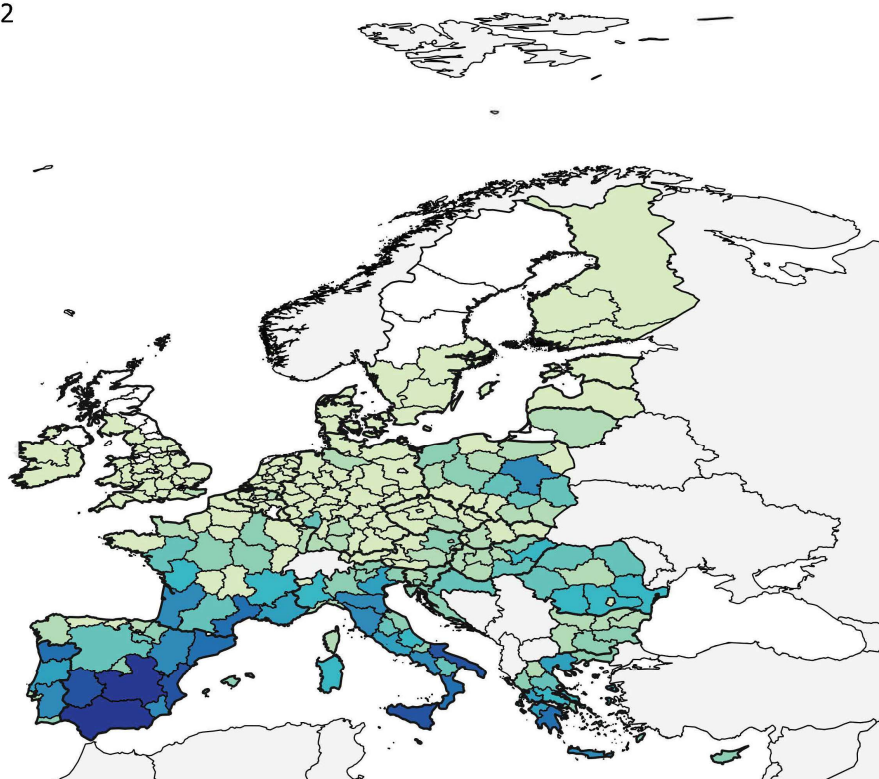

Supplement: s1 [file s1 › Figure(S1)_NUTs2.pdf]
