# Supplementary material
Source: MDPI journal article supplement (https://www.mdpi.com/1996-1073/12/8/1513)

**Figure S2.** Regional theoretical pruning potential by NUTs3 in EU28

### FRUIT

EU28 Pruning potential by NUTs3

Legend

FRUIT PRUNING POTENTIAL (tDM·yr<sup>-1</sup>)

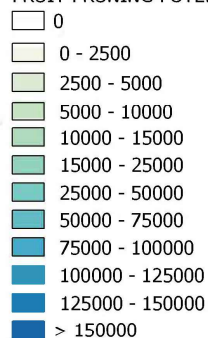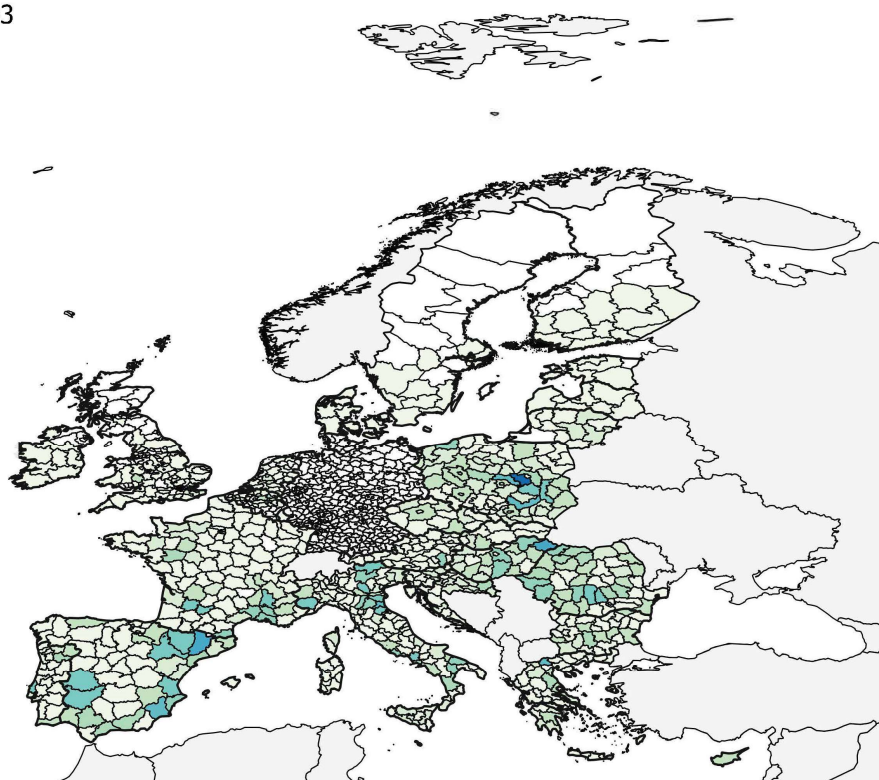

### NUTS

EU28 Pruning potential by NUTs3

Legend

NUTS / DRY FRUIT POTENTIAL (tDM·yr<sup>-1</sup>)

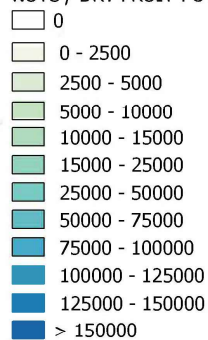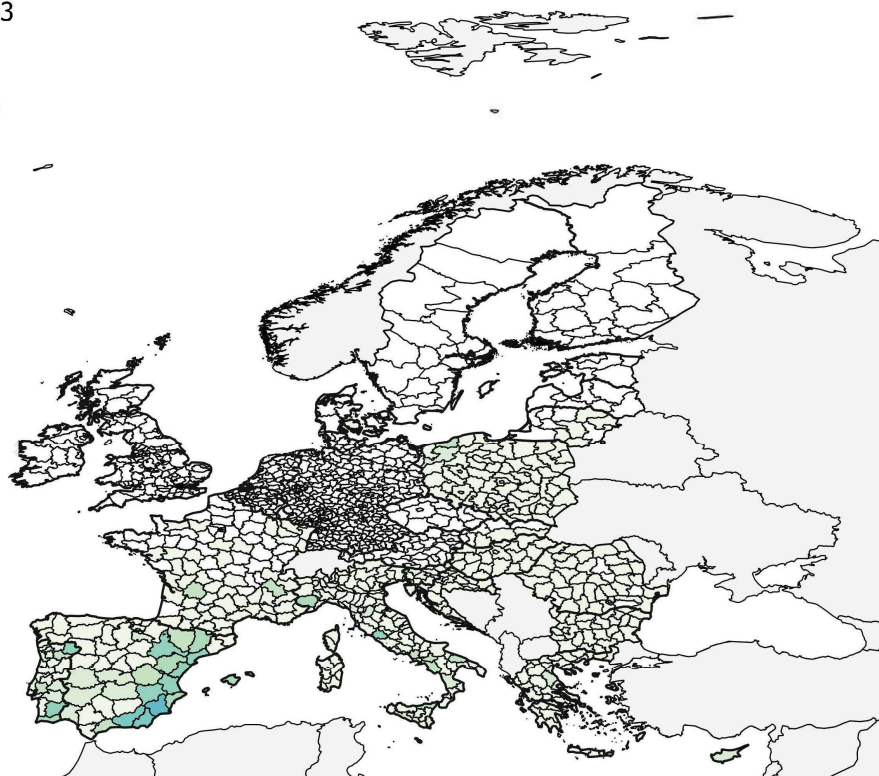

## CITRUS

EU28 Pruning potential by NUTs3

Legend

CITRUS PRUNING POTENTIAL (tDM·yr<sup>-1</sup>)

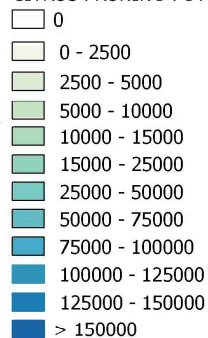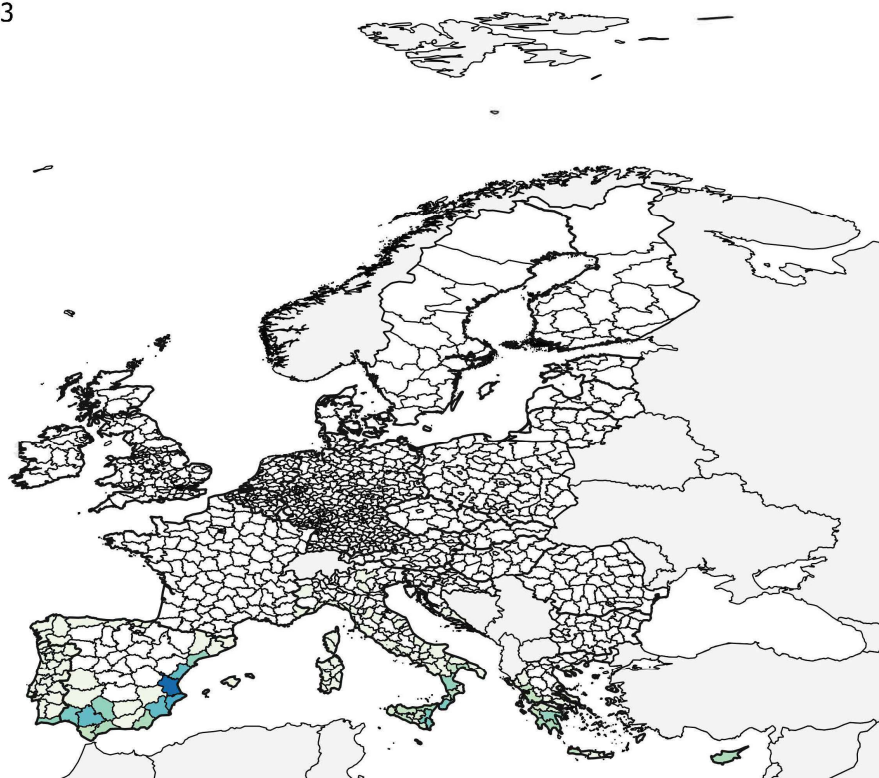

## OLIVE

EU28 Pruning potential by NUTs3

Legend

OLIVE PRUNING POTENTIAL (tDM·yr<sup>-1</sup>)

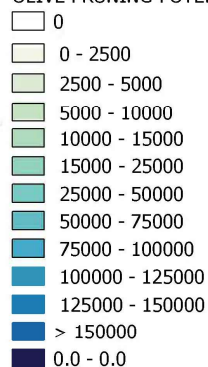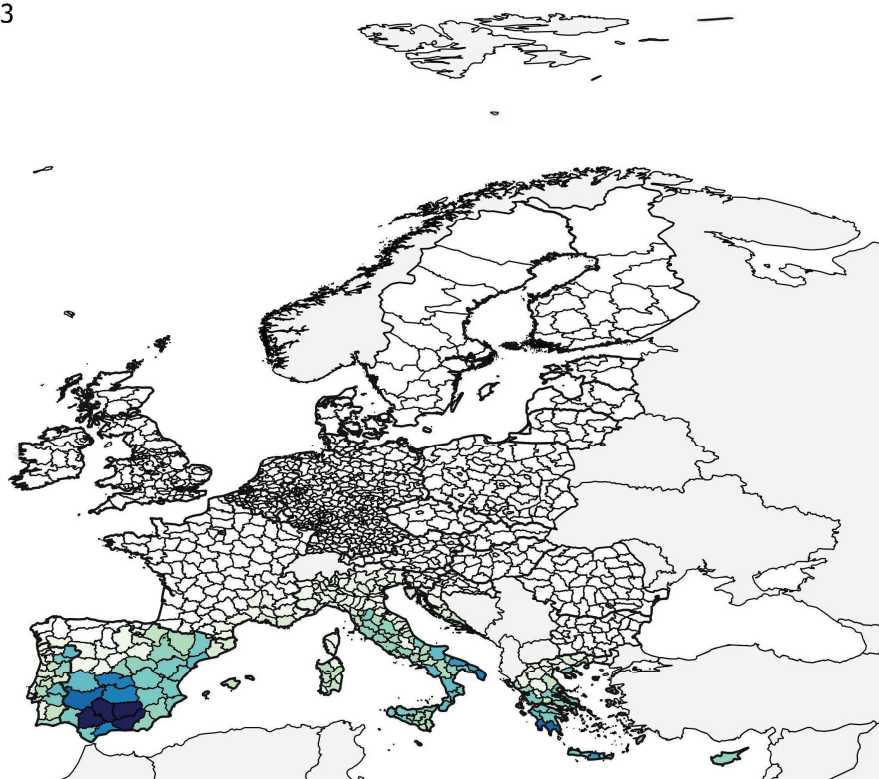

## VINEYARD

EU28 Pruning potential by NUTS3

Legend

VINEYARD PRUNING POTENTIAL (tDM·yr<sup>-1</sup>)

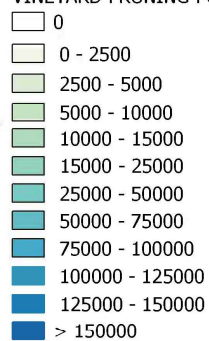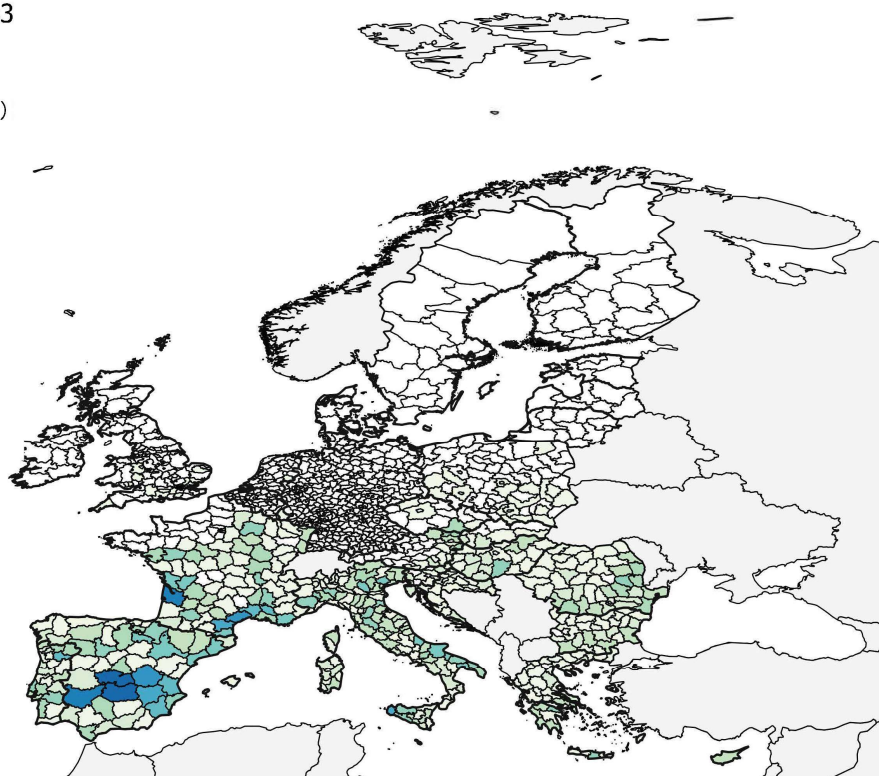

## TOTAL (ALL SPECIES)

EU28 Pruning potential by NUTS3

Legend

TOTAL PRUNING POTENTIAL (tDM·yr<sup>-1</sup>)

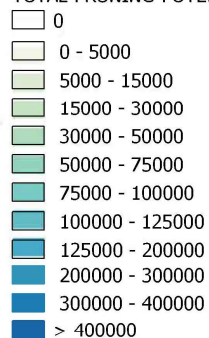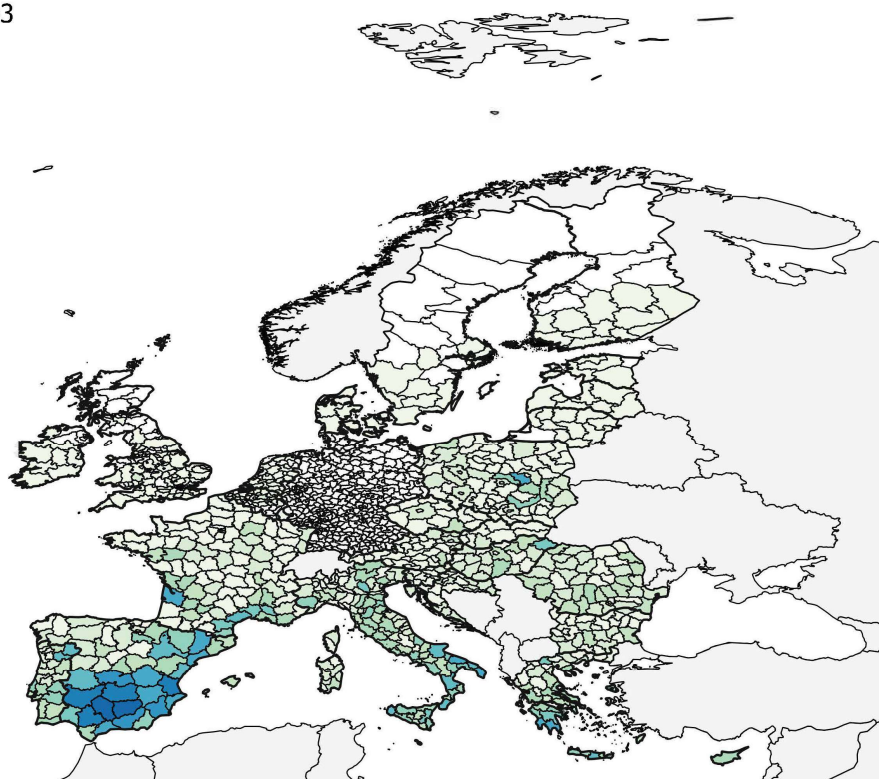

Supplement: s1 [file s1 › Figure(S2)_NUTs3.pdf]
