# Supplementary material
Source: MDPI journal article supplement (https://www.mdpi.com/1996-1073/12/8/1513)
Supplement: s1 [file s1 › Table (S2)_NUTs2_EU28Values.xls]

## Sheet: Fruit
FRUIT			CRT_SLOPE	CRT_LOSS	CRE_WASTE	CRE_SELF	CRE_>2ha	CRE_COM-S	CRE_>2ha	CRE_COM-M	CRE_>2ha	CRE_COM-L	CRI_COMP	CRI_>0ha	CRI_>2ha	CRI_>5ha		BioTH	BioT	BioE_WASTE	BioE_SELF	BioE_COM-S	BioE_COM-M	BioE_COM-L	BioI_WASTE	BioI_SELF	BioI_COM-S	BioI_COM-M	BioI_COM-L		BioT	CRE_COM			Best economic case	CR BEST Economic	BioE_COM_BEST	GAP = BioT - BioE_COM_BEST
Country	NUTs2	NAME	(%)	(%)	(%)	(%)	(%)	(%)	(%)	(%)	(%)	(%)	(%)	(%)	(%)	(%)		t DM·yr-1	t DM·yr-1	t DM·yr-1	t DM·yr-1	t DM·yr-1	t DM·yr-1	t DM·yr-1	t DM·yr-1	t DM·yr-1	t DM·yr-1	t DM·yr-1	t DM·yr-1		(DM t)	S	M	L		(%)	(DM t)	(DM t)	(%)
AT	AT11	Burgenland (A)	0	9	0	8.82353	8.82353	30.5769	8.82353	72.6573	8.82353	78.8112	0	20.5882	21.5054	22.2222		2760	2511.6	2511.6	2289.99	1589.78	626.145	485.222	1994.51	1797.52	1247.89	491.49	380.873		2511.6	30.5769	72.6573	78.8112	BioE_COM-S	30.5769	1589.78	921.821	36.7025
AT	AT12	Nieder÷sterreich	0.0217628	9	0	6.88073	6.88073	32.4592	6.88073	73.7106	6.88073	74.3308	0	26.1468	27.5862	28.2609		4793.79	4361.4	4361.4	4061.31	2743.04	1067.69	1042.5	3221.04	2940.95	1986.34	773.158	754.917		4361.4	32.4592	73.7106	74.3308	BioE_COM-S	32.4592	2743.04	1618.36	37.1065
AT	AT13	Wien	0	9	0	0	0	100	0	100	0	100	0	0	0	0		267.706	243.613	243.613	243.613	0	0	0	243.613	243.613	0	0	0		243.613	100	100	100		100	0	243.613	100
AT	AT21	Kõrnten	0	9	0	6.25	6.25	100	6.25	100	6.25	100	0	18.75	20	27.2727		278.509	253.443	253.443	237.603	77	77	77	205.922	190.082	61.6	61.6	61.6		253.443	100	100	100	BioE_COM-S & BioE_COM-M & BioE_COM-L	100	77	176.443	69.6184
AT	AT22	Steiermark	0	9	0	2.88154	2.88154	40.3194	2.88154	99.8004	2.88154	100	0	10.032	10.2198	10.2469		17477.2	15904.3	15904.3	15446	9218.26	30.8303	0	14308.8	13867.4	8276.18	27.6795	0		15904.3	40.3194	99.8004	100	BioE_COM-S	40.3194	9218.26	6686.01	42.0391
AT	AT31	Ober÷sterreich	0	9	0	2.73973	2.73973	40.3194	2.73973	99.8004	2.73973	100	0	23.2877	23.9437	24.2424		1376.95	1253.02	1253.02	1218.69	727.322	2.43252	0	961.221	926.892	553.175	1.85008	0		1253.02	40.3194	99.8004	100	BioE_COM-S	40.3194	727.322	525.698	41.9544
AT	AT32	Salzburg	0	9	0	0	0	40.3194	0	99.8004	0	100	0	100	100	100		63.9272	58.1738	58.1738	58.1738	34.7185	0.116115	0	0	0	0	0	0		58.1738	100	100	100	BioE_COM-S	40.3194	34.7185	23.4553	40.3194
AT	AT33	Tirol	0	9	0	21.0526	21.0526	40.3194	21.0526	99.8004	21.0526	100	0	15.7895	20	22.2222		305.98	278.442	278.442	219.823	131.192	0.438768	0	234.478	175.858	104.953	0.351014	0		278.442	40.3194	99.8004	100	BioE_COM-S	40.3194	131.192	147.251	52.8837
AT	AT34	Vorarlberg	0	9	0	16.6667	16.6667	40.3194	16.6667	99.8004	16.6667	100	0	16.6667	20	25		104.231	94.8503	94.8503	79.0419	47.1727	0.157768	0	79.0419	63.2335	37.7382	0.126215	0		94.8503	40.3194	99.8004	100	BioE_COM-S	40.3194	47.1727	47.6776	50.2661
BE	BE10	Region de Bruxelles-Capitalet	0	9	0	0	0	40.3194	0	99.8004	0	100	1	0	0	0		0	0	0	0	0	0	0	0	0	0	0	0		0	100	100	100		0	0	0	0
BE	BE21	Prov. Antwerpen	0	9	0	2.7027	2.7027	100	2.7027	100	2.7027	100	1	0	0	0		742.561	675.73	675.73	657.467	0	0	0	668.973	650.893	0	0	0		675.73	100	100	100		100	0	675.73	100
BE	BE22	Prov. Limburg (B)	0	9	0	0.783875	0.783875	2.92612	0.783875	1.68252	0.783875	0.877835	1	1.00784	1.0158	1.03687		19188.6	17461.6	17461.6	17324.7	16817.8	17033.2	17172.6	17112.8	16977.3	16480.5	16691.6	16828.2		17461.6	2.92612	1.68252	0.877835	BioE_COM-L	0.877835	17172.6	288.959	1.65483
BE	BE23	Prov. Oost-Vlaanderen	0	9	0	0.763359	0.763359	100	0.763359	100	0.763359	100	1	0	0	0		2855.24	2598.27	2598.27	2578.43	0	0	0	2572.28	2552.65	0	0	0		2598.27	100	100	100		100	0	2598.27	100
BE	BE24	Prov. Vlaams-Brabant	0	9	0	0.787402	0.787402	12.2449	0.787402	12.5	0.787402	17.602	1	2.3622	2.38095	2.45232		9052.24	8237.54	8237.54	8172.68	7171.94	7151.09	6734.12	7962.52	7898.31	6931.17	6911.02	6508.05		8237.54	12.2449	12.5	17.602	BioE_COM-S	12.2449	7171.94	1065.6	12.9359
BE	BE25	Prov. West-Vlaanderen	0	9	0	0	0	100	0	100	0	100	1	21.4286	21.4286	22.5		634.564	577.453	577.453	577.453	0	0	0	449.176	449.176	0	0	0		577.453	100	100	100		100	0	577.453	100
BE	BE31	Prov. Brabant Wallon	0	9	0	0	0	100	0	100	0	100	1	0	0	0		340.473	309.83	309.83	309.83	0	0	0	306.732	306.732	0	0	0		309.83	100	100	100		100	0	309.83	100
BE	BE32	Prov. Hainaut	0	9	0	0	0	100	0	100	0	100	1	0	0	0		39.9996	36.3996	36.3996	36.3996	0	0	0	36.0356	36.0356	0	0	0		36.3996	100	100	100		100	0	36.3996	100
BE	BE33	Prov. LiÞge	0	9	0	0	0	58.5366	0	58.5366	0	42.6829	1	0	0	0		1669.77	1519.49	1519.49	1519.49	630.032	630.032	870.927	1504.29	1504.29	623.732	623.732	862.218		1519.49	100	100	100	BioE_COM-L	42.6829	870.927	648.563	42.6829
BE	BE34	Prov. Luxembourg (B)	0	9	0	0	0	58.5366	0	58.5366	0	42.6829	1	0	0	0		0	0	0	0	0	0	0	0	0	0	0	0		0	100	100	100		0	0	0	0
BE	BE35	Prov. Namur	0	9	0	0	0	100	0	100	0	100	1	0	0	0		375.376	341.592	341.592	341.592	0	0	0	338.176	338.176	0	0	0		341.592	100	100	100		100	0	341.592	100
BG	BG31	Severozapaden	0.0997133	9	0	30.5466	30.5466	100	30.5466	100	30.5466	100	7.75	5.46624	7.87037	9.77011		7977.29	7252.09	7252.09	5036.82	0	0	0	6324.36	4280.78	0	0	0		7252.09	100	100	100		100	0	7252.09	100
BG	BG32	Severen tsentralen	0	9	0	14.7627	14.7627	97.6111	14.7627	100	14.7627	100	7.75	11.0721	12.9897	15.75		14641.1	13323.4	13323.4	11356.5	271.295	0	0	10930	9115.55	217.76	0	0		13323.4	97.6111	100	100	BioE_COM-S	97.6111	271.295	13052.1	97.9638
BG	BG33	Severoiztochen	0	9	0	13.6986	13.6986	99.9785	13.6986	100	13.6986	100	7.75	11.6438	13.4921	16.5049		7038.26	6404.81	6404.81	5527.44	1.18589	0	0	5220.47	4411.1	0.946384	0	0		6404.81	99.9785	100	100	BioE_COM-S	99.9785	1.18589	6403.63	99.9815
BG	BG34	Yugoiztochen	0.185447	9	0	18.2116	18.2116	75.0088	18.2116	97.651	18.2116	99.7704	7.75	3.38059	4.13333	5.0571		22784.8	20695.8	20695.8	16926.7	4230.19	397.608	38.8639	18446.4	14969.5	3741.05	351.632	34.3701		20695.8	75.0088	97.651	99.7704	BioE_COM-S	75.0088	4230.19	16465.6	79.5601
BG	BG41	Yugozapaden	0.178663	9	0	47.3904	47.3904	77.5651	47.3904	100	47.3904	100	7.75	1.25261	2.38095	3.65854		10948.7	9945.48	9945.48	5232.28	1173.86	0	0	9059.78	4711.85	1057.1	0	0		9945.48	77.5651	100	100	BioE_COM-S	77.5651	1173.86	8771.62	88.1971
BG	BG42	Yuzhen tsentralen	0.12842	9	0	24.0858	24.0858	68.3493	24.0858	89.5979	24.0858	100	7.75	2.14376	2.82392	3.65591		18385.7	16709.5	16709.5	12684.9	4014.85	1319.49	0	15084	11371.3	3599.11	1182.85	0		16709.5	68.3493	89.5979	100	BioE_COM-S	68.3493	4014.85	12694.6	75.9726
CY	CY00	Kypros/Kibris	0.827433	9	0	58.7393	58.7393	35.4841	58.7393	64.7864	58.7393	57.3156	10	2.00573	3.47222	4.08163		9628.61	8689.53	8689.53	3585.37	2313.13	1262.54	1530.39	7663.72	3114.79	2009.53	1096.83	1329.53		8689.53	35.4841	64.7864	57.3156	BioE_COM-S	35.4841	2313.13	6376.4	73.3803
CZ	CZ01	Praha	0	9	0	0	0	100	0	100	0	100	15	0	0	0		197.673	179.883	179.883	179.883	0	0	0	152.9	152.9	0	0	0		179.883	100	100	100		100	0	179.883	100
CZ	CZ02	Stredni Cechy	0	9	0	0.746269	0.746269	71.5206	0.746269	100	0.746269	100	15	5.72139	5.76441	5.82278		8129.34	7397.7	7397.7	7342.49	2091.1	0	0	5928.28	5881.36	1674.97	0	0		7397.7	71.5206	100	100	BioE_COM-S	71.5206	2091.1	5306.6	71.7332
CZ	CZ03	Jihozapad	0	9	0	1.74419	1.74419	45.0207	1.74419	100	1.74419	100	15	19.7674	20.1183	20.7317		2754.59	2506.68	2506.68	2462.95	1354.11	0	0	1709.49	1672.33	919.435	0	0		2506.68	45.0207	100	100	BioE_COM-S	45.0207	1354.11	1152.56	45.9797
CZ	CZ04	Severozapad	0	9	0	0	0	100	0	100	0	100	15	19.5455	19.5455	20		3914.87	3562.54	3562.54	3562.54	0	0	0	2436.29	2436.29	0	0	0		3562.54	100	100	100		100	0	3562.54	100
CZ	CZ05	Severovychod	0	9	0	1.06952	1.06952	61.7722	1.06952	100	1.06952	100	15	10.1604	10.2703	10.5263		6664.13	6064.36	6064.36	5999.5	2293.48	0	0	4630.96	4575.83	1749.24	0	0		6064.36	61.7722	100	100	BioE_COM-S	61.7722	2293.48	3770.88	62.181
CZ	CZ06	Jihovychod	0	9	0	2.29885	2.29885	92.2699	2.29885	100	2.29885	100	15	26.2069	26.8235	27.3171		8436.17	7676.91	7676.91	7500.43	579.795	0	0	4815.28	4665.27	360.632	0	0		7676.91	92.2699	100	100	BioE_COM-S	92.2699	579.795	7097.12	92.4476
CZ	CZ07	Stredni Morava	0	9	0	1.45455	1.45455	100	1.45455	100	1.45455	100	15	36.3636	36.9004	36.7816		5369.98	4886.68	4886.68	4815.6	0	0	0	2643.25	2582.83	0	0	0		4886.68	100	100	100		100	0	4886.68	100
CZ	CZ08	Moravskoslezsko	0	9	0	2.12766	2.12766	100	2.12766	100	2.12766	100	15	63.8298	65.2174	65.2174		840.631	764.974	764.974	748.698	0	0	0	235.189	221.354	0	0	0		764.974	100	100	100		100	0	764.974	100
DE	DE11	Stuttgart	0	9	0	7.56869	7.56869	70.0523	7.56869	100	7.56869	100	5	9.43494	9.871	10.3839		5443.29	4953.39	4953.39	4578.48	1371.15	0	0	4261.74	3920.21	1174.01	0	0		4953.39	70.0523	100	100	BioE_COM-S	70.0523	1371.15	3582.24	72.319
DE	DE12	Karlsruhe	0	9	0	7.57	7.57	90.8028	7.57	97.6928	7.57	93.11	5	0	9.87	10.38		2479.85	2256.66	2256.66	2085.83	191.839	48.1245	143.714	2143.83	1785.96	164.259	41.2059	123.053		2256.66	90.8028	97.6928	93.11	BioE_COM-S	90.8028	191.839	2064.82	91.499
DE	DE13	Freiburg	0	9	0	7.57	7.57	14.2318	7.57	43.3704	7.57	46.7447	5	0	9.87	10.38		13198.6	12010.7	12010.7	11101.5	9521.54	6286.73	5912.12	11410.2	9505.48	8152.67	5382.91	5062.17		12010.7	14.2318	43.3704	46.7447	BioE_COM-S	14.2318	9521.54	2489.15	20.7245
DE	DE14	Tübingen	0	9	0	7.57	7.57	33.8741	7.57	84.0363	7.57	95.7495	5	0	9.87	10.38		14916.9	13574.3	13574.3	12546.8	8296.66	2002.92	533.298	12895.6	10743	7103.89	1714.97	456.629		13574.3	33.8741	84.0363	95.7495	BioE_COM-S	33.8741	8296.66	5277.68	38.8798
DE	DE21	Oberbayern	0	9	0	7.37101	7.37101	100	7.37101	100	7.37101	100	5	16.4619	17.5066	18.8272		403.754	367.416	367.416	340.334	0	0	0	291.586	266.715	0	0	0		367.416	100	100	100		100	0	367.416	100
DE	DE22	Niederbayern	0	9	0	7.37	7.37	100	7.37	100	7.37	100	5	0	17.51	18.83		225.576	205.274	205.274	190.145	0	0	0	195.01	149.008	0	0	0		205.274	100	100	100		100	0	205.274	100
DE	DE23	Oberpfalz	0	9	0	7.37	7.37	100	7.37	100	7.37	100	5	0	17.51	18.83		87.1417	79.299	79.299	73.4546	0	0	0	75.334	57.5631	0	0	0		79.299	100	100	100		100	0	79.299	100
DE	DE24	Oberfranken	0	9	0	7.37	7.37	14.876	7.37	100	7.37	100	5	0	17.51	18.83		1739.43	1582.88	1582.88	1466.23	1248.11	0	0	1503.74	1149.02	978.087	0	0		1582.88	14.876	100	100	BioE_COM-S	14.876	1248.11	334.775	21.1497
DE	DE25	Mittelfranken	0	9	0	7.37	7.37	100	7.37	100	7.37	100	5	0	17.51	18.83		660.691	601.228	601.228	556.918	0	0	0	571.167	436.432	0	0	0		601.228	100	100	100		100	0	601.228	100
DE	DE26	Unterfranken	0	9	0	7.37	7.37	62.2305	7.37	100	7.37	100	5	0	17.51	18.83		2779.58	2529.41	2529.41	2343	884.938	0	0	2402.94	1836.1	693.486	0	0		2529.41	62.2305	100	100	BioE_COM-S	62.2305	884.938	1644.48	65.0141
DE	DE27	Schwaben	0	9	0	7.37	7.37	0	7.37	36.5297	7.37	100	5	0	17.51	18.83		1528.67	1391.09	1391.09	1288.57	1288.57	817.857	0	1321.54	1009.79	1009.79	640.918	0		1391.09	0	36.5297	100	BioE_COM-S	0	1288.57	102.523	7.37
DE	DE30	Berlin	0	9	0	0	0	0	0	36.5297	0	100	5	0	0	0		0	0	0	0	0	0	0	0	0	0	0	0		0	100	100	100		0	0	0	0
DE	DE40	Brandenburg	0	9	0	0.37594	0.37594	32.6327	0.37594	85.3982	0.37594	100	5	24.0602	24.1509	23.8462		6248.43	5686.07	5686.07	5664.69	3816.15	827.145	0	4102.09	4081.79	2749.79	596.013	0		5686.07	32.6327	85.3982	100	BioE_COM-S	32.6327	3816.15	1869.92	32.886
DE	DE50	Bremen	0	9	0	0	0	32.6327	0	85.3982	0	100	5	0	0	0		0	0	0	0	0	0	0	0	0	0	0	0		0	100	100	100		0	0	0	0
DE	DE60	Hamburg	0	9	0	1.34228	1.34228	0	1.34228	17.0029	1.34228	3.45821	5	11.4094	11.5646	11.9718		2624.64	2388.42	2388.42	2356.36	2356.36	1955.71	2274.88	2010.12	1979.67	1979.67	1643.07	1911.2		2388.42	0	17.0029	3.45821	BioE_COM-S	0	2356.36	32.0594	1.34228
DE	DE71	Darmstadt	0	9	0	5.34351	5.34351	60.9778	5.34351	59.8222	5.34351	57.3333	5	32.0611	33.871	36.036		1811.61	1648.57	1648.57	1560.48	608.933	626.965	665.803	1064.02	980.332	382.547	393.876	418.275		1648.57	60.9778	59.8222	57.3333	BioE_COM-L	57.3333	665.803	982.765	59.6132
DE	DE72	Gießen	0	9	0	5.34	5.34	100	5.34	100	5.34	100	5	0	33.87	36.04		182.34	165.929	165.929	157.069	0	0	0	157.633	98.676	0	0	0		165.929	100	100	100		100	0	165.929	100
DE	DE73	Kassel	0	9	0	5.34	5.34	100	5.34	100	5.34	100	5	0	33.87	36.04		641.086	583.389	583.389	552.236	0	0	0	554.219	346.934	0	0	0		583.389	100	100	100		100	0	583.389	100
DE	DE80	Mecklenburg-Vorpommern	0	9	0	0	0	78.1193	0	100	0	100	5	39.6648	39.6648	40.113		3257.6	2964.41	2964.41	2964.41	648.633	0	0	1699.16	1699.16	371.786	0	0		2964.41	100	100	100	BioE_COM-S	78.1193	648.633	2315.78	78.1193
DE	DE91	Braunschweig	0	9	0	0.929752	0.929752	78.1193	0.929752	100	0.929752	100	5	13.0165	13.0344	12.7524		369.471	336.219	336.219	333.093	72.8829	0	0	277.832	275.192	60.2139	0	0		336.219	78.1193	100	100	BioE_COM-S	78.1193	72.8829	263.336	78.3228
DE	DE92	Hannover	0	9	0	0.93	0.93	78.1193	0.93	100	0.93	100	5	0	13.03	12.75		464.323	422.534	422.534	418.605	91.5934	0	0	401.407	345.857	75.6758	0	0		422.534	78.1193	100	100	BioE_COM-S	78.1193	91.5934	330.941	78.3228
DE	DE93	Lüneburg	0	9	0	0.93	0.93	8.22245	0.93	10.8837	0.93	9.38246	5	0	13.03	12.75		16406.8	14930.2	14930.2	14791.3	13575.1	13181.5	13403.6	14183.7	12220.8	11216	10890.8	11074.2		14930.2	8.22245	10.8837	9.38246	BioE_COM-S	8.22245	13575.1	1355.06	9.07598
DE	DE94	Weser-Ems	0	9	0	0.93	0.93	8.22245	0.93	10.8837	0.93	9.38246	5	0	13.03	12.75		255.127	232.166	232.166	230.007	211.095	204.974	208.426	220.558	190.035	174.409	169.352	172.205		232.166	8.22245	10.8837	9.38246	BioE_COM-S	8.22245	211.095	21.0713	9.07598
DE	DEA1	Düsseldorf	0	9	0	0.621118	0.621118	100	0.621118	100	0.621118	100	5	9.62733	9.6875	9.96785		1373.43	1249.82	1249.82	1242.06	0	0	0	1073.02	1065.65	0	0	0		1249.82	100	100	100		100	0	1249.82	100
DE	DEA2	Köln	0	9	0	0.62	0.62	11.2224	0.62	14.4289	0.62	100	5	0	9.69	9.97		3779.16	3439.03	3439.03	3417.71	3034.16	2924.57	0	3267.08	2932.21	2603.14	2509.12	0		3439.03	11.2224	14.4289	100	BioE_COM-S	11.2224	3034.16	404.873	11.7729
DE	DEA3	Münster	0	9	0	0.62	0.62	11.2224	0.62	14.4289	0.62	100	5	0	9.69	9.97		331.519	301.683	301.683	299.812	266.166	256.553	0	286.598	257.222	228.356	220.108	0		301.683	11.2224	14.4289	100	BioE_COM-S	11.2224	266.166	35.5167	11.7729
DE	DEA4	Detmold	0	9	0	0.62	0.62	11.2224	0.62	14.4289	0.62	100	5	0	9.69	9.97		742.164	675.369	675.369	671.182	595.859	574.338	0	641.601	575.837	511.214	492.75	0		675.369	11.2224	14.4289	100	BioE_COM-S	11.2224	595.859	79.5103	11.7729
DE	DEA5	Arnsberg	0	9	0	0.62	0.62	11.2224	0.62	14.4289	0.62	100	5	0	9.69	9.97		189.135	172.112	172.112	171.045	151.85	146.366	0	163.507	146.748	130.279	125.574	0		172.112	11.2224	14.4289	100	BioE_COM-S	11.2224	151.85	20.2626	11.7729
DE	DEB1	Koblenz	0	9	0	3.41	3.41	92.1376	3.41	94.226	3.41	98.8943	5	0	8.92	9.13		2297.42	2090.65	2090.65	2019.36	158.77	116.597	22.3271	1986.12	1747.27	137.378	100.887	19.3187		2090.65	92.1376	94.226	98.8943	BioE_COM-S	92.1376	158.77	1931.88	92.4057
DE	DEB2	Trier	0	9	0	3.41	3.41	100	3.41	100	3.41	100	5	0	8.92	9.13		406.131	369.579	369.579	356.976	0	0	0	351.1	308.877	0	0	0		369.579	100	100	100		100	0	369.579	100
DE	DEB3	Rheinhessen-Pfalz	0	9	0	3.40681	3.40681	3.80239	3.40681	5.62862	3.40681	2.35775	5	8.81764	8.92116	9.1314		8269	7524.79	7524.79	7268.43	6992.06	6859.32	7097.06	6518.22	6289	6049.87	5935.02	6140.72		7524.79	3.80239	5.62862	2.35775	BioE_COM-L	2.35775	7097.06	427.727	5.68424
DE	DEC0	Saarland	0	9	0	5.55556	5.55556	100	5.55556	100	5.55556	100	5	44.4444	47.0588	53.3333		360.382	327.947	327.947	309.728	0	0	0	173.083	155.775	0	0	0		327.947	100	100	100		100	0	327.947	100
DE	DED2	Dresden	0	9	0	0	0	23.6559	0	23.8351	0	100	5	12.2995	12.2995	12.0968		4491.58	4087.34	4087.34	4087.34	3120.44	3113.12	0	3405.39	3405.39	2599.81	2593.71	0		4087.34	100	100	100	BioE_COM-S	23.6559	3120.44	966.898	23.6559
DE	DED4	Chemnitz	0	9	0	0	0	72.5664	0	100	0	100	5	0	12.3	12.1		555.935	505.901	505.901	505.901	138.787	0	0	480.606	421.492	115.63	0	0		505.901	100	100	100	BioE_COM-S	72.5664	138.787	367.114	72.5664
DE	DED5	Leipzig	0	9	0	0	0	36.4662	0	100	0	100	5	0	12.3	12.1		3134.23	2852.15	2852.15	2852.15	1812.08	0	0	2709.54	2376.26	1509.73	0	0		2852.15	100	100	100	BioE_COM-S	36.4662	1812.08	1040.07	36.4662
DE	DEE0	Sachsen-Anhalt	0	9	0	0.526316	0.526316	84.9143	0.526316	100	0.526316	100	5	26.8421	26.9841	27.2727		4008.31	3647.56	3647.56	3628.37	547.365	0	0	2535.06	2516.82	379.68	0	0		3647.56	84.9143	100	100	BioE_COM-S	84.9143	547.365	3100.2	84.9937
DE	DEF0	Schleswig-Holstein	0	9	0	2.43902	2.43902	24.6154	2.43902	24.6154	2.43902	24.6154	5	13.4146	13.75	13.5135		1385.69	1260.97	1260.97	1230.22	927.396	927.396	927.396	1037.23	1008.01	759.885	759.885	759.885		1260.97	24.6154	24.6154	24.6154	BioE_COM-S & BioE_COM-M & BioE_COM-L	24.6154	927.396	333.579	26.454
DE	DEG0	Thüringen	0	9	0	0.431034	0.431034	45.6897	0.431034	100	0.431034	100	5	10.3448	10.3896	10.0877		3868.24	3520.09	3520.09	3504.92	1903.53	0	0	2998.15	2983.73	1620.48	0	0		3520.09	45.6897	100	100	BioE_COM-S	45.6897	1903.53	1616.56	45.9238
DK	DK01	Hovedstaden	0	9	0	0	0	100	0	100	0	100	1	50	50	50		135.292	123.116	123.116	123.116	0	0	0	60.9422	60.9422	0	0	0		123.116	100	100	100		100	0	123.116	100
DK	DK02	Sjaelland	0	9	0	1.44928	1.44928	42	1.44928	100	1.44928	100	1	18.8406	19.1176	17.1875		1191.21	1084	1084	1068.29	619.609	0	0	870.972	855.419	496.143	0	0		1084	42	100	100	BioE_COM-S	42	619.609	464.393	42.8406
DK	DK03	Syddanmark	0	9	0	1	1	100	1	100	1	100	1	11	11.1111	10.989		1529.05	1391.43	1391.43	1377.52	0	0	0	1225.99	1212.22	0	0	0		1391.43	100	100	100		100	0	1391.43	100
DK	DK04	Midtjylland	0	9	0	0	0	100	0	100	0	100	1	25	25	26.3158		300.69	273.628	273.628	273.628	0	0	0	203.169	203.169	0	0	0		273.628	100	100	100		100	0	273.628	100
DK	DK05	Nordjylland	0	9	0	0	0	100	0	100	0	100	1	42.8571	42.8571	42.8571		105.001	95.5513	95.5513	95.5513	0	0	0	54.0547	54.0547	0	0	0		95.5513	100	100	100		100	0	95.5513	100
EE	EE00	Eesti	0	9	0	4.13223	4.13223	100	4.13223	100	4.13223	100	4	99.1736	100	100		1800	1638	1638	1570.31	0	0	0	12.9957	0	0	0	0		1638	100	100	100		100	0	1638	100
EL	EL30	Attiki	0	9	0	52.381	52.381	100	52.381	100	52.381	100	10	14.2857	30	50		537.395	489.03	489.03	232.871	0	0	0	377.251	146.709	0	0	0		489.03	100	100	100		100	0	489.03	100
EL	EL41	Voreio Aigaio	0	9	0	25.8065	25.8065	100	25.8065	100	25.8065	100	10	0	0	0		30999.2	28209.3	28209.3	20929.5	0	0	0	25388.4	18836.5	0	0	0		28209.3	100	100	100		100	0	28209.3	100
EL	EL42	Notio Aigaio	0	9	0	31.8182	31.8182	100	31.8182	100	31.8182	100	10	0	0	0		527.241	479.79	479.79	327.129	0	0	0	431.811	294.416	0	0	0		479.79	100	100	100		100	0	479.79	100
EL	EL43	Kriti	0	9	0	20	20	100	20	100	20	100	10	8.23529	10.2941	14.6341		2090.57	1902.42	1902.42	1521.93	0	0	0	1571.17	1228.74	0	0	0		1902.42	100	100	100		100	0	1902.42	100
EL	EL51	Anatoliki Makedonia, Thraki	0	9	0	19.0698	19.0698	100	19.0698	100	19.0698	100	10	1.39535	1.72414	2.41935		5661.37	5151.84	5151.84	4169.4	0	0	0	4571.96	3687.76	0	0	0		5151.84	100	100	100		100	0	5151.84	100
EL	EL52	Kentriki Makedonia	0	9	0	15.3619	15.3619	0	15.3619	0	15.3619	0	10	1.02544	1.09506	1.56514		85223	77552.9	77552.9	65639.4	65639.4	65639.4	65639.4	69081.9	58428.5	58428.5	58428.5	58428.5		77552.9	0	0	0	BioE_COM-S & BioE_COM-M & BioE_COM-L	0	65639.4	11913.6	15.3619
EL	EL53	Dytiki Makedonia	0	9	0	11.7207	11.7207	0	11.7207	0	11.7207	0	10	1.99501	2.25989	2.6087		10086.1	9178.33	9178.33	8102.57	8102.57	8102.57	8102.57	8095.7	7127.51	7127.51	7127.51	7127.51		9178.33	0	0	0	BioE_COM-S & BioE_COM-M & BioE_COM-L	0	8102.57	1075.76	11.7207
EL	EL54	Ipeiros	0	9	0	31.5315	31.5315	0	31.5315	0	31.5315	0	10	5.40541	7.89474	11.1111		2707.43	2463.76	2463.76	1686.9	1686.9	1686.9	1686.9	2097.53	1398.35	1398.35	1398.35	1398.35		2463.76	0	0	0	BioE_COM-S & BioE_COM-M & BioE_COM-L	0	1686.9	776.861	31.5315
EL	EL61	Thessalia	0	9	0	16.4138	16.4138	0	16.4138	0	16.4138	0	10	2.2069	2.47525	2.94118		17889.9	16279.8	16279.8	13607.7	13607.7	13607.7	13607.7	14328.5	11943.7	11943.7	11943.7	11943.7		16279.8	0	0	0	BioE_COM-S & BioE_COM-M & BioE_COM-L	0	13607.7	2672.13	16.4138
EL	EL62	Ionia Nisia	0	9	0	50	50	0	50	0	50	0	10	0	0	0		195.347	177.766	177.766	88.8829	88.8829	88.8829	88.8829	159.989	79.9946	79.9946	79.9946	79.9946		177.766	0	0	0	BioE_COM-S & BioE_COM-M & BioE_COM-L	0	88.8829	88.8829	50
EL	EL63	Dytiki Ellada	0	9	0	26.5306	26.5306	0	26.5306	0	26.5306	0	10	7.14286	9.72222	12.8205		2307.86	2100.16	2100.16	1542.97	1542.97	1542.97	1542.97	1755.13	1253.66	1253.66	1253.66	1253.66		2100.16	0	0	0	BioE_COM-S & BioE_COM-M & BioE_COM-L	0	1542.97	557.184	26.5306
EL	EL64	Sterea Ellada	0	9	0	22.7848	22.7848	0	22.7848	0	22.7848	0	10	4.21941	4.91803	5.76923		4862.35	4424.73	4424.73	3416.57	3416.57	3416.57	3416.57	3814.23	2923.69	2923.69	2923.69	2923.69		4424.73	0	0	0	BioE_COM-S & BioE_COM-M & BioE_COM-L	0	3416.57	1008.17	22.7848
EL	EL65	Peloponnisos	0	9	0	10.4079	10.4079	0	10.4079	0	10.4079	0	10	3.93812	4.23862	5.41176		14613	13297.8	13297.8	11913.8	11913.8	11913.8	11913.8	11496.7	10267.9	10267.9	10267.9	10267.9		13297.8	0	0	0	BioE_COM-S & BioE_COM-M & BioE_COM-L	0	11913.8	1384.02	10.4079
ES	ES11	Galicia	1.20846	9	0	16.9935	16.9935	29.3051	16.9935	51.5861	16.9935	99.7734	0	5.55556	5.90551	6.28019		5992.14	5386.96	5386.96	4471.53	3161.14	2164.84	10.1319	5087.68	4207.46	2974.46	2036.99	9.53352		5386.96	29.3051	51.5861	99.7734	BioE_COM-S	29.3051	3161.14	2225.82	41.3186
ES	ES12	Principado de Asturias	0	9	0	13.6986	13.6986	56.25	13.6986	100	13.6986	100	0	2.73973	2.77778	2.60417		5624.38	5118.19	5118.19	4417.06	1932.47	0	0	4977.96	4294.37	1878.79	0	0		5118.19	56.25	100	100	BioE_COM-S	56.25	1932.47	3185.72	62.2432
ES	ES13	Cantabria	0	9	0	6.66667	6.66667	56.25	6.66667	100	6.66667	100	0	0	0	0		300.801	273.729	273.729	255.48	111.773	0	0	273.729	255.48	111.773	0	0		273.729	56.25	100	100	BioE_COM-S	56.25	111.773	161.956	59.1667
ES	ES21	País Vasco	0	9	0	17.4157	17.4157	0.247001	17.4157	0	17.4157	0	0	2.24719	2.04082	2.24719		3746.67	3409.47	3409.47	2815.68	2808.73	2815.68	2815.68	3332.85	2758.22	2751.41	2758.22	2758.22		3409.47	0.247001	0	0	BioE_COM-M & BioE_COM-L	0	2815.68	593.784	17.4157
ES	ES22	Comunidad Foral de Navarra	0.0254453	9	0	4.1791	4.1791	20.9924	4.1791	45.1908	4.1791	37.659	0	9.25373	9.65732	10.6529		7846.44	7138.45	7138.45	6840.12	5404.22	3749.01	4264.2	6477.87	6179.55	4882.32	3386.96	3852.39		7138.45	20.9924	45.1908	37.659	BioE_COM-S	20.9924	5404.22	1734.23	24.2942
ES	ES23	La Rioja	0.00898715	9	0	6.19048	6.19048	4.09814	6.19048	10.1735	6.19048	3.92738	0	14.7619	15.736	18.6186		8698.44	7914.87	7914.87	7424.9	7120.62	6669.53	7133.3	6746.48	6256.52	6000.12	5620.01	6010.8		7914.87	4.09814	10.1735	3.92738	BioE_COM-L	3.92738	7133.3	781.573	9.87474
ES	ES24	Arag¾n	0.0102912	9	0	2.37203	2.37203	13.0596	2.37203	28.9132	2.37203	30.0864	0	3.72035	3.81074	4.07549		81306.3	73981.1	73981.1	72226.2	62793.8	51343.3	50495.9	71228.7	69473.9	60400.9	49386.7	48571.7		73981.1	13.0596	28.9132	30.0864	BioE_COM-S	13.0596	62793.8	11187.3	15.1218
ES	ES30	Comunidad de Madrid	0	9	0	5.26316	5.26316	46.3636	5.26316	59.8701	5.26316	40.4416	0	0	0	0		338.041	307.618	307.618	291.427	156.311	116.949	173.57	307.618	291.427	156.311	116.949	173.57		307.618	46.3636	59.8701	40.4416	BioE_COM-L	40.4416	173.57	134.048	43.5762
ES	ES41	Castilla y Le¾n	0.22495	9	0	17.3913	17.3913	46.4876	17.3913	74.4199	17.3913	87.917	0	1.15942	1.05263	1.44231		6940.46	6301.61	6301.61	5205.68	2785.68	1331.61	629.004	6228.55	5150.88	2756.36	1317.6	622.383		6301.61	46.4876	74.4199	87.917	BioE_COM-S	46.4876	2785.68	3515.92	55.7941
ES	ES42	Castilla-La Mancha	0.0302138	9	0	4.07407	4.07407	20.4799	4.07407	38.1331	4.07407	24.2692	0	100	100	100		9605.45	8738.32	8738.32	8382.32	6665.63	5185.88	6347.99	0	0	0	0	0		8738.32	20.4799	38.1331	24.2692	BioE_COM-S	20.4799	6665.63	2072.7	23.7196
ES	ES43	Extremadura	0.692464	9	0	6.14545	6.14545	10.6947	6.14545	25.1776	6.14545	16.9224	0	8.18182	8.67881	9.83607		59887.3	54120.1	54120.1	50794.2	45361.9	38005.4	42198.6	49692.1	46385.8	41425	34707	38536.2		54120.1	10.6947	25.1776	16.9224	BioE_COM-S	10.6947	45361.9	8758.22	16.1829
ES	ES51	Cataluña	0.328135	9	0	1.64284	1.64284	4.75202	1.64284	9.15614	1.64284	5.1276	0	3.92575	3.96963	4.08688		108731	98620.8	98620.8	97000.6	92391.1	88119.1	92026.8	94749.2	93150.1	88723.5	84621.1	88373.7		98620.8	4.75202	9.15614	5.1276	BioE_COM-S	4.75202	92391.1	6229.67	6.31679
ES	ES52	Comunidad Valenciana	0.155739	9	0	15.25	15.25	52.3175	15.25	69.1924	15.25	58.2584	0	20.25	23.6971	31.9973		44465.9	40400.9	40400.9	34239.8	16326.4	10548.4	14292.3	32219.7	26125.9	12457.5	8048.77	10905.4		40400.9	52.3175	69.1924	58.2584	BioE_COM-S	52.3175	16326.4	24074.6	59.5891
ES	ES53	Illes Balears	0.822888	9	0	7.56303	7.56303	11.4892	7.56303	19.9715	7.56303	16.7459	0	100	100	100		2000.06	1805.08	1805.08	1668.56	1476.86	1335.32	1389.14	0	0	0	0	0		1805.08	11.4892	19.9715	16.7459	BioE_COM-S	11.4892	1476.86	328.223	18.1833
ES	ES61	Andalucía	0.695187	9	0	10.5624	10.5624	9.26462	10.5624	14.7899	10.5624	10.4232	0	87.8944	97.9678	100		52120.9	47100.2	47100.2	42125.3	38222.6	35895	37734.5	5701.78	856.074	776.762	729.462	766.844		47100.2	9.26462	14.7899	10.4232	BioE_COM-S	9.26462	38222.6	8877.68	18.8485
ES	ES62	Regi¾n de Murcia	0.0569653	9	0	7.79673	7.79673	33.8607	7.79673	71.5873	7.79673	37.4987	0	66.2374	71.7252	78.7547		54175.5	49271.6	49271.6	45430	30047.1	12907.9	28394.4	16635.4	12845.3	8495.77	3649.69	8028.45		49271.6	33.8607	71.5873	37.4987	BioE_COM-S	33.8607	30047.1	19224.5	39.0174
ES	ES63	Ciudad Autónoma de Ceuta	0.0569653	9	0	0	0	33.8607	0	71.5873	0	37.4987	0	0	0	0		0	0	0	0	0	0	0	0	0	0	0	0		0	100	100	100		0	0	0	0
ES	ES64	Ciudad Autónoma de Melilla	0.0569653	9	0	0	0	33.8607	0	71.5873	0	37.4987	0	0	0	0		0	0	0	0	0	0	0	0	0	0	0	0		0	100	100	100		0	0	0	0
ES	ES70	Canarias	17.6986	9	0	27.9116	27.9116	39.76	27.9116	84.4351	27.9116	92.1318	0	1.80723	1.94986	1.6		26349.8	19734.5	19734.5	14226.3	8569.91	2214.3	1119.35	19377.8	13948.9	8402.8	2171.12	1097.52		19734.5	39.76	84.4351	92.1318	BioE_COM-S	39.76	8569.91	11164.6	56.5739
FI	FI19	Lõnsi-Suomi	17.6986	9	0	0	0	39.76	0	84.4351	0	92.1318	1	100	100	100		75	56.1707	56.1707	56.1707	33.8373	8.7429	4.4196	0	0	0	0	0		56.1707	100	100	100	BioE_COM-S	39.76	33.8373	22.3334	39.76
FI	FI1B	Helsinki-Uusimaa	17.6986	9	0	0	0	39.76	0	84.4351	0	92.1318	1	27.2727	27.2727	33.3333		165	123.576	123.576	123.576	74.442	19.2344	9.72313	88.9744	88.9744	53.5982	13.8487	7.00065		123.576	100	100	100	BioE_COM-S	39.76	74.442	49.1336	39.76
FI	FI1C	Etelõ-Suomi	17.6986	9	0	4.16667	4.16667	39.76	4.16667	84.4351	4.16667	92.1318	1	45.8333	47.8261	47.619		345	258.385	258.385	247.619	149.166	38.5416	19.4831	138.559	127.901	77.0474	19.9076	10.0634		258.385	39.76	84.4351	92.1318	BioE_COM-S	39.76	149.166	109.219	42.27
FI	FI1D	Pohjois- ja Suomi	17.6986	9	0	16.6667	16.6667	39.76	16.6667	84.4351	16.6667	92.1318	1	100	100	100		75	56.1707	56.1707	46.8089	28.1977	7.28575	3.683	0	0	0	0	0		56.1707	39.76	84.4351	92.1318	BioE_COM-S	39.76	28.1977	27.973	49.8
FI	FI20	┼land	17.6986	9	0	3.33333	3.33333	39.76	3.33333	84.4351	3.33333	92.1318	1	0	0	0		450	337.024	337.024	325.79	196.256	50.7088	25.6337	333.654	322.532	194.294	50.2017	25.3774		337.024	39.76	84.4351	92.1318	BioE_COM-S	39.76	196.256	140.768	41.768
FR	FR10	Ille-de-France	0	9	0	1.08696	1.08696	100	1.08696	100	1.08696	100	0.25	6.52174	6.59341	6.81818		2251.82	2049.15	2049.15	2026.88	0	0	0	1910.72	1888.51	0	0	0		2049.15	100	100	100		100	0	2049.15	100
FR	FR21	Champagne-Ardenne	0	9	0	0	0	26.8608	0	51.2204	0	56.6941	0.25	2.85714	2.85714	3.125		796.645	724.947	724.947	724.947	530.22	353.626	313.945	702.474	702.474	513.784	342.664	304.213		724.947	100	100	100	BioE_COM-S	26.8608	530.22	194.727	26.8608
FR	FR22	Picardie	0	9	0	1.18343	1.18343	68.9829	1.18343	100	1.18343	100	0.25	3.5503	3.59281	3.68098		3564.69	3243.87	3243.87	3205.48	994.248	0	0	3120.88	3082.59	956.13	0	0		3243.87	68.9829	100	100	BioE_COM-S	68.9829	994.248	2249.62	69.3499
FR	FR23	Haute-Normandie	0	9	0	0.729927	0.729927	100	0.729927	100	0.729927	100	0.25	9.12409	9.19118	9.4697		5133.02	4671.04	4671.04	4636.95	0	0	0	4234.24	4200.23	0	0	0		4671.04	100	100	100		100	0	4671.04	100
FR	FR24	Centre	0	9	0	0.847458	0.847458	37.2515	0.847458	92.6722	0.847458	89.9561	0.25	6.77966	6.83761	6.97674		9393.29	8547.89	8547.89	8475.45	5318.22	621.063	851.268	7948.45	7876.2	4942.19	577.151	791.079		8547.89	37.2515	92.6722	89.9561	BioE_COM-S	37.2515	5318.22	3229.67	37.7833
FR	FR25	Basse-Normandie	0	9	0	1.23675	1.23675	35.6522	1.23675	100	1.23675	100	0.25	11.3074	11.449	11.9403		10175.1	9259.35	9259.35	9144.84	5884.5	0	0	8191.83	8077.6	5197.76	0	0		9259.35	35.6522	100	100	BioE_COM-S	35.6522	5884.5	3374.85	36.448
FR	FR26	Bourgogne	0	9	0	7.14286	7.14286	7.2456	7.14286	33.2978	7.14286	48.082	0.25	11.4286	12.3077	11.8644		1769.32	1610.08	1610.08	1495.08	1386.75	997.249	776.213	1422.51	1307.79	1213.03	872.324	678.978		1610.08	7.2456	33.2978	48.082	BioE_COM-S	7.2456	1386.75	223.333	13.8709
FR	FR30	Nord - Pas-de-Calais	0	9	0	0	0	100	0	100	0	100	0.25	16.3636	16.3636	17.3077		989.935	900.841	900.841	900.841	0	0	0	751.547	751.547	0	0	0		900.841	100	100	100		100	0	900.841	100
FR	FR41	Lorraine	0	9	0	8.96861	8.96861	100	8.96861	100	8.96861	100	0.25	10.7623	11.8227	12.6984		4742.86	4316	4316	3928.92	0	0	0	3841.87	3455.75	0	0	0		4316	100	100	100		100	0	4316	100
FR	FR42	Alsace	0	9	0	4.34783	4.34783	31.685	4.34783	44.8174	4.34783	62.8132	0.25	13.0435	13.6364	13.7255		2669.78	2429.5	2429.5	2323.87	1587.55	1282.37	864.173	2107.33	2001.96	1367.64	1104.73	744.465		2429.5	31.685	44.8174	62.8132	BioE_COM-S	31.685	1587.55	841.947	34.6552
FR	FR43	Franche-ComtÚ	0	9	0	6.06061	6.06061	74.5474	6.06061	100	6.06061	100	0.25	21.2121	22.5806	23.3333		730.156	664.442	664.442	624.173	158.868	0	0	522.191	482.023	122.687	0	0		664.442	74.5474	100	100	BioE_COM-S	74.5474	158.868	505.574	76.09
FR	FR51	Pays de la Loire	0	9	0	0.46729	0.46729	30.0082	0.46729	49.624	0.46729	43.8344	0.25	6.19159	6.22066	6.18312		22071.3	20084.9	20084.9	19991	13992.1	10070.7	11228.1	18794.2	18700.6	13088.9	9420.6	10503.3		20084.9	30.0082	49.624	43.8344	BioE_COM-S	30.0082	13992.1	6092.79	30.3352
FR	FR52	Bretagne	0	9	0	2.90909	2.90909	0	2.90909	100	2.90909	100	0.25	15.2727	15.3558	15.6		5245.1	4773.04	4773.04	4634.19	4634.19	0	0	4033.96	3912.77	3912.77	0	0		4773.04	0	100	100	BioE_COM-S	0	4634.19	138.852	2.90909
FR	FR53	Poitou-Charentes	0.0360008	9	0	0.591716	0.591716	14.3335	0.591716	23.7657	0.591716	12.7546	0.25	9.46746	9.52381	9.69697		4465.8	4062.41	4062.41	4038.37	3459.54	3078.63	3523.3	3668.61	3644.63	3122.23	2778.46	3179.78		4062.41	14.3335	23.7657	12.7546	BioE_COM-L	12.7546	3523.3	539.116	13.2708
FR	FR61	Aquitaine	0.057869	9	0	0.88634	0.88634	5.62776	0.88634	10.0065	0.88634	6.31736	0.25	14.9114	14.9395	14.7576		50367.4	45807.8	45807.8	45401.8	42846.7	40858.7	42533.6	38879.8	38522.4	36354.5	34667.7	36088.8		45807.8	5.62776	10.0065	6.31736	BioE_COM-S	5.62776	42846.7	2961.12	6.46422
FR	FR62	Midi-PyrÚnÚes	0.117193	9	0	0.617761	0.617761	16.3932	0.617761	35.6128	0.617761	24.0452	0.25	4.40154	4.4289	4.25197		32809.6	29821.7	29821.7	29637.5	24779	19082.7	22511.1	28437.8	28254.1	23622.3	18192	21460.3		29821.7	16.3932	35.6128	24.0452	BioE_COM-S	16.3932	24779	5042.77	16.9097
FR	FR63	Limousin	0	9	0	0.37594	0.37594	40.056	0.37594	76.4706	0.37594	100	0.25	11.2782	11.3208	11.1538		5783.88	5263.33	5263.33	5243.54	3143.19	1233.77	0	4658.04	4638.31	2780.39	1091.37	0		5263.33	40.056	76.4706	100	BioE_COM-S	40.056	3143.19	2120.14	40.2814
FR	FR71	Rh¶ne-Alpes	0.987429	9	0	1.70293	1.70293	15.8903	1.70293	33.888	1.70293	30.2583	0.25	12.9612	13.0895	13.0976		48915.4	44073.5	44073.5	43322.9	36438.8	28641.7	30214.2	38265.1	37558	31590	24830.4	26193.6		44073.5	15.8903	33.888	30.2583	BioE_COM-S	15.8903	36438.8	7634.68	17.3226
FR	FR72	Auvergne	0	9	0	4.7619	4.7619	100	4.7619	100	4.7619	100	0.25	19.0476	20	18.75		399.137	363.215	363.215	345.919	0	0	0	293.296	276.043	0	0	0		363.215	100	100	100		100	0	363.215	100
FR	FR81	Languedoc-Roussillon	0.144418	9	0	2.04473	2.04473	4.76581	2.04473	8.86176	2.04473	2.4674	0.25	8.24281	8.28441	7.80287		37825.5	34371.5	34371.5	33668.7	32064.1	30685	32837.9	31459.5	30802.2	29334.2	28072.6	30042.2		34371.5	4.76581	8.86176	2.4674	BioE_COM-L	2.4674	32837.9	1533.55	4.46168
FR	FR82	Provence-Alpes-C¶te d'Azur	0.250887	9	0	1.11607	1.11607	13.3122	1.11607	28.1424	1.11607	20.2838	0.25	4.64286	4.65011	4.59824		54075.1	49084.8	49084.8	48537	42075.7	34877.5	38691.9	46688.9	46164.3	40018.8	33172.5	36800.4		49084.8	13.3122	28.1424	20.2838	BioE_COM-S	13.3122	42075.7	7009.17	14.2797
FR	FR83	Corse	0.593575	9	0	0.746269	0.746269	35.5796	0.746269	69.9721	0.746269	100	0.25	44.0299	44.3609	46.0938		3148.74	2848.34	2848.34	2827.09	1821.22	848.916	0	1590.24	1569.03	1010.78	471.149	0		2848.34	35.5796	69.9721	100	BioE_COM-S	35.5796	1821.22	1027.12	36.0604
FR	FRA1	Guadeloupe	0.593575	9	0	4.91803	4.91803	35.5796	4.91803	69.9721	4.91803	100	0.25	0	0	0		8540	7725.27	7725.27	7345.34	4731.9	2205.65	0	7705.96	7326.98	4720.07	2200.14	0		7725.27	35.5796	69.9721	100	BioE_COM-S	35.5796	4731.9	2993.37	38.7478
FR	FRA2	Martinique	0.593575	9	0	1.42653	1.42653	35.5796	1.42653	69.9721	1.42653	100	0.25	0	0	0		19628	17755.5	17755.5	17502.2	11275	5255.54	0	17711.1	17458.4	11246.8	5242.4	0		17755.5	35.5796	69.9721	100	BioE_COM-S	35.5796	11275	6480.49	36.4986
FR	FRA3	Guyane	0.593575	9	0	21.4575	21.4575	35.5796	21.4575	69.9721	21.4575	100	0.25	0	0	0		3705	3351.54	3351.54	2632.38	1695.79	790.45	0	3343.16	2625.8	1691.55	788.474	0		3351.54	35.5796	69.9721	100	BioE_COM-S	35.5796	1695.79	1655.75	49.4026
FR	FRA4	RÚunion	0.593575	9	0	18.2186	18.2186	35.5796	18.2186	69.9721	18.2186	100	0.25	0.404858	0.49505	0		6866.94	6211.82	6211.82	5080.11	3272.63	1525.45	0	6171.21	5042.33	3248.29	1514.11	0		6211.82	35.5796	69.9721	100	BioE_COM-S	35.5796	3272.63	2939.19	47.3161
HR	HR03	Jadranska Hrvatska	5.00495	9	0	39.4102	39.4102	52.1563	39.4102	92.087	39.4102	100	0.25	0.268097	0.442478	0.847458		8964.03	7749	7749	4695.11	2246.31	371.522	0	7708.91	4662.65	2230.78	368.953	0		7749	52.1563	92.087	100	BioE_COM-S	52.1563	2246.31	5502.69	71.0116
HR	HR04	Kontinentalna Hrvatska	0	9	0	19.1566	19.1566	19.6388	19.1566	80.6321	19.1566	100	0.25	6.80723	7.89866	10.9977		45981.4	41843	41843	33827.3	27184	6551.66	0	38897.2	31077.5	24974.3	6019.08	0		41843	19.6388	80.6321	100	BioE_COM-S	19.6388	27184	14659	35.0333
HU	HU10	Közép-Magyarország	0	9	0	8.03324	8.03324	53.238	8.03324	99.4603	8.03324	100	0	3.87812	4.21687	4.42338		18481.3	16817.9	16817.9	15466.9	7232.64	83.4696	0	16165.7	14814.7	6927.65	79.9498	0		16817.9	53.238	99.4603	100	BioE_COM-S	53.238	7232.64	9585.3	56.9945
HU	HU21	Közép-Dunántúl	0	9	0	14.9533	14.9533	88.6598	14.9533	100	14.9533	100	0	8.09969	9.52381	9.92366		8386.12	7631.37	7631.37	6490.23	736.005	0	0	7013.25	5872.11	665.91	0	0		7631.37	88.6598	100	100	BioE_COM-S	88.6598	736.005	6895.36	90.3555
HU	HU22	Nyugat-Dunántúl	0	9	0	27.9188	27.9188	92.598	27.9188	100	27.9188	100	0	13.4518	18.662	20.4633		10846.9	9870.68	9870.68	7114.91	526.643	0	0	8542.9	5787.12	428.361	0	0		9870.68	92.598	100	100	BioE_COM-S	92.598	526.643	9344.04	94.6646
HU	HU23	Dél-Dunántúl	0	9	0	25.5319	25.5319	70.5856	25.5319	99.9404	25.5319	100	0	7.80142	10.4762	11.4286		11712	10657.9	10657.9	7936.77	2334.55	4.7306	0	9826.47	7105.29	2089.98	4.23501	0		10657.9	70.5856	99.9404	100	BioE_COM-S	70.5856	2334.55	8323.39	78.0957
HU	HU31	Észak-Magyarország	0	9	0	18.0645	18.0645	38.3548	18.0645	91.1837	18.0645	99.449	0	7.74194	9.44882	9.84529		25362.5	23079.9	23079.9	18910.6	11657.5	1667.22	104.201	21293.1	17123.8	10556	1509.68	94.3552		23079.9	38.3548	91.1837	99.449	BioE_COM-S	38.3548	11657.5	11422.4	49.4907
HU	HU32	Észak-Alföld	0	9	0	15.095	15.095	25.7606	15.095	43.2429	15.095	26.1133	0	5.46824	6.44042	7.1176		81937.6	74563.2	74563.2	63307.9	46999.4	35931.7	46776.1	70485.9	59230.6	43972.5	33617.6	43763.6		74563.2	25.7606	43.2429	26.1133	BioE_COM-S	25.7606	46999.4	27563.8	36.967
HU	HU33	Dél-Alföld	0	9	0	11.4453	11.4453	32.1212	11.4453	58.3377	11.4453	43.8182	0	3.42523	3.86792	4.36681		30820.6	28046.7	28046.7	24836.7	16858.8	10347.5	13953.7	27086	23876	16206.8	9947.31	13414		28046.7	32.1212	58.3377	43.8182	BioE_COM-S	32.1212	16858.8	11187.9	39.8901
IE	IE01	Border, Midland and Western	0	9	0	0	0	32.1212	0	58.3377	0	43.8182	1	0	0	0		150	136.5	136.5	136.5	92.6545	56.8691	76.6882	135.135	135.135	91.728	56.3004	75.9213		136.5	100	100	100	BioE_COM-S	32.1212	92.6545	43.8455	32.1212
IE	IE02	Southern and Eastern	0	9	0	0	0	32.1212	0	58.3377	0	43.8182	1	0	0	0		795	723.45	723.45	723.45	491.069	301.406	406.447	716.216	716.216	486.158	298.392	402.383		723.45	100	100	100	BioE_COM-S	32.1212	491.069	232.381	32.1212
IT	ITC1	Piemonte	0.217174	9	0	6.4833	6.4833	5.9224	6.4833	10.6239	6.4833	12.5902	0	20.7269	21.2185	19.2094		50035.7	45433.6	45433.6	42488	39971.7	37974.1	37138.7	36016.6	33472.7	31490.3	29916.6	29258.4		45433.6	5.9224	10.6239	12.5902	BioE_COM-S	5.9224	39971.7	5461.91	12.0217
IT	ITC2	Valle d'Aosta/VallÚe d'Aoste	23.4848	9	0	50	50	100	50	100	50	100	0	5	10	20		301.766	210.116	210.116	105.058	0	0	0	199.61	94.5522	0	0	0		210.116	100	100	100		100	0	210.116	100
IT	ITC3	Liguria	5.53111	9	0	60.5263	60.5263	41.0434	60.5263	52.7656	60.5263	53.4884	0	34.2105	80	100		960.812	825.978	825.978	326.044	192.225	154.005	151.648	543.407	65.2088	38.4449	30.801	30.3297		825.978	41.0434	52.7656	53.4884	BioE_COM-S	41.0434	192.225	633.753	76.7276
IT	ITC4	Lombardia	4.37391	9	0	11.9159	11.9159	13.4466	11.9159	26.0685	11.9159	21.3697	0	9.57944	10.0796	10.9589		10965	9541.74	9541.74	8404.76	7274.6	6213.77	6608.69	8627.7	7557.6	6541.35	5587.45	5942.56		9541.74	13.4466	26.0685	21.3697	BioE_COM-S	13.4466	7274.6	2267.14	23.7602
IT	ITF1	Abruzzo	1.25987	9	0	15.3846	15.3846	9.26953	15.3846	16.7309	15.3846	11.8154	0	14.5749	17.2249	22.7941		5737.73	5155.55	5155.55	4362.39	3958.02	3632.53	3846.96	4404.14	3610.97	3276.25	3006.83	3184.32		5155.55	9.26953	16.7309	11.8154	BioE_COM-S	9.26953	3958.02	1197.54	23.2281
IT	ITF2	Molise	0.689655	9	0	7	7	14.063	7	29.5052	7	24.7676	0	22	23.6559	26.5823		2357.39	2130.43	2130.43	1981.3	1702.67	1396.71	1490.58	1661.73	1512.6	1299.89	1066.31	1137.97		2130.43	14.063	29.5052	24.7676	BioE_COM-S	14.063	1702.67	427.759	20.0786
IT	ITF3	Campania	2.94054	9	0	11.7349	11.7349	11.2469	11.7349	20.448	11.7349	9.85529	0	22.8366	25.6337	31.1646		54580.3	48207.5	48207.5	42550.4	37764.8	33849.7	38357	37198.5	31643.2	28084.3	25172.8	28524.7		48207.5	11.2469	20.448	9.85529	BioE_COM-L	9.85529	38357	9850.58	20.4337
IT	ITF4	Puglia	0.425932	9	0	16.2474	16.2474	1.94955	16.2474	4.63333	16.2474	3.35229	0	31.6038	37.5469	49.2241		39632	35911.5	35911.5	30076.8	29490.4	28683.3	29068.5	24562.1	18783.9	18417.7	17913.6	18154.2		35911.5	1.94955	4.63333	3.35229	BioE_COM-S	1.94955	29490.4	6421.04	17.8802
IT	ITF5	Basilicata	0.460429	9	0	4.66884	4.66884	26.7049	4.66884	42.8096	4.66884	23.6302	0	26.6015	27.7904	31.6156		24101.7	21831.5	21831.5	20812.3	15254.4	11902.6	15894.3	16024	15028.4	11015.1	8594.82	11477.2		21831.5	26.7049	42.8096	23.6302	BioE_COM-L	23.6302	15894.3	5937.26	27.1958
IT	ITF6	Calabria	1.16964	9	0	9.52381	9.52381	4.15599	9.52381	7.19301	9.52381	3.77383	0	26.455	29.0936	32.9843		15795	14205.4	14205.4	12852.5	12318.3	11928	12367.4	10447.3	9113.23	8734.48	8457.71	8769.31		14205.4	4.15599	7.19301	3.77383	BioE_COM-L	3.77383	12367.4	1837.92	12.9382
IT	ITG1	Sicilia	1.77257	9	0	11.745	11.745	23.1852	11.745	36.9344	11.745	22.2833	0	75.2517	84.7909	100		20685.1	18489.8	18489.8	16318.2	12534.8	10291.2	12682	4575.92	2481.85	1906.43	1565.2	1928.82		18489.8	23.1852	36.9344	22.2833	BioE_COM-L	22.2833	12682	5807.85	31.4111
IT	ITG2	Sardegna	0.271239	9	0	17.4888	17.4888	31.0084	17.4888	60.6219	17.4888	73.283	0	14.7982	17.9348	23.4848		4702.27	4267.46	4267.46	3521.13	2429.28	1386.55	940.742	3635.95	2889.62	1993.6	1137.88	772.022		4267.46	31.0084	60.6219	73.283	BioE_COM-S	31.0084	2429.28	1838.17	43.0742
IT	ITH1	Provincia Autonoma Bolzano/Bozen	18.7184	9	0	11.7271	11.7271	2.60764	11.7271	5.21528	11.7271	9.82414	0	7.67591	8.15217	9.684		30767.3	22757.4	22757.4	20088.6	19564.8	19041	18115.1	21010.6	18451	17969.8	17488.7	16638.3		22757.4	2.60764	5.21528	9.82414	BioE_COM-S	2.60764	19564.8	3192.62	14.0289
IT	ITH2	Provincia Autonoma Trento	17.3829	9	0	22.1137	22.1137	15.4273	22.1137	23.0082	22.1137	13.3752	0	3.19716	3.53478	5.13393		21421.4	16105	16105	12543.6	10608.4	9657.51	10865.8	15590.1	12100.2	10233.4	9316.14	10481.8		16105	15.4273	23.0082	13.3752	BioE_COM-L	13.3752	10865.8	5239.12	32.5311
IT	ITH3	Veneto	2.97166	9	0	5.77378	5.77378	7.03257	5.77378	11.6751	5.77378	9.78215	0	7.57217	7.83526	8.24866		54299.6	47944.2	47944.2	45176	41999	39901.7	40756.9	44313.8	41636.4	38708.3	36775.3	37563.4		47944.2	7.03257	11.6751	9.78215	BioE_COM-S	7.03257	41999	5945.23	12.4003
IT	ITH4	Friuli-Venezia Giulia	0	9	0	2.17391	2.17391	20.5025	2.17391	38.4029	2.17391	48.6765	0	8.69565	8.51852	7.8125		6339.49	5768.94	5768.94	5643.53	4486.47	3476.25	2896.45	5267.29	5162.78	4104.29	3180.13	2649.72		5768.94	20.5025	38.4029	48.6765	BioE_COM-S	20.5025	4486.47	1282.47	22.2307
IT	ITH5	Emilia-Romagna	0.0263852	9	0	2.62607	2.62607	17.1768	2.62607	29.1293	2.62607	24.7493	0	5.01047	5.06287	5.15791		167715	152581	152581	148574	123054	105295	111803	144936	141052	116824	99964.4	106142		152581	17.1768	29.1293	24.7493	BioE_COM-S	17.1768	123054	29527.1	19.3518
IT	ITI1	Toscana	0.451054	9	0	8.94737	8.94737	14.3174	8.94737	30.4814	8.94737	21.3088	0	36.8421	40.1734	45.2055		9327.76	8449.97	8449.97	7693.92	6592.35	5348.71	6054.44	5336.83	4603.01	3943.98	3199.95	3622.17		8449.97	14.3174	30.4814	21.3088	BioE_COM-S	14.3174	6592.35	1857.62	21.9838
IT	ITI2	Umbria	2.66376	9	0	6.52174	6.52174	22.0524	6.52174	65.6914	6.52174	53.0713	0	35.8696	38.3721	42.1053		2406.64	2131.71	2131.71	1992.68	1553.25	683.662	935.14	1367.07	1228.05	957.235	421.326	576.307		2131.71	22.0524	65.6914	53.0713	BioE_COM-S	22.0524	1553.25	578.459	27.1359
IT	ITI3	Marche	0	9	0	9.43396	9.43396	64.5556	9.43396	88	9.43396	93.2222	0	17.7358	19.1667	20.5405		7194.54	6547.03	6547.03	5929.38	2101.64	711.526	401.88	5385.86	4792.92	1698.82	575.15	324.853		6547.03	64.5556	88	93.2222	BioE_COM-S	64.5556	2101.64	4445.39	67.8994
IT	ITI4	Lazio	2.8532	9	0	10.9957	10.9957	13.9902	10.9957	34.8754	10.9957	30.3477	0	49.0043	54.6693	66.0668		28518.4	25211.3	25211.3	22439.1	19299.8	14613.4	15629.4	12856.7	10171.8	8748.76	6624.36	7084.9		25211.3	13.9902	34.8754	30.3477	BioE_COM-S	13.9902	19299.8	5911.43	23.4476
LT	LT00	Lietuva	0	9	0	8.80121	8.80121	42.0103	8.80121	100	8.80121	100	4	41.047	44.8419	61.9325		20621.5	18765.6	18765.6	17114	9924.34	0	0	10620.3	9062.14	5255.11	0	0		18765.6	42.0103	100	100	BioE_COM-S	42.0103	9924.34	8841.23	47.1141
LU	LU00	Luxembourg	0	9	0	0	0	100	0	100	0	100	1	23.0769	23.0769	27.2727		207.594	188.911	188.911	188.911	0	0	0	143.863	143.863	0	0	0		188.911	100	100	100		100	0	188.911	100
LV	LV00	Latvija	0	9	0	0.622084	0.622084	72.3485	0.622084	100	0.622084	100	4	10.2644	10.3286	10.9797		9679.42	8808.27	8808.27	8753.48	2420.47	0	0	7587.99	7535.39	2083.65	0	0		8808.27	72.3485	100	100	BioE_COM-S	72.3485	2420.47	6387.81	72.5205
MT	MT00	Malta	0	9	0	43.2432	43.2432	100	43.2432	100	43.2432	100	0	0	0	0		950.521	864.974	864.974	490.931	0	0	0	864.974	490.931	0	0	0		864.974	100	100	100		100	0	864.974	100
NL	NL11	Groningen	0	9	0	0	0	100	0	100	0	100	1	0	0	0		63.2083	57.5195	57.5195	57.5195	0	0	0	56.9443	56.9443	0	0	0		57.5195	100	100	100		100	0	57.5195	100
NL	NL12	Friesland (NL)	0	9	0	0	0	100	0	100	0	100	1	0	0	0		75.3433	68.5624	68.5624	68.5624	0	0	0	67.8768	67.8768	0	0	0		68.5624	100	100	100		100	0	68.5624	100
NL	NL13	Drenthe	0	9	0	0	0	100	0	100	0	100	1	0	0	0		15.3323	13.9524	13.9524	13.9524	0	0	0	13.8129	13.8129	0	0	0		13.9524	100	100	100		100	0	13.9524	100
NL	NL21	Overijssel	0	9	0	0	0	100	0	100	0	100	1	0	0	0		107.761	98.0627	98.0627	98.0627	0	0	0	97.082	97.082	0	0	0		98.0627	100	100	100		100	0	98.0627	100
NL	NL22	Gelderland	0	9	0	2.57937	2.57937	44.7581	2.57937	73.7903	2.57937	100	1	1.19048	1.222	1.2959		8015.3	7293.92	7293.92	7105.78	3925.37	1862.4	0	7135.02	6948.76	3838.63	1821.25	0		7293.92	44.7581	73.7903	100	BioE_COM-S	44.7581	3925.37	3368.55	46.183
NL	NL23	Flevoland	0	9	0	0	0	69.4184	0	100	0	100	1	6.38298	6.38298	6.38298		2165.85	1970.92	1970.92	1970.92	602.739	0	0	1826.66	1826.66	558.623	0	0		1970.92	100	100	100	BioE_COM-S	69.4184	602.739	1368.18	69.4184
NL	NL31	Utrecht	0	9	0	1.59574	1.59574	18.9189	1.59574	100	1.59574	100	1	1.59574	1.62162	1.69492		3019.48	2747.72	2747.72	2703.88	2192.33	0	0	2676.84	2633.43	2135.21	0	0		2747.72	18.9189	100	100	BioE_COM-S	18.9189	2192.33	555.391	20.2128
NL	NL32	Noord-Holland	0	9	0	1.17647	1.17647	14.1176	1.17647	100	1.17647	100	1	2.35294	2.38095	2.5974		1312.46	1194.34	1194.34	1180.29	1013.66	0	0	1154.57	1140.66	979.627	0	0		1194.34	14.1176	100	100	BioE_COM-S	14.1176	1013.66	180.68	15.128
NL	NL33	Zuid-Holland	0	9	0	1.9802	1.9802	6.25	1.9802	100	1.9802	100	1	0	0	0		1563.15	1422.47	1422.47	1394.3	1307.16	0	0	1408.24	1380.36	1294.09	0	0		1422.47	6.25	100	100	BioE_COM-S	6.25	1307.16	115.312	8.10644
NL	NL34	Zeeland	0.37594	9	0	0.753769	0.753769	46.9925	0.753769	100	0.753769	100	1	0	0	0		7951.14	7208.34	7208.34	7154	3792.16	0	0	7136.25	7082.46	3754.24	0	0		7208.34	46.9925	100	100	BioE_COM-S	46.9925	3792.16	3416.18	47.392
NL	NL41	Noord-Brabant	0	9	0	0.78125	0.78125	100	0.78125	100	0.78125	100	1	3.90625	3.93701	4.06504		2314.91	2106.57	2106.57	2090.11	0	0	0	2004.04	1987.74	0	0	0		2106.57	100	100	100		100	0	2106.57	100
NL	NL42	Limburg (NL)	0	9	0	0.97561	0.97561	7.85714	0.97561	100	0.97561	100	1	1.46341	1.47783	1.53846		4204.38	3825.99	3825.99	3788.66	3490.98	0	0	3732.3	3695.34	3404.99	0	0		3825.99	7.85714	100	100	BioE_COM-S	7.85714	3490.98	335.007	8.7561
PL	PL11	Lodzkie	0	9	0	3.61272	3.61272	5.74253	3.61272	8.755	3.61272	18.8515	4	5.09393	5.24738	5.93183		67810.8	61707.8	61707.8	59478.5	56062.9	54271.2	48265.9	56221.9	54103.1	50996.3	49366.4	43903.9		61707.8	5.74253	8.755	18.8515	BioE_COM-S	5.74253	56062.9	5644.9	9.14778
PL	PL12	Mazowieckie	0	9	0	4.04858	4.04858	3.35825	4.04858	7.10217	4.04858	6.84704	4	3.63216	3.77336	4.37805		208474	189711	189711	182031	175918	169103	169567	175508	168156	162509	156213	156642		189711	3.35825	7.10217	6.84704	BioE_COM-S	3.35825	175918	13793.7	7.27087
PL	PL21	Malopolskie	0	9	0	15.9615	15.9615	17.8306	15.9615	59.4354	15.9615	100	4	13.8462	16.1327	23.6486		21595.4	19651.8	19651.8	16515.1	13570.3	6699.28	0	16253.6	13296.7	10925.8	5393.77	0		19651.8	17.8306	59.4354	100	BioE_COM-S	17.8306	13570.3	6081.47	30.9461
PL	PL22	Slaskie	0	9	0	18.8571	18.8571	25.9843	18.8571	100	18.8571	100	4	6.85714	8.4507	9		3686.62	3354.82	3354.82	2722.2	2014.86	0	0	2999.79	2392.47	1770.8	0	0		3354.82	25.9843	100	100	BioE_COM-S	25.9843	2014.86	1339.97	39.9415
PL	PL31	Lubelskie	0	9	0	6.3244	6.3244	9.04847	6.3244	17.3788	6.3244	21.6517	4	20.1265	21.247	25.6743		62358.8	56746.5	56746.5	53157.6	48347.7	43919.5	41648.1	43512.4	40188.7	36552.2	33204.4	31487.2		56746.5	9.04847	17.3788	21.6517	BioE_COM-S	9.04847	48347.7	8398.84	14.8006
PL	PL32	Podkarpackie	0	9	0	24.6032	24.6032	48.7719	24.6032	95.0877	24.6032	91.5789	4	49.0079	63.4211	99		11358.8	10336.5	10336.5	7793.42	3992.42	382.835	656.288	5059.98	2736.72	1401.97	134.435	230.461		10336.5	48.7719	95.0877	91.5789	BioE_COM-S	48.7719	3992.42	6344.12	61.3757
PL	PL33	Swietokrzyskie	0	9	0	9.10683	9.10683	2.99658	9.10683	6.91353	9.10683	10.4024	4	4.7986	5.16378	6.69035		65844	59918.1	59918.1	54461.4	52829.4	50696.2	48796.1	54761.1	49583.2	48097.4	46155.2	44425.3		59918.1	2.99658	6.91353	10.4024	BioE_COM-S	2.99658	52829.4	7088.61	11.8305
PL	PL34	Podlaskie	0	9	0	4.80349	4.80349	49.4505	4.80349	100	4.80349	100	4	67.2489	70.1835	74.7423		4440.8	4041.13	4041.13	3847.01	1944.64	0	0	1270.57	1101.16	556.632	0	0		4041.13	49.4505	100	100	BioE_COM-S	49.4505	1944.64	2096.49	51.8787
PL	PL41	Wielkopolskie	0	9	0	5.17359	5.17359	5.4883	5.17359	24.0517	5.17359	56.0129	4	27.9101	29.3611	33.3884		36653.5	33354.7	33354.7	31629	29893.1	24021.7	13912.7	23083.5	21448.7	20271.5	16289.9	9434.66		33354.7	5.4883	24.0517	56.0129	BioE_COM-S	5.4883	29893.1	3461.53	10.3779
PL	PL42	Zachodniopomorskie	0.724638	9	0	1.66016	1.66016	9.05797	1.66016	100	1.66016	100	4	100	100	100		23801.8	21502.7	21502.7	21145.7	19230.3	0	0	0	0	0	0	0		21502.7	9.05797	100	100	BioE_COM-S	9.05797	19230.3	2272.35	10.5678
PL	PL43	Lubuskie	0	9	0	3.43915	3.43915	16.6065	3.43915	100	3.43915	100	4	100	100	100		9619.45	8753.7	8753.7	8452.64	7048.96	0	0	0	0	0	0	0		8753.7	16.6065	100	100	BioE_COM-S	16.6065	7048.96	1704.74	19.4745
PL	PL51	Dolnoslaskie	0	9	0	8.44749	8.44749	23.0228	8.44749	75.3954	8.44749	100	4	46.5753	50.6234	58.4795		8544.3	7775.32	7775.32	7118.5	5479.62	1751.48	0	3987.78	3374.27	2597.42	830.226	0		7775.32	23.0228	75.3954	100	BioE_COM-S	23.0228	5479.62	2295.7	29.5255
PL	PL52	Opolskie	0	9	0	7.76699	7.76699	45.9016	7.76699	100	7.76699	100	4	35.9223	38.9474	43.3735		2374.69	2160.97	2160.97	1993.12	1078.25	0	0	1329.31	1168.18	631.967	0	0		2160.97	45.9016	100	100	BioE_COM-S	45.9016	1078.25	1082.72	50.1035
PL	PL61	Kujawsko-Pomorskie	0	9	0	5.67823	5.67823	43.254	5.67823	100	5.67823	100	4	21.6088	22.9097	26.0194		14431.9	13133	13133	12387.3	7029.28	0	0	9883.3	9167.41	5202.14	0	0		13133	43.254	100	100	BioE_COM-S	43.254	7029.28	6103.71	46.4761
PL	PL62	Warminsko-Mazurskie	0	9	0	2.52874	2.52874	0	2.52874	100	2.52874	100	4	100	100	100		8994.28	8184.79	8184.79	7977.82	7977.82	0	0	0	0	0	0	0		8184.79	0	100	100	BioE_COM-S	0	7977.82	206.972	2.52874
PL	PL63	Pomorskie	0	9	0	2.95699	2.95699	26.9565	2.95699	100	2.95699	100	4	38.172	39.0582	41.1243		6505.71	5920.19	5920.19	5745.13	4196.44	0	0	3513.92	3361.14	2455.09	0	0		5920.19	26.9565	100	100	BioE_COM-S	26.9565	4196.44	1723.75	29.1164
PT	PT11	Norte	0.85056	9	0	8.51466	8.51466	8.43347	8.51466	15.4407	8.51466	7.30937	0	19.5837	21.4064	26.8874		21674.7	19556.2	19556.2	17891	16382.2	15128.5	16583.3	15726.4	14061.2	12875.4	11890.1	13033.4		19556.2	8.43347	15.4407	7.30937	BioE_COM-L	7.30937	16583.3	2972.87	15.2017
PT	PT15	Algarve	0.325504	9	0	12.5698	12.5698	9.20347	12.5698	23.7171	12.5698	21.5216	0	4.18994	4.79233	6.19835		5680.14	5152.11	5152.11	4504.49	4089.92	3436.16	3535.06	4936.24	4288.62	3893.92	3271.49	3365.64		5152.11	9.20347	23.7171	21.5216	BioE_COM-S	9.20347	4089.92	1062.18	20.6164
PT	PT16	Centro (P)	0.11461	9	0	8.62676	8.62676	30.1647	8.62676	56.2411	8.62676	34.862	0	2.68486	2.93834	3.57995		43856.1	39863.4	39863.4	36424.4	25437.1	15938.9	23726.1	38793.1	35354.2	24689.7	15470.6	23029		39863.4	30.1647	56.2411	34.862	BioE_COM-S	30.1647	25437.1	14426.2	36.1893
PT	PT17	Centro (P)	0	9	0	21.2598	21.2598	22.1436	21.2598	41.9172	21.2598	56.7386	0	0	0	0		3509.07	3193.25	3193.25	2514.37	1957.6	1460.42	1087.75	3193.25	2514.37	1957.6	1460.42	1087.75		3193.25	22.1436	41.9172	56.7386	BioE_COM-S	22.1436	1957.6	1235.65	38.6958
PT	PT18	Centro (P)	0	9	0	4.74684	4.74684	22.2425	4.74684	40.866	4.74684	22.3361	0	30.0633	31.5615	34.1727		5950.65	5415.09	5415.09	5158.05	4010.77	3050.16	4005.94	3787.14	3530.09	2744.91	2087.48	2741.61		5415.09	22.2425	40.866	22.3361	BioE_COM-S	22.2425	4010.77	1404.33	25.9336
PT	PT20	RegiÒo Aut¾noma dos Aþores	2.66667	9	0	48.1481	48.1481	100	48.1481	100	48.1481	100	0	0	0	0		1017.88	901.569	901.569	467.48	0	0	0	901.569	467.48	0	0	0		901.569	100	100	100		100	0	901.569	100
PT	PT30	RegiÒo Aut¾noma da Madeira	25.1309	9	0	88.4956	88.4956	59.6859	88.4956	100	88.4956	100	0	3.53982	15.3846	33.3333		3164	2155.66	2155.66	247.996	99.9776	0	0	2079.35	209.843	84.5964	0	0		2155.66	59.6859	100	100	BioE_COM-S	59.6859	99.9776	2055.68	95.3621
RO	RO11	Nord-Vest	0	9	0	22.3058	22.3058	64.1074	22.3058	85.414	22.3058	90.073	5	0	0	0		68158.7	62024.4	62024.4	48189.4	17296.4	7028.89	4783.78	58923.2	45779.9	16431.6	6677.45	4544.59		62024.4	64.1074	85.414	90.073	BioE_COM-S	64.1074	17296.4	44728	72.1135
RO	RO12	Centru	0.0448511	9	0	10.453	10.453	92.6444	10.453	100	10.453	100	5	5.57491	6.22568	7.10059		18000.8	16373.4	16373.4	14661.9	1078.47	0	0	14687.6	13061.6	960.759	0	0		16373.4	92.6444	100	100	BioE_COM-S	92.6444	1078.47	15294.9	93.4133
RO	RO21	Nord-Est	0	9	0	20.5809	20.5809	78.7461	20.5809	100	20.5809	100	5	0	0	0		28923.6	26320.5	26320.5	20903.5	4442.81	0	0	25004.5	19858.3	4220.67	0	0		26320.5	78.7461	100	100	BioE_COM-S	78.7461	4442.81	21877.7	83.1203
RO	RO22	Sud-Est	0.0149629	9	0	16.8262	16.8262	46.4927	16.8262	75.8828	16.8262	60.9917	5	0	0	0		26070.2	23720.3	23720.3	19729.1	10556.5	4758.11	7695.98	22534.3	18742.7	10028.7	4520.2	7311.19		23720.3	46.4927	75.8828	60.9917	BioE_COM-S	46.4927	10556.5	13163.8	55.4959
RO	RO31	Sud - Muntenia	0	9	0	44.4741	44.4741	43.8393	44.4741	54.2651	44.4741	43.3466	5	0	0	0		90862.3	82684.7	82684.7	45911.4	25784.2	20997.5	26010.4	78550.4	43615.8	24495	19947.7	24709.9		82684.7	43.8393	54.2651	43.3466	BioE_COM-L	43.3466	26010.4	56674.3	68.5427
RO	RO32	Bucuresti - Ilfov	0	9	0	11.8644	11.8644	100	11.8644	100	11.8644	100	5	0	0	0		1589.37	1446.32	1446.32	1274.72	0	0	0	1374.01	1210.99	0	0	0		1446.32	100	100	100		100	0	1446.32	100
RO	RO41	Sud-Vest Oltenia	0.0152151	9	0	29.0041	29.0041	71.3499	29.0041	83.3029	29.0041	79.8339	5	0	0	0		55572.6	50563.3	50563.3	35897.9	10284.8	5993.9	7239.22	48035.2	34103	9770.55	5694.21	6877.26		50563.3	71.3499	83.3029	79.8339	BioE_COM-S	71.3499	10284.8	40278.6	79.6596
RO	RO42	Vest	0.17963	9	0	5.48847	5.48847	64.9123	5.48847	89.306	5.48847	93.6171	5	0	0	0		47246.2	42916.8	42916.8	40561.3	14232	4337.61	2588.97	40770.9	38533.2	13520.4	4120.73	2459.52		42916.8	64.9123	89.306	93.6171	BioE_COM-S	64.9123	14232	28684.7	66.8381
SE	SE11	Stockholm	0	9	0	0	0	100	0	100	0	100	1	50	50	50		30	27.3	27.3	27.3	0	0	0	13.5135	13.5135	0	0	0		27.3	100	100	100		100	0	27.3	100
SE	SE12	Ostra Mellansverige	0	9	0	0	0	100	0	100	0	100	1	25	25	25		45	40.95	40.95	40.95	0	0	0	30.4054	30.4054	0	0	0		40.95	100	100	100		100	0	40.95	100
SE	SE21	SmÕland med oarna	0	9	0	0	0	100	0	100	0	100	1	18.1818	18.1818	20		180	163.8	163.8	163.8	0	0	0	132.678	132.678	0	0	0		163.8	100	100	100		100	0	163.8	100
SE	SE22	Sydsverige	0.283286	9	0	0.636943	0.636943	46.4589	0.636943	100	0.636943	100	1	4.4586	4.48718	4.79452		2409.23	2186.18	2186.18	2172.26	1163.05	0	0	2067.82	2054.04	1099.75	0	0		2186.18	46.4589	100	100	BioE_COM-S	46.4589	1163.05	1023.13	46.7999
SE	SE23	Võstsverige	0	9	0	0	0	100	0	100	0	100	1	33.3333	33.3333	36.3636		180.219	163.999	163.999	163.999	0	0	0	108.24	108.24	0	0	0		163.999	100	100	100		100	0	163.999	100
SE	SE31	Norra Mellansverige	0	9	0	0	0	100	0	100	0	100	1	0	0	0		0	0	0	0	0	0	0	0	0	0	0	0		0	100	100	100		0	0	0	0
SE	SE32	Mellersta Norrland	0	9	0	0	0	100	0	100	0	100	1	0	0	0		0	0	0	0	0	0	0	0	0	0	0	0		0	100	100	100		0	0	0	0
SE	SE33	Ovre Norrland	0	9	0	0	0	100	0	100	0	100	1	0	0	0		0	0	0	0	0	0	0	0	0	0	0	0		0	100	100	100		0	0	0	0
SI	SI03	Vzhodna Slovenija	0.652316	9	0	10.8397	10.8397	55.3164	10.8397	90.0848	10.8397	100	0.5	9.61832	10.274	10.7527		15681	14176.6	14176.6	12639.9	5647.97	1253.27	0	12749	11284.6	5042.36	1118.89	0		14176.6	55.3164	90.0848	100	BioE_COM-S	55.3164	5647.97	8528.64	60.1599
SI	SI04	Zahodna Slovenija	0.694444	9	0	17.3684	17.3684	36.0243	17.3684	57.2917	17.3684	48.2639	0.5	8.42105	9.55414	12.1739		4250.05	3840.69	3840.69	3173.62	2030.35	1355.4	1641.91	3499.68	2856.06	1827.18	1219.77	1477.61		3840.69	36.0243	57.2917	48.2639	BioE_COM-S	36.0243	2030.35	1810.34	47.1359
SK	SK01	Bratislavsky	0	9	0	0	0	62.6523	0	100	0	100	15	0	0	0		827.227	752.777	752.777	752.777	281.145	0	0	639.86	639.86	238.973	0	0		752.777	100	100	100	BioE_COM-S	62.6523	281.145	471.632	62.6523
SK	SK02	Zapadne Slovensko	0	9	0	1.26582	1.26582	94.5463	1.26582	100	1.26582	100	15	12.4473	12.6068	12.854		11468.8	10436.6	10436.6	10304.5	561.973	0	0	7766.92	7654.63	417.457	0	0		10436.6	94.5463	100	100	BioE_COM-S	94.5463	561.973	9874.66	94.6154
SK	SK03	Stredne Slovensko	0	9	0	1.75439	1.75439	100	1.75439	100	1.75439	100	15	45.614	46.4286	50		1070.39	974.059	974.059	956.97	0	0	0	450.288	435.763	0	0	0		974.059	100	100	100		100	0	974.059	100
SK	SK04	Vychodne Slovensko	0.157853	9	0	1.1236	1.1236	99.7632	1.1236	100	1.1236	100	15	0	0	0		1908.73	1734.2	1734.2	1714.72	4.06011	0	0	1474.07	1457.51	3.45109	0	0		1734.2	99.7632	100	100	BioE_COM-S	99.7632	4.06011	1730.14	99.7659
UK	UKC1	Tees Valley and Durham	0.157853	9	0	0	0	99.7632	0	100	0	100	1	0	0	0		0	0	0	0	0	0	0	0	0	0	0	0		0	100	100	100		0	0	0	0
UK	UKC2	Northumberland and Tyne and Wear	0.157853	9	0	0	0	99.7632	0	100	0	100	1	0	0	0		0	0	0	0	0	0	0	0	0	0	0	0		0	100	100	100		0	0	0	0
UK	UKD1	Cumbria	0.157853	9	0	0	0	99.7632	0	100	0	100	1	0	0	0		60	54.5138	54.5138	54.5138	0.129078	0	0	53.9687	53.9687	0.127787	0	0		54.5138	100	100	100	BioE_COM-S	99.7632	0.129078	54.3847	99.7632
UK	UKD3	Greater Manchester	0.157853	9	0	0	0	99.7632	0	100	0	100	1	0	0	0		0	0	0	0	0	0	0	0	0	0	0	0		0	100	100	100		0	0	0	0
UK	UKD4	Lancashire	0.157853	9	0	0	0	99.7632	0	100	0	100	1	0	0	0		30	27.2569	27.2569	27.2569	0.0645388	0	0	26.9843	26.9843	0.0638935	0	0		27.2569	100	100	100	BioE_COM-S	99.7632	0.0645388	27.1924	99.7632
UK	UKD6	Cheshire	0.157853	9	0	0	0	99.7632	0	100	0	100	1	0	0	0		0	0	0	0	0	0	0	0	0	0	0	0		0	100	100	100		0	0	0	0
UK	UKD7	Merseyside	0.157853	9	0	0	0	99.7632	0	100	0	100	1	0	0	0		0	0	0	0	0	0	0	0	0	0	0	0		0	100	100	100		0	0	0	0
UK	UKE1	East Yorkshire and Northern Lincolnshire	0.157853	9	0	0	0	99.7632	0	100	0	100	1	0	0	0		15	13.6285	13.6285	13.6285	0.0322694	0	0	13.4922	13.4922	0.0319467	0	0		13.6285	100	100	100	BioE_COM-S	99.7632	0.0322694	13.5962	99.7632
UK	UKE2	North Yorkshire	0.157853	9	0	0	0	99.7632	0	100	0	100	1	0	0	0		45	40.8854	40.8854	40.8854	0.0968083	0	0	40.4765	40.4765	0.0958402	0	0		40.8854	100	100	100	BioE_COM-S	99.7632	0.0968083	40.7886	99.7632
UK	UKE3	South Yorkshire	0.157853	9	0	0	0	99.7632	0	100	0	100	1	0	0	0		15	13.6285	13.6285	13.6285	0.0322694	0	0	13.4922	13.4922	0.0319467	0	0		13.6285	100	100	100	BioE_COM-S	99.7632	0.0322694	13.5962	99.7632
UK	UKE4	West Yorkshire	0.157853	9	0	0	0	99.7632	0	100	0	100	1	0	0	0		0	0	0	0	0	0	0	0	0	0	0	0		0	100	100	100		0	0	0	0
UK	UKF1	Derbyshire and Nottinghamshire	0	9	0	0	0	100	0	100	0	100	1	0	0	0		75	68.25	68.25	68.25	0	0	0	67.5675	67.5675	0	0	0		68.25	100	100	100		100	0	68.25	100
UK	UKF2	Leicestershire, Rutland and Northamptonshire	0	9	0	0	0	100	0	100	0	100	1	0	0	0		105.325	95.8453	95.8453	95.8453	0	0	0	94.8868	94.8868	0	0	0		95.8453	100	100	100		100	0	95.8453	100
UK	UKF3	Lincolnshire	0	9	0	0	0	100	0	100	0	100	1	0	0	0		60.39	54.9549	54.9549	54.9549	0	0	0	54.4054	54.4054	0	0	0		54.9549	100	100	100		100	0	54.9549	100
UK	UKG1	Herefordshire, Worcestershire and Warwickshire	0	9	0	0.166113	0.166113	100	0.166113	100	0.166113	100	1	4.98339	4.99168	5.09338		9078.4	8261.35	8261.35	8247.62	0	0	0	7771.15	7757.57	0	0	0		8261.35	100	100	100		100	0	8261.35	100
UK	UKG2	Shropshire and Staffordshire	0	9	0	8.33333	8.33333	100	8.33333	100	8.33333	100	1	0	0	0		180	163.8	163.8	150.15	0	0	0	162.162	148.649	0	0	0		163.8	100	100	100		100	0	163.8	100
UK	UKG3	West Midlands	0	9	0	0	0	100	0	100	0	100	1	0	0	0		0	0	0	0	0	0	0	0	0	0	0	0		0	100	100	100		0	0	0	0
UK	UKH1	East Anglia	0	9	0	0.555556	0.555556	100	0.555556	100	0.555556	100	1	7.77778	7.82123	8.09249		2766.31	2517.34	2517.34	2503.36	0	0	0	2298.33	2284.49	0	0	0		2517.34	100	100	100		100	0	2517.34	100
UK	UKH2	Bedfordshire and Hertfordshire	0	9	0	0	0	100	0	100	0	100	1	0	0	0		155.032	141.079	141.079	141.079	0	0	0	139.668	139.668	0	0	0		141.079	100	100	100		100	0	141.079	100
UK	UKH3	Essex	0	9	0	0	0	100	0	100	0	100	1	0	0	0		589.116	536.096	536.096	536.096	0	0	0	530.735	530.735	0	0	0		536.096	100	100	100		100	0	536.096	100
UK	UKI3	Inner London	0	9	0	0	0	100	0	100	0	100	1	0	0	0		0	0	0	0	0	0	0	0	0	0	0	0		0	100	100	100		0	0	0	0
UK	UKI4	Inner London	0	9	0	0	0	100	0	100	0	100	1	0	0	0		0	0	0	0	0	0	0	0	0	0	0	0		0	100	100	100		0	0	0	0
UK	UKI5	Outer London	0	9	0	0	0	100	0	100	0	100	1	0	0	0		0	0	0	0	0	0	0	0	0	0	0	0		0	100	100	100		0	0	0	0
UK	UKI6	Outer London	0	9	0	0	0	100	0	100	0	100	1	0	0	0		0	0	0	0	0	0	0	0	0	0	0	0		0	100	100	100		0	0	0	0
UK	UKI7	Outer London	0	9	0	0	0	100	0	100	0	100	1	0	0	0		0	0	0	0	0	0	0	0	0	0	0	0		0	100	100	100		0	0	0	0
UK	UKJ1	Berkshire, Buckinghamshire and Oxfordshire	0	9	0	0	0	100	0	100	0	100	1	0	0	0		92.0421	83.7583	83.7583	83.7583	0	0	0	82.9208	82.9208	0	0	0		83.7583	100	100	100		100	0	83.7583	100
UK	UKJ2	Berkshire, Buckinghamshire and Oxfordshire	0	9	0	0	0	41.8605	0	100	0	100	1	17.1053	17.1053	17.3333		1446.3	1316.14	1316.14	1316.14	765.195	0	0	1080.1	1080.1	627.963	0	0		1316.14	100	100	100	BioE_COM-S	41.8605	765.195	550.94	41.8605
UK	UKJ3	Hampshire and Isle of Wight	0	9	0	0	0	100	0	100	0	100	1	0	0	0		474.868	432.129	432.129	432.129	0	0	0	427.808	427.808	0	0	0		432.129	100	100	100		100	0	432.129	100
UK	UKJ4	Hampshire and Isle of Wight	0	9	0	0.111359	0.111359	0	0.111359	0	0.111359	0	1	4.5657	4.57079	4.60157		14571.8	13260.3	13260.3	13245.6	13245.6	13245.6	13245.6	12528.4	12513.7	12513.7	12513.7	12513.7		13260.3	0	0	0	BioE_COM-S & BioE_COM-M & BioE_COM-L	0	13245.6	14.7665	0.111359
UK	UKK1	Gloucestershire, Wiltshire and Bristol/Bath area	0	9	0	1.04167	1.04167	0	1.04167	0	1.04167	0	1	2.08333	2.10526	2.24719		1464.06	1332.3	1332.3	1318.42	1318.42	1318.42	1318.42	1291.49	1277.76	1277.76	1277.76	1277.76		1332.3	0	0	0	BioE_COM-S & BioE_COM-M & BioE_COM-L	0	1318.42	13.8781	1.04167
UK	UKK2	Dorset and Somerset	0	9	0	0.819672	0.819672	0	0.819672	100	0.819672	100	1	4.91803	4.95868	5.26316		1833.44	1668.43	1668.43	1654.75	1654.75	0	0	1570.51	1556.97	1556.97	0	0		1668.43	0	100	100	BioE_COM-S	0	1654.75	13.6756	0.819672
UK	UKK3	Cornwall and Isles of Scilly	0	9	0	0	0	0	0	100	0	100	1	7.14286	7.14286	7.69231		210	191.1	191.1	191.1	191.1	0	0	175.675	175.675	175.675	0	0		191.1	100	100	100	BioE_COM-S	0	191.1	0	0
UK	UKK4	Devon	0	9	0	1.44928	1.44928	0	1.44928	100	1.44928	100	1	11.5942	11.7647	12.3077		1020	928.2	928.2	914.748	914.748	0	0	812.377	799.059	799.059	0	0		928.2	0	100	100	BioE_COM-S	0	914.748	13.4522	1.44928
UK	UKL1	West Wales and The Valleys	10.4895	9	0	0	0	100	0	100	0	100	1	14.2857	14.2857	14.2857		90	73.3091	73.3091	73.3091	0	0	0	62.208	62.208	0	0	0		73.3091	100	100	100		100	0	73.3091	100
UK	UKL2	East Wales	10.4895	9	0	0	0	100	0	100	0	100	1	0	0	0		525	427.636	427.636	427.636	0	0	0	423.36	423.36	0	0	0		427.636	100	100	100		100	0	427.636	100
UK	UKM2	Eastern Scotland	10.4895	9	0	0	0	100	0	100	0	100	1	0	0	0		0	0	0	0	0	0	0	0	0	0	0	0		0	100	100	100		0	0	0	0
UK	UKM3	South Western Scotland	10.4895	9	0	0	0	100	0	100	0	100	1	0	0	0		15	12.2182	12.2182	12.2182	0	0	0	12.096	12.096	0	0	0		12.2182	100	100	100		100	0	12.2182	100
UK	UKM5	North Eastern Scotland	10.4895	9	0	0	0	100	0	100	0	100	1	0	0	0		0	0	0	0	0	0	0	0	0	0	0	0		0	100	100	100		0	0	0	0
UK	UKM6	Highlands and Islands	10.4895	9	0	0	0	100	0	100	0	100	1	0	0	0		0	0	0	0	0	0	0	0	0	0	0	0		0	100	100	100		0	0	0	0
UK	UKN0	Northern Ireland	10.4895	9	0	0.657895	0.657895	100	0.657895	100	0.657895	100	1	0	0	0		0	0	0	0	0	0	0	0	0	0	0	0		0	100	100	100		0	0	0	0

## Sheet: DryFruits
DRY FRUITS			CRT_SLOPE	CRT_LOSS	CRE_WASTE	CRE_SELF	CRE_>2ha	CRE_COM-S	CRE_>2ha	CRE_COM-M	CRE_>2ha	CRE_COM-L	CRI_COMP	CRI_>0ha	CRI_>2ha	CRI_>5ha		BioTH	BioT	BioE_WASTE	BioE_SELF	BioE_COM-S	BioE_COM-M	BioE_COM-L	BioI_WASTE	BioI_SELF	BioI_COM-S	BioI_COM-M	BioI_COM-L		BioT	CRE_COM			Best economic case	CR BEST Economic	BioE_COM_BEST	GAP = BioT - BioE_COM_BEST
Country	NUTs2	NAME	(%)	(%)	(%)	(%)	(%)	(%)	(%)	(%)	(%)	(%)	(%)	(%)	(%)	(%)		t DM·yr-1	t DM·yr-1	t DM·yr-1	t DM·yr-1	t DM·yr-1	t DM·yr-1	t DM·yr-1	t DM·yr-1	t DM·yr-1	t DM·yr-1	t DM·yr-1	t DM·yr-1		(DM t)	S	M	L		(%)	(DM t)	(DM t)	(%)
AT	AT11	Burgenland (A)	0	10	0	0	0	30.5769	0	72.6573	0	78.8112	0	0	0	0		0	0	0	0	0	0	0	0	0	0	0	0		0	100	100	100		0	0	0	0
AT	AT12	Nieder÷sterreich	0.0217628	10	0	0	0	32.4592	0	73.7106	0	74.3308	0	0	0	0		0	0	0	0	0	0	0	0	0	0	0	0		0	100	100	100		0	0	0	0
AT	AT13	Wien	0	10	0	0	0	100	0	100	0	100	0	0	0	0		0	0	0	0	0	0	0	0	0	0	0	0		0	100	100	100		0	0	0	0
AT	AT21	Kõrnten	0	10	0	0	0	100	0	100	0	100	0	0	0	0		0	0	0	0	0	0	0	0	0	0	0	0		0	100	100	100		0	0	0	0
AT	AT22	Steiermark	0	10	0	0	0	40.3194	0	99.8004	0	100	0	0	0	0		0	0	0	0	0	0	0	0	0	0	0	0		0	100	100	100		0	0	0	0
AT	AT31	Ober÷sterreich	0	10	0	0	0	40.3194	0	99.8004	0	100	0	0	0	0		0	0	0	0	0	0	0	0	0	0	0	0		0	100	100	100		0	0	0	0
AT	AT32	Salzburg	0	10	0	0	0	40.3194	0	99.8004	0	100	0	0	0	0		0	0	0	0	0	0	0	0	0	0	0	0		0	100	100	100		0	0	0	0
AT	AT33	Tirol	0	10	0	0	0	40.3194	0	99.8004	0	100	0	0	0	0		0	0	0	0	0	0	0	0	0	0	0	0		0	100	100	100		0	0	0	0
AT	AT34	Vorarlberg	0	10	0	0	0	40.3194	0	99.8004	0	100	0	0	0	0		0	0	0	0	0	0	0	0	0	0	0	0		0	100	100	100		0	0	0	0
BE	BE10	Region de Bruxelles-Capitalet	0	10	0	0	0	40.3194	0	99.8004	0	100	0	0	0	0		0	0	0	0	0	0	0	0	0	0	0	0		0	100	100	100		0	0	0	0
BE	BE21	Prov. Antwerpen	0	10	0	0	0	100	0	100	0	100	0	0	0	0		0	0	0	0	0	0	0	0	0	0	0	0		0	100	100	100		0	0	0	0
BE	BE22	Prov. Limburg (B)	0	10	0	0	0	2.92612	0	1.68252	0	0.877835	0	0	0	0		0	0	0	0	0	0	0	0	0	0	0	0		0	100	100	100		0	0	0	0
BE	BE23	Prov. Oost-Vlaanderen	0	10	0	0	0	100	0	100	0	100	0	0	0	0		0	0	0	0	0	0	0	0	0	0	0	0		0	100	100	100		0	0	0	0
BE	BE24	Prov. Vlaams-Brabant	0	10	0	0	0	12.2449	0	12.5	0	17.602	0	0	0	0		0	0	0	0	0	0	0	0	0	0	0	0		0	100	100	100		0	0	0	0
BE	BE25	Prov. West-Vlaanderen	0	10	0	0	0	100	0	100	0	100	0	0	0	0		0	0	0	0	0	0	0	0	0	0	0	0		0	100	100	100		0	0	0	0
BE	BE31	Prov. Brabant Wallon	0	10	0	0	0	100	0	100	0	100	0	0	0	0		0	0	0	0	0	0	0	0	0	0	0	0		0	100	100	100		0	0	0	0
BE	BE32	Prov. Hainaut	0	10	0	0	0	100	0	100	0	100	0	0	0	0		0	0	0	0	0	0	0	0	0	0	0	0		0	100	100	100		0	0	0	0
BE	BE33	Prov. LiÞge	0	10	0	0	0	58.5366	0	58.5366	0	42.6829	0	0	0	0		0	0	0	0	0	0	0	0	0	0	0	0		0	100	100	100		0	0	0	0
BE	BE34	Prov. Luxembourg (B)	0	10	0	0	0	58.5366	0	58.5366	0	42.6829	0	0	0	0		0	0	0	0	0	0	0	0	0	0	0	0		0	100	100	100		0	0	0	0
BE	BE35	Prov. Namur	0	10	0	0	0	100	0	100	0	100	0	0	0	0		0	0	0	0	0	0	0	0	0	0	0	0		0	100	100	100		0	0	0	0
BG	BG31	Severozapaden	0.0997133	10	0	20.6897	20.6897	100	20.6897	100	20.6897	100	2.5	0	0	0		524.104	471.223	471.223	373.729	0	0	0	459.442	364.385	0	0	0		471.223	100	100	100		100	0	471.223	100
BG	BG32	Severen tsentralen	0	10	0	6.52174	6.52174	97.6111	6.52174	100	6.52174	100	2.5	0	0	0		1661.36	1495.22	1495.22	1397.71	33.3897	0	0	1457.84	1362.77	32.555	0	0		1495.22	97.6111	100	100	BioE_COM-S	97.6111	33.3897	1461.83	97.7669
BG	BG33	Severoiztochen	0	10	0	5.58659	5.58659	99.9785	5.58659	100	5.58659	100	2.5	0	0	0		1454.86	1309.38	1309.38	1236.23	0.265228	0	0	1276.64	1205.32	0.258597	0	0		1309.38	99.9785	100	100	BioE_COM-S	99.9785	0.265228	1309.11	99.9797
BG	BG34	Yugoiztochen	0.185447	10	0	6.08696	6.08696	75.0088	6.08696	97.651	6.08696	99.7704	2.5	0	0	0		2839.19	2550.54	2550.54	2395.29	598.61	56.2651	5.4996	2486.77	2335.4	583.645	54.8585	5.36211		2550.54	75.0088	97.651	99.7704	BioE_COM-S	75.0088	598.61	1951.93	76.53
BG	BG41	Yugozapaden	0.178663	10	0	28.5714	28.5714	77.5651	28.5714	100	28.5714	100	2.5	0	0	0		122.82	110.34	110.34	78.8146	17.682	0	0	107.582	76.8442	17.2399	0	0		110.34	77.5651	100	100	BioE_COM-S	77.5651	17.682	92.6584	83.9751
BG	BG42	Yuzhen tsentralen	0.12842	10	0	12.5	12.5	68.3493	12.5	89.5979	12.5	100	2.5	0	0	0		1266.16	1138.08	1138.08	995.821	315.184	103.586	0	1109.63	970.926	307.305	100.996	0		1138.08	68.3493	89.5979	100	BioE_COM-S	68.3493	315.184	822.897	72.3056
CY	CY00	Kypros/Kibris	0.827433	10	0	46.9741	46.9741	35.4841	46.9741	64.7864	46.9741	57.3156	20	0	0	0		2978.18	2658.19	2658.19	1409.53	909.37	496.346	601.649	2126.55	1127.62	727.496	397.077	481.319		2658.19	35.4841	64.7864	57.3156	BioE_COM-S	35.4841	909.37	1748.82	65.7899
CZ	CZ01	Praha	0	10	0	0	0	100	0	100	0	100	0	0	0	0		0	0	0	0	0	0	0	0	0	0	0	0		0	100	100	100		0	0	0	0
CZ	CZ02	Stredni Cechy	0	10	0	0	0	71.5206	0	100	0	100	0	0	0	0		0	0	0	0	0	0	0	0	0	0	0	0		0	100	100	100		0	0	0	0
CZ	CZ03	Jihozapad	0	10	0	0	0	45.0207	0	100	0	100	0	0	0	0		0	0	0	0	0	0	0	0	0	0	0	0		0	100	100	100		0	0	0	0
CZ	CZ04	Severozapad	0	10	0	0	0	100	0	100	0	100	0	0	0	0		0	0	0	0	0	0	0	0	0	0	0	0		0	100	100	100		0	0	0	0
CZ	CZ05	Severovychod	0	10	0	0	0	61.7722	0	100	0	100	0	0	0	0		0	0	0	0	0	0	0	0	0	0	0	0		0	100	100	100		0	0	0	0
CZ	CZ06	Jihovychod	0	10	0	0	0	92.2699	0	100	0	100	0	0	0	0		0	0	0	0	0	0	0	0	0	0	0	0		0	100	100	100		0	0	0	0
CZ	CZ07	Stredni Morava	0	10	0	0	0	100	0	100	0	100	0	0	0	0		0	0	0	0	0	0	0	0	0	0	0	0		0	100	100	100		0	0	0	0
CZ	CZ08	Moravskoslezsko	0	10	0	0	0	100	0	100	0	100	0	0	0	0		0	0	0	0	0	0	0	0	0	0	0	0		0	100	100	100		0	0	0	0
DE	DE11	Stuttgart	0	10	0	7.14286	7.14286	70.0523	7.14286	100	7.14286	100	0.25	0	0	0		13.3405	12.0064	12.0064	11.1488	3.33881	0	0	11.9764	11.1209	3.33047	0	0		12.0064	70.0523	100	100	BioE_COM-S	70.0523	3.33881	8.66761	72.1914
DE	DE12	Karlsruhe	0	10	0	7.14	7.14	90.8028	7.14	97.6928	7.14	93.11	0.25	0	0	0		7.66323	6.89691	6.89691	6.40447	0.589033	0.147764	0.441269	6.87967	6.38846	0.587561	0.147395	0.440166		6.89691	90.8028	97.6928	93.11	BioE_COM-S	90.8028	0.589033	6.30788	91.4595
DE	DE13	Freiburg	0	10	0	7.14	7.14	14.2318	7.14	43.3704	7.14	46.7447	0.25	0	0	0		39.6845	35.7161	35.7161	33.1659	28.4458	18.7817	17.6626	35.6268	33.083	28.3747	18.7348	17.6185		35.7161	14.2318	43.3704	46.7447	BioE_COM-S	14.2318	28.4458	7.27025	20.3557
DE	DE14	Tübingen	0	10	0	7.14	7.14	33.8741	7.14	84.0363	7.14	95.7495	0.25	0	0	0		35.9184	32.3265	32.3265	30.0184	19.8499	4.79204	1.27593	32.2457	29.9434	19.8003	4.78006	1.27274		32.3265	33.8741	84.0363	95.7495	BioE_COM-S	33.8741	19.8499	12.4766	38.5955
DE	DE21	Oberbayern	0	10	0	0	0	100	0	100	0	100	0.25	0	0	0		99.1946	89.2751	89.2751	89.2751	0	0	0	89.0519	89.0519	0	0	0		89.2751	100	100	100		100	0	89.2751	100
DE	DE22	Niederbayern	0	10	0	0	0	100	0	100	0	100	0.25	0	0	0		42.6388	38.3749	38.3749	38.3749	0	0	0	38.2789	38.2789	0	0	0		38.3749	100	100	100		100	0	38.3749	100
DE	DE23	Oberpfalz	0	10	0	0	0	100	0	100	0	100	0.25	0	0	0		0	0	0	0	0	0	0	0	0	0	0	0		0	100	100	100		0	0	0	0
DE	DE24	Oberfranken	0	10	0	0	0	14.876	0	100	0	100	0.25	0	0	0		0	0	0	0	0	0	0	0	0	0	0	0		0	100	100	100		0	0	0	0
DE	DE25	Mittelfranken	0	10	0	0	0	100	0	100	0	100	0.25	0	0	0		31.3662	28.2296	28.2296	28.2296	0	0	0	28.159	28.159	0	0	0		28.2296	100	100	100		100	0	28.2296	100
DE	DE26	Unterfranken	0	10	0	0	0	62.2305	0	100	0	100	0.25	0	0	0		13.0794	11.7714	11.7714	11.7714	4.44601	0	0	11.742	11.742	4.43489	0	0		11.7714	100	100	100	BioE_COM-S	62.2305	4.44601	7.32542	62.2305
DE	DE27	Schwaben	0	10	0	0	0	0	0	36.5297	0	100	0.25	0	0	0		23.8994	21.5094	21.5094	21.5094	21.5094	13.6521	0	21.4556	21.4556	21.4556	13.618	0		21.5094	100	100	100	BioE_COM-S	0	21.5094	0	0
DE	DE30	Berlin	0	10	0	0	0	0	0	36.5297	0	100	0.25	0	0	0		0	0	0	0	0	0	0	0	0	0	0	0		0	100	100	100		0	0	0	0
DE	DE40	Brandenburg	0	10	0	0	0	32.6327	0	85.3982	0	100	0.25	0	0	0		0	0	0	0	0	0	0	0	0	0	0	0		0	100	100	100		0	0	0	0
DE	DE50	Bremen	0	10	0	0	0	32.6327	0	85.3982	0	100	0.25	0	0	0		0	0	0	0	0	0	0	0	0	0	0	0		0	100	100	100		0	0	0	0
DE	DE60	Hamburg	0	10	0	0	0	0	0	17.0029	0	3.45821	0.25	0	0	0		0	0	0	0	0	0	0	0	0	0	0	0		0	100	100	100		0	0	0	0
DE	DE71	Darmstadt	0	10	0	0	0	60.9778	0	59.8222	0	57.3333	0.25	0	0	0		7.70581	6.93523	6.93523	6.93523	2.70628	2.78642	2.95903	6.91789	6.91789	2.69952	2.77946	2.95163		6.93523	100	100	100	BioE_COM-L	57.3333	2.95903	3.9762	57.3333
DE	DE72	Gießen	0	10	0	0	0	100	0	100	0	100	0.25	0	0	0		0	0	0	0	0	0	0	0	0	0	0	0		0	100	100	100		0	0	0	0
DE	DE73	Kassel	0	10	0	0	0	100	0	100	0	100	0.25	0	0	0		0	0	0	0	0	0	0	0	0	0	0	0		0	100	100	100		0	0	0	0
DE	DE80	Mecklenburg-Vorpommern	0	10	0	0	0	78.1193	0	100	0	100	0.25	0	0	0		0	0	0	0	0	0	0	0	0	0	0	0		0	100	100	100		0	0	0	0
DE	DE91	Braunschweig	0	10	0	0	0	78.1193	0	100	0	100	0.25	0	0	0		0	0	0	0	0	0	0	0	0	0	0	0		0	100	100	100		0	0	0	0
DE	DE92	Hannover	0	10	0	0	0	78.1193	0	100	0	100	0.25	0	0	0		0	0	0	0	0	0	0	0	0	0	0	0		0	100	100	100		0	0	0	0
DE	DE93	Lüneburg	0	10	0	0	0	8.22245	0	10.8837	0	9.38246	0.25	0	0	0		0	0	0	0	0	0	0	0	0	0	0	0		0	100	100	100		0	0	0	0
DE	DE94	Weser-Ems	0	10	0	0	0	8.22245	0	10.8837	0	9.38246	0.25	0	0	0		0	0	0	0	0	0	0	0	0	0	0	0		0	100	100	100		0	0	0	0
DE	DEA1	Düsseldorf	0	10	0	0	0	100	0	100	0	100	0.25	0	0	0		0	0	0	0	0	0	0	0	0	0	0	0		0	100	100	100		0	0	0	0
DE	DEA2	Köln	0	10	0	0	0	11.2224	0	14.4289	0	100	0.25	0	0	0		7.01357	6.31221	6.31221	6.31221	5.60383	5.40143	0	6.29643	6.29643	5.58982	5.38793	0		6.31221	100	100	100	BioE_COM-S	11.2224	5.60383	0.708385	11.2224
DE	DEA3	Münster	0	10	0	0	0	11.2224	0	14.4289	0	100	0.25	0	0	0		0	0	0	0	0	0	0	0	0	0	0	0		0	100	100	100		0	0	0	0
DE	DEA4	Detmold	0	10	0	0	0	11.2224	0	14.4289	0	100	0.25	0	0	0		0	0	0	0	0	0	0	0	0	0	0	0		0	100	100	100		0	0	0	0
DE	DEA5	Arnsberg	0	10	0	0	0	11.2224	0	14.4289	0	100	0.25	0	0	0		0	0	0	0	0	0	0	0	0	0	0	0		0	100	100	100		0	0	0	0
DE	DEB1	Koblenz	0	10	0	0	0	92.1376	0	94.226	0	98.8943	0.25	0	0	0		0	0	0	0	0	0	0	0	0	0	0	0		0	100	100	100		0	0	0	0
DE	DEB2	Trier	0	10	0	0	0	100	0	100	0	100	0.25	0	0	0		0	0	0	0	0	0	0	0	0	0	0	0		0	100	100	100		0	0	0	0
DE	DEB3	Rheinhessen-Pfalz	0	10	0	0	0	3.80239	0	5.62862	0	2.35775	0.25	0	0	0		32.904	29.6136	29.6136	29.6136	28.4876	27.9468	28.9154	29.5396	29.5396	28.4164	27.8769	28.8431		29.6136	100	100	100	BioE_COM-L	2.35775	28.9154	0.698215	2.35775
DE	DEC0	Saarland	0	10	0	0	0	100	0	100	0	100	0.25	0	0	0		0	0	0	0	0	0	0	0	0	0	0	0		0	100	100	100		0	0	0	0
DE	DED2	Dresden	0	10	0	0	0	23.6559	0	23.8351	0	100	0.25	0	0	0		0	0	0	0	0	0	0	0	0	0	0	0		0	100	100	100		0	0	0	0
DE	DED4	Chemnitz	0	10	0	0	0	72.5664	0	100	0	100	0.25	0	0	0		0	0	0	0	0	0	0	0	0	0	0	0		0	100	100	100		0	0	0	0
DE	DED5	Leipzig	0	10	0	0	0	36.4662	0	100	0	100	0.25	0	0	0		0	0	0	0	0	0	0	0	0	0	0	0		0	100	100	100		0	0	0	0
DE	DEE0	Sachsen-Anhalt	0	10	0	0	0	84.9143	0	100	0	100	0.25	0	0	0		0	0	0	0	0	0	0	0	0	0	0	0		0	100	100	100		0	0	0	0
DE	DEF0	Schleswig-Holstein	0	10	0	0	0	24.6154	0	24.6154	0	24.6154	0.25	0	0	0		0	0	0	0	0	0	0	0	0	0	0	0		0	100	100	100		0	0	0	0
DE	DEG0	Thüringen	0	10	0	0	0	45.6897	0	100	0	100	0.25	0	0	0		0	0	0	0	0	0	0	0	0	0	0	0		0	100	100	100		0	0	0	0
DK	DK01	Hovedstaden	0	10	0	0	0	100	0	100	0	100	0.25	0	0	0		0	0	0	0	0	0	0	0	0	0	0	0		0	100	100	100		0	0	0	0
DK	DK02	Sjaelland	0	10	0	0	0	42	0	100	0	100	0.25	0	0	0		0	0	0	0	0	0	0	0	0	0	0	0		0	100	100	100		0	0	0	0
DK	DK03	Syddanmark	0	10	0	0	0	100	0	100	0	100	0.25	0	0	0		5.06876	4.56189	4.56189	4.56189	0	0	0	4.55048	4.55048	0	0	0		4.56189	100	100	100		100	0	4.56189	100
DK	DK04	Midtjylland	0	10	0	0	0	100	0	100	0	100	0.25	0	0	0		0	0	0	0	0	0	0	0	0	0	0	0		0	100	100	100		0	0	0	0
DK	DK05	Nordjylland	0	10	0	0	0	100	0	100	0	100	0.25	0	0	0		0	0	0	0	0	0	0	0	0	0	0	0		0	100	100	100		0	0	0	0
EE	EE00	Eesti	0	10	0	0	0	100	0	100	0	100	0	0	0	0		0	0	0	0	0	0	0	0	0	0	0	0		0	100	100	100		0	0	0	0
EL	EL30	Attiki	0	10	0	44.5652	44.5652	100	44.5652	100	44.5652	100	20	0	0	0		1097.78	988.002	988.002	547.697	0	0	0	790.401	438.157	0	0	0		988.002	100	100	100		100	0	988.002	100
EL	EL41	Voreio Aigaio	0	10	0	9.52381	9.52381	100	9.52381	100	9.52381	100	20	0	0	0		324.264	291.837	291.837	264.043	0	0	0	233.47	211.235	0	0	0		291.837	100	100	100		100	0	291.837	100
EL	EL42	Notio Aigaio	0	10	0	33.3333	33.3333	100	33.3333	100	33.3333	100	20	0	0	0		38.1699	34.3529	34.3529	22.9019	0	0	0	27.4823	18.3215	0	0	0		34.3529	100	100	100		100	0	34.3529	100
EL	EL43	Kriti	0	10	0	10.8696	10.8696	100	10.8696	100	10.8696	100	20	0	0	0		672.169	604.952	604.952	539.196	0	0	0	483.962	431.357	0	0	0		604.952	100	100	100		100	0	604.952	100
EL	EL51	Anatoliki Makedonia, Thraki	0	10	0	10.828	10.828	100	10.828	100	10.828	100	20	0	0	0		1318.47	1186.62	1186.62	1058.14	0	0	0	949.299	846.508	0	0	0		1186.62	100	100	100		100	0	1186.62	100
EL	EL52	Kentriki Makedonia	0	10	0	14.8064	14.8064	0	14.8064	0	14.8064	0	20	0	0	0		3505.28	3154.76	3154.76	2687.65	2687.65	2687.65	2687.65	2523.8	2150.12	2150.12	2150.12	2150.12		3154.76	0	0	0	BioE_COM-S & BioE_COM-M & BioE_COM-L	0	2687.65	467.105	14.8064
EL	EL53	Dytiki Makedonia	0	10	0	19.774	19.774	0	19.774	0	19.774	0	20	0	0	0		1337.94	1204.14	1204.14	966.036	966.036	966.036	966.036	963.315	772.829	772.829	772.829	772.829		1204.14	0	0	0	BioE_COM-S & BioE_COM-M & BioE_COM-L	0	966.036	238.108	19.774
EL	EL54	Ipeiros	0	10	0	46.3636	46.3636	0	46.3636	0	46.3636	0	20	0	0	0		784.106	705.695	705.695	378.509	378.509	378.509	378.509	564.556	302.808	302.808	302.808	302.808		705.695	0	0	0	BioE_COM-S & BioE_COM-M & BioE_COM-L	0	378.509	327.186	46.3636
EL	EL61	Thessalia	0	10	0	16.6056	16.6056	0	16.6056	0	16.6056	0	20	0	0	0		6124.35	5511.92	5511.92	4596.63	4596.63	4596.63	4596.63	4409.53	3677.3	3677.3	3677.3	3677.3		5511.92	0	0	0	BioE_COM-S & BioE_COM-M & BioE_COM-L	0	4596.63	915.288	16.6056
EL	EL62	Ionia Nisia	0	10	0	37.5	37.5	0	37.5	0	37.5	0	20	0	0	0		46.9872	42.2885	42.2885	26.4303	26.4303	26.4303	26.4303	33.8308	21.1443	21.1443	21.1443	21.1443		42.2885	0	0	0	BioE_COM-S & BioE_COM-M & BioE_COM-L	0	26.4303	15.8582	37.5
EL	EL63	Dytiki Ellada	0	10	0	28.9855	28.9855	0	28.9855	0	28.9855	0	20	0	0	0		1402.01	1261.81	1261.81	896.069	896.069	896.069	896.069	1009.45	716.855	716.855	716.855	716.855		1261.81	0	0	0	BioE_COM-S & BioE_COM-M & BioE_COM-L	0	896.069	365.742	28.9855
EL	EL64	Sterea Ellada	0	10	0	30.411	30.411	0	30.411	0	30.411	0	20	0	0	0		2310.74	2079.67	2079.67	1447.22	1447.22	1447.22	1447.22	1663.73	1157.78	1157.78	1157.78	1157.78		2079.67	0	0	0	BioE_COM-S & BioE_COM-M & BioE_COM-L	0	1447.22	632.447	30.411
EL	EL65	Peloponnisos	0	10	0	14.5455	14.5455	0	14.5455	0	14.5455	0	20	0	0	0		3540.14	3186.12	3186.12	2722.69	2722.69	2722.69	2722.69	2548.9	2178.15	2178.15	2178.15	2178.15		3186.12	0	0	0	BioE_COM-S & BioE_COM-M & BioE_COM-L	0	2722.69	463.436	14.5455
ES	ES11	Galicia	1.20846	10	0	10.8108	10.8108	29.3051	10.8108	51.5861	10.8108	99.7734	0	0	0	0		2678.25	2381.29	2381.29	2123.85	1501.46	1028.24	4.81236	2381.29	2123.85	1501.46	1028.24	4.81236		2381.29	29.3051	51.5861	99.7734	BioE_COM-S	29.3051	1501.46	879.836	36.9478
ES	ES12	Principado de Asturias	0	10	0	7.84314	7.84314	56.25	7.84314	100	7.84314	100	0	0	0	0		336.664	302.998	302.998	279.233	122.164	0	0	302.998	279.233	122.164	0	0		302.998	56.25	100	100	BioE_COM-S	56.25	122.164	180.833	59.6814
ES	ES13	Cantabria	0	10	0	0	0	56.25	0	100	0	100	0	0	0	0		41.3848	37.2463	37.2463	37.2463	16.2953	0	0	37.2463	37.2463	16.2953	0	0		37.2463	100	100	100	BioE_COM-S	56.25	16.2953	20.9511	56.25
ES	ES21	País Vasco	0	10	0	22.5806	22.5806	0.247001	22.5806	0	22.5806	0	0	0	0	0		234.886	211.397	211.397	163.662	163.258	163.662	163.662	211.397	163.662	163.258	163.662	163.662		211.397	0.247001	0	0	BioE_COM-M & BioE_COM-L	0	163.662	47.7348	22.5806
ES	ES22	Comunidad Foral de Navarra	0.0254453	10	0	8	8	20.9924	8	45.1908	8	37.659	0	0	0	0		2023.32	1820.52	1820.52	1674.88	1323.29	917.989	1044.14	1820.52	1674.88	1323.29	917.989	1044.14		1820.52	20.9924	45.1908	37.659	BioE_COM-S	20.9924	1323.29	497.239	27.313
ES	ES23	La Rioja	0.00898715	10	0	6.08828	6.08828	4.09814	6.08828	10.1735	6.08828	3.92738	0	0	0	0		4755.6	4279.66	4279.66	4019.1	3854.39	3610.22	3861.25	4279.66	4019.1	3854.39	3610.22	3861.25		4279.66	4.09814	10.1735	3.92738	BioE_COM-L	3.92738	3861.25	418.403	9.77655
ES	ES24	Arag¾n	0.0102912	10	0	2.2682	2.2682	13.0596	2.2682	28.9132	2.2682	30.0864	0	0	0	0		42844.2	38555.8	38555.8	37681.3	32760.3	26786.4	26344.3	38555.8	37681.3	32760.3	26786.4	26344.3		38555.8	13.0596	28.9132	30.0864	BioE_COM-S	13.0596	32760.3	5795.54	15.0316
ES	ES30	Comunidad de Madrid	0	10	0	2.32558	2.32558	46.3636	2.32558	59.8701	2.32558	40.4416	0	0	0	0		227.658	204.892	204.892	200.127	107.341	80.3107	119.192	204.892	200.127	107.341	80.3107	119.192		204.892	46.3636	59.8701	40.4416	BioE_COM-L	40.4416	119.192	85.6994	41.8266
ES	ES41	Castilla y Le¾n	0.22495	10	0	8.70787	8.70787	46.4876	8.70787	74.4199	8.70787	87.917	0	0	0	0		2200.05	1975.6	1975.6	1803.56	965.131	461.352	217.925	1975.6	1803.56	965.131	461.352	217.925		1975.6	46.4876	74.4199	87.917	BioE_COM-S	46.4876	965.131	1010.46	51.1474
ES	ES42	Castilla-La Mancha	0.0302138	10	0	2.30179	2.30179	20.4799	2.30179	38.1331	2.30179	24.2692	0	0	0	0		33251.6	29917.4	29917.4	29228.8	23242.8	18082.9	22135.2	29917.4	29228.8	23242.8	18082.9	22135.2		29917.4	20.4799	38.1331	24.2692	BioE_COM-S	20.4799	23242.8	6674.66	22.3103
ES	ES43	Extremadura	0.692464	10	0	2.15655	2.15655	10.6947	2.15655	25.1776	2.15655	16.9224	0	0	0	0		7341.15	6561.28	6561.28	6419.79	5733.21	4803.43	5333.4	6561.28	6419.79	5733.21	4803.43	5333.4		6561.28	10.6947	25.1776	16.9224	BioE_COM-S	10.6947	5733.21	828.076	12.6206
ES	ES51	Cataluña	0.328135	10	0	3.48641	3.48641	4.75202	3.48641	9.15614	3.48641	5.1276	0	0	0	0		38512.6	34547.6	34547.6	33343.1	31758.6	30290.2	31633.4	34547.6	33343.1	31758.6	30290.2	31633.4		34547.6	4.75202	9.15614	5.1276	BioE_COM-S	4.75202	31758.6	2788.94	8.07276
ES	ES52	Comunidad Valenciana	0.155739	10	0	4.9819	4.9819	52.3175	4.9819	69.1924	4.9819	58.2584	0	0	0	0		46537.8	41818.8	41818.8	39735.4	18946.8	12241.5	16586.2	41818.8	39735.4	18946.8	12241.5	16586.2		41818.8	52.3175	69.1924	58.2584	BioE_COM-S	52.3175	18946.8	22871.9	54.693
ES	ES53	Illes Balears	0.822888	10	0	3.91782	3.91782	11.4892	3.91782	19.9715	3.91782	16.7459	0	0	0	0		12473.8	11134	11134	10697.8	9468.74	8561.31	8906.38	11134	10697.8	9468.74	8561.31	8906.38		11134	11.4892	19.9715	16.7459	BioE_COM-S	11.4892	9468.74	1665.31	14.9569
ES	ES61	Andalucía	0.695187	10	0	2.07246	2.07246	9.26462	2.07246	14.7899	2.07246	10.4232	0	0	0	0		83496.7	74624.6	74624.6	73078	66307.6	62269.8	65461	74624.6	73078	66307.6	62269.8	65461		74624.6	9.26462	14.7899	10.4232	BioE_COM-S	9.26462	66307.6	8316.97	11.1451
ES	ES62	Regi¾n de Murcia	0.0569653	10	0	1.73778	1.73778	33.8607	1.73778	71.5873	1.73778	37.4987	0	0	0	0		51998.5	46772	46772	45959.2	30397.1	13058.3	28725.1	46772	45959.2	30397.1	13058.3	28725.1		46772	33.8607	71.5873	37.4987	BioE_COM-S	33.8607	30397.1	16374.9	35.01
ES	ES63	Ciudad Autónoma de Ceuta	0.0569653	10	0	0	0	33.8607	0	71.5873	0	37.4987	0	0	0	0		0	0	0	0	0	0	0	0	0	0	0	0		0	100	100	100		0	0	0	0
ES	ES64	Ciudad Autónoma de Melilla	0.0569653	10	0	0	0	33.8607	0	71.5873	0	37.4987	0	0	0	0		0	0	0	0	0	0	0	0	0	0	0	0		0	100	100	100		0	0	0	0
ES	ES70	Canarias	17.6986	10	0	14.8148	14.8148	39.76	14.8148	84.4351	14.8148	92.1318	0	0	0	0		197.312	146.152	146.152	124.5	74.9987	19.3782	9.79584	146.152	124.5	74.9987	19.3782	9.79584		146.152	39.76	84.4351	92.1318	BioE_COM-S	39.76	74.9987	71.1531	48.6844
FI	FI19	Lõnsi-Suomi	17.6986	10	0	0	0	39.76	0	84.4351	0	92.1318	0	0	0	0		0	0	0	0	0	0	0	0	0	0	0	0		0	100	100	100		0	0	0	0
FI	FI1B	Helsinki-Uusimaa	17.6986	10	0	0	0	39.76	0	84.4351	0	92.1318	0	0	0	0		0	0	0	0	0	0	0	0	0	0	0	0		0	100	100	100		0	0	0	0
FI	FI1C	Etelõ-Suomi	17.6986	10	0	0	0	39.76	0	84.4351	0	92.1318	0	0	0	0		0	0	0	0	0	0	0	0	0	0	0	0		0	100	100	100		0	0	0	0
FI	FI1D	Pohjois- ja Suomi	17.6986	10	0	0	0	39.76	0	84.4351	0	92.1318	0	0	0	0		0	0	0	0	0	0	0	0	0	0	0	0		0	100	100	100		0	0	0	0
FI	FI20	┼land	17.6986	10	0	0	0	39.76	0	84.4351	0	92.1318	0	0	0	0		0	0	0	0	0	0	0	0	0	0	0	0		0	100	100	100		0	0	0	0
FR	FR10	Ille-de-France	0	10	0	0	0	100	0	100	0	100	0.5	0	0	0		0	0	0	0	0	0	0	0	0	0	0	0		0	100	100	100		0	0	0	0
FR	FR21	Champagne-Ardenne	0	10	0	0	0	26.8608	0	51.2204	0	56.6941	0.5	0	0	0		0	0	0	0	0	0	0	0	0	0	0	0		0	100	100	100		0	0	0	0
FR	FR22	Picardie	0	10	0	0	0	68.9829	0	100	0	100	0.5	0	0	0		0	0	0	0	0	0	0	0	0	0	0	0		0	100	100	100		0	0	0	0
FR	FR23	Haute-Normandie	0	10	0	0	0	100	0	100	0	100	0.5	0	0	0		6.4165	5.77485	5.77485	5.77485	0	0	0	5.74598	5.74598	0	0	0		5.77485	100	100	100		100	0	5.77485	100
FR	FR24	Centre	0	10	0	0	0	37.2515	0	92.6722	0	89.9561	0.5	0	0	0		84.2213	75.7992	75.7992	75.7992	47.5629	5.5544	7.61321	75.4202	75.4202	47.325	5.52663	7.57515		75.7992	100	100	100	BioE_COM-S	37.2515	47.5629	28.2363	37.2515
FR	FR25	Basse-Normandie	0	10	0	0	0	35.6522	0	100	0	100	0.5	0	0	0		18.4221	16.5799	16.5799	16.5799	10.6688	0	0	16.497	16.497	10.6155	0	0		16.5799	100	100	100	BioE_COM-S	35.6522	10.6688	5.9111	35.6522
FR	FR26	Bourgogne	0	10	0	0	0	7.2456	0	33.2978	0	48.082	0.5	0	0	0		53.4141	48.0727	48.0727	48.0727	44.5895	32.0655	24.9584	47.8323	47.8323	44.3666	31.9052	24.8336		48.0727	100	100	100	BioE_COM-S	7.2456	44.5895	3.48316	7.2456
FR	FR30	Nord - Pas-de-Calais	0	10	0	0	0	100	0	100	0	100	0.5	0	0	0		0	0	0	0	0	0	0	0	0	0	0	0		0	100	100	100		0	0	0	0
FR	FR41	Lorraine	0	10	0	0	0	100	0	100	0	100	0.5	0	0	0		22.2291	20.0062	20.0062	20.0062	0	0	0	19.9062	19.9062	0	0	0		20.0062	100	100	100		100	0	20.0062	100
FR	FR42	Alsace	0	10	0	0	0	31.685	0	44.8174	0	62.8132	0.5	0	0	0		24.4429	21.9986	21.9986	21.9986	15.0284	12.1394	8.1806	21.8886	21.8886	14.9532	12.0787	8.13969		21.9986	100	100	100	BioE_COM-S	31.685	15.0284	6.97026	31.685
FR	FR43	Franche-ComtÚ	0	10	0	0	0	74.5474	0	100	0	100	0.5	0	0	0		0	0	0	0	0	0	0	0	0	0	0	0		0	100	100	100		0	0	0	0
FR	FR51	Pays de la Loire	0	10	0	0	0	30.0082	0	49.624	0	43.8344	0.5	0	0	0		89.2387	80.3148	80.3148	80.3148	56.2138	40.4594	45.1093	79.9133	79.9133	55.9328	40.2571	44.8838		80.3148	100	100	100	BioE_COM-S	30.0082	56.2138	24.101	30.0082
FR	FR52	Bretagne	0	10	0	0	0	0	0	100	0	100	0.5	0	0	0		0	0	0	0	0	0	0	0	0	0	0	0		0	100	100	100		0	0	0	0
FR	FR53	Poitou-Charentes	0.0360008	10	0	0.980392	0.980392	14.3335	0.980392	23.7657	0.980392	12.7546	0.5	0	0	0		885.624	796.775	796.775	788.963	675.877	601.461	688.334	792.791	785.018	672.498	598.453	684.893		796.775	14.3335	23.7657	12.7546	BioE_COM-L	12.7546	688.334	108.44	13.6099
FR	FR61	Aquitaine	0.057869	10	0	1.7316	1.7316	5.62776	1.7316	10.0065	1.7316	6.31736	0.5	0	0	0		8240.36	7412.03	7412.03	7283.68	6873.78	6554.84	6823.55	7374.97	7247.27	6839.41	6522.07	6789.43		7412.03	5.62776	10.0065	6.31736	BioE_COM-S	5.62776	6873.78	538.255	7.26191
FR	FR62	Midi-PyrÚnÚes	0.117193	10	0	2.55814	2.55814	16.3932	2.55814	35.6128	2.55814	24.0452	0.5	0	0	0		3542.38	3184.4	3184.4	3102.94	2594.27	1997.9	2356.83	3168.48	3087.43	2581.3	1987.91	2345.05		3184.4	16.3932	35.6128	24.0452	BioE_COM-S	16.3932	2594.27	590.134	18.532
FR	FR63	Limousin	0	10	0	4.31655	4.31655	40.056	4.31655	76.4706	4.31655	100	0.5	0	0	0		1034.07	930.661	930.661	890.488	533.794	209.527	0	926.008	886.036	531.125	208.479	0		930.661	40.056	76.4706	100	BioE_COM-S	40.056	533.794	396.867	42.6435
FR	FR71	Rh¶ne-Alpes	0.987429	10	0	1.69867	1.69867	15.8903	1.69867	33.888	1.69867	30.2583	0.5	0	0	0		10811.9	9634.6	9634.6	9470.94	7965.98	6261.42	6605.19	9586.42	9423.58	7926.15	6230.12	6572.17		9634.6	15.8903	33.888	30.2583	BioE_COM-S	15.8903	7965.98	1668.62	17.319
FR	FR72	Auvergne	0	10	0	0	0	100	0	100	0	100	0.5	0	0	0		33.872	30.4848	30.4848	30.4848	0	0	0	30.3323	30.3323	0	0	0		30.4848	100	100	100		100	0	30.4848	100
FR	FR81	Languedoc-Roussillon	0.144418	10	0	4.21687	4.21687	4.76581	4.21687	8.86176	4.21687	2.4674	0.5	0	0	0		1301.68	1169.82	1169.82	1120.49	1067.09	1021.19	1092.84	1163.97	1114.88	1061.75	1016.09	1087.38		1169.82	4.76581	8.86176	2.4674	BioE_COM-L	2.4674	1092.84	76.9766	6.58022
FR	FR82	Provence-Alpes-C¶te d'Azur	0.250887	10	0	2.8169	2.8169	13.3122	2.8169	28.1424	2.8169	20.2838	0.5	0	0	0		535.737	480.954	480.954	467.406	405.184	335.867	372.598	478.549	465.069	403.158	334.187	370.735		480.954	13.3122	28.1424	20.2838	BioE_COM-S	13.3122	405.184	75.7701	15.7541
FR	FR83	Corse	0.593575	10	0	1.14286	1.14286	35.5796	1.14286	69.9721	1.14286	100	0.5	0	0	0		1282.24	1147.16	1147.16	1134.05	730.562	340.533	0	1141.43	1128.38	726.909	338.83	0		1147.16	35.5796	69.9721	100	BioE_COM-S	35.5796	730.562	416.602	36.3158
FR	FRA1	Guadeloupe	0.593575	10	0	0	0	35.5796	0	69.9721	0	100	0.5	0	0	0		0	0	0	0	0	0	0	0	0	0	0	0		0	100	100	100		0	0	0	0
FR	FRA2	Martinique	0.593575	10	0	0	0	35.5796	0	69.9721	0	100	0.5	0	0	0		0	0	0	0	0	0	0	0	0	0	0	0		0	100	100	100		0	0	0	0
FR	FRA3	Guyane	0.593575	10	0	0	0	35.5796	0	69.9721	0	100	0.5	0	0	0		0	0	0	0	0	0	0	0	0	0	0	0		0	100	100	100		0	0	0	0
FR	FRA4	RÚunion	0.593575	10	0	0	0	35.5796	0	69.9721	0	100	0.5	0	0	0		0	0	0	0	0	0	0	0	0	0	0	0		0	100	100	100		0	0	0	0
HR	HR03	Jadranska Hrvatska	5.00495	10	0	53.8462	53.8462	52.1563	53.8462	92.087	53.8462	100	30	0	0	0		329.075	281.345	281.345	129.851	62.1258	10.2751	0	196.941	90.896	43.488	7.19256	0		281.345	52.1563	92.087	100	BioE_COM-S	52.1563	62.1258	219.219	77.9183
HR	HR04	Kontinentalna Hrvatska	0	10	0	24.1653	24.1653	19.6388	24.1653	80.6321	24.1653	100	30	0	0	0		6197.01	5577.31	5577.31	4229.54	3398.9	819.174	0	3904.12	2960.68	2379.23	573.422	0		5577.31	19.6388	80.6321	100	BioE_COM-S	19.6388	3398.9	2178.41	39.0584
HU	HU10	Közép-Magyarország	0	10	0	23.0769	23.0769	53.238	23.0769	99.4603	23.0769	100	0	0	0	0		238.707	214.836	214.836	165.259	77.2782	0.891843	0	214.836	165.259	77.2782	0.891843	0		214.836	53.238	99.4603	100	BioE_COM-S	53.238	77.2782	137.558	64.0292
HU	HU21	Közép-Dunántúl	0	10	0	25	25	88.6598	25	100	25	100	0	0	0	0		413.148	371.833	371.833	278.875	31.625	0	0	371.833	278.875	31.625	0	0		371.833	88.6598	100	100	BioE_COM-S	88.6598	31.625	340.208	91.4948
HU	HU22	Nyugat-Dunántúl	0	10	0	27.3684	27.3684	92.598	27.3684	100	27.3684	100	0	0	0	0		919.249	827.324	827.324	600.899	44.4783	0	0	827.324	600.899	44.4783	0	0		827.324	92.598	100	100	BioE_COM-S	92.598	44.4783	782.846	94.6238
HU	HU23	Dél-Dunántúl	0	10	0	17.3913	17.3913	70.5856	17.3913	99.9404	17.3913	100	0	0	0	0		1122.31	1010.08	1010.08	834.41	245.437	0.497339	0	1010.08	834.41	245.437	0.497339	0		1010.08	70.5856	99.9404	100	BioE_COM-S	70.5856	245.437	764.639	75.7012
HU	HU31	Észak-Magyarország	0	10	0	13.1313	13.1313	38.3548	13.1313	91.1837	13.1313	99.449	0	0	0	0		959.3	863.37	863.37	749.998	462.338	66.122	4.13263	863.37	749.998	462.338	66.122	4.13263		863.37	38.3548	91.1837	99.449	BioE_COM-S	38.3548	462.338	401.032	46.4496
HU	HU32	Észak-Alföld	0	10	0	9.86547	9.86547	25.7606	9.86547	43.2429	9.86547	26.1133	0	0	0	0		2132.72	1919.45	1919.45	1730.08	1284.4	981.945	1278.3	1919.45	1730.08	1284.4	981.945	1278.3		1919.45	25.7606	43.2429	26.1133	BioE_COM-S	25.7606	1284.4	635.042	33.0847
HU	HU33	Dél-Alföld	0	10	0	14.0351	14.0351	32.1212	14.0351	58.3377	14.0351	43.8182	0	0	0	0		509.426	458.484	458.484	394.135	267.534	164.206	221.432	458.484	394.135	267.534	164.206	221.432		458.484	32.1212	58.3377	43.8182	BioE_COM-S	32.1212	267.534	190.95	41.6481
IE	IE01	Border, Midland and Western	0	10	0	0	0	32.1212	0	58.3377	0	43.8182	0	0	0	0		0	0	0	0	0	0	0	0	0	0	0	0		0	100	100	100		0	0	0	0
IE	IE02	Southern and Eastern	0	10	0	0	0	32.1212	0	58.3377	0	43.8182	0	0	0	0		0	0	0	0	0	0	0	0	0	0	0	0		0	100	100	100		0	0	0	0
IT	ITC1	Piemonte	0.217174	10	0	10.4892	10.4892	5.9224	10.4892	10.6239	10.4892	12.5902	30	0	0	0		19724.1	17713.1	17713.1	15855.2	14916.2	14170.7	13859	12399.2	11098.6	10441.3	9919.51	9701.28		17713.1	5.9224	10.6239	12.5902	BioE_COM-S	5.9224	14916.2	2796.98	15.7904
IT	ITC2	Valle d'Aosta/VallÚe d'Aoste	23.4848	10	0	40	40	100	40	100	40	100	30	0	0	0		50.1879	34.5612	34.5612	20.7367	0	0	0	24.1929	14.5157	0	0	0		34.5612	100	100	100		100	0	34.5612	100
IT	ITC3	Liguria	5.53111	10	0	17.8218	17.8218	41.0434	17.8218	52.7656	17.8218	53.4884	30	0	0	0		868.148	738.117	738.117	606.571	357.614	286.51	282.126	516.682	424.6	250.33	200.557	197.488		738.117	41.0434	52.7656	53.4884	BioE_COM-S	41.0434	357.614	380.503	51.5505
IT	ITC4	Lombardia	4.37391	10	0	9.67742	9.67742	13.4466	9.67742	26.0685	9.67742	21.3697	30	0	0	0		1118.11	962.288	962.288	869.163	752.29	642.586	683.426	673.602	608.414	526.603	449.81	478.398		962.288	13.4466	26.0685	21.3697	BioE_COM-S	13.4466	752.29	209.998	21.8228
IT	ITF1	Abruzzo	1.25987	10	0	16.8	16.8	9.26953	16.8	16.7309	16.8	11.8154	30	0	0	0		995.825	884.951	884.951	736.279	668.03	613.094	649.285	619.466	515.396	467.621	429.165	454.5		884.951	9.26953	16.7309	11.8154	BioE_COM-S	9.26953	668.03	216.921	24.5123
IT	ITF2	Molise	0.689655	10	0	14.2857	14.2857	14.063	14.2857	29.5052	14.2857	24.7676	30	0	0	0		253.17	226.281	226.281	193.955	166.68	136.728	145.917	158.397	135.769	116.676	95.7099	102.142		226.281	14.063	29.5052	24.7676	BioE_COM-S	14.063	166.68	59.6018	26.3397
IT	ITF3	Campania	2.94054	10	0	18.8912	18.8912	11.2469	18.8912	20.448	18.8912	9.85529	30	0	0	0		24863.6	21719.2	21719.2	17616.2	15634.9	14014	15880.1	15203.4	12331.3	10944.4	9809.82	11116.1		21719.2	11.2469	20.448	9.85529	BioE_COM-L	9.85529	15880.1	5839.14	26.8847
IT	ITF4	Puglia	0.425932	10	0	16.7763	16.7763	1.94955	16.7763	4.63333	16.7763	3.35229	30	0	0	0		10068.8	9023.32	9023.32	7509.54	7363.14	7161.6	7257.8	6316.33	5256.68	5154.2	5013.12	5080.46		9023.32	1.94955	4.63333	3.35229	BioE_COM-S	1.94955	7363.14	1660.18	18.3988
IT	ITF5	Basilicata	0.460429	10	0	7.10059	7.10059	26.7049	7.10059	42.8096	7.10059	23.6302	30	0	0	0		1189.27	1065.42	1065.42	989.767	725.451	566.051	755.882	745.792	692.837	507.815	396.236	529.118		1065.42	26.7049	42.8096	23.6302	BioE_COM-L	23.6302	755.882	309.535	29.0529
IT	ITF6	Calabria	1.16964	10	0	11.6301	11.6301	4.15599	11.6301	7.19301	11.6301	3.77383	30	0	0	0		6787.37	6037.18	6037.18	5335.05	5113.33	4951.3	5133.71	4226.03	3734.54	3579.33	3465.91	3593.6		6037.18	4.15599	7.19301	3.77383	BioE_COM-L	3.77383	5133.71	903.467	14.9651
IT	ITG1	Sicilia	1.77257	10	0	12.9545	12.9545	23.1852	12.9545	36.9344	12.9545	22.2833	30	0	0	0		22352.9	19761	19761	17201	13212.9	10847.9	13368.1	13832.7	12040.7	9249.06	7593.56	9357.66		19761	23.1852	36.9344	22.2833	BioE_COM-L	22.2833	13368.1	6392.91	32.3511
IT	ITG2	Sardegna	0.271239	10	0	8.77193	8.77193	31.0084	8.77193	60.6219	8.77193	73.283	30	0	0	0		1360.97	1221.55	1221.55	1114.4	768.842	438.83	297.735	855.088	780.08	538.19	307.181	208.414		1221.55	31.0084	60.6219	73.283	BioE_COM-S	31.0084	768.842	452.712	37.0603
IT	ITH1	Provincia Autonoma Bolzano/Bozen	18.7184	10	0	7.69231	7.69231	2.60764	7.69231	5.21528	7.69231	9.82414	30	0	0	0		71.5186	52.3183	52.3183	48.2938	47.0345	45.7751	43.5494	36.6228	33.8057	32.9241	32.0426	30.4845		52.3183	2.60764	5.21528	9.82414	BioE_COM-S	2.60764	47.0345	5.28381	10.0994
IT	ITH2	Provincia Autonoma Trento	17.3829	10	0	26.087	26.087	15.4273	26.087	23.0082	26.087	13.3752	30	0	0	0		149.345	111.046	111.046	82.0776	69.4152	63.193	71.0995	77.7323	57.4543	48.5906	44.2351	49.7697		111.046	15.4273	23.0082	13.3752	BioE_COM-L	13.3752	71.0995	39.9466	35.973
IT	ITH3	Veneto	2.97166	10	0	9.70874	9.70874	7.03257	9.70874	11.6751	9.70874	9.78215	30	0	0	0		936.76	818.03	818.03	738.61	686.667	652.376	666.358	572.621	517.027	480.667	456.663	466.451		818.03	7.03257	11.6751	9.78215	BioE_COM-S	7.03257	686.667	131.364	16.0585
IT	ITH4	Friuli-Venezia Giulia	0	10	0	13.3333	13.3333	20.5025	13.3333	38.4029	13.3333	48.6765	30	0	0	0		120.673	108.605	108.605	94.1247	74.8268	57.9781	48.3081	76.0238	65.8873	52.3788	40.5847	33.8156		108.605	20.5025	38.4029	48.6765	BioE_COM-S	20.5025	74.8268	33.7786	31.1021
IT	ITH5	Emilia-Romagna	0.0263852	10	0	3.68421	3.68421	17.1768	3.68421	29.1293	3.68421	24.7493	30	0	0	0		3625.66	3262.24	3262.24	3142.05	2602.35	2226.79	2364.41	2283.56	2199.43	1821.64	1558.75	1655.09		3262.24	17.1768	29.1293	24.7493	BioE_COM-S	17.1768	2602.35	659.89	20.2282
IT	ITI1	Toscana	0.451054	10	0	9.40919	9.40919	14.3174	9.40919	30.4814	9.40919	21.3088	30	0	0	0		11740.6	10518.9	10518.9	9529.15	8164.82	6624.54	7498.61	7363.23	6670.41	5715.37	4637.18	5249.02		10518.9	14.3174	30.4814	21.3088	BioE_COM-S	14.3174	8164.82	2354.07	22.3795
IT	ITI2	Umbria	2.66376	10	0	4.72441	4.72441	22.0524	4.72441	65.6914	4.72441	53.0713	30	0	0	0		1168.12	1023.3	1023.3	974.959	759.957	334.495	457.535	716.313	682.471	531.97	234.146	320.275		1023.3	22.0524	65.6914	53.0713	BioE_COM-S	22.0524	759.957	263.347	25.735
IT	ITI3	Marche	0	10	0	10.5882	10.5882	64.5556	10.5882	88	10.5882	93.2222	30	0	0	0		1637.12	1473.41	1473.41	1317.4	466.946	158.088	89.2907	1031.39	922.182	326.862	110.662	62.5035		1473.41	64.5556	88	93.2222	BioE_COM-S	64.5556	466.946	1006.47	68.3085
IT	ITI4	Lazio	2.8532	10	0	10.2554	10.2554	13.9902	10.2554	34.8754	10.2554	30.3477	30	0	0	0		19623.1	17156.9	17156.9	15397.4	13243.2	10027.5	10724.6	12009.8	10778.2	9270.27	7019.23	7507.24		17156.9	13.9902	34.8754	30.3477	BioE_COM-S	13.9902	13243.2	3913.62	22.8108
LT	LT00	Lietuva	0	10	0	0	0	42.0103	0	100	0	100	5	0	0	0		73.5878	66.229	66.229	66.229	38.406	0	0	62.9175	62.9175	36.4857	0	0		66.229	100	100	100	BioE_COM-S	42.0103	38.406	27.823	42.0103
LU	LU00	Luxembourg	0	10	0	0	0	100	0	100	0	100	0	0	0	0		0	0	0	0	0	0	0	0	0	0	0	0		0	100	100	100		0	0	0	0
LV	LV00	Latvija	0	10	0	0	0	72.3485	0	100	0	100	0	0	0	0		0	0	0	0	0	0	0	0	0	0	0	0		0	100	100	100		0	0	0	0
MT	MT00	Malta	0	10	0	0	0	100	0	100	0	100	0	0	0	0		0	0	0	0	0	0	0	0	0	0	0	0		0	100	100	100		0	0	0	0
NL	NL11	Groningen	0	10	0	0	0	100	0	100	0	100	0.5	0	0	0		0	0	0	0	0	0	0	0	0	0	0	0		0	100	100	100		0	0	0	0
NL	NL12	Friesland (NL)	0	10	0	0	0	100	0	100	0	100	0.5	0	0	0		0	0	0	0	0	0	0	0	0	0	0	0		0	100	100	100		0	0	0	0
NL	NL13	Drenthe	0	10	0	0	0	100	0	100	0	100	0.5	0	0	0		0	0	0	0	0	0	0	0	0	0	0	0		0	100	100	100		0	0	0	0
NL	NL21	Overijssel	0	10	0	0	0	100	0	100	0	100	0.5	0	0	0		0	0	0	0	0	0	0	0	0	0	0	0		0	100	100	100		0	0	0	0
NL	NL22	Gelderland	0	10	0	0	0	44.7581	0	73.7903	0	100	0.5	0	0	0		0	0	0	0	0	0	0	0	0	0	0	0		0	100	100	100		0	0	0	0
NL	NL23	Flevoland	0	10	0	0	0	69.4184	0	100	0	100	0.5	0	0	0		0	0	0	0	0	0	0	0	0	0	0	0		0	100	100	100		0	0	0	0
NL	NL31	Utrecht	0	10	0	0	0	18.9189	0	100	0	100	0.5	0	0	0		0	0	0	0	0	0	0	0	0	0	0	0		0	100	100	100		0	0	0	0
NL	NL32	Noord-Holland	0	10	0	0	0	14.1176	0	100	0	100	0.5	0	0	0		0	0	0	0	0	0	0	0	0	0	0	0		0	100	100	100		0	0	0	0
NL	NL33	Zuid-Holland	0	10	0	0	0	6.25	0	100	0	100	0.5	0	0	0		0	0	0	0	0	0	0	0	0	0	0	0		0	100	100	100		0	0	0	0
NL	NL34	Zeeland	0.37594	10	0	0	0	46.9925	0	100	0	100	0.5	0	0	0		0	0	0	0	0	0	0	0	0	0	0	0		0	100	100	100		0	0	0	0
NL	NL41	Noord-Brabant	0	10	0	0	0	100	0	100	0	100	0.5	0	0	0		12.1051	10.8946	10.8946	10.8946	0	0	0	10.8402	10.8402	0	0	0		10.8946	100	100	100		100	0	10.8946	100
NL	NL42	Limburg (NL)	0	10	0	0	0	7.85714	0	100	0	100	0.5	0	0	0		0	0	0	0	0	0	0	0	0	0	0	0		0	100	100	100		0	0	0	0
PL	PL11	Lodzkie	0	10	0	14.8148	14.8148	5.74253	14.8148	8.755	14.8148	18.8515	5	0	0	0		224.746	202.272	202.272	172.306	162.411	157.22	139.823	192.158	163.69	154.29	149.359	132.832		202.272	5.74253	8.755	18.8515	BioE_COM-S	5.74253	162.411	39.8609	19.7066
PL	PL12	Mazowieckie	0	10	0	3.7037	3.7037	3.35825	3.7037	7.10217	3.7037	6.84704	5	0	0	0		926.294	833.665	833.665	802.788	775.829	745.773	747.821	791.982	762.649	737.037	708.484	710.43		833.665	3.35825	7.10217	6.84704	BioE_COM-S	3.35825	775.829	57.8361	6.93758
PL	PL21	Malopolskie	0	10	0	12.3077	12.3077	17.8306	12.3077	59.4354	12.3077	100	5	0	0	0		468.554	421.698	421.698	369.797	303.86	150.007	0	400.613	351.307	288.667	142.506	0		421.698	17.8306	59.4354	100	BioE_COM-S	17.8306	303.86	117.838	27.9438
PL	PL22	Slaskie	0	10	0	11.1111	11.1111	25.9843	11.1111	100	11.1111	100	5	0	0	0		139.318	125.386	125.386	111.454	82.4938	0	0	119.117	105.882	78.3691	0	0		125.386	25.9843	100	100	BioE_COM-S	25.9843	82.4938	42.8924	34.2082
PL	PL31	Lubelskie	0	10	0	5.13514	5.13514	9.04847	5.13514	17.3788	5.13514	21.6517	5	0	0	0		3014.44	2712.99	2712.99	2573.68	2340.8	2126.4	2016.43	2577.34	2444.99	2223.76	2020.08	1915.61		2712.99	9.04847	17.3788	21.6517	BioE_COM-S	9.04847	2340.8	372.194	13.719
PL	PL32	Podkarpackie	0	10	0	20.5263	20.5263	48.7719	20.5263	95.0877	20.5263	91.5789	5	0	0	0		1508.46	1357.61	1357.61	1078.94	552.721	53.0007	90.8583	1289.73	1025	525.085	50.3507	86.3154		1357.61	48.7719	95.0877	91.5789	BioE_COM-S	48.7719	552.721	804.888	59.2872
PL	PL33	Swietokrzyskie	0	10	0	12.8205	12.8205	2.99658	12.8205	6.91353	12.8205	10.4024	5	0	0	0		631.514	568.363	568.363	495.496	480.648	461.24	443.952	539.945	470.721	456.615	438.178	421.755		568.363	2.99658	6.91353	10.4024	BioE_COM-S	2.99658	480.648	87.7149	15.4329
PL	PL34	Podlaskie	0	10	0	0	0	49.4505	0	100	0	100	5	0	0	0		367.911	331.12	331.12	331.12	167.379	0	0	314.564	314.564	159.01	0	0		331.12	100	100	100	BioE_COM-S	49.4505	167.379	163.741	49.4505
PL	PL41	Wielkopolskie	0	10	0	1	1	5.4883	1	24.0517	1	56.0129	5	0	0	0		2644.94	2380.44	2380.44	2356.64	2227.3	1789.83	1036.62	2261.42	2238.81	2115.93	1700.34	984.785		2380.44	5.4883	24.0517	56.0129	BioE_COM-S	5.4883	2227.3	153.144	6.43341
PL	PL42	Zachodniopomorskie	0.724638	10	0	0.169348	0.169348	9.05797	0.169348	100	0.169348	100	5	0	0	0		9648.41	8620.65	8620.65	8606.05	7826.51	0	0	8189.61	8175.75	7435.19	0	0		8620.65	9.05797	100	100	BioE_COM-S	9.05797	7826.51	794.132	9.21198
PL	PL43	Lubuskie	0	10	0	0.414938	0.414938	16.6065	0.414938	100	0.414938	100	5	0	0	0		2162.12	1945.91	1945.91	1937.84	1616.03	0	0	1848.62	1840.95	1535.23	0	0		1945.91	16.6065	100	100	BioE_COM-S	16.6065	1616.03	329.881	16.9525
PL	PL51	Dolnoslaskie	0	10	0	2.27273	2.27273	23.0228	2.27273	75.3954	2.27273	100	5	0	0	0		1131.18	1018.06	1018.06	994.92	765.861	244.796	0	967.155	945.174	727.568	232.556	0		1018.06	23.0228	75.3954	100	BioE_COM-S	23.0228	765.861	252.197	24.7723
PL	PL52	Opolskie	0	10	0	20	20	45.9016	20	100	20	100	5	0	0	0		40.4908	36.4417	36.4417	29.1534	15.7715	0	0	34.6197	27.6957	14.9829	0	0		36.4417	45.9016	100	100	BioE_COM-S	45.9016	15.7715	20.6702	56.7213
PL	PL61	Kujawsko-Pomorskie	0	10	0	1.90476	1.90476	43.254	1.90476	100	1.90476	100	5	0	0	0		838.255	754.43	754.43	740.06	419.954	0	0	716.708	703.057	398.957	0	0		754.43	43.254	100	100	BioE_COM-S	43.254	419.954	334.475	44.3348
PL	PL62	Warminsko-Mazurskie	0	10	0	0.456621	0.456621	0	0.456621	100	0.456621	100	5	0	0	0		1571.64	1414.48	1414.48	1408.02	1408.02	0	0	1343.75	1337.62	1337.62	0	0		1414.48	0	100	100	BioE_COM-S	0	1408.02	6.4588	0.456621
PL	PL63	Pomorskie	0	10	0	2.63158	2.63158	26.9565	2.63158	100	2.63158	100	5	0	0	0		232.299	209.069	209.069	203.567	148.692	0	0	198.615	193.389	141.258	0	0		209.069	26.9565	100	100	BioE_COM-S	26.9565	148.692	60.3764	28.8787
PT	PT11	Norte	0.85056	10	0	5.34447	5.34447	8.43347	5.34447	15.4407	5.34447	7.30937	0	0	0	0		33084.6	29522.9	29522.9	27945	25588.3	23630.1	25902.4	29522.9	27945	25588.3	23630.1	25902.4		29522.9	8.43347	15.4407	7.30937	BioE_COM-L	7.30937	25902.4	3620.45	12.2632
PT	PT15	Algarve	0.325504	10	0	7.98005	7.98005	9.20347	7.98005	23.7171	7.98005	21.5216	0	0	0	0		10329	9265.81	9265.81	8526.39	7741.67	6504.18	6691.38	9265.81	8526.39	7741.67	6504.18	6691.38		9265.81	9.20347	23.7171	21.5216	BioE_COM-S	9.20347	7741.67	1524.14	16.4491
PT	PT16	Centro (P)	0.11461	10	0	11.4374	11.4374	30.1647	11.4374	56.2411	11.4374	34.862	0	0	0	0		1399.67	1258.26	1258.26	1114.34	778.205	487.625	725.861	1258.26	1114.34	778.205	487.625	725.861		1258.26	30.1647	56.2411	34.862	BioE_COM-S	30.1647	778.205	480.051	38.1521
PT	PT17	Centro (P)	0	10	0	1.17647	1.17647	22.1436	1.17647	41.9172	1.17647	56.7386	0	0	0	0		718.022	646.22	646.22	638.617	497.204	370.927	276.275	646.22	638.617	497.204	370.927	276.275		646.22	22.1436	41.9172	56.7386	BioE_COM-S	22.1436	497.204	149.016	23.0596
PT	PT18	Centro (P)	0	10	0	0.385902	0.385902	22.2425	0.385902	40.866	0.385902	22.3361	0	0	0	0		30645	27580.5	27580.5	27474.1	21363.1	16246.5	21337.4	27580.5	27474.1	21363.1	16246.5	21337.4		27580.5	22.2425	40.866	22.3361	BioE_COM-S	22.2425	21363.1	6217.37	22.5426
PT	PT20	RegiÒo Aut¾noma dos Aþores	2.66667	10	0	42.8571	42.8571	100	42.8571	100	42.8571	100	0	0	0	0		0	0	0	0	0	0	0	0	0	0	0	0		0	100	100	100		0	0	0	0
PT	PT30	RegiÒo Aut¾noma da Madeira	25.1309	10	0	80	80	59.6859	80	100	80	100	0	0	0	0		100	67.3822	67.3822	13.4764	5.43291	0	0	67.3822	13.4764	5.43291	0	0		67.3822	59.6859	100	100	BioE_COM-S	59.6859	5.43291	61.9493	91.9372
RO	RO11	Nord-Vest	0	10	0	10.2041	10.2041	64.1074	10.2041	85.414	10.2041	90.073	5	0	0	0		414.485	373.037	373.037	334.972	120.23	48.8589	33.2528	354.385	318.223	114.219	46.416	31.5901		373.037	64.1074	85.414	90.073	BioE_COM-S	64.1074	120.23	252.807	67.7699
RO	RO12	Centru	0.0448511	10	0	8	8	92.6444	8	100	8	100	5	0	0	0		181.797	163.544	163.544	150.46	11.0672	0	0	155.367	142.937	10.5139	0	0		163.544	92.6444	100	100	BioE_COM-S	92.6444	11.0672	152.477	93.2329
RO	RO21	Nord-Est	0	10	0	14.2857	14.2857	78.7461	14.2857	100	14.2857	100	5	0	0	0		228.464	205.618	205.618	176.244	37.4587	0	0	195.337	167.432	35.5858	0	0		205.618	78.7461	100	100	BioE_COM-S	78.7461	37.4587	168.159	81.7824
RO	RO22	Sud-Est	0.0149629	10	0	15.3846	15.3846	46.4927	15.3846	75.8828	15.3846	60.9917	5	0	0	0		91.8739	82.6741	82.6741	69.955	37.431	16.8712	27.2882	78.5404	66.4573	35.5595	16.0276	25.9238		82.6741	46.4927	75.8828	60.9917	BioE_COM-S	46.4927	37.431	45.2431	54.7246
RO	RO31	Sud - Muntenia	0	10	0	25	25	43.8393	25	54.2651	25	43.3466	5	0	0	0		59.8812	53.8931	53.8931	40.4198	22.7	18.486	22.8992	51.1984	38.3988	21.565	17.5617	21.7542		53.8931	43.8393	54.2651	43.3466	BioE_COM-L	43.3466	22.8992	30.9939	57.5099
RO	RO32	Bucuresti - Ilfov	0	10	0	0	0	100	0	100	0	100	5	0	0	0		9.59169	8.63252	8.63252	8.63252	0	0	0	8.20089	8.20089	0	0	0		8.63252	100	100	100		100	0	8.63252	100
RO	RO41	Sud-Vest Oltenia	0.0152151	10	0	11.7647	11.7647	71.3499	11.7647	83.3029	11.7647	79.8339	5	0	0	0		144.566	130.09	130.09	114.785	32.8861	19.1658	23.1477	123.585	109.046	31.2418	18.2075	21.9903		130.09	71.3499	83.3029	79.8339	BioE_COM-S	71.3499	32.8861	97.2037	74.7205
RO	RO42	Vest	0.17963	10	0	1.88679	1.88679	64.9123	1.88679	89.306	1.88679	93.6171	5	0	0	0		497.027	446.521	446.521	438.096	153.718	46.8499	27.963	424.195	416.191	146.032	44.5074	26.5649		446.521	64.9123	89.306	93.6171	BioE_COM-S	64.9123	153.718	292.803	65.5743
SE	SE11	Stockholm	0	10	0	0	0	100	0	100	0	100	0	0	0	0		0	0	0	0	0	0	0	0	0	0	0	0		0	100	100	100		0	0	0	0
SE	SE12	Ostra Mellansverige	0	10	0	0	0	100	0	100	0	100	0	0	0	0		0	0	0	0	0	0	0	0	0	0	0	0		0	100	100	100		0	0	0	0
SE	SE21	SmÕland med oarna	0	10	0	0	0	100	0	100	0	100	0	0	0	0		0	0	0	0	0	0	0	0	0	0	0	0		0	100	100	100		0	0	0	0
SE	SE22	Sydsverige	0.283286	10	0	0	0	46.4589	0	100	0	100	0	0	0	0		0	0	0	0	0	0	0	0	0	0	0	0		0	100	100	100		0	0	0	0
SE	SE23	Võstsverige	0	10	0	0	0	100	0	100	0	100	0	0	0	0		0	0	0	0	0	0	0	0	0	0	0	0		0	100	100	100		0	0	0	0
SE	SE31	Norra Mellansverige	0	10	0	0	0	100	0	100	0	100	0	0	0	0		0	0	0	0	0	0	0	0	0	0	0	0		0	100	100	100		0	0	0	0
SE	SE32	Mellersta Norrland	0	10	0	0	0	100	0	100	0	100	0	0	0	0		0	0	0	0	0	0	0	0	0	0	0	0		0	100	100	100		0	0	0	0
SE	SE33	Ovre Norrland	0	10	0	0	0	100	0	100	0	100	0	0	0	0		0	0	0	0	0	0	0	0	0	0	0	0		0	100	100	100		0	0	0	0
SI	SI03	Vzhodna Slovenija	0.652316	10	0	19.2982	19.2982	55.3164	19.2982	90.0848	19.2982	100	30	0	0	0		473.293	423.185	423.185	341.518	152.603	33.8622	0	296.23	239.062	106.822	23.7035	0		423.185	55.3164	90.0848	100	BioE_COM-S	55.3164	152.603	270.583	63.9395
SI	SI04	Zahodna Slovenija	0.694444	10	0	15.3846	15.3846	36.0243	15.3846	57.2917	15.3846	48.2639	30	0	0	0		93.9142	83.9359	83.9359	71.0226	45.4372	30.3326	36.7444	58.7551	49.7158	31.8061	21.2328	25.721		83.9359	36.0243	57.2917	48.2639	BioE_COM-S	36.0243	45.4372	38.4986	45.8667
SK	SK01	Bratislavsky	0	10	0	0	0	62.6523	0	100	0	100	0	0	0	0		0	0	0	0	0	0	0	0	0	0	0	0		0	100	100	100		0	0	0	0
SK	SK02	Zapadne Slovensko	0	10	0	0	0	94.5463	0	100	0	100	0	0	0	0		33.5585	30.2027	30.2027	30.2027	1.64715	0	0	30.2027	30.2027	1.64715	0	0		30.2027	100	100	100	BioE_COM-S	94.5463	1.64715	28.5555	94.5463
SK	SK03	Stredne Slovensko	0	10	0	0	0	100	0	100	0	100	0	0	0	0		135.521	121.969	121.969	121.969	0	0	0	121.969	121.969	0	0	0		121.969	100	100	100		100	0	121.969	100
SK	SK04	Vychodne Slovensko	0.157853	10	0	0	0	99.7632	0	100	0	100	0	0	0	0		7.4794	6.72083	6.72083	6.72083	0.0159136	0	0	6.72083	6.72083	0.0159136	0	0		6.72083	100	100	100	BioE_COM-S	99.7632	0.0159136	6.70492	99.7632
UK	UKC1	Tees Valley and Durham	0.157853	10	0	0	0	99.7632	0	100	0	100	0	0	0	0		0	0	0	0	0	0	0	0	0	0	0	0		0	100	100	100		0	0	0	0
UK	UKC2	Northumberland and Tyne and Wear	0.157853	10	0	0	0	99.7632	0	100	0	100	0	0	0	0		0	0	0	0	0	0	0	0	0	0	0	0		0	100	100	100		0	0	0	0
UK	UKD1	Cumbria	0.157853	10	0	0	0	99.7632	0	100	0	100	0	0	0	0		0	0	0	0	0	0	0	0	0	0	0	0		0	100	100	100		0	0	0	0
UK	UKD3	Greater Manchester	0.157853	10	0	0	0	99.7632	0	100	0	100	0	0	0	0		0	0	0	0	0	0	0	0	0	0	0	0		0	100	100	100		0	0	0	0
UK	UKD4	Lancashire	0.157853	10	0	0	0	99.7632	0	100	0	100	0	0	0	0		0	0	0	0	0	0	0	0	0	0	0	0		0	100	100	100		0	0	0	0
UK	UKD6	Cheshire	0.157853	10	0	0	0	99.7632	0	100	0	100	0	0	0	0		0	0	0	0	0	0	0	0	0	0	0	0		0	100	100	100		0	0	0	0
UK	UKD7	Merseyside	0.157853	10	0	0	0	99.7632	0	100	0	100	0	0	0	0		0	0	0	0	0	0	0	0	0	0	0	0		0	100	100	100		0	0	0	0
UK	UKE1	East Yorkshire and Northern Lincolnshire	0.157853	10	0	0	0	99.7632	0	100	0	100	0	0	0	0		0	0	0	0	0	0	0	0	0	0	0	0		0	100	100	100		0	0	0	0
UK	UKE2	North Yorkshire	0.157853	10	0	0	0	99.7632	0	100	0	100	0	0	0	0		0	0	0	0	0	0	0	0	0	0	0	0		0	100	100	100		0	0	0	0
UK	UKE3	South Yorkshire	0.157853	10	0	0	0	99.7632	0	100	0	100	0	0	0	0		0	0	0	0	0	0	0	0	0	0	0	0		0	100	100	100		0	0	0	0
UK	UKE4	West Yorkshire	0.157853	10	0	0	0	99.7632	0	100	0	100	0	0	0	0		0	0	0	0	0	0	0	0	0	0	0	0		0	100	100	100		0	0	0	0
UK	UKF1	Derbyshire and Nottinghamshire	0	10	0	0	0	100	0	100	0	100	0	0	0	0		0	0	0	0	0	0	0	0	0	0	0	0		0	100	100	100		0	0	0	0
UK	UKF2	Leicestershire, Rutland and Northamptonshire	0	10	0	0	0	100	0	100	0	100	0	0	0	0		0	0	0	0	0	0	0	0	0	0	0	0		0	100	100	100		0	0	0	0
UK	UKF3	Lincolnshire	0	10	0	0	0	100	0	100	0	100	0	0	0	0		0	0	0	0	0	0	0	0	0	0	0	0		0	100	100	100		0	0	0	0
UK	UKG1	Herefordshire, Worcestershire and Warwickshire	0	10	0	0	0	100	0	100	0	100	0	0	0	0		0	0	0	0	0	0	0	0	0	0	0	0		0	100	100	100		0	0	0	0
UK	UKG2	Shropshire and Staffordshire	0	10	0	0	0	100	0	100	0	100	0	0	0	0		0	0	0	0	0	0	0	0	0	0	0	0		0	100	100	100		0	0	0	0
UK	UKG3	West Midlands	0	10	0	0	0	100	0	100	0	100	0	0	0	0		0	0	0	0	0	0	0	0	0	0	0	0		0	100	100	100		0	0	0	0
UK	UKH1	East Anglia	0	10	0	0	0	100	0	100	0	100	0	0	0	0		0	0	0	0	0	0	0	0	0	0	0	0		0	100	100	100		0	0	0	0
UK	UKH2	Bedfordshire and Hertfordshire	0	10	0	0	0	100	0	100	0	100	0	0	0	0		0	0	0	0	0	0	0	0	0	0	0	0		0	100	100	100		0	0	0	0
UK	UKH3	Essex	0	10	0	0	0	100	0	100	0	100	0	0	0	0		0	0	0	0	0	0	0	0	0	0	0	0		0	100	100	100		0	0	0	0
UK	UKI3	Inner London	0	10	0	0	0	100	0	100	0	100	0	0	0	0		0	0	0	0	0	0	0	0	0	0	0	0		0	100	100	100		0	0	0	0
UK	UKI4	Inner London	0	10	0	0	0	100	0	100	0	100	0	0	0	0		0	0	0	0	0	0	0	0	0	0	0	0		0	100	100	100		0	0	0	0
UK	UKI5	Outer London	0	10	0	0	0	100	0	100	0	100	0	0	0	0		0	0	0	0	0	0	0	0	0	0	0	0		0	100	100	100		0	0	0	0
UK	UKI6	Outer London	0	10	0	0	0	100	0	100	0	100	0	0	0	0		0	0	0	0	0	0	0	0	0	0	0	0		0	100	100	100		0	0	0	0
UK	UKI7	Outer London	0	10	0	0	0	100	0	100	0	100	0	0	0	0		0	0	0	0	0	0	0	0	0	0	0	0		0	100	100	100		0	0	0	0
UK	UKJ1	Berkshire, Buckinghamshire and Oxfordshire	0	10	0	0	0	100	0	100	0	100	0	0	0	0		0	0	0	0	0	0	0	0	0	0	0	0		0	100	100	100		0	0	0	0
UK	UKJ2	Berkshire, Buckinghamshire and Oxfordshire	0	10	0	0	0	41.8605	0	100	0	100	0	0	0	0		0	0	0	0	0	0	0	0	0	0	0	0		0	100	100	100		0	0	0	0
UK	UKJ3	Hampshire and Isle of Wight	0	10	0	0	0	100	0	100	0	100	0	0	0	0		0	0	0	0	0	0	0	0	0	0	0	0		0	100	100	100		0	0	0	0
UK	UKJ4	Hampshire and Isle of Wight	0	10	0	0	0	0	0	0	0	0	0	0	0	0		0	0	0	0	0	0	0	0	0	0	0	0		0	100	100	100		0	0	0	0
UK	UKK1	Gloucestershire, Wiltshire and Bristol/Bath area	0	10	0	0	0	0	0	0	0	0	0	0	0	0		0	0	0	0	0	0	0	0	0	0	0	0		0	100	100	100		0	0	0	0
UK	UKK2	Dorset and Somerset	0	10	0	0	0	0	0	100	0	100	0	0	0	0		0	0	0	0	0	0	0	0	0	0	0	0		0	100	100	100		0	0	0	0
UK	UKK3	Cornwall and Isles of Scilly	0	10	0	0	0	0	0	100	0	100	0	0	0	0		0	0	0	0	0	0	0	0	0	0	0	0		0	100	100	100		0	0	0	0
UK	UKK4	Devon	0	10	0	0	0	0	0	100	0	100	0	0	0	0		0	0	0	0	0	0	0	0	0	0	0	0		0	100	100	100		0	0	0	0
UK	UKL1	West Wales and The Valleys	10.4895	10	0	0	0	100	0	100	0	100	0	0	0	0		0	0	0	0	0	0	0	0	0	0	0	0		0	100	100	100		0	0	0	0
UK	UKL2	East Wales	10.4895	10	0	0	0	100	0	100	0	100	0	0	0	0		0	0	0	0	0	0	0	0	0	0	0	0		0	100	100	100		0	0	0	0
UK	UKM2	Eastern Scotland	10.4895	10	0	0	0	100	0	100	0	100	0	0	0	0		0	0	0	0	0	0	0	0	0	0	0	0		0	100	100	100		0	0	0	0
UK	UKM3	South Western Scotland	10.4895	10	0	0	0	100	0	100	0	100	0	0	0	0		0	0	0	0	0	0	0	0	0	0	0	0		0	100	100	100		0	0	0	0
UK	UKM5	North Eastern Scotland	10.4895	10	0	0	0	100	0	100	0	100	0	0	0	0		0	0	0	0	0	0	0	0	0	0	0	0		0	100	100	100		0	0	0	0
UK	UKM6	Highlands and Islands	10.4895	10	0	0	0	100	0	100	0	100	0	0	0	0		0	0	0	0	0	0	0	0	0	0	0	0		0	100	100	100		0	0	0	0
UK	UKN0	Northern Ireland	10.4895	10	0	0	0	100	0	100	0	100	0	0	0	0		0	0	0	0	0	0	0	0	0	0	0	0		0	100	100	100		0	0	0	0

## Sheet: Citrus
CITRUS			CRT_SLOPE	CRT_LOSS	CRE_WASTE	CRE_SELF	CRE_>2ha	CRE_COM-S	CRE_>2ha	CRE_COM-M	CRE_>2ha	CRE_COM-L	CRI_COMP	CRI_>0ha	CRI_>2ha	CRI_>5ha		BioTH	BioT	BioE_WASTE	BioE_SELF	BioE_COM-S	BioE_COM-M	BioE_COM-L	BioI_WASTE	BioI_SELF	BioI_COM-S	BioI_COM-M	BioI_COM-L		BioT	CRE_COM			Best economic case	CR BEST Economic	BioE_COM_BEST	GAP = BioT - BioE_COM_BEST
Country	NUTs2	NAME	(%)	(%)	(%)	(%)	(%)	(%)	(%)	(%)	(%)	(%)	(%)	(%)	(%)	(%)		t DM·yr-1	t DM·yr-1	t DM·yr-1	t DM·yr-1	t DM·yr-1	t DM·yr-1	t DM·yr-1	t DM·yr-1	t DM·yr-1	t DM·yr-1	t DM·yr-1	t DM·yr-1		(DM t)	S	M	L		(%)	(DM t)	(DM t)	(%)
AT	AT11	Burgenland (A)	0	10	0	0	0	30.5769	0	72.6573	0	78.8112	0	0	0	0		0	0	0	0	0	0	0	0	0	0	0	0		0	100	100	100		0	0	0	0
AT	AT12	Nieder÷sterreich	0.0217628	10	0	0	0	32.4592	0	73.7106	0	74.3308	0	0	0	0		0	0	0	0	0	0	0	0	0	0	0	0		0	100	100	100		0	0	0	0
AT	AT13	Wien	0	10	0	0	0	100	0	100	0	100	0	0	0	0		0	0	0	0	0	0	0	0	0	0	0	0		0	100	100	100		0	0	0	0
AT	AT21	Kõrnten	0	10	0	0	0	100	0	100	0	100	0	0	0	0		0	0	0	0	0	0	0	0	0	0	0	0		0	100	100	100		0	0	0	0
AT	AT22	Steiermark	0	10	0	0	0	40.3194	0	99.8004	0	100	0	0	0	0		0	0	0	0	0	0	0	0	0	0	0	0		0	100	100	100		0	0	0	0
AT	AT31	Ober÷sterreich	0	10	0	0	0	40.3194	0	99.8004	0	100	0	0	0	0		0	0	0	0	0	0	0	0	0	0	0	0		0	100	100	100		0	0	0	0
AT	AT32	Salzburg	0	10	0	0	0	40.3194	0	99.8004	0	100	0	0	0	0		0	0	0	0	0	0	0	0	0	0	0	0		0	100	100	100		0	0	0	0
AT	AT33	Tirol	0	10	0	0	0	40.3194	0	99.8004	0	100	0	0	0	0		0	0	0	0	0	0	0	0	0	0	0	0		0	100	100	100		0	0	0	0
AT	AT34	Vorarlberg	0	10	0	0	0	40.3194	0	99.8004	0	100	0	0	0	0		0	0	0	0	0	0	0	0	0	0	0	0		0	100	100	100		0	0	0	0
BE	BE10	Region de Bruxelles-Capitalet	0	10	0	0	0	40.3194	0	99.8004	0	100	0	0	0	0		0	0	0	0	0	0	0	0	0	0	0	0		0	100	100	100		0	0	0	0
BE	BE21	Prov. Antwerpen	0	10	0	0	0	100	0	100	0	100	0	0	0	0		0	0	0	0	0	0	0	0	0	0	0	0		0	100	100	100		0	0	0	0
BE	BE22	Prov. Limburg (B)	0	10	0	0	0	2.92612	0	1.68252	0	0.877835	0	0	0	0		0	0	0	0	0	0	0	0	0	0	0	0		0	100	100	100		0	0	0	0
BE	BE23	Prov. Oost-Vlaanderen	0	10	0	0	0	100	0	100	0	100	0	0	0	0		0	0	0	0	0	0	0	0	0	0	0	0		0	100	100	100		0	0	0	0
BE	BE24	Prov. Vlaams-Brabant	0	10	0	0	0	12.2449	0	12.5	0	17.602	0	0	0	0		0	0	0	0	0	0	0	0	0	0	0	0		0	100	100	100		0	0	0	0
BE	BE25	Prov. West-Vlaanderen	0	10	0	0	0	100	0	100	0	100	0	0	0	0		0	0	0	0	0	0	0	0	0	0	0	0		0	100	100	100		0	0	0	0
BE	BE31	Prov. Brabant Wallon	0	10	0	0	0	100	0	100	0	100	0	0	0	0		0	0	0	0	0	0	0	0	0	0	0	0		0	100	100	100		0	0	0	0
BE	BE32	Prov. Hainaut	0	10	0	0	0	100	0	100	0	100	0	0	0	0		0	0	0	0	0	0	0	0	0	0	0	0		0	100	100	100		0	0	0	0
BE	BE33	Prov. LiÞge	0	10	0	0	0	58.5366	0	58.5366	0	42.6829	0	0	0	0		0	0	0	0	0	0	0	0	0	0	0	0		0	100	100	100		0	0	0	0
BE	BE34	Prov. Luxembourg (B)	0	10	0	0	0	58.5366	0	58.5366	0	42.6829	0	0	0	0		0	0	0	0	0	0	0	0	0	0	0	0		0	100	100	100		0	0	0	0
BE	BE35	Prov. Namur	0	10	0	0	0	100	0	100	0	100	0	0	0	0		0	0	0	0	0	0	0	0	0	0	0	0		0	100	100	100		0	0	0	0
BG	BG31	Severozapaden	0.0997133	10	0	0	0	100	0	100	0	100	0	0	0	0		0	0	0	0	0	0	0	0	0	0	0	0		0	100	100	100		0	0	0	0
BG	BG32	Severen tsentralen	0	10	0	0	0	97.6111	0	100	0	100	0	0	0	0		0	0	0	0	0	0	0	0	0	0	0	0		0	100	100	100		0	0	0	0
BG	BG33	Severoiztochen	0	10	0	0	0	99.9785	0	100	0	100	0	0	0	0		0	0	0	0	0	0	0	0	0	0	0	0		0	100	100	100		0	0	0	0
BG	BG34	Yugoiztochen	0.185447	10	0	0	0	75.0088	0	97.651	0	99.7704	0	0	0	0		0	0	0	0	0	0	0	0	0	0	0	0		0	100	100	100		0	0	0	0
BG	BG41	Yugozapaden	0.178663	10	0	0	0	77.5651	0	100	0	100	0	0	0	0		0	0	0	0	0	0	0	0	0	0	0	0		0	100	100	100		0	0	0	0
BG	BG42	Yuzhen tsentralen	0.12842	10	0	0	0	68.3493	0	89.5979	0	100	0	0	0	0		0	0	0	0	0	0	0	0	0	0	0	0		0	100	100	100		0	0	0	0
CY	CY00	Kypros/Kibris	0.827433	10	0	35.6383	35.6383	35.4841	35.6383	64.7864	35.6383	57.3156	0	1.06383	1.65289	1.93548		11899.5	10621	10621	6835.84	4410.2	2407.15	2917.83	10508	6722.85	4337.3	2367.36	2869.61		10621	35.4841	64.7864	57.3156	BioE_COM-S	35.4841	4410.2	6210.77	58.4765
CZ	CZ01	Praha	0	10	0	0	0	100	0	100	0	100	0	0	0	0		0	0	0	0	0	0	0	0	0	0	0	0		0	100	100	100		0	0	0	0
CZ	CZ02	Stredni Cechy	0	10	0	0	0	71.5206	0	100	0	100	0	0	0	0		0	0	0	0	0	0	0	0	0	0	0	0		0	100	100	100		0	0	0	0
CZ	CZ03	Jihozapad	0	10	0	0	0	45.0207	0	100	0	100	0	0	0	0		0	0	0	0	0	0	0	0	0	0	0	0		0	100	100	100		0	0	0	0
CZ	CZ04	Severozapad	0	10	0	0	0	100	0	100	0	100	0	0	0	0		0	0	0	0	0	0	0	0	0	0	0	0		0	100	100	100		0	0	0	0
CZ	CZ05	Severovychod	0	10	0	0	0	61.7722	0	100	0	100	0	0	0	0		0	0	0	0	0	0	0	0	0	0	0	0		0	100	100	100		0	0	0	0
CZ	CZ06	Jihovychod	0	10	0	0	0	92.2699	0	100	0	100	0	0	0	0		0	0	0	0	0	0	0	0	0	0	0	0		0	100	100	100		0	0	0	0
CZ	CZ07	Stredni Morava	0	10	0	0	0	100	0	100	0	100	0	0	0	0		0	0	0	0	0	0	0	0	0	0	0	0		0	100	100	100		0	0	0	0
CZ	CZ08	Moravskoslezsko	0	10	0	0	0	100	0	100	0	100	0	0	0	0		0	0	0	0	0	0	0	0	0	0	0	0		0	100	100	100		0	0	0	0
DE	DE11	Stuttgart	0	10	0	0	0	70.0523	0	100	0	100	0	0	0	0		0	0	0	0	0	0	0	0	0	0	0	0		0	100	100	100		0	0	0	0
DE	DE12	Karlsruhe	0	10	0	0	0	90.8028	0	97.6928	0	93.11	0	0	0	0		0	0	0	0	0	0	0	0	0	0	0	0		0	100	100	100		0	0	0	0
DE	DE13	Freiburg	0	10	0	0	0	14.2318	0	43.3704	0	46.7447	0	0	0	0		0	0	0	0	0	0	0	0	0	0	0	0		0	100	100	100		0	0	0	0
DE	DE14	Tübingen	0	10	0	0	0	33.8741	0	84.0363	0	95.7495	0	0	0	0		0	0	0	0	0	0	0	0	0	0	0	0		0	100	100	100		0	0	0	0
DE	DE21	Oberbayern	0	10	0	0	0	100	0	100	0	100	0	0	0	0		0	0	0	0	0	0	0	0	0	0	0	0		0	100	100	100		0	0	0	0
DE	DE22	Niederbayern	0	10	0	0	0	100	0	100	0	100	0	0	0	0		0	0	0	0	0	0	0	0	0	0	0	0		0	100	100	100		0	0	0	0
DE	DE23	Oberpfalz	0	10	0	0	0	100	0	100	0	100	0	0	0	0		0	0	0	0	0	0	0	0	0	0	0	0		0	100	100	100		0	0	0	0
DE	DE24	Oberfranken	0	10	0	0	0	14.876	0	100	0	100	0	0	0	0		0	0	0	0	0	0	0	0	0	0	0	0		0	100	100	100		0	0	0	0
DE	DE25	Mittelfranken	0	10	0	0	0	100	0	100	0	100	0	0	0	0		0	0	0	0	0	0	0	0	0	0	0	0		0	100	100	100		0	0	0	0
DE	DE26	Unterfranken	0	10	0	0	0	62.2305	0	100	0	100	0	0	0	0		0	0	0	0	0	0	0	0	0	0	0	0		0	100	100	100		0	0	0	0
DE	DE27	Schwaben	0	10	0	0	0	0	0	36.5297	0	100	0	0	0	0		0	0	0	0	0	0	0	0	0	0	0	0		0	100	100	100		0	0	0	0
DE	DE30	Berlin	0	10	0	0	0	0	0	36.5297	0	100	0	0	0	0		0	0	0	0	0	0	0	0	0	0	0	0		0	100	100	100		0	0	0	0
DE	DE40	Brandenburg	0	10	0	0	0	32.6327	0	85.3982	0	100	0	0	0	0		0	0	0	0	0	0	0	0	0	0	0	0		0	100	100	100		0	0	0	0
DE	DE50	Bremen	0	10	0	0	0	32.6327	0	85.3982	0	100	0	0	0	0		0	0	0	0	0	0	0	0	0	0	0	0		0	100	100	100		0	0	0	0
DE	DE60	Hamburg	0	10	0	0	0	0	0	17.0029	0	3.45821	0	0	0	0		0	0	0	0	0	0	0	0	0	0	0	0		0	100	100	100		0	0	0	0
DE	DE71	Darmstadt	0	10	0	0	0	60.9778	0	59.8222	0	57.3333	0	0	0	0		0	0	0	0	0	0	0	0	0	0	0	0		0	100	100	100		0	0	0	0
DE	DE72	Gießen	0	10	0	0	0	100	0	100	0	100	0	0	0	0		0	0	0	0	0	0	0	0	0	0	0	0		0	100	100	100		0	0	0	0
DE	DE73	Kassel	0	10	0	0	0	100	0	100	0	100	0	0	0	0		0	0	0	0	0	0	0	0	0	0	0	0		0	100	100	100		0	0	0	0
DE	DE80	Mecklenburg-Vorpommern	0	10	0	0	0	78.1193	0	100	0	100	0	0	0	0		0	0	0	0	0	0	0	0	0	0	0	0		0	100	100	100		0	0	0	0
DE	DE91	Braunschweig	0	10	0	0	0	78.1193	0	100	0	100	0	0	0	0		0	0	0	0	0	0	0	0	0	0	0	0		0	100	100	100		0	0	0	0
DE	DE92	Hannover	0	10	0	0	0	78.1193	0	100	0	100	0	0	0	0		0	0	0	0	0	0	0	0	0	0	0	0		0	100	100	100		0	0	0	0
DE	DE93	Lüneburg	0	10	0	0	0	8.22245	0	10.8837	0	9.38246	0	0	0	0		0	0	0	0	0	0	0	0	0	0	0	0		0	100	100	100		0	0	0	0
DE	DE94	Weser-Ems	0	10	0	0	0	8.22245	0	10.8837	0	9.38246	0	0	0	0		0	0	0	0	0	0	0	0	0	0	0	0		0	100	100	100		0	0	0	0
DE	DEA1	Düsseldorf	0	10	0	0	0	100	0	100	0	100	0	0	0	0		0	0	0	0	0	0	0	0	0	0	0	0		0	100	100	100		0	0	0	0
DE	DEA2	Köln	0	10	0	0	0	11.2224	0	14.4289	0	100	0	0	0	0		0	0	0	0	0	0	0	0	0	0	0	0		0	100	100	100		0	0	0	0
DE	DEA3	Münster	0	10	0	0	0	11.2224	0	14.4289	0	100	0	0	0	0		0	0	0	0	0	0	0	0	0	0	0	0		0	100	100	100		0	0	0	0
DE	DEA4	Detmold	0	10	0	0	0	11.2224	0	14.4289	0	100	0	0	0	0		0	0	0	0	0	0	0	0	0	0	0	0		0	100	100	100		0	0	0	0
DE	DEA5	Arnsberg	0	10	0	0	0	11.2224	0	14.4289	0	100	0	0	0	0		0	0	0	0	0	0	0	0	0	0	0	0		0	100	100	100		0	0	0	0
DE	DEB1	Koblenz	0	10	0	0	0	92.1376	0	94.226	0	98.8943	0	0	0	0		0	0	0	0	0	0	0	0	0	0	0	0		0	100	100	100		0	0	0	0
DE	DEB2	Trier	0	10	0	0	0	100	0	100	0	100	0	0	0	0		0	0	0	0	0	0	0	0	0	0	0	0		0	100	100	100		0	0	0	0
DE	DEB3	Rheinhessen-Pfalz	0	10	0	0	0	3.80239	0	5.62862	0	2.35775	0	0	0	0		0	0	0	0	0	0	0	0	0	0	0	0		0	100	100	100		0	0	0	0
DE	DEC0	Saarland	0	10	0	0	0	100	0	100	0	100	0	0	0	0		0	0	0	0	0	0	0	0	0	0	0	0		0	100	100	100		0	0	0	0
DE	DED2	Dresden	0	10	0	0	0	23.6559	0	23.8351	0	100	0	0	0	0		0	0	0	0	0	0	0	0	0	0	0	0		0	100	100	100		0	0	0	0
DE	DED4	Chemnitz	0	10	0	0	0	72.5664	0	100	0	100	0	0	0	0		0	0	0	0	0	0	0	0	0	0	0	0		0	100	100	100		0	0	0	0
DE	DED5	Leipzig	0	10	0	0	0	36.4662	0	100	0	100	0	0	0	0		0	0	0	0	0	0	0	0	0	0	0	0		0	100	100	100		0	0	0	0
DE	DEE0	Sachsen-Anhalt	0	10	0	0	0	84.9143	0	100	0	100	0	0	0	0		0	0	0	0	0	0	0	0	0	0	0	0		0	100	100	100		0	0	0	0
DE	DEF0	Schleswig-Holstein	0	10	0	0	0	24.6154	0	24.6154	0	24.6154	0	0	0	0		0	0	0	0	0	0	0	0	0	0	0	0		0	100	100	100		0	0	0	0
DE	DEG0	Thüringen	0	10	0	0	0	45.6897	0	100	0	100	0	0	0	0		0	0	0	0	0	0	0	0	0	0	0	0		0	100	100	100		0	0	0	0
DK	DK01	Hovedstaden	0	10	0	0	0	100	0	100	0	100	0	0	0	0		0	0	0	0	0	0	0	0	0	0	0	0		0	100	100	100		0	0	0	0
DK	DK02	Sjaelland	0	10	0	0	0	42	0	100	0	100	0	0	0	0		0	0	0	0	0	0	0	0	0	0	0	0		0	100	100	100		0	0	0	0
DK	DK03	Syddanmark	0	10	0	0	0	100	0	100	0	100	0	0	0	0		0	0	0	0	0	0	0	0	0	0	0	0		0	100	100	100		0	0	0	0
DK	DK04	Midtjylland	0	10	0	0	0	100	0	100	0	100	0	0	0	0		0	0	0	0	0	0	0	0	0	0	0	0		0	100	100	100		0	0	0	0
DK	DK05	Nordjylland	0	10	0	0	0	100	0	100	0	100	0	0	0	0		0	0	0	0	0	0	0	0	0	0	0	0		0	100	100	100		0	0	0	0
EE	EE00	Eesti	0	10	0	0	0	100	0	100	0	100	0	0	0	0		0	0	0	0	0	0	0	0	0	0	0	0		0	100	100	100		0	0	0	0
EL	EL30	Attiki	0	10	0	32.967	32.967	100	32.967	100	32.967	100	0	12.0879	16.3934	21.2121		1806.59	1625.93	1625.93	1089.91	0	0	0	1429.39	911.236	0	0	0		1625.93	100	100	100		100	0	1625.93	100
EL	EL41	Voreio Aigaio	0	10	0	45.283	45.283	100	45.283	100	45.283	100	0	5.66038	6.89655	16.6667		789.56	710.604	710.604	388.821	0	0	0	670.381	362.006	0	0	0		710.604	100	100	100		100	0	710.604	100
EL	EL42	Notio Aigaio	0	10	0	48.913	48.913	100	48.913	100	48.913	100	0	0	0	0		2631.74	2368.57	2368.57	1210.03	0	0	0	2368.57	1210.03	0	0	0		2368.57	100	100	100		100	0	2368.57	100
EL	EL43	Kriti	0	10	0	34.1902	34.1902	100	34.1902	100	34.1902	100	0	2.31362	3.125	5.82524		9991.22	8992.1	8992.1	5917.68	0	0	0	8784.06	5732.75	0	0	0		8992.1	100	100	100		100	0	8992.1	100
EL	EL51	Anatoliki Makedonia, Thraki	0	10	0	0	0	100	0	100	0	100	0	0	0	0		0	0	0	0	0	0	0	0	0	0	0	0		0	100	100	100		0	0	0	0
EL	EL52	Kentriki Makedonia	0	10	0	0	0	0	0	0	0	0	0	0	0	0		40.3335	36.3001	36.3001	36.3001	36.3001	36.3001	36.3001	36.3001	36.3001	36.3001	36.3001	36.3001		36.3001	100	100	100	BioE_COM-S & BioE_COM-M & BioE_COM-L	0	36.3001	0	0
EL	EL53	Dytiki Makedonia	0	10	0	0	0	0	0	0	0	0	0	0	0	0		0	0	0	0	0	0	0	0	0	0	0	0		0	100	100	100		0	0	0	0
EL	EL54	Ipeiros	0	10	0	40.3654	40.3654	0	40.3654	0	40.3654	0	0	0.996678	1.67131	2.54777		8740.04	7866.04	7866.04	4690.88	4690.88	4690.88	4690.88	7787.64	4612.48	4612.48	4612.48	4612.48		7866.04	0	0	0	BioE_COM-S & BioE_COM-M & BioE_COM-L	0	4690.88	3175.16	40.3654
EL	EL61	Thessalia	0	10	0	50	50	0	50	0	50	0	0	0	0	0		58.5353	52.6818	52.6818	26.3409	26.3409	26.3409	26.3409	52.6818	26.3409	26.3409	26.3409	26.3409		52.6818	0	0	0	BioE_COM-S & BioE_COM-M & BioE_COM-L	0	26.3409	26.3409	50
EL	EL62	Ionia Nisia	0	10	0	47.7612	47.7612	0	47.7612	0	47.7612	0	0	0	0	0		1135.7	1022.13	1022.13	533.946	533.946	533.946	533.946	1022.13	533.946	533.946	533.946	533.946		1022.13	0	0	0	BioE_COM-S & BioE_COM-M & BioE_COM-L	0	533.946	488.179	47.7612
EL	EL63	Dytiki Ellada	0	10	0	29.4416	29.4416	0	29.4416	0	29.4416	0	0	8.75635	11.5108	15.9021		13959.5	12563.5	12563.5	8864.63	8864.63	8864.63	8864.63	11463.4	7844.24	7844.24	7844.24	7844.24		12563.5	0	0	0	BioE_COM-S & BioE_COM-M & BioE_COM-L	0	8864.63	3698.91	29.4416
EL	EL64	Sterea Ellada	0	10	0	43.2432	43.2432	0	43.2432	0	43.2432	0	0	2.7027	4.7619	11.1111		634.03	570.627	570.627	323.87	323.87	323.87	323.87	555.205	308.447	308.447	308.447	308.447		570.627	0	0	0	BioE_COM-S & BioE_COM-M & BioE_COM-L	0	323.87	246.758	43.2432
EL	EL65	Peloponnisos	0	10	0	26.186	26.186	0	26.186	0	26.186	0	0	2.93023	3.59168	5.5336		36440.1	32796	32796	24208.1	24208.1	24208.1	24208.1	31835	23338.6	23338.6	23338.6	23338.6		32796	0	0	0	BioE_COM-S & BioE_COM-M & BioE_COM-L	0	24208.1	8587.99	26.186
ES	ES11	Galicia	1.20846	10	0	36.3636	36.3636	29.3051	36.3636	51.5861	36.3636	99.7734	5	0	0	0		145.2	129.101	129.101	82.155	58.0794	39.7745	0.186152	122.646	78.0473	55.1754	37.7857	0.176844		129.101	29.3051	51.5861	99.7734	BioE_COM-S	29.3051	58.0794	71.0214	55.0124
ES	ES12	Principado de Asturias	0	10	0	0	0	56.25	0	100	0	100	5	0	0	0		66	59.4	59.4	59.4	25.9875	0	0	56.43	56.43	24.6881	0	0		59.4	100	100	100	BioE_COM-S	56.25	25.9875	33.4125	56.25
ES	ES13	Cantabria	0	10	0	0	0	56.25	0	100	0	100	5	0	0	0		13.2	11.88	11.88	11.88	5.1975	0	0	11.286	11.286	4.93763	0	0		11.88	100	100	100	BioE_COM-S	56.25	5.1975	6.6825	56.25
ES	ES21	País Vasco	0	10	0	0	0	0.247001	0	0	0	0	5	0	0	0		26.4	23.76	23.76	23.76	23.7013	23.76	23.76	22.572	22.572	22.5162	22.572	22.572		23.76	100	100	100	BioE_COM-M & BioE_COM-L	0	23.76	0	0
ES	ES22	Comunidad Foral de Navarra	0.0254453	10	0	0	0	20.9924	0	45.1908	0	37.659	5	0	0	0		0	0	0	0	0	0	0	0	0	0	0	0		0	100	100	100		0	0	0	0
ES	ES23	La Rioja	0.00898715	10	0	0	0	4.09814	0	10.1735	0	3.92738	5	0	0	0		0	0	0	0	0	0	0	0	0	0	0	0		0	100	100	100		0	0	0	0
ES	ES24	Arag¾n	0.0102912	10	0	0	0	13.0596	0	28.9132	0	30.0864	5	0	0	0		0	0	0	0	0	0	0	0	0	0	0	0		0	100	100	100		0	0	0	0
ES	ES30	Comunidad de Madrid	0	10	0	0	0	46.3636	0	59.8701	0	40.4416	5	0	0	0		0	0	0	0	0	0	0	0	0	0	0	0		0	100	100	100		0	0	0	0
ES	ES41	Castilla y Le¾n	0.22495	10	0	0	0	46.4876	0	74.4199	0	87.917	5	0	0	0		0	0	0	0	0	0	0	0	0	0	0	0		0	100	100	100		0	0	0	0
ES	ES42	Castilla-La Mancha	0.0302138	10	0	50	50	20.4799	50	38.1331	50	24.2692	5	0	0	0		26.4336	23.783	23.783	11.8915	9.45614	7.35691	9.00554	22.5939	11.2969	8.98334	6.98906	8.55526		23.783	20.4799	38.1331	24.2692	BioE_COM-S	20.4799	9.45614	14.3269	60.2399
ES	ES43	Extremadura	0.692464	10	0	10.3448	10.3448	10.6947	10.3448	25.1776	10.3448	16.9224	5	0	0	0		427.486	382.073	382.073	342.548	305.914	256.303	284.581	362.969	325.421	290.618	243.488	270.352		382.073	10.6947	25.1776	16.9224	BioE_COM-S	10.6947	305.914	76.1594	19.9332
ES	ES51	Cataluña	0.328135	10	0	5.84291	5.84291	4.75202	5.84291	9.15614	5.84291	5.1276	5	1.62835	1.7294	1.96759		14504.1	13010.9	13010.9	12250.7	11668.5	11129	11622.5	12159.1	11436.9	10893.4	10389.7	10850.4		13010.9	4.75202	9.15614	5.1276	BioE_COM-S	4.75202	11668.5	1342.37	10.3173
ES	ES52	Comunidad Valenciana	0.155739	10	0	19.9387	19.9387	52.3175	19.9387	69.1924	19.9387	58.2584	5	0.606703	0.721012	0.901984		314348	282473	282473	226151	107835	69671.8	94399.3	266721	213295	101704	65710.9	89032.8		282473	52.3175	69.1924	58.2584	BioE_COM-S	52.3175	107835	174638	61.8248
ES	ES53	Illes Balears	0.822888	10	0	13.5593	13.5593	11.4892	13.5593	19.9715	13.5593	16.7459	5	1.69492	1.96078	2.47934		2446.34	2183.59	2183.59	1887.51	1670.65	1510.54	1571.43	2039.25	1757.97	1555.99	1406.88	1463.58		2183.59	11.4892	19.9715	16.7459	BioE_COM-S	11.4892	1670.65	512.938	23.4907
ES	ES61	Andalucía	0.695187	10	0	3.88873	3.88873	9.26462	3.88873	14.7899	3.88873	10.4232	5	3.67584	3.4997	3.21065		145912	130408	130408	125337	113725	106799	112273	119334	114903	104257	97908.7	102926		130408	9.26462	14.7899	10.4232	BioE_COM-S	9.26462	113725	16683.2	12.7931
ES	ES62	Regi¾n de Murcia	0.0569653	10	0	10.2017	10.2017	33.8607	10.2017	71.5873	10.2017	37.4987	5	1.42349	1.5852	1.76926		64574.7	58084.1	58084.1	52158.6	34497.3	14819.7	32599.8	54394.4	48765.2	32252.9	13855.5	30478.9		58084.1	33.8607	71.5873	37.4987	BioE_COM-S	33.8607	34497.3	23586.8	40.608
ES	ES63	Ciudad Autónoma de Ceuta	0.0569653	10	0	0	0	33.8607	0	71.5873	0	37.4987	5	0	0	0		0	0	0	0	0	0	0	0	0	0	0	0		0	100	100	100		0	0	0	0
ES	ES64	Ciudad Autónoma de Melilla	0.0569653	10	0	0	0	33.8607	0	71.5873	0	37.4987	5	0	0	0		0	0	0	0	0	0	0	0	0	0	0	0		0	100	100	100		0	0	0	0
ES	ES70	Canarias	17.6986	10	0	22.2222	22.2222	39.76	22.2222	84.4351	22.2222	92.1318	5	2.22222	2.85714	2		3379.22	2503.03	2503.03	1946.8	1172.76	303.017	153.178	2325.04	1796.62	1082.29	279.642	141.361		2503.03	39.76	84.4351	92.1318	BioE_COM-S	39.76	1172.76	1330.28	53.1466
FI	FI19	Lõnsi-Suomi	17.6986	10	0	0	0	39.76	0	84.4351	0	92.1318	0	0	0	0		0	0	0	0	0	0	0	0	0	0	0	0		0	100	100	100		0	0	0	0
FI	FI1B	Helsinki-Uusimaa	17.6986	10	0	0	0	39.76	0	84.4351	0	92.1318	0	0	0	0		0	0	0	0	0	0	0	0	0	0	0	0		0	100	100	100		0	0	0	0
FI	FI1C	Etelõ-Suomi	17.6986	10	0	0	0	39.76	0	84.4351	0	92.1318	0	0	0	0		0	0	0	0	0	0	0	0	0	0	0	0		0	100	100	100		0	0	0	0
FI	FI1D	Pohjois- ja Suomi	17.6986	10	0	0	0	39.76	0	84.4351	0	92.1318	0	0	0	0		0	0	0	0	0	0	0	0	0	0	0	0		0	100	100	100		0	0	0	0
FI	FI20	┼land	17.6986	10	0	0	0	39.76	0	84.4351	0	92.1318	0	0	0	0		0	0	0	0	0	0	0	0	0	0	0	0		0	100	100	100		0	0	0	0
FR	FR10	Ille-de-France	0	10	0	0	0	100	0	100	0	100	2.5	0	0	0		0	0	0	0	0	0	0	0	0	0	0	0		0	100	100	100		0	0	0	0
FR	FR21	Champagne-Ardenne	0	10	0	0	0	26.8608	0	51.2204	0	56.6941	2.5	0	0	0		0	0	0	0	0	0	0	0	0	0	0	0		0	100	100	100		0	0	0	0
FR	FR22	Picardie	0	10	0	0	0	68.9829	0	100	0	100	2.5	0	0	0		0	0	0	0	0	0	0	0	0	0	0	0		0	100	100	100		0	0	0	0
FR	FR23	Haute-Normandie	0	10	0	0	0	100	0	100	0	100	2.5	0	0	0		0	0	0	0	0	0	0	0	0	0	0	0		0	100	100	100		0	0	0	0
FR	FR24	Centre	0	10	0	0	0	37.2515	0	92.6722	0	89.9561	2.5	0	0	0		0	0	0	0	0	0	0	0	0	0	0	0		0	100	100	100		0	0	0	0
FR	FR25	Basse-Normandie	0	10	0	0	0	35.6522	0	100	0	100	2.5	0	0	0		0	0	0	0	0	0	0	0	0	0	0	0		0	100	100	100		0	0	0	0
FR	FR26	Bourgogne	0	10	0	0	0	7.2456	0	33.2978	0	48.082	2.5	0	0	0		0	0	0	0	0	0	0	0	0	0	0	0		0	100	100	100		0	0	0	0
FR	FR30	Nord - Pas-de-Calais	0	10	0	0	0	100	0	100	0	100	2.5	0	0	0		0	0	0	0	0	0	0	0	0	0	0	0		0	100	100	100		0	0	0	0
FR	FR41	Lorraine	0	10	0	0	0	100	0	100	0	100	2.5	0	0	0		0	0	0	0	0	0	0	0	0	0	0	0		0	100	100	100		0	0	0	0
FR	FR42	Alsace	0	10	0	0	0	31.685	0	44.8174	0	62.8132	2.5	0	0	0		0	0	0	0	0	0	0	0	0	0	0	0		0	100	100	100		0	0	0	0
FR	FR43	Franche-ComtÚ	0	10	0	0	0	74.5474	0	100	0	100	2.5	0	0	0		0	0	0	0	0	0	0	0	0	0	0	0		0	100	100	100		0	0	0	0
FR	FR51	Pays de la Loire	0	10	0	0	0	30.0082	0	49.624	0	43.8344	2.5	0	0	0		0	0	0	0	0	0	0	0	0	0	0	0		0	100	100	100		0	0	0	0
FR	FR52	Bretagne	0	10	0	0	0	0	0	100	0	100	2.5	0	0	0		0	0	0	0	0	0	0	0	0	0	0	0		0	100	100	100		0	0	0	0
FR	FR53	Poitou-Charentes	0.0360008	10	0	0	0	14.3335	0	23.7657	0	12.7546	2.5	0	0	0		0	0	0	0	0	0	0	0	0	0	0	0		0	100	100	100		0	0	0	0
FR	FR61	Aquitaine	0.057869	10	0	0	0	5.62776	0	10.0065	0	6.31736	2.5	0	0	0		0	0	0	0	0	0	0	0	0	0	0	0		0	100	100	100		0	0	0	0
FR	FR62	Midi-PyrÚnÚes	0.117193	10	0	0	0	16.3932	0	35.6128	0	24.0452	2.5	0	0	0		0	0	0	0	0	0	0	0	0	0	0	0		0	100	100	100		0	0	0	0
FR	FR63	Limousin	0	10	0	0	0	40.056	0	76.4706	0	100	2.5	0	0	0		0	0	0	0	0	0	0	0	0	0	0	0		0	100	100	100		0	0	0	0
FR	FR71	Rh¶ne-Alpes	0.987429	10	0	0	0	15.8903	0	33.888	0	30.2583	2.5	0	0	0		0	0	0	0	0	0	0	0	0	0	0	0		0	100	100	100		0	0	0	0
FR	FR72	Auvergne	0	10	0	0	0	100	0	100	0	100	2.5	0	0	0		0	0	0	0	0	0	0	0	0	0	0	0		0	100	100	100		0	0	0	0
FR	FR81	Languedoc-Roussillon	0.144418	10	0	0	0	4.76581	0	8.86176	0	2.4674	2.5	0	0	0		0	0	0	0	0	0	0	0	0	0	0	0		0	100	100	100		0	0	0	0
FR	FR82	Provence-Alpes-C¶te d'Azur	0.250887	10	0	50	50	13.3122	50	28.1424	50	20.2838	2.5	0	0	0		39.6	35.5506	35.5506	17.7753	15.409	12.7729	14.1698	34.6618	17.3309	15.0238	12.4536	13.8155		35.5506	13.3122	28.1424	20.2838	BioE_COM-S	13.3122	15.409	20.1416	56.6561
FR	FR83	Corse	0.593575	10	0	0	0	35.5796	0	69.9721	0	100	2.5	8.99471	8.99471	9.28962		2494.8	2231.99	2231.99	2231.99	1437.86	670.221	0	1980.45	1980.45	1275.81	594.688	0		2231.99	100	100	100	BioE_COM-S	35.5796	1437.86	794.134	35.5796
FR	FRA1	Guadeloupe	0.593575	10	0	17.1429	17.1429	35.5796	17.1429	69.9721	17.1429	100	2.5	0	0	0		1973.27	1765.4	1765.4	1462.76	942.317	439.237	0	1721.27	1426.19	918.759	428.256	0		1765.4	35.5796	69.9721	100	BioE_COM-S	35.5796	942.317	823.085	46.6231
FR	FRA2	Martinique	0.593575	10	0	5.88235	5.88235	35.5796	5.88235	69.9721	5.88235	100	2.5	0	0	0		1788.37	1599.98	1599.98	1505.87	970.085	452.18	0	1559.98	1468.22	945.832	440.876	0		1599.98	35.5796	69.9721	100	BioE_COM-S	35.5796	970.085	629.898	39.369
FR	FRA3	Guyane	0.593575	10	0	12.605	12.605	35.5796	12.605	69.9721	12.605	100	2.5	0	0	0		5867.31	5249.24	5249.24	4587.57	2955.33	1377.55	0	5118.01	4472.88	2881.45	1343.11	0		5249.24	35.5796	69.9721	100	BioE_COM-S	35.5796	2955.33	2293.91	43.6998
FR	FRA4	RÚunion	0.593575	10	0	25.8065	25.8065	35.5796	25.8065	69.9721	25.8065	100	2.5	0	0	0		1436.58	1285.24	1285.24	953.568	614.292	286.337	0	1253.11	929.729	598.935	279.178	0		1285.24	35.5796	69.9721	100	BioE_COM-S	35.5796	614.292	670.952	52.2042
HR	HR03	Jadranska Hrvatska	5.00495	10	0	54.2105	54.2105	52.1563	54.2105	92.087	54.2105	100	0	54.2105	100	100		2494.82	2132.96	2132.96	976.67	467.275	77.2835	0	976.67	0	0	0	0		2132.96	52.1563	92.087	100	BioE_COM-S	52.1563	467.275	1665.68	78.0926
HR	HR04	Kontinentalna Hrvatska	0	10	0	0	0	19.6388	0	80.6321	0	100	0	0	0	0		0	0	0	0	0	0	0	0	0	0	0	0		0	100	100	100		0	0	0	0
HU	HU10	Közép-Magyarország	0	10	0	0	0	53.238	0	99.4603	0	100	0	0	0	0		0	0	0	0	0	0	0	0	0	0	0	0		0	100	100	100		0	0	0	0
HU	HU21	Közép-Dunántúl	0	10	0	0	0	88.6598	0	100	0	100	0	0	0	0		0	0	0	0	0	0	0	0	0	0	0	0		0	100	100	100		0	0	0	0
HU	HU22	Nyugat-Dunántúl	0	10	0	0	0	92.598	0	100	0	100	0	0	0	0		0	0	0	0	0	0	0	0	0	0	0	0		0	100	100	100		0	0	0	0
HU	HU23	Dél-Dunántúl	0	10	0	0	0	70.5856	0	99.9404	0	100	0	0	0	0		0	0	0	0	0	0	0	0	0	0	0	0		0	100	100	100		0	0	0	0
HU	HU31	Észak-Magyarország	0	10	0	0	0	38.3548	0	91.1837	0	99.449	0	0	0	0		0	0	0	0	0	0	0	0	0	0	0	0		0	100	100	100		0	0	0	0
HU	HU32	Észak-Alföld	0	10	0	0	0	25.7606	0	43.2429	0	26.1133	0	0	0	0		0	0	0	0	0	0	0	0	0	0	0	0		0	100	100	100		0	0	0	0
HU	HU33	Dél-Alföld	0	10	0	0	0	32.1212	0	58.3377	0	43.8182	0	0	0	0		0	0	0	0	0	0	0	0	0	0	0	0		0	100	100	100		0	0	0	0
IE	IE01	Border, Midland and Western	0	10	0	0	0	32.1212	0	58.3377	0	43.8182	0	0	0	0		0	0	0	0	0	0	0	0	0	0	0	0		0	100	100	100		0	0	0	0
IE	IE02	Southern and Eastern	0	10	0	0	0	32.1212	0	58.3377	0	43.8182	0	0	0	0		0	0	0	0	0	0	0	0	0	0	0	0		0	100	100	100		0	0	0	0
IT	ITC1	Piemonte	0.217174	10	0	100	100	5.9224	100	10.6239	100	12.5902	0	0	0	0		13.2	11.8542	11.8542	0	0	0	0	11.8542	0	0	0	0		11.8542	5.9224	10.6239	12.5902		5.9224	0	11.8542	100
IT	ITC2	Valle d'Aosta/VallÚe d'Aoste	23.4848	10	0	0	0	100	0	100	0	100	0	0	0	0		0	0	0	0	0	0	0	0	0	0	0	0		0	100	100	100		0	0	0	0
IT	ITC3	Liguria	5.53111	10	0	80	80	41.0434	80	52.7656	80	53.4884	0	0	0	0		66	56.1145	56.1145	11.2229	6.61665	5.30108	5.21996	56.1145	11.2229	6.61665	5.30108	5.21996		56.1145	41.0434	52.7656	53.4884	BioE_COM-S	41.0434	6.61665	49.4979	88.2087
IT	ITC4	Lombardia	4.37391	10	0	0	0	13.4466	0	26.0685	0	21.3697	0	0	0	0		0	0	0	0	0	0	0	0	0	0	0	0		0	100	100	100		0	0	0	0
IT	ITF1	Abruzzo	1.25987	10	0	33.3333	33.3333	9.26953	33.3333	16.7309	33.3333	11.8154	0	0	0	0		26.4	23.4607	23.4607	15.6404	14.1906	13.0237	13.7925	23.4607	15.6404	14.1906	13.0237	13.7925		23.4607	9.26953	16.7309	11.8154	BioE_COM-S	9.26953	14.1906	9.27001	39.513
IT	ITF2	Molise	0.689655	10	0	0	0	14.063	0	29.5052	0	24.7676	0	0	0	0		26.4	23.5961	23.5961	23.5961	20.2778	16.634	17.7519	23.5961	23.5961	20.2778	16.634	17.7519		23.5961	100	100	100	BioE_COM-S	14.063	20.2778	3.31832	14.063
IT	ITF3	Campania	2.94054	10	0	49.7297	49.7297	11.2469	49.7297	20.448	49.7297	9.85529	0	5.40541	8.60215	12.5		2442.62	2133.72	2133.72	1072.63	951.989	853.295	966.915	2018.38	980.357	870.097	779.893	883.74		2133.72	11.2469	20.448	9.85529	BioE_COM-L	9.85529	966.915	1166.8	54.684
IT	ITF4	Puglia	0.425932	10	0	14.8069	14.8069	1.94955	14.8069	4.63333	14.8069	3.35229	0	10.3004	11.9647	15.1316		12407.8	11119.5	11119.5	9473.01	9288.33	9034.09	9155.45	9974.1	8339.59	8177	7953.19	8060.02		11119.5	1.94955	4.63333	3.35229	BioE_COM-S	1.94955	9288.33	1831.12	16.4678
IT	ITF5	Basilicata	0.460429	10	0	8.38509	8.38509	26.7049	8.38509	42.8096	8.38509	23.6302	0	25.7764	27.9661	31.6456		8505.57	7619.77	7619.77	6980.84	5116.62	3992.37	5331.25	5655.67	5028.57	3685.7	2875.86	3840.31		7619.77	26.7049	42.8096	23.6302	BioE_COM-L	23.6302	5331.25	2288.51	30.0339
IT	ITF6	Calabria	1.16964	10	0	17.1355	17.1355	4.15599	17.1355	7.19301	17.1355	3.77383	0	25.5754	30.5556	35.9228		61022.3	54277.7	54277.7	44976.9	43107.7	41741.7	43279.6	40395.9	31234	29935.9	28987.3	30055.3		54277.7	4.15599	7.19301	3.77383	BioE_COM-L	3.77383	43279.6	10998.1	20.2627
IT	ITG1	Sicilia	1.77257	10	0	17.7984	17.7984	23.1852	17.7984	36.9344	17.7984	22.2833	0	15.7318	18.8986	22.4931		132514	117149	117149	96298.2	73971.2	60731	74839.8	98719.2	78099.2	59991.7	49253.7	60696.1		117149	23.1852	36.9344	22.2833	BioE_COM-L	22.2833	74839.8	42309	36.1156
IT	ITG2	Sardegna	0.271239	10	0	16.0976	16.0976	31.0084	16.0976	60.6219	16.0976	73.283	0	4.14634	4.94186	6.17761		5543.81	4975.9	4975.9	4174.9	2880.33	1644	1115.41	4769.58	3968.58	2737.99	1562.75	1060.29		4975.9	31.0084	60.6219	73.283	BioE_COM-S	31.0084	2880.33	2095.57	42.1144
IT	ITH1	Provincia Autonoma Bolzano/Bozen	18.7184	10	0	0	0	2.60764	0	5.21528	0	9.82414	0	0	0	0		0	0	0	0	0	0	0	0	0	0	0	0		0	100	100	100		0	0	0	0
IT	ITH2	Provincia Autonoma Trento	17.3829	10	0	0	0	15.4273	0	23.0082	0	13.3752	0	0	0	0		13.2	9.81491	9.81491	9.81491	8.30073	7.55668	8.50215	9.81491	9.81491	8.30073	7.55668	8.50215		9.81491	100	100	100	BioE_COM-L	13.3752	8.50215	1.31276	13.3752
IT	ITH3	Veneto	2.97166	10	0	33.3333	33.3333	7.03257	33.3333	11.6751	33.3333	9.78215	0	0	0	0		13.2	11.527	11.527	7.68464	7.14422	6.78745	6.93292	11.527	7.68464	7.14422	6.78745	6.93292		11.527	7.03257	11.6751	9.78215	BioE_COM-S	7.03257	7.14422	4.38275	38.0217
IT	ITH4	Friuli-Venezia Giulia	0	10	0	0	0	20.5025	0	38.4029	0	48.6765	0	0	0	0		0	0	0	0	0	0	0	0	0	0	0	0		0	100	100	100		0	0	0	0
IT	ITH5	Emilia-Romagna	0.0263852	10	0	0	0	17.1768	0	29.1293	0	24.7493	0	0	0	0		0	0	0	0	0	0	0	0	0	0	0	0		0	100	100	100		0	0	0	0
IT	ITI1	Toscana	0.451054	10	0	14.2857	14.2857	14.3174	14.2857	30.4814	14.2857	21.3088	0	0	0	0		92.4	82.7849	82.7849	70.9585	60.7991	49.3294	55.8381	82.7849	70.9585	60.7991	49.3294	55.8381		82.7849	14.3174	30.4814	21.3088	BioE_COM-S	14.3174	60.7991	21.9858	26.5578
IT	ITI2	Umbria	2.66376	10	0	0	0	22.0524	0	65.6914	0	53.0713	0	0	0	0		0	0	0	0	0	0	0	0	0	0	0	0		0	100	100	100		0	0	0	0
IT	ITI3	Marche	0	10	0	0	0	64.5556	0	88	0	93.2222	0	0	0	0		52.8	47.52	47.52	47.52	16.8432	5.7024	3.2208	47.52	47.52	16.8432	5.7024	3.2208		47.52	100	100	100	BioE_COM-S	64.5556	16.8432	30.6768	64.5556
IT	ITI4	Lazio	2.8532	10	0	44.0678	44.0678	13.9902	44.0678	34.8754	44.0678	30.3477	0	10.1695	18.1818	33.3333		778.8	680.921	680.921	380.854	327.572	248.03	265.274	611.675	311.608	268.013	202.934	217.042		680.921	13.9902	34.8754	30.3477	BioE_COM-S	13.9902	327.572	353.349	51.8928
LT	LT00	Lietuva	0	10	0	0	0	42.0103	0	100	0	100	0	0	0	0		0	0	0	0	0	0	0	0	0	0	0	0		0	100	100	100		0	0	0	0
LU	LU00	Luxembourg	0	10	0	0	0	100	0	100	0	100	0	0	0	0		0	0	0	0	0	0	0	0	0	0	0	0		0	100	100	100		0	0	0	0
LV	LV00	Latvija	0	10	0	0	0	72.3485	0	100	0	100	0	0	0	0		0	0	0	0	0	0	0	0	0	0	0	0		0	100	100	100		0	0	0	0
MT	MT00	Malta	0	10	0	54.5455	54.5455	100	54.5455	100	54.5455	100	0	0	0	0		415.15	373.635	373.635	169.834	0	0	0	373.635	169.834	0	0	0		373.635	100	100	100		100	0	373.635	100
NL	NL11	Groningen	0	10	0	0	0	100	0	100	0	100	0	0	0	0		0	0	0	0	0	0	0	0	0	0	0	0		0	100	100	100		0	0	0	0
NL	NL12	Friesland (NL)	0	10	0	0	0	100	0	100	0	100	0	0	0	0		0	0	0	0	0	0	0	0	0	0	0	0		0	100	100	100		0	0	0	0
NL	NL13	Drenthe	0	10	0	0	0	100	0	100	0	100	0	0	0	0		0	0	0	0	0	0	0	0	0	0	0	0		0	100	100	100		0	0	0	0
NL	NL21	Overijssel	0	10	0	0	0	100	0	100	0	100	0	0	0	0		0	0	0	0	0	0	0	0	0	0	0	0		0	100	100	100		0	0	0	0
NL	NL22	Gelderland	0	10	0	0	0	44.7581	0	73.7903	0	100	0	0	0	0		0	0	0	0	0	0	0	0	0	0	0	0		0	100	100	100		0	0	0	0
NL	NL23	Flevoland	0	10	0	0	0	69.4184	0	100	0	100	0	0	0	0		0	0	0	0	0	0	0	0	0	0	0	0		0	100	100	100		0	0	0	0
NL	NL31	Utrecht	0	10	0	0	0	18.9189	0	100	0	100	0	0	0	0		0	0	0	0	0	0	0	0	0	0	0	0		0	100	100	100		0	0	0	0
NL	NL32	Noord-Holland	0	10	0	0	0	14.1176	0	100	0	100	0	0	0	0		0	0	0	0	0	0	0	0	0	0	0	0		0	100	100	100		0	0	0	0
NL	NL33	Zuid-Holland	0	10	0	0	0	6.25	0	100	0	100	0	0	0	0		0	0	0	0	0	0	0	0	0	0	0	0		0	100	100	100		0	0	0	0
NL	NL34	Zeeland	0.37594	10	0	0	0	46.9925	0	100	0	100	0	0	0	0		0	0	0	0	0	0	0	0	0	0	0	0		0	100	100	100		0	0	0	0
NL	NL41	Noord-Brabant	0	10	0	0	0	100	0	100	0	100	0	0	0	0		0	0	0	0	0	0	0	0	0	0	0	0		0	100	100	100		0	0	0	0
NL	NL42	Limburg (NL)	0	10	0	0	0	7.85714	0	100	0	100	0	0	0	0		0	0	0	0	0	0	0	0	0	0	0	0		0	100	100	100		0	0	0	0
PL	PL11	Lodzkie	0	10	0	0	0	5.74253	0	8.755	0	18.8515	0	0	0	0		0	0	0	0	0	0	0	0	0	0	0	0		0	100	100	100		0	0	0	0
PL	PL12	Mazowieckie	0	10	0	0	0	3.35825	0	7.10217	0	6.84704	0	0	0	0		0	0	0	0	0	0	0	0	0	0	0	0		0	100	100	100		0	0	0	0
PL	PL21	Malopolskie	0	10	0	0	0	17.8306	0	59.4354	0	100	0	0	0	0		0	0	0	0	0	0	0	0	0	0	0	0		0	100	100	100		0	0	0	0
PL	PL22	Slaskie	0	10	0	0	0	25.9843	0	100	0	100	0	0	0	0		0	0	0	0	0	0	0	0	0	0	0	0		0	100	100	100		0	0	0	0
PL	PL31	Lubelskie	0	10	0	0	0	9.04847	0	17.3788	0	21.6517	0	0	0	0		0	0	0	0	0	0	0	0	0	0	0	0		0	100	100	100		0	0	0	0
PL	PL32	Podkarpackie	0	10	0	0	0	48.7719	0	95.0877	0	91.5789	0	0	0	0		0	0	0	0	0	0	0	0	0	0	0	0		0	100	100	100		0	0	0	0
PL	PL33	Swietokrzyskie	0	10	0	0	0	2.99658	0	6.91353	0	10.4024	0	0	0	0		0	0	0	0	0	0	0	0	0	0	0	0		0	100	100	100		0	0	0	0
PL	PL34	Podlaskie	0	10	0	0	0	49.4505	0	100	0	100	0	0	0	0		0	0	0	0	0	0	0	0	0	0	0	0		0	100	100	100		0	0	0	0
PL	PL41	Wielkopolskie	0	10	0	0	0	5.4883	0	24.0517	0	56.0129	0	0	0	0		0	0	0	0	0	0	0	0	0	0	0	0		0	100	100	100		0	0	0	0
PL	PL42	Zachodniopomorskie	0.724638	10	0	0	0	9.05797	0	100	0	100	0	0	0	0		0	0	0	0	0	0	0	0	0	0	0	0		0	100	100	100		0	0	0	0
PL	PL43	Lubuskie	0	10	0	0	0	16.6065	0	100	0	100	0	0	0	0		0	0	0	0	0	0	0	0	0	0	0	0		0	100	100	100		0	0	0	0
PL	PL51	Dolnoslaskie	0	10	0	0	0	23.0228	0	75.3954	0	100	0	0	0	0		0	0	0	0	0	0	0	0	0	0	0	0		0	100	100	100		0	0	0	0
PL	PL52	Opolskie	0	10	0	0	0	45.9016	0	100	0	100	0	0	0	0		0	0	0	0	0	0	0	0	0	0	0	0		0	100	100	100		0	0	0	0
PL	PL61	Kujawsko-Pomorskie	0	10	0	0	0	43.254	0	100	0	100	0	0	0	0		0	0	0	0	0	0	0	0	0	0	0	0		0	100	100	100		0	0	0	0
PL	PL62	Warminsko-Mazurskie	0	10	0	0	0	0	0	100	0	100	0	0	0	0		0	0	0	0	0	0	0	0	0	0	0	0		0	100	100	100		0	0	0	0
PL	PL63	Pomorskie	0	10	0	0	0	26.9565	0	100	0	100	0	0	0	0		0	0	0	0	0	0	0	0	0	0	0	0		0	100	100	100		0	0	0	0
PT	PT11	Norte	0.85056	10	0	17.3913	17.3913	8.43347	17.3913	15.4407	17.3913	7.30937	5	3.26087	3.94737	5.76923		1214.4	1083.67	1083.67	895.203	819.706	756.977	829.769	995.913	816.873	747.982	690.742	757.164		1083.67	8.43347	15.4407	7.30937	BioE_COM-L	7.30937	829.769	253.897	23.4295
PT	PT15	Algarve	0.325504	10	0	7.97918	7.97918	9.20347	7.97918	23.7171	7.97918	21.5216	5	0.173461	0.188501	0.221976		20453.7	18348.4	18348.4	16884.3	15330.4	12879.9	13250.6	17400.7	16009.9	14536.4	12212.8	12564.3		18348.4	9.20347	23.7171	21.5216	BioE_COM-S	9.20347	15330.4	3018	16.4483
PT	PT16	Centro (P)	0.11461	10	0	35.2273	35.2273	30.1647	35.2273	56.2411	35.2273	34.862	5	1.13636	1.75439	3.33333		929.675	835.748	835.748	541.337	378.044	236.883	352.616	784.939	505.248	352.841	221.091	329.108		835.748	30.1647	56.2411	34.862	BioE_COM-S	30.1647	378.044	457.704	54.7658
PT	PT17	Centro (P)	0	10	0	34.9206	34.9206	22.1436	34.9206	41.9172	34.9206	56.7386	5	0	0	0		40.4846	36.4362	36.4362	23.7124	18.4616	13.7728	10.2583	34.6144	22.5268	17.5386	13.0842	9.74541		36.4362	22.1436	41.9172	56.7386	BioE_COM-S	22.1436	18.4616	17.9745	49.3316
PT	PT18	Centro (P)	0	10	0	13.6364	13.6364	22.2425	13.6364	40.866	13.6364	22.3361	5	1.23967	1.43541	1.75439		3956.39	3560.75	3560.75	3075.19	2391.19	1818.48	2388.31	3340.78	2879.5	2239.02	1702.76	2236.33		3560.75	22.2425	40.866	22.3361	BioE_COM-S	22.2425	2391.19	1169.56	32.8458
PT	PT20	RegiÒo Aut¾noma dos Aþores	2.66667	10	0	59.0909	59.0909	100	59.0909	100	59.0909	100	5	0	0	0		995.51	872.067	872.067	356.755	0	0	0	828.464	338.917	0	0	0		872.067	100	100	100		100	0	872.067	100
PT	PT30	RegiÒo Aut¾noma da Madeira	25.1309	10	0	80	80	59.6859	80	100	80	100	5	0	0	0		214.61	144.609	144.609	28.9218	11.6596	0	0	137.378	27.4757	11.0766	0	0		144.609	59.6859	100	100	BioE_COM-S	59.6859	11.6596	132.949	91.9372
RO	RO11	Nord-Vest	0	10	0	0	0	64.1074	0	85.414	0	90.073	0	0	0	0		0	0	0	0	0	0	0	0	0	0	0	0		0	100	100	100		0	0	0	0
RO	RO12	Centru	0.0448511	10	0	0	0	92.6444	0	100	0	100	0	0	0	0		0	0	0	0	0	0	0	0	0	0	0	0		0	100	100	100		0	0	0	0
RO	RO21	Nord-Est	0	10	0	0	0	78.7461	0	100	0	100	0	0	0	0		0	0	0	0	0	0	0	0	0	0	0	0		0	100	100	100		0	0	0	0
RO	RO22	Sud-Est	0.0149629	10	0	0	0	46.4927	0	75.8828	0	60.9917	0	0	0	0		0	0	0	0	0	0	0	0	0	0	0	0		0	100	100	100		0	0	0	0
RO	RO31	Sud - Muntenia	0	10	0	0	0	43.8393	0	54.2651	0	43.3466	0	0	0	0		0	0	0	0	0	0	0	0	0	0	0	0		0	100	100	100		0	0	0	0
RO	RO32	Bucuresti - Ilfov	0	10	0	0	0	100	0	100	0	100	0	0	0	0		0	0	0	0	0	0	0	0	0	0	0	0		0	100	100	100		0	0	0	0
RO	RO41	Sud-Vest Oltenia	0.0152151	10	0	0	0	71.3499	0	83.3029	0	79.8339	0	0	0	0		0	0	0	0	0	0	0	0	0	0	0	0		0	100	100	100		0	0	0	0
RO	RO42	Vest	0.17963	10	0	0	0	64.9123	0	89.306	0	93.6171	0	0	0	0		0	0	0	0	0	0	0	0	0	0	0	0		0	100	100	100		0	0	0	0
SE	SE11	Stockholm	0	10	0	0	0	100	0	100	0	100	0	0	0	0		0	0	0	0	0	0	0	0	0	0	0	0		0	100	100	100		0	0	0	0
SE	SE12	Ostra Mellansverige	0	10	0	0	0	100	0	100	0	100	0	0	0	0		0	0	0	0	0	0	0	0	0	0	0	0		0	100	100	100		0	0	0	0
SE	SE21	SmÕland med oarna	0	10	0	0	0	100	0	100	0	100	0	0	0	0		0	0	0	0	0	0	0	0	0	0	0	0		0	100	100	100		0	0	0	0
SE	SE22	Sydsverige	0.283286	10	0	0	0	46.4589	0	100	0	100	0	0	0	0		0	0	0	0	0	0	0	0	0	0	0	0		0	100	100	100		0	0	0	0
SE	SE23	Võstsverige	0	10	0	0	0	100	0	100	0	100	0	0	0	0		0	0	0	0	0	0	0	0	0	0	0	0		0	100	100	100		0	0	0	0
SE	SE31	Norra Mellansverige	0	10	0	0	0	100	0	100	0	100	0	0	0	0		0	0	0	0	0	0	0	0	0	0	0	0		0	100	100	100		0	0	0	0
SE	SE32	Mellersta Norrland	0	10	0	0	0	100	0	100	0	100	0	0	0	0		0	0	0	0	0	0	0	0	0	0	0	0		0	100	100	100		0	0	0	0
SE	SE33	Ovre Norrland	0	10	0	0	0	100	0	100	0	100	0	0	0	0		0	0	0	0	0	0	0	0	0	0	0	0		0	100	100	100		0	0	0	0
SI	SI03	Vzhodna Slovenija	0.652316	10	0	0	0	55.3164	0	90.0848	0	100	0	0	0	0		0	0	0	0	0	0	0	0	0	0	0	0		0	100	100	100		0	0	0	0
SI	SI04	Zahodna Slovenija	0.694444	10	0	0	0	36.0243	0	57.2917	0	48.2639	0	0	0	0		0	0	0	0	0	0	0	0	0	0	0	0		0	100	100	100		0	0	0	0
SK	SK01	Bratislavsky	0	10	0	0	0	62.6523	0	100	0	100	0	0	0	0		0	0	0	0	0	0	0	0	0	0	0	0		0	100	100	100		0	0	0	0
SK	SK02	Zapadne Slovensko	0	10	0	0	0	94.5463	0	100	0	100	0	0	0	0		0	0	0	0	0	0	0	0	0	0	0	0		0	100	100	100		0	0	0	0
SK	SK03	Stredne Slovensko	0	10	0	0	0	100	0	100	0	100	0	0	0	0		0	0	0	0	0	0	0	0	0	0	0	0		0	100	100	100		0	0	0	0
SK	SK04	Vychodne Slovensko	0.157853	10	0	0	0	99.7632	0	100	0	100	0	0	0	0		0	0	0	0	0	0	0	0	0	0	0	0		0	100	100	100		0	0	0	0
UK	UKC1	Tees Valley and Durham	0.157853	10	0	0	0	99.7632	0	100	0	100	0	0	0	0		0	0	0	0	0	0	0	0	0	0	0	0		0	100	100	100		0	0	0	0
UK	UKC2	Northumberland and Tyne and Wear	0.157853	10	0	0	0	99.7632	0	100	0	100	0	0	0	0		0	0	0	0	0	0	0	0	0	0	0	0		0	100	100	100		0	0	0	0
UK	UKD1	Cumbria	0.157853	10	0	0	0	99.7632	0	100	0	100	0	0	0	0		0	0	0	0	0	0	0	0	0	0	0	0		0	100	100	100		0	0	0	0
UK	UKD3	Greater Manchester	0.157853	10	0	0	0	99.7632	0	100	0	100	0	0	0	0		0	0	0	0	0	0	0	0	0	0	0	0		0	100	100	100		0	0	0	0
UK	UKD4	Lancashire	0.157853	10	0	0	0	99.7632	0	100	0	100	0	0	0	0		0	0	0	0	0	0	0	0	0	0	0	0		0	100	100	100		0	0	0	0
UK	UKD6	Cheshire	0.157853	10	0	0	0	99.7632	0	100	0	100	0	0	0	0		0	0	0	0	0	0	0	0	0	0	0	0		0	100	100	100		0	0	0	0
UK	UKD7	Merseyside	0.157853	10	0	0	0	99.7632	0	100	0	100	0	0	0	0		0	0	0	0	0	0	0	0	0	0	0	0		0	100	100	100		0	0	0	0
UK	UKE1	East Yorkshire and Northern Lincolnshire	0.157853	10	0	0	0	99.7632	0	100	0	100	0	0	0	0		0	0	0	0	0	0	0	0	0	0	0	0		0	100	100	100		0	0	0	0
UK	UKE2	North Yorkshire	0.157853	10	0	0	0	99.7632	0	100	0	100	0	0	0	0		0	0	0	0	0	0	0	0	0	0	0	0		0	100	100	100		0	0	0	0
UK	UKE3	South Yorkshire	0.157853	10	0	0	0	99.7632	0	100	0	100	0	0	0	0		0	0	0	0	0	0	0	0	0	0	0	0		0	100	100	100		0	0	0	0
UK	UKE4	West Yorkshire	0.157853	10	0	0	0	99.7632	0	100	0	100	0	0	0	0		0	0	0	0	0	0	0	0	0	0	0	0		0	100	100	100		0	0	0	0
UK	UKF1	Derbyshire and Nottinghamshire	0	10	0	0	0	100	0	100	0	100	0	0	0	0		0	0	0	0	0	0	0	0	0	0	0	0		0	100	100	100		0	0	0	0
UK	UKF2	Leicestershire, Rutland and Northamptonshire	0	10	0	0	0	100	0	100	0	100	0	0	0	0		0	0	0	0	0	0	0	0	0	0	0	0		0	100	100	100		0	0	0	0
UK	UKF3	Lincolnshire	0	10	0	0	0	100	0	100	0	100	0	0	0	0		0	0	0	0	0	0	0	0	0	0	0	0		0	100	100	100		0	0	0	0
UK	UKG1	Herefordshire, Worcestershire and Warwickshire	0	10	0	0	0	100	0	100	0	100	0	0	0	0		0	0	0	0	0	0	0	0	0	0	0	0		0	100	100	100		0	0	0	0
UK	UKG2	Shropshire and Staffordshire	0	10	0	0	0	100	0	100	0	100	0	0	0	0		0	0	0	0	0	0	0	0	0	0	0	0		0	100	100	100		0	0	0	0
UK	UKG3	West Midlands	0	10	0	0	0	100	0	100	0	100	0	0	0	0		0	0	0	0	0	0	0	0	0	0	0	0		0	100	100	100		0	0	0	0
UK	UKH1	East Anglia	0	10	0	0	0	100	0	100	0	100	0	0	0	0		0	0	0	0	0	0	0	0	0	0	0	0		0	100	100	100		0	0	0	0
UK	UKH2	Bedfordshire and Hertfordshire	0	10	0	0	0	100	0	100	0	100	0	0	0	0		0	0	0	0	0	0	0	0	0	0	0	0		0	100	100	100		0	0	0	0
UK	UKH3	Essex	0	10	0	0	0	100	0	100	0	100	0	0	0	0		0	0	0	0	0	0	0	0	0	0	0	0		0	100	100	100		0	0	0	0
UK	UKI3	Inner London	0	10	0	0	0	100	0	100	0	100	0	0	0	0		0	0	0	0	0	0	0	0	0	0	0	0		0	100	100	100		0	0	0	0
UK	UKI4	Inner London	0	10	0	0	0	100	0	100	0	100	0	0	0	0		0	0	0	0	0	0	0	0	0	0	0	0		0	100	100	100		0	0	0	0
UK	UKI5	Outer London	0	10	0	0	0	100	0	100	0	100	0	0	0	0		0	0	0	0	0	0	0	0	0	0	0	0		0	100	100	100		0	0	0	0
UK	UKI6	Outer London	0	10	0	0	0	100	0	100	0	100	0	0	0	0		0	0	0	0	0	0	0	0	0	0	0	0		0	100	100	100		0	0	0	0
UK	UKI7	Outer London	0	10	0	0	0	100	0	100	0	100	0	0	0	0		0	0	0	0	0	0	0	0	0	0	0	0		0	100	100	100		0	0	0	0
UK	UKJ1	Berkshire, Buckinghamshire and Oxfordshire	0	10	0	0	0	100	0	100	0	100	0	0	0	0		0	0	0	0	0	0	0	0	0	0	0	0		0	100	100	100		0	0	0	0
UK	UKJ2	Berkshire, Buckinghamshire and Oxfordshire	0	10	0	0	0	41.8605	0	100	0	100	0	0	0	0		0	0	0	0	0	0	0	0	0	0	0	0		0	100	100	100		0	0	0	0
UK	UKJ3	Hampshire and Isle of Wight	0	10	0	0	0	100	0	100	0	100	0	0	0	0		0	0	0	0	0	0	0	0	0	0	0	0		0	100	100	100		0	0	0	0
UK	UKJ4	Hampshire and Isle of Wight	0	10	0	0	0	0	0	0	0	0	0	0	0	0		0	0	0	0	0	0	0	0	0	0	0	0		0	100	100	100		0	0	0	0
UK	UKK1	Gloucestershire, Wiltshire and Bristol/Bath area	0	10	0	0	0	0	0	0	0	0	0	0	0	0		0	0	0	0	0	0	0	0	0	0	0	0		0	100	100	100		0	0	0	0
UK	UKK2	Dorset and Somerset	0	10	0	0	0	0	0	100	0	100	0	0	0	0		0	0	0	0	0	0	0	0	0	0	0	0		0	100	100	100		0	0	0	0
UK	UKK3	Cornwall and Isles of Scilly	0	10	0	0	0	0	0	100	0	100	0	0	0	0		0	0	0	0	0	0	0	0	0	0	0	0		0	100	100	100		0	0	0	0
UK	UKK4	Devon	0	10	0	0	0	0	0	100	0	100	0	0	0	0		0	0	0	0	0	0	0	0	0	0	0	0		0	100	100	100		0	0	0	0
UK	UKL1	West Wales and The Valleys	10.4895	10	0	0	0	100	0	100	0	100	0	0	0	0		0	0	0	0	0	0	0	0	0	0	0	0		0	100	100	100		0	0	0	0
UK	UKL2	East Wales	10.4895	10	0	0	0	100	0	100	0	100	0	0	0	0		0	0	0	0	0	0	0	0	0	0	0	0		0	100	100	100		0	0	0	0
UK	UKM2	Eastern Scotland	10.4895	10	0	0	0	100	0	100	0	100	0	0	0	0		0	0	0	0	0	0	0	0	0	0	0	0		0	100	100	100		0	0	0	0
UK	UKM3	South Western Scotland	10.4895	10	0	0	0	100	0	100	0	100	0	0	0	0		0	0	0	0	0	0	0	0	0	0	0	0		0	100	100	100		0	0	0	0
UK	UKM5	North Eastern Scotland	10.4895	10	0	0	0	100	0	100	0	100	0	0	0	0		0	0	0	0	0	0	0	0	0	0	0	0		0	100	100	100		0	0	0	0
UK	UKM6	Highlands and Islands	10.4895	10	0	0	0	100	0	100	0	100	0	0	0	0		0	0	0	0	0	0	0	0	0	0	0	0		0	100	100	100		0	0	0	0
UK	UKN0	Northern Ireland	10.4895	10	0	0	0	100	0	100	0	100	0	0	0	0		0	0	0	0	0	0	0	0	0	0	0	0		0	100	100	100		0	0	0	0

## Sheet: Olive
OLIVE			CRT_SLOPE	CRT_LOSS	CRE_WASTE	CRE_SELF	CRE_>2ha	CRE_COM-S	CRE_>2ha	CRE_COM-M	CRE_>2ha	CRE_COM-L	CRI_COMP	CRI_>0ha	CRI_>2ha	CRI_>5ha		BioTH	BioT	BioE_WASTE	BioE_SELF	BioE_COM-S	BioE_COM-M	BioE_COM-L	BioI_WASTE	BioI_SELF	BioI_COM-S	BioI_COM-M	BioI_COM-L		BioT	CRE_COM			Best economic case	CR BEST Economic	BioE_COM_BEST	GAP = BioT - BioE_COM_BEST
Country	NUTs2	NAME	(%)	(%)	(%)	(%)	(%)	(%)	(%)	(%)	(%)	(%)	(%)	(%)	(%)	(%)		t DM·yr-1	t DM·yr-1	t DM·yr-1	t DM·yr-1	t DM·yr-1	t DM·yr-1	t DM·yr-1	t DM·yr-1	t DM·yr-1	t DM·yr-1	t DM·yr-1	t DM·yr-1		(DM t)	S	M	L		(%)	(DM t)	(DM t)	(%)
AT	AT11	Burgenland (A)	0	4	0	0	0	30.5769	0	72.6573	0	78.8112	0	0	0	0		0	0	0	0	0	0	0	0	0	0	0	0		0	100	100	100		0	0	0	0
AT	AT12	Nieder÷sterreich	0.0217628	4	0	0	0	32.4592	0	73.7106	0	74.3308	0	0	0	0		0	0	0	0	0	0	0	0	0	0	0	0		0	100	100	100		0	0	0	0
AT	AT13	Wien	0	4	0	0	0	100	0	100	0	100	0	0	0	0		0	0	0	0	0	0	0	0	0	0	0	0		0	100	100	100		0	0	0	0
AT	AT21	Kõrnten	0	4	0	0	0	100	0	100	0	100	0	0	0	0		0	0	0	0	0	0	0	0	0	0	0	0		0	100	100	100		0	0	0	0
AT	AT22	Steiermark	0	4	0	0	0	40.3194	0	99.8004	0	100	0	0	0	0		0	0	0	0	0	0	0	0	0	0	0	0		0	100	100	100		0	0	0	0
AT	AT31	Ober÷sterreich	0	4	0	0	0	40.3194	0	99.8004	0	100	0	0	0	0		0	0	0	0	0	0	0	0	0	0	0	0		0	100	100	100		0	0	0	0
AT	AT32	Salzburg	0	4	0	0	0	40.3194	0	99.8004	0	100	0	0	0	0		0	0	0	0	0	0	0	0	0	0	0	0		0	100	100	100		0	0	0	0
AT	AT33	Tirol	0	4	0	0	0	40.3194	0	99.8004	0	100	0	0	0	0		0	0	0	0	0	0	0	0	0	0	0	0		0	100	100	100		0	0	0	0
AT	AT34	Vorarlberg	0	4	0	0	0	40.3194	0	99.8004	0	100	0	0	0	0		0	0	0	0	0	0	0	0	0	0	0	0		0	100	100	100		0	0	0	0
BE	BE10	Region de Bruxelles-Capitalet	0	4	0	0	0	40.3194	0	99.8004	0	100	0	0	0	0		0	0	0	0	0	0	0	0	0	0	0	0		0	100	100	100		0	0	0	0
BE	BE21	Prov. Antwerpen	0	4	0	0	0	100	0	100	0	100	0	0	0	0		0	0	0	0	0	0	0	0	0	0	0	0		0	100	100	100		0	0	0	0
BE	BE22	Prov. Limburg (B)	0	4	0	0	0	2.92612	0	1.68252	0	0.877835	0	0	0	0		0	0	0	0	0	0	0	0	0	0	0	0		0	100	100	100		0	0	0	0
BE	BE23	Prov. Oost-Vlaanderen	0	4	0	0	0	100	0	100	0	100	0	0	0	0		0	0	0	0	0	0	0	0	0	0	0	0		0	100	100	100		0	0	0	0
BE	BE24	Prov. Vlaams-Brabant	0	4	0	0	0	12.2449	0	12.5	0	17.602	0	0	0	0		0	0	0	0	0	0	0	0	0	0	0	0		0	100	100	100		0	0	0	0
BE	BE25	Prov. West-Vlaanderen	0	4	0	0	0	100	0	100	0	100	0	0	0	0		0	0	0	0	0	0	0	0	0	0	0	0		0	100	100	100		0	0	0	0
BE	BE31	Prov. Brabant Wallon	0	4	0	0	0	100	0	100	0	100	0	0	0	0		0	0	0	0	0	0	0	0	0	0	0	0		0	100	100	100		0	0	0	0
BE	BE32	Prov. Hainaut	0	4	0	0	0	100	0	100	0	100	0	0	0	0		0	0	0	0	0	0	0	0	0	0	0	0		0	100	100	100		0	0	0	0
BE	BE33	Prov. LiÞge	0	4	0	0	0	58.5366	0	58.5366	0	42.6829	0	0	0	0		0	0	0	0	0	0	0	0	0	0	0	0		0	100	100	100		0	0	0	0
BE	BE34	Prov. Luxembourg (B)	0	4	0	0	0	58.5366	0	58.5366	0	42.6829	0	0	0	0		0	0	0	0	0	0	0	0	0	0	0	0		0	100	100	100		0	0	0	0
BE	BE35	Prov. Namur	0	4	0	0	0	100	0	100	0	100	0	0	0	0		0	0	0	0	0	0	0	0	0	0	0	0		0	100	100	100		0	0	0	0
BG	BG31	Severozapaden	0.0997133	4	0	0	0	100	0	100	0	100	0	0	0	0		0	0	0	0	0	0	0	0	0	0	0	0		0	100	100	100		0	0	0	0
BG	BG32	Severen tsentralen	0	4	0	0	0	97.6111	0	100	0	100	0	0	0	0		0	0	0	0	0	0	0	0	0	0	0	0		0	100	100	100		0	0	0	0
BG	BG33	Severoiztochen	0	4	0	0	0	99.9785	0	100	0	100	0	0	0	0		0	0	0	0	0	0	0	0	0	0	0	0		0	100	100	100		0	0	0	0
BG	BG34	Yugoiztochen	0.185447	4	0	0	0	75.0088	0	97.651	0	99.7704	0	0	0	0		0	0	0	0	0	0	0	0	0	0	0	0		0	100	100	100		0	0	0	0
BG	BG41	Yugozapaden	0.178663	4	0	0	0	77.5651	0	100	0	100	0	0	0	0		0	0	0	0	0	0	0	0	0	0	0	0		0	100	100	100		0	0	0	0
BG	BG42	Yuzhen tsentralen	0.12842	4	0	0	0	68.3493	0	89.5979	0	100	0	0	0	0		0	0	0	0	0	0	0	0	0	0	0	0		0	100	100	100		0	0	0	0
CY	CY00	Kypros/Kibris	0.827433	4	0	55.4983	55.4983	35.4841	55.4983	64.7864	55.4983	57.3156	30	4.63918	8.68726	13.0612		16373.3	15588.3	15588.3	6937.08	4475.51	2442.8	2961.05	10405.6	4434.1	2860.7	1561.41	1892.67		15588.3	35.4841	64.7864	57.3156	BioE_COM-S	35.4841	4475.51	11112.8	71.2893
CZ	CZ01	Praha	0	4	0	0	0	100	0	100	0	100	0	0	0	0		0	0	0	0	0	0	0	0	0	0	0	0		0	100	100	100		0	0	0	0
CZ	CZ02	Stredni Cechy	0	4	0	0	0	71.5206	0	100	0	100	0	0	0	0		0	0	0	0	0	0	0	0	0	0	0	0		0	100	100	100		0	0	0	0
CZ	CZ03	Jihozapad	0	4	0	0	0	45.0207	0	100	0	100	0	0	0	0		0	0	0	0	0	0	0	0	0	0	0	0		0	100	100	100		0	0	0	0
CZ	CZ04	Severozapad	0	4	0	0	0	100	0	100	0	100	0	0	0	0		0	0	0	0	0	0	0	0	0	0	0	0		0	100	100	100		0	0	0	0
CZ	CZ05	Severovychod	0	4	0	0	0	61.7722	0	100	0	100	0	0	0	0		0	0	0	0	0	0	0	0	0	0	0	0		0	100	100	100		0	0	0	0
CZ	CZ06	Jihovychod	0	4	0	0	0	92.2699	0	100	0	100	0	0	0	0		0	0	0	0	0	0	0	0	0	0	0	0		0	100	100	100		0	0	0	0
CZ	CZ07	Stredni Morava	0	4	0	0	0	100	0	100	0	100	0	0	0	0		0	0	0	0	0	0	0	0	0	0	0	0		0	100	100	100		0	0	0	0
CZ	CZ08	Moravskoslezsko	0	4	0	0	0	100	0	100	0	100	0	0	0	0		0	0	0	0	0	0	0	0	0	0	0	0		0	100	100	100		0	0	0	0
DE	DE11	Stuttgart	0	4	0	0	0	70.0523	0	100	0	100	0	0	0	0		0	0	0	0	0	0	0	0	0	0	0	0		0	100	100	100		0	0	0	0
DE	DE12	Karlsruhe	0	4	0	0	0	90.8028	0	97.6928	0	93.11	0	0	0	0		0	0	0	0	0	0	0	0	0	0	0	0		0	100	100	100		0	0	0	0
DE	DE13	Freiburg	0	4	0	0	0	14.2318	0	43.3704	0	46.7447	0	0	0	0		0	0	0	0	0	0	0	0	0	0	0	0		0	100	100	100		0	0	0	0
DE	DE14	Tübingen	0	4	0	0	0	33.8741	0	84.0363	0	95.7495	0	0	0	0		0	0	0	0	0	0	0	0	0	0	0	0		0	100	100	100		0	0	0	0
DE	DE21	Oberbayern	0	4	0	0	0	100	0	100	0	100	0	0	0	0		0	0	0	0	0	0	0	0	0	0	0	0		0	100	100	100		0	0	0	0
DE	DE22	Niederbayern	0	4	0	0	0	100	0	100	0	100	0	0	0	0		0	0	0	0	0	0	0	0	0	0	0	0		0	100	100	100		0	0	0	0
DE	DE23	Oberpfalz	0	4	0	0	0	100	0	100	0	100	0	0	0	0		0	0	0	0	0	0	0	0	0	0	0	0		0	100	100	100		0	0	0	0
DE	DE24	Oberfranken	0	4	0	0	0	14.876	0	100	0	100	0	0	0	0		0	0	0	0	0	0	0	0	0	0	0	0		0	100	100	100		0	0	0	0
DE	DE25	Mittelfranken	0	4	0	0	0	100	0	100	0	100	0	0	0	0		0	0	0	0	0	0	0	0	0	0	0	0		0	100	100	100		0	0	0	0
DE	DE26	Unterfranken	0	4	0	0	0	62.2305	0	100	0	100	0	0	0	0		0	0	0	0	0	0	0	0	0	0	0	0		0	100	100	100		0	0	0	0
DE	DE27	Schwaben	0	4	0	0	0	0	0	36.5297	0	100	0	0	0	0		0	0	0	0	0	0	0	0	0	0	0	0		0	100	100	100		0	0	0	0
DE	DE30	Berlin	0	4	0	0	0	0	0	36.5297	0	100	0	0	0	0		0	0	0	0	0	0	0	0	0	0	0	0		0	100	100	100		0	0	0	0
DE	DE40	Brandenburg	0	4	0	0	0	32.6327	0	85.3982	0	100	0	0	0	0		0	0	0	0	0	0	0	0	0	0	0	0		0	100	100	100		0	0	0	0
DE	DE50	Bremen	0	4	0	0	0	32.6327	0	85.3982	0	100	0	0	0	0		0	0	0	0	0	0	0	0	0	0	0	0		0	100	100	100		0	0	0	0
DE	DE60	Hamburg	0	4	0	0	0	0	0	17.0029	0	3.45821	0	0	0	0		0	0	0	0	0	0	0	0	0	0	0	0		0	100	100	100		0	0	0	0
DE	DE71	Darmstadt	0	4	0	0	0	60.9778	0	59.8222	0	57.3333	0	0	0	0		0	0	0	0	0	0	0	0	0	0	0	0		0	100	100	100		0	0	0	0
DE	DE72	Gießen	0	4	0	0	0	100	0	100	0	100	0	0	0	0		0	0	0	0	0	0	0	0	0	0	0	0		0	100	100	100		0	0	0	0
DE	DE73	Kassel	0	4	0	0	0	100	0	100	0	100	0	0	0	0		0	0	0	0	0	0	0	0	0	0	0	0		0	100	100	100		0	0	0	0
DE	DE80	Mecklenburg-Vorpommern	0	4	0	0	0	78.1193	0	100	0	100	0	0	0	0		0	0	0	0	0	0	0	0	0	0	0	0		0	100	100	100		0	0	0	0
DE	DE91	Braunschweig	0	4	0	0	0	78.1193	0	100	0	100	0	0	0	0		0	0	0	0	0	0	0	0	0	0	0	0		0	100	100	100		0	0	0	0
DE	DE92	Hannover	0	4	0	0	0	78.1193	0	100	0	100	0	0	0	0		0	0	0	0	0	0	0	0	0	0	0	0		0	100	100	100		0	0	0	0
DE	DE93	Lüneburg	0	4	0	0	0	8.22245	0	10.8837	0	9.38246	0	0	0	0		0	0	0	0	0	0	0	0	0	0	0	0		0	100	100	100		0	0	0	0
DE	DE94	Weser-Ems	0	4	0	0	0	8.22245	0	10.8837	0	9.38246	0	0	0	0		0	0	0	0	0	0	0	0	0	0	0	0		0	100	100	100		0	0	0	0
DE	DEA1	Düsseldorf	0	4	0	0	0	100	0	100	0	100	0	0	0	0		0	0	0	0	0	0	0	0	0	0	0	0		0	100	100	100		0	0	0	0
DE	DEA2	Köln	0	4	0	0	0	11.2224	0	14.4289	0	100	0	0	0	0		0	0	0	0	0	0	0	0	0	0	0	0		0	100	100	100		0	0	0	0
DE	DEA3	Münster	0	4	0	0	0	11.2224	0	14.4289	0	100	0	0	0	0		0	0	0	0	0	0	0	0	0	0	0	0		0	100	100	100		0	0	0	0
DE	DEA4	Detmold	0	4	0	0	0	11.2224	0	14.4289	0	100	0	0	0	0		0	0	0	0	0	0	0	0	0	0	0	0		0	100	100	100		0	0	0	0
DE	DEA5	Arnsberg	0	4	0	0	0	11.2224	0	14.4289	0	100	0	0	0	0		0	0	0	0	0	0	0	0	0	0	0	0		0	100	100	100		0	0	0	0
DE	DEB1	Koblenz	0	4	0	0	0	92.1376	0	94.226	0	98.8943	0	0	0	0		0	0	0	0	0	0	0	0	0	0	0	0		0	100	100	100		0	0	0	0
DE	DEB2	Trier	0	4	0	0	0	100	0	100	0	100	0	0	0	0		0	0	0	0	0	0	0	0	0	0	0	0		0	100	100	100		0	0	0	0
DE	DEB3	Rheinhessen-Pfalz	0	4	0	0	0	3.80239	0	5.62862	0	2.35775	0	0	0	0		0	0	0	0	0	0	0	0	0	0	0	0		0	100	100	100		0	0	0	0
DE	DEC0	Saarland	0	4	0	0	0	100	0	100	0	100	0	0	0	0		0	0	0	0	0	0	0	0	0	0	0	0		0	100	100	100		0	0	0	0
DE	DED2	Dresden	0	4	0	0	0	23.6559	0	23.8351	0	100	0	0	0	0		0	0	0	0	0	0	0	0	0	0	0	0		0	100	100	100		0	0	0	0
DE	DED4	Chemnitz	0	4	0	0	0	72.5664	0	100	0	100	0	0	0	0		0	0	0	0	0	0	0	0	0	0	0	0		0	100	100	100		0	0	0	0
DE	DED5	Leipzig	0	4	0	0	0	36.4662	0	100	0	100	0	0	0	0		0	0	0	0	0	0	0	0	0	0	0	0		0	100	100	100		0	0	0	0
DE	DEE0	Sachsen-Anhalt	0	4	0	0	0	84.9143	0	100	0	100	0	0	0	0		0	0	0	0	0	0	0	0	0	0	0	0		0	100	100	100		0	0	0	0
DE	DEF0	Schleswig-Holstein	0	4	0	0	0	24.6154	0	24.6154	0	24.6154	0	0	0	0		0	0	0	0	0	0	0	0	0	0	0	0		0	100	100	100		0	0	0	0
DE	DEG0	Thüringen	0	4	0	0	0	45.6897	0	100	0	100	0	0	0	0		0	0	0	0	0	0	0	0	0	0	0	0		0	100	100	100		0	0	0	0
DK	DK01	Hovedstaden	0	4	0	0	0	100	0	100	0	100	0	0	0	0		0	0	0	0	0	0	0	0	0	0	0	0		0	100	100	100		0	0	0	0
DK	DK02	Sjaelland	0	4	0	0	0	42	0	100	0	100	0	0	0	0		0	0	0	0	0	0	0	0	0	0	0	0		0	100	100	100		0	0	0	0
DK	DK03	Syddanmark	0	4	0	0	0	100	0	100	0	100	0	0	0	0		0	0	0	0	0	0	0	0	0	0	0	0		0	100	100	100		0	0	0	0
DK	DK04	Midtjylland	0	4	0	0	0	100	0	100	0	100	0	0	0	0		0	0	0	0	0	0	0	0	0	0	0	0		0	100	100	100		0	0	0	0
DK	DK05	Nordjylland	0	4	0	0	0	100	0	100	0	100	0	0	0	0		0	0	0	0	0	0	0	0	0	0	0	0		0	100	100	100		0	0	0	0
EE	EE00	Eesti	0	4	0	0	0	100	0	100	0	100	0	0	0	0		0	0	0	0	0	0	0	0	0	0	0	0		0	100	100	100		0	0	0	0
EL	EL30	Attiki	0	4	0	38.6021	38.6021	100	38.6021	100	38.6021	100	30	6.03015	9.4494	15.456		28124.9	26999.9	26999.9	16577.3	0	0	0	17760.2	10507.6	0	0	0		26999.9	100	100	100		100	0	26999.9	100
EL	EL41	Voreio Aigaio	0	4	0	21.5519	21.5519	100	21.5519	100	21.5519	100	30	19.6438	24.5773	33.9813		71719.4	68850.6	68850.6	54012	0	0	0	38728	28516.1	0	0	0		68850.6	100	100	100		100	0	68850.6	100
EL	EL42	Notio Aigaio	0	4	0	43.8476	43.8476	100	43.8476	100	43.8476	100	30	0.437227	0.778643	1.81818		21465.8	20607.2	20607.2	11571.4	0	0	0	14362	8036.93	0	0	0		20607.2	100	100	100		100	0	20607.2	100
EL	EL43	Kriti	0	4	0	26.6056	26.6056	100	26.6056	100	26.6056	100	30	3.18393	4.13331	6.20897		204194	196027	196027	143872	0	0	0	132850	96548.1	0	0	0		196027	100	100	100		100	0	196027	100
EL	EL51	Anatoliki Makedonia, Thraki	0	4	0	28.268	28.268	100	28.268	100	28.268	100	30	2.94118	3.64465	4.08163		14613	14028.5	14028.5	10062.9	0	0	0	9531.15	6787.33	0	0	0		14028.5	100	100	100		100	0	14028.5	100
EL	EL52	Kentriki Makedonia	0	4	0	22.5566	22.5566	0	22.5566	0	22.5566	0	30	8.15534	10.4053	13.9806		37447.8	35949.9	35949.9	27840.8	27840.8	27840.8	27840.8	23112.7	17460.7	17460.7	17460.7	17460.7		35949.9	0	0	0	BioE_COM-S & BioE_COM-M & BioE_COM-L	0	27840.8	8109.09	22.5566
EL	EL53	Dytiki Makedonia	0	4	0	15.7895	15.7895	0	15.7895	0	15.7895	0	30	0	0	0		206.325	198.072	198.072	166.797	166.797	166.797	166.797	138.65	116.758	116.758	116.758	116.758		198.072	0	0	0	BioE_COM-S & BioE_COM-M & BioE_COM-L	0	166.797	31.2745	15.7895
EL	EL54	Ipeiros	0	4	0	34.3719	34.3719	0	34.3719	0	34.3719	0	30	1.50754	2.14395	3.6965		24599.3	23615.4	23615.4	15498.3	15498.3	15498.3	15498.3	16281.5	10616.2	10616.2	10616.2	10616.2		23615.4	0	0	0	BioE_COM-S & BioE_COM-M & BioE_COM-L	0	15498.3	8117.04	34.3719
EL	EL61	Thessalia	0	4	0	23.9854	23.9854	0	23.9854	0	23.9854	0	30	14.8446	18.8071	26.556		34558.8	33176.4	33176.4	25219	25219	25219	25219	19776.1	14333.2	14333.2	14333.2	14333.2		33176.4	0	0	0	BioE_COM-S & BioE_COM-M & BioE_COM-L	0	25219	7957.49	23.9854
EL	EL62	Ionia Nisia	0	4	0	42.6667	42.6667	0	42.6667	0	42.6667	0	30	1.27407	2.11886	5.06329		46677.7	44810.6	44810.6	25691.4	25691.4	25691.4	25691.4	30967.8	17602.9	17602.9	17602.9	17602.9		44810.6	0	0	0	BioE_COM-S & BioE_COM-M & BioE_COM-L	0	25691.4	19119.2	42.6667
EL	EL63	Dytiki Ellada	0	4	0	31.4397	31.4397	0	31.4397	0	31.4397	0	30	8.29229	10.8086	12.6254		116432	111775	111775	76633.2	76633.2	76633.2	76633.2	71754.4	47845.2	47845.2	47845.2	47845.2		111775	0	0	0	BioE_COM-S & BioE_COM-M & BioE_COM-L	0	76633.2	35141.7	31.4397
EL	EL64	Sterea Ellada	0	4	0	28.2869	28.2869	0	28.2869	0	28.2869	0	30	3.79814	5.07407	7.31383		97300.7	93408.7	93408.7	66986.3	66986.3	66986.3	66986.3	62902.6	44511.2	44511.2	44511.2	44511.2		93408.7	0	0	0	BioE_COM-S & BioE_COM-M & BioE_COM-L	0	66986.3	26422.4	28.2869
EL	EL65	Peloponnisos	0	4	0	17.3826	17.3826	0	17.3826	0	17.3826	0	30	7.1834	8.48599	11.889		235494	226075	226075	186777	186777	186777	186777	146884	119649	119649	119649	119649		226075	0	0	0	BioE_COM-S & BioE_COM-M & BioE_COM-L	0	186777	39297.6	17.3826
ES	ES11	Galicia	1.20846	4	0	0	0	29.3051	0	51.5861	0	99.7734	5	0	0	0		12.1222	11.4967	11.4967	11.4967	8.12758	5.566	0.0260499	10.9219	10.9219	7.7212	5.2877	0.0247474		11.4967	100	100	100	BioE_COM-S	29.3051	8.12758	3.36913	29.3051
ES	ES12	Principado de Asturias	0	4	0	0	0	56.25	0	100	0	100	5	0	0	0		0	0	0	0	0	0	0	0	0	0	0	0		0	100	100	100		0	0	0	0
ES	ES13	Cantabria	0	4	0	0	0	56.25	0	100	0	100	5	0	0	0		0	0	0	0	0	0	0	0	0	0	0	0		0	100	100	100		0	0	0	0
ES	ES21	País Vasco	0	4	0	13.3333	13.3333	0.247001	13.3333	0	13.3333	0	5	0	0	0		177.766	170.656	170.656	147.902	147.536	147.902	147.902	162.123	140.506	140.159	140.506	140.506		170.656	0.247001	0	0	BioE_COM-M & BioE_COM-L	0	147.902	22.7541	13.3333
ES	ES22	Comunidad Foral de Navarra	0.0254453	4	0	8.11287	8.11287	20.9924	8.11287	45.1908	8.11287	37.659	5	4.93827	5.37428	6.11354		6650.39	6382.75	6382.75	5864.92	4633.74	3214.51	3656.25	5764.17	5272.24	4165.47	2889.67	3286.76		6382.75	20.9924	45.1908	37.659	BioE_COM-S	20.9924	4633.74	1749.01	27.4022
ES	ES23	La Rioja	0.00898715	4	0	8.17942	8.17942	4.09814	8.17942	10.1735	8.17942	3.92738	5	10.8179	11.4943	13.0872		4413.77	4236.84	4236.84	3890.29	3730.86	3494.51	3737.5	3589.58	3270.97	3136.92	2938.2	3142.51		4236.84	4.09814	10.1735	3.92738	BioE_COM-L	3.92738	3737.5	499.335	11.7856
ES	ES24	Arag¾n	0.0102912	4	0	4.75895	4.75895	13.0596	4.75895	28.9132	4.75895	30.0864	5	3.76578	3.95394	4.35519		57924.1	55601.4	55601.4	52955.4	46039.6	37644.3	37023	50832.2	48318.5	42008.3	34348	33781.2		55601.4	13.0596	28.9132	30.0864	BioE_COM-S	13.0596	46039.6	9561.8	17.197
ES	ES30	Comunidad de Madrid	0	4	0	5.04161	5.04161	46.3636	5.04161	59.8701	5.04161	40.4416	5	9.49584	9.94845	11.0653		24084.9	23121.5	23121.5	21955.8	11776.3	8810.84	13076.5	19879.6	18783	10074.5	7537.58	11186.8		23121.5	46.3636	59.8701	40.4416	BioE_COM-L	40.4416	13076.5	10045	43.4443
ES	ES41	Castilla y Le¾n	0.22495	4	0	18.6722	18.6722	46.4876	18.6722	74.4199	18.6722	87.917	5	2.48963	3.06122	4.0678		5477.56	5246.63	5246.63	4266.97	2283.36	1091.49	515.579	4860.21	3929.53	2102.79	1005.18	474.807		5246.63	46.4876	74.4199	87.917	BioE_COM-S	46.4876	2283.36	2963.27	56.4795
ES	ES42	Castilla-La Mancha	0.0302138	4	0	4.70213	4.70213	20.4799	4.70213	38.1331	4.70213	24.2692	5	8.72352	9.10865	10.0719		359838	345340	345340	329101	261702	203605	249231	299453	284169	225971	175806	215203		345340	20.4799	38.1331	24.2692	BioE_COM-S	20.4799	261702	83638	24.219
ES	ES43	Extremadura	0.692464	4	0	5.26059	5.26059	10.6947	5.26059	25.1776	5.26059	16.9224	5	15.4154	16.1064	17.5308		260459	248309	248309	235246	210087	176017	195437	199529	187489	167437	140283	155761		248309	10.6947	25.1776	16.9224	BioE_COM-S	10.6947	210087	38221.5	15.3927
ES	ES51	Cataluña	0.328135	4	0	4.82023	4.82023	4.75202	4.82023	9.15614	4.82023	5.1276	5	3.13117	3.26899	3.75397		124701	119320	119320	113569	108172	103170	107745	109805	104363	99404	94807.7	99012.1		119320	4.75202	9.15614	5.1276	BioE_COM-S	4.75202	108172	11148.3	9.34319
ES	ES52	Comunidad Valenciana	0.155739	4	0	12.2097	12.2097	52.3175	12.2097	69.1924	12.2097	58.2584	5	2.86838	3.1372	3.75072		101771	97548.5	97548.5	85638.1	40834.4	26383	35746.8	90012.9	78803.9	37575.7	24277.6	32894		97548.5	52.3175	69.1924	58.2584	BioE_COM-S	52.3175	40834.4	56714.1	58.1394
ES	ES53	Illes Balears	0.822888	4	0	3.52349	3.52349	11.4892	3.52349	19.9715	3.52349	16.7459	5	5.03356	5.21739	5.42056		8205.28	7812.25	7812.25	7536.98	6671.05	6031.73	6274.84	7048.06	6786.56	6006.84	5431.18	5650.09		7812.25	11.4892	19.9715	16.7459	BioE_COM-S	11.4892	6671.05	1141.2	14.6079
ES	ES61	Andalucía	0.695187	4	0	3.98378	3.98378	9.26462	3.98378	14.7899	3.98378	10.4232	5	2.84966	2.95179	3.24895		1.77117e+06	1.6885e+06	1.6885e+06	1.62123e+06	1.47103e+06	1.38145e+06	1.45225e+06	1.55836e+06	1.49471e+06	1.35623e+06	1.27364e+06	1.33891e+06		1.6885e+06	9.26462	14.7899	10.4232	BioE_COM-S	9.26462	1.47103e+06	217467	12.8793
ES	ES62	Regi¾n de Murcia	0.0569653	4	0	8.2996	8.2996	33.8607	8.2996	71.5873	8.2996	37.4987	5	11.8927	12.8587	14.6154		24575.3	23578.8	23578.8	21621.9	14300.6	6143.37	13514	19735.9	17899.5	11838.6	5085.74	11187.4		23578.8	33.8607	71.5873	37.4987	BioE_COM-S	33.8607	14300.6	9278.27	39.35
ES	ES63	Ciudad Autónoma de Ceuta	0.0569653	4	0	0	0	33.8607	0	71.5873	0	37.4987	5	0	0	0		0	0	0	0	0	0	0	0	0	0	0	0		0	100	100	100		0	0	0	0
ES	ES64	Ciudad Autónoma de Melilla	0.0569653	4	0	0	0	33.8607	0	71.5873	0	37.4987	5	0	0	0		0	0	0	0	0	0	0	0	0	0	0	0		0	100	100	100		0	0	0	0
ES	ES70	Canarias	17.6986	4	0	18.1818	18.1818	39.76	18.1818	84.4351	18.1818	92.1318	5	9.09091	11.1111	14.2857		139.708	110.383	110.383	90.313	54.4046	14.0571	7.10598	95.3304	76.2643	45.9417	11.8704	6.0006		110.383	39.76	84.4351	92.1318	BioE_COM-S	39.76	54.4046	55.978	50.7127
FI	FI19	Lõnsi-Suomi	17.6986	4	0	0	0	39.76	0	84.4351	0	92.1318	0	0	0	0		0	0	0	0	0	0	0	0	0	0	0	0		0	100	100	100		0	0	0	0
FI	FI1B	Helsinki-Uusimaa	17.6986	4	0	0	0	39.76	0	84.4351	0	92.1318	0	0	0	0		0	0	0	0	0	0	0	0	0	0	0	0		0	100	100	100		0	0	0	0
FI	FI1C	Etelõ-Suomi	17.6986	4	0	0	0	39.76	0	84.4351	0	92.1318	0	0	0	0		0	0	0	0	0	0	0	0	0	0	0	0		0	100	100	100		0	0	0	0
FI	FI1D	Pohjois- ja Suomi	17.6986	4	0	0	0	39.76	0	84.4351	0	92.1318	0	0	0	0		0	0	0	0	0	0	0	0	0	0	0	0		0	100	100	100		0	0	0	0
FI	FI20	┼land	17.6986	4	0	0	0	39.76	0	84.4351	0	92.1318	0	0	0	0		0	0	0	0	0	0	0	0	0	0	0	0		0	100	100	100		0	0	0	0
FR	FR10	Ille-de-France	0	4	0	0	0	100	0	100	0	100	5	0	0	0		0	0	0	0	0	0	0	0	0	0	0	0		0	100	100	100		0	0	0	0
FR	FR21	Champagne-Ardenne	0	4	0	0	0	26.8608	0	51.2204	0	56.6941	5	0	0	0		0	0	0	0	0	0	0	0	0	0	0	0		0	100	100	100		0	0	0	0
FR	FR22	Picardie	0	4	0	0	0	68.9829	0	100	0	100	5	0	0	0		0	0	0	0	0	0	0	0	0	0	0	0		0	100	100	100		0	0	0	0
FR	FR23	Haute-Normandie	0	4	0	0	0	100	0	100	0	100	5	0	0	0		0	0	0	0	0	0	0	0	0	0	0	0		0	100	100	100		0	0	0	0
FR	FR24	Centre	0	4	0	0	0	37.2515	0	92.6722	0	89.9561	5	0	0	0		0	0	0	0	0	0	0	0	0	0	0	0		0	100	100	100		0	0	0	0
FR	FR25	Basse-Normandie	0	4	0	0	0	35.6522	0	100	0	100	5	0	0	0		0	0	0	0	0	0	0	0	0	0	0	0		0	100	100	100		0	0	0	0
FR	FR26	Bourgogne	0	4	0	0	0	7.2456	0	33.2978	0	48.082	5	0	0	0		0	0	0	0	0	0	0	0	0	0	0	0		0	100	100	100		0	0	0	0
FR	FR30	Nord - Pas-de-Calais	0	4	0	0	0	100	0	100	0	100	5	0	0	0		0	0	0	0	0	0	0	0	0	0	0	0		0	100	100	100		0	0	0	0
FR	FR41	Lorraine	0	4	0	0	0	100	0	100	0	100	5	0	0	0		0	0	0	0	0	0	0	0	0	0	0	0		0	100	100	100		0	0	0	0
FR	FR42	Alsace	0	4	0	0	0	31.685	0	44.8174	0	62.8132	5	0	0	0		0	0	0	0	0	0	0	0	0	0	0	0		0	100	100	100		0	0	0	0
FR	FR43	Franche-ComtÚ	0	4	0	0	0	74.5474	0	100	0	100	5	0	0	0		0	0	0	0	0	0	0	0	0	0	0	0		0	100	100	100		0	0	0	0
FR	FR51	Pays de la Loire	0	4	0	0	0	30.0082	0	49.624	0	43.8344	5	0	0	0		0	0	0	0	0	0	0	0	0	0	0	0		0	100	100	100		0	0	0	0
FR	FR52	Bretagne	0	4	0	0	0	0	0	100	0	100	5	0	0	0		0	0	0	0	0	0	0	0	0	0	0	0		0	100	100	100		0	0	0	0
FR	FR53	Poitou-Charentes	0.0360008	4	0	0	0	14.3335	0	23.7657	0	12.7546	5	0	0	0		0	0	0	0	0	0	0	0	0	0	0	0		0	100	100	100		0	0	0	0
FR	FR61	Aquitaine	0.057869	4	0	0	0	5.62776	0	10.0065	0	6.31736	5	0	0	0		0	0	0	0	0	0	0	0	0	0	0	0		0	100	100	100		0	0	0	0
FR	FR62	Midi-PyrÚnÚes	0.117193	4	0	0	0	16.3932	0	35.6128	0	24.0452	5	0	0	0		0	0	0	0	0	0	0	0	0	0	0	0		0	100	100	100		0	0	0	0
FR	FR63	Limousin	0	4	0	0	0	40.056	0	76.4706	0	100	5	0	0	0		0	0	0	0	0	0	0	0	0	0	0	0		0	100	100	100		0	0	0	0
FR	FR71	Rh¶ne-Alpes	0.987429	4	0	11.194	11.194	15.8903	11.194	33.888	11.194	30.2583	5	16.4179	18.4874	21.5686		1487.83	1414.21	1414.21	1255.91	1056.34	830.305	875.891	1122.93	972.536	817.998	642.963	678.263		1414.21	15.8903	33.888	30.2583	BioE_COM-S	15.8903	1056.34	357.875	25.3056
FR	FR72	Auvergne	0	4	0	0	0	100	0	100	0	100	5	0	0	0		0	0	0	0	0	0	0	0	0	0	0	0		0	100	100	100		0	0	0	0
FR	FR81	Languedoc-Roussillon	0.144418	4	0	13.2678	13.2678	4.76581	13.2678	8.86176	13.2678	2.4674	5	14.9877	17.2805	19.3103		4824.04	4624.39	4624.39	4010.84	3819.69	3655.41	3911.87	3734.74	3151.86	3001.65	2872.55	3074.09		4624.39	4.76581	8.86176	2.4674	BioE_COM-L	2.4674	3911.87	712.519	15.4078
FR	FR82	Provence-Alpes-C¶te d'Azur	0.250887	4	0	18.1281	18.1281	13.3122	18.1281	28.1424	18.1281	20.2838	5	12.7094	15.2828	17.7347		12029.6	11519.5	11519.5	9431.22	8175.71	6777.04	7518.2	9552.65	7590.37	6579.92	5454.26	6050.75		11519.5	13.3122	28.1424	20.2838	BioE_COM-S	13.3122	8175.71	3343.76	29.027
FR	FR83	Corse	0.593575	4	0	4.28571	4.28571	35.5796	4.28571	69.9721	4.28571	100	5	3.33333	3.48259	3.91061		2591.27	2472.85	2472.85	2366.87	1524.75	710.722	0	2270.9	2170.22	1398.06	651.672	0		2472.85	35.5796	69.9721	100	BioE_COM-S	35.5796	1524.75	948.102	38.3405
FR	FRA1	Guadeloupe	0.593575	4	0	0	0	35.5796	0	69.9721	0	100	5	0	0	0		0	0	0	0	0	0	0	0	0	0	0	0		0	100	100	100		0	0	0	0
FR	FRA2	Martinique	0.593575	4	0	0	0	35.5796	0	69.9721	0	100	5	0	0	0		0	0	0	0	0	0	0	0	0	0	0	0		0	100	100	100		0	0	0	0
FR	FRA3	Guyane	0.593575	4	0	0	0	35.5796	0	69.9721	0	100	5	0	0	0		0	0	0	0	0	0	0	0	0	0	0	0		0	100	100	100		0	0	0	0
FR	FRA4	RÚunion	0.593575	4	0	0	0	35.5796	0	69.9721	0	100	5	0	0	0		0	0	0	0	0	0	0	0	0	0	0	0		0	100	100	100		0	0	0	0
HR	HR03	Jadranska Hrvatska	5.00495	4	0	54.269	54.269	52.1563	54.269	92.087	54.269	100	5	2.92398	6.26598	9.52381		20350.9	18559	18559	8487.22	4060.6	671.59	0	17115.5	7557.64	3615.86	598.033	0		18559	52.1563	92.087	100	BioE_COM-S	52.1563	4060.6	14498.4	78.1206
HR	HR04	Kontinentalna Hrvatska	0	4	0	0	0	19.6388	0	80.6321	0	100	5	0	0	0		0	0	0	0	0	0	0	0	0	0	0	0		0	100	100	100		0	0	0	0
HU	HU10	Közép-Magyarország	0	4	0	0	0	53.238	0	99.4603	0	100	0	0	0	0		0	0	0	0	0	0	0	0	0	0	0	0		0	100	100	100		0	0	0	0
HU	HU21	Közép-Dunántúl	0	4	0	0	0	88.6598	0	100	0	100	0	0	0	0		0	0	0	0	0	0	0	0	0	0	0	0		0	100	100	100		0	0	0	0
HU	HU22	Nyugat-Dunántúl	0	4	0	0	0	92.598	0	100	0	100	0	0	0	0		0	0	0	0	0	0	0	0	0	0	0	0		0	100	100	100		0	0	0	0
HU	HU23	Dél-Dunántúl	0	4	0	0	0	70.5856	0	99.9404	0	100	0	0	0	0		0	0	0	0	0	0	0	0	0	0	0	0		0	100	100	100		0	0	0	0
HU	HU31	Észak-Magyarország	0	4	0	0	0	38.3548	0	91.1837	0	99.449	0	0	0	0		0	0	0	0	0	0	0	0	0	0	0	0		0	100	100	100		0	0	0	0
HU	HU32	Észak-Alföld	0	4	0	0	0	25.7606	0	43.2429	0	26.1133	0	0	0	0		0	0	0	0	0	0	0	0	0	0	0	0		0	100	100	100		0	0	0	0
HU	HU33	Dél-Alföld	0	4	0	0	0	32.1212	0	58.3377	0	43.8182	0	0	0	0		0	0	0	0	0	0	0	0	0	0	0	0		0	100	100	100		0	0	0	0
IE	IE01	Border, Midland and Western	0	4	0	0	0	32.1212	0	58.3377	0	43.8182	0	0	0	0		0	0	0	0	0	0	0	0	0	0	0	0		0	100	100	100		0	0	0	0
IE	IE02	Southern and Eastern	0	4	0	0	0	32.1212	0	58.3377	0	43.8182	0	0	0	0		0	0	0	0	0	0	0	0	0	0	0	0		0	100	100	100		0	0	0	0
IT	ITC1	Piemonte	0.217174	4	0	15.6863	15.6863	5.9224	15.6863	10.6239	15.6863	12.5902	5	1.96078	1.16279	1.38889		1123.16	1075.89	1075.89	907.127	853.403	810.754	792.918	1002.06	851.75	801.306	761.261	744.513		1075.89	5.9224	10.6239	12.5902	BioE_COM-S	5.9224	853.403	222.492	20.6797
IT	ITC2	Valle d'Aosta/VallÚe d'Aoste	23.4848	4	0	40	40	100	40	100	40	100	5	0	0	0		0	0	0	0	0	0	0	0	0	0	0	0		0	100	100	100		0	0	0	0
IT	ITC3	Liguria	5.53111	4	0	57.6058	57.6058	41.0434	57.6058	52.7656	57.6058	53.4884	5	2.79028	5.73248	10.828		12992.4	11782.8	11782.8	4995.25	2945.03	2359.48	2323.37	10881.4	4473.45	2637.39	2113.01	2080.67		11782.8	41.0434	52.7656	53.4884	BioE_COM-S	41.0434	2945.03	8837.81	75.0058
IT	ITC4	Lombardia	4.37391	4	0	23.9796	23.9796	13.4466	23.9796	26.0685	23.9796	21.3697	5	9.18367	10.7383	12.5		2177.96	1999.39	1999.39	1519.95	1315.57	1123.72	1195.14	1724.99	1288.9	1115.58	952.9	1013.46		1999.39	13.4466	26.0685	21.3697	BioE_COM-S	13.4466	1315.57	683.828	34.2018
IT	ITF1	Abruzzo	1.25987	4	0	36.6915	36.6915	9.26953	36.6915	16.7309	36.6915	11.8154	5	5.74686	8.89379	14.2199		51613.5	48924.7	48924.7	30973.5	28102.4	25791.4	27313.9	43807.4	26807.8	24322.9	22322.7	23640.4		48924.7	9.26953	16.7309	11.8154	BioE_COM-S	9.26953	28102.4	20822.3	42.5599
IT	ITF2	Molise	0.689655	4	0	29.3218	29.3218	14.063	29.3218	29.5052	29.3218	24.7676	5	3.25798	4.51552	5.83554		18047.3	17205.9	17205.9	12160.8	10450.7	8572.76	9148.89	15813.1	11031.1	9479.83	7776.37	8298.98		17205.9	14.063	29.5052	24.7676	BioE_COM-S	14.063	10450.7	6755.27	39.2613
IT	ITF3	Campania	2.94054	4	0	40.7188	40.7188	11.2469	40.7188	20.448	40.7188	9.85529	5	4.47535	7.29384	11.7373		90974.2	84767.1	84767.1	50251	44599.3	39975.6	45298.6	76924.8	44256.5	39279	35206.9	39894.9		84767.1	11.2469	20.448	9.85529	BioE_COM-L	9.85529	45298.6	39468.6	46.5611
IT	ITF4	Puglia	0.425932	4	0	28.6487	28.6487	1.94955	28.6487	4.63333	28.6487	3.35229	5	10.8042	15.0409	20.5717		488688	467142	467142	333312	326814	317868	322138	395837	269020	263775	256555	260001		467142	1.94955	4.63333	3.35229	BioE_COM-S	1.94955	326814	140328	30.0398
IT	ITF5	Basilicata	0.460429	4	0	31.8214	31.8214	26.7049	31.8214	42.8096	31.8214	23.6302	5	16.8571	24.0964	31.5441		34235.4	32714.6	32714.6	22304.4	16348	12755.9	17033.8	25839.9	16083.3	11788.3	9198.11	12282.8		32714.6	26.7049	42.8096	23.6302	BioE_COM-L	23.6302	17033.8	15680.8	47.9322
IT	ITF6	Calabria	1.16964	4	0	28.503	28.503	4.15599	28.503	7.19301	28.503	3.77383	5	23.9686	33.2982	43.955		243927	231431	231431	165466	158589	153564	159222	167162	104850	100493	97308.5	100894		231431	4.15599	7.19301	3.77383	BioE_COM-L	3.77383	159222	72209.3	31.2012
IT	ITG1	Sicilia	1.77257	4	0	31.0274	31.0274	23.1852	31.0274	36.9344	31.0274	22.2833	5	11.057	15.8777	22.3772		185593	175011	175011	120710	92723	76126.3	93811.7	147877	96466.7	74100.6	60837.2	74970.7		175011	23.1852	36.9344	22.2833	BioE_COM-L	22.2833	93811.7	81199.7	46.3968
IT	ITG2	Sardegna	0.271239	4	0	27.3375	27.3375	31.0084	27.3375	60.6219	27.3375	73.283	5	6.03236	8.18868	11.0278		47380.9	45362.3	45362.3	32961.3	22740.5	12979.5	8806.29	40494.6	28749.1	19834.5	11320.9	7680.91		45362.3	31.0084	60.6219	73.283	BioE_COM-S	31.0084	22740.5	22621.7	49.869
IT	ITH1	Provincia Autonoma Bolzano/Bozen	18.7184	4	0	0	0	2.60764	0	5.21528	0	9.82414	5	0	0	0		0	0	0	0	0	0	0	0	0	0	0	0		0	100	100	100		0	0	0	0
IT	ITH2	Provincia Autonoma Trento	17.3829	4	0	52.6316	52.6316	15.4273	52.6316	23.0082	52.6316	13.3752	5	10.5263	16.6667	10		430.146	341.159	341.159	161.602	136.671	124.42	139.987	289.985	127.935	108.198	98.4992	110.823		341.159	15.4273	23.0082	13.3752	BioE_COM-L	13.3752	139.987	201.172	58.9672
IT	ITH3	Veneto	2.97166	4	0	23.9382	23.9382	7.03257	23.9382	11.6751	23.9382	9.78215	5	4.82625	5.83756	6.41509		5842.16	5441.81	5441.81	4139.14	3848.05	3655.89	3734.24	4920.21	3702.64	3442.24	3270.35	3340.44		5441.81	7.03257	11.6751	9.78215	BioE_COM-S	7.03257	3848.05	1593.76	29.2873
IT	ITH4	Friuli-Venezia Giulia	0	4	0	18.6047	18.6047	20.5025	18.6047	38.4029	18.6047	48.6765	5	9.30233	11.4286	13.7931		488.939	469.381	469.381	382.055	303.724	235.335	196.084	404.432	321.472	255.562	198.017	164.99		469.381	20.5025	38.4029	48.6765	BioE_COM-S	20.5025	303.724	165.657	35.2927
IT	ITH5	Emilia-Romagna	0.0263852	4	0	16.0105	16.0105	17.1768	16.0105	29.1293	16.0105	24.7493	5	8.92388	10.3125	12.6638		4323.14	4149.12	4149.12	3484.83	2886.25	2469.72	2622.36	3589.92	2969.18	2459.17	2104.28	2234.33		4149.12	17.1768	29.1293	24.7493	BioE_COM-S	17.1768	2886.25	1262.88	30.4372
IT	ITI1	Toscana	0.451054	4	0	15.3085	15.3085	14.3174	15.3085	30.4814	15.3085	21.3088	5	9.07409	10.5344	12.5504		110607	105704	105704	89522	76704.8	62234.5	70446	91306.4	76086.8	65193.1	52894.5	59873.7		105704	14.3174	30.4814	21.3088	BioE_COM-S	14.3174	76704.8	28998.8	27.4341
IT	ITI2	Umbria	2.66376	4	0	21.4215	21.4215	22.0524	21.4215	65.6914	21.4215	53.0713	5	13.9849	17.5461	21.8521		35282.5	32968.9	32968.9	25906.5	20193.5	8888.14	12157.6	26940.3	20292.9	15817.8	6962.19	9523.17		32968.9	22.0524	65.6914	53.0713	BioE_COM-S	22.0524	20193.5	12775.4	38.75
IT	ITI3	Marche	0	4	0	19.097	19.097	64.5556	19.097	88	19.097	93.2222	5	12.1392	14.6386	17.1934		16088.4	15444.9	15444.9	12495.4	4428.92	1499.45	846.91	12891.5	10132.9	3591.56	1215.95	686.787		15444.9	64.5556	88	93.2222	BioE_COM-S	64.5556	4428.92	11016	71.3244
IT	ITI4	Lazio	2.8532	4	0	39.5166	39.5166	13.9902	39.5166	34.8754	39.5166	30.3477	5	7.6809	12.0863	17.8571		84223	78547.2	78547.2	47508	40861.5	30939.4	33090.4	68888.3	39677.7	34126.7	25840	27636.5		78547.2	13.9902	34.8754	30.3477	BioE_COM-S	13.9902	40861.5	37685.7	47.9784
LT	LT00	Lietuva	0	4	0	0	0	42.0103	0	100	0	100	0	0	0	0		0	0	0	0	0	0	0	0	0	0	0	0		0	100	100	100		0	0	0	0
LU	LU00	Luxembourg	0	4	0	0	0	100	0	100	0	100	0	0	0	0		0	0	0	0	0	0	0	0	0	0	0	0		0	100	100	100		0	0	0	0
LV	LV00	Latvija	0	4	0	0	0	72.3485	0	100	0	100	0	0	0	0		0	0	0	0	0	0	0	0	0	0	0	0		0	100	100	100		0	0	0	0
MT	MT00	Malta	0	4	0	50	50	100	50	100	50	100	5	7.14286	14.2857	33.3333		201.016	192.976	192.976	96.4878	0	0	0	170.232	78.5686	0	0	0		192.976	100	100	100		100	0	192.976	100
NL	NL11	Groningen	0	4	0	0	0	100	0	100	0	100	0	0	0	0		0	0	0	0	0	0	0	0	0	0	0	0		0	100	100	100		0	0	0	0
NL	NL12	Friesland (NL)	0	4	0	0	0	100	0	100	0	100	0	0	0	0		0	0	0	0	0	0	0	0	0	0	0	0		0	100	100	100		0	0	0	0
NL	NL13	Drenthe	0	4	0	0	0	100	0	100	0	100	0	0	0	0		0	0	0	0	0	0	0	0	0	0	0	0		0	100	100	100		0	0	0	0
NL	NL21	Overijssel	0	4	0	0	0	100	0	100	0	100	0	0	0	0		0	0	0	0	0	0	0	0	0	0	0	0		0	100	100	100		0	0	0	0
NL	NL22	Gelderland	0	4	0	0	0	44.7581	0	73.7903	0	100	0	0	0	0		0	0	0	0	0	0	0	0	0	0	0	0		0	100	100	100		0	0	0	0
NL	NL23	Flevoland	0	4	0	0	0	69.4184	0	100	0	100	0	0	0	0		0	0	0	0	0	0	0	0	0	0	0	0		0	100	100	100		0	0	0	0
NL	NL31	Utrecht	0	4	0	0	0	18.9189	0	100	0	100	0	0	0	0		0	0	0	0	0	0	0	0	0	0	0	0		0	100	100	100		0	0	0	0
NL	NL32	Noord-Holland	0	4	0	0	0	14.1176	0	100	0	100	0	0	0	0		0	0	0	0	0	0	0	0	0	0	0	0		0	100	100	100		0	0	0	0
NL	NL33	Zuid-Holland	0	4	0	0	0	6.25	0	100	0	100	0	0	0	0		0	0	0	0	0	0	0	0	0	0	0	0		0	100	100	100		0	0	0	0
NL	NL34	Zeeland	0.37594	4	0	0	0	46.9925	0	100	0	100	0	0	0	0		0	0	0	0	0	0	0	0	0	0	0	0		0	100	100	100		0	0	0	0
NL	NL41	Noord-Brabant	0	4	0	0	0	100	0	100	0	100	0	0	0	0		0	0	0	0	0	0	0	0	0	0	0	0		0	100	100	100		0	0	0	0
NL	NL42	Limburg (NL)	0	4	0	0	0	7.85714	0	100	0	100	0	0	0	0		0	0	0	0	0	0	0	0	0	0	0	0		0	100	100	100		0	0	0	0
PL	PL11	Lodzkie	0	4	0	0	0	5.74253	0	8.755	0	18.8515	0	0	0	0		0	0	0	0	0	0	0	0	0	0	0	0		0	100	100	100		0	0	0	0
PL	PL12	Mazowieckie	0	4	0	0	0	3.35825	0	7.10217	0	6.84704	0	0	0	0		0	0	0	0	0	0	0	0	0	0	0	0		0	100	100	100		0	0	0	0
PL	PL21	Malopolskie	0	4	0	0	0	17.8306	0	59.4354	0	100	0	0	0	0		0	0	0	0	0	0	0	0	0	0	0	0		0	100	100	100		0	0	0	0
PL	PL22	Slaskie	0	4	0	0	0	25.9843	0	100	0	100	0	0	0	0		0	0	0	0	0	0	0	0	0	0	0	0		0	100	100	100		0	0	0	0
PL	PL31	Lubelskie	0	4	0	0	0	9.04847	0	17.3788	0	21.6517	0	0	0	0		0	0	0	0	0	0	0	0	0	0	0	0		0	100	100	100		0	0	0	0
PL	PL32	Podkarpackie	0	4	0	0	0	48.7719	0	95.0877	0	91.5789	0	0	0	0		0	0	0	0	0	0	0	0	0	0	0	0		0	100	100	100		0	0	0	0
PL	PL33	Swietokrzyskie	0	4	0	0	0	2.99658	0	6.91353	0	10.4024	0	0	0	0		0	0	0	0	0	0	0	0	0	0	0	0		0	100	100	100		0	0	0	0
PL	PL34	Podlaskie	0	4	0	0	0	49.4505	0	100	0	100	0	0	0	0		0	0	0	0	0	0	0	0	0	0	0	0		0	100	100	100		0	0	0	0
PL	PL41	Wielkopolskie	0	4	0	0	0	5.4883	0	24.0517	0	56.0129	0	0	0	0		0	0	0	0	0	0	0	0	0	0	0	0		0	100	100	100		0	0	0	0
PL	PL42	Zachodniopomorskie	0.724638	4	0	0	0	9.05797	0	100	0	100	0	0	0	0		0	0	0	0	0	0	0	0	0	0	0	0		0	100	100	100		0	0	0	0
PL	PL43	Lubuskie	0	4	0	0	0	16.6065	0	100	0	100	0	0	0	0		0	0	0	0	0	0	0	0	0	0	0	0		0	100	100	100		0	0	0	0
PL	PL51	Dolnoslaskie	0	4	0	0	0	23.0228	0	75.3954	0	100	0	0	0	0		0	0	0	0	0	0	0	0	0	0	0	0		0	100	100	100		0	0	0	0
PL	PL52	Opolskie	0	4	0	0	0	45.9016	0	100	0	100	0	0	0	0		0	0	0	0	0	0	0	0	0	0	0	0		0	100	100	100		0	0	0	0
PL	PL61	Kujawsko-Pomorskie	0	4	0	0	0	43.254	0	100	0	100	0	0	0	0		0	0	0	0	0	0	0	0	0	0	0	0		0	100	100	100		0	0	0	0
PL	PL62	Warminsko-Mazurskie	0	4	0	0	0	0	0	100	0	100	0	0	0	0		0	0	0	0	0	0	0	0	0	0	0	0		0	100	100	100		0	0	0	0
PL	PL63	Pomorskie	0	4	0	0	0	26.9565	0	100	0	100	0	0	0	0		0	0	0	0	0	0	0	0	0	0	0	0		0	100	100	100		0	0	0	0
PT	PT11	Norte	0.85056	4	0	10.4531	10.4531	8.43347	10.4531	15.4407	10.4531	7.30937	5	4.39921	4.91274	6.42912		92317.1	87870.6	87870.6	78685.4	72049.5	66535.8	72934	79804.7	71078.8	65084.4	60103.7	65883.4		87870.6	8.43347	15.4407	7.30937	BioE_COM-L	7.30937	72934	14936.6	16.9984
PT	PT15	Algarve	0.325504	4	0	13.0952	13.0952	9.20347	13.0952	23.7171	13.0952	21.5216	5	0.119048	0.136986	0.196464		11180.8	10698.6	10698.6	9297.6	8441.9	7092.48	7296.61	10151.6	8820.62	8008.82	6728.62	6922.29		10698.6	9.20347	23.7171	21.5216	BioE_COM-S	9.20347	8441.9	2256.71	21.0935
PT	PT16	Centro (P)	0.11461	4	0	26.5597	26.5597	30.1647	26.5597	56.2411	26.5597	34.862	5	3.63286	4.94669	7.66703		49553.4	47516.7	47516.7	34896.4	24370	15270.3	22730.8	43501	31511.7	22006.3	13789.2	20526.1		47516.7	30.1647	56.2411	34.862	BioE_COM-S	30.1647	24370	23146.7	48.7128
PT	PT17	Centro (P)	0	4	0	11.1111	11.1111	22.1436	11.1111	41.9172	11.1111	56.7386	5	0	0	0		9711.02	9322.58	9322.58	8286.74	6451.75	4813.17	3584.96	8856.45	7872.4	6129.17	4572.51	3405.71		9322.58	22.1436	41.9172	56.7386	BioE_COM-S	22.1436	6451.75	2870.83	30.7943
PT	PT18	Centro (P)	0	4	0	3.95323	3.95323	22.2425	3.95323	40.866	3.95323	22.3361	5	2.61619	2.72388	2.93105		131529	126268	126268	121277	94301.5	71715.6	94188.1	116817	112074	87146.2	66274.1	87041.4		126268	22.2425	40.866	22.3361	BioE_COM-S	22.2425	94301.5	31966.7	25.3165
PT	PT20	RegiÒo Aut¾noma dos Aþores	2.66667	4	0	0	0	100	0	100	0	100	5	0	0	0		0	0	0	0	0	0	0	0	0	0	0	0		0	100	100	100		0	0	0	0
PT	PT30	RegiÒo Aut¾noma da Madeira	25.1309	4	0	0	0	59.6859	0	100	0	100	5	0	0	0		0	0	0	0	0	0	0	0	0	0	0	0		0	100	100	100		0	0	0	0
RO	RO11	Nord-Vest	0	4	0	0	0	64.1074	0	85.414	0	90.073	0	0	0	0		0	0	0	0	0	0	0	0	0	0	0	0		0	100	100	100		0	0	0	0
RO	RO12	Centru	0.0448511	4	0	0	0	92.6444	0	100	0	100	0	0	0	0		0	0	0	0	0	0	0	0	0	0	0	0		0	100	100	100		0	0	0	0
RO	RO21	Nord-Est	0	4	0	0	0	78.7461	0	100	0	100	0	0	0	0		0	0	0	0	0	0	0	0	0	0	0	0		0	100	100	100		0	0	0	0
RO	RO22	Sud-Est	0.0149629	4	0	0	0	46.4927	0	75.8828	0	60.9917	0	0	0	0		0	0	0	0	0	0	0	0	0	0	0	0		0	100	100	100		0	0	0	0
RO	RO31	Sud - Muntenia	0	4	0	0	0	43.8393	0	54.2651	0	43.3466	0	0	0	0		0	0	0	0	0	0	0	0	0	0	0	0		0	100	100	100		0	0	0	0
RO	RO32	Bucuresti - Ilfov	0	4	0	0	0	100	0	100	0	100	0	0	0	0		0	0	0	0	0	0	0	0	0	0	0	0		0	100	100	100		0	0	0	0
RO	RO41	Sud-Vest Oltenia	0.0152151	4	0	0	0	71.3499	0	83.3029	0	79.8339	0	0	0	0		0	0	0	0	0	0	0	0	0	0	0	0		0	100	100	100		0	0	0	0
RO	RO42	Vest	0.17963	4	0	0	0	64.9123	0	89.306	0	93.6171	0	0	0	0		0	0	0	0	0	0	0	0	0	0	0	0		0	100	100	100		0	0	0	0
SE	SE11	Stockholm	0	4	0	0	0	100	0	100	0	100	0	0	0	0		0	0	0	0	0	0	0	0	0	0	0	0		0	100	100	100		0	0	0	0
SE	SE12	Ostra Mellansverige	0	4	0	0	0	100	0	100	0	100	0	0	0	0		0	0	0	0	0	0	0	0	0	0	0	0		0	100	100	100		0	0	0	0
SE	SE21	SmÕland med oarna	0	4	0	0	0	100	0	100	0	100	0	0	0	0		0	0	0	0	0	0	0	0	0	0	0	0		0	100	100	100		0	0	0	0
SE	SE22	Sydsverige	0.283286	4	0	0	0	46.4589	0	100	0	100	0	0	0	0		0	0	0	0	0	0	0	0	0	0	0	0		0	100	100	100		0	0	0	0
SE	SE23	Võstsverige	0	4	0	0	0	100	0	100	0	100	0	0	0	0		0	0	0	0	0	0	0	0	0	0	0	0		0	100	100	100		0	0	0	0
SE	SE31	Norra Mellansverige	0	4	0	0	0	100	0	100	0	100	0	0	0	0		0	0	0	0	0	0	0	0	0	0	0	0		0	100	100	100		0	0	0	0
SE	SE32	Mellersta Norrland	0	4	0	0	0	100	0	100	0	100	0	0	0	0		0	0	0	0	0	0	0	0	0	0	0	0		0	100	100	100		0	0	0	0
SE	SE33	Ovre Norrland	0	4	0	0	0	100	0	100	0	100	0	0	0	0		0	0	0	0	0	0	0	0	0	0	0	0		0	100	100	100		0	0	0	0
SI	SI03	Vzhodna Slovenija	0.652316	4	0	0	0	55.3164	0	90.0848	0	100	5	0	0	0		0	0	0	0	0	0	0	0	0	0	0	0		0	100	100	100		0	0	0	0
SI	SI04	Zahodna Slovenija	0.694444	4	0	57.3034	57.3034	36.0243	57.3034	57.2917	57.3034	48.2639	5	8.98876	15.7895	21.4286		994.32	947.918	947.918	404.729	258.928	172.853	209.391	819.576	323.783	207.143	138.282	167.513		947.918	36.0243	57.2917	48.2639	BioE_COM-S	36.0243	258.928	688.99	72.6845
SK	SK01	Bratislavsky	0	4	0	0	0	62.6523	0	100	0	100	0	0	0	0		0	0	0	0	0	0	0	0	0	0	0	0		0	100	100	100		0	0	0	0
SK	SK02	Zapadne Slovensko	0	4	0	0	0	94.5463	0	100	0	100	0	0	0	0		0	0	0	0	0	0	0	0	0	0	0	0		0	100	100	100		0	0	0	0
SK	SK03	Stredne Slovensko	0	4	0	0	0	100	0	100	0	100	0	0	0	0		0	0	0	0	0	0	0	0	0	0	0	0		0	100	100	100		0	0	0	0
SK	SK04	Vychodne Slovensko	0.157853	4	0	0	0	99.7632	0	100	0	100	0	0	0	0		0	0	0	0	0	0	0	0	0	0	0	0		0	100	100	100		0	0	0	0
UK	UKC1	Tees Valley and Durham	0.157853	4	0	0	0	99.7632	0	100	0	100	0	0	0	0		0	0	0	0	0	0	0	0	0	0	0	0		0	100	100	100		0	0	0	0
UK	UKC2	Northumberland and Tyne and Wear	0.157853	4	0	0	0	99.7632	0	100	0	100	0	0	0	0		0	0	0	0	0	0	0	0	0	0	0	0		0	100	100	100		0	0	0	0
UK	UKD1	Cumbria	0.157853	4	0	0	0	99.7632	0	100	0	100	0	0	0	0		0	0	0	0	0	0	0	0	0	0	0	0		0	100	100	100		0	0	0	0
UK	UKD3	Greater Manchester	0.157853	4	0	0	0	99.7632	0	100	0	100	0	0	0	0		0	0	0	0	0	0	0	0	0	0	0	0		0	100	100	100		0	0	0	0
UK	UKD4	Lancashire	0.157853	4	0	0	0	99.7632	0	100	0	100	0	0	0	0		0	0	0	0	0	0	0	0	0	0	0	0		0	100	100	100		0	0	0	0
UK	UKD6	Cheshire	0.157853	4	0	0	0	99.7632	0	100	0	100	0	0	0	0		0	0	0	0	0	0	0	0	0	0	0	0		0	100	100	100		0	0	0	0
UK	UKD7	Merseyside	0.157853	4	0	0	0	99.7632	0	100	0	100	0	0	0	0		0	0	0	0	0	0	0	0	0	0	0	0		0	100	100	100		0	0	0	0
UK	UKE1	East Yorkshire and Northern Lincolnshire	0.157853	4	0	0	0	99.7632	0	100	0	100	0	0	0	0		0	0	0	0	0	0	0	0	0	0	0	0		0	100	100	100		0	0	0	0
UK	UKE2	North Yorkshire	0.157853	4	0	0	0	99.7632	0	100	0	100	0	0	0	0		0	0	0	0	0	0	0	0	0	0	0	0		0	100	100	100		0	0	0	0
UK	UKE3	South Yorkshire	0.157853	4	0	0	0	99.7632	0	100	0	100	0	0	0	0		0	0	0	0	0	0	0	0	0	0	0	0		0	100	100	100		0	0	0	0
UK	UKE4	West Yorkshire	0.157853	4	0	0	0	99.7632	0	100	0	100	0	0	0	0		0	0	0	0	0	0	0	0	0	0	0	0		0	100	100	100		0	0	0	0
UK	UKF1	Derbyshire and Nottinghamshire	0	4	0	0	0	100	0	100	0	100	0	0	0	0		0	0	0	0	0	0	0	0	0	0	0	0		0	100	100	100		0	0	0	0
UK	UKF2	Leicestershire, Rutland and Northamptonshire	0	4	0	0	0	100	0	100	0	100	0	0	0	0		0	0	0	0	0	0	0	0	0	0	0	0		0	100	100	100		0	0	0	0
UK	UKF3	Lincolnshire	0	4	0	0	0	100	0	100	0	100	0	0	0	0		0	0	0	0	0	0	0	0	0	0	0	0		0	100	100	100		0	0	0	0
UK	UKG1	Herefordshire, Worcestershire and Warwickshire	0	4	0	0	0	100	0	100	0	100	0	0	0	0		0	0	0	0	0	0	0	0	0	0	0	0		0	100	100	100		0	0	0	0
UK	UKG2	Shropshire and Staffordshire	0	4	0	0	0	100	0	100	0	100	0	0	0	0		0	0	0	0	0	0	0	0	0	0	0	0		0	100	100	100		0	0	0	0
UK	UKG3	West Midlands	0	4	0	0	0	100	0	100	0	100	0	0	0	0		0	0	0	0	0	0	0	0	0	0	0	0		0	100	100	100		0	0	0	0
UK	UKH1	East Anglia	0	4	0	0	0	100	0	100	0	100	0	0	0	0		0	0	0	0	0	0	0	0	0	0	0	0		0	100	100	100		0	0	0	0
UK	UKH2	Bedfordshire and Hertfordshire	0	4	0	0	0	100	0	100	0	100	0	0	0	0		0	0	0	0	0	0	0	0	0	0	0	0		0	100	100	100		0	0	0	0
UK	UKH3	Essex	0	4	0	0	0	100	0	100	0	100	0	0	0	0		0	0	0	0	0	0	0	0	0	0	0	0		0	100	100	100		0	0	0	0
UK	UKI3	Inner London	0	4	0	0	0	100	0	100	0	100	0	0	0	0		0	0	0	0	0	0	0	0	0	0	0	0		0	100	100	100		0	0	0	0
UK	UKI4	Inner London	0	4	0	0	0	100	0	100	0	100	0	0	0	0		0	0	0	0	0	0	0	0	0	0	0	0		0	100	100	100		0	0	0	0
UK	UKI5	Outer London	0	4	0	0	0	100	0	100	0	100	0	0	0	0		0	0	0	0	0	0	0	0	0	0	0	0		0	100	100	100		0	0	0	0
UK	UKI6	Outer London	0	4	0	0	0	100	0	100	0	100	0	0	0	0		0	0	0	0	0	0	0	0	0	0	0	0		0	100	100	100		0	0	0	0
UK	UKI7	Outer London	0	4	0	0	0	100	0	100	0	100	0	0	0	0		0	0	0	0	0	0	0	0	0	0	0	0		0	100	100	100		0	0	0	0
UK	UKJ1	Berkshire, Buckinghamshire and Oxfordshire	0	4	0	0	0	100	0	100	0	100	0	0	0	0		0	0	0	0	0	0	0	0	0	0	0	0		0	100	100	100		0	0	0	0
UK	UKJ2	Berkshire, Buckinghamshire and Oxfordshire	0	4	0	0	0	41.8605	0	100	0	100	0	0	0	0		0	0	0	0	0	0	0	0	0	0	0	0		0	100	100	100		0	0	0	0
UK	UKJ3	Hampshire and Isle of Wight	0	4	0	0	0	100	0	100	0	100	0	0	0	0		0	0	0	0	0	0	0	0	0	0	0	0		0	100	100	100		0	0	0	0
UK	UKJ4	Hampshire and Isle of Wight	0	4	0	0	0	0	0	0	0	0	0	0	0	0		0	0	0	0	0	0	0	0	0	0	0	0		0	100	100	100		0	0	0	0
UK	UKK1	Gloucestershire, Wiltshire and Bristol/Bath area	0	4	0	0	0	0	0	0	0	0	0	0	0	0		0	0	0	0	0	0	0	0	0	0	0	0		0	100	100	100		0	0	0	0
UK	UKK2	Dorset and Somerset	0	4	0	0	0	0	0	100	0	100	0	0	0	0		0	0	0	0	0	0	0	0	0	0	0	0		0	100	100	100		0	0	0	0
UK	UKK3	Cornwall and Isles of Scilly	0	4	0	0	0	0	0	100	0	100	0	0	0	0		0	0	0	0	0	0	0	0	0	0	0	0		0	100	100	100		0	0	0	0
UK	UKK4	Devon	0	4	0	0	0	0	0	100	0	100	0	0	0	0		0	0	0	0	0	0	0	0	0	0	0	0		0	100	100	100		0	0	0	0
UK	UKL1	West Wales and The Valleys	10.4895	4	0	0	0	100	0	100	0	100	0	0	0	0		0	0	0	0	0	0	0	0	0	0	0	0		0	100	100	100		0	0	0	0
UK	UKL2	East Wales	10.4895	4	0	0	0	100	0	100	0	100	0	0	0	0		0	0	0	0	0	0	0	0	0	0	0	0		0	100	100	100		0	0	0	0
UK	UKM2	Eastern Scotland	10.4895	4	0	0	0	100	0	100	0	100	0	0	0	0		0	0	0	0	0	0	0	0	0	0	0	0		0	100	100	100		0	0	0	0
UK	UKM3	South Western Scotland	10.4895	4	0	0	0	100	0	100	0	100	0	0	0	0		0	0	0	0	0	0	0	0	0	0	0	0		0	100	100	100		0	0	0	0
UK	UKM5	North Eastern Scotland	10.4895	4	0	0	0	100	0	100	0	100	0	0	0	0		0	0	0	0	0	0	0	0	0	0	0	0		0	100	100	100		0	0	0	0
UK	UKM6	Highlands and Islands	10.4895	4	0	0	0	100	0	100	0	100	0	0	0	0		0	0	0	0	0	0	0	0	0	0	0	0		0	100	100	100		0	0	0	0
UK	UKN0	Northern Ireland	10.4895	4	0	0	0	100	0	100	0	100	0	0	0	0		0	0	0	0	0	0	0	0	0	0	0	0		0	100	100	100		0	0	0	0

## Sheet: Vineyard
VINEYARD			CRT_SLOPE	CRT_LOSS	CRE_WASTE	CRE_SELF	CRE_>2ha	CRE_COM-S	CRE_>2ha	CRE_COM-M	CRE_>2ha	CRE_COM-L	CRI_COMP	CRI_>0ha	CRI_>2ha	CRI_>5ha		BioTH	BioT	BioE_WASTE	BioE_SELF	BioE_COM-S	BioE_COM-M	BioE_COM-L	BioI_WASTE	BioI_SELF	BioI_COM-S	BioI_COM-M	BioI_COM-L		BioT	CRE_COM			Best economic case	CR BEST Economic	BioE_COM_BEST	GAP = BioT - BioE_COM_BEST
Country	NUTs2	NAME	(%)	(%)	(%)	(%)	(%)	(%)	(%)	(%)	(%)	(%)	(%)	(%)	(%)	(%)		t DM·yr-1	t DM·yr-1	t DM·yr-1	t DM·yr-1	t DM·yr-1	t DM·yr-1	t DM·yr-1	t DM·yr-1	t DM·yr-1	t DM·yr-1	t DM·yr-1	t DM·yr-1		(DM t)	S	M	L		(%)	(DM t)	(DM t)	(%)
AT	AT11	Burgenland (A)	0	12	0	6.6311	6.6311	30.5769	6.6311	72.6573	6.6311	78.8112	4	10.1372	10.6939	11.4497		13815.4	12157.5	12157.5	11351.3	7880.45	3103.76	2405.21	10488.1	9731.94	6756.21	2660.97	2062.08		12157.5	30.5769	72.6573	78.8112	BioE_COM-S	30.5769	7880.45	4277.07	35.1804
AT	AT12	Nieder÷sterreich	0.0217628	12	0	6.95621	6.95621	32.4592	6.95621	73.7106	6.95621	74.3308	4	6.03814	6.37571	6.71453		29821	26236.7	26236.7	24411.6	16487.8	6417.69	6266.28	23666.4	21941	14819.1	5768.17	5632.09		26236.7	32.4592	73.7106	74.3308	BioE_COM-S	32.4592	16487.8	9748.91	37.1575
AT	AT13	Wien	0	12	0	12.963	12.963	100	12.963	100	12.963	100	4	0	0	0		568.62	500.386	500.386	435.521	0	0	0	480.37	418.1	0	0	0		500.386	100	100	100		100	0	500.386	100
AT	AT21	Kõrnten	0	12	0	20	20	100	20	100	20	100	4	20	25	50		52.65	46.332	46.332	37.0656	0	0	0	35.583	26.6872	0	0	0		46.332	100	100	100		100	0	46.332	100
AT	AT22	Steiermark	0	12	0	6.15385	6.15385	40.3194	6.15385	99.8004	6.15385	100	4	3.95604	4.21546	4.92754		4791.15	4216.21	4216.21	3956.75	2361.42	7.89771	0	3887.44	3638.36	2171.4	7.26219	0		4216.21	40.3194	99.8004	100	BioE_COM-S	40.3194	2361.42	1854.8	43.992
AT	AT31	Ober÷sterreich	0	12	0	0	0	40.3194	0	99.8004	0	100	4	33.3333	33.3333	33.3333		21.06	18.5328	18.5328	18.5328	11.0605	0.0369916	0	11.861	11.861	7.07872	0.0236746	0		18.5328	100	100	100	BioE_COM-S	40.3194	11.0605	7.47231	40.3194
AT	AT32	Salzburg	0	12	0	0	0	40.3194	0	99.8004	0	100	4	0	0	0		0	0	0	0	0	0	0	0	0	0	0	0		0	100	100	100		0	0	0	0
AT	AT33	Tirol	0	12	0	0	0	40.3194	0	99.8004	0	100	4	0	0	0		0	0	0	0	0	0	0	0	0	0	0	0		0	100	100	100		0	0	0	0
AT	AT34	Vorarlberg	0	12	0	0	0	40.3194	0	99.8004	0	100	4	0	0	0		10.53	9.2664	9.2664	9.2664	5.53025	0.0184958	0	8.89574	8.89574	5.30904	0.017756	0		9.2664	100	100	100	BioE_COM-S	40.3194	5.53025	3.73615	40.3194
BE	BE10	Region de Bruxelles-Capitalet	0	12	0	0	0	40.3194	0	99.8004	0	100	0	0	0	0		0	0	0	0	0	0	0	0	0	0	0	0		0	100	100	100		0	0	0	0
BE	BE21	Prov. Antwerpen	0	12	0	0	0	100	0	100	0	100	0	0	0	0		0	0	0	0	0	0	0	0	0	0	0	0		0	100	100	100		0	0	0	0
BE	BE22	Prov. Limburg (B)	0	12	0	0	0	2.92612	0	1.68252	0	0.877835	0	0	0	0		0	0	0	0	0	0	0	0	0	0	0	0		0	100	100	100		0	0	0	0
BE	BE23	Prov. Oost-Vlaanderen	0	12	0	0	0	100	0	100	0	100	0	0	0	0		0	0	0	0	0	0	0	0	0	0	0	0		0	100	100	100		0	0	0	0
BE	BE24	Prov. Vlaams-Brabant	0	12	0	0	0	12.2449	0	12.5	0	17.602	0	0	0	0		0	0	0	0	0	0	0	0	0	0	0	0		0	100	100	100		0	0	0	0
BE	BE25	Prov. West-Vlaanderen	0	12	0	0	0	100	0	100	0	100	0	0	0	0		0	0	0	0	0	0	0	0	0	0	0	0		0	100	100	100		0	0	0	0
BE	BE31	Prov. Brabant Wallon	0	12	0	0	0	100	0	100	0	100	0	0	0	0		0	0	0	0	0	0	0	0	0	0	0	0		0	100	100	100		0	0	0	0
BE	BE32	Prov. Hainaut	0	12	0	0	0	100	0	100	0	100	0	0	0	0		0	0	0	0	0	0	0	0	0	0	0	0		0	100	100	100		0	0	0	0
BE	BE33	Prov. LiÞge	0	12	0	0	0	58.5366	0	58.5366	0	42.6829	0	0	0	0		0	0	0	0	0	0	0	0	0	0	0	0		0	100	100	100		0	0	0	0
BE	BE34	Prov. Luxembourg (B)	0	12	0	0	0	58.5366	0	58.5366	0	42.6829	0	0	0	0		0	0	0	0	0	0	0	0	0	0	0	0		0	100	100	100		0	0	0	0
BE	BE35	Prov. Namur	0	12	0	0	0	100	0	100	0	100	0	0	0	0		0	0	0	0	0	0	0	0	0	0	0	0		0	100	100	100		0	0	0	0
BG	BG31	Severozapaden	0.0997133	12	0	30.303	30.303	100	30.303	100	30.303	100	2.5	0	0	0		5232.79	4600.26	4600.26	3206.25	0	0	0	4485.26	3126.09	0	0	0		4600.26	100	100	100		100	0	4600.26	100
BG	BG32	Severen tsentralen	0	12	0	20.9726	20.9726	97.6111	20.9726	100	20.9726	100	2.5	0	0	0		3474.94	3057.95	3057.95	2416.62	57.7303	0	0	2981.5	2356.2	56.287	0	0		3057.95	97.6111	100	100	BioE_COM-S	97.6111	57.7303	3000.22	98.1121
BG	BG33	Severoiztochen	0	12	0	24.8988	24.8988	99.9785	24.8988	100	24.8988	100	2.5	0	0	0		5191.29	4568.34	4568.34	3430.88	0.736081	0	0	4454.13	3345.1	0.717679	0	0		4568.34	99.9785	100	100	BioE_COM-S	99.9785	0.736081	4567.6	99.9839
BG	BG34	Yugoiztochen	0.185447	12	0	19.0764	19.0764	75.0088	19.0764	97.651	19.0764	99.7704	2.5	0	0	0		19168.4	16836.9	16836.9	13625	3405.05	320.05	31.2831	16416	13284.4	3319.92	312.049	30.501		16836.9	75.0088	97.651	99.7704	BioE_COM-S	75.0088	3405.05	13431.8	79.7763
BG	BG41	Yugozapaden	0.178663	12	0	58.7432	58.7432	77.5651	58.7432	100	58.7432	100	2.5	0	0	0		3855.7	3386.95	3386.95	1397.35	313.494	0	0	3302.28	1362.41	305.657	0	0		3386.95	77.5651	100	100	BioE_COM-S	77.5651	313.494	3073.46	90.7441
BG	BG42	Yuzhen tsentralen	0.12842	12	0	26.9942	26.9942	68.3493	26.9942	89.5979	26.9942	100	2.5	1.79191	2.45447	2.80543		18257.6	16046	16046	11714.5	3707.73	1218.55	0	15364.5	11141.3	3526.31	1158.93	0		16046	68.3493	89.5979	100	BioE_COM-S	68.3493	3707.73	12338.3	76.8932
CY	CY00	Kypros/Kibris	0.827433	12	0	39.6325	39.6325	35.4841	39.6325	64.7864	39.6325	57.3156	10	1.70604	2.3913	3.74332		9061.72	7908.33	7908.33	4774.06	3080.02	1681.12	2037.78	6996.07	4193.9	2705.73	1476.83	1790.14		7908.33	35.4841	64.7864	57.3156	BioE_COM-S	35.4841	3080.02	4828.3	61.0534
CZ	CZ01	Praha	0	12	0	0	0	100	0	100	0	100	0	0	0	0		0	0	0	0	0	0	0	0	0	0	0	0		0	100	100	100		0	0	0	0
CZ	CZ02	Stredni Cechy	0	12	0	4.16667	4.16667	71.5206	4.16667	100	4.16667	100	0	4.16667	4.34783	4.34783		252.72	222.394	222.394	213.127	60.6973	0	0	213.127	203.861	58.0583	0	0		222.394	71.5206	100	100	BioE_COM-S	71.5206	60.6973	161.696	72.7073
CZ	CZ03	Jihozapad	0	12	0	0	0	45.0207	0	100	0	100	0	0	0	0		0	0	0	0	0	0	0	0	0	0	0	0		0	100	100	100		0	0	0	0
CZ	CZ04	Severozapad	0	12	0	0	0	100	0	100	0	100	0	0	0	0		347.49	305.791	305.791	305.791	0	0	0	305.791	305.791	0	0	0		305.791	100	100	100		100	0	305.791	100
CZ	CZ05	Severovychod	0	12	0	0	0	61.7722	0	100	0	100	0	0	0	0		0	0	0	0	0	0	0	0	0	0	0	0		0	100	100	100		0	0	0	0
CZ	CZ06	Jihovychod	0	12	0	6.73077	6.73077	92.2699	6.73077	100	6.73077	100	0	4.88166	5.23394	5.38267		14215.5	12509.6	12509.6	11667.6	901.926	0	0	11899	11057	854.72	0	0		12509.6	92.2699	100	100	BioE_COM-S	92.2699	901.926	11607.7	92.7902
CZ	CZ07	Stredni Morava	0	12	0	8	8	100	8	100	8	100	0	0	0	0		242.19	213.127	213.127	196.077	0	0	0	213.127	196.077	0	0	0		213.127	100	100	100		100	0	213.127	100
CZ	CZ08	Moravskoslezsko	0	12	0	0	0	100	0	100	0	100	0	0	0	0		0	0	0	0	0	0	0	0	0	0	0	0		0	100	100	100		0	0	0	0
DE	DE11	Stuttgart	0	12	0	12.1199	12.1199	70.0523	12.1199	100	12.1199	100	4	3.16723	3.41182	3.48315		10740.6	9451.73	9451.73	8306.18	2487.51	0	0	8786.28	7701.88	2306.54	0	0		9451.73	70.0523	100	100	BioE_COM-S	70.0523	2487.51	6964.22	73.6819
DE	DE12	Karlsruhe	0	12	0	12.12	12.12	90.8028	12.12	97.6928	12.12	93.11	4	0	3.41	3.48		2190.24	1927.41	1927.41	1693.81	155.783	39.0797	116.704	1850.31	1570.61	144.452	36.2372	108.215		1927.41	90.8028	97.6928	93.11	BioE_COM-S	90.8028	155.783	1771.63	91.9175
DE	DE13	Freiburg	0	12	0	12.12	12.12	14.2318	12.12	43.3704	12.12	46.7447	4	0	3.41	3.48		11456.6	10081.8	10081.8	8859.92	7598.99	5017.34	4718.38	9678.57	8215.49	7046.27	4652.4	4375.18		10081.8	14.2318	43.3704	46.7447	BioE_COM-S	14.2318	7598.99	2482.85	24.6269
DE	DE14	Tübingen	0	12	0	12.12	12.12	33.8741	12.12	84.0363	12.12	95.7495	4	0	3.41	3.48		547.56	481.853	481.853	423.452	280.012	67.5985	17.9988	462.579	392.652	259.645	62.6816	16.6896		481.853	33.8741	84.0363	95.7495	BioE_COM-S	33.8741	280.012	201.841	41.8886
DE	DE21	Oberbayern	0	12	0	8.83978	8.83978	100	8.83978	100	8.83978	100	4	4.97238	5.25253	5.3012		0	0	0	0	0	0	0	0	0	0	0	0		0	100	100	100		0	0	0	0
DE	DE22	Niederbayern	0	12	0	8.84	8.84	100	8.84	100	8.84	100	4	0	5.25	5.3		0	0	0	0	0	0	0	0	0	0	0	0		0	100	100	100		0	0	0	0
DE	DE23	Oberpfalz	0	12	0	8.84	8.84	100	8.84	100	8.84	100	4	0	5.25	5.3		0	0	0	0	0	0	0	0	0	0	0	0		0	100	100	100		0	0	0	0
DE	DE24	Oberfranken	0	12	0	8.84	8.84	14.876	8.84	100	8.84	100	4	0	5.25	5.3		10.53	9.2664	9.2664	8.44725	7.19063	0	0	8.89574	7.68362	6.5406	0	0		9.2664	14.876	100	100	BioE_COM-S	14.876	7.19063	2.07577	22.401
DE	DE25	Mittelfranken	0	12	0	8.84	8.84	100	8.84	100	8.84	100	4	0	5.25	5.3		284.31	250.193	250.193	228.076	0	0	0	240.185	207.458	0	0	0		250.193	100	100	100		100	0	250.193	100
DE	DE26	Unterfranken	0	12	0	8.84	8.84	62.2305	8.84	100	8.84	100	4	0	5.25	5.3		5370.3	4725.86	4725.86	4308.1	1627.15	0	0	4536.83	3918.65	1480.05	0	0		4725.86	62.2305	100	100	BioE_COM-S	62.2305	1627.15	3098.72	65.5693
DE	DE27	Schwaben	0	12	0	8.84	8.84	0	8.84	36.5297	8.84	100	4	0	5.25	5.3		31.59	27.7992	27.7992	25.3418	25.3418	16.0845	0	26.6872	23.0509	23.0509	14.6305	0		27.7992	0	36.5297	100	BioE_COM-S	0	25.3418	2.45745	8.84
DE	DE30	Berlin	0	12	0	0	0	0	0	36.5297	0	100	4	0	0	0		0	0	0	0	0	0	0	0	0	0	0	0		0	100	100	100		0	0	0	0
DE	DE40	Brandenburg	0	12	0	0	0	32.6327	0	85.3982	0	100	4	0	0	0		21.06	18.5328	18.5328	18.5328	12.485	2.70612	0	17.7915	17.7915	11.9856	2.59787	0		18.5328	100	100	100	BioE_COM-S	32.6327	12.485	6.04776	32.6327
DE	DE50	Bremen	0	12	0	0	0	32.6327	0	85.3982	0	100	4	0	0	0		0	0	0	0	0	0	0	0	0	0	0	0		0	100	100	100		0	0	0	0
DE	DE60	Hamburg	0	12	0	0	0	0	0	17.0029	0	3.45821	4	0	0	0		0	0	0	0	0	0	0	0	0	0	0	0		0	100	100	100		0	0	0	0
DE	DE71	Darmstadt	0	12	0	4.38596	4.38596	60.9778	4.38596	59.8222	4.38596	57.3333	4	3.80117	3.97554	4.45205		3601.26	3169.11	3169.11	3030.11	1182.42	1217.43	1292.85	2926.7	2793.26	1089.99	1122.27	1191.79		3169.11	60.9778	59.8222	57.3333	BioE_COM-L	57.3333	1292.85	1876.26	59.2047
DE	DE72	Gießen	0	12	0	4.39	4.39	100	4.39	100	4.39	100	4	0	3.98	4.45		0	0	0	0	0	0	0	0	0	0	0	0		0	100	100	100		0	0	0	0
DE	DE73	Kassel	0	12	0	4.39	4.39	100	4.39	100	4.39	100	4	0	3.98	4.45		0	0	0	0	0	0	0	0	0	0	0	0		0	100	100	100		0	0	0	0
DE	DE80	Mecklenburg-Vorpommern	0	12	0	0	0	78.1193	0	100	0	100	4	0	0	0		0	0	0	0	0	0	0	0	0	0	0	0		0	100	100	100		0	0	0	0
DE	DE91	Braunschweig	0	12	0	0	0	78.1193	0	100	0	100	4	0	0	0		0	0	0	0	0	0	0	0	0	0	0	0		0	100	100	100		0	0	0	0
DE	DE92	Hannover	0	12	0	0	0	78.1193	0	100	0	100	4	0	0	0		0	0	0	0	0	0	0	0	0	0	0	0		0	100	100	100		0	0	0	0
DE	DE93	Lüneburg	0	12	0	0	0	8.22245	0	10.8837	0	9.38246	4	0	0	0		0	0	0	0	0	0	0	0	0	0	0	0		0	100	100	100		0	0	0	0
DE	DE94	Weser-Ems	0	12	0	0	0	8.22245	0	10.8837	0	9.38246	4	0	0	0		0	0	0	0	0	0	0	0	0	0	0	0		0	100	100	100		0	0	0	0
DE	DEA1	Düsseldorf	0	12	0	0	0	100	0	100	0	100	4	0	0	0		0	0	0	0	0	0	0	0	0	0	0	0		0	100	100	100		0	0	0	0
DE	DEA2	Köln	0	12	0	0	0	11.2224	0	14.4289	0	100	4	0	0	0		21.06	18.5328	18.5328	18.5328	16.453	15.8587	0	17.7915	17.7915	15.7948	15.2244	0		18.5328	100	100	100	BioE_COM-S	11.2224	16.453	2.07983	11.2224
DE	DEA3	Münster	0	12	0	0	0	11.2224	0	14.4289	0	100	4	0	0	0		0	0	0	0	0	0	0	0	0	0	0	0		0	100	100	100		0	0	0	0
DE	DEA4	Detmold	0	12	0	0	0	11.2224	0	14.4289	0	100	4	0	0	0		0	0	0	0	0	0	0	0	0	0	0	0		0	100	100	100		0	0	0	0
DE	DEA5	Arnsberg	0	12	0	0	0	11.2224	0	14.4289	0	100	4	0	0	0		0	0	0	0	0	0	0	0	0	0	0	0		0	100	100	100		0	0	0	0
DE	DEB1	Koblenz	0	12	0	4.37	4.37	92.1376	4.37	94.226	4.37	98.8943	4	0	5.41	0		7328.88	6449.41	6449.41	6167.57	484.92	356.113	68.1919	6191.44	5600.55	440.338	323.373	61.9226		6449.41	92.1376	94.226	98.8943	BioE_COM-S	92.1376	484.92	5964.49	92.4812
DE	DEB2	Trier	0	12	0	4.37	4.37	100	4.37	100	4.37	100	4	0	5.41	0		7213.05	6347.48	6347.48	6070.1	0	0	0	6093.58	5512.04	0	0	0		6347.48	100	100	100		100	0	6347.48	100
DE	DEB3	Rheinhessen-Pfalz	0	12	0	4.37253	4.37253	3.80239	4.37253	5.62862	4.37253	2.35775	4	5.24073	5.41433	5.80382		52165.6	45905.7	45905.7	43898.5	42229.3	41427.6	42863.5	41760	39860.8	38345.2	37617.2	38921		45905.7	3.80239	5.62862	2.35775	BioE_COM-L	2.35775	42863.5	3042.26	6.62719
DE	DEC0	Saarland	0	12	0	0	0	100	0	100	0	100	4	0	0	0		94.77	83.3976	83.3976	83.3976	0	0	0	80.0617	80.0617	0	0	0		83.3976	100	100	100		100	0	83.3976	100
DE	DED2	Dresden	0	12	0	8.82353	8.82353	23.6559	8.82353	23.8351	8.82353	100	4	0	0	0		358.02	315.058	315.058	287.258	219.305	218.79	0	302.455	275.768	210.533	210.038	0		315.058	23.6559	23.8351	100	BioE_COM-S	23.6559	219.305	95.7528	30.3922
DE	DED4	Chemnitz	0	12	0	8.82	8.82	72.5664	8.82	100	8.82	100	4	0	0	0		0	0	0	0	0	0	0	0	0	0	0	0		0	72.5664	100	100		0	0	0	0
DE	DED5	Leipzig	0	12	0	8.82	8.82	36.4662	8.82	100	8.82	100	4	0	0	0		0	0	0	0	0	0	0	0	0	0	0	0		0	36.4662	100	100		0	0	0	0
DE	DEE0	Sachsen-Anhalt	0	12	0	5.35714	5.35714	84.9143	5.35714	100	5.35714	100	4	0	0	0		589.68	518.918	518.918	491.119	74.0888	0	0	498.162	471.474	71.1253	0	0		518.918	84.9143	100	100	BioE_COM-S	84.9143	74.0888	444.83	85.7224
DE	DEF0	Schleswig-Holstein	0	12	0	0	0	24.6154	0	24.6154	0	24.6154	4	0	0	0		0	0	0	0	0	0	0	0	0	0	0	0		0	100	100	100		0	0	0	0
DE	DEG0	Thüringen	0	12	0	0	0	45.6897	0	100	0	100	4	0	0	0		94.77	83.3976	83.3976	83.3976	45.2935	0	0	80.0617	80.0617	43.4818	0	0		83.3976	100	100	100	BioE_COM-S	45.6897	45.2935	38.1041	45.6897
DK	DK01	Hovedstaden	0	12	0	0	0	100	0	100	0	100	0	0	0	0		0	0	0	0	0	0	0	0	0	0	0	0		0	100	100	100		0	0	0	0
DK	DK02	Sjaelland	0	12	0	0	0	42	0	100	0	100	0	0	0	0		0	0	0	0	0	0	0	0	0	0	0	0		0	100	100	100		0	0	0	0
DK	DK03	Syddanmark	0	12	0	0	0	100	0	100	0	100	0	0	0	0		0	0	0	0	0	0	0	0	0	0	0	0		0	100	100	100		0	0	0	0
DK	DK04	Midtjylland	0	12	0	0	0	100	0	100	0	100	0	0	0	0		0	0	0	0	0	0	0	0	0	0	0	0		0	100	100	100		0	0	0	0
DK	DK05	Nordjylland	0	12	0	0	0	100	0	100	0	100	0	0	0	0		0	0	0	0	0	0	0	0	0	0	0	0		0	100	100	100		0	0	0	0
EE	EE00	Eesti	0	12	0	0	0	100	0	100	0	100	0	0	0	0		0	0	0	0	0	0	0	0	0	0	0	0		0	100	100	100		0	0	0	0
EL	EL30	Attiki	0	12	0	29.2339	29.2339	100	29.2339	100	29.2339	100	10	2.82258	3.7037	6.32184		5518.53	4856.31	4856.31	3436.62	0	0	0	4247.31	2978.41	0	0	0		4856.31	100	100	100		100	0	4856.31	100
EL	EL41	Voreio Aigaio	0	12	0	33.617	33.617	100	33.617	100	33.617	100	10	8.08511	10.2564	13.1579		3262.25	2870.78	2870.78	1905.71	0	0	0	2374.81	1539.23	0	0	0		2870.78	100	100	100		100	0	2870.78	100
EL	EL42	Notio Aigaio	0	12	0	28.479	28.479	100	28.479	100	28.479	100	10	0.970874	1.35747	2.5		3536.7	3112.3	3112.3	2225.95	0	0	0	2773.87	1976.16	0	0	0		3112.3	100	100	100		100	0	3112.3	100
EL	EL43	Kriti	0	12	0	19.3963	19.3963	100	19.3963	100	19.3963	100	10	2.24791	2.70916	4.8414		20811	18313.7	18313.7	14761.5	0	0	0	16111.8	12925.4	0	0	0		18313.7	100	100	100		100	0	18313.7	100
EL	EL51	Anatoliki Makedonia, Thraki	0	12	0	14.1119	14.1119	100	14.1119	100	14.1119	100	10	5.83942	6.51558	9.09091		4646.94	4089.31	4089.31	3512.23	0	0	0	3465.47	2955.05	0	0	0		4089.31	100	100	100		100	0	4089.31	100
EL	EL52	Kentriki Makedonia	0	12	0	15.8491	15.8491	0	15.8491	0	15.8491	0	10	14.717	17.0404	22.327		6487.46	5708.96	5708.96	4804.15	4804.15	4804.15	4804.15	4381.9	3586.95	3586.95	3586.95	3586.95		5708.96	0	0	0	BioE_COM-S & BioE_COM-M & BioE_COM-L	0	4804.15	904.817	15.8491
EL	EL53	Dytiki Makedonia	0	12	0	29.2793	29.2793	0	29.2793	0	29.2793	0	10	3.15315	4.4586	5.60748		2357.72	2074.79	2074.79	1467.31	1467.31	1467.31	1467.31	1808.43	1261.7	1261.7	1261.7	1261.7		2074.79	0	0	0	BioE_COM-S & BioE_COM-M & BioE_COM-L	0	1467.31	607.484	29.2793
EL	EL54	Ipeiros	0	12	0	57.971	57.971	0	57.971	0	57.971	0	10	4.34783	6.89655	14.2857		824.206	725.302	725.302	304.837	304.837	304.837	304.837	624.39	255.432	255.432	255.432	255.432		725.302	0	0	0	BioE_COM-S & BioE_COM-M & BioE_COM-L	0	304.837	420.465	57.971
EL	EL61	Thessalia	0	12	0	18.3771	18.3771	0	18.3771	0	18.3771	0	10	5.48926	6.43275	8.61244		6183.71	5441.67	5441.67	4441.65	4441.65	4441.65	4441.65	4628.66	3740.33	3740.33	3740.33	3740.33		5441.67	0	0	0	BioE_COM-S & BioE_COM-M & BioE_COM-L	0	4441.65	1000.02	18.3771
EL	EL62	Ionia Nisia	0	12	0	30.9456	30.9456	0	30.9456	0	30.9456	0	10	1.43266	2.07469	3.09278		4384.85	3858.67	3858.67	2664.58	2664.58	2664.58	2664.58	3423.05	2348.37	2348.37	2348.37	2348.37		3858.67	0	0	0	BioE_COM-S & BioE_COM-M & BioE_COM-L	0	2664.58	1194.09	30.9456
EL	EL63	Dytiki Ellada	0	12	0	11.4669	11.4669	0	11.4669	0	11.4669	0	10	2.53165	2.77544	3.31412		16230.4	14282.8	14282.8	12645	12645	12645	12645	12529.1	11064.6	11064.6	11064.6	11064.6		14282.8	0	0	0	BioE_COM-S & BioE_COM-M & BioE_COM-L	0	12645	1637.79	11.4669
EL	EL64	Sterea Ellada	0	12	0	14.587	14.587	0	14.587	0	14.587	0	10	4.92091	5.76132	6.92521		6649.48	5851.54	5851.54	4997.97	4997.97	4997.97	4997.97	5007.23	4239.02	4239.02	4239.02	4239.02		5851.54	0	0	0	BioE_COM-S & BioE_COM-M & BioE_COM-L	0	4997.97	853.564	14.587
EL	EL65	Peloponnisos	0	12	0	8.70998	8.70998	0	8.70998	0	8.70998	0	10	4.33145	4.64157	6.29426		26081.6	22951.8	22951.8	20952.7	20952.7	20952.7	20952.7	19761.9	17982.1	17982.1	17982.1	17982.1		22951.8	0	0	0	BioE_COM-S & BioE_COM-M & BioE_COM-L	0	20952.7	1999.09	8.70998
ES	ES11	Galicia	1.20846	12	0	29.9145	29.9145	29.3051	29.9145	51.5861	29.9145	99.7734	2	1.06838	1.37195	1.54525		10661.6	9268.79	9268.79	6496.07	4592.39	3145	14.7192	8986.37	6278.81	4438.8	3039.82	14.2269		9268.79	29.3051	51.5861	99.7734	BioE_COM-S	29.3051	4592.39	4676.4	50.4532
ES	ES12	Principado de Asturias	0	12	0	25	25	56.25	25	100	25	100	2	0	0	0		43.1274	37.9521	37.9521	28.4641	12.453	0	0	37.1931	27.8948	12.204	0	0		37.9521	56.25	100	100	BioE_COM-S	56.25	12.453	25.4991	67.1875
ES	ES13	Cantabria	0	12	0	0	0	56.25	0	100	0	100	2	0	0	0		22.4102	19.721	19.721	19.721	8.62794	0	0	19.3266	19.3266	8.45538	0	0		19.721	100	100	100	BioE_COM-S	56.25	8.62794	11.0931	56.25
ES	ES21	País Vasco	0	12	0	1.37552	1.37552	0.247001	1.37552	0	1.37552	0	2	0.550206	0.55788	0.52356		15560.9	13693.6	13693.6	13505.2	13471.9	13505.2	13505.2	13345.9	13161.3	13128.8	13161.3	13161.3		13693.6	0.247001	0	0	BioE_COM-M & BioE_COM-L	0	13505.2	188.357	1.37552
ES	ES22	Comunidad Foral de Navarra	0.0254453	12	0	1.37702	1.37702	20.9924	1.37702	45.1908	1.37702	37.659	2	4.79582	4.86278	5.15569		22471.4	19769.8	19769.8	19497.5	15404.5	10686.4	12154.9	18445.2	18178.4	14362.3	9963.44	11332.6		19769.8	20.9924	45.1908	37.659	BioE_COM-S	20.9924	15404.5	4365.23	22.0803
ES	ES23	La Rioja	0.00898715	12	0	2.33061	2.33061	4.09814	2.33061	10.1735	2.33061	3.92738	2	0.576646	0.590406	0.646378		43970.3	38690.4	38690.4	37788.6	36240	33944.2	36304.5	37697.9	36814.2	35305.5	33069	35368.4		38690.4	4.09814	10.1735	3.92738	BioE_COM-L	3.92738	36304.5	2385.83	6.16646
ES	ES24	Arag¾n	0.0102912	12	0	1.78472	1.78472	13.0596	1.78472	28.9132	1.78472	30.0864	2	1.70106	1.73197	1.85749		39762.5	34987.4	34987.4	34363	29875.3	24427.5	24024.4	33704.4	33092.5	28770.7	23524.4	23136.1		34987.4	13.0596	28.9132	30.0864	BioE_COM-S	13.0596	29875.3	5112.09	14.6112
ES	ES30	Comunidad de Madrid	0	12	0	4.93506	4.93506	46.3636	4.93506	59.8701	4.93506	40.4416	2	3.11688	3.27869	3.87722		7526.43	6623.26	6623.26	6296.4	3377.16	2526.74	3750.04	6288.48	5968.16	3201.1	2395.01	3554.54		6623.26	46.3636	59.8701	40.4416	BioE_COM-L	40.4416	3750.04	2873.22	43.3808
ES	ES41	Castilla y Le¾n	0.22495	12	0	4.1965	4.1965	46.4876	4.1965	74.4199	4.1965	87.917	2	2.14797	2.2213	2.32454		53014.6	46547.9	46547.9	44594.5	23863.6	11407.3	5388.37	44637.1	42731.8	22866.8	10930.8	5163.3		46547.9	46.4876	74.4199	87.917	BioE_COM-S	46.4876	23863.6	22684.3	48.7332
ES	ES42	Castilla-La Mancha	0.0302138	12	0	1.19896	1.19896	20.4799	1.19896	38.1331	1.19896	24.2692	2	5.78294	5.8458	6.17908		447405	393598	393598	388879	309237	240587	294501	363419	358823	285336	221992	271739		393598	20.4799	38.1331	24.2692	BioE_COM-S	20.4799	309237	84361	21.4333
ES	ES43	Extremadura	0.692464	12	0	0.948008	0.948008	10.6947	0.948008	25.1776	0.948008	16.9224	2	1.83676	1.85434	1.90727		77156.6	67427.7	67427.7	66788.5	59645.6	49972.7	55486.3	64865.4	64239	57368.8	48065.1	53368.2		67427.7	10.6947	25.1776	16.9224	BioE_COM-S	10.6947	59645.6	7782.06	11.5413
ES	ES51	Cataluña	0.328135	12	0	1.58006	1.58006	4.75202	1.58006	9.15614	1.58006	5.1276	2	5.66868	5.72658	5.97227		69014.7	60533.6	60533.6	59577.2	56746	54122.2	56522.3	55960.1	55042.1	52426.5	50002.4	52219.8		60533.6	4.75202	9.15614	5.1276	BioE_COM-S	4.75202	56746	3787.59	6.257
ES	ES52	Comunidad Valenciana	0.155739	12	0	2.63326	2.63326	52.3175	2.63326	69.1924	2.63326	58.2584	2	6.92627	7.0972	7.76505		71883.8	63159.3	63159.3	61496.1	29322.9	18945.5	25669.5	57609	55989	26696.9	17248.8	23370.7		63159.3	52.3175	69.1924	58.2584	BioE_COM-S	52.3175	29322.9	33836.4	53.5731
ES	ES53	Illes Balears	0.822888	12	0	5.03597	5.03597	11.4892	5.03597	19.9715	5.03597	16.7459	2	12.2302	12.8788	13.7931		1615.44	1409.89	1409.89	1338.89	1185.06	1071.49	1114.68	1212.71	1143.13	1011.79	914.827	951.699		1409.89	11.4892	19.9715	16.7459	BioE_COM-S	11.4892	1185.06	224.829	15.9466
ES	ES61	Andalucía	0.695187	12	0	7.37643	7.37643	9.26462	7.37643	14.7899	7.37643	10.4232	2	2.35741	2.50411	2.87154		29908.3	26136.3	26136.3	24208.4	21965.6	20628	21685.1	25009.8	23130.2	20987.2	19709.2	20719.3		26136.3	9.26462	14.7899	10.4232	BioE_COM-S	9.26462	21965.6	4170.74	15.9577
ES	ES62	Regi¾n de Murcia	0.0569653	12	0	1.02874	1.02874	33.8607	1.02874	71.5873	1.02874	37.4987	2	25.8094	26.0777	26.9304		44829.4	39427.4	39427.4	39021.8	25808.8	11087.2	24389.1	28666.4	28268.9	18696.9	8031.98	17668.4		39427.4	33.8607	71.5873	37.4987	BioE_COM-S	33.8607	25808.8	13618.7	34.5411
ES	ES63	Ciudad Autónoma de Ceuta	0.0569653	12	0	0	0	33.8607	0	71.5873	0	37.4987	2	0	0	0		0	0	0	0	0	0	0	0	0	0	0	0		0	100	100	100		0	0	0	0
ES	ES64	Ciudad Autónoma de Melilla	0.0569653	12	0	0	0	33.8607	0	71.5873	0	37.4987	2	0	0	0		0	0	0	0	0	0	0	0	0	0	0	0		0	100	100	100		0	0	0	0
ES	ES70	Canarias	17.6986	12	0	21.875	21.875	39.76	21.875	84.4351	21.875	92.1318	2	5.58036	6.28571	7.69231		5608.38	4061.88	4061.88	3173.34	1911.62	493.927	249.684	3758.51	2914.4	1755.64	453.622	229.31		4061.88	39.76	84.4351	92.1318	BioE_COM-S	39.76	1911.62	2150.26	52.9375
FI	FI19	Lõnsi-Suomi	17.6986	12	0	0	0	39.76	0	84.4351	0	92.1318	0	0	0	0		0	0	0	0	0	0	0	0	0	0	0	0		0	100	100	100		0	0	0	0
FI	FI1B	Helsinki-Uusimaa	17.6986	12	0	0	0	39.76	0	84.4351	0	92.1318	0	0	0	0		0	0	0	0	0	0	0	0	0	0	0	0		0	100	100	100		0	0	0	0
FI	FI1C	Etelõ-Suomi	17.6986	12	0	0	0	39.76	0	84.4351	0	92.1318	0	0	0	0		0	0	0	0	0	0	0	0	0	0	0	0		0	100	100	100		0	0	0	0
FI	FI1D	Pohjois- ja Suomi	17.6986	12	0	0	0	39.76	0	84.4351	0	92.1318	0	0	0	0		0	0	0	0	0	0	0	0	0	0	0	0		0	100	100	100		0	0	0	0
FI	FI20	┼land	17.6986	12	0	0	0	39.76	0	84.4351	0	92.1318	0	0	0	0		0	0	0	0	0	0	0	0	0	0	0	0		0	100	100	100		0	0	0	0
FR	FR10	Ille-de-France	0	12	0	0	0	100	0	100	0	100	10.5	0	0	0		21.06	18.5328	18.5328	18.5328	0	0	0	16.5869	16.5869	0	0	0		18.5328	100	100	100		100	0	18.5328	100
FR	FR21	Champagne-Ardenne	0	12	0	14.786	14.786	26.8608	14.786	51.2204	14.786	56.6941	10.5	0.843061	0.951294	1.07124		32485	28586.8	28586.8	24360	17816.7	11882.7	10549.3	25369.5	21594.8	15794.3	10533.9	9351.83		28586.8	26.8608	51.2204	56.6941	BioE_COM-S	26.8608	17816.7	10770.1	37.6752
FR	FR22	Picardie	0	12	0	9.30233	9.30233	68.9829	9.30233	100	9.30233	100	10.5	0.775194	0.854701	1.23457		2706.21	2381.46	2381.46	2159.93	669.949	0	0	2114.89	1916.62	594.48	0	0		2381.46	68.9829	100	100	BioE_COM-S	68.9829	669.949	1711.52	71.8682
FR	FR23	Haute-Normandie	0	12	0	0	0	100	0	100	0	100	10.5	0	0	0		0	0	0	0	0	0	0	0	0	0	0	0		0	100	100	100		0	0	0	0
FR	FR24	Centre	0	12	0	1.28854	1.28854	37.2515	1.28854	92.6722	1.28854	89.9561	10.5	7.82329	7.92541	7.90476		22881.7	20135.9	20135.9	19876.4	12472.2	1456.5	1996.37	16611.7	16379.5	10277.9	1200.26	1645.15		20135.9	37.2515	92.6722	89.9561	BioE_COM-S	37.2515	12472.2	7663.73	38.06
FR	FR25	Basse-Normandie	0	12	0	0	0	35.6522	0	100	0	100	10.5	0	0	0		0	0	0	0	0	0	0	0	0	0	0	0		0	100	100	100		0	0	0	0
FR	FR26	Bourgogne	0	12	0	2.03562	2.03562	7.2456	2.03562	33.2978	2.03562	48.082	10.5	6.67939	6.72078	6.74235		33106.3	29133.6	29133.6	28540.5	26472.6	19037.1	14817.6	24332.9	23827	22100.6	15893.1	12370.5		29133.6	7.2456	33.2978	48.082	BioE_COM-S	7.2456	26472.6	2660.98	9.13373
FR	FR30	Nord - Pas-de-Calais	0	12	0	0	0	100	0	100	0	100	10.5	0	0	0		0	0	0	0	0	0	0	0	0	0	0	0		0	100	100	100		0	0	0	0
FR	FR41	Lorraine	0	12	0	8.69565	8.69565	100	8.69565	100	8.69565	100	10.5	17.3913	19.0476	23.5294		231.66	203.861	203.861	186.134	0	0	0	150.724	134.858	0	0	0		203.861	100	100	100		100	0	203.861	100
FR	FR42	Alsace	0	12	0	7.00876	7.00876	31.685	7.00876	44.8174	7.00876	62.8132	10.5	10.5131	11.1709	11.8392		16826.9	14807.7	14807.7	13769.9	9406.89	7598.57	5120.58	11859.6	10947.3	7478.67	6041.02	4070.96		14807.7	31.685	44.8174	62.8132	BioE_COM-S	31.685	9406.89	5400.81	36.473
FR	FR43	Franche-ComtÚ	0	12	0	8.03571	8.03571	74.5474	8.03571	100	8.03571	100	10.5	12.0536	13.1068	12.5		2358.72	2075.67	2075.67	1908.88	485.859	0	0	1633.81	1484.52	377.85	0	0		2075.67	74.5474	100	100	BioE_COM-S	74.5474	485.859	1589.81	76.5927
FR	FR51	Pays de la Loire	0	12	0	0.47726	0.47726	30.0082	0.47726	49.624	0.47726	43.8344	10.5	4.04267	4.03385	3.95448		37507.9	33006.9	33006.9	32849.4	22991.9	16548.2	18450.1	28346.9	28214.2	19747.7	14213.2	15846.7		33006.9	30.0082	49.624	43.8344	BioE_COM-S	30.0082	22991.9	10015	30.3422
FR	FR52	Bretagne	0	12	0	0	0	0	0	100	0	100	10.5	0	0	0		0	0	0	0	0	0	0	0	0	0	0	0		0	100	100	100		0	0	0	0
FR	FR53	Poitou-Charentes	0.0360008	12	0	0.438757	0.438757	14.3335	0.438757	23.7657	0.438757	12.7546	10.5	1.02377	1.02828	1.03397		86504.6	76096.6	76096.6	75762.7	64903.3	57757.2	66099.5	67409.2	67110.4	57491.1	51161.1	58550.7		76096.6	14.3335	23.7657	12.7546	BioE_COM-L	12.7546	66099.5	9997.09	13.1374
FR	FR61	Aquitaine	0.057869	12	0	0.802232	0.802232	5.62776	0.802232	10.0065	0.802232	6.31736	10.5	4.77851	4.80309	4.81487		154700	136057	136057	134966	127370	121460	126439	115952	114992	108521	103486	107728		136057	5.62776	10.0065	6.31736	BioE_COM-S	5.62776	127370	8687.04	6.38484
FR	FR62	Midi-PyrÚnÚes	0.117193	12	0	0.577717	0.577717	16.3932	0.577717	35.6128	0.577717	24.0452	10.5	3.93398	3.95683	3.93196		38548.6	33883	33883	33687.2	28164.8	21690.2	25587.1	29132.3	28957.1	24210.1	18644.6	21994.3		33883	16.3932	35.6128	24.0452	BioE_COM-S	16.3932	28164.8	5718.17	16.8762
FR	FR63	Limousin	0	12	0	7.69231	7.69231	40.056	7.69231	76.4706	7.69231	100	10.5	15.3846	16.6667	16.6667		137.173	120.713	120.713	111.427	66.7937	26.2181	0	91.4165	83.1059	49.817	19.5543	0		120.713	40.056	76.4706	100	BioE_COM-S	40.056	66.7937	53.9188	44.6671
FR	FR71	Rh¶ne-Alpes	0.987429	12	0	2.13465	2.13465	15.8903	2.13465	33.888	2.13465	30.2583	10.5	7.24548	7.36158	7.47089		51376.8	44765.1	44765.1	43809.5	36848.1	28963.4	30553.5	37161.9	36323.1	30551.2	24013.9	25332.3		44765.1	15.8903	33.888	30.2583	BioE_COM-S	15.8903	36848.1	7917.04	17.6857
FR	FR72	Auvergne	0	12	0	5.21739	5.21739	100	5.21739	100	5.21739	100	10.5	5.21739	5.50459	5.88235		1210.95	1065.64	1065.64	1010.04	0	0	0	903.984	854.223	0	0	0		1065.64	100	100	100		100	0	1065.64	100
FR	FR81	Languedoc-Roussillon	0.144418	12	0	1.88975	1.88975	4.76581	1.88975	8.86176	1.88975	2.4674	10.5	6.37685	6.49104	6.64932		287844	252937	252937	248157	236331	226166	242034	211943	207684	197786	189280	202560		252937	4.76581	8.86176	2.4674	BioE_COM-L	2.4674	242034	10902.9	4.31053
FR	FR82	Provence-Alpes-C¶te d'Azur	0.250887	12	0	1.69079	1.69079	13.3122	1.69079	28.1424	1.69079	20.2838	10.5	11.0178	11.196	11.4402		102593	90055.3	90055.3	88532.6	76747	63617.4	70574.8	71719.2	70365.3	60998.1	50562.8	56092.5		90055.3	13.3122	28.1424	20.2838	BioE_COM-S	13.3122	76747	13308.3	14.7779
FR	FR83	Corse	0.593575	12	0	0.149925	0.149925	35.5796	0.149925	69.9721	0.149925	100	10.5	7.64618	7.65766	7.71558		7987.63	6987.39	6987.39	6976.91	4494.55	2095.02	0	5775.54	5766.17	3714.59	1731.46	0		6987.39	35.5796	69.9721	100	BioE_COM-S	35.5796	4494.55	2492.83	35.6762
FR	FRA1	Guadeloupe	0.593575	12	0	0	0	35.5796	0	69.9721	0	100	10.5	0	0	0		0	0	0	0	0	0	0	0	0	0	0	0		0	100	100	100		0	0	0	0
FR	FRA2	Martinique	0.593575	12	0	0	0	35.5796	0	69.9721	0	100	10.5	0	0	0		0	0	0	0	0	0	0	0	0	0	0	0		0	100	100	100		0	0	0	0
FR	FRA3	Guyane	0.593575	12	0	0	0	35.5796	0	69.9721	0	100	10.5	0	0	0		0	0	0	0	0	0	0	0	0	0	0	0		0	100	100	100		0	0	0	0
FR	FRA4	RÚunion	0.593575	12	0	0	0	35.5796	0	69.9721	0	100	10.5	0	0	0		33.0374	28.9003	28.9003	28.9003	18.6177	8.67817	0	25.8658	25.8658	16.6628	7.76696	0		28.9003	100	100	100	BioE_COM-S	35.5796	18.6177	10.2826	35.5796
HR	HR03	Jadranska Hrvatska	5.00495	12	0	40.4517	40.4517	52.1563	40.4517	92.087	40.4517	100	30	0.958248	1.6092	2.7833		16928.5	14151.5	14151.5	8426.95	4031.77	666.821	0	9811.1	5803.94	2776.82	459.263	0		14151.5	52.1563	92.087	100	BioE_COM-S	52.1563	4031.77	10119.7	71.5099
HR	HR04	Kontinentalna Hrvatska	0	12	0	25.3181	25.3181	19.6388	25.3181	80.6321	25.3181	100	30	0.636132	0.851789	1.24844		16556	14569.2	14569.2	10880.6	8743.78	2107.35	0	10133.6	7551.54	6068.51	1462.58	0		14569.2	19.6388	80.6321	100	BioE_COM-S	19.6388	8743.78	5825.47	39.9847
HU	HU10	Közép-Magyarország	0	12	0	27.3128	27.3128	53.238	27.3128	99.4603	27.3128	100	4	13.2159	18.1818	20		2380.36	2094.72	2094.72	1522.59	711.995	8.21691	0	1745.17	1195.93	559.24	6.45401	0		2094.72	53.238	99.4603	100	BioE_COM-S	53.238	711.995	1382.72	66.01
HU	HU21	Közép-Dunántúl	0	12	0	33.9572	33.9572	88.6598	33.9572	100	33.9572	100	4	3.34225	5.06073	5.93824		7876.49	6931.31	6931.31	4577.63	519.113	0	0	6431.66	4172.13	473.128	0	0		6931.31	88.6598	100	100	BioE_COM-S	88.6598	519.113	6412.2	92.5106
HU	HU22	Nyugat-Dunántúl	0	12	0	50	50	92.598	50	100	50	100	4	2.29358	4.58716	5.81395		4591.08	4040.15	4040.15	2020.08	149.525	0	0	3789.59	1850.31	136.96	0	0		4040.15	92.598	100	100	BioE_COM-S	92.598	149.525	3890.63	96.299
HU	HU23	Dél-Dunántúl	0	12	0	25.8824	25.8824	70.5856	25.8824	99.9404	25.8824	100	4	1.62896	2.1978	2.45232		11652.8	10254.5	10254.5	7600.38	2235.61	4.5301	0	9683.94	7136.01	2099.01	4.25332	0		10254.5	70.5856	99.9404	100	BioE_COM-S	70.5856	2235.61	8018.88	78.1987
HU	HU31	Észak-Magyarország	0	12	0	27.7085	27.7085	38.3548	27.7085	91.1837	27.7085	99.449	4	1.51018	2.08901	2.58427		16037.2	14112.7	14112.7	10202.3	6289.23	899.465	56.2166	13343.6	9589.61	5911.53	845.448	52.8405		14112.7	38.3548	91.1837	99.449	BioE_COM-S	38.3548	6289.23	7823.5	55.4358
HU	HU32	Észak-Alföld	0	12	0	43.038	43.038	25.7606	43.038	43.2429	43.038	26.1133	4	0	0	0		1663.74	1464.09	1464.09	833.976	619.139	473.34	616.197	1405.53	800.617	594.373	454.407	591.549		1464.09	25.7606	43.2429	26.1133	BioE_COM-S	25.7606	619.139	844.952	57.7117
HU	HU33	Dél-Alföld	0	12	0	11.4317	11.4317	32.1212	11.4317	58.3377	11.4317	43.8182	4	0.943396	1.06516	1.29278		18975.3	16698.3	16698.3	14789.3	10038.8	6161.59	8308.93	15879.1	14046.5	9534.63	5852.12	7891.6		16698.3	32.1212	58.3377	43.8182	BioE_COM-S	32.1212	10038.8	6659.42	39.8809
IE	IE01	Border, Midland and Western	0	12	0	0	0	32.1212	0	58.3377	0	43.8182	0	0	0	0		0	0	0	0	0	0	0	0	0	0	0	0		0	100	100	100		0	0	0	0
IE	IE02	Southern and Eastern	0	12	0	0	0	32.1212	0	58.3377	0	43.8182	0	0	0	0		0	0	0	0	0	0	0	0	0	0	0	0		0	100	100	100		0	0	0	0
IT	ITC1	Piemonte	0.217174	12	0	8.33154	8.33154	5.9224	8.33154	10.6239	8.33154	12.5902	30	2.16878	2.31904	2.48683		51575.6	45288	45288	41514.8	39056.1	37104.3	36288	31014.1	28386.4	26705.3	25370.7	24812.5		45288	5.9224	10.6239	12.5902	BioE_COM-S	5.9224	39056.1	6231.86	13.7605
IT	ITC2	Valle d'Aosta/VallÚe d'Aoste	23.4848	12	0	50	50	100	50	100	50	100	30	0	0	0		484.38	326.149	326.149	163.075	0	0	0	228.304	114.152	0	0	0		326.149	100	100	100		100	0	326.149	100
IT	ITC3	Liguria	5.53111	12	0	44.586	44.586	41.0434	44.586	52.7656	44.586	53.4884	30	3.18471	4.5977	6.25		1732.9	1440.6	1440.6	798.295	470.648	377.07	371.3	976.306	533.114	314.306	251.814	247.96		1440.6	41.0434	52.7656	53.4884	BioE_COM-S	41.0434	470.648	969.954	67.3298
IT	ITC4	Lombardia	4.37391	12	0	7.63589	7.63589	13.4466	7.63589	26.0685	7.63589	21.3697	30	3.9258	4.11023	4.31732		28634.1	24095.9	24095.9	22255.9	19263.3	16454.2	17499.9	16204.9	14938.8	12930.1	11044.5	11746.4		24095.9	13.4466	26.0685	21.3697	BioE_COM-S	13.4466	19263.3	4832.61	20.0558
IT	ITF1	Abruzzo	1.25987	12	0	10.7692	10.7692	9.26953	10.7692	16.7309	10.7692	11.8154	30	10.2154	11.3793	15.0685		35522.5	30865.9	30865.9	27541.9	24988.9	22933.9	24287.7	19399	17085.5	15501.7	14226.9	15066.8		30865.9	9.26953	16.7309	11.8154	BioE_COM-S	9.26953	24988.9	5877.03	19.0405
IT	ITF2	Molise	0.689655	12	0	8.30116	8.30116	14.063	8.30116	29.5052	8.30116	24.7676	30	6.37066	6.94737	7.99031		5649.33	4937.13	4937.13	4527.29	3890.62	3191.5	3405.99	3235.82	2948.93	2534.23	2078.84	2218.55		4937.13	14.063	29.5052	24.7676	BioE_COM-S	14.063	3890.62	1046.51	21.1967
IT	ITF3	Campania	2.94054	12	0	28.8478	28.8478	11.2469	28.8478	20.448	28.8478	9.85529	30	3.9123	5.31722	8.28604		26300.9	22464.2	22464.2	15983.8	14186.1	12715.4	14408.5	15109.7	10593.7	9402.25	8427.51	9549.67		22464.2	11.2469	20.448	9.85529	BioE_COM-L	9.85529	14408.5	8055.67	35.8601
IT	ITF4	Puglia	0.425932	12	0	11.8574	11.8574	1.94955	11.8574	4.63333	11.8574	3.35229	30	6.4465	7.28196	9.20456		135968	119142	119142	105015	102968	100149	101495	78023.2	68157.5	66828.7	64999.5	65872.7		119142	1.94955	4.63333	3.35229	BioE_COM-S	1.94955	102968	16174.6	13.5758
IT	ITF5	Basilicata	0.460429	12	0	14.4144	14.4144	26.7049	14.4144	42.8096	14.4144	23.6302	30	17.8378	20.4211	24.0106		6087.2	5332.07	5332.07	4563.48	3344.81	2609.87	3485.12	3066.66	2542.1	1863.24	1453.84	1941.4		5332.07	26.7049	42.8096	23.6302	BioE_COM-L	23.6302	3485.12	1846.95	34.6385
IT	ITF6	Calabria	1.16964	12	0	20.8417	20.8417	4.15599	20.8417	7.19301	20.8417	3.77383	30	18.6373	23.2911	29.5082		11079.4	9635.8	9635.8	7627.53	7310.53	7078.89	7339.68	5487.96	4095.7	3925.48	3801.09	3941.13		9635.8	4.15599	7.19301	3.77383	BioE_COM-L	3.77383	7339.68	2296.11	23.829
IT	ITG1	Sicilia	1.77257	12	0	8.64295	8.64295	23.1852	8.64295	36.9344	8.64295	22.2833	30	10.6456	11.6239	14.5869		133810	115665	115665	105668	81168.8	66640.3	82121.9	72346.4	65369.9	50213.7	41225.9	50803.3		115665	23.1852	36.9344	22.2833	BioE_COM-L	22.2833	82121.9	33543.3	29.0003
IT	ITG2	Sardegna	0.271239	12	0	18.6674	18.6674	31.0084	18.6674	60.6219	18.6674	73.283	30	3.49022	4.22627	4.95382		21709.8	19052.8	19052.8	15496.1	10691	6102.08	4140.11	12871.5	10388.9	7167.43	4090.93	2775.59		19052.8	31.0084	60.6219	73.283	BioE_COM-S	31.0084	10691	8361.76	43.8873
IT	ITH1	Provincia Autonoma Bolzano/Bozen	18.7184	12	0	23.6295	23.6295	2.60764	23.6295	5.21528	23.6295	9.82414	30	5.29301	6.68317	11.5		5570.37	3984.36	3984.36	3042.88	2963.53	2884.18	2743.94	2641.43	1987.66	1935.83	1884	1792.39		3984.36	2.60764	5.21528	9.82414	BioE_COM-S	2.60764	2963.53	1020.83	25.621
IT	ITH2	Provincia Autonoma Trento	17.3829	12	0	30.2214	30.2214	15.4273	30.2214	23.0082	30.2214	13.3752	30	2.30991	3.03448	3.64964		11628.4	8454.19	8454.19	5899.22	4989.13	4541.92	5110.19	5781.24	4004.15	3386.41	3082.86	3468.58		8454.19	15.4273	23.0082	13.3752	BioE_COM-L	13.3752	5110.19	3344	39.5544
IT	ITH3	Veneto	2.97166	12	0	10.6156	10.6156	7.03257	10.6156	11.6751	10.6156	9.78215	30	2.04344	2.22861	2.56831		105310	89918.6	89918.6	80373.2	74720.9	70989.5	72511	61656.8	55007.4	51139	48585.2	49626.5		89918.6	7.03257	11.6751	9.78215	BioE_COM-S	7.03257	74720.9	15197.7	16.9016
IT	ITH4	Friuli-Venezia Giulia	0	12	0	3.77651	3.77651	20.5025	3.77651	38.4029	3.77651	48.6765	30	2.48319	2.58065	2.69163		22189.3	19526.6	19526.6	18789.2	14936.9	11573.6	9643.25	13329.2	12813	10186	7892.44	6576.07		19526.6	20.5025	38.4029	48.6765	BioE_COM-S	20.5025	14936.9	4589.67	23.5047
IT	ITH5	Emilia-Romagna	0.0263852	12	0	5.61617	5.61617	17.1768	5.61617	29.1293	5.61617	24.7493	30	4.32838	4.51014	4.69504		66700.8	58681.2	58681.2	55385.6	45872.1	39252.2	41678	39298.9	37021.3	30662.3	26237.3	27858.8		58681.2	17.1768	29.1293	24.7493	BioE_COM-S	17.1768	45872.1	12809.1	21.8283
IT	ITI1	Toscana	0.451054	12	0	4.67056	4.67056	14.3174	4.67056	30.4814	4.67056	21.3088	30	7.83987	8.18898	8.57741		67391.3	59036.8	59036.8	56279.5	48221.7	39124.7	44287	38085.9	36169.5	30991	25144.6	28462.3		59036.8	14.3174	30.4814	21.3088	BioE_COM-S	14.3174	48221.7	10815.1	18.3193
IT	ITI2	Umbria	2.66376	12	0	7.6	7.6	22.0524	7.6	65.6914	7.6	53.0713	30	5.2	5.54113	5.93301		13534.7	11593.2	11593.2	10712.2	8349.87	3675.19	5027.07	7693.28	7083.01	5521.04	2430.08	3323.96		11593.2	22.0524	65.6914	53.0713	BioE_COM-S	22.0524	8349.87	3243.38	27.9764
IT	ITI3	Marche	0	12	0	5.16627	5.16627	64.5556	5.16627	88	5.16627	93.2222	30	18.7648	19.6619	20.985		19184.4	16882.2	16882.2	16010.1	5674.67	1921.21	1085.13	9600.02	9003.52	3191.25	1080.42	610.239		16882.2	64.5556	88	93.2222	BioE_COM-S	64.5556	5674.67	11207.6	66.3867
IT	ITI4	Lazio	2.8532	12	0	19.4048	19.4048	13.9902	19.4048	34.8754	19.4048	30.3477	30	8.39286	10.2659	12.8934		19178.7	16395.7	16395.7	13214.2	11365.5	8605.69	9203.99	10513.8	8300.35	7139.11	5405.57	5781.38		16395.7	13.9902	34.8754	30.3477	BioE_COM-S	13.9902	11365.5	5030.25	30.6802
LT	LT00	Lietuva	0	12	0	0	0	42.0103	0	100	0	100	0	0	0	0		0	0	0	0	0	0	0	0	0	0	0	0		0	100	100	100		0	0	0	0
LU	LU00	Luxembourg	0	12	0	7.87402	7.87402	100	7.87402	100	7.87402	100	10.5	0	0	0		1337.31	1176.83	1176.83	1084.17	0	0	0	1053.27	970.331	0	0	0		1176.83	100	100	100		100	0	1176.83	100
LV	LV00	Latvija	0	12	0	0	0	72.3485	0	100	0	100	0	0	0	0		0	0	0	0	0	0	0	0	0	0	0	0		0	100	100	100		0	0	0	0
MT	MT00	Malta	0	12	0	39.3443	39.3443	100	39.3443	100	39.3443	100	30	0	0	0		932.38	820.494	820.494	497.677	0	0	0	574.346	348.374	0	0	0		820.494	100	100	100		100	0	820.494	100
NL	NL11	Groningen	0	12	0	0	0	100	0	100	0	100	7.25	0	0	0		0	0	0	0	0	0	0	0	0	0	0	0		0	100	100	100		0	0	0	0
NL	NL12	Friesland (NL)	0	12	0	0	0	100	0	100	0	100	7.25	0	0	0		0	0	0	0	0	0	0	0	0	0	0	0		0	100	100	100		0	0	0	0
NL	NL13	Drenthe	0	12	0	0	0	100	0	100	0	100	7.25	0	0	0		0	0	0	0	0	0	0	0	0	0	0	0		0	100	100	100		0	0	0	0
NL	NL21	Overijssel	0	12	0	0	0	100	0	100	0	100	7.25	0	0	0		0	0	0	0	0	0	0	0	0	0	0	0		0	100	100	100		0	0	0	0
NL	NL22	Gelderland	0	12	0	0	0	44.7581	0	73.7903	0	100	7.25	0	0	0		21.06	18.5328	18.5328	18.5328	10.2379	4.85739	0	17.1892	17.1892	9.49563	4.50523	0		18.5328	100	100	100	BioE_COM-S	44.7581	10.2379	8.29492	44.7581
NL	NL23	Flevoland	0	12	0	0	0	69.4184	0	100	0	100	7.25	0	0	0		0	0	0	0	0	0	0	0	0	0	0	0		0	100	100	100		0	0	0	0
NL	NL31	Utrecht	0	12	0	0	0	18.9189	0	100	0	100	7.25	0	0	0		0	0	0	0	0	0	0	0	0	0	0	0		0	100	100	100		0	0	0	0
NL	NL32	Noord-Holland	0	12	0	0	0	14.1176	0	100	0	100	7.25	0	0	0		0	0	0	0	0	0	0	0	0	0	0	0		0	100	100	100		0	0	0	0
NL	NL33	Zuid-Holland	0	12	0	0	0	6.25	0	100	0	100	7.25	0	0	0		0	0	0	0	0	0	0	0	0	0	0	0		0	100	100	100		0	0	0	0
NL	NL34	Zeeland	0.37594	12	0	0	0	46.9925	0	100	0	100	7.25	0	0	0		0	0	0	0	0	0	0	0	0	0	0	0		0	100	100	100		0	0	0	0
NL	NL41	Noord-Brabant	0	12	0	0	0	100	0	100	0	100	7.25	0	0	0		0	0	0	0	0	0	0	0	0	0	0	0		0	100	100	100		0	0	0	0
NL	NL42	Limburg (NL)	0	12	0	0	0	7.85714	0	100	0	100	7.25	0	0	0		42.12	37.0656	37.0656	37.0656	34.1533	0	0	34.3783	34.3783	31.6772	0	0		37.0656	100	100	100	BioE_COM-S	7.85714	34.1533	2.9123	7.85714
PL	PL11	Lodzkie	0	12	0	33.3333	33.3333	5.74253	33.3333	8.755	33.3333	18.8515	4	0	0	0		31.59	27.7992	27.7992	18.5328	17.4685	16.9103	15.0391	26.6872	17.7915	16.7698	16.2338	14.4375		27.7992	5.74253	8.755	18.8515	BioE_COM-S	5.74253	17.4685	10.3307	37.1617
PL	PL12	Mazowieckie	0	12	0	0	0	3.35825	0	7.10217	0	6.84704	4	0	0	0		21.06	18.5328	18.5328	18.5328	17.9104	17.2166	17.2639	17.7915	17.7915	17.194	16.5279	16.5733		18.5328	100	100	100	BioE_COM-S	3.35825	17.9104	0.622378	3.35825
PL	PL21	Malopolskie	0	12	0	25	25	17.8306	25	59.4354	25	100	4	0	0	0		21.06	18.5328	18.5328	13.8996	11.4212	5.63832	0	17.7915	13.3436	10.9644	5.41279	0		18.5328	17.8306	59.4354	100	BioE_COM-S	17.8306	11.4212	7.11158	38.373
PL	PL22	Slaskie	0	12	0	0	0	25.9843	0	100	0	100	4	0	0	0		0	0	0	0	0	0	0	0	0	0	0	0		0	100	100	100		0	0	0	0
PL	PL31	Lubelskie	0	12	0	0	0	9.04847	0	17.3788	0	21.6517	4	0	0	0		31.59	27.7992	27.7992	27.7992	25.2838	22.968	21.7802	26.6872	26.6872	24.2724	22.0493	20.909		27.7992	100	100	100	BioE_COM-S	9.04847	25.2838	2.5154	9.04847
PL	PL32	Podkarpackie	0	12	0	33.3333	33.3333	48.7719	33.3333	95.0877	33.3333	91.5789	4	0	0	0		21.06	18.5328	18.5328	12.3552	6.32933	0.606922	1.04044	17.7915	11.861	6.07616	0.582645	0.99882		18.5328	48.7719	95.0877	91.5789	BioE_COM-S	48.7719	6.32933	12.2035	65.848
PL	PL33	Swietokrzyskie	0	12	0	0	0	2.99658	0	6.91353	0	10.4024	4	0	0	0		10.53	9.2664	9.2664	9.2664	8.98873	8.62576	8.30247	8.89574	8.89574	8.62918	8.28073	7.97037		9.2664	100	100	100	BioE_COM-S	2.99658	8.98873	0.277675	2.99658
PL	PL34	Podlaskie	0	12	0	0	0	49.4505	0	100	0	100	4	0	0	0		0	0	0	0	0	0	0	0	0	0	0	0		0	100	100	100		0	0	0	0
PL	PL41	Wielkopolskie	0	12	0	0	0	5.4883	0	24.0517	0	56.0129	4	0	0	0		10.53	9.2664	9.2664	9.2664	8.75783	7.03768	4.07602	8.89574	8.89574	8.40752	6.75617	3.91298		9.2664	100	100	100	BioE_COM-S	5.4883	8.75783	0.508568	5.4883
PL	PL42	Zachodniopomorskie	0.724638	12	0	0	0	9.05797	0	100	0	100	4	0	0	0		0	0	0	0	0	0	0	0	0	0	0	0		0	100	100	100		0	0	0	0
PL	PL43	Lubuskie	0	12	0	0	0	16.6065	0	100	0	100	4	0	0	0		21.06	18.5328	18.5328	18.5328	15.4552	0	0	17.7915	17.7915	14.8369	0	0		18.5328	100	100	100	BioE_COM-S	16.6065	15.4552	3.07765	16.6065
PL	PL51	Dolnoslaskie	0	12	0	0	0	23.0228	0	75.3954	0	100	4	0	0	0		31.59	27.7992	27.7992	27.7992	21.399	6.83987	0	26.6872	26.6872	20.5431	6.56628	0		27.7992	100	100	100	BioE_COM-S	23.0228	21.399	6.40017	23.0228
PL	PL52	Opolskie	0	12	0	0	0	45.9016	0	100	0	100	4	0	0	0		0	0	0	0	0	0	0	0	0	0	0	0		0	100	100	100		0	0	0	0
PL	PL61	Kujawsko-Pomorskie	0	12	0	0	0	43.254	0	100	0	100	4	0	0	0		0	0	0	0	0	0	0	0	0	0	0	0		0	100	100	100		0	0	0	0
PL	PL62	Warminsko-Mazurskie	0	12	0	0	0	0	0	100	0	100	4	0	0	0		84.24	74.1312	74.1312	74.1312	74.1312	0	0	71.166	71.166	71.166	0	0		74.1312	100	100	100	BioE_COM-S	0	74.1312	0	0
PL	PL63	Pomorskie	0	12	0	0	0	26.9565	0	100	0	100	4	0	0	0		0	0	0	0	0	0	0	0	0	0	0	0		0	100	100	100		0	0	0	0
PT	PT11	Norte	0.85056	12	0	16.2915	16.2915	8.43347	16.2915	15.4407	16.2915	7.30937	2	1.22246	1.44592	1.9557		102168	89142.8	89142.8	74620.1	68327	63098.2	69165.8	86292	72070.3	65992.3	60942.1	66802.4		89142.8	8.43347	15.4407	7.30937	BioE_COM-L	7.30937	69165.8	19976.9	22.41
PT	PT15	Algarve	0.325504	12	0	9.28571	9.28571	9.20347	9.28571	23.7171	9.28571	21.5216	2	3.57143	3.93701	4.90196		1811.36	1588.81	1588.81	1441.28	1308.63	1099.45	1131.09	1501.43	1356.84	1231.97	1035.04	1064.83		1588.81	9.20347	23.7171	21.5216	BioE_COM-S	9.20347	1308.63	280.18	17.6346
PT	PT16	Centro (P)	0.11461	12	0	20.3715	20.3715	30.1647	20.3715	56.2411	20.3715	34.862	2	1.58927	1.99585	2.80269		36468.7	32055.7	32055.7	25525.5	17825.8	11169.7	16626.8	30915.3	24515.7	17120.6	10727.8	15969		32055.7	30.1647	56.2411	34.862	BioE_COM-S	30.1647	17825.8	14229.9	44.3912
PT	PT17	Centro (P)	0	12	0	8.21355	8.21355	22.1436	8.21355	41.9172	8.21355	56.7386	2	0	0	0		6693.93	5890.66	5890.66	5406.83	4209.56	3140.43	2339.07	5772.84	5298.69	4125.37	3077.63	2292.29		5890.66	22.1436	41.9172	56.7386	BioE_COM-S	22.1436	4209.56	1681.1	28.5384
PT	PT18	Centro (P)	0	12	0	4.37891	4.37891	22.2425	4.37891	40.866	4.37891	22.3361	2	0.20852	0.218069	0.241546		49095.8	43204.3	43204.3	41312.4	32123.5	24429.7	32084.8	42251.9	40397.9	31412.4	23888.9	31374.6		43204.3	22.2425	40.866	22.3361	BioE_COM-S	22.2425	32123.5	11080.8	25.6475
PT	PT20	RegiÒo Aut¾noma dos Aþores	2.66667	12	0	41.9355	41.9355	100	41.9355	100	41.9355	100	2	0	0	0		1553.31	1330.46	1330.46	772.526	0	0	0	1303.85	757.076	0	0	0		1330.46	100	100	100		100	0	1330.46	100
PT	PT30	RegiÒo Aut¾noma da Madeira	25.1309	12	0	90.2655	90.2655	59.6859	90.2655	100	90.2655	100	2	0.884956	9.09091	33.3333		1722.67	1134.98	1134.98	110.485	44.541	0	0	1102.44	98.4319	39.682	0	0		1134.98	59.6859	100	100	BioE_COM-S	59.6859	44.541	1090.44	96.0756
RO	RO11	Nord-Vest	0	12	0	45.3094	45.3094	64.1074	45.3094	85.414	45.3094	90.073	5	0	0	0		5286.06	4651.73	4651.73	2544.06	913.131	371.076	252.55	4419.15	2416.86	867.474	352.523	239.922		4651.73	64.1074	85.414	90.073	BioE_COM-S	64.1074	913.131	3738.6	80.3701
RO	RO12	Centru	0.0448511	12	0	17.4603	17.4603	92.6444	17.4603	100	17.4603	100	5	0	0	0		5970.51	5251.69	5251.69	4334.73	318.845	0	0	4989.11	4117.99	302.902	0	0		5251.69	92.6444	100	100	BioE_COM-S	92.6444	318.845	4932.85	93.9287
RO	RO21	Nord-Est	0	12	0	40.1354	40.1354	78.7461	40.1354	100	40.1354	100	5	0	0	0		31116.1	27382.2	27382.2	16392.3	3484	0	0	26013.1	15572.6	3309.8	0	0		27382.2	78.7461	100	100	BioE_COM-S	78.7461	3484	23898.2	87.2764
RO	RO22	Sud-Est	0.0149629	12	0	39.4239	39.4239	46.4927	39.4239	75.8828	39.4239	60.9917	5	0	0	0		65075.4	57257.8	57257.8	34684.6	18558.8	8364.94	13529.8	54394.9	32950.3	17630.8	7946.69	12853.3		57257.8	46.4927	75.8828	60.9917	BioE_COM-S	46.4927	18558.8	38699	67.5873
RO	RO31	Sud - Muntenia	0	12	0	59.2924	59.2924	43.8393	59.2924	54.2651	59.2924	43.3466	5	0	0	0		25893.3	22786.1	22786.1	9275.67	5209.28	4242.22	5254.98	21646.8	8811.88	4948.81	4030.11	4992.23		22786.1	43.8393	54.2651	43.3466	BioE_COM-L	43.3466	5254.98	17531.1	76.9377
RO	RO32	Bucuresti - Ilfov	0	12	0	88	88	100	88	100	88	100	5	0	0	0		526.5	463.32	463.32	55.5984	0	0	0	440.154	52.8185	0	0	0		463.32	100	100	100		100	0	463.32	100
RO	RO41	Sud-Vest Oltenia	0.0152151	12	0	43.1537	43.1537	71.3499	43.1537	83.3029	43.1537	79.8339	5	0	0	0		31453.1	27674.5	27674.5	15732	4507.22	2626.78	3172.53	26290.8	14945.4	4281.86	2495.44	3013.9		27674.5	71.3499	83.3029	79.8339	BioE_COM-S	71.3499	4507.22	23167.3	83.7135
RO	RO42	Vest	0.17963	12	0	6.621	6.621	64.9123	6.621	89.306	6.621	93.6171	5	0	0	0		4612.14	4051.39	4051.39	3783.15	1327.42	404.569	241.473	3848.82	3593.99	1261.05	384.34	229.399		4051.39	64.9123	89.306	93.6171	BioE_COM-S	64.9123	1327.42	2723.97	67.2354
SE	SE11	Stockholm	0	12	0	0	0	100	0	100	0	100	0	0	0	0		0	0	0	0	0	0	0	0	0	0	0	0		0	100	100	100		0	0	0	0
SE	SE12	Ostra Mellansverige	0	12	0	0	0	100	0	100	0	100	0	0	0	0		0	0	0	0	0	0	0	0	0	0	0	0		0	100	100	100		0	0	0	0
SE	SE21	SmÕland med oarna	0	12	0	0	0	100	0	100	0	100	0	0	0	0		0	0	0	0	0	0	0	0	0	0	0	0		0	100	100	100		0	0	0	0
SE	SE22	Sydsverige	0.283286	12	0	0	0	46.4589	0	100	0	100	0	0	0	0		0	0	0	0	0	0	0	0	0	0	0	0		0	100	100	100		0	0	0	0
SE	SE23	Võstsverige	0	12	0	0	0	100	0	100	0	100	0	0	0	0		0	0	0	0	0	0	0	0	0	0	0	0		0	100	100	100		0	0	0	0
SE	SE31	Norra Mellansverige	0	12	0	0	0	100	0	100	0	100	0	0	0	0		0	0	0	0	0	0	0	0	0	0	0	0		0	100	100	100		0	0	0	0
SE	SE32	Mellersta Norrland	0	12	0	0	0	100	0	100	0	100	0	0	0	0		0	0	0	0	0	0	0	0	0	0	0	0		0	100	100	100		0	0	0	0
SE	SE33	Ovre Norrland	0	12	0	0	0	100	0	100	0	100	0	0	0	0		0	0	0	0	0	0	0	0	0	0	0	0		0	100	100	100		0	0	0	0
SI	SI03	Vzhodna Slovenija	0.652316	12	0	16.999	16.999	55.3164	16.999	90.0848	16.999	100	17	0.629591	0.632111	0.675676		10035.1	8773.27	8773.27	7281.91	3253.82	722.016	0	7235.97	6005.78	2683.6	595.485	0		8773.27	55.3164	90.0848	100	BioE_COM-S	55.3164	3253.82	5519.45	62.9121
SI	SI04	Zahodna Slovenija	0.694444	12	0	18.7683	18.7683	36.0243	18.7683	57.2917	18.7683	48.2639	17	3.37243	4.15162	5.44041		7360.57	6432.32	6432.32	5225.08	3342.78	2231.54	2703.25	5158.77	4156.77	2659.32	1775.29	2150.55		6432.32	36.0243	57.2917	48.2639	BioE_COM-S	36.0243	3342.78	3089.54	48.0315
SK	SK01	Bratislavsky	0	12	0	2.13523	2.13523	62.6523	2.13523	100	2.13523	100	0	0	0	0		2958.93	2603.86	2603.86	2548.26	951.716	0	0	2603.86	2548.26	951.716	0	0		2603.86	62.6523	100	100	BioE_COM-S	62.6523	951.716	1652.14	63.4498
SK	SK02	Zapadne Slovensko	0	12	0	1.2987	1.2987	94.5463	1.2987	100	1.2987	100	0	0	0	0		6444.36	5671.04	5671.04	5597.39	305.262	0	0	5671.04	5597.39	305.262	0	0		5671.04	94.5463	100	100	BioE_COM-S	94.5463	305.262	5365.77	94.6172
SK	SK03	Stredne Slovensko	0	12	0	1.11111	1.11111	100	1.11111	100	1.11111	100	0	0	0	0		947.7	833.976	833.976	824.71	0	0	0	833.976	824.71	0	0	0		833.976	100	100	100		100	0	833.976	100
SK	SK04	Vychodne Slovensko	0.157853	12	0	1.69492	1.69492	99.7632	1.69492	100	1.69492	100	0	0	0	0		1232.01	1082.46	1082.46	1064.11	2.5196	0	0	1082.46	1064.11	2.5196	0	0		1082.46	99.7632	100	100	BioE_COM-S	99.7632	2.5196	1079.94	99.7672
UK	UKC1	Tees Valley and Durham	0.157853	12	0	0	0	99.7632	0	100	0	100	10.5	0	0	0		0	0	0	0	0	0	0	0	0	0	0	0		0	100	100	100		0	0	0	0
UK	UKC2	Northumberland and Tyne and Wear	0.157853	12	0	0	0	99.7632	0	100	0	100	10.5	0	0	0		0	0	0	0	0	0	0	0	0	0	0	0		0	100	100	100		0	0	0	0
UK	UKD1	Cumbria	0.157853	12	0	0	0	99.7632	0	100	0	100	10.5	0	0	0		0	0	0	0	0	0	0	0	0	0	0	0		0	100	100	100		0	0	0	0
UK	UKD3	Greater Manchester	0.157853	12	0	0	0	99.7632	0	100	0	100	10.5	0	0	0		0	0	0	0	0	0	0	0	0	0	0	0		0	100	100	100		0	0	0	0
UK	UKD4	Lancashire	0.157853	12	0	0	0	99.7632	0	100	0	100	10.5	0	0	0		0	0	0	0	0	0	0	0	0	0	0	0		0	100	100	100		0	0	0	0
UK	UKD6	Cheshire	0.157853	12	0	0	0	99.7632	0	100	0	100	10.5	0	0	0		0	0	0	0	0	0	0	0	0	0	0	0		0	100	100	100		0	0	0	0
UK	UKD7	Merseyside	0.157853	12	0	0	0	99.7632	0	100	0	100	10.5	0	0	0		0	0	0	0	0	0	0	0	0	0	0	0		0	100	100	100		0	0	0	0
UK	UKE1	East Yorkshire and Northern Lincolnshire	0.157853	12	0	0	0	99.7632	0	100	0	100	10.5	0	0	0		0	0	0	0	0	0	0	0	0	0	0	0		0	100	100	100		0	0	0	0
UK	UKE2	North Yorkshire	0.157853	12	0	0	0	99.7632	0	100	0	100	10.5	0	0	0		0	0	0	0	0	0	0	0	0	0	0	0		0	100	100	100		0	0	0	0
UK	UKE3	South Yorkshire	0.157853	12	0	0	0	99.7632	0	100	0	100	10.5	0	0	0		0	0	0	0	0	0	0	0	0	0	0	0		0	100	100	100		0	0	0	0
UK	UKE4	West Yorkshire	0.157853	12	0	0	0	99.7632	0	100	0	100	10.5	0	0	0		0	0	0	0	0	0	0	0	0	0	0	0		0	100	100	100		0	0	0	0
UK	UKF1	Derbyshire and Nottinghamshire	0	12	0	0	0	100	0	100	0	100	10.5	0	0	0		0	0	0	0	0	0	0	0	0	0	0	0		0	100	100	100		0	0	0	0
UK	UKF2	Leicestershire, Rutland and Northamptonshire	0	12	0	0	0	100	0	100	0	100	10.5	0	0	0		0	0	0	0	0	0	0	0	0	0	0	0		0	100	100	100		0	0	0	0
UK	UKF3	Lincolnshire	0	12	0	0	0	100	0	100	0	100	10.5	0	0	0		0	0	0	0	0	0	0	0	0	0	0	0		0	100	100	100		0	0	0	0
UK	UKG1	Herefordshire, Worcestershire and Warwickshire	0	12	0	0	0	100	0	100	0	100	10.5	0	0	0		52.65	46.332	46.332	46.332	0	0	0	41.4671	41.4671	0	0	0		46.332	100	100	100		100	0	46.332	100
UK	UKG2	Shropshire and Staffordshire	0	12	0	0	0	100	0	100	0	100	10.5	0	0	0		21.06	18.5328	18.5328	18.5328	0	0	0	16.5869	16.5869	0	0	0		18.5328	100	100	100		100	0	18.5328	100
UK	UKG3	West Midlands	0	12	0	0	0	100	0	100	0	100	10.5	0	0	0		0	0	0	0	0	0	0	0	0	0	0	0		0	100	100	100		0	0	0	0
UK	UKH1	East Anglia	0	12	0	0	0	100	0	100	0	100	10.5	0	0	0		42.12	37.0656	37.0656	37.0656	0	0	0	33.1737	33.1737	0	0	0		37.0656	100	100	100		100	0	37.0656	100
UK	UKH2	Bedfordshire and Hertfordshire	0	12	0	0	0	100	0	100	0	100	10.5	0	0	0		0	0	0	0	0	0	0	0	0	0	0	0		0	100	100	100		0	0	0	0
UK	UKH3	Essex	0	12	0	0	0	100	0	100	0	100	10.5	0	0	0		73.71	64.8648	64.8648	64.8648	0	0	0	58.054	58.054	0	0	0		64.8648	100	100	100		100	0	64.8648	100
UK	UKI3	Inner London	0	12	0	0	0	100	0	100	0	100	10.5	0	0	0		0	0	0	0	0	0	0	0	0	0	0	0		0	100	100	100		0	0	0	0
UK	UKI4	Inner London	0	12	0	0	0	100	0	100	0	100	10.5	0	0	0		0	0	0	0	0	0	0	0	0	0	0	0		0	100	100	100		0	0	0	0
UK	UKI5	Outer London	0	12	0	0	0	100	0	100	0	100	10.5	0	0	0		0	0	0	0	0	0	0	0	0	0	0	0		0	100	100	100		0	0	0	0
UK	UKI6	Outer London	0	12	0	0	0	100	0	100	0	100	10.5	0	0	0		0	0	0	0	0	0	0	0	0	0	0	0		0	100	100	100		0	0	0	0
UK	UKI7	Outer London	0	12	0	0	0	100	0	100	0	100	10.5	0	0	0		0	0	0	0	0	0	0	0	0	0	0	0		0	100	100	100		0	0	0	0
UK	UKJ1	Berkshire, Buckinghamshire and Oxfordshire	0	12	0	0	0	100	0	100	0	100	10.5	0	0	0		0	0	0	0	0	0	0	0	0	0	0	0		0	100	100	100		0	0	0	0
UK	UKJ2	Berkshire, Buckinghamshire and Oxfordshire	0	12	0	0	0	41.8605	0	100	0	100	10.5	0	0	0		463.32	407.722	407.722	407.722	237.047	0	0	364.911	364.911	212.157	0	0		407.722	100	100	100	BioE_COM-S	41.8605	237.047	170.674	41.8605
UK	UKJ3	Hampshire and Isle of Wight	0	12	0	0	0	100	0	100	0	100	10.5	0	0	0		224.289	197.374	197.374	197.374	0	0	0	176.65	176.65	0	0	0		197.374	100	100	100		100	0	197.374	100
UK	UKJ4	Hampshire and Isle of Wight	0	12	0	0	0	0	0	0	0	0	10.5	0	0	0		0	0	0	0	0	0	0	0	0	0	0	0		0	100	100	100		0	0	0	0
UK	UKK1	Gloucestershire, Wiltshire and Bristol/Bath area	0	12	0	0	0	0	0	0	0	0	10.5	0	0	0		52.65	46.332	46.332	46.332	46.332	46.332	46.332	41.4671	41.4671	41.4671	41.4671	41.4671		46.332	100	100	100	BioE_COM-S & BioE_COM-M & BioE_COM-L	0	46.332	0	0
UK	UKK2	Dorset and Somerset	0	12	0	0	0	0	0	100	0	100	10.5	0	0	0		21.06	18.5328	18.5328	18.5328	18.5328	0	0	16.5869	16.5869	16.5869	0	0		18.5328	100	100	100	BioE_COM-S	0	18.5328	0	0
UK	UKK3	Cornwall and Isles of Scilly	0	12	0	0	0	0	0	100	0	100	10.5	0	0	0		52.65	46.332	46.332	46.332	46.332	0	0	41.4671	41.4671	41.4671	0	0		46.332	100	100	100	BioE_COM-S	0	46.332	0	0
UK	UKK4	Devon	0	12	0	0	0	0	0	100	0	100	10.5	0	0	0		0	0	0	0	0	0	0	0	0	0	0	0		0	100	100	100		0	0	0	0
UK	UKL1	West Wales and The Valleys	10.4895	12	0	0	0	100	0	100	0	100	10.5	0	0	0		10.53	8.2944	8.2944	8.2944	0	0	0	7.42349	7.42349	0	0	0		8.2944	100	100	100		100	0	8.2944	100
UK	UKL2	East Wales	10.4895	12	0	0	0	100	0	100	0	100	10.5	0	0	0		0	0	0	0	0	0	0	0	0	0	0	0		0	100	100	100		0	0	0	0
UK	UKM2	Eastern Scotland	10.4895	12	0	0	0	100	0	100	0	100	10.5	0	0	0		0	0	0	0	0	0	0	0	0	0	0	0		0	100	100	100		0	0	0	0
UK	UKM3	South Western Scotland	10.4895	12	0	0	0	100	0	100	0	100	10.5	0	0	0		0	0	0	0	0	0	0	0	0	0	0	0		0	100	100	100		0	0	0	0
UK	UKM5	North Eastern Scotland	10.4895	12	0	0	0	100	0	100	0	100	10.5	0	0	0		0	0	0	0	0	0	0	0	0	0	0	0		0	100	100	100		0	0	0	0
UK	UKM6	Highlands and Islands	10.4895	12	0	0	0	100	0	100	0	100	10.5	0	0	0		0	0	0	0	0	0	0	0	0	0	0	0		0	100	100	100		0	0	0	0
UK	UKN0	Northern Ireland	10.4895	12	0	0	0	100	0	100	0	100	10.5	0	0	0		0	0	0	0	0	0	0	0	0	0	0	0		0	100	100	100		0	0	0	0

## Sheet: TOTAL
ALL SPECIES			CRT	CRE_WASTE	CRE_SELF	CRE_COM-S	CRE_COM-M	CRE_COM-L	CRI_WASTE	CRI_SELF	CRI_COM-S	CRI_COM-M	CRI_COM-L		BioTH	BioT	BioE_WASTE	BioE_SELF	BioE_COM-S	BioE_COM-M	BioE_COM-L	BioI_WASTE	BioI_SELF	BioI_COM-S	BioI_COM-M	BioI_COM-L		BioT	CRE_COM			Best economic case	CR BEST Economic	BioE_COM_BEST	GAP = BioT - BioE_COM_BEST
Country	NUTs2	NAME	(%)	(%)	(%)	(%)	(%)	(%)	(%)	(%)	(%)	(%)	(%)		t DM·yr-1	t DM·yr-1	t DM·yr-1	t DM·yr-1	t DM·yr-1	t DM·yr-1	t DM·yr-1	t DM·yr-1	t DM·yr-1	t DM·yr-1	t DM·yr-1	t DM·yr-1		(DM t)	S	M	L		(%)	(DM t)	(DM t)	(%)
AT	AT11	Burgenland (A)	11.5005	0	7.00648	35.441	74.5731	80.2958	14.9057	15.4814	15.4814	15.4814	15.4814		16575.4	14669.1	14669.1	13641.3	9470.23	3729.9	2890.44	12482.6	11529.5	8004.11	3152.46	2442.96		14669.1	35.441	74.5731	80.2958	BioE_COM-S	35.441	9470.23	5198.89	35.441
AT	AT12	Nieder÷sterreich	11.6038	0	6.94546	37.1502	75.5365	76.1136	12.1271	12.6119	12.6119	12.6119	12.6119		34614.8	30598.1	30598.1	28473	19230.9	7485.38	7308.78	26887.5	24882	16805.5	6541.33	6387		30598.1	37.1502	75.5365	76.1136	BioE_COM-S	37.1502	19230.9	11367.3	37.1502
AT	AT13	Wien	11.0397	0	8.71841	100	100	100	2.69025	2.56516	0	0	0		836.326	743.998	743.998	679.134	0	0	0	723.983	661.713	0	0	0		743.998	100	100	100		100	0	743.998	100
AT	AT21	Kõrnten	9.47696	0	8.37514	74.3141	74.3141	74.3141	19.4378	21.0796	20	20	20		331.159	299.775	299.775	274.668	77	77	77	241.505	216.769	61.6	61.6	61.6		299.775	74.3141	74.3141	74.3141	BioE_COM-S & BioE_COM-M & BioE_COM-L	74.3141	77	222.775	74.3141
AT	AT22	Steiermark	9.64546	0	3.56724	42.4483	99.8075	100	9.56384	9.77666	9.77666	9.77666	0		22268.4	20120.5	20120.5	19402.7	11579.7	38.728	0	18196.2	17505.8	10447.6	34.9417	0		20120.5	42.4483	99.8075	100	BioE_COM-S	42.4483	11579.7	8540.81	42.4483
AT	AT31	Ober÷sterreich	9.04519	0	2.69979	41.9306	99.8058	100	23.473	24.1243	24.1243	24.1243	0		1398.01	1271.55	1271.55	1237.22	738.383	2.46951	0	973.082	938.753	560.254	1.87376	0		1271.55	41.9306	99.8058	100	BioE_COM-S	41.9306	738.383	533.17	41.9306
AT	AT32	Salzburg	9	0	0	40.3194	99.8004	100	100	100	100	100	0		63.9272	58.1738	58.1738	58.1738	34.7185	0.116115	0	0	0	0	0	0		58.1738	40.3194	99.8004	100	BioE_COM-S	40.3194	34.7185	23.4553	40.3194
AT	AT33	Tirol	9	0	21.0526	52.8837	99.8424	100	15.7895	20	20	20	0		305.98	278.442	278.442	219.823	131.192	0.438768	0	234.478	175.858	104.953	0.351014	0		278.442	52.8837	99.8424	100	BioE_COM-S	52.8837	131.192	147.251	52.8837
AT	AT34	Vorarlberg	9.27527	0	15.1833	49.3809	99.8307	100	15.5393	18.3211	18.3211	18.3211	0		114.761	104.117	104.117	88.3083	52.703	0.176264	0	87.9377	72.1293	43.0472	0.143971	0		104.117	49.3809	99.8307	100	BioE_COM-S	49.3809	52.703	51.4137	49.3809
BE	BE10	Region de Bruxelles-Capitalet	0	0	0	0	0	0	0	0	0	0	0		0	0	0	0	0	0	0	0	0	0	0	0		0	0	0	0		0	0	0	0
BE	BE21	Prov. Antwerpen	9	0	2.7027	100	100	100	1	1	0	0	0		742.561	675.73	675.73	657.467	0	0	0	668.973	650.893	0	0	0		675.73	100	100	100		100	0	675.73	100
BE	BE22	Prov. Limburg (B)	9	0	0.783875	3.68705	2.4532	1.65483	1.99776	2.00564	2.00564	2.00564	2.00564		19188.6	17461.6	17461.6	17324.7	16817.8	17033.2	17172.6	17112.8	16977.3	16480.5	16691.6	16828.2		17461.6	3.68705	2.4532	1.65483	BioE_COM-L	1.65483	17172.6	288.959	1.65483
BE	BE23	Prov. Oost-Vlaanderen	9	0	0.763359	100	100	100	1	1	0	0	0		2855.24	2598.27	2598.27	2578.43	0	0	0	2572.28	2552.65	0	0	0		2598.27	100	100	100		100	0	2598.27	100
BE	BE24	Prov. Vlaams-Brabant	9	0	0.787402	12.9359	13.189	18.2508	3.33858	3.35714	3.35714	3.35714	3.35714		9052.24	8237.54	8237.54	8172.68	7171.94	7151.09	6734.12	7962.52	7898.31	6931.17	6911.02	6508.05		8237.54	12.9359	13.189	18.2508	BioE_COM-S	12.9359	7171.94	1065.6	12.9359
BE	BE25	Prov. West-Vlaanderen	9	0	0	100	100	100	22.2143	22.2143	0	0	0		634.564	577.453	577.453	577.453	0	0	0	449.176	449.176	0	0	0		577.453	100	100	100		100	0	577.453	100
BE	BE31	Prov. Brabant Wallon	9	0	0	100	100	100	1	1	0	0	0		340.473	309.83	309.83	309.83	0	0	0	306.732	306.732	0	0	0		309.83	100	100	100		100	0	309.83	100
BE	BE32	Prov. Hainaut	9	0	0	100	100	100	1	1	0	0	0		39.9996	36.3996	36.3996	36.3996	0	0	0	36.0356	36.0356	0	0	0		36.3996	100	100	100		100	0	36.3996	100
BE	BE33	Prov. LiÞge	9	0	0	58.5366	58.5366	42.6829	1	1	1	1	1		1669.77	1519.49	1519.49	1519.49	630.032	630.032	870.927	1504.29	1504.29	623.732	623.732	862.218		1519.49	58.5366	58.5366	42.6829	BioE_COM-L	42.6829	870.927	648.563	42.6829
BE	BE34	Prov. Luxembourg (B)	0	0	0	0	0	0	0	0	0	0	0		0	0	0	0	0	0	0	0	0	0	0	0		0	0	0	0		0	0	0	0
BE	BE35	Prov. Namur	9	0	0	100	100	100	1	1	0	0	0		375.376	341.592	341.592	341.592	0	0	0	338.176	338.176	0	0	0		341.592	100	100	100		100	0	341.592	100
BG	BG31	Severozapaden	10.2707	0	30.0788	100	100	100	8.55692	9.81278	0	0	0		13734.2	12323.6	12323.6	8616.8	0	0	0	11269.1	7771.25	0	0	0		12323.6	100	100	100		100	0	12323.6	100
BG	BG32	Severen tsentralen	9.61111	0	15.1357	97.9727	100	100	14.0253	15.4002	15.4002	0	0		19777.4	17876.6	17876.6	15170.9	362.415	0	0	15369.4	12834.5	306.602	0	0		17876.6	97.9727	100	100	BioE_COM-S	97.9727	362.415	17514.2	97.9727
BG	BG33	Severoiztochen	10.2444	0	16.9996	99.9822	100	100	10.8389	12.0949	12.0949	0	0		13684.4	12282.5	12282.5	10194.5	2.1872	0	0	10951.2	8961.52	1.92266	0	0		12282.5	99.9822	100	100	BioE_COM-S	99.9822	2.1872	12280.3	99.9822
BG	BG34	Yugoiztochen	10.5135	0	17.8033	79.4581	98.0692	99.8113	6.82088	7.15617	7.15617	7.15617	7.15617		44792.4	40083.2	40083.2	32947	8233.85	773.923	75.6467	37349.1	30589.3	7644.62	718.54	70.2332		40083.2	79.4581	98.0692	99.8113	BioE_COM-S	79.4581	8233.85	31849.3	79.4581
BG	BG41	Yugozapaden	9.94431	0	50.0963	88.8041	100	100	7.23906	8.30787	8.30787	0	0		14927.2	13442.8	13442.8	6708.44	1505.03	0	0	12469.6	6151.11	1380	0	0		13442.8	88.8041	100	100	BioE_COM-S	88.8041	1505.03	11937.7	88.8041
BG	BG42	Yuzhen tsentralen	10.5932	0	25.0737	76.2853	92.2061	100	6.89032	7.52751	7.52751	7.52751	0		37909.4	33893.6	33893.6	25395.2	8037.77	2641.63	0	31558.2	23483.6	7432.72	2442.78	0		33893.6	76.2853	92.2061	100	BioE_COM-S	76.2853	8037.77	25855.8	76.2853
CY	CY00	Kypros/Kibris	8.96255	0	48.2202	66.5938	81.7665	77.8981	17.0799	16.7727	16.7727	16.7727	16.7727		49941.4	45465.4	45465.4	23541.9	15188.2	8289.94	10048.7	37699.9	19593.3	12640.8	6899.5	8363.26		45465.4	66.5938	81.7665	77.8981	BioE_COM-S	66.5938	15188.2	30277.1	66.5938
CZ	CZ01	Praha	9	0	0	100	100	100	15	15	0	0	0		197.673	179.883	179.883	179.883	0	0	0	152.9	152.9	0	0	0		179.883	100	100	100		100	0	179.883	100
CZ	CZ02	Stredni Cechy	9.09045	0	0.846093	71.7616	100	100	19.4051	19.4611	19.4611	0	0		8382.06	7620.09	7620.09	7555.62	2151.79	0	0	6141.41	6085.22	1733.03	0	0		7620.09	71.7616	100	100	BioE_COM-S	71.7616	2151.79	5468.3	71.7616
CZ	CZ03	Jihozapad	9	0	1.74419	45.9797	100	100	31.8023	32.1006	32.1006	0	0		2754.59	2506.68	2506.68	2462.95	1354.11	0	0	1709.49	1672.33	919.435	0	0		2506.68	45.9797	100	100	BioE_COM-S	45.9797	1354.11	1152.56	45.9797
CZ	CZ04	Severozapad	9.24458	0	0	100	100	100	29.1146	29.1146	0	0	0		4262.36	3868.33	3868.33	3868.33	0	0	0	2742.08	2742.08	0	0	0		3868.33	100	100	100		100	0	3868.33	100
CZ	CZ05	Severovychod	9	0	1.06952	62.181	100	100	23.6364	23.7297	23.7297	0	0		6664.13	6064.36	6064.36	5999.5	2293.48	0	0	4630.96	4575.83	1749.24	0	0		6064.36	62.181	100	100	BioE_COM-S	62.181	2293.48	3770.88	62.181
CZ	CZ06	Jihovychod	10.8827	0	5.04532	92.6599	100	100	17.2011	17.977	17.977	0	0		22651.7	20186.6	20186.6	19168.1	1481.72	0	0	16714.2	15722.2	1215.35	0	0		20186.6	92.6599	100	100	BioE_COM-S	92.6599	1481.72	18704.8	92.6599
CZ	CZ07	Stredni Morava	9.12946	0	1.72809	100	100	100	43.9905	44.5513	0	0	0		5612.17	5099.81	5099.81	5011.68	0	0	0	2856.38	2778.91	0	0	0		5099.81	100	100	100		100	0	5099.81	100
CZ	CZ08	Moravskoslezsko	9	0	2.12766	100	100	100	69.2553	70.4348	0	0	0		840.631	764.974	764.974	748.698	0	0	0	235.189	221.354	0	0	0		764.974	100	100	100		100	0	764.974	100
DE	DE11	Stuttgart	10.9902	0	10.5521	73.2124	100	100	9.41335	9.79078	9.79078	0	0		16197.2	14417.1	14417.1	12895.8	3862	0	0	13060	11633.2	3483.88	0	0		14417.1	73.2124	100	100	BioE_COM-S	73.2124	3862	10555.1	73.2124
DE	DE12	Karlsruhe	10.4063	0	9.66182	91.6914	97.9157	93.7757	4.53229	11.1749	11.1749	11.1749	11.1749		4677.75	4190.97	4190.97	3786.05	348.211	87.3519	260.859	4001.02	3362.96	309.299	77.5904	231.708		4190.97	91.6914	97.9157	93.7757	BioE_COM-S	91.6914	348.211	3842.76	91.6914
DE	DE13	Freiburg	10.3934	0	9.64233	22.5019	48.8308	51.8798	4.53672	11.2057	11.2057	11.2057	11.2057		24694.9	22128.2	22128.2	19994.6	17149	11322.8	10648.2	21124.4	17754	15227.3	10054	9454.96		22128.2	22.5019	48.8308	51.8798	BioE_COM-S	22.5019	17149	4979.27	22.5019
DE	DE14	Tübingen	9.10829	0	7.72463	38.9821	85.2695	96.0778	4.9549	14.1125	14.1125	14.1125	14.1125		15500.3	14088.5	14088.5	13000.2	8596.52	2075.31	552.573	13390.4	11165.6	7383.33	1782.43	474.591		14088.5	38.9821	85.2695	96.0778	BioE_COM-S	38.9821	8596.52	5492	38.9821
DE	DE21	Oberbayern	9.19723	0	5.93011	100	100	100	16.6532	17.1881	0	0	0		502.949	456.691	456.691	429.609	0	0	0	380.638	355.767	0	0	0		456.691	100	100	100		100	0	456.691	100
DE	DE22	Niederbayern	9.15897	0	6.20922	100	100	100	4.25187	18.0434	0	0	0		268.214	243.649	243.649	228.52	0	0	0	233.289	187.287	0	0	0		243.649	100	100	100		100	0	243.649	100
DE	DE23	Oberpfalz	9	0	7.37	100	100	100	5	21.6345	0	0	0		87.1417	79.299	79.299	73.4546	0	0	0	75.334	57.5631	0	0	0		79.299	100	100	100		100	0	79.299	100
DE	DE24	Oberfranken	9.01805	0	7.37856	21.157	100	100	4.99418	21.5624	21.5624	0	0		1749.96	1592.15	1592.15	1474.67	1255.3	0	0	1512.64	1156.7	984.628	0	0		1592.15	21.157	100	100	BioE_COM-S	21.157	1255.3	336.851	21.157
DE	DE25	Mittelfranken	9.9057	0	7.55158	100	100	100	4.56314	17.3599	0	0	0		976.367	879.651	879.651	813.223	0	0	0	839.511	672.048	0	0	0		879.651	100	100	100		100	0	879.651	100
DE	DE26	Unterfranken	10.9753	0	8.31402	65.3707	100	100	4.34199	13.4533	13.4533	0	0		8162.96	7267.05	7267.05	6662.87	2516.53	0	0	6951.51	5766.49	2177.97	0	0		7267.05	65.3707	100	100	BioE_COM-S	65.3707	2516.53	4750.52	65.3707
DE	DE27	Schwaben	9.07491	0	7.28831	7.28831	41.1556	100	4.90977	21.0511	21.0511	21.0511	0		1584.16	1440.4	1440.4	1335.42	1335.42	847.594	0	1369.68	1054.3	1054.3	669.166	0		1440.4	7.28831	41.1556	100	BioE_COM-S	7.28831	1335.42	104.981	7.28831
DE	DE30	Berlin	0	0	0	0	0	0	0	0	0	0	0		0	0	0	0	0	0	0	0	0	0	0	0		0	0	0	0		0	0	0	0
DE	DE40	Brandenburg	9.01008	0	0.374719	32.8852	85.4529	100	27.7796	27.8653	27.8653	27.8653	0		6269.49	5704.6	5704.6	5683.23	3828.63	829.852	0	4119.88	4099.58	2761.77	598.611	0		5704.6	32.8852	85.4529	100	BioE_COM-S	32.8852	3828.63	1875.97	32.8852
DE	DE50	Bremen	0	0	0	0	0	0	0	0	0	0	0		0	0	0	0	0	0	0	0	0	0	0	0		0	0	0	0		0	0	0	0
DE	DE60	Hamburg	9	0	1.34228	1.34228	18.1169	4.75408	15.8389	15.9864	15.9864	15.9864	15.9864		2624.64	2388.42	2388.42	2356.36	2356.36	1955.71	2274.88	2010.12	1979.67	1979.67	1643.07	1911.2		2388.42	1.34228	18.1169	4.75408	BioE_COM-S	1.34228	2356.36	32.0594	1.34228
DE	DE71	Darmstadt	10.9945	0	4.70685	62.8145	61.7133	59.3416	17.1408	17.7707	17.7707	17.7707	17.7707		5420.58	4824.61	4824.61	4597.52	1794.06	1847.18	1961.61	3997.64	3780.51	1475.24	1518.93	1613.02		4824.61	62.8145	61.7133	59.3416	BioE_COM-L	59.3416	1961.61	2863	59.3416
DE	DE72	Gießen	9	0	5.34	100	100	100	5	37.1765	0	0	0		182.34	165.929	165.929	157.069	0	0	0	157.633	98.676	0	0	0		165.929	100	100	100		100	0	165.929	100
DE	DE73	Kassel	9	0	5.34	100	100	100	5	37.1765	0	0	0		641.086	583.389	583.389	552.236	0	0	0	554.219	346.934	0	0	0		583.389	100	100	100		100	0	583.389	100
DE	DE80	Mecklenburg-Vorpommern	9	0	0	78.1193	100	100	42.6816	42.6816	42.6816	0	0		3257.6	2964.41	2964.41	2964.41	648.633	0	0	1699.16	1699.16	371.786	0	0		2964.41	78.1193	100	100	BioE_COM-S	78.1193	648.633	2315.78	78.1193
DE	DE91	Braunschweig	9	0	0.929752	78.3228	100	100	17.3657	17.3827	17.3827	0	0		369.471	336.219	336.219	333.093	72.8829	0	0	277.832	275.192	60.2139	0	0		336.219	78.3228	100	100	BioE_COM-S	78.3228	72.8829	263.336	78.3228
DE	DE92	Hannover	9	0	0.93	78.3228	100	100	5	17.3785	17.3785	0	0		464.323	422.534	422.534	418.605	91.5934	0	0	401.407	345.857	75.6758	0	0		422.534	78.3228	100	100	BioE_COM-S	78.3228	91.5934	330.941	78.3228
DE	DE93	Lüneburg	9	0	0.93	9.07598	11.7124	10.2252	5	17.3785	17.3785	17.3785	17.3785		16406.8	14930.2	14930.2	14791.3	13575.1	13181.5	13403.6	14183.7	12220.8	11216	10890.8	11074.2		14930.2	9.07598	11.7124	10.2252	BioE_COM-S	9.07598	13575.1	1355.06	9.07598
DE	DE94	Weser-Ems	9	0	0.93	9.07598	11.7124	10.2252	5	17.3785	17.3785	17.3785	17.3785		255.127	232.166	232.166	230.007	211.095	204.974	208.426	220.558	190.035	174.409	169.352	172.205		232.166	9.07598	11.7124	10.2252	BioE_COM-S	9.07598	211.095	21.0713	9.07598
DE	DEA1	Düsseldorf	9	0	0.621118	100	100	100	14.146	14.2031	0	0	0		1373.43	1249.82	1249.82	1242.06	0	0	0	1073.02	1065.65	0	0	0		1249.82	100	100	100		100	0	1249.82	100
DE	DEA2	Köln	9.01844	0	0.615553	11.7689	14.9556	100	4.98599	14.125	14.125	14.125	0		3807.23	3463.88	3463.88	3442.55	3056.22	2945.83	0	3291.17	2956.29	2624.53	2529.73	0		3463.88	11.7689	14.9556	100	BioE_COM-S	11.7689	3056.22	407.661	11.7689
DE	DEA3	Münster	9	0	0.62	11.7729	14.9594	100	5	14.2055	14.2055	14.2055	0		331.519	301.683	301.683	299.812	266.166	256.553	0	286.598	257.222	228.356	220.108	0		301.683	11.7729	14.9594	100	BioE_COM-S	11.7729	266.166	35.5167	11.7729
DE	DEA4	Detmold	9	0	0.62	11.7729	14.9594	100	5	14.2055	14.2055	14.2055	0		742.164	675.369	675.369	671.182	595.859	574.338	0	641.601	575.837	511.214	492.75	0		675.369	11.7729	14.9594	100	BioE_COM-S	11.7729	595.859	79.5103	11.7729
DE	DEA5	Arnsberg	9	0	0.62	11.7729	14.9594	100	5	14.2055	14.2055	14.2055	0		189.135	172.112	172.112	171.045	151.85	146.366	0	163.507	146.748	130.279	125.574	0		172.112	11.7729	14.9594	100	BioE_COM-S	11.7729	151.85	20.2626	11.7729
DE	DEB1	Koblenz	11.284	0	4.13499	92.4627	94.4648	98.9401	4.24481	10.2494	10.2494	10.2494	10.2494		9626.3	8540.07	8540.07	8186.93	643.69	472.71	90.5189	8177.56	7347.82	577.716	424.26	81.2413		8540.07	92.4627	94.4648	98.9401	BioE_COM-S	92.4627	643.69	7896.38	92.4627
DE	DEB2	Trier	11.8401	0	4.31718	100	100	100	4.05502	9.43134	0	0	0		7619.18	6717.06	6717.06	6427.08	0	0	0	6444.68	5820.92	0	0	0		6717.06	100	100	100		100	0	6717.06	100
DE	DEB3	Rheinhessen-Pfalz	11.5887	0	4.23418	7.87557	9.62448	6.4921	9.63791	9.79984	9.79984	9.79984	9.79984		60467.5	53460.1	53460.1	51196.5	49249.9	48314.9	49989.5	48307.7	46179.4	44423.4	43580.1	45090.6		53460.1	7.87557	9.62448	6.4921	BioE_COM-L	6.4921	49989.5	3470.69	6.4921
DE	DEC0	Saarland	9.62465	0	4.4292	100	100	100	38.4592	40.0098	0	0	0		455.152	411.345	411.345	393.126	0	0	0	253.145	235.837	0	0	0		411.345	100	100	100		100	0	411.345	100
DE	DED2	Dresden	9.22147	0	0.631456	24.138	24.3161	100	15.7767	15.8516	15.8516	15.8516	0		4849.6	4402.4	4402.4	4374.6	3339.75	3331.91	0	3707.84	3681.16	2810.34	2803.75	0		4402.4	24.138	24.3161	100	BioE_COM-S	24.138	3339.75	1062.65	24.138
DE	DED4	Chemnitz	9	0	0	72.5664	100	100	5	16.685	16.685	0	0		555.935	505.901	505.901	505.901	138.787	0	0	480.606	421.492	115.63	0	0		505.901	72.5664	100	100	BioE_COM-S	72.5664	138.787	367.114	72.5664
DE	DED5	Leipzig	9	0	0	36.4662	100	100	5	16.685	16.685	0	0		3134.23	2852.15	2852.15	2852.15	1812.08	0	0	2709.54	2376.26	1509.73	0	0		2852.15	36.4662	100	100	BioE_COM-S	36.4662	1812.08	1040.07	36.4662
DE	DEE0	Sachsen-Anhalt	9.38474	0	1.12798	85.0844	100	100	27.1995	27.4595	27.4595	0	0		4597.99	4166.48	4166.48	4119.48	621.454	0	0	3033.22	2988.29	450.805	0	0		4166.48	85.0844	100	100	BioE_COM-S	85.0844	621.454	3545.03	85.0844
DE	DEF0	Schleswig-Holstein	9	0	2.43902	26.454	26.454	26.454	17.7439	18.0625	18.0625	18.0625	18.0625		1385.69	1260.97	1260.97	1230.22	927.396	927.396	927.396	1037.23	1008.01	759.885	759.885	759.885		1260.97	26.454	26.454	26.454	BioE_COM-S & BioE_COM-M & BioE_COM-L	26.454	927.396	333.579	26.454
DE	DEG0	Thüringen	9.07174	0	0.421059	45.9183	100	100	14.577	14.6175	14.6175	0	0		3963.01	3603.49	3603.49	3588.32	1948.83	0	0	3078.21	3063.8	1663.96	0	0		3603.49	45.9183	100	100	BioE_COM-S	45.9183	1948.83	1654.66	45.9183
DK	DK01	Hovedstaden	9	0	0	100	100	100	50.5	50.5	0	0	0		135.292	123.116	123.116	123.116	0	0	0	60.9422	60.9422	0	0	0		123.116	100	100	100		100	0	123.116	100
DK	DK02	Sjaelland	9	0	1.44928	42.8406	100	100	19.6522	19.9265	19.9265	0	0		1191.21	1084	1084	1068.29	619.609	0	0	870.972	855.419	496.143	0	0		1084	42.8406	100	100	BioE_COM-S	42.8406	619.609	464.393	42.8406
DK	DK03	Syddanmark	9.0033	0	0.996732	100	100	100	11.852	11.9612	0	0	0		1534.12	1396	1396	1382.08	0	0	0	1230.54	1216.77	0	0	0		1396	100	100	100		100	0	1396	100
DK	DK04	Midtjylland	9	0	0	100	100	100	25.75	25.75	0	0	0		300.69	273.628	273.628	273.628	0	0	0	203.169	203.169	0	0	0		273.628	100	100	100		100	0	273.628	100
DK	DK05	Nordjylland	9	0	0	100	100	100	43.4286	43.4286	0	0	0		105.001	95.5513	95.5513	95.5513	0	0	0	54.0547	54.0547	0	0	0		95.5513	100	100	100		100	0	95.5513	100
EE	EE00	Eesti	9	0	4.13223	100	100	100	99.2066	100	0	0	0		1800	1638	1638	1570.31	0	0	0	12.9957	0	0	0	0		1638	100	100	100		100	0	1638	100
EL	EL30	Attiki	5.73281	0	37.3999	100	100	100	29.6191	31.5398	0	0	0		37085.2	34959.1	34959.1	21884.4	0	0	0	24604.6	14982.1	0	0	0		34959.1	100	100	100		100	0	34959.1	100
EL	EL41	Voreio Aigaio	5.75337	0	23.2164	100	100	100	33.228	36.1741	0	0	0		107095	100933	100933	77500	0	0	0	67395	49465.1	0	0	0		100933	100	100	100		100	0	100933	100
EL	EL42	Notio Aigaio	5.66489	0	42.27	100	100	100	24.9547	24.8842	0	0	0		28199.7	26602.2	26602.2	15357.4	0	0	0	19963.7	11535.9	0	0	0		26602.2	100	100	100		100	0	26602.2	100
EL	EL43	Kriti	5.0133	0	26.2252	100	100	100	29.2416	29.8575	0	0	0		237759	225840	225840	166613	0	0	0	159801	116866	0	0	0		225840	100	100	100		100	0	225840	100
EL	EL51	Anatoliki Makedonia, Thraki	6.79701	0	23.1171	100	100	100	24.2818	24.0713	0	0	0		26239.8	24456.3	24456.3	18802.7	0	0	0	18517.9	14276.7	0	0	0		24456.3	100	100	100		100	0	24456.3	100
EL	EL52	Kentriki Makedonia	7.76242	0	17.4788	17.4788	17.4788	17.4788	19.008	19.1526	19.1526	19.1526	19.1526		132704	122403	122403	101008	101008	101008	101008	99136.6	81662.6	81662.6	81662.6	81662.6		122403	17.4788	17.4788	17.4788	BioE_COM-S & BioE_COM-M & BioE_COM-L	17.4788	101008	21394.6	17.4788
EL	EL53	Dytiki Makedonia	9.52755	0	15.4293	15.4293	15.4293	15.4293	13.032	13.3042	13.3042	13.3042	13.3042		13988.1	12655.3	12655.3	10702.7	10702.7	10702.7	10702.7	11006.1	9278.8	9278.8	9278.8	9278.8		12655.3	15.4293	15.4293	15.4293	BioE_COM-S & BioE_COM-M & BioE_COM-L	15.4293	10702.7	1952.63	15.4293
EL	EL54	Ipeiros	6.0522	0	36.2298	36.2298	36.2298	36.2298	22.672	23.8221	23.8221	23.8221	23.8221		37655.1	35376.1	35376.1	22559.4	22559.4	22559.4	22559.4	27355.7	17185.3	17185.3	17185.3	17185.3		35376.1	36.2298	36.2298	36.2298	BioE_COM-S & BioE_COM-M & BioE_COM-L	36.2298	22559.4	12816.7	36.2298
EL	EL61	Thessalia	6.71566	0	20.7919	20.7919	20.7919	20.7919	28.5583	29.5885	29.5885	29.5885	29.5885		64815.3	60462.5	60462.5	47891.2	47891.2	47891.2	47891.2	43195.4	33720.9	33720.9	33720.9	33720.9		60462.5	20.7919	20.7919	20.7919	BioE_COM-S & BioE_COM-M & BioE_COM-L	20.7919	47891.2	12571.3	20.7919
EL	EL62	Ionia Nisia	4.82287	0	41.8866	41.8866	41.8866	41.8866	28.6601	29.0253	29.0253	29.0253	29.0253		52440.6	49911.5	49911.5	29005.3	29005.3	29005.3	29005.3	35606.8	20586.4	20586.4	20586.4	20586.4		49911.5	41.8866	41.8866	41.8866	BioE_COM-S & BioE_COM-M & BioE_COM-L	41.8866	29005.3	20906.2	41.8866
EL	EL63	Dytiki Ellada	5.55357	0	29.1593	29.1593	29.1593	29.1593	30.6175	31.673	31.673	31.673	31.673		150332	141983	141983	100582	100582	100582	100582	98511.4	68724.6	68724.6	68724.6	68724.6		141983	29.1593	29.1593	29.1593	BioE_COM-S & BioE_COM-M & BioE_COM-L	29.1593	100582	41401.3	29.1593
EL	EL64	Sterea Ellada	4.85163	0	27.4258	27.4258	27.4258	27.4258	30.4624	31.1407	31.1407	31.1407	31.1407		111757	106335	106335	77172	77172	77172	77172	73943	53140.1	53140.1	53140.1	53140.1		106335	27.4258	27.4258	27.4258	BioE_COM-S & BioE_COM-M & BioE_COM-L	27.4258	77172	29163.3	27.4258
EL	EL65	Peloponnisos	5.64975	0	17.342	17.342	17.342	17.342	28.7555	29.6699	29.6699	29.6699	29.6699		316169	298306	298306	246574	246574	246574	246574	212527	173416	173416	173416	173416		298306	17.342	17.342	17.342	BioE_COM-S & BioE_COM-M & BioE_COM-L	17.342	246574	51732.2	17.342
ES	ES11	Galicia	11.8611	0	23.2426	45.7365	62.8387	99.8261	3.42728	3.68606	3.68606	3.68606	3.68606		19489.3	17177.6	17177.6	13185.1	9321.19	6383.42	29.8756	16588.9	12699.1	8977.61	6148.13	28.7744		17177.6	45.7365	62.8387	99.8261	BioE_COM-S	45.7365	9321.19	7856.44	45.7365
ES	ES12	Principado de Asturias	9.08765	0	13.3074	62.072	100	100	2.60854	2.63861	2.63861	0	0		6070.17	5518.54	5518.54	4784.16	2093.07	0	0	5374.58	4657.93	2037.84	0	0		5518.54	62.072	100	100	BioE_COM-S	62.072	2093.07	3425.47	62.072
ES	ES13	Cantabria	9.32244	0	5.32687	58.5805	100	100	0.288526	0.30476	0.30476	0	0		377.796	342.576	342.576	324.328	141.893	0	0	341.588	323.339	141.461	0	0		342.576	58.5805	100	100	BioE_COM-S	58.5805	141.893	200.683	58.5805
ES	ES21	País Vasco	11.3323	0	4.8697	5.10468	4.8697	4.8697	2.47901	2.46146	2.46146	2.46146	2.46146		19746.6	17508.9	17508.9	16656.2	16615.1	16656.2	16656.2	17074.8	16246.3	16206.1	16246.3	16246.3		17508.9	5.10468	4.8697	4.8697	BioE_COM-M & BioE_COM-L	4.8697	16656.2	852.63	4.8697
ES	ES22	Comunidad Foral de Navarra	9.95095	0	3.51458	23.7692	47.1172	39.8501	7.41553	7.59315	7.59315	7.59315	7.59315		38991.5	35111.5	35111.5	33877.5	26765.8	18568	21119.5	32507.8	31305.1	24733.4	17158.1	19515.9		35111.5	23.7692	47.1172	39.8501	BioE_COM-S	23.7692	26765.8	8345.7	23.7692
ES	ES23	La Rioja	10.8612	0	3.62615	7.57568	13.4307	7.41112	5.09436	5.19949	5.19949	5.19949	5.19949		61838.1	55121.7	55121.7	53122.9	50945.9	47718.5	51036.6	52313.6	50360.8	48297	45237.4	48383		55121.7	7.57568	13.4307	7.41112	BioE_COM-L	7.41112	51036.6	4085.14	7.41112
ES	ES24	Arag¾n	8.43473	0	2.90453	15.5848	30.978	32.1171	4.33454	4.39079	4.39079	4.39079	4.39079		221837	203126	203126	197226	171469	140201	137888	194321	188566	163940	134046	131833		203126	15.5848	30.978	32.1171	BioE_COM-S	15.5848	171469	31656.7	15.5848
ES	ES30	Comunidad de Madrid	5.96624	0	5.00214	49.0466	61.8775	43.4208	11.8208	12.1803	12.1803	12.1803	12.1803		32177	30257.3	30257.3	28743.8	15417.1	11534.8	17119.3	26680.6	25242.7	13539.3	10129.9	15034.1		30257.3	49.0466	61.8775	43.4208	BioE_COM-L	43.4208	17119.3	13137.9	43.4208
ES	ES41	Castilla y Le¾n	11.1794	0	6.99332	50.2299	76.2088	88.762	3.94575	4.03591	4.03591	4.03591	4.03591		67632.6	60071.7	60071.7	55870.7	29897.8	14291.8	6750.88	57701.4	53615.8	28691.1	13715	6478.42		60071.7	50.2299	76.2088	88.762	BioE_COM-S	50.2299	29897.8	30173.9	50.2299
ES	ES42	Castilla-La Mancha	8.52925	0	2.83095	22.7311	39.8845	26.4131	10.9057	11.0338	11.0338	11.0338	11.0338		850126	777617	777617	755603	600856	467468	572224	692813	672231	534559	415888	509086		777617	22.7311	39.8845	26.4131	BioE_COM-S	22.7311	600856	176761	22.7311
ES	ES43	Extremadura	7.02524	0	4.56706	14.7734	28.5948	20.7166	14.8059	15.2208	15.2208	15.2208	15.2208		405271	376800	376800	359591	321134	269055	298740	321011	304859	272255	228102	253269		376800	14.7734	28.5948	20.7166	BioE_COM-S	14.7734	321134	55666	14.7734
ES	ES51	Cataluña	8.2795	0	3.15699	7.75899	12.0241	8.12271	5.77004	5.82909	5.82909	5.82909	5.82909		355464	326033	326033	315740	300736	286831	299550	307221	297336	283206	270111	282089		326033	7.75899	12.0241	8.12271	BioE_COM-S	7.75899	300736	25296.9	7.75899
ES	ES52	Comunidad Valenciana	9.25843	0	14.8724	59.409	73.7743	64.4663	7.04582	7.44796	7.44796	7.44796	7.44796		579007	525400	525400	447261	213265	137790	186694	488382	413949	197381	127528	172789		525400	59.409	73.7743	64.4663	BioE_COM-S	59.409	213265	312135	59.409
ES	ES53	Illes Balears	8.96034	0	4.9911	15.9068	23.9658	20.9012	11.9565	11.8647	11.8647	11.8647	11.8647		26740.9	24344.8	24344.8	23129.8	20472.3	18510.4	19256.5	21434.1	20385.5	18043.4	16314.2	16971.7		24344.8	15.9068	23.9658	20.9012	BioE_COM-S	15.9068	20472.3	3872.5	15.9068
ES	ES61	Andalucía	5.56207	0	4.10759	12.9917	18.29	14.1026	9.34197	9.50729	9.50729	9.50729	9.50729		2.08261e+06	1.96677e+06	1.96677e+06	1.88598e+06	1.71125e+06	1.60705e+06	1.6894e+06	1.78303e+06	1.70668e+06	1.54856e+06	1.45426e+06	1.52879e+06		1.96677e+06	12.9917	18.29	14.1026	BioE_COM-S	12.9917	1.71125e+06	255516	12.9917
ES	ES62	Regi¾n de Murcia	9.5853	0	5.96059	37.803	73.2808	41.2242	23.4555	24.7089	24.7089	24.7089	24.7089		240153	217134	217134	204192	135051	58016.4	127622	166204	153738	101681	43681.2	96088.3		217134	37.803	73.2808	41.2242	BioE_COM-S	37.803	135051	82083.1	37.803
ES	ES63	Ciudad Autónoma de Ceuta	0	0	0	0	0	0	0	0	0	0	0		0	0	0	0	0	0	0	0	0	0	0	0		0	0	0	0		0	0	0	0
ES	ES64	Ciudad Autónoma de Melilla	0	0	0	0	0	0	0	0	0	0	0		0	0	0	0	0	0	0	0	0	0	0	0		0	0	0	0		0	0	0	0
ES	ES70	Canarias	25.5603	0	26.3395	55.6269	88.5348	94.2043	3.21233	3.58141	3.58141	3.58141	3.58141		35674.4	26555.9	26555.9	19561.2	11783.7	3044.68	1539.11	25702.9	18860.7	11361.7	2935.64	1483.99		26555.9	55.6269	88.5348	94.2043	BioE_COM-S	55.6269	11783.7	14772.2	55.6269
FI	FI19	Lõnsi-Suomi	25.1057	0	0	39.76	84.4351	92.1318	100	100	100	100	100		75	56.1707	56.1707	56.1707	33.8373	8.7429	4.4196	0	0	0	0	0		56.1707	39.76	84.4351	92.1318	BioE_COM-S	39.76	33.8373	22.3334	39.76
FI	FI1B	Helsinki-Uusimaa	25.1057	0	0	39.76	84.4351	92.1318	28	28	28	28	28		165	123.576	123.576	123.576	74.442	19.2344	9.72313	88.9744	88.9744	53.5982	13.8487	7.00065		123.576	39.76	84.4351	92.1318	BioE_COM-S	39.76	74.442	49.1336	39.76
FI	FI1C	Etelõ-Suomi	25.1057	0	4.16667	42.27	85.0837	92.4597	46.375	48.3478	48.3478	48.3478	48.3478		345	258.385	258.385	247.619	149.166	38.5416	19.4831	138.559	127.901	77.0474	19.9076	10.0634		258.385	42.27	85.0837	92.4597	BioE_COM-S	42.27	149.166	109.219	42.27
FI	FI1D	Pohjois- ja Suomi	25.1057	0	16.6667	49.8	87.0293	93.4432	100	100	100	100	100		75	56.1707	56.1707	46.8089	28.1977	7.28575	3.683	0	0	0	0	0		56.1707	49.8	87.0293	93.4432	BioE_COM-S	49.8	28.1977	27.973	49.8
FI	FI20	┼land	25.1057	0	3.33333	41.768	84.954	92.3941	1	1	1	1	1		450	337.024	337.024	325.79	196.256	50.7088	25.6337	333.654	322.532	194.294	50.2017	25.3774		337.024	41.768	84.954	92.3941	BioE_COM-S	41.768	196.256	140.768	41.768
FR	FR10	Ille-de-France	9.0278	0	1.07721	100	100	100	6.789	6.8602	0	0	0		2272.88	2067.69	2067.69	2045.41	0	0	0	1927.31	1905.09	0	0	0		2067.69	100	100	100		100	0	2067.69	100
FR	FR21	Champagne-Ardenne	11.9282	0	14.4203	37.4077	58.2546	62.9389	11.0529	11.1129	11.1129	11.1129	11.1129		33281.7	29311.8	29311.8	25084.9	18346.9	12236.3	10863.3	26072	22297.3	16308	10876.5	9656.04		29311.8	37.4077	58.2546	62.9389	BioE_COM-S	37.4077	18346.9	10964.9	37.4077
FR	FR22	Picardie	10.2947	0	4.62054	70.416	100	100	6.92519	6.82535	6.82535	0	0		6270.9	5625.34	5625.34	5365.41	1664.2	0	0	5235.77	4999.21	1550.61	0	0		5625.34	70.416	100	100	BioE_COM-S	70.416	1664.2	3961.14	70.416
FR	FR23	Haute-Normandie	9.00125	0	0.729026	100	100	100	9.34035	9.40711	0	0	0		5139.43	4676.82	4676.82	4642.72	0	0	0	4239.99	4205.98	0	0	0		4676.82	100	100	100		100	0	4676.82	100
FR	FR24	Centre	11.1239	0	1.15405	37.9756	92.7568	90.072	14.3395	14.4104	14.4104	14.4104	14.4104		32359.2	28759.6	28759.6	28427.7	17837.9	2083.12	2855.25	24635.6	24331.1	15267.4	1782.93	2443.8		28759.6	37.9756	92.7568	90.072	BioE_COM-S	37.9756	17837.9	10921.6	37.9756
FR	FR25	Basse-Normandie	9.00181	0	1.23454	36.4466	100	100	11.5094	11.6502	11.6502	0	0		10193.5	9275.93	9275.93	9161.42	5895.17	0	0	8208.33	8094.1	5208.38	0	0		9275.93	36.4466	100	100	BioE_COM-S	36.4466	5895.17	3380.76	36.4466
FR	FR26	Bourgogne	11.845	0	2.2995	9.37849	34.8316	49.2759	16.2007	16.2913	16.2913	16.2913	16.2913		34929.1	30791.7	30791.7	30083.7	27903.9	20066.5	15618.8	25803.3	25182.6	23358	16797.4	13074.3		30791.7	9.37849	34.8316	49.2759	BioE_COM-S	9.37849	27903.9	2887.8	9.37849
FR	FR30	Nord - Pas-de-Calais	9	0	0	100	100	100	16.5727	16.5727	0	0	0		989.935	900.841	900.841	900.841	0	0	0	751.547	751.547	0	0	0		900.841	100	100	100		100	0	900.841	100
FR	FR41	Lorraine	9.14354	0	8.91683	100	100	100	11.6164	12.6852	0	0	0		4996.75	4539.87	4539.87	4135.06	0	0	0	4012.5	3610.52	0	0	0		4539.87	100	100	100		100	0	4539.87	100
FR	FR42	Alsace	11.5872	0	6.62526	36.211	48.4734	65.2769	18.9487	19.5124	19.5124	19.5124	19.5124		19521.2	17259.2	17259.2	16115.7	11009.5	8893.08	5992.93	13988.8	12971.2	8861.26	7157.83	4823.57		17259.2	36.211	48.4734	65.2769	BioE_COM-S	36.211	11009.5	6249.73	36.211
FR	FR43	Franche-ComtÚ	11.2909	0	7.55678	76.4708	100	100	21.3173	22.3645	22.3645	0	0		3088.88	2740.12	2740.12	2533.05	644.728	0	0	2156	1966.55	500.537	0	0		2740.12	76.4708	100	100	BioE_COM-S	76.4708	644.728	2095.39	76.4708
FR	FR51	Pays de la Loire	10.8873	0	0.472773	30.3391	49.8622	44.0999	11.1921	11.1979	11.1979	11.1979	11.1979		59668.4	53172.1	53172.1	52920.7	37040.2	26659.3	29723.2	47221	46994.7	32892.5	23674.1	26394.9		53172.1	30.3391	49.8622	44.0999	BioE_COM-S	30.3391	37040.2	16131.9	30.3391
FR	FR52	Bretagne	9	0	2.90909	2.90909	100	100	15.4845	15.5674	15.5674	0	0		5245.1	4773.04	4773.04	4634.19	4634.19	0	0	4033.96	3912.77	3912.77	0	0		4773.04	2.90909	100	100	BioE_COM-S	2.90909	4634.19	138.852	2.90909
FR	FR53	Poitou-Charentes	11.8666	0	0.451763	14.7205	24.1101	13.1487	11.2224	11.2297	11.2297	11.2297	11.2297		91856	80955.8	80955.8	80590.1	69038.7	61437.3	70311.1	71870.6	71540	61285.9	54538.1	62415.4		80955.8	14.7205	24.1101	13.1487	BioE_COM-L	13.1487	70311.1	10644.6	13.1487
FR	FR61	Aquitaine	11.2657	0	0.858981	6.4384	10.7795	7.12208	14.3018	14.3293	14.3293	14.3293	14.3293		213308	189277	189277	187651	177091	168874	175797	162207	160762	151715	144676	150606		189277	6.4384	10.7795	7.12208	BioE_COM-S	6.4384	177091	12186.4	6.4384
FR	FR62	Midi-PyrÚnÚes	10.6961	0	0.689852	16.97	36.057	24.5692	9.19509	9.22671	9.22671	9.22671	9.22671		74900.5	66889.1	66889.1	66427.7	55538	42770.9	50455	60738.6	60298.6	50413.7	38824.5	45799.7		66889.1	16.97	36.057	24.5692	BioE_COM-S	16.97	55538	11351.1	16.97
FR	FR63	Limousin	9.20785	0	1.09657	40.7133	76.7286	100	10.1229	10.2155	10.2155	10.2155	0		6955.12	6314.7	6314.7	6245.46	3743.77	1469.52	0	5675.47	5607.45	3361.33	1319.4	0		6314.7	40.7133	76.7286	100	BioE_COM-S	40.7133	3743.77	2570.93	40.7133
FR	FR71	Rh¶ne-Alpes	11.2836	0	2.03037	17.598	35.2303	31.6743	13.7665	13.8792	13.8792	13.8792	13.8792		112592	99887.4	99887.4	97859.3	82309.2	64696.7	68248.8	86136.4	84277.3	70885.4	55717.4	58776.4		99887.4	17.598	35.2303	31.6743	BioE_COM-S	17.598	82309.2	17578.2	17.598
FR	FR72	Auvergne	11.2304	0	4.99504	100	100	100	15.8787	16.2894	0	0	0		1643.96	1459.34	1459.34	1386.44	0	0	0	1227.61	1160.6	0	0	0		1459.34	100	100	100		100	0	1459.34	100
FR	FR81	Languedoc-Roussillon	11.6616	0	2.09673	6.76261	10.7727	4.5124	15.2853	15.4045	15.4045	15.4045	15.4045		331796	293103	293103	286957	273282	261528	279877	248301	242753	231184	221241	236763		293103	6.76261	10.7727	4.5124	BioE_COM-L	4.5124	279877	13226	4.5124
FR	FR82	Provence-Alpes-C¶te d'Azur	10.6909	0	2.77164	15.7149	30.1341	22.4933	15.017	15.2284	15.2284	15.2284	15.2284		169273	151176	151176	146986	127419	105621	117172	128474	124602	108015	89536.3	99328.2		151176	15.7149	30.1341	22.4933	BioE_COM-S	15.7149	127419	23757.2	15.7149
FR	FR83	Corse	10.3797	0	0.9614	36.1989	70.2608	100	18.6718	18.8111	18.8111	18.8111	0		17504.7	15687.7	15687.7	15536.9	10008.9	4665.41	0	12758.6	12614.3	8126.15	3787.8	0		15687.7	36.1989	70.2608	100	BioE_COM-S	36.1989	10008.9	5678.8	36.1989
FR	FRA1	Guadeloupe	9.72673	0	7.19203	40.2127	72.1317	100	0.668533	0.623658	0.623658	0.623658	0		10513.3	9490.67	9490.67	8808.1	5674.21	2644.89	0	9427.23	8753.17	5638.83	2628.4	0		9490.67	40.2127	72.1317	100	BioE_COM-S	40.2127	5674.21	3816.46	40.2127
FR	FRA2	Martinique	9.62316	0	1.79487	36.7359	70.511	100	0.435992	0.428251	0.428251	0.428251	0		21416.4	19355.4	19355.4	19008	12245.1	5707.72	0	19271.1	18926.6	12192.6	5683.28	0		19355.4	36.7359	70.511	100	BioE_COM-S	36.7359	12245.1	7110.39	36.7359
FR	FRA3	Guyane	10.1495	0	16.0547	45.9221	74.7929	100	1.62322	1.67965	1.67965	1.67965	0		9572.31	8600.77	8600.77	7219.95	4651.12	2168	0	8461.17	7098.68	4573	2131.59	0		8600.77	45.9221	74.7929	100	BioE_COM-S	45.9221	4651.12	3949.65	45.9221
FR	FRA4	RÚunion	9.72327	0	19.4445	48.1058	75.8108	100	1.00693	1.06655	1.06655	1.06655	0		8336.55	7525.97	7525.97	6062.58	3905.54	1820.47	0	7450.18	5997.92	3863.88	1801.05	0		7525.97	48.1058	75.8108	100	BioE_COM-S	48.1058	3905.54	3620.43	48.1058
HR	HR03	Jadranska Hrvatska	12.6224	0	47.017	74.651	95.8075	100	16.4777	20.2532	20.2532	20.2532	0		49067.2	42873.8	42873.8	22715.8	10868.1	1797.49	0	35809.2	18115.1	8666.95	1433.44	0		42873.8	74.651	95.8075	100	BioE_COM-S	74.651	10868.1	32005.7	74.651
HR	HR04	Kontinentalna Hrvatska	9.81277	0	21.0554	36.5592	84.71	100	14.6068	15.0145	15.0145	15.0145	0		68734.3	61989.6	61989.6	48937.5	39326.7	9478.18	0	52934.9	41589.8	33422	8055.08	0		61989.6	36.5592	84.71	100	BioE_COM-S	36.5592	39326.7	22662.9	36.5592
HU	HU10	Közép-Magyarország	9.34975	0	10.3136	58.0608	99.516	100	5.23733	5.7062	5.7062	5.7062	0		21100.3	19127.5	19127.5	17154.8	8021.91	92.5783	0	18125.7	16175.9	7564.17	87.2956	0		19127.5	58.0608	99.516	100	BioE_COM-S	58.0608	8021.91	11105.6	58.0608
HU	HU21	Közép-Dunántúl	10.4418	0	24.0234	91.3841	100	100	7.48444	9.02125	9.02125	0	0		16675.8	14934.5	14934.5	11346.7	1286.74	0	0	13816.7	10323.1	1170.66	0	0		14934.5	91.3841	100	100	BioE_COM-S	91.3841	1286.74	13647.8	91.3841
HU	HU22	Nyugat-Dunántúl	9.89823	0	33.941	95.1103	100	100	10.7092	15.3817	15.3817	0	0		16357.2	14738.2	14738.2	9735.88	720.646	0	0	13159.8	8238.34	609.798	0	0		14738.2	95.1103	100	100	BioE_COM-S	95.1103	720.646	14017.5	95.1103
HU	HU23	Dél-Dunántúl	10.4735	0	25.3208	78.0336	99.9555	100	6.3953	7.91523	7.91523	7.91523	0		24487.2	21922.5	21922.5	16371.6	4815.59	9.75804	0	20520.5	15075.7	4434.43	8.98567	0		21922.5	78.0336	99.9555	100	BioE_COM-S	78.0336	4815.59	17106.9	78.0336
HU	HU31	Észak-Magyarország	10.1585	0	21.529	51.6264	93.0818	99.5676	6.71627	8.03513	8.03513	8.03513	8.03513		42359	38056	38056	29862.9	18409.1	2632.8	164.55	35500	27463.4	16929.9	2421.25	151.328		38056	51.6264	93.0818	99.5676	BioE_COM-S	51.6264	18409.1	19646.9	51.6264
HU	HU32	Észak-Alföld	9.08309	0	15.491	37.261	52.0352	37.5591	5.306	6.24037	6.24037	6.24037	6.24037		85734.1	77946.8	77946.8	65872	48903	37387	48670.6	73810.9	61761.3	45851.3	35053.9	45633.4		77946.8	37.261	52.0352	37.5591	BioE_COM-S	37.261	48903	29043.8	37.261
HU	HU33	Dél-Alföld	10.1417	0	11.4665	39.9046	63.1149	50.2603	3.93736	4.25652	4.25652	4.25652	4.25652		50305.3	45203.4	45203.4	40020.2	27165.2	16673.3	22484.1	43423.6	38316.7	26008.9	15963.6	21527		45203.4	39.9046	63.1149	50.2603	BioE_COM-S	39.9046	27165.2	18038.2	39.9046
IE	IE01	Border, Midland and Western	9	0	0	32.1212	58.3377	43.8182	1	1	1	1	1		150	136.5	136.5	136.5	92.6545	56.8691	76.6882	135.135	135.135	91.728	56.3004	75.9213		136.5	32.1212	58.3377	43.8182	BioE_COM-S	32.1212	92.6545	43.8455	32.1212
IE	IE02	Southern and Eastern	9	0	0	32.1212	58.3377	43.8182	1	1	1	1	1		795	723.45	723.45	723.45	491.069	301.406	406.447	716.216	716.216	486.158	298.392	402.383		723.45	32.1212	58.3377	43.8182	BioE_COM-S	32.1212	491.069	232.381	32.1212
IT	ITC1	Piemonte	10.5733	0	7.99596	13.4448	17.7704	19.5795	26.5504	26.7509	26.7509	26.7509	26.7509		122472	109523	109523	100765	94797.4	90059.9	88078.6	80443.8	73809.5	69438.2	65968.1	64516.7		109523	13.4448	17.7704	19.5795	BioE_COM-S	13.4448	94797.4	14725.1	13.4448
IT	ITC2	Valle d'Aosta/VallÚe d'Aoste	31.7466	0	49.3945	100	100	100	20.7977	22.7263	0	0	0		836.334	570.826	570.826	288.869	0	0	0	452.107	223.22	0	0	0		570.826	100	100	100		100	0	570.826	100
IT	ITC3	Liguria	10.6895	0	54.611	73.2402	78.5608	78.8889	12.5965	18.2531	18.2531	18.2531	18.2531		16620.3	14843.7	14843.7	6737.38	3972.13	3182.36	3133.66	12973.9	5507.6	3247.09	2601.48	2561.67		14843.7	73.2402	78.5608	78.8889	BioE_COM-S	73.2402	3972.13	10871.5	73.2402
IT	ITC4	Lombardia	14.6774	0	9.69824	21.8408	33.2385	28.9954	25.5963	26.191	26.191	26.191	26.191		42895.2	36599.3	36599.3	33049.8	28605.7	24434.2	25987.2	27231.2	24393.7	21113.6	18034.7	19180.9		36599.3	21.8408	33.2385	28.9954	BioE_COM-S	21.8408	28605.7	7993.58	21.8408
IT	ITF1	Abruzzo	8.56407	0	25.8866	32.7566	38.2864	34.6434	20.5011	24.508	24.508	24.508	24.508		93895.9	85854.6	85854.6	63629.7	57731.5	52983.9	56111.6	68253.5	48035.3	43582.7	39998.6	42359.8		85854.6	32.7566	38.2864	34.6434	BioE_COM-S	32.7566	57731.5	28123.1	32.7566
IT	ITF2	Molise	6.87424	0	22.9837	33.8145	45.7076	42.0588	14.8051	17.1279	17.1279	17.1279	17.1279		26333.6	24523.4	24523.4	18887	16230.9	13314.3	14209.1	20892.6	15652	13450.9	11033.9	11775.4		24523.4	33.8145	45.7076	42.0588	BioE_COM-S	33.8145	16230.9	8292.46	33.8145
IT	ITF3	Campania	9.97672	0	28.9014	36.8978	43.4396	35.9084	18.3148	21.7056	21.7056	21.7056	21.7056		199162	179292	179292	127474	113137	101408	114911	146455	99805	88580.1	79396.9	89969		179292	36.8978	43.4396	35.9084	BioE_COM-L	35.9084	114911	64380.7	35.9084
IT	ITF4	Puglia	6.46886	0	24.4345	25.9077	27.9357	26.9677	19.8689	23.8632	23.8632	23.8632	23.8632		686764	642338	642338	485386	475923	462896	469114	514713	369557	362352	352434	357169		642338	25.9077	27.9357	26.9677	BioE_COM-S	25.9077	475923	166415	25.9077
IT	ITF5	Basilicata	7.49559	0	18.8332	40.5087	53.5804	38.0131	25.1321	29.2457	29.2457	29.2457	29.2457		74119.1	68563.4	68563.4	55650.7	40789.3	31826.8	42500.3	51332	39375.3	28860.2	22518.9	30070.8		68563.4	40.5087	53.5804	38.0131	BioE_COM-L	38.0131	42500.3	26063.1	38.0131
IT	ITF6	Calabria	6.79955	0	25.1369	28.2482	30.5218	27.9621	27.8426	35.2285	35.2285	35.2285	35.2285		338611	315587	315587	236258	226439	219264	227342	227720	153028	146668	142021	147253		315587	28.2482	30.5218	27.9621	BioE_COM-L	27.9621	227342	88244.9	27.9621
IT	ITG1	Sicilia	9.87544	0	20.1492	38.6628	49.6416	37.9426	24.3736	28.5622	28.5622	28.5622	28.5622		494955	446076	446076	356196	273611	224637	276823	337351	254458	195462	160476	197757		446076	38.6628	49.6416	37.9426	BioE_COM-L	37.9426	276823	169253	37.9426
IT	ITG2	Sardegna	7.20931	0	23.5204	47.2355	69.8838	79.5669	16.364	18.3203	18.3203	18.3203	18.3203		80697.7	74879.9	74879.9	57267.9	39510	22551	15300.3	62626.6	46776.3	32271.7	18419.6	12497.2		74879.9	47.2355	69.8838	79.5669	BioE_COM-S	47.2355	39510	35369.9	47.2355
IT	ITH1	Provincia Autonoma Bolzano/Bozen	26.4084	0	13.4891	15.745	18.0009	21.9881	11.5901	11.6798	11.6798	11.6798	11.6798		36409.2	26794.1	26794.1	23179.8	22575.4	21970.9	20902.6	23688.6	20472.4	19938.6	19404.7	18461.2		26794.1	15.745	18.0009	21.9881	BioE_COM-S	15.745	22575.4	4218.73	15.745
IT	ITH2	Provincia Autonoma Trento	25.6263	0	25.2782	36.8058	42.4703	35.2724	13.0783	12.8194	12.8194	12.8194	12.8194		33642.5	25021.2	25021.2	18696.3	15811.9	14394.6	16195.6	21748.8	16299.5	13784.9	12549.3	14119.4		25021.2	36.8058	42.4703	35.2724	BioE_COM-L	35.2724	16195.6	8825.56	35.2724
IT	ITH3	Veneto	13.3816	0	9.50471	15.8689	20.0701	18.3571	22.6589	22.6654	22.6654	22.6654	22.6654		166401	144134	144134	130435	121262	115206	117675	111475	100871	93777.3	89094.3	91003.8		144134	15.8689	20.0701	18.3571	BioE_COM-S	15.8689	121262	22872.4	15.8689
IT	ITH4	Friuli-Venezia Giulia	11.2048	0	3.7283	23.4664	40.6994	50.59	26.2685	26.2787	26.2787	26.2787	26.2787		29138.4	25873.5	25873.5	24908.9	19801.9	15343.2	12784.1	19076.9	18363.1	14598.2	11311.2	9424.6		25873.5	23.4664	40.6994	50.59	BioE_COM-S	23.4664	19801.9	6071.58	23.4664
IT	ITH5	Emilia-Romagna	9.77521	0	3.69821	20.2398	31.7502	27.5323	13.063	12.985	12.985	12.985	12.985		242365	218673	218673	210586	174414	149244	158468	190108	183242	151767	129865	137891		218673	20.2398	31.7502	27.5323	BioE_COM-S	20.2398	174414	44259	20.2398
IT	ITI1	Toscana	7.71584	0	11.2609	23.966	38.3098	30.1701	22.6435	24.2157	24.2157	24.2157	24.2157		199159	183792	183792	163096	139744	113382	128342	142175	123601	105904	85925.5	97262.9		183792	23.966	38.3098	30.1701	BioE_COM-S	23.966	139744	44047.6	23.966
IT	ITI2	Umbria	8.92261	0	17.0398	35.3345	71.5375	61.0679	23.0528	26.0188	26.0188	26.0188	26.0188		52391.9	47717.2	47717.2	39586.3	30856.5	13581.5	18577.3	36717	29286.4	22828	10047.7	13743.7		47717.2	35.3345	71.5375	61.0679	BioE_COM-S	35.3345	30856.5	16860.6	35.3345
IT	ITI3	Marche	8.51992	0	11.376	68.5877	89.3651	93.9933	28.3173	30.449	30.449	30.449	30.449		44157.3	40395.1	40395.1	35799.8	12689	4295.97	2426.43	28956.3	24899.1	8825.34	2987.89	1687.6		40395.1	68.5877	89.3651	93.9933	BioE_COM-S	68.5877	12689	27706.1	68.5877
IT	ITI4	Lazio	9.40773	0	28.3005	38.3314	53.306	50.0597	23.9954	30.0182	30.0182	30.0182	30.0182		152322	137992	137992	98939.5	85097.7	64434	68913.7	104880	69239.7	59552.9	45092.1	48227		137992	38.3314	53.306	50.0597	BioE_COM-S	38.3314	85097.7	52894.3	38.3314
LT	LT00	Lietuva	9.00356	0	8.77026	47.0962	100	100	43.2701	46.8862	46.8862	0	0		20695.1	18831.8	18831.8	17180.2	9962.74	0	0	10683.3	9125.06	5291.59	0	0		18831.8	47.0962	100	100	BioE_COM-S	47.0962	9962.74	8869.05	47.0962
LU	LU00	Luxembourg	11.5969	0	6.78488	100	100	100	12.3461	12.4804	0	0	0		1544.9	1365.74	1365.74	1273.08	0	0	0	1197.13	1114.19	0	0	0		1365.74	100	100	100		100	0	1365.74	100
LV	LV00	Latvija	9	0	0.622084	72.5205	100	100	13.8538	13.9155	13.9155	0	0		9679.42	8808.27	8808.27	8753.48	2420.47	0	0	7587.99	7535.39	2083.65	0	0		8808.27	72.5205	100	100	BioE_COM-S	72.5205	2420.47	6387.81	72.5205
MT	MT00	Malta	9.88321	0	44.2768	100	100	100	11.9397	13.3252	0	0	0		2499.07	2252.08	2252.08	1254.93	0	0	0	1983.19	1087.71	0	0	0		2252.08	100	100	100		100	0	2252.08	100
NL	NL11	Groningen	9	0	0	100	100	100	1	1	0	0	0		63.2083	57.5195	57.5195	57.5195	0	0	0	56.9443	56.9443	0	0	0		57.5195	100	100	100		100	0	57.5195	100
NL	NL12	Friesland (NL)	9	0	0	100	100	100	1	1	0	0	0		75.3433	68.5624	68.5624	68.5624	0	0	0	67.8768	67.8768	0	0	0		68.5624	100	100	100		100	0	68.5624	100
NL	NL13	Drenthe	9	0	0	100	100	100	1	1	0	0	0		15.3323	13.9524	13.9524	13.9524	0	0	0	13.8129	13.8129	0	0	0		13.9524	100	100	100		100	0	13.9524	100
NL	NL21	Overijssel	9	0	0	100	100	100	1	1	0	0	0		107.761	98.0627	98.0627	98.0627	0	0	0	97.082	97.082	0	0	0		98.0627	100	100	100		100	0	98.0627	100
NL	NL22	Gelderland	9.00786	0	2.57283	46.1793	74.4647	100	2.19142	2.22289	2.22289	2.22289	0		8036.36	7312.45	7312.45	7124.31	3935.61	1867.26	0	7152.2	6965.95	3848.13	1825.75	0		7312.45	46.1793	74.4647	100	BioE_COM-S	46.1793	3935.61	3376.84	46.1793
NL	NL23	Flevoland	9	0	0	69.4184	100	100	7.31915	7.31915	7.31915	0	0		2165.85	1970.92	1970.92	1970.92	602.739	0	0	1826.66	1826.66	558.623	0	0		1970.92	69.4184	100	100	BioE_COM-S	69.4184	602.739	1368.18	69.4184
NL	NL31	Utrecht	9	0	1.59574	20.2128	100	100	2.57979	2.60541	2.60541	0	0		3019.48	2747.72	2747.72	2703.88	2192.33	0	0	2676.84	2633.43	2135.21	0	0		2747.72	20.2128	100	100	BioE_COM-S	20.2128	2192.33	555.391	20.2128
NL	NL32	Noord-Holland	9	0	1.17647	15.128	100	100	3.32941	3.35714	3.35714	0	0		1312.46	1194.34	1194.34	1180.29	1013.66	0	0	1154.57	1140.66	979.627	0	0		1194.34	15.128	100	100	BioE_COM-S	15.128	1013.66	180.68	15.128
NL	NL33	Zuid-Holland	9	0	1.9802	8.10644	100	100	1	1	1	0	0		1563.15	1422.47	1422.47	1394.3	1307.16	0	0	1408.24	1380.36	1294.09	0	0		1422.47	8.10644	100	100	BioE_COM-S	8.10644	1307.16	115.312	8.10644
NL	NL34	Zeeland	9.34211	0	0.753769	47.392	100	100	1	1	1	0	0		7951.14	7208.34	7208.34	7154	3792.16	0	0	7136.25	7082.46	3754.24	0	0		7208.34	47.392	100	100	BioE_COM-S	47.392	3792.16	3416.18	47.392
NL	NL41	Noord-Brabant	9.0052	0	0.77723	100	100	100	4.84472	4.87483	0	0	0		2327.01	2117.46	2117.46	2101	0	0	0	2014.88	1998.58	0	0	0		2117.46	100	100	100		100	0	2117.46	100
NL	NL42	Limburg (NL)	9.02976	0	0.966249	8.74747	100	100	2.49485	2.50943	2.50943	0	0		4246.5	3863.05	3863.05	3825.73	3525.13	0	0	3766.67	3729.72	3436.67	0	0		3863.05	8.74747	100	100	BioE_COM-S	8.74747	3525.13	337.919	8.74747
PL	PL11	Lodzkie	9.00469	0	3.66264	9.19484	12.097	21.8237	8.87527	9.02426	9.02426	9.02426	9.02426		68067.1	61937.9	61937.9	59669.3	56242.8	54445.3	48420.8	56440.7	54284.6	51167.3	49532	44051.2		61937.9	9.19484	12.097	21.8237	BioE_COM-S	9.19484	56242.8	5695.09	9.19484
PL	PL12	Mazowieckie	9.00472	0	4.04668	7.26904	10.8614	10.6166	7.47565	7.61054	7.61054	7.61054	7.61054		209421	190564	190564	182852	176711	169866	170332	176318	168936	163263	156938	157369		190564	7.26904	10.8614	10.6166	BioE_COM-S	7.26904	176711	13852.1	7.26904
PL	PL21	Malopolskie	9.02408	0	15.8932	30.8899	65.8824	100	17.0221	19.1576	19.1576	19.1576	0		22085	20092	20092	16898.8	13885.6	6854.93	0	16672	13661.4	11225.5	5541.69	0		20092	30.8899	65.8824	100	BioE_COM-S	30.8899	13885.6	6206.42	30.8899
PL	PL22	Slaskie	9.03641	0	18.5781	39.7349	100	100	10.3817	11.8329	11.8329	0	0		3825.94	3480.21	3480.21	2833.65	2097.35	0	0	3118.9	2498.35	1849.17	0	0		3480.21	39.7349	100	100	BioE_COM-S	39.7349	2097.35	1382.86	39.7349
PL	PL31	Lubelskie	9.04754	0	6.26721	14.7486	22.5569	26.562	22.4768	23.4917	23.4917	23.4917	23.4917		65404.8	59487.3	59487.3	55759.1	50713.8	46068.8	43686.3	46116.5	42660.4	38800.3	35246.5	33423.7		59487.3	14.7486	22.5569	26.562	BioE_COM-S	14.7486	50713.8	8773.55	14.7486
PL	PL32	Podkarpackie	9.12194	0	24.1444	61.1407	96.2738	93.6122	45.6358	57.5273	57.5273	57.5273	57.5273		12888.3	11712.7	11712.7	8884.72	4551.47	436.442	748.187	6367.5	3773.58	1933.13	185.369	317.775		11712.7	61.1407	96.2738	93.6122	BioE_COM-S	61.1407	4551.47	7161.21	61.1407
PL	PL33	Swietokrzyskie	9.00997	0	9.14033	11.863	15.4219	18.5919	8.57206	8.92072	8.92072	8.92072	8.92072		66486.1	60495.7	60495.7	54966.2	53319.1	51166.1	49248.4	55310	50062.8	48562.6	46601.7	44855.1		60495.7	11.863	15.4219	18.5919	BioE_COM-S	11.863	53319.1	7176.61	11.863
PL	PL34	Podlaskie	9.07651	0	4.43971	51.6948	100	100	63.7455	66.1158	66.1158	0	0		4808.71	4372.25	4372.25	4178.13	2112.02	0	0	1585.14	1415.73	715.643	0	0		4372.25	51.6948	100	100	BioE_COM-S	51.6948	2112.02	2260.23	51.6948
PL	PL41	Wielkopolskie	9.06809	0	4.8943	10.114	27.7688	58.1658	29.069	30.2943	30.2943	30.2943	30.2943		39308.9	35744.4	35744.4	33994.9	32129.2	25818.6	14953.4	25353.8	23696.4	22395.9	17997	10423.4		35744.4	10.114	27.7688	58.1658	BioE_COM-S	10.114	32129.2	3615.18	10.114
PL	PL42	Zachodniopomorskie	9.94577	0	1.23352	10.1798	100	100	72.813	72.5201	72.5201	0	0		33450.2	30123.3	30123.3	29751.7	27056.8	0	0	8189.61	8175.75	7435.19	0	0		30123.3	10.1798	100	100	BioE_COM-S	10.1798	27056.8	3066.48	10.1798
PL	PL43	Lubuskie	9.18854	0	2.88415	19.0117	100	100	82.5865	82.143	82.143	0	0		11802.6	10718.1	10718.1	10409	8680.44	0	0	1866.41	1858.74	1550.07	0	0		10718.1	19.0117	100	100	BioE_COM-S	19.0117	8680.44	2037.7	19.0117
PL	PL51	Dolnoslaskie	9.12629	0	7.70823	28.9564	77.292	100	43.5266	46.6157	46.6157	46.6157	0		9707.07	8821.17	8821.17	8141.22	6266.88	2003.11	0	4981.62	4346.14	3345.53	1069.35	0		8821.17	28.9564	77.292	100	BioE_COM-S	28.9564	6266.88	2554.3	28.9564
PL	PL52	Opolskie	9.01677	0	7.96986	50.2132	100	100	37.9301	40.8649	40.8649	0	0		2415.18	2197.41	2197.41	2022.28	1094.02	0	0	1363.93	1195.88	646.95	0	0		2197.41	50.2132	100	100	BioE_COM-S	50.2132	1094.02	1103.39	50.2132
PL	PL61	Kujawsko-Pomorskie	9.0549	0	5.47324	46.3598	100	100	23.6719	24.8098	24.8098	0	0		15270.1	13887.4	13887.4	13127.3	7449.24	0	0	10600	9870.47	5601.1	0	0		13887.4	46.3598	100	100	BioE_COM-S	46.3598	7449.24	6438.18	46.3598
PL	PL62	Warminsko-Mazurskie	9.1713	0	2.20637	2.20637	100	100	85.3731	85.108	85.108	0	0		10650.2	9673.4	9673.4	9459.97	9459.97	0	0	1414.92	1408.78	1408.78	0	0		9673.4	2.20637	100	100	BioE_COM-S	2.20637	9459.97	213.431	2.20637
PL	PL63	Pomorskie	9.03448	0	2.94589	29.1083	100	100	39.4293	40.2469	40.2469	0	0		6738	6129.26	6129.26	5948.7	4345.14	0	0	3712.54	3554.53	2596.35	0	0		6129.26	29.1083	100	100	BioE_COM-S	29.1083	4345.14	1784.12	29.1083
PT	PT11	Norte	9.29586	0	11.9464	19.3723	25.5425	18.3825	6.52984	7.03097	7.03097	7.03097	7.03097		250458	227176	227176	200037	183167	169150	185415	212342	185972	170288	157257	172379		227176	19.3723	25.5425	18.3825	BioE_COM-L	18.3825	185415	41760.7	18.3825
PT	PT15	Algarve	8.89942	0	9.76528	18.07	31.1664	29.1852	3.99066	4.0629	4.0629	4.0629	4.0629		49454.9	45053.7	45053.7	40654.1	36912.5	31012.1	31904.7	43255.8	39002.4	35412.8	29752.1	30608.4		45053.7	18.07	31.1664	29.1852	BioE_COM-S	18.07	36912.5	8141.21	18.07
PT	PT16	Centro (P)	8.07655	0	18.9482	43.3973	64.5327	47.2045	5.16516	5.58452	5.58452	5.58452	5.58452		132208	121530	121530	98502	68789.1	43103.4	64162.2	115253	93001.2	64947.6	40696.3	60579.1		121530	43.3973	64.5327	47.2045	BioE_COM-S	43.3973	68789.1	52740.6	43.3973
PT	PT17	Centro (P)	7.65934	0	11.6238	31.1935	48.6686	61.7672	3.06857	3.10404	3.10404	3.10404	3.10404		20672.5	19089.1	19089.1	16870.3	13134.6	9798.72	7298.31	18503.4	16346.6	12726.9	9494.56	7071.77		19089.1	31.1935	48.6686	61.7672	BioE_COM-S	31.1935	13134.6	5954.57	31.1935
PT	PT18	Centro (P)	6.84897	0	3.75316	25.1609	43.0854	25.2509	5.94672	6.02143	6.02143	6.02143	6.02143		221177	206029	206029	198296	154190	117260	154005	193777	186356	144906	110200	144731		206029	25.1609	43.0854	25.2509	BioE_COM-S	25.1609	154190	51838.7	25.1609
PT	PT20	RegiÒo Aut¾noma dos Aþores	12.97	0	48.5596	100	100	100	2.26193	2.08474	0	0	0		3566.7	3104.1	3104.1	1596.76	0	0	0	3033.89	1563.47	0	0	0		3104.1	100	100	100		100	0	3104.1	100
PT	PT30	RegiÒo Aut¾noma da Madeira	32.6583	0	88.5549	95.386	100	100	3.31407	12.8847	12.8847	0	0		5201.28	3502.63	3502.63	400.879	161.611	0	0	3386.55	349.227	140.788	0	0		3502.63	95.386	100	100	BioE_COM-S	95.386	161.611	3341.02	95.386
RO	RO11	Nord-Vest	9.22032	0	23.8344	72.6622	88.8905	92.439	5	5	5	5	5		73859.2	67049.2	67049.2	51068.4	18329.8	7448.83	5069.58	63696.7	48515	17413.3	7076.39	4816.1		67049.2	72.6622	88.8905	92.439	BioE_COM-S	72.6622	18329.8	48719.4	72.6622
RO	RO12	Centru	9.78959	0	12.1235	93.5362	100	100	8.97989	9.52895	9.52895	0	0		24153.1	21788.6	21788.6	19147.1	1408.38	0	0	19832	17322.6	1274.18	0	0		21788.6	93.5362	100	100	BioE_COM-S	93.5362	1408.38	20380.3	93.5362
RO	RO21	Nord-Est	10.5527	0	30.4894	85.2263	100	100	5	5	5	0	0		60268.2	53908.3	53908.3	37472	7964.27	0	0	51212.9	35598.4	7566.06	0	0		53908.3	85.2263	100	100	BioE_COM-S	85.2263	7964.27	45944.1	85.2263
RO	RO22	Sud-Est	11.1541	0	32.7867	64.036	83.79	73.7813	5	5	5	5	5		91237.5	81060.8	81060.8	54483.6	29152.7	13139.9	21253.1	77007.8	51759.4	27695.1	12482.9	20190.5		81060.8	64.036	83.79	73.7813	BioE_COM-S	64.036	29152.7	51908.1	64.036
RO	RO31	Sud - Muntenia	9.66549	0	47.6639	70.6077	76.0641	70.3498	5	5	5	5	5		116815	105525	105525	55227.5	31016.1	25258.2	31288.3	100248	52466.1	29465.3	23995.3	29723.9		105525	70.6077	76.0641	70.3498	BioE_COM-L	70.3498	31288.3	74236.4	70.3498
RO	RO32	Bucuresti - Ilfov	9.74765	0	30.2	100	100	100	5	5	0	0	0		2125.46	1918.27	1918.27	1338.96	0	0	0	1822.36	1272.01	0	0	0		1918.27	100	100	100		100	0	1918.27	100
RO	RO41	Sud-Vest Oltenia	10.0978	0	33.9722	81.083	88.9753	86.6847	5	5	5	5	5		87170.2	78368	78368	51744.6	14824.9	8639.85	10434.9	74449.6	49157.4	14083.6	8207.86	9913.15		78368	81.083	88.9753	86.6847	BioE_COM-S	81.083	14824.9	63543.1	81.083
RO	RO42	Vest	9.43674	0	5.55133	66.8601	89.8997	93.9715	5	5	5	5	5		52355.3	47414.7	47414.7	44782.6	15713.2	4789.03	2858.4	45044	42543.4	14927.5	4549.58	2715.48		47414.7	66.8601	89.8997	93.9715	BioE_COM-S	66.8601	15713.2	31701.5	66.8601
SE	SE11	Stockholm	9	0	0	100	100	100	50.5	50.5	0	0	0		30	27.3	27.3	27.3	0	0	0	13.5135	13.5135	0	0	0		27.3	100	100	100		100	0	27.3	100
SE	SE12	Ostra Mellansverige	9	0	0	100	100	100	25.75	25.75	0	0	0		45	40.95	40.95	40.95	0	0	0	30.4054	30.4054	0	0	0		40.95	100	100	100		100	0	40.95	100
SE	SE21	SmÕland med oarna	9	0	0	100	100	100	19	19	0	0	0		180	163.8	163.8	163.8	0	0	0	132.678	132.678	0	0	0		163.8	100	100	100		100	0	163.8	100
SE	SE22	Sydsverige	9.25779	0	0.636943	46.7999	100	100	5.41401	5.44231	5.44231	0	0		2409.23	2186.18	2186.18	2172.26	1163.05	0	0	2067.82	2054.04	1099.75	0	0		2186.18	46.7999	100	100	BioE_COM-S	46.7999	1163.05	1023.13	46.7999
SE	SE23	Võstsverige	9	0	0	100	100	100	34	34	0	0	0		180.219	163.999	163.999	163.999	0	0	0	108.24	108.24	0	0	0		163.999	100	100	100		100	0	163.999	100
SE	SE31	Norra Mellansverige	0	0	0	0	0	0	0	0	0	0	0		0	0	0	0	0	0	0	0	0	0	0	0		0	0	0	0		0	0	0	0
SE	SE32	Mellersta Norrland	0	0	0	0	0	0	0	0	0	0	0		0	0	0	0	0	0	0	0	0	0	0	0		0	0	0	0		0	0	0	0
SE	SE33	Ovre Norrland	0	0	0	0	0	0	0	0	0	0	0		0	0	0	0	0	0	0	0	0	0	0	0		0	0	0	0		0	0	0	0
SI	SI03	Vzhodna Slovenija	10.7536	0	13.3048	61.2614	91.404	100	13.2284	13.4919	13.4919	13.4919	0		26189.4	23373.1	23373.1	20263.3	9054.4	2009.15	0	20281.2	17529.4	7832.78	1738.08	0		23373.1	61.2614	91.404	100	BioE_COM-S	61.2614	9054.4	14318.7	61.2614
SI	SI04	Zahodna Slovenija	10.9773	0	21.4988	49.7783	66.4734	59.3865	15.64	16.7687	16.7687	16.7687	16.7687		12698.8	11304.9	11304.9	8874.45	5677.49	3790.13	4591.3	9536.78	7386.32	4725.45	3154.58	3821.4		11304.9	49.7783	66.4734	59.3865	BioE_COM-S	49.7783	5677.49	5627.37	49.7783
SK	SK01	Bratislavsky	11.3445	0	1.65637	63.2709	100	100	3.36398	3.42064	3.42064	0	0		3786.16	3356.64	3356.64	3301.04	1232.86	0	0	3243.72	3188.12	1190.69	0	0		3356.64	63.2709	100	100	BioE_COM-S	63.2709	1232.86	2123.77	63.2709
SK	SK02	Zapadne Slovensko	10.0791	0	1.27501	94.6159	100	100	16.5431	16.6324	16.6324	0	0		17946.7	16137.9	16137.9	15932.1	868.883	0	0	13468.2	13282.2	724.367	0	0		16137.9	94.6159	100	100	BioE_COM-S	94.6159	868.883	15269	94.6159
SK	SK03	Stredne Slovensko	10.3831	0	1.36555	100	100	100	27.1383	27.3794	0	0	0		2153.62	1930	1930	1903.65	0	0	0	1406.23	1382.44	0	0	0		1930	100	100	100		100	0	1930	100
SK	SK04	Vychodne Slovensko	10.3182	0	1.33996	99.7664	100	100	9.21344	9.23365	9.23365	0	0		3148.22	2823.38	2823.38	2785.55	6.59562	0	0	2563.25	2528.34	5.9866	0	0		2823.38	99.7664	100	100	BioE_COM-S	99.7664	6.59562	2816.79	99.7664
UK	UKC1	Tees Valley and Durham	0	0	0	0	0	0	0	0	0	0	0		0	0	0	0	0	0	0	0	0	0	0	0		0	0	0	0		0	0	0	0
UK	UKC2	Northumberland and Tyne and Wear	0	0	0	0	0	0	0	0	0	0	0		0	0	0	0	0	0	0	0	0	0	0	0		0	0	0	0		0	0	0	0
UK	UKD1	Cumbria	9.14365	0	0	99.7632	100	100	1	1	1	0	0		60	54.5138	54.5138	54.5138	0.129078	0	0	53.9687	53.9687	0.127787	0	0		54.5138	99.7632	100	100	BioE_COM-S	99.7632	0.129078	54.3847	99.7632
UK	UKD3	Greater Manchester	0	0	0	0	0	0	0	0	0	0	0		0	0	0	0	0	0	0	0	0	0	0	0		0	0	0	0		0	0	0	0
UK	UKD4	Lancashire	9.14365	0	0	99.7632	100	100	1	1	1	0	0		30	27.2569	27.2569	27.2569	0.0645388	0	0	26.9843	26.9843	0.0638935	0	0		27.2569	99.7632	100	100	BioE_COM-S	99.7632	0.0645388	27.1924	99.7632
UK	UKD6	Cheshire	0	0	0	0	0	0	0	0	0	0	0		0	0	0	0	0	0	0	0	0	0	0	0		0	0	0	0		0	0	0	0
UK	UKD7	Merseyside	0	0	0	0	0	0	0	0	0	0	0		0	0	0	0	0	0	0	0	0	0	0	0		0	0	0	0		0	0	0	0
UK	UKE1	East Yorkshire and Northern Lincolnshire	9.14365	0	0	99.7632	100	100	1	1	1	0	0		15	13.6285	13.6285	13.6285	0.0322694	0	0	13.4922	13.4922	0.0319467	0	0		13.6285	99.7632	100	100	BioE_COM-S	99.7632	0.0322694	13.5962	99.7632
UK	UKE2	North Yorkshire	9.14365	0	0	99.7632	100	100	1	1	1	0	0		45	40.8854	40.8854	40.8854	0.0968083	0	0	40.4765	40.4765	0.0958402	0	0		40.8854	99.7632	100	100	BioE_COM-S	99.7632	0.0968083	40.7886	99.7632
UK	UKE3	South Yorkshire	9.14365	0	0	99.7632	100	100	1	1	1	0	0		15	13.6285	13.6285	13.6285	0.0322694	0	0	13.4922	13.4922	0.0319467	0	0		13.6285	99.7632	100	100	BioE_COM-S	99.7632	0.0322694	13.5962	99.7632
UK	UKE4	West Yorkshire	0	0	0	0	0	0	0	0	0	0	0		0	0	0	0	0	0	0	0	0	0	0	0		0	0	0	0		0	0	0	0
UK	UKF1	Derbyshire and Nottinghamshire	9	0	0	100	100	100	1	1	0	0	0		75	68.25	68.25	68.25	0	0	0	67.5675	67.5675	0	0	0		68.25	100	100	100		100	0	68.25	100
UK	UKF2	Leicestershire, Rutland and Northamptonshire	9	0	0	100	100	100	1	1	0	0	0		105.325	95.8453	95.8453	95.8453	0	0	0	94.8868	94.8868	0	0	0		95.8453	100	100	100		100	0	95.8453	100
UK	UKF3	Lincolnshire	9	0	0	100	100	100	1	1	0	0	0		60.39	54.9549	54.9549	54.9549	0	0	0	54.4054	54.4054	0	0	0		54.9549	100	100	100		100	0	54.9549	100
UK	UKG1	Herefordshire, Worcestershire and Warwickshire	9.0173	0	0.165187	100	100	100	5.95902	5.96723	0	0	0		9131.05	8307.68	8307.68	8293.95	0	0	0	7812.62	7799.04	0	0	0		8307.68	100	100	100		100	0	8307.68	100
UK	UKG2	Shropshire and Staffordshire	9.31423	0	7.48631	100	100	100	1.96561	2.04374	0	0	0		201.06	182.333	182.333	168.683	0	0	0	178.749	165.235	0	0	0		182.333	100	100	100		100	0	182.333	100
UK	UKG3	West Midlands	0	0	0	0	0	0	0	0	0	0	0		0	0	0	0	0	0	0	0	0	0	0	0		0	0	0	0		0	0	0	0
UK	UKH1	East Anglia	9.04499	0	0.547494	100	100	100	8.72612	8.76865	0	0	0		2808.43	2554.41	2554.41	2540.42	0	0	0	2331.51	2317.66	0	0	0		2554.41	100	100	100		100	0	2554.41	100
UK	UKH2	Bedfordshire and Hertfordshire	9	0	0	100	100	100	1	1	0	0	0		155.032	141.079	141.079	141.079	0	0	0	139.668	139.668	0	0	0		141.079	100	100	100		100	0	141.079	100
UK	UKH3	Essex	9.33362	0	0	100	100	100	2.02538	2.02538	0	0	0		662.826	600.96	600.96	600.96	0	0	0	588.789	588.789	0	0	0		600.96	100	100	100		100	0	600.96	100
UK	UKI3	Inner London	0	0	0	0	0	0	0	0	0	0	0		0	0	0	0	0	0	0	0	0	0	0	0		0	0	0	0		0	0	0	0
UK	UKI4	Inner London	0	0	0	0	0	0	0	0	0	0	0		0	0	0	0	0	0	0	0	0	0	0	0		0	0	0	0		0	0	0	0
UK	UKI5	Outer London	0	0	0	0	0	0	0	0	0	0	0		0	0	0	0	0	0	0	0	0	0	0	0		0	0	0	0		0	0	0	0
UK	UKI6	Outer London	0	0	0	0	0	0	0	0	0	0	0		0	0	0	0	0	0	0	0	0	0	0	0		0	0	0	0		0	0	0	0
UK	UKI7	Outer London	0	0	0	0	0	0	0	0	0	0	0		0	0	0	0	0	0	0	0	0	0	0	0		0	0	0	0		0	0	0	0
UK	UKJ1	Berkshire, Buckinghamshire and Oxfordshire	9	0	0	100	100	100	1	1	0	0	0		92.0421	83.7583	83.7583	83.7583	0	0	0	82.9208	82.9208	0	0	0		83.7583	100	100	100		100	0	83.7583	100
UK	UKJ2	Berkshire, Buckinghamshire and Oxfordshire	9.72787	0	0	41.8605	100	100	16.1759	16.1759	16.1759	0	0		1909.62	1723.86	1723.86	1723.86	1002.24	0	0	1445.01	1445.01	840.121	0	0		1723.86	41.8605	100	100	BioE_COM-S	41.8605	1002.24	721.614	41.8605
UK	UKJ3	Hampshire and Isle of Wight	9.9624	0	0	100	100	100	3.97863	3.97863	0	0	0		699.157	629.504	629.504	629.504	0	0	0	604.458	604.458	0	0	0		629.504	100	100	100		100	0	629.504	100
UK	UKJ4	Hampshire and Isle of Wight	9	0	0.111359	0.111359	0.111359	0.111359	5.52004	5.52508	5.52508	5.52508	5.52508		14571.8	13260.3	13260.3	13245.6	13245.6	13245.6	13245.6	12528.4	12513.7	12513.7	12513.7	12513.7		13260.3	0.111359	0.111359	0.111359	BioE_COM-S & BioE_COM-M & BioE_COM-L	0.111359	13245.6	14.7665	0.111359
UK	UKK1	Gloucestershire, Wiltshire and Bristol/Bath area	9.10414	0	1.00666	1.00666	1.00666	1.00666	3.31245	3.33597	3.33597	3.33597	3.33597		1516.71	1378.63	1378.63	1364.75	1364.75	1364.75	1364.75	1332.96	1319.22	1319.22	1319.22	1319.22		1378.63	1.00666	1.00666	1.00666	BioE_COM-S & BioE_COM-M & BioE_COM-L	1.00666	1364.75	13.8781	1.00666
UK	UKK2	Dorset and Somerset	9.03407	0	0.810667	0.810667	100	100	5.91973	5.95994	5.95994	0	0		1854.5	1686.96	1686.96	1673.29	1673.29	0	0	1587.1	1573.56	1573.56	0	0		1686.96	0.810667	100	100	BioE_COM-S	0.810667	1673.29	13.6756	0.810667
UK	UKK3	Cornwall and Isles of Scilly	9.60137	0	0	0	100	100	8.54534	8.54534	8.54534	0	0		262.65	237.432	237.432	237.432	237.432	0	0	217.143	217.143	217.143	0	0		237.432	0	100	100	BioE_COM-S	0	237.432	0	0
UK	UKK4	Devon	9	0	1.44928	1.44928	100	100	12.4783	12.6471	12.6471	0	0		1020	928.2	928.2	914.748	914.748	0	0	812.377	799.059	799.059	0	0		928.2	1.44928	100	100	BioE_COM-S	1.44928	914.748	13.4522	1.44928
UK	UKL1	West Wales and The Valleys	18.8267	0	0	100	100	100	14.6709	14.6709	0	0	0		100.53	81.6035	81.6035	81.6035	0	0	0	69.6315	69.6315	0	0	0		81.6035	100	100	100		100	0	81.6035	100
UK	UKL2	East Wales	18.5455	0	0	100	100	100	1	1	0	0	0		525	427.636	427.636	427.636	0	0	0	423.36	423.36	0	0	0		427.636	100	100	100		100	0	427.636	100
UK	UKM2	Eastern Scotland	0	0	0	0	0	0	0	0	0	0	0		0	0	0	0	0	0	0	0	0	0	0	0		0	0	0	0		0	0	0	0
UK	UKM3	South Western Scotland	18.5455	0	0	100	100	100	1	1	0	0	0		15	12.2182	12.2182	12.2182	0	0	0	12.096	12.096	0	0	0		12.2182	100	100	100		100	0	12.2182	100
UK	UKM5	North Eastern Scotland	0	0	0	0	0	0	0	0	0	0	0		0	0	0	0	0	0	0	0	0	0	0	0		0	0	0	0		0	0	0	0
UK	UKM6	Highlands and Islands	0	0	0	0	0	0	0	0	0	0	0		0	0	0	0	0	0	0	0	0	0	0	0		0	0	0	0		0	0	0	0
UK	UKN0	Northern Ireland	0	0	0	0	0	0	0	0	0	0	0		0	0	0	0	0	0	0	0	0	0	0	0		0	0	0	0		0	0	0	0
