# Supplementary material
Source: MDPI journal article supplement (https://www.mdpi.com/1996-1073/12/8/1513)
Supplement: s1 [file s1 › Table(S1)_NUTs0_EU28Values.xlsx]

## Sheet: NUTs0 (mass)
FRUIT		CRT	CRE_WASTE	CRE_SELF	CRE_COM-S	CRE_COM-M	CRE_COM-L	CRI_WASTE	CRI_SELF	CRI_COM-S	CRI_COM-M	CRI_COM-L		FRUIT	BioTH	BioT	BioE_WASTE	BioE_SELF	BioE_COM-S	BioE_COM-M	BioE_COM-L	BioI_WASTE	BioI_SELF	BioI_COM-S	BioI_COM-M	BioI_COM-L												BioT	CRE_COM			Best economic case	CR BEST Economic	BioE_COM_BEST	GAP = BioT - BioE_COM_BEST
Country		(%)	(%)	(%)	(%)	(%)	(%)	(%)	(%)	(%)	(%)	(%)			t DM·yr-1	t DM·yr-1	t DM·yr-1	t DM·yr-1	t DM·yr-1	t DM·yr-1	t DM·yr-1	t DM·yr-1	t DM·yr-1	t DM·yr-1	t DM·yr-1	t DM·yr-1												(t DM)	S	M	L		(%)	(t DM)	(t DM)	(%)
AT	Austria	9.00346	0	4.42566	41.6299	92.7688	93.5705	14.8655	15.2956	15.7917	24.8535	25.3835		AT	27428.3	24958.8	24958.8	23854.2	14568.5	1804.81	1604.73	21248.6	20205.6	12267.9	1356.25	1197.39	20530.4	19531.1	11906.9	1317.54	1159.76	21248.6	20205.6	12267.9	1356.25	1197.39		24958.8	41.6299	92.7688	93.5705	BioE_COM-S	41.6299	14568.5	10390.3	41.6299
BE	Belgium	9	0	0.755203	22.4768	21.864	21.9795	2.54094	2.55266	2.37361	2.36959	2.33761		BE	34898.8	31757.9	31757.9	31518.1	24619.8	24814.4	24777.7	30951	30713.5	24035.4	24226.4	24198.5	30951	30713.5	24035.4	24226.4	24198.5	30951	30713.5	24035.4	24226.4	24198.5		31757.9	22.4768	21.864	21.9795	BioE_COM-M	21.864	24814.4	6943.55	21.864
BG	Bulgaria	9.10391	0	23.6326	86.9619	97.6899	99.9477	12.4658	13.9252	11.0965	10.6348	11.563		BG	81775.8	74331	74331	56764.7	9691.38	1717.09	38.8639	65065.1	48860.1	8615.97	1534.49	34.3701	17750	14328.3	2300.9	472.953	9.63662	26097.1	21023.1	3594.87	733.762	15.6352		74331	86.9619	97.6899	99.9477	BioE_COM-S	86.9619	9691.38	64639.7	86.9619
CY	Chyprus	9.75296	0	58.7393	73.3803	85.4706	82.3881	11.8052	13.125	13.125	13.125	13.125		CY	9628.61	8689.53	8689.53	3585.37	2313.13	1262.54	1530.39	7663.72	3114.79	2009.53	1096.83	1329.53	0.766372	0.311479	0.200953	0.109683	0.132953	0.766372	0.311479	0.200953	0.109683	0.132953		8689.53	73.3803	85.4706	82.3881	BioE_COM-S	73.3803	2313.13	6376.4	73.3803
CZ	Czechia	9	0	1.29427	80.8761	100	100	31.7438	31.9634	25.5473	0	0		CZ	36307.4	33039.7	33039.7	32612.1	6318.48	0	0	22551.6	22188.2	4704.28	0	0	22280	21931.1	4684.64	0	0	22316.5	21966.8	4704.28	0	0		33039.7	80.8761	100	100	BioE_COM-S	80.8761	6318.48	26721.2	80.8761
DE	Germany	9	0	3.73499	36.759	59.5082	69.1002	11.4578	18.4189	17.0766	16.2956	16.1947		DE	110917	100935	100935	97164.7	63832	40870.2	31188.6	89369.7	79268	52931.7	34210.1	26137.7	71196.9	63920.7	41552.5	28418.3	22079.1	86666	76237.9	51146.6	33605.5	26133.8		100935	36.759	59.5082	69.1002	BioE_COM-S	36.759	63832	37102.5	36.759
DK	Denmark	9	0	0.998221	79.1218	100	100	18.6203	18.798	19.9265	0	0		DK	3261.24	2967.73	2967.73	2938.11	619.609	0	0	2415.13	2385.8	496.143	0	0	205.227	202.735	42.1601	0	0	2145.68	2119.62	440.79	0	0		2967.73	79.1218	100	100	BioE_COM-S	79.1218	619.609	2348.12	79.1218
EE	Estonia	9	0	4.13223	100	100	100	99.2066	100	0	0	0		EE	1800	1638	1638	1570.31	0	0	0	12.9957	0	0	0	0	0.00129957	0	0	0	0	0.00129957	0	0	0	0		1638	100	100	100		100	0	1638	100
EL	Greece	9	0	17.6418	34.4504	34.4504	34.4504	11.4635	11.6849	11.8636	11.8636	11.8636		EL	177701	161708	161708	133179	105999	105999	105999	143170	117618	93423.4	93423.4	93423.4	80921.3	68407.6	64717.8	64717.8	64717.8	94678.6	80144.2	76454.3	76454.3	76454.3		161708	34.4504	34.4504	34.4504	BioI_COM-S & BioI_COM-M & BioI_COM-L	34.4504	105999	55709	34.4504
ES	Spain	10.145	0	7.40377	24.2741	38.9227	32.726	24.8092	26.5539	25.5558	24.3335	27.4434		ES	478130	429624	429624	397815	325336	262402	289025	323037	292180	242194	198551	209707	205212	183147	142541	108848	117344	266104	238011	192617	153350	164648		429624	24.2741	38.9227	32.726	BioE_COM-S	24.2741	325336	104287	24.2741
FI	Finland	25.1057	0	3.77252	42.0325	85.0223	92.4287	32.4949	32.5711	32.5711	32.5711	32.5711		FI	1110	831.326	831.326	799.964	481.899	124.513	62.9425	561.187	539.407	324.939	83.958	42.4415	241.321	232.119	139.829	36.129	18.2635	555.49	533.991	321.677	83.115	42.0153		831.326	42.0325	85.0223	92.4287	BioE_COM-S	42.0325	481.899	349.427	42.0325
FR	France	9.26063	0	2.01273	22.9051	41.9109	41.2942	8.77691	8.89609	9.1021	9.35822	9.52472		FR	346063	314016	314016	307695	242090	182409	184346	286455	280323	220055	165339	166787	266788	261177	204073	152196	154627	284233	278167	218666	164691	166787		314016	22.9051	41.9109	41.2942	BioE_COM-S	22.9051	242090	71925.7	22.9051
HR	Croatia	9.74304	0	22.3213	40.6551	86.0397	100	6.02099	7.22243	7.56123	7.72979	0		HR	54945.4	49592	49592	38522.4	29430.4	6923.18	0	46606.1	35740.2	27205.1	6388.03	0	0	0	0	0	0	0	0	0	0	0		49592	40.6551	86.0397	100	BioE_COM-S	40.6551	29430.4	20161.7	40.6551
HU	Hungary	9	0	15.588	49.4072	71.8549	64.3553	6.00839	7.11793	6.36799	5.98721	5.85551		HU	187547	170668	170668	144064	86345.6	48034.7	60834	160413	133810	80847.1	45158.7	57271.9	101812	84316.1	50205.5	27930.6	35269.1	139518	115869	69699.7	39223.2	49666.7		170668	49.4072	71.8549	64.3553	BioE_COM-S	49.4072	86345.6	84322.1	49.4072
IE	Ireland	9	0	0	32.1212	58.3377	43.8182	1	1	1	1	1		IE	945	859.95	859.95	859.95	583.724	358.275	483.136	851.351	851.351	577.886	354.693	478.304	0.0851351	0.0851351	0.0577886	0.0354693	0.0478304	0.0851351	0.0851351	0.0577886	0.0354693	0.0478304		859.95	32.1212	58.3377	43.8182	BioE_COM-S	32.1212	583.724	276.226	32.1212
IT	Italy	11.4975	0	8.06699	20.5701	29.8893	25.8661	18.178	19.4827	19.4223	19.1096	19.6011		IT	557845	493707	493707	453880	392151	346141	366004	403961	365452	315986	279995	294264	244423	229853	194990	170887	180906	319198	297953	255370	225226	237819		493707	20.5701	29.8893	25.8661	BioE_COM-S	20.5701	392151	101556	20.5701
LT	Lithuania	9	0	8.80121	47.1141	100	100	43.4052	47.0483	47.0483	0	0		LT	20621.5	18765.6	18765.6	17114	9924.34	0	0	10620.3	9062.14	5255.11	0	0	1.06203	0.906214	0.525511	0	0	3643.36	3108.82	1802.79	0	0		18765.6	47.1141	100	100	BioE_COM-S	47.1141	9924.34	8841.23	47.1141
LU	Luxembourg	9	0	0	100	100	100	23.8462	23.8462	0	0	0		LU	207.594	188.911	188.911	188.911	0	0	0	143.863	143.863	0	0	0	143.863	143.863	0	0	0	143.863	143.863	0	0	0		188.911	100	100	100		100	0	188.911	100
LV	Latvia	9	0	0.622084	72.5205	100	100	13.8538	13.9155	13.9155	0	0		LV	9679.42	8808.27	8808.27	8753.48	2420.47	0	0	7587.99	7535.39	2083.65	0	0	0.758799	0.753539	0.208365	0	0	3254.88	3232.31	893.783	0	0		8808.27	72.5205	100	100	BioE_COM-S	72.5205	2420.47	6387.81	72.5205
MT	Malta	9	0	43.2432	100	100	100	0	0	0	0	0		MT	950.521	864.974	864.974	490.931	0	0	0	864.974	490.931	0	0	0	657.491	373.171	0	0	0	864.974	490.931	0	0	0		864.974	100	100	100		100	0	864.974	100
NL	Netherlands	9.08829	0	1.36502	41.716	93.3505	100	2.49467	2.51536	2.19907	2.20978	0		NL	30808.3	28008.4	28008.4	27626	16324.4	1862.4	0	27309.6	26931.1	15965.4	1821.25	0	27309.6	26931.1	15965.4	1821.25	0	27309.6	26931.1	15965.4	1821.25	0		28008.4	41.716	93.3505	100	BioE_COM-S	41.716	16324.4	11684	41.716
PL	Poland	9.0282	0	5.88601	13.7559	30.6978	36.2283	21.5047	22.3269	21.2192	12.3295	11.3747		PL	556495	506253	506253	476455	436614	350845	322846	397385	370077	343968	307587	286123	381133	356782	333043	302194	286123	381133	356782	333043	302194	286123		506253	13.7559	30.6978	36.2283	BioE_COM-S	13.7559	436614	69639.5	13.7559
PT	Portugal	10.1533	0	11.8438	31.8213	48.8253	35.808	8.94607	10.0912	11.0269	12.3908	11.6081		PT	84852.6	76237.2	76237.2	67207.9	51977.6	39014.2	48938.2	69417	60425.8	46246.1	34180	43257.4	6.9417	6.04258	4.62461	3.418	4.32574	14844.3	13173	9527.62	6449.62	9006.87		76237.2	31.8213	48.8253	35.808	BioE_COM-S	31.8213	51977.6	24259.6	31.8213
RO	Romania	9.02848	0	25.7868	72.6596	85.9121	84.2123	5.28334	5.38179	5.07623	5	5		RO	336424	306050	306050	227129	83675.2	43116.1	48318.3	289880	214906	79427.7	40960.3	45902.4	161594	118969	45014.4	22878	26083.6	216681	157689	61499	32518.7	37117.8		306050	72.6596	85.9121	84.2123	BioE_COM-S	72.6596	83675.2	222375	72.6596
SE	Sweden	9.21835	0	0.539252	54.9595	100	100	8.89049	8.93327	5.44231	0	0		SE	2844.44	2582.23	2582.23	2568.31	1163.05	0	0	2352.66	2338.88	1099.75	0	0	2319.71	2305.92	1099.75	0	0	2352.66	2338.88	1099.75	0	0		2582.23	54.9595	100	100	BioE_COM-S	54.9595	1163.05	1419.18	54.9595
SI	Slovenia	9.60178	0	12.2314	57.3836	85.5213	90.887	9.81629	10.5789	10.5332	10.3505	10.0064		SI	19931	18017.3	18017.3	15813.5	7678.32	2608.67	1641.91	16248.7	14140.6	6869.54	2338.66	1477.61	1.62487	1.41406	0.686954	0.233866	0.147761	7048.17	6133.77	2979.79	1014.44	640.942		18017.3	57.3836	85.5213	90.887	BioE_COM-S	57.3836	7678.32	10339	57.3836
SK	Slovakia	9.01795	0	1.21375	93.9042	100	100	25.6628	25.7938	22.1083	0	0		SK	15275.2	13897.7	13897.7	13729	847.178	0	0	10331.1	10187.8	659.881	0	0	9197.8	9075.59	605.57	0	0	9769.05	9641.42	658.419	0	0		13897.7	93.9042	100	100	BioE_COM-S	93.9042	847.178	13050.5	93.9042
UK	United Kingdom	9.1729	0	0.306269	42.9588	54.0773	54.0773	6.24308	6.25918	6.29415	5.30412	5.30412		UK	34917.1	31714.2	31714.2	31617	18090.1	14564	14564	29734.2	29638.1	16951.5	13791.5	13791.5	25788.8	25727.2	13704	12702.3	12702.3	29166.8	29070.7	16951.3	13791.5	13791.5		31714.2	42.9588	54.0773	54.0773	BioE_COM-S	42.9588	18090.1	13624	42.9588
EU28	EU28	9.69811	0	10.1416	33.5868	49.3295	48.3905	15.2712	16.6847	17.0139	15.0843	15.7621		EU28	3.22331e+06	2.91071e+06	2.91071e+06	2.61552e+06	1.93309e+06	1.47487e+06	1.5022e+06	2.46621e+06	2.17913e+06	1.6042e+06	1.2524e+06	1.26542e+06	1.67047e+06	1.51808e+06	1.15063e+06	918650	925243	1.98992e+06	1.79168e+06	1.35374e+06	1.07674e+06	1.09364e+06		2.91071e+06	33.5868	49.3295	48.3905	BioE_COM-S	33.5868	1.93309e+06	977615	33.5868
DRY FRUITS		CRT	CRE_WASTE	CRE_SELF	CRE_COM-S	CRE_COM-M	CRE_COM-L	CRI_WASTE	CRI_SELF	CRI_COM-S	CRI_COM-M	CRI_COM-L		Dry Fruits	BioTH	BioT	BioE_WASTE	BioE_SELF	BioE_COM-S	BioE_COM-M	BioE_COM-L	BioI_WASTE	BioI_SELF	BioI_COM-S	BioI_COM-M	BioI_COM-L												BioT	CRE_COM			Best economic case	CR BEST Economic	BioE_COM_BEST	GAP = BioT - BioE_COM_BEST
Country		(%)	(%)	(%)	(%)	(%)	(%)	(%)	(%)	(%)	(%)	(%)			t DM·yr-1	t DM·yr-1	t DM·yr-1	t DM·yr-1	t DM·yr-1	t DM·yr-1	t DM·yr-1	t DM·yr-1	t DM·yr-1	t DM·yr-1	t DM·yr-1	t DM·yr-1												(t DM)	S	M	L		(%)	(t DM)	(t DM)	(%)
AT	Austria	0	0	0	0	0	0	0	0	0	0	0		AT	0	0	0	0	0	0	0	0	0	0	0	0	0	0	0	0	0	0	0	0	0	0		0	0	0	0		0	0	0	0
BE	Belgium	0	0	0	0	0	0	0	0	0	0	0		BE	0	0	0	0	0	0	0	0	0	0	0	0	0	0	0	0	0	0	0	0	0	0		0	0	0	0		0	0	0	0
BG	Bulgaria	10.0873	0	8.44117	86.3582	97.7406	99.9223	2.5	2.5	2.5	2.5	2.5		BG	7868.5	7074.78	7074.78	6477.59	965.131	159.851	5.4996	6897.91	6315.65	941.003	155.855	5.36211	0.633089	0.587442	0.0923763	0.0155855	0.000536211	0.633089	0.587442	0.0923763	0.0155855	0.000536211		7074.78	86.3582	97.7406	99.9223	BioE_COM-S	86.3582	965.131	6109.65	86.3582
CY	Chyprus	10.7447	0	46.9741	65.7899	81.3276	77.3662	20	20	20	20	20		CY	2978.18	2658.19	2658.19	1409.53	909.37	496.346	601.649	2126.55	1127.62	727.496	397.077	481.319	0.212655	0.112762	0.0727496	0.0397077	0.0481319	0.212655	0.112762	0.0727496	0.0397077	0.0481319		2658.19	65.7899	81.3276	77.3662	BioE_COM-S	65.7899	909.37	1748.82	65.7899
CZ	Czechia	0	0	0	0	0	0	0	0	0	0	0		CZ	0	0	0	0	0	0	0	0	0	0	0	0	0	0	0	0	0	0	0	0	0	0		0	0	0	0		0	0	0	0
DE	Germany	10	0	1.94637	63.9535	76.9543	83.9312	0.25	0.25	0.25	0.25	0.25		DE	354.408	318.967	318.967	312.759	114.977	73.5083	51.2542	318.17	311.977	114.689	73.3245	51.1261	101.533	100.186	45.0656	36.1954	32.2368	101.533	100.186	45.0656	36.1954	32.2368		318.967	63.9535	76.9543	83.9312	BioE_COM-S	63.9535	114.977	203.991	63.9535
DK	Denmark	10	0	0	100	100	100	0.25	0.25	0	0	0		DK	5.06876	4.56189	4.56189	4.56189	0	0	0	4.55048	4.55048	0	0	0	0.000455048	0.000455048	0	0	0	0.000455048	0.000455048	0	0	0		4.56189	100	100	100		100	0	4.56189	100
EE	Estonia	0	0	0	0	0	0	0	0	0	0	0		EE	0	0	0	0	0	0	0	0	0	0	0	0	0	0	0	0	0	0	0	0	0	0		0	0	0	0		0	0	0	0
EL	Greece	10	0	20.2396	32.2481	32.2481	32.2481	20	20	20	20	20		EL	22502.4	20252.2	20252.2	16153.2	13721.2	13721.2	13721.2	16201.7	12922.6	10977	10977	10977	1.62017	1.29226	1.0977	1.0977	1.0977	1682	1443.07	1214.12	1214.12	1214.12		20252.2	32.2481	32.2481	32.2481	BioI_COM-S & BioI_COM-M & BioI_COM-L	32.2481	13721.2	6530.94	32.2481
ES	Spain	10.2871	0	2.95357	23.2136	38.2389	28.6989	0	0	0	0	0		ES	329151	295291	295291	286570	226743	182375	210546	295291	286570	226743	182375	210546	29.5291	28.657	22.6743	18.2375	21.0546	45768.3	44397	38460.6	31502.5	31349.3		295291	23.2136	38.2389	28.6989	BioE_COM-S	23.2136	226743	68547.8	23.2136
FI	Finland	0	0	0	0	0	0	0	0	0	0	0		FI	0	0	0	0	0	0	0	0	0	0	0	0	0	0	0	0	0	0	0	0	0	0		0	0	0	0		0	0	0	0
FR	France	10.4082	0	1.98536	16.1037	30.5023	28.0587	0.5	0.5	0.5	0.5	0.5		FR	27966.2	25055.4	25055.4	24558	21020.6	17413	18025.2	24930.2	24435.2	20915.5	17325.9	17935.1	2.49302	2.44352	2.09155	1.73259	1.79351	194.49	194.441	111.921	47.2371	48.6143		25055.4	16.1037	30.5023	28.0587	BioE_COM-S	16.1037	21020.6	4034.84	16.1037
HR	Croatia	10.2271	0	25.5907	40.9245	85.8423	100	30	30	30	30	0		HR	6526.09	5858.66	5858.66	4359.39	3461.03	829.449	0	4101.06	3051.57	2422.72	580.615	0	0	0	0	0	0	0	0	0	0	0		5858.66	40.9245	85.8423	100	BioE_COM-S	40.9245	3461.03	2397.63	40.9245
HU	Hungary	10	0	16.0927	57.4062	78.5775	73.4551	0	0	0	0	0		HU	6294.85	5665.37	5665.37	4753.66	2413.09	1213.66	1503.87	5665.37	4753.66	2413.09	1213.66	1503.87	1229.22	967.476	278.64	75.7701	84.7277	5644.34	4735.59	2400.83	1206.13	1493.71		5665.37	57.4062	78.5775	73.4551	BioE_COM-S	57.4062	2413.09	3252.27	57.4062
IE	Ireland	0	0	0	0	0	0	0	0	0	0	0		IE	0	0	0	0	0	0	0	0	0	0	0	0	0	0	0	0	0	0	0	0	0	0		0	0	0	0		0	0	0	0
IT	Italy	11.4942	0	12.7641	24.6832	35.0198	29.5272	30	30	30	30	30		IT	128705	113912	113912	99371.9	85794.7	74020.1	80276.8	79738.2	69560.4	60056.3	51814.1	56193.8	50.93	45.7554	39.5894	33.8694	36.1292	8368.52	7585.93	6147.75	4902.62	5546.53		113912	24.6832	35.0198	29.5272	BioE_COM-S	24.6832	85794.7	28117.1	24.6832
LT	Lithuania	10	0	0	42.0103	100	100	5	5	5	0	0		LT	73.5878	66.229	66.229	66.229	38.406	0	0	62.9175	62.9175	36.4857	0	0	0.00629175	0.00629175	0.00364857	0	0	0.00629175	0.00629175	0.00364857	0	0		66.229	42.0103	100	100	BioE_COM-S	42.0103	38.406	27.823	42.0103
LU	Luxembourg	0	0	0	0	0	0	0	0	0	0	0		LU	0	0	0	0	0	0	0	0	0	0	0	0	0	0	0	0	0	0	0	0	0	0		0	0	0	0		0	0	0	0
LV	Latvia	0	0	0	0	0	0	0	0	0	0	0		LV	0	0	0	0	0	0	0	0	0	0	0	0	0	0	0	0	0	0	0	0	0	0		0	0	0	0		0	0	0	0
MT	Malta	0	0	0	0	0	0	0	0	0	0	0		MT	0	0	0	0	0	0	0	0	0	0	0	0	0	0	0	0	0	0	0	0	0	0		0	0	0	0		0	0	0	0
NL	Netherlands	10	0	0	100	100	100	0.5	0.5	0	0	0		NL	12.1051	10.8946	10.8946	10.8946	0	0	0	10.8402	10.8402	0	0	0	10.8402	10.8402	0	0	0	10.8402	10.8402	0	0	0		10.8946	100	100	100		100	0	10.8946	100
PL	Poland	10.2463	0	3.14295	15.8652	75.0213	80.4841	5	5	5	5	5		PL	25550.6	22932.6	22932.6	22211.8	19294.3	5728.27	4475.5	21786	21101.2	18329.6	5441.85	4251.73	11248.3	10642.3	9026.07	5299.36	4251.73	16486.4	15862.3	13676.1	5299.36	4251.73		22932.6	15.8652	75.0213	80.4841	BioE_COM-S	15.8652	19294.3	3638.3	15.8652
PT	Portugal	10.4033	0	3.84704	18.0962	30.877	19.6188	0	0	0	0	0		PT	76276.3	68341	68341	65711.9	55973.9	47239.4	54933.4	68341	65711.9	55973.9	47239.4	54933.4	6.8341	6.57119	5.59739	4.72394	5.49334	6.8341	6.57119	5.59739	4.72394	5.49334		68341	18.0962	30.877	19.6188	BioE_COM-S	18.0962	55973.9	12367.1	18.0962
RO	Romania	10.0559	0	8.91008	71.6196	89.7383	90.8094	5	5	5	5	5		RO	1627.69	1464.01	1464.01	1333.56	415.491	150.232	134.551	1390.81	1266.89	394.717	142.72	127.823	0.139081	0.126689	0.0394717	0.014272	0.0127823	807.385	712.473	205.745	71.1655	67.9892		1464.01	71.6196	89.7383	90.8094	BioE_COM-S	71.6196	415.491	1048.52	71.6196
SE	Sweden	0	0	0	0	0	0	0	0	0	0	0		SE	0	0	0	0	0	0	0	0	0	0	0	0	0	0	0	0	0	0	0	0	0	0		0	0	0	0		0	0	0	0
SI	Slovenia	10.5934	0	18.6505	60.9482	87.3413	92.7543	30	30	30	30	30		SI	567.207	507.121	507.121	412.54	198.04	64.1948	36.7444	354.985	288.778	138.628	44.9363	25.721	0.0354985	0.0288778	0.0138628	0.00449363	0.0025721	0.0354985	0.0288778	0.0138628	0.00449363	0.0025721		507.121	60.9482	87.3413	92.7543	BioE_COM-S	60.9482	198.04	309.081	60.9482
SK	Slovakia	10.006	0	0	98.9533	100	100	0	0	0	0	0		SK	176.559	158.893	158.893	158.893	1.66306	0	0	158.893	158.893	1.66306	0	0	36.9357	36.9357	1.66306	0	0	36.9357	36.9357	1.66306	0	0		158.893	98.9533	100	100	BioE_COM-S	98.9533	1.66306	157.23	98.9533
UK	United Kingdom	0	0	0	0	0	0	0	0	0	0	0		UK	0	0	0	0	0	0	0	0	0	0	0	0	0	0	0	0	0	0	0	0	0	0		0	0	0	0		0	0	0	0
EU28	EU28	10.5342	0	6.26713	24.3176	39.6943	32.5263	7.40758	6.78469	7.16345	7.48297	7.09829		EU28	636636	569572	569572	533876	431065	343484	384311	527380	497654	400186	317781	357032	12719.3	11843.4	9422.71	5471.06	4434.33	79108.5	75086	62269.5	44284.1	44009.8		569572	24.3176	39.6943	32.5263	BioE_COM-S	24.3176	431065	138506	24.3176
CITRUS		CRT	CRE_WASTE	CRE_SELF	CRE_COM-S	CRE_COM-M	CRE_COM-L	CRI_WASTE	CRI_SELF	CRI_COM-S	CRI_COM-M	CRI_COM-L		Citrus	BioTH	BioT	BioE_WASTE	BioE_SELF	BioE_COM-S	BioE_COM-M	BioE_COM-L	BioI_WASTE	BioI_SELF	BioI_COM-S	BioI_COM-M	BioI_COM-L												BioT	CRE_COM			Best economic case	CR BEST Economic	BioE_COM_BEST	GAP = BioT - BioE_COM_BEST
Country		(%)	(%)	(%)	(%)	(%)	(%)	(%)	(%)	(%)	(%)	(%)			t DM·yr-1	t DM·yr-1	t DM·yr-1	t DM·yr-1	t DM·yr-1	t DM·yr-1	t DM·yr-1	t DM·yr-1	t DM·yr-1	t DM·yr-1	t DM·yr-1	t DM·yr-1												(t DM)	S	M	L		(%)	(t DM)	(t DM)	(%)
AT	Austria	0	0	0	0	0	0	0	0	0	0	0		AT	0	0	0	0	0	0	0	0	0	0	0	0	0	0	0	0	0	0	0	0	0	0		0	0	0	0		0	0	0	0
BE	Belgium	0	0	0	0	0	0	0	0	0	0	0		BE	0	0	0	0	0	0	0	0	0	0	0	0	0	0	0	0	0	0	0	0	0	0		0	0	0	0		0	0	0	0
BG	Bulgaria	0	0	0	0	0	0	0	0	0	0	0		BG	0	0	0	0	0	0	0	0	0	0	0	0	0	0	0	0	0	0	0	0	0	0		0	0	0	0		0	0	0	0
CY	Chyprus	10.7447	0	35.6383	58.4765	77.3359	72.5276	1.06383	1.65289	1.65289	1.65289	1.65289		CY	11899.5	10621	10621	6835.84	4410.2	2407.15	2917.83	10508	6722.85	4337.3	2367.36	2869.61	243.826	155.996	100.642	54.9318	66.5859	2606.61	1667.67	1075.91	587.247	711.835		10621	58.4765	77.3359	72.5276	BioE_COM-S	58.4765	4410.2	6210.77	58.4765
CZ	Czechia	0	0	0	0	0	0	0	0	0	0	0		CZ	0	0	0	0	0	0	0	0	0	0	0	0	0	0	0	0	0	0	0	0	0	0		0	0	0	0		0	0	0	0
DE	Germany	0	0	0	0	0	0	0	0	0	0	0		DE	0	0	0	0	0	0	0	0	0	0	0	0	0	0	0	0	0	0	0	0	0	0		0	0	0	0		0	0	0	0
DK	Denmark	0	0	0	0	0	0	0	0	0	0	0		DK	0	0	0	0	0	0	0	0	0	0	0	0	0	0	0	0	0	0	0	0	0	0		0	0	0	0		0	0	0	0
EE	Estonia	0	0	0	0	0	0	0	0	0	0	0		EE	0	0	0	0	0	0	0	0	0	0	0	0	0	0	0	0	0	0	0	0	0	0		0	0	0	0		0	0	0	0
EL	Greece	10	0	31.0681	43.613	43.613	43.613	3.78945	5.02026	5.12792	5.12792	5.12792		EL	76227.3	68604.6	68604.6	47290.5	38684	38684	38684	66004.8	44916.4	36700.3	36700.3	36700.3	13.33	11.2212	10.3996	10.3996	10.3996	37.8275	33.9736	33.152	33.152	33.152		68604.6	43.613	43.613	43.613	BioI_COM-S & BioI_COM-M & BioI_COM-L	43.613	38684	29920.5	43.613
ES	Spain	10.3646	0	14.108	44.6145	58.1926	48.3057	6.48311	6.61587	6.95346	7.18536	7.01421		ES	545869	489292	489292	420263	270997	204561	252936	457571	392459	252153	189862	235195	94423.3	76499.1	38217.7	23312.8	33762.9	312111	263994	158795	111484	146343		489292	44.6145	58.1926	48.3057	BioE_COM-S	44.6145	270997	218296	44.6145
FI	Finland	0	0	0	0	0	0	0	0	0	0	0		FI	0	0	0	0	0	0	0	0	0	0	0	0	0	0	0	0	0	0	0	0	0	0		0	0	0	0		0	0	0	0
FR	France	10.5333	0	11.5709	43.0011	73.3855	99.8835	4.10874	4.31924	4.31821	4.31507	2.5		FR	13599.9	12167.4	12167.4	10759.5	6935.29	3238.3	14.1698	11667.5	10294.8	6635.81	3098.57	13.8155	1.16675	1.02948	0.663581	0.309857	0.00138155	1029.91	885.323	570.329	265.845	0.00138155		12167.4	43.0011	73.3855	99.8835	BioE_COM-S	43.0011	6935.29	5232.12	43.0011
HR	Croatia	14.5045	0	54.2105	78.0926	96.3767	100	54.2105	100	100	100	0		HR	2494.82	2132.96	2132.96	976.67	467.275	77.2835	0	976.67	0	0	0	0	0	0	0	0	0	0	0	0	0	0		2132.96	78.0926	96.3767	100	BioE_COM-S	78.0926	467.275	1665.68	78.0926
HU	Hungary	0	0	0	0	0	0	0	0	0	0	0		HU	0	0	0	0	0	0	0	0	0	0	0	0	0	0	0	0	0	0	0	0	0	0		0	0	0	0		0	0	0	0
IE	Ireland	0	0	0	0	0	0	0	0	0	0	0		IE	0	0	0	0	0	0	0	0	0	0	0	0	0	0	0	0	0	0	0	0	0	0		0	0	0	0		0	0	0	0
IT	Italy	11.3171	0	17.495	31.5024	40.2951	31.8621	18.0664	21.6428	22.0782	22.5003	22.3158		IT	223519	198223	198223	163544	135778	118349	135065	162411	128148	105801	91720	104924	2444.42	2170.88	1595.27	1246.29	1659.15	5814.13	5169.18	3783.3	2948.73	3918.93		198223	31.5024	40.2951	31.8621	BioE_COM-S	31.5024	135778	62445	31.5024
LT	Lithuania	0	0	0	0	0	0	0	0	0	0	0		LT	0	0	0	0	0	0	0	0	0	0	0	0	0	0	0	0	0	0	0	0	0	0		0	0	0	0		0	0	0	0
LU	Luxembourg	0	0	0	0	0	0	0	0	0	0	0		LU	0	0	0	0	0	0	0	0	0	0	0	0	0	0	0	0	0	0	0	0	0	0		0	0	0	0		0	0	0	0
LV	Latvia	0	0	0	0	0	0	0	0	0	0	0		LV	0	0	0	0	0	0	0	0	0	0	0	0	0	0	0	0	0	0	0	0	0	0		0	0	0	0		0	0	0	0
MT	Malta	10	0	54.5455	100	100	100	0	0	0	0	0		MT	415.15	373.635	373.635	169.834	0	0	0	373.635	169.834	0	0	0	102.339	46.5177	0	0	0	136.987	62.267	0	0	0		373.635	100	100	100		100	0	373.635	100
NL	Netherlands	0	0	0	0	0	0	0	0	0	0	0		NL	0	0	0	0	0	0	0	0	0	0	0	0	0	0	0	0	0	0	0	0	0	0		0	0	0	0		0	0	0	0
PL	Poland	0	0	0	0	0	0	0	0	0	0	0		PL	0	0	0	0	0	0	0	0	0	0	0	0	0	0	0	0	0	0	0	0	0	0		0	0	0	0		0	0	0	0
PT	Portugal	10.5129	0	12.3633	23.8417	36.8773	32.3537	5.46123	5.5263	5.51242	5.51061	5.55426		PT	27804.7	24881.7	24881.7	21805.5	18949.5	15706	16831.5	23522.8	20600.4	17904.9	14840.5	15896.7	2.35228	2.06004	1.79049	1.48405	1.58967	2.35228	2.06004	1.79049	1.48405	1.58967		24881.7	23.8417	36.8773	32.3537	BioE_COM-S	23.8417	18949.5	5932.21	23.8417
RO	Romania	0	0	0	0	0	0	0	0	0	0	0		RO	0	0	0	0	0	0	0	0	0	0	0	0	0	0	0	0	0	0	0	0	0	0		0	0	0	0		0	0	0	0
SE	Sweden	0	0	0	0	0	0	0	0	0	0	0		SE	0	0	0	0	0	0	0	0	0	0	0	0	0	0	0	0	0	0	0	0	0	0		0	0	0	0		0	0	0	0
SI	Slovenia	0	0	0	0	0	0	0	0	0	0	0		SI	0	0	0	0	0	0	0	0	0	0	0	0	0	0	0	0	0	0	0	0	0	0		0	0	0	0		0	0	0	0
SK	Slovakia	0	0	0	0	0	0	0	0	0	0	0		SK	0	0	0	0	0	0	0	0	0	0	0	0	0	0	0	0	0	0	0	0	0	0		0	0	0	0		0	0	0	0
UK	United Kingdom	0	0	0	0	0	0	0	0	0	0	0		UK	0	0	0	0	0	0	0	0	0	0	0	0	0	0	0	0	0	0	0	0	0	0		0	0	0	0		0	0	0	0
EU28	EU28	10.5933	0	16.7	40.9372	52.4961	44.6297	9.08609	10.174	11.064	11.6007	11.3898		EU28	901830	806297	806297	671645	476221	383022	446449	733036	603312	423532	338589	395599	97230.8	78886.8	39926.5	24626.3	35500.6	321738	271815	164259	115321	151008		806297	40.9372	52.4961	44.6297	BioE_COM-S	40.9372	476221	330076	40.9372
OLIVE		CRT	CRE_WASTE	CRE_SELF	CRE_COM-S	CRE_COM-M	CRE_COM-L	CRI_WASTE	CRI_SELF	CRI_COM-S	CRI_COM-M	CRI_COM-L		Olive	BioTH	BioT	BioE_WASTE	BioE_SELF	BioE_COM-S	BioE_COM-M	BioE_COM-L	BioI_WASTE	BioI_SELF	BioI_COM-S	BioI_COM-M	BioI_COM-L												BioT	CRE_COM			Best economic case	CR BEST Economic	BioE_COM_BEST	GAP = BioT - BioE_COM_BEST
Country		(%)	(%)	(%)	(%)	(%)	(%)	(%)	(%)	(%)	(%)	(%)			t DM·yr-1	t DM·yr-1	t DM·yr-1	t DM·yr-1	t DM·yr-1	t DM·yr-1	t DM·yr-1	t DM·yr-1	t DM·yr-1	t DM·yr-1	t DM·yr-1	t DM·yr-1												(t DM)	S	M	L		(%)	(t DM)	(t DM)	(%)
AT	Austria	0	0	0	0	0	0	0	0	0	0	0		AT	0	0	0	0	0	0	0	0	0	0	0	0	0	0	0	0	0	0	0	0	0	0		0	0	0	0		0	0	0	0
BE	Belgium	0	0	0	0	0	0	0	0	0	0	0		BE	0	0	0	0	0	0	0	0	0	0	0	0	0	0	0	0	0	0	0	0	0	0		0	0	0	0		0	0	0	0
BG	Bulgaria	0	0	0	0	0	0	0	0	0	0	0		BG	0	0	0	0	0	0	0	0	0	0	0	0	0	0	0	0	0	0	0	0	0	0		0	0	0	0		0	0	0	0
CY	Chyprus	4.79434	0	55.4983	71.2893	84.3293	81.0047	33.2474	36.0811	36.0811	36.0811	36.0811		CY	16373.3	15588.3	15588.3	6937.08	4475.51	2442.8	2961.05	10405.6	4434.1	2860.7	1561.41	1892.67	1.04056	0.44341	0.28607	0.156141	0.189267	1.04056	0.44341	0.28607	0.156141	0.189267		15588.3	71.2893	84.3293	81.0047	BioE_COM-S	71.2893	4475.51	11112.8	71.2893
CZ	Czechia	0	0	0	0	0	0	0	0	0	0	0		CZ	0	0	0	0	0	0	0	0	0	0	0	0	0	0	0	0	0	0	0	0	0	0		0	0	0	0		0	0	0	0
DE	Germany	0	0	0	0	0	0	0	0	0	0	0		DE	0	0	0	0	0	0	0	0	0	0	0	0	0	0	0	0	0	0	0	0	0	0		0	0	0	0		0	0	0	0
DK	Denmark	0	0	0	0	0	0	0	0	0	0	0		DK	0	0	0	0	0	0	0	0	0	0	0	0	0	0	0	0	0	0	0	0	0	0		0	0	0	0		0	0	0	0
EE	Estonia	0	0	0	0	0	0	0	0	0	0	0		EE	0	0	0	0	0	0	0	0	0	0	0	0	0	0	0	0	0	0	0	0	0	0		0	0	0	0		0	0	0	0
EL	Greece	4	0	26.1984	52.5625	52.5625	52.5625	34.6695	36.0682	35.94	35.94	35.94		EL	932835	895521	895521	660909	424813	424813	424813	585049	422531	272135	272135	272135	10253.4	7548.08	4312.63	4312.63	4312.63	63002.8	44833.1	38031.4	38031.4	38031.4		895521	52.5625	52.5625	52.5625	BioI_COM-S & BioI_COM-M & BioI_COM-L	52.5625	424813	470709	52.5625
ES	Spain	4.52091	0	4.65319	16.9054	25.4472	19.3094	9.7569	9.95188	9.87076	9.65736	9.80583		ES	2.7496e+06	2.62529e+06	2.62529e+06	2.50313e+06	2.18147e+06	1.95723e+06	2.11836e+06	2.36914e+06	2.25402e+06	1.96615e+06	1.76821e+06	1.91064e+06	843768	808176	730941	682618	715982	2.16198e+06	2.06022e+06	1.80175e+06	1.62185e+06	1.75148e+06		2.62529e+06	16.9054	25.4472	19.3094	BioE_COM-S	16.9054	2.18147e+06	443816	16.9054
FI	Finland	0	0	0	0	0	0	0	0	0	0	0		FI	0	0	0	0	0	0	0	0	0	0	0	0	0	0	0	0	0	0	0	0	0	0		0	0	0	0		0	0	0	0
FR	France	4.30828	0	14.8076	27.2301	40.2251	38.5652	16.7227	18.6339	19.064	19.6437	20.3386		FR	20932.8	20030.9	20030.9	17064.8	14576.5	11973.5	12306	16681.2	13885	11797.6	9621.44	9803.1	1.44103	1.17148	1.03996	0.896977	0.98031	1.44103	1.17148	1.03996	0.896977	0.98031		20030.9	27.2301	40.2251	38.5652	BioE_COM-S	27.2301	14576.5	5454.45	27.2301
HR	Croatia	8.80475	0	54.269	78.1206	96.3813	100	7.77778	10.9527	10.9527	10.9527	0		HR	20350.9	18559	18559	8487.22	4060.6	671.59	0	17115.5	7557.64	3615.86	598.033	0	0	0	0	0	0	0	0	0	0	0		18559	78.1206	96.3813	100	BioE_COM-S	78.1206	4060.6	14498.4	78.1206
HU	Hungary	0	0	0	0	0	0	0	0	0	0	0		HU	0	0	0	0	0	0	0	0	0	0	0	0	0	0	0	0	0	0	0	0	0	0		0	0	0	0		0	0	0	0
IE	Ireland	0	0	0	0	0	0	0	0	0	0	0		IE	0	0	0	0	0	0	0	0	0	0	0	0	0	0	0	0	0	0	0	0	0	0		0	0	0	0		0	0	0	0
IT	Italy	5.12921	0	29.4985	37.1661	43.9923	40.439	16.4564	21.057	21.3165	21.6593	21.6267		IT	1.43404e+06	1.36048e+06	1.36048e+06	959160	854844	761975	810318	1.1366e+06	757190	672621	596937	635073	5556.15	4294.35	2145.29	1272.08	1168.71	256696	163890	146218	131936	139367		1.36048e+06	37.1661	43.9923	40.439	BioE_COM-S	37.1661	854844	505639	37.1661
LT	Lithuania	0	0	0	0	0	0	0	0	0	0	0		LT	0	0	0	0	0	0	0	0	0	0	0	0	0	0	0	0	0	0	0	0	0	0		0	0	0	0		0	0	0	0
LU	Luxembourg	0	0	0	0	0	0	0	0	0	0	0		LU	0	0	0	0	0	0	0	0	0	0	0	0	0	0	0	0	0	0	0	0	0	0		0	0	0	0		0	0	0	0
LV	Latvia	0	0	0	0	0	0	0	0	0	0	0		LV	0	0	0	0	0	0	0	0	0	0	0	0	0	0	0	0	0	0	0	0	0	0		0	0	0	0		0	0	0	0
MT	Malta	4	0	50	100	100	100	11.7857	18.5714	0	0	0		MT	201.016	192.976	192.976	96.4878	0	0	0	170.232	78.5686	0	0	0	0.0170232	0.00785686	0	0	0	0.0170232	0.00785686	0	0	0		192.976	100	100	100		100	0	192.976	100
NL	Netherlands	0	0	0	0	0	0	0	0	0	0	0		NL	0	0	0	0	0	0	0	0	0	0	0	0	0	0	0	0	0	0	0	0	0	0		0	0	0	0		0	0	0	0
PL	Poland	0	0	0	0	0	0	0	0	0	0	0		PL	0	0	0	0	0	0	0	0	0	0	0	0	0	0	0	0	0	0	0	0	0	0		0	0	0	0		0	0	0	0
PT	Portugal	4.28654	0	10.3786	27.0033	41.2705	28.7359	8.00436	8.35228	8.38452	8.43831	8.44679		PT	294292	281677	281677	252443	205615	165427	200734	259130	231358	188375	151468	183779	25.913	23.1358	18.8375	15.1468	18.3779	20775.5	18504	16941.1	15642.4	17148.4		281677	27.0033	41.2705	28.7359	BioE_COM-S	27.0033	205615	76062	27.0033
RO	Romania	0	0	0	0	0	0	0	0	0	0	0		RO	0	0	0	0	0	0	0	0	0	0	0	0	0	0	0	0	0	0	0	0	0	0		0	0	0	0		0	0	0	0
SE	Sweden	0	0	0	0	0	0	0	0	0	0	0		SE	0	0	0	0	0	0	0	0	0	0	0	0	0	0	0	0	0	0	0	0	0	0		0	0	0	0		0	0	0	0
SI	Slovenia	4.66667	0	57.3034	72.6845	81.765	77.9104	13.5393	20	20	20	20		SI	994.32	947.918	947.918	404.729	258.928	172.853	209.391	819.576	323.783	207.143	138.282	167.513	0.0819576	0.0323783	0.0207143	0.0138282	0.0167513	0.0819576	0.0323783	0.0207143	0.0138282	0.0167513		947.918	72.6845	81.765	77.9104	BioE_COM-S	72.6845	258.928	688.99	72.6845
SK	Slovakia	0	0	0	0	0	0	0	0	0	0	0		SK	0	0	0	0	0	0	0	0	0	0	0	0	0	0	0	0	0	0	0	0	0	0		0	0	0	0		0	0	0	0
UK	United Kingdom	0	0	0	0	0	0	0	0	0	0	0		UK	0	0	0	0	0	0	0	0	0	0	0	0	0	0	0	0	0	0	0	0	0	0		0	0	0	0		0	0	0	0
EU28	EU28	4.59489	0	15.5158	29.2849	36.2875	31.5924	15.7749	16.2693	15.5106	15.7618	15.5815		EU28	5.46961e+06	5.21829e+06	5.21829e+06	4.40863e+06	3.69012e+06	3.3247e+06	3.5697e+06	4.39511e+06	3.69138e+06	3.11776e+06	2.80067e+06	3.01349e+06	859606	820044	737419	688218	721483	2.50245e+06	2.28745e+06	2.00295e+06	1.80746e+06	1.94603e+06		5.21829e+06	29.2849	36.2875	31.5924	BioE_COM-S	29.2849	3.69012e+06	1.52817e+06	29.2849
VINEYARD		CRT	CRE_WASTE	CRE_SELF	CRE_COM-S	CRE_COM-M	CRE_COM-L	CRI_WASTE	CRI_SELF	CRI_COM-S	CRI_COM-M	CRI_COM-L		Vineyard	BioTH	BioT	BioE_WASTE	BioE_SELF	BioE_COM-S	BioE_COM-M	BioE_COM-L	BioI_WASTE	BioI_SELF	BioI_COM-S	BioI_COM-M	BioI_COM-L												BioT	CRE_COM			Best economic case	CR BEST Economic	BioE_COM_BEST	GAP = BioT - BioE_COM_BEST
Country		(%)	(%)	(%)	(%)	(%)	(%)	(%)	(%)	(%)	(%)	(%)			t DM·yr-1	t DM·yr-1	t DM·yr-1	t DM·yr-1	t DM·yr-1	t DM·yr-1	t DM·yr-1	t DM·yr-1	t DM·yr-1	t DM·yr-1	t DM·yr-1	t DM·yr-1												(t DM)	S	M	L		(%)	(t DM)	(t DM)	(%)
AT	Austria	12.0116	0	6.86547	38.0658	77.9335	79.9201	10.6665	11.0473	11.1684	11.4692	11.2705		AT	49080.3	43185	43185	40220.1	26746.3	9529.4	8671.49	38578.7	35776.9	23759.1	8436.45	7694.17	34450.2	31930.4	21575.6	8429.15	7694.17	34450.2	31930.4	21575.6	8429.15	7694.17		43185	38.0658	77.9335	79.9201	BioE_COM-S	38.0658	26746.3	16438.7	38.0658
BE	Belgium	0	0	0	0	0	0	0	0	0	0	0		BE	0	0	0	0	0	0	0	0	0	0	0	0	0	0	0	0	0	0	0	0	0	0		0	0	0	0		0	0	0	0
BG	Bulgaria	12.1134	0	26.1994	84.5664	96.8274	99.9355	3.07807	3.28328	3.68548	4.39531	2.5		BG	55180.7	48496.4	48496.4	35790.6	7484.74	1538.6	31.2831	47003.7	34615.5	7208.89	1470.98	30.501	4.70037	3.46155	0.720889	0.147098	0.0030501	1238.05	512.302	114.879	0.147098	0.0030501		48496.4	84.5664	96.8274	99.9355	BioE_COM-S	84.5664	7484.74	41011.7	84.5664
CY	Chyprus	12.7281	0	39.6325	61.0534	78.7424	74.2325	11.5354	12.1522	12.1522	12.1522	12.1522		CY	9061.72	7908.33	7908.33	4774.06	3080.02	1681.12	2037.78	6996.07	4193.9	2705.73	1476.83	1790.14	0.699607	0.41939	0.270573	0.147683	0.179014	0.699607	0.41939	0.270573	0.147683	0.179014		7908.33	61.0534	78.7424	74.2325	BioE_COM-S	61.0534	3080.02	4828.3	61.0534
CZ	Czechia	12	0	6.55282	92.7354	100	100	4.67849	5.00656	5.17807	0	0		CZ	15057.9	13251	13251	12382.6	962.623	0	0	12631	11762.7	912.778	0	0	0	0	0	0	0	0	0	0	0	0		13251	92.7354	100	100	BioE_COM-S	92.7354	962.623	12288.3	92.7354
DE	Germany	12	0	6.52496	37.1881	46.1655	45.3877	7.0185	8.63643	8.77169	8.93362	8.97109		DE	102120	89865.5	89865.5	84001.9	56446.3	48378.6	49077.6	83558.3	76747.1	51495	44056.7	44674.8	60521.3	56462.3	43599.2	38949.4	40221.4	60521.3	56462.3	43599.2	38949.4	40221.4		89865.5	37.1881	46.1655	45.3877	BioE_COM-S	37.1881	56446.3	33419.3	37.1881
DK	Denmark	0	0	0	0	0	0	0	0	0	0	0		DK	0	0	0	0	0	0	0	0	0	0	0	0	0	0	0	0	0	0	0	0	0	0		0	0	0	0		0	0	0	0
EE	Estonia	0	0	0	0	0	0	0	0	0	0	0		EE	0	0	0	0	0	0	0	0	0	0	0	0	0	0	0	0	0	0	0	0	0	0		0	0	0	0		0	0	0	0
EL	Greece	12	0	17.0151	44.4664	44.4664	44.4664	13.8095	14.4231	14.9194	14.9194	14.9194		EL	106975	94137.8	94137.8	78120.2	52278.2	52278.2	52278.2	81137.8	66852.8	44478.6	44478.6	44478.6	8.11378	6.68528	4.44786	4.44786	4.44786	6307.45	5032.79	5030.56	5030.56	5030.56		94137.8	44.4664	44.4664	44.4664	BioI_COM-S & BioI_COM-M & BioI_COM-L	44.4664	52278.2	41859.7	44.4664
ES	Spain	12.2348	0	2.21957	23.3494	39.8407	30.3653	7.47877	7.58923	7.31719	6.85699	7.44009		ES	940455	825392	825392	807072	632668	496550	574760	763663	745822	586375	462502	531997	76.3663	74.5822	58.6375	46.2502	53.1997	158398	154087	118811	90490.7	92517.7		825392	23.3494	39.8407	30.3653	BioE_COM-S	23.3494	632668	192724	23.3494
FI	Finland	0	0	0	0	0	0	0	0	0	0	0		FI	0	0	0	0	0	0	0	0	0	0	0	0	0	0	0	0	0	0	0	0	0	0		0	0	0	0		0	0	0	0
FR	France	12.1395	0	2.0244	13.8652	25.1234	20.7322	15.7696	15.8627	15.8659	15.8254	15.7916		FR	879061	772348	772348	756712	665260	578308	612223	650551	636677	559710	486788	515543	332.832	306.353	131.292	48.7207	51.5543	169920	163690	129747	95239.5	95237.5		772348	13.8652	25.1234	20.7322	BioE_COM-S	13.8652	665260	107088	13.8652
HR	Croatia	14.2267	0	32.7748	55.518	90.3409	100	30.5564	30.8277	30.7636	30.7237	0		HR	33484.4	28720.7	28720.7	19307.5	12775.5	2774.17	0	19944.7	13355.5	8845.33	1921.84	0	0	0	0	0	0	0	0	0	0	0		28720.7	55.518	90.3409	100	BioE_COM-S	55.518	12775.5	15945.2	55.518
HU	Hungary	12	0	25.2707	63.0126	86.425	83.8453	5.96653	6.63153	6.10096	5.09411	4.95855		HU	63177	55595.7	55595.7	41546.3	20563.4	7547.14	8981.34	52278.6	38791.2	19308.9	7162.68	8535.99	5.22786	3.87912	1.93089	0.716268	0.853599	2945.15	1621.16	240.266	1.03747	0.853599		55595.7	63.0126	86.425	83.8453	BioE_COM-S	63.0126	20563.4	35032.3	63.0126
IE	Ireland	0	0	0	0	0	0	0	0	0	0	0		IE	0	0	0	0	0	0	0	0	0	0	0	0	0	0	0	0	0	0	0	0	0	0		0	0	0	0		0	0	0	0
IT	Italy	13.4968	0	10.5252	23.1847	32.9263	28.7946	34.5903	35.0844	34.8747	34.7679	34.8992		IT	789241	682719	682719	610861	524433	457925	486132	446564	396545	341538	298714	316476	12379.7	11392.3	9869.22	8440.29	8967.82	26859.8	24793.6	19144.1	15403.5	16419.2		682719	23.1847	32.9263	28.7946	BioE_COM-S	23.1847	524433	158286	23.1847
LT	Lithuania	0	0	0	0	0	0	0	0	0	0	0		LT	0	0	0	0	0	0	0	0	0	0	0	0	0	0	0	0	0	0	0	0	0	0		0	0	0	0		0	0	0	0
LU	Luxembourg	12	0	7.87402	100	100	100	10.5	10.5	0	0	0		LU	1337.31	1176.83	1176.83	1084.17	0	0	0	1053.27	970.331	0	0	0	0	0	0	0	0	0	0	0	0	0		1176.83	100	100	100		100	0	1176.83	100
LV	Latvia	0	0	0	0	0	0	0	0	0	0	0		LV	0	0	0	0	0	0	0	0	0	0	0	0	0	0	0	0	0	0	0	0	0	0		0	0	0	0		0	0	0	0
MT	Malta	12	0	39.3443	100	100	100	30	30	0	0	0		MT	932.38	820.494	820.494	497.677	0	0	0	574.346	348.374	0	0	0	0.0574346	0.0348374	0	0	0	0.0574346	0.0348374	0	0	0		820.494	100	100	100		100	0	820.494	100
NL	Netherlands	12	0	0	20.1575	91.2634	100	7.25	7.25	7.25	7.25	0		NL	63.18	55.5984	55.5984	55.5984	44.3912	4.85739	0	51.5675	51.5675	41.1728	4.50523	0	0	0	0	0	0	0	0	0	0	0		55.5984	20.1575	91.2634	100	BioE_COM-S	20.1575	44.3912	11.2072	20.1575
PL	Poland	12	0	8.02469	17.2057	65.6891	73.02	4	4	4	4	4		PL	284.31	250.193	250.193	230.116	207.145	85.8434	67.5021	240.185	220.911	198.859	82.4097	64.802	0	0	0	0	0	0	0	0	0	0		250.193	17.2057	65.6891	73.02	BioE_COM-S	17.2057	207.145	43.0475	17.2057
PT	Portugal	12.6135	0	14.4301	28.9701	40.9585	30.3991	2.98708	3.14645	3.16277	3.17275	3.16813		PT	199513	174348	174348	149189	123839	102937	121348	169140	144495	119922	99671.5	117503	16.914	14.4495	11.9922	9.96715	11.7503	16.914	14.4495	11.9922	9.96715	11.7503		174348	28.9701	40.9585	30.3991	BioE_COM-S	28.9701	123839	50508.6	28.9701
RO	Romania	12.0132	0	41.9458	77.0472	89.2926	84.9842	5	5	5	5	5		RO	169933	149519	149519	86802	34318.7	16009.6	22451.4	142043	82461.9	32602.7	15209.1	21328.8	14.2043	8.24619	3.26027	1.52091	2.13288	61915.4	37172.7	14522.9	5815.1	8822.91		149519	77.0472	89.2926	84.9842	BioE_COM-S	77.0472	34318.7	115200	77.0472
SE	Sweden	0	0	0	0	0	0	0	0	0	0	0		SE	0	0	0	0	0	0	0	0	0	0	0	0	0	0	0	0	0	0	0	0	0	0		0	0	0	0		0	0	0	0
SI	Slovenia	12.5897	0	17.7474	56.6173	80.5758	82.222	18.4856	18.745	19.0049	19.7317	20.4458		SI	17395.7	15205.6	15205.6	12507	6596.6	2953.56	2703.25	12394.7	10162.5	5342.92	2370.77	2150.55	1.23947	1.01625	0.534292	0.237077	0.215055	1.23947	1.01625	0.534292	0.237077	0.215055		15205.6	56.6173	80.5758	82.222	BioE_COM-S	56.6173	6596.6	8608.99	56.6173
SK	Slovakia	12.0148	0	1.53917	87.6415	100	100	0	0	0	0	0		SK	11583	10191.3	10191.3	10034.5	1259.5	0	0	10191.3	10034.5	1259.5	0	0	1.01913	1.00345	0.12595	0	0	2905.51	2864.97	260.872	0	0		10191.3	87.6415	100	100	BioE_COM-S	87.6415	1259.5	8931.83	87.6415
UK	United Kingdom	12.0959	0	0	60.9321	94.8022	94.8022	10.5	10.5	10.5	10.5	10.5		UK	1014.04	891.382	891.382	891.382	348.244	46.332	46.332	797.787	797.787	311.679	41.4671	41.4671	0	0	0	0	0	0	0	0	0	0		891.382	60.9321	94.8022	94.8022	BioE_COM-S	60.9321	348.244	543.138	60.9321
EU28	EU28	12.5074	0	8.69243	28.0273	40.992	35.6085	15.7489	16.0387	16.747	17.1016	16.9259		EU28	3.44495e+06	3.01408e+06	3.01408e+06	2.75208e+06	2.16931e+06	1.77855e+06	1.94081e+06	2.53939e+06	2.31068e+06	1.80602e+06	1.47439e+06	1.61231e+06	107813	100205	75257.2	55931	57007.8	525479	478183	353059	259369	265957		3.01408e+06	28.0273	40.992	35.6085	BioE_COM-S	28.0273	2.16931e+06	844766	28.0273
TOTAL		CRT	CRE_WASTE	CRE_SELF	CRE_COM-S	CRE_COM-M	CRE_COM-L	CRI_WASTE	CRI_SELF	CRI_COM-S	CRI_COM-M	CRI_COM-L		All Crops	BioTH	BioT	BioE_WASTE	BioE_SELF	BioE_COM-S	BioE_COM-M	BioE_COM-L	BioI_WASTE	BioI_SELF	BioI_COM-S	BioI_COM-M	BioI_COM-L												BioT	CRE_COM			Best economic case	CR BEST Economic	BioE_COM_BEST	GAP = BioT - BioE_COM_BEST
Country	Name	(%)	(%)	(%)	(%)	(%)	(%)	(%)	(%)	(%)	(%)	(%)			t DM·yr-1	t DM·yr-1	t DM·yr-1	t DM·yr-1	t DM·yr-1	t DM·yr-1	t DM·yr-1	t DM·yr-1	t DM·yr-1	t DM·yr-1	t DM·yr-1	t DM·yr-1												(t DM)	S	M	L		(%)	(t DM)	(t DM)	(%)
AT	Austria	10.9332	0	5.97185	39.3712	83.3672	84.9198	12.2044	12.6289	12.7987	13.6005	13.4744		AT	76508.6	68143.8	68143.8	64074.4	41314.8	11334.2	10276.2	59827.2	55982.5	36027	9792.7	8891.56	54980.6	51461.5	33482.5	9746.69	8853.93	55698.8	52136	33843.5	9785.4	8891.56		68143.8	39.3712	83.3672	84.9198	BioE_COM-S	39.3712	41314.8	26829	39.3712
BE	Belgium	9	0	0.755203	22.4768	21.864	21.9795	2.54094	2.55266	2.37361	2.36959	2.33761		BE	34898.8	31757.9	31757.9	31518.1	24619.8	24814.4	24777.7	30951	30713.5	24035.4	24226.4	24198.5	30951	30713.5	24035.4	24226.4	24198.5	30951	30713.5	24035.4	24226.4	24198.5		31757.9	22.4768	21.864	21.9795	BioE_COM-M	21.864	24814.4	6943.55	21.864
BG	Bulgaria	10.304	0	23.7635	86.0347	97.3707	99.9418	8.41832	9.33186	7.58153	7.44337	7.15617		BG	144825	129902	129902	99032.9	18141.2	3415.55	75.6467	118967	89791.3	16765.9	3161.32	70.2332	17755.4	14332.3	2301.72	473.115	9.6402	27335.8	21536	3709.84	733.924	15.6388		129902	86.0347	97.3707	99.9418	BioE_COM-S	86.0347	18141.2	111761	86.0347
CY	Chyprus	8.96255	0	48.2202	66.5938	81.7665	77.8981	17.0799	16.7727	16.7727	16.7727	16.7727		CY	49941.4	45465.4	45465.4	23541.9	15188.2	8289.94	10048.7	37699.9	19593.3	12640.8	6899.5	8363.26	246.545	157.283	101.473	55.385	67.1353	2609.33	1668.96	1076.74	587.7	712.384		45465.4	66.5938	81.7665	77.8981	BioE_COM-S	66.5938	15188.2	30277.1	66.5938
CZ	Czechia	9.87946	0	2.79956	84.2709	100	100	23.9962	24.5448	22.8543	0	0		CZ	51365.3	46290.7	46290.7	44994.7	7281.11	0	0	35182.7	33950.9	5617.06	0	0	22280	21931.1	4684.64	0	0	22316.5	21966.8	4704.28	0	0		46290.7	84.2709	100	100	BioE_COM-S	84.2709	7281.11	39009.6	84.2709
DE	Germany	10.4373	0	5.04387	37.0062	53.2635	57.9752	9.35172	13.8596	13.1668	12.295	11.7706		DE	213391	191119	191119	181479	120393	89322.3	80317.4	173246	156327	104541	78340.1	70863.6	131820	120483	85196.8	67403.9	62332.8	147289	132800	94790.9	72591.1	66387.5		191119	37.0062	53.2635	57.9752	BioE_COM-S	37.0062	120393	70725.8	37.0062
DK	Denmark	9.00155	0	0.996689	79.1538	100	100	18.5921	18.7692	19.9265	0	0		DK	3266.31	2972.29	2972.29	2942.67	619.609	0	0	2419.68	2390.35	496.143	0	0	205.228	202.735	42.1601	0	0	2145.68	2119.62	440.79	0	0		2972.29	79.1538	100	100	BioE_COM-S	79.1538	619.609	2352.68	79.1538
EE	Estonia	9	0	4.13223	100	100	100	99.2066	100	0	0	0		EE	1800	1638	1638	1570.31	0	0	0	12.9957	0	0	0	0	0.00129957	0	0	0	0	0.00129957	0	0	0	0		1638	100	100	100		100	0	1638	100
EL	Greece	5.77527	0	24.5578	48.7597	48.7597	48.7597	28.1127	28.9436	27.9751	27.9751	27.9751		EL	1.31624e+06	1.24022e+06	1.24022e+06	935652	635495	635495	635495	891564	664841	457714	457714	457714	91197.7	75974.9	69046.4	69046.4	69046.4	165709	131487	120764	120764	120764		1.24022e+06	48.7597	48.7597	48.7597	BioI_COM-S & BioI_COM-M & BioI_COM-L	48.7597	635495	604729	48.7597
ES	Spain	7.50144	0	5.36002	22.0299	33.4793	26.1369	9.77909	10.0524	9.99686	9.71975	10.0866		ES	5.0432e+06	4.66489e+06	4.66489e+06	4.41485e+06	3.63722e+06	3.10312e+06	3.44563e+06	4.20871e+06	3.97105e+06	3.27361e+06	2.8015e+06	3.09808e+06	1.14351e+06	1.06793e+06	911781	814843	867163	2.94436e+06	2.76071e+06	2.31044e+06	2.00868e+06	2.18634e+06		4.66489e+06	22.0299	33.4793	26.1369	BioE_COM-S	22.0299	3.63722e+06	1.02767e+06	22.0299
FI	Finland	25.1057	0	3.77252	42.0325	85.0223	92.4287	32.4949	32.5711	32.5711	32.5711	32.5711		FI	1110	831.326	831.326	799.964	481.899	124.513	62.9425	561.187	539.407	324.939	83.958	42.4415	241.321	232.119	139.829	36.129	18.2635	555.49	533.991	321.677	83.115	42.0153		831.326	42.0325	85.0223	92.4287	BioE_COM-S	42.0325	481.899	349.427	42.0325
FR	France	11.1839	0	2.34581	16.9405	30.6287	27.6931	13.4076	13.5366	13.7668	14.0127	14.1286		FR	1.28762e+06	1.14362e+06	1.14362e+06	1.11679e+06	949882	793342	826914	990285	965615	819114	682173	710082	267126	261488	204208	152247	154681	455379	442938	349096	260245	262074		1.14362e+06	16.9405	30.6287	27.6931	BioE_COM-S	16.9405	949882	193735	16.9405
HR	Croatia	10.983	0	31.6699	52.1331	89.2473	100	15.3717	16.6753	16.1488	15.8496	0		HR	117802	104863	104863	71653.3	50194.8	11275.7	0	88744.1	59704.9	42089	9488.52	0	0	0	0	0	0	0	0	0	0	0		104863	52.1331	89.2473	100	BioE_COM-S	52.1331	50194.8	54668.6	52.1331
HU	Hungary	9.76191	0	17.9214	52.8639	75.5117	69.2495	5.85158	6.83403	6.1772	5.74059	5.61908		HU	257019	231929	231929	190364	109322	56795.5	71319.2	218357	177354	102569	53535.1	67311.8	103047	85287.5	50486.1	28007	35354.7	148107	122226	72340.8	40430.4	51161.3		231929	52.8639	75.5117	69.2495	BioE_COM-S	52.8639	109322	122607	52.8639
IE	Ireland	9	0	0	32.1212	58.3377	43.8182	1	1	1	1	1		IE	945	859.95	859.95	859.95	583.724	358.275	483.136	851.351	851.351	577.886	354.693	478.304	0.0851351	0.0851351	0.0577886	0.0354693	0.0478304	0.0851351	0.0851351	0.0577886	0.0354693	0.0478304		859.95	32.1212	58.3377	43.8182	BioE_COM-S	32.1212	583.724	276.226	32.1212
IT	Italy	9.07352	0	19.7339	30.0467	38.2807	34.0903	21.7537	24.9221	24.9372	24.9788	25.0755		IT	3.13335e+06	2.84904e+06	2.84904e+06	2.28682e+06	1.993e+06	1.75841e+06	1.8778e+06	2.22927e+06	1.7169e+06	1.496e+06	1.31918e+06	1.40693e+06	264854	247756	208639	181880	192738	616937	499391	430664	380417	403071		2.84904e+06	30.0467	38.2807	34.0903	BioE_COM-S	30.0467	1.993e+06	856043	30.0467
LT	Lithuania	9.00356	0	8.77026	47.0962	100	100	43.2701	46.8862	46.8862	0	0		LT	20695.1	18831.8	18831.8	17180.2	9962.74	0	0	10683.3	9125.06	5291.59	0	0	1.06833	0.912506	0.529159	0	0	3643.37	3108.82	1802.8	0	0		18831.8	47.0962	100	100	BioE_COM-S	47.0962	9962.74	8869.05	47.0962
LU	Luxembourg	11.5969	0	6.78488	100	100	100	12.3461	12.4804	0	0	0		LU	1544.9	1365.74	1365.74	1273.08	0	0	0	1197.13	1114.19	0	0	0	143.863	143.863	0	0	0	143.863	143.863	0	0	0		1365.74	100	100	100		100	0	1365.74	100
LV	Latvia	9	0	0.622084	72.5205	100	100	13.8538	13.9155	13.9155	0	0		LV	9679.42	8808.27	8808.27	8753.48	2420.47	0	0	7587.99	7535.39	2083.65	0	0	0.758799	0.753539	0.208365	0	0	3254.88	3232.31	893.783	0	0		8808.27	72.5205	100	100	BioE_COM-S	72.5205	2420.47	6387.81	72.5205
MT	Malta	9.88321	0	44.2768	100	100	100	11.9397	13.3252	0	0	0		MT	2499.07	2252.08	2252.08	1254.93	0	0	0	1983.19	1087.71	0	0	0	759.905	419.731	0	0	0	1002.04	553.241	0	0	0		2252.08	100	100	100		100	0	2252.08	100
NL	Netherlands	9.09461	0	1.36179	41.6959	93.349	100	2.50332	2.52407	2.21276	2.22289	0		NL	30883.6	28074.8	28074.8	27692.5	16368.8	1867.26	0	27372	26993.5	16006.6	1825.75	0	27320.5	26942	15965.4	1821.25	0	27320.5	26942	15965.4	1821.25	0		28074.8	41.6959	93.349	100	BioE_COM-S	41.6959	16368.8	11706.1	41.6959
PL	Poland	9.0831	0	5.76821	13.8489	32.6342	38.1627	20.7815	21.547	20.5253	12.2098	11.286		PL	582330	529436	529436	498897	456115	356659	327389	419411	391400	362496	313112	290440	392382	367424	342069	307493	290375	397620	372644	346719	307493	290375		529436	13.8489	32.6342	38.1627	BioE_COM-S	13.8489	456115	73320.9	13.8489
PT	Portugal	8.38597	0	11.0518	27.0398	40.794	29.2092	5.74489	6.06912	6.12082	6.19049	6.19165		PT	682739	625484	625484	556357	456355	370324	442785	589551	522591	428422	347399	415369	58.9551	52.2591	42.8422	34.7399	41.5369	35645.9	31700	26488.1	22108.2	26174.1		625484	27.0398	40.794	29.2092	BioE_COM-S	27.0398	456355	169130	27.0398
RO	Romania	10.0302	0	31.0192	74.0917	87.0303	84.4859	5.18974	5.27506	5.05387	5	5		RO	507985	457032	457032	315265	118409	59275.9	70904.3	433314	298634	112425	56312.1	67359	161608	118977	45017.7	22879.6	26085.8	279404	195574	76227.6	38405	46008.7		457032	74.0917	87.0303	84.4859	BioE_COM-S	74.0917	118409	338623	74.0917
SE	Sweden	9.21835	0	0.539252	54.9595	100	100	8.89049	8.93327	5.44231	0	0		SE	2844.44	2582.23	2582.23	2568.31	1163.05	0	0	2352.66	2338.88	1099.75	0	0	2319.71	2305.92	1099.75	0	0	2352.66	2338.88	1099.75	0	0		2582.23	54.9595	100	100	BioE_COM-S	54.9595	1163.05	1419.18	54.9595
SI	Slovenia	10.8266	0	15.976	57.518	83.2767	86.7602	14.0145	14.4899	14.7547	15.6335	16.7687		SI	38888.2	34677.9	34677.9	29137.8	14731.9	5799.28	4591.3	29818	24915.8	12558.2	4892.65	3821.4	2.9818	2.49158	1.25582	0.489265	0.38214	7049.52	6134.85	2980.36	1014.69	641.177		34677.9	57.518	83.2767	86.7602	BioE_COM-S	57.518	14731.9	19946	57.518
SK	Slovakia	10.3084	0	1.34257	91.3051	100	100	14.7086	14.803	8.88362	0	0		SK	27034.7	24247.9	24247.9	23922.3	2108.34	0	0	20681.4	20381.1	1921.04	0	0	9235.76	9113.53	607.359	0	0	12711.5	12543.3	920.954	0	0		24247.9	91.3051	100	100	BioE_COM-S	91.3051	2108.34	22139.6	91.3051
UK	United Kingdom	9.2554	0	0.297897	43.4502	55.1907	55.1907	6.35945	6.37547	6.37359	5.3206	5.3206		UK	35931.1	32605.6	32605.6	32508.4	18438.4	14610.3	14610.3	30532	30435.9	17263.2	13833	13833	25788.8	25727.2	13704	12702.3	12702.3	29166.8	29070.7	16951.3	13791.5	13791.5		32605.6	43.4502	55.1907	55.1907	BioE_COM-S	43.4502	18438.4	14167.2	43.4502
EU28	EU28	8.46275	0	12.2789	30.5069	41.6514	37.3472	14.84	15.4766	15.4959	15.3437	15.2945		EU28	1.36763e+07	1.25189e+07	1.25189e+07	1.09818e+07	8.69981e+06	7.30463e+06	7.84348e+06	1.06611e+07	9.28215e+06	7.35169e+06	6.18383e+06	6.64385e+06	2.74784e+06	2.52906e+06	2.01265e+06	1.6929e+06	1.74367e+06	5.41871e+06	4.90421e+06	3.93627e+06	3.30318e+06	3.50065e+06		1.25189e+07	30.5069	41.6514	37.3472	BioE_COM-S	30.5069	8.69981e+06	3.81914e+06	30.5069

## Sheet: NUTs0 (energy)
Country (NUTs0)		BioTH (PJ·yr-1)						BioT (PJ·yr-1)							Country (NUTs0)		Theoretical	Technical	Economic potential (PJ·yr-1)					Implementation potential (PJ·yr-1)
		Fruit	Nuts	Citrus	Olive	Vineyard	TOTAL	Fruit	Nuts	Citrus	Olive	Vineyard	TOTAL				BioTH	BioT	BioE_Waste	BioE_SELF	BioE_COM-S	BioE_COM-M	BioE_COM-L	BioI_Waste	BioI_SELF	BioI_COM-S	BioI_COM-M	BioI_COM-L
AT	Austria	0.454969	0	0	0	0.828851	1.28382	0.414014	0	0	0	0.729297	1.14331		AT	Austria	1.28382	1.14331	1.14331	1.07503	0.693178	0.19016	0.172409	1.00377	0.939259	0.604456	0.164306	0.149189
BE	Belgium	0.578896	0	0	0	0	0.578896	0.526794	0	0	0	0	0.526794		BE	Belgium	0.578896	0.526794	0.526794	0.522813	0.40839	0.411608	0.411011	0.513407	0.509476	0.398687	0.401855	0.40139
BG	Bulgaria	1.35648	0.127381	0	0	0.931883	2.41574	1.23298	0.114528	0	0	0.818988	2.1665		BG	Bulgaria	2.41574	2.1665	2.1665	1.65167	0.302555	0.0569719	0.00126753	1.98413	1.49753	0.279623	0.052719	0.00116746
CY	Cyprus	0.159723	0.0482071	0.191444	0.271591	0.153037	0.824003	0.144148	0.043027	0.170868	0.25857	0.133548	0.750161		CY	Cyprus	0.824003	0.750161	0.750161	0.388437	0.250598	0.136783	0.165806	0.62204	0.323279	0.208573	0.113832	0.137987
CZ	Czech	0.602251	0	0	0	0.254296	0.856547	0.548059	0	0	0	0.22378	0.771839		CZ	Czech	0.856547	0.771839	0.771839	0.75023	0.121401	0	0	0.586628	0.566086	0.0936558	0	0
DE	Germany	1.83986	0.00573046	0	0	1.72458	3.57017	1.67428	0.00516389	0	0	1.51763	3.19708		DE	Germany	3.57017	3.19708	3.19708	3.03582	2.01396	1.4942	1.34356	2.8981	2.61507	1.74879	1.31049	1.18543
DK	Denmark	0.0540927	8.09388e-05	0	0	0	0.0541736	0.0492324	8.09388e-05	0	0	0	0.0493134		DK	Denmark	0.0541736	0.0493134	0.0493134	0.0488322	0.0102874	0	0	0.0401542	0.0396565	0.00822996	0	0
EE	Estonia	0.0298579	0	0	0	0	0.0298579	0.0271707	0	0	0	0	0.0271707		EE	Estonia	0.0298579	0.0271707	0.0271707	0.0260428	0	0	0	0.000215641	0	0	0	0
EL	Greece	2.94766	0.364257	1.22632	15.4736	1.80657	21.8184	2.68237	0.327834	1.1037	14.8547	1.58978	20.5584		EL	Greece	21.8184	20.5584	20.5584	15.5097	10.5342	10.5342	10.5342	14.7789	11.0206	7.58722	7.58722	7.58722
ES	Spain	7.9311	5.32821	8.7818	45.6096	15.8822	83.5329	7.1265	4.7801	7.87161	43.5477	13.939	77.2649		ES	Spain	83.5329	77.2649	77.2649	73.1235	60.2435	51.3971	57.0702	69.7091	65.7728	54.221	46.4014	51.3138
FI	Finland	0.0184124	0	0	0	0	0.0184124	0.0137844	0	0	0	0	0.0137844		FI	Finland	0.0184124	0.0137844	0.0137844	0.0132702	0.0079953	0.00207347	0.00104503	0.00930573	0.0089408	0.00539102	0.00139337	0.000696685
FR	France	5.74041	0.452707	0.218793	0.347231	14.8454	21.6045	5.20882	0.405584	0.19574	0.332269	13.0432	19.1856		FR	France	21.6045	19.1856	19.1856	18.7356	15.9355	13.3093	13.8725	16.6133	16.1994	13.7417	11.4443	11.9125
HR	Croatia	0.911414	0.105641	0.0401389	0.337577	0.565469	1.96024	0.82262	0.094844	0.0343152	0.307852	0.485033	1.74466		HR	Croatia	1.96024	1.74466	1.74466	1.19213	0.835122	0.187605	0	1.47648	0.993345	0.700258	0.157874	0
HU	Hungary	3.11098	0.101902	0	0	1.06692	4.2798	2.831	0.0917036	0	0	0.938891	3.86159		HU	Hungary	4.2798	3.86159	3.86159	3.16954	1.8202	0.945631	1.18745	3.63562	2.95293	1.70776	0.891352	1.12074
IE	Ireland	0.0156754	0	0	0	0	0.0156754	0.0142655	0	0	0	0	0.0142655		IE	Ireland	0.0156754	0.0142655	0.0142655	0.0142655	0.00968725	0.00593841	0.00801188	0.0141162	0.0141162	0.00958772	0.00588865	0.00792894
IT	Italy	9.25339	2.08344	3.59592	23.7875	13.3285	52.0487	8.18949	1.84398	3.18896	22.5674	11.5296	47.3194		IT	Italy	52.0487	47.3194	47.3194	37.9814	33.1015	29.2052	31.188	37.0256	28.5157	24.8469	21.9101	23.3675
LT	Lithuania	0.342056	0.00119789	0	0	0	0.343254	0.311286	0.00106839	0	0	0	0.312354		LT	Lithuania	0.343254	0.312354	0.312354	0.284953	0.16525	0	0	0.177192	0.15135	0.087775	0	0
LU	Luxembourg	0.00345025	0	0	0	0.0225789	0.0260292	0.00313508	0	0	0	0.0198769	0.023012		LU	Luxembourg	0.0260292	0.023012	0.023012	0.0214453	0	0	0	0.020165	0.0187667	0	0	0
LV	Latvia	0.160553	0	0	0	0	0.160553	0.146105	0	0	0	0	0.146105		LV	Latvia	0.160553	0.146105	0.146105	0.145193	0.0401424	0	0	0.125868	0.124989	0.0345689	0	0
MT	Malta	0.015775	0	0.00667642	0.00333414	0.0157394	0.0415249	0.0143484	0	0.00601682	0.00320144	0.013848	0.0374146		MT	Malta	0.0415249	0.0374146	0.0374146	0.0208505	0	0	0	0.0329455	0.018076	0	0	0
NL	Netherlands	0.511035	0.000194253	0	0	0.00106393	0.512294	0.46459	0.000178065	0	0	0.000945714	0.465713		NL	Netherlands	0.512294	0.465713	0.465713	0.459377	0.271532	0.0309702	0	0.454052	0.447782	0.265527	0.03029	0
PL	Poland	9.231	0.413613	0	0	0.00479612	9.64941	8.3976	0.371234	0	0	0.00422194	8.77305		PL	Poland	9.64941	8.77305	8.77305	8.26701	7.55808	5.91004	5.42502	6.94988	6.48572	6.00676	5.18844	4.81275
PT	Portugal	1.40752	1.23474	0.44732	4.88164	3.36933	11.3405	1.2646	1.10629	0.400295	4.67239	2.94435	10.3879		PT	Portugal	11.3405	10.3879	10.3879	9.23987	7.57905	6.15027	7.35369	9.79115	8.67909	7.11515	5.76953	6.89837
RO	Romania	5.58052	0.0263537	0	0	2.86979	8.47666	5.07668	0.0236989	0	0	2.52504	7.62542		RO	Romania	8.47666	7.62542	7.62542	5.26009	1.97561	0.988999	1.18301	7.22969	4.9826	1.87577	0.939546	1.12386
SE	Sweden	0.0471756	0	0	0	0	0.0471756	0.0428296	0	0	0	0	0.0428296		SE	Sweden	0.0471756	0.0428296	0.0428296	0.0425973	0.0192916	0	0	0.039031	0.0387987	0.0182465	0	0
SI	Slovenia	0.33061	0.00917845	0	0.0164882	0.293779	0.650056	0.298861	0.00820719	0	0.0157252	0.256795	0.579589		SI	Slovenia	0.650056	0.579589	0.579589	0.486996	0.246223	0.0969213	0.0767314	0.498362	0.416432	0.209887	0.0817789	0.0638621
SK	Slovakia	0.253378	0.00286523	0	0	0.195611	0.451854	0.230537	0.00257385	0	0	0.172103	0.405213		SK	Slovakia	0.451854	0.405213	0.405213	0.399766	0.0352272	0	0	0.345605	0.340591	0.0321022	0	0
UK	United Kingdom	0.579194	0	0	0	0.0171242	0.596319	0.526064	0	0	0	0.015047	0.541111		UK	United Kingdom	0.596319	0.541111	0.541111	0.539485	0.305987	0.242459	0.242459	0.506692	0.505099	0.286487	0.229565	0.229565
EU28		53.4674	10.3057	14.5084	90.7286	58.1774	227.188	48.2822	9.22009	12.9715	86.5597	50.901	207.934		EU28		227.188	207.934	207.934	182.406	144.484	121.296	130.236	177.081	154.177	122.094	102.682	110.314
