# Supplementary material
Source: MDPI journal article supplement (https://www.mdpi.com/1996-1073/12/8/1513)
Supplement: s1 [file s1 › Table(S3)_NUTs3_EU28Values.xls]

## Sheet: FRUIT
FRUIT				CRT_SLOPE	CRT_LOSS	CRE_WASTE	CRE_SELF	CRE_>2ha	CRE_COM-S	CRE_>2ha	CRE_COM-M	CRE_>2ha	CRE_COM-L	CRI_COMP	CRI_>0ha	CRI_>2ha		BioTH	BioT	BioE_WASTE	BioE_SELF	BioE_COM-S	BioE_COM-M	BioE_COM-L	BioI_WASTE	BioI_SELF	BioI_COM-S	BioI_COM-M	BioI_COM-L		BioT	CRE_COM			Best economic case	CR BEST Economic	BioE_COM_BEST	GAP = BioT - BioE_COM_BEST
Country	NUTs2	NUTs3	NAME	(%)	(%)	(%)	(%)	(%)	(%)	(%)	(%)	(%)	(%)	(%)	(%)	(%)		t DM·yr-1	t DM·yr-1	t DM·yr-1	t DM·yr-1	t DM·yr-1	t DM·yr-1	t DM·yr-1	t DM·yr-1	t DM·yr-1	t DM·yr-1	t DM·yr-1	t DM·yr-1		(DM t)	S	M	L		(%)	(DM t)	(DM t)	(%)
AT	AT11	AT111	Mittelburgenland	0	9	0	8.82353	8.82353	45.5161	8.82353	100	8.82353	100	0	20.5882	21.5054		212.276	193.171	193.171	176.126	95.9605	0	0	153.4	138.25	75.3238	0	0		193.171	45.5161	100	100	BioE_COM-S	45.5161	95.9605	97.2102	50.3235
AT	AT11	AT112	Nordburgenland	0	9	0	8.82353	8.82353	26.2828	8.82353	68.404	8.82353	75.5152	0	20.5882	21.5054		1380.37	1256.14	1256.14	1145.3	844.284	361.869	280.426	997.521	899.001	662.718	284.048	220.119		1256.14	26.2828	68.404	75.5152	BioE_COM-S	26.2828	844.284	411.853	32.7873
AT	AT11	AT113	Sudburgenland	0	9	0	8.82353	6.88073	100	6.88073	100	6.88073	100	0	20.5882	21.5054		1176.16	1070.3	1070.3	975.866	0	0	0	849.948	766.002	0	0	0		1070.3	100	100	100		100	0	1070.3	100
AT	AT12	AT121	Mostviertel-Eisenwurzen	0	9	0	6.88073	6.88073	0	6.88073	0	6.88073	0	0	26.1468	27.5862		298.156	271.322	271.322	252.653	252.653	252.653	252.653	200.38	182.956	182.956	182.956	182.956		271.322	0	0	0	BioE_COM-S & BioE_COM-M & BioE_COM-L	0	252.653	18.6689	6.88073
AT	AT12	AT122	Niederosterreich-Sud	0	9	0	6.88073	6.88073	100	6.88073	100	6.88073	100	0	26.1468	27.5862		113.016	102.845	102.845	95.7683	0	0	0	75.9541	69.3494	0	0	0		102.845	100	100	100		100	0	102.845	100
AT	AT12	AT123	Sankt Polten	0	9	0	6.88073	6.88073	71.3514	6.88073	100	6.88073	32.973	0	26.1468	27.5862		631.619	574.773	574.773	535.224	153.335	0	358.745	424.488	387.576	111.035	0	259.781		574.773	71.3514	100	32.973	BioE_COM-L	32.973	358.745	216.028	37.5849
AT	AT12	AT124	Waldviertel	0.0807754	9	0	6.88073	6.88073	13.6914	6.88073	24.6769	6.88073	19.9919	0	26.1468	27.5862		1270.54	1155.25	1155.25	1075.76	928.477	810.299	860.699	853.193	779.002	672.346	586.769	623.265		1155.25	13.6914	24.6769	19.9919	BioE_COM-S	13.6914	928.477	226.778	19.6301
AT	AT12	AT125	Weinviertel	0	9	0	6.88073	6.88073	29.7019	6.88073	85.492	6.88073	98.9712	0	26.1468	27.5862		1094.91	996.373	996.373	927.815	652.236	134.608	9.54492	735.853	671.866	472.309	97.4746	6.91184		996.373	29.7019	85.492	98.9712	BioE_COM-S	29.7019	652.236	344.137	34.5389
AT	AT12	AT126	Wiener Umland/Nordteil	0	9	0	6.88073	6.88073	44.1387	6.88073	99.945	6.88073	88.1673	0	26.1468	27.5862		1153.94	1050.08	1050.08	977.831	546.229	0.538157	115.704	775.521	708.085	395.545	0.3897	83.7855		1050.08	44.1387	99.945	88.1673	BioE_COM-S	44.1387	546.229	503.855	47.9824
AT	AT12	AT127	Wiener Umland/Sudteil	0	9	0	6.88073	0	62.8445	0	100	0	100	0	26.1468	27.5862		400.527	364.479	364.479	339.4	135.424	0	0	269.18	245.773	98.0656	0	0		364.479	100	100	100	BioE_COM-S	62.8445	135.424	229.055	62.8445
AT	AT13	AT130	Wien	0	9	0	0	6.25	100	6.25	100	6.25	100	0	0	0		267.731	243.635	243.635	243.635	0	0	0	243.635	243.635	0	0	0		243.635	100	100	100		100	0	243.635	100
AT	AT21	AT211	Klagenfurt-Villach	0	9	0	6.25	6.25	0	6.25	0	6.25	0	0	18.75	20		112.732	102.586	102.586	96.1744	96.1744	96.1744	96.1744	83.3511	76.9395	76.9395	76.9395	76.9395		102.586	0	0	0	BioE_COM-S & BioE_COM-M & BioE_COM-L	0	96.1744	6.41163	6.25
AT	AT21	AT212	Oberkarnten	0	9	0	6.25	6.25	0	6.25	0	6.25	0	0	18.75	20		31.24	28.4284	28.4284	26.6517	26.6517	26.6517	26.6517	23.0981	21.3213	21.3213	21.3213	21.3213		28.4284	0	0	0	BioE_COM-S & BioE_COM-M & BioE_COM-L	0	26.6517	1.77678	6.25
AT	AT21	AT213	Unterkarnten	0	9	0	6.25	2.88154	0	2.88154	0	2.88154	0	0	18.75	20		142.179	129.383	129.383	121.296	125.654	125.654	125.654	105.123	97.0369	100.523	100.523	100.523		129.383	0	0	0	BioE_COM-S & BioE_COM-M & BioE_COM-L	0	125.654	3.72821	2.88154
AT	AT22	AT221	Graz	0	9	0	2.88154	2.88154	0	2.88154	0	2.88154	0	0	10.032	10.2198		1725.27	1570	1570	1524.76	1524.76	1524.76	1524.76	1412.5	1368.93	1368.93	1368.93	1368.93		1570	0	0	0	BioE_COM-S & BioE_COM-M & BioE_COM-L	0	1524.76	45.2401	2.88154
AT	AT22	AT222	Liezen	0	9	0	2.88154	2.88154	0	2.88154	0	2.88154	0	0	10.032	10.2198		15.0025	13.6523	13.6523	13.2589	13.2589	13.2589	13.2589	12.2827	11.9038	11.9038	11.9038	11.9038		13.6523	0	0	0	BioE_COM-S & BioE_COM-M & BioE_COM-L	0	13.2589	0.393395	2.88154
AT	AT22	AT223	Ostliche Obersteiermark	0	9	0	2.88154	2.88154	0	2.88154	0	2.88154	0	0	10.032	10.2198		30.0448	27.3408	27.3408	26.553	26.553	26.553	26.553	24.598	23.8393	23.8393	23.8393	23.8393		27.3408	0	0	0	BioE_COM-S & BioE_COM-M & BioE_COM-L	0	26.553	0.787835	2.88154
AT	AT22	AT224	Oststeiermark	0	9	0	2.88154	2.88154	86.5248	2.88154	100	2.88154	100	0	10.032	10.2198		17558.8	15978.5	15978.5	15518.1	2091.09	0	0	14375.5	13932.2	1877.38	0	0		15978.5	86.5248	100	100	BioE_COM-S	86.5248	2091.09	13887.4	86.9131
AT	AT22	AT225	West- und Sudsteiermark	0	9	0	2.88154	2.88154	22.2222	2.88154	99.7222	2.88154	100	0	10.032	10.2198		1751.22	1593.61	1593.61	1547.69	1203.76	4.29914	0	1433.74	1389.52	1080.74	3.85978	0		1593.61	22.2222	99.7222	100	BioE_COM-S	22.2222	1203.76	389.852	24.4634
AT	AT22	AT226	Westliche Obersteiermark	0	9	0	2.88154	2.73973	0	2.73973	0	2.73973	0	0	10.032	10.2198		30.0794	27.3722	27.3722	26.5835	26.6223	26.6223	26.6223	24.6262	23.8667	23.9015	23.9015	23.9015		27.3722	0	0	0	BioE_COM-S & BioE_COM-M & BioE_COM-L	0	26.6223	0.749924	2.73973
AT	AT31	AT311	Innviertel	0	9	0	2.73973	2.73973	0	2.73973	0	2.73973	0	0	23.2877	23.9437		300.036	273.033	273.033	265.553	265.553	265.553	265.553	209.45	201.97	201.97	201.97	201.97		273.033	0	0	0	BioE_COM-S & BioE_COM-M & BioE_COM-L	0	265.553	7.48035	2.73973
AT	AT31	AT312	Linz-Wels	0	9	0	2.73973	2.73973	0	2.73973	0	2.73973	0	0	23.2877	23.9437		920.391	837.556	837.556	814.609	814.609	814.609	814.609	642.509	619.562	619.562	619.562	619.562		837.556	0	0	0	BioE_COM-S & BioE_COM-M & BioE_COM-L	0	814.609	22.9467	2.73973
AT	AT31	AT313	Muhlviertel	0	9	0	2.73973	2.73973	0	2.73973	0	2.73973	0	0	23.2877	23.9437		118.282	107.636	107.636	104.687	104.687	104.687	104.687	82.5704	79.6215	79.6215	79.6215	79.6215		107.636	0	0	0	BioE_COM-S & BioE_COM-M & BioE_COM-L	0	104.687	2.94894	2.73973
AT	AT31	AT314	Steyr-Kirchdorf	0	9	0	2.73973	2.73973	0	2.73973	0	2.73973	0	0	23.2877	23.9437		121.48	110.547	110.547	107.518	107.518	107.518	107.518	84.803	81.7743	81.7743	81.7743	81.7743		110.547	0	0	0	BioE_COM-S & BioE_COM-M & BioE_COM-L	0	107.518	3.02868	2.73973
AT	AT31	AT315	Traunviertel	0	9	0	2.73973	0	0	0	0	0	0	0	23.2877	23.9437		69.3906	63.1454	63.1454	61.4154	63.1454	63.1454	63.1454	48.4403	46.7103	48.0261	48.0261	48.0261		63.1454	100	100	100	BioE_COM-S & BioE_COM-M & BioE_COM-L	0	63.1454	0	0
AT	AT32	AT321	Lungau	0	9	0	0	0	0	0	0	0	0	0	100	100		0	0	0	0	0	0	0	0	0	0	0	0		0	100	100	100		0	0	0	0
AT	AT32	AT322	Pinzgau-Pongau	0	9	0	0	0	0	0	0	0	0	0	100	100		15	13.65	13.65	13.65	13.65	13.65	13.65	0	0	0	0	0		13.65	100	100	100	BioE_COM-S & BioE_COM-M & BioE_COM-L	0	13.65	0	0
AT	AT32	AT323	Salzburg Und Umgebung	0	9	0	0	21.0526	0	21.0526	0	21.0526	0	0	100	100		52.5271	47.7997	47.7997	47.7997	37.7366	37.7366	37.7366	0	0	0	0	0		47.7997	0	0	0	BioE_COM-S & BioE_COM-M & BioE_COM-L	0	37.7366	10.0631	21.0526
AT	AT33	AT331	Ausserfern	0	9	0	21.0526	21.0526	0	21.0526	0	21.0526	0	0	15.7895	20		0	0	0	0	0	0	0	0	0	0	0	0		0	0	0	0		0	0	0	0
AT	AT33	AT332	Innsbruck	0	9	0	21.0526	21.0526	0	21.0526	0	21.0526	0	0	15.7895	20		121.477	110.544	110.544	87.2716	87.2716	87.2716	87.2716	93.0897	69.8173	69.8173	69.8173	69.8173		110.544	0	0	0	BioE_COM-S & BioE_COM-M & BioE_COM-L	0	87.2716	23.2724	21.0526
AT	AT33	AT333	Osttirol	0	9	0	21.0526	21.0526	0	21.0526	0	21.0526	0	0	15.7895	20		30	27.3	27.3	21.5526	21.5526	21.5526	21.5526	22.9895	17.2421	17.2421	17.2421	17.2421		27.3	0	0	0	BioE_COM-S & BioE_COM-M & BioE_COM-L	0	21.5526	5.74737	21.0526
AT	AT33	AT334	Tiroler Oberland	0	9	0	21.0526	21.0526	0	21.0526	0	21.0526	0	0	15.7895	20		120	109.2	109.2	86.2105	86.2105	86.2105	86.2105	91.9579	68.9684	68.9684	68.9684	68.9684		109.2	0	0	0	BioE_COM-S & BioE_COM-M & BioE_COM-L	0	86.2105	22.9895	21.0526
AT	AT33	AT335	Tiroler Unterland	0	9	0	21.0526	16.6667	0	16.6667	0	16.6667	0	0	15.7895	20		30.9625	28.1758	28.1758	22.2441	23.4799	23.4799	23.4799	23.727	17.7953	18.7839	18.7839	18.7839		28.1758	0	0	0	BioE_COM-S & BioE_COM-M & BioE_COM-L	0	23.4799	4.69597	16.6667
AT	AT34	AT341	Bludenz-Bregenzer Wald	0	9	0	16.6667	16.6667	0	16.6667	0	16.6667	0	0	16.6667	20		0	0	0	0	0	0	0	0	0	0	0	0		0	0	0	0		0	0	0	0
AT	AT34	AT342	Rheintal-Bodenseegebiet	0	9	0	16.6667	0	0	0	0	0	0	0	16.6667	20		118.462	107.801	107.801	89.8338	107.801	107.801	107.801	89.8338	71.8671	86.2405	86.2405	86.2405		107.801	100	100	100	BioE_COM-S & BioE_COM-M & BioE_COM-L	0	107.801	0	0
BE	BE10	BE100	Arr. de Bruxelles-Capitale / Arr. van Brussel-Hoofdstad	0	9	0	0	2.7027	0	2.7027	0	2.7027	0	1	0	0		0	0	0	0	0	0	0	0	0	0	0	0		0	0	0	0		0	0	0	0
BE	BE21	BE211	Arr. Antwerpen	0	9	0	2.7027	2.7027	100	2.7027	100	2.7027	100	1	0	0		387.79	352.889	352.889	343.352	0	0	0	349.36	339.918	0	0	0		352.889	100	100	100		100	0	352.889	100
BE	BE21	BE212	Arr. Mechelen	0	9	0	2.7027	2.7027	0	2.7027	0	2.7027	0	1	0	0		0	0	0	0	0	0	0	0	0	0	0	0		0	0	0	0		0	0	0	0
BE	BE21	BE213	Arr. Turnhout	0	9	0	2.7027	0.783875	100	0.783875	100	0.783875	100	1	0	0		336.899	306.578	306.578	298.292	0	0	0	303.512	295.309	0	0	0		306.578	100	100	100		100	0	306.578	100
BE	BE22	BE221	Arr. Hasselt	0	9	0	0.783875	0.783875	1.58151	0.783875	0.364964	0.783875	0	1	1.00784	1.0158		11767.5	10708.4	10708.4	10624.5	10456.5	10585.7	10624.5	10494.5	10411.4	10246.8	10373.4	10411.4		10708.4	1.58151	0.364964	0	BioE_COM-L	0	10624.5	83.9407	0.783875
BE	BE22	BE222	Arr. Maaseik	0	9	0	0.783875	0.783875	100	0.783875	100	0.783875	100	1	1.00784	1.0158		203.131	184.849	184.849	183.4	0	0	0	181.157	179.722	0	0	0		184.849	100	100	100		100	0	184.849	100
BE	BE22	BE223	Arr. Tongeren	0	9	0	0.783875	0.763359	4.77941	0.763359	3.49265	0.763359	2.02206	1	1.00784	1.0158		7803.64	7101.31	7101.31	7045.64	6710.29	6800.97	6904.6	6959.44	6904.33	6575.71	6664.57	6766.12		7101.31	4.77941	3.49265	2.02206	BioE_COM-L	2.02206	6904.6	196.705	2.76998
BE	BE23	BE231	Arr. Aalst	0	9	0	0.763359	0.763359	100	0.763359	100	0.763359	100	1	0	0		187.098	170.259	170.259	168.959	0	0	0	168.557	167.27	0	0	0		170.259	100	100	100		100	0	170.259	100
BE	BE23	BE232	Arr. Dendermonde	0	9	0	0.763359	0.763359	100	0.763359	100	0.763359	100	1	0	0		0	0	0	0	0	0	0	0	0	0	0	0		0	100	100	100		0	0	0	0
BE	BE23	BE233	Arr. Eeklo	0	9	0	0.763359	0.763359	100	0.763359	100	0.763359	100	1	0	0		239.319	217.781	217.781	216.118	0	0	0	215.603	213.957	0	0	0		217.781	100	100	100		100	0	217.781	100
BE	BE23	BE234	Arr. Gent	0	9	0	0.763359	0.763359	0	0.763359	0	0.763359	0	1	0	0		251.576	228.934	228.934	227.187	227.187	227.187	227.187	226.645	224.915	224.915	224.915	224.915		228.934	0	0	0	BioE_COM-S & BioE_COM-M & BioE_COM-L	0	227.187	1.74759	0.763359
BE	BE23	BE235	Arr. Oudenaarde	0	9	0	0.763359	0.763359	0	0.763359	0	0.763359	0	1	0	0		107.999	98.279	98.279	97.5287	97.5287	97.5287	97.5287	97.2962	96.5535	96.5535	96.5535	96.5535		98.279	0	0	0	BioE_COM-S & BioE_COM-M & BioE_COM-L	0	97.5287	0.750221	0.763359
BE	BE23	BE236	Arr. Sint-Niklaas	0	9	0	0.763359	0.787402	100	0.787402	100	0.787402	100	1	0	0		2093.89	1905.44	1905.44	1890.89	0	0	0	1886.38	1871.98	0	0	0		1905.44	100	100	100		100	0	1905.44	100
BE	BE24	BE241	Arr. Halle-Vilvoorde	0	9	0	0.787402	0.787402	0	0.787402	0	0.787402	0	1	2.3622	2.38095		540.233	491.612	491.612	487.741	487.741	487.741	487.741	475.199	471.367	471.367	471.367	471.367		491.612	0	0	0	BioE_COM-S & BioE_COM-M & BioE_COM-L	0	487.741	3.87096	0.787402
BE	BE24	BE242	Arr. Leuven	0	9	0	0.787402	0	12.2449	0	12.5	0	17.602	1	2.3622	2.38095		8605.49	7830.99	7830.99	7769.33	6872.1	6852.12	6452.58	7569.55	7508.5	6641.39	6622.08	6235.96		7830.99	100	100	100	BioE_COM-S	12.2449	6872.1	958.897	12.2449
BE	BE25	BE251	Arr. Brugge	0	9	0	0	0	100	0	100	0	100	1	21.4286	21.4286		18.5847	16.9121	16.9121	16.9121	0	0	0	13.1552	13.1552	0	0	0		16.9121	100	100	100		100	0	16.9121	100
BE	BE25	BE252	Arr. Diksmuide	0	9	0	0	0	100	0	100	0	100	1	21.4286	21.4286		0	0	0	0	0	0	0	0	0	0	0	0		0	100	100	100		0	0	0	0
BE	BE25	BE253	Arr. Ieper	0	9	0	0	0	100	0	100	0	100	1	21.4286	21.4286		173.46	157.849	157.849	157.849	0	0	0	122.784	122.784	0	0	0		157.849	100	100	100		100	0	157.849	100
BE	BE25	BE254	Arr. Kortrijk	0	9	0	0	0	0	0	0	0	0	1	21.4286	21.4286		102.098	92.9089	92.9089	92.9089	92.9089	92.9089	92.9089	72.2698	72.2698	72.2698	72.2698	72.2698		92.9089	100	100	100	BioE_COM-S & BioE_COM-M & BioE_COM-L	0	92.9089	0	0
BE	BE25	BE255	Arr. Oostende	0	9	0	0	0	0	0	0	0	0	1	21.4286	21.4286		0	0	0	0	0	0	0	0	0	0	0	0		0	100	100	100		0	0	0	0
BE	BE25	BE256	Arr. Roeselare	0	9	0	0	0	100	0	100	0	100	1	21.4286	21.4286		107.133	97.4915	97.4915	97.4915	0	0	0	75.8344	75.8344	0	0	0		97.4915	100	100	100		100	0	97.4915	100
BE	BE25	BE257	Arr. Tielt	0	9	0	0	0	0	0	0	0	0	1	21.4286	21.4286		251.257	228.644	228.644	228.644	228.644	228.644	228.644	177.852	177.852	177.852	177.852	177.852		228.644	100	100	100	BioE_COM-S & BioE_COM-M & BioE_COM-L	0	228.644	0	0
BE	BE25	BE258	Arr. Veurne	0	9	0	0	0	0	0	0	0	0	1	21.4286	21.4286		0	0	0	0	0	0	0	0	0	0	0	0		0	100	100	100		0	0	0	0
BE	BE31	BE310	Arr. Nivelles	0	9	0	0	0	0	0	0	0	0	1	0	0		340.746	310.079	310.079	310.079	310.079	310.079	310.079	306.978	306.978	306.978	306.978	306.978		310.079	100	100	100	BioE_COM-S & BioE_COM-M & BioE_COM-L	0	310.079	0	0
BE	BE32	BE321	Arr. Ath	0	9	0	0	0	0	0	0	0	0	1	0	0		0	0	0	0	0	0	0	0	0	0	0	0		0	100	100	100		0	0	0	0
BE	BE32	BE322	Arr. Charleroi	0	9	0	0	0	0	0	0	0	0	1	0	0		38.262	34.8184	34.8184	34.8184	34.8184	34.8184	34.8184	34.4703	34.4703	34.4703	34.4703	34.4703		34.8184	100	100	100	BioE_COM-S & BioE_COM-M & BioE_COM-L	0	34.8184	0	0
BE	BE32	BE323	Arr. Mons	0	9	0	0	0	0	0	0	0	0	1	0	0		0	0	0	0	0	0	0	0	0	0	0	0		0	100	100	100		0	0	0	0
BE	BE32	BE324	Arr. Mouscron	0	9	0	0	0	0	0	0	0	0	1	0	0		0	0	0	0	0	0	0	0	0	0	0	0		0	100	100	100		0	0	0	0
BE	BE32	BE325	Arr. Soignies	0	9	0	0	0	0	0	0	0	0	1	0	0		0	0	0	0	0	0	0	0	0	0	0	0		0	100	100	100		0	0	0	0
BE	BE32	BE326	Arr. Thuin	0	9	0	0	0	0	0	0	0	0	1	0	0		0	0	0	0	0	0	0	0	0	0	0	0		0	100	100	100		0	0	0	0
BE	BE32	BE327	Arr. Tournai	0	9	0	0	0	0	0	0	0	0	1	0	0		0	0	0	0	0	0	0	0	0	0	0	0		0	100	100	100		0	0	0	0
BE	BE33	BE331	Arr. Huy	0	9	0	0	0	100	0	100	0	100	1	0	0		287.568	261.687	261.687	261.687	0	0	0	259.07	259.07	0	0	0		261.687	100	100	100		100	0	261.687	100
BE	BE33	BE332	Arr. Liege	0	9	0	0	0	100	0	100	0	100	1	0	0		912.637	830.5	830.5	830.5	0	0	0	822.195	822.195	0	0	0		830.5	100	100	100		100	0	830.5	100
BE	BE33	BE334	Arr. Waremme	0	9	0	0	0	27.6596	0	27.6596	0	0	1	0	0		523.099	476.02	476.02	476.02	344.355	344.355	476.02	471.26	471.26	340.911	340.911	471.26		476.02	100	100	100	BioE_COM-L	0	476.02	0	0
BE	BE33	BE335	Arr. Verviers - Communes francophones	0	9	0	0	0	0	0	0	0	0	1	0	0		111.569	101.528	101.528	101.528	101.528	101.528	101.528	100.512	100.512	100.512	100.512	100.512		101.528	100	100	100	BioE_COM-S & BioE_COM-M & BioE_COM-L	0	101.528	0	0
BE	BE33	BE336	Bezirk Verviers - Deutschsprachige Gemeinschaft	0	9	0	0	0	0	0	0	0	0	1	0	0		0	0	0	0	0	0	0	0	0	0	0	0		0	100	100	100		0	0	0	0
BE	BE34	BE341	Arr. Arlon	0	9	0	0	0	0	0	0	0	0	1	0	0		0	0	0	0	0	0	0	0	0	0	0	0		0	100	100	100		0	0	0	0
BE	BE34	BE342	Arr. Bastogne	0	9	0	0	0	0	0	0	0	0	1	0	0		0	0	0	0	0	0	0	0	0	0	0	0		0	100	100	100		0	0	0	0
BE	BE34	BE343	Arr. Marche-en-Famenne	0	9	0	0	0	0	0	0	0	0	1	0	0		0	0	0	0	0	0	0	0	0	0	0	0		0	100	100	100		0	0	0	0
BE	BE34	BE344	Arr. Neufchateau	0	9	0	0	0	0	0	0	0	0	1	0	0		0	0	0	0	0	0	0	0	0	0	0	0		0	100	100	100		0	0	0	0
BE	BE34	BE345	Arr. Virton	0	9	0	0	0	0	0	0	0	0	1	0	0		0	0	0	0	0	0	0	0	0	0	0	0		0	100	100	100		0	0	0	0
BE	BE35	BE351	Arr. Dinant	0	9	0	0	0	100	0	100	0	100	1	0	0		0	0	0	0	0	0	0	0	0	0	0	0		0	100	100	100		0	0	0	0
BE	BE35	BE352	Arr. Namur	0	9	0	0	0	100	0	100	0	100	1	0	0		403.651	367.323	367.323	367.323	0	0	0	363.649	363.649	0	0	0		367.323	100	100	100		100	0	367.323	100
BE	BE35	BE353	Arr. Philippeville	0	9	0	0	30.5466	0	30.5466	0	30.5466	0	1	0	0		0	0	0	0	0	0	0	0	0	0	0	0		0	0	0	0		0	0	0	0
BG	BG31	BG311	Vidin	0	9	0	30.5466	30.5466	100	30.5466	100	30.5466	100	7.75	5.46624	7.87037		330.438	300.699	300.699	208.845	0	0	0	262.232	177.497	0	0	0		300.699	100	100	100		100	0	300.699	100
BG	BG31	BG312	Montana	0	9	0	30.5466	30.5466	100	30.5466	100	30.5466	100	7.75	5.46624	7.87037		621.99	566.011	566.011	393.114	0	0	0	493.604	334.106	0	0	0		566.011	100	100	100		100	0	566.011	100
BG	BG31	BG313	Vratsa	0.598802	9	0	30.5466	30.5466	100	30.5466	100	30.5466	100	7.75	5.46624	7.87037		315.584	285.461	285.461	198.263	0	0	0	248.944	168.503	0	0	0		285.461	100	100	100		100	0	285.461	100
BG	BG31	BG314	Pleven	0	9	0	30.5466	30.5466	100	30.5466	100	30.5466	100	7.75	5.46624	7.87037		1110.22	1010.3	1010.3	701.687	0	0	0	881.056	596.361	0	0	0		1010.3	100	100	100		100	0	1010.3	100
BG	BG31	BG315	Lovech	0	9	0	30.5466	14.7627	100	14.7627	100	14.7627	100	7.75	5.46624	7.87037		5614.83	5109.49	5109.49	3548.72	0	0	0	4455.86	3016.04	0	0	0		5109.49	100	100	100		100	0	5109.49	100
BG	BG32	BG321	Veliko Tarnovo	0	9	0	14.7627	14.7627	100	14.7627	100	14.7627	100	7.75	11.0721	12.9897		1149.53	1046.07	1046.07	891.641	0	0	0	858.154	715.694	0	0	0		1046.07	100	100	100		100	0	1046.07	100
BG	BG32	BG322	Gabrovo	0	9	0	14.7627	14.7627	100	14.7627	100	14.7627	100	7.75	11.0721	12.9897		1205.93	1097.4	1097.4	935.394	0	0	0	900.264	750.813	0	0	0		1097.4	100	100	100		100	0	1097.4	100
BG	BG32	BG323	Ruse	0	9	0	14.7627	14.7627	99.5409	14.7627	100	14.7627	100	7.75	11.0721	12.9897		2321.22	2112.31	2112.31	1800.48	8.26665	0	0	1732.86	1445.19	6.6354	0	0		2112.31	99.5409	100	100	BioE_COM-S	99.5409	8.26665	2104.05	99.6086
BG	BG32	BG324	Razgrad	0	9	0	14.7627	14.7627	95.4128	14.7627	100	14.7627	100	7.75	11.0721	12.9897		2089.72	1901.65	1901.65	1620.91	74.3538	0	0	1560.04	1301.06	59.6816	0	0		1901.65	95.4128	100	100	BioE_COM-S	95.4128	74.3538	1827.29	96.09
BG	BG32	BG325	Silistra	0	9	0	14.7627	13.6986	92.9976	13.6986	100	13.6986	100	7.75	11.0721	12.9897		7275.23	6620.46	6620.46	5643.1	400.083	0	0	5431.16	4529.55	321.135	0	0		6620.46	92.9976	100	100	BioE_COM-S	92.9976	400.083	6220.38	93.9569
BG	BG33	BG331	Varna	0	9	0	13.6986	13.6986	100	13.6986	100	13.6986	100	7.75	11.6438	13.4921		1339.59	1219.03	1219.03	1052.04	0	0	0	993.613	839.564	0	0	0		1219.03	100	100	100		100	0	1219.03	100
BG	BG33	BG332	Dobrich	0	9	0	13.6986	13.6986	100	13.6986	100	13.6986	100	7.75	11.6438	13.4921		1758.65	1600.37	1600.37	1381.14	0	0	0	1304.44	1102.2	0	0	0		1600.37	100	100	100		100	0	1600.37	100
BG	BG33	BG333	Shumen	0	9	0	13.6986	13.6986	99.9347	13.6986	100	13.6986	100	7.75	11.6438	13.4921		1780.8	1620.52	1620.52	1398.53	0.912882	0	0	1320.87	1116.08	0.728512	0	0		1620.52	99.9347	100	100	BioE_COM-S	99.9347	0.912882	1619.61	99.9437
BG	BG33	BG334	Targovishte	0	9	0	13.6986	18.2116	100	18.2116	100	18.2116	100	7.75	11.6438	13.4921		2255.92	2052.88	2052.88	1771.67	0	0	0	1673.28	1413.85	0	0	0		2052.88	100	100	100		100	0	2052.88	100
BG	BG34	BG341	Burgas	0	9	0	18.2116	18.2116	63.8734	18.2116	94.8993	18.2116	99.5014	7.75	3.38059	4.13333		7301.62	6644.48	6644.48	5434.41	1963.27	277.192	27.0939	5922.32	4806.03	1736.25	245.14	23.961		6644.48	63.8734	94.8993	99.5014	BioE_COM-S	63.8734	1963.27	4681.21	70.4527
BG	BG34	BG342	Sliven	0.906344	9	0	18.2116	18.2116	85.6711	18.2116	100	18.2116	100	7.75	3.38059	4.13333		8038.14	7248.41	7248.41	5928.36	849.467	0	0	6460.61	5242.86	751.243	0	0		7248.41	85.6711	100	100	BioE_COM-S	85.6711	849.467	6398.94	88.2806
BG	BG34	BG343	Yambol	0	9	0	18.2116	18.2116	99.8726	18.2116	100	18.2116	100	7.75	3.38059	4.13333		1519.28	1382.54	1382.54	1130.76	1.44046	0	0	1232.28	1000.01	1.2739	0	0		1382.54	99.8726	100	100	BioE_COM-S	99.8726	1.44046	1381.1	99.8958
BG	BG34	BG344	Stara Zagora	0	9	0	18.2116	47.3904	72.4572	47.3904	100	47.3904	100	7.75	3.38059	4.13333		6036.34	5493.07	5493.07	4492.7	795.954	0	0	4896.05	3973.21	703.918	0	0		5493.07	72.4572	100	100	BioE_COM-S	72.4572	795.954	4697.12	85.5099
BG	BG41	BG411	Sofia (stolitsa)	0	9	0	47.3904	47.3904	100	47.3904	100	47.3904	100	7.75	1.25261	2.38095		75.2165	68.447	68.447	36.0097	0	0	0	62.3514	32.428	0	0	0		68.447	100	100	100		100	0	68.447	100
BG	BG41	BG412	Sofia	0	9	0	47.3904	47.3904	100	47.3904	100	47.3904	100	7.75	1.25261	2.38095		1349.49	1228.04	1228.04	646.067	0	0	0	1118.68	581.806	0	0	0		1228.04	100	100	100		100	0	1228.04	100
BG	BG41	BG413	Blagoevgrad	0.301594	9	0	47.3904	47.3904	86.9022	47.3904	100	47.3904	100	7.75	1.25261	2.38095		3107.76	2819.53	2819.53	1483.35	194.286	0	0	2568.44	1335.81	174.961	0	0		2819.53	86.9022	100	100	BioE_COM-S	86.9022	194.286	2625.25	93.1093
BG	BG41	BG414	Pernik	0	9	0	47.3904	47.3904	100	47.3904	100	47.3904	100	7.75	1.25261	2.38095		465.933	423.999	423.999	223.064	0	0	0	386.24	200.877	0	0	0		423.999	100	100	100		100	0	423.999	100
BG	BG41	BG415	Kyustendil	0	9	0	47.3904	24.0858	58.0904	24.0858	100	24.0858	100	7.75	1.25261	2.38095		5879.84	5350.65	5350.65	2814.96	1702.33	0	0	4874.15	2534.97	1533.01	0	0		5350.65	58.0904	100	100	BioE_COM-S	58.0904	1702.33	3648.32	68.1846
BG	BG42	BG421	Plovdiv	0.281081	9	0	24.0858	24.0858	60.4324	24.0858	80.2378	24.0858	100	7.75	2.14376	2.82392		13843.8	12562.5	12562.5	9536.69	3773.44	1884.66	0	11340.4	8549.16	3382.69	1689.5	0		12562.5	60.4324	80.2378	100	BioE_COM-S	60.4324	3773.44	8789.02	69.9626
BG	BG42	BG422	Haskovo	0	9	0	24.0858	24.0858	94.1903	24.0858	100	24.0858	100	7.75	2.14376	2.82392		2127.78	1936.28	1936.28	1469.91	85.3972	0	0	1747.93	1317.7	76.5543	0	0		1936.28	94.1903	100	100	BioE_COM-S	94.1903	85.3972	1850.88	95.5896
BG	BG42	BG423	Pazardzhik	0	9	0	24.0858	24.0858	50	24.0858	94.2083	24.0858	100	7.75	2.14376	2.82392		2832.51	2577.58	2577.58	1956.75	978.377	113.329	0	2326.85	1754.13	877.065	101.593	0		2577.58	50	94.2083	100	BioE_COM-S	50	978.377	1599.21	62.0429
BG	BG42	BG424	Smolyan	0	9	0	24.0858	24.0858	0	24.0858	0	24.0858	0	7.75	2.14376	2.82392		69.6187	63.353	63.353	48.094	48.094	48.094	48.094	57.1903	43.1138	43.1138	43.1138	43.1138		63.353	0	0	0	BioE_COM-S & BioE_COM-M & BioE_COM-L	0	48.094	15.259	24.0858
BG	BG42	BG425	Kardzhali	0	9	0	24.0858	58.7393	100	58.7393	100	58.7393	100	7.75	2.14376	2.82392		655.502	596.507	596.507	452.834	0	0	0	538.481	405.943	0	0	0		596.507	100	100	100		100	0	596.507	100
CY	CY00	CY000	Kypros	0.827433	9	0	58.7393	0	35.4841	0	64.7864	0	57.3156	10	2.00573	3.47222		9628.61	8689.53	8689.53	3585.37	5606.13	3059.9	3709.07	7663.72	3114.79	4870.32	2658.29	3222.26		8689.53	100	100	100	BioE_COM-S	35.4841	5606.13	3083.41	35.4841
CZ	CZ01	CZ010	Hlavni mesto Praha	0	9	0	0	0.746269	100	0.746269	100	0.746269	100	15	0	0		197.673	179.883	179.883	179.883	0	0	0	152.9	152.9	0	0	0		179.883	100	100	100		100	0	179.883	100
CZ	CZ02	CZ020	Stredocesky kraj	0	9	0	0.746269	1.74419	71.5206	1.74419	100	1.74419	100	15	5.72139	5.76441		8136.89	7404.57	7404.57	7349.31	2072	0	0	5933.79	5886.82	1659.67	0	0		7404.57	71.5206	100	100	BioE_COM-S	71.5206	2072	5332.58	72.0174
CZ	CZ03	CZ031	Jihocesky kraj	0	9	0	1.74419	1.74419	20.6587	1.74419	100	1.74419	100	15	19.7674	20.1183		1845.72	1679.61	1679.61	1650.31	1309.38	0	0	1145.45	1120.55	889.062	0	0		1679.61	20.6587	100	100	BioE_COM-S	20.6587	1309.38	370.229	22.0425
CZ	CZ03	CZ032	Plzensky kraj	0	9	0	1.74419	0	100	0	100	0	100	15	19.7674	20.1183		904.615	823.2	823.2	808.841	0	0	0	561.403	549.199	0	0	0		823.2	100	100	100		100	0	823.2	100
CZ	CZ04	CZ041	Karlovarsky kraj	0	9	0	0	0	100	0	100	0	100	15	19.5455	19.5455		90.0295	81.9269	81.9269	81.9269	0	0	0	56.0268	56.0268	0	0	0		81.9269	100	100	100		100	0	81.9269	100
CZ	CZ04	CZ042	Ustecky kraj	0	9	0	0	1.06952	100	1.06952	100	1.06952	100	15	19.5455	19.5455		4182.05	3805.66	3805.66	3805.66	0	0	0	2602.56	2602.56	0	0	0		3805.66	100	100	100		100	0	3805.66	100
CZ	CZ05	CZ051	Liberecky kraj	0	9	0	1.06952	1.06952	100	1.06952	100	1.06952	100	15	10.1604	10.2703		1577.57	1435.59	1435.59	1420.24	0	0	0	1096.27	1083.22	0	0	0		1435.59	100	100	100		100	0	1435.59	100
CZ	CZ05	CZ052	Kralovehradecky kraj	0	9	0	1.06952	1.06952	44.6886	1.06952	100	1.06952	100	15	10.1604	10.2703		4468.44	4066.28	4066.28	4022.79	2225.06	0	0	3105.16	3068.19	1697.06	0	0		4066.28	44.6886	100	100	BioE_COM-S	44.6886	2225.06	1841.22	45.2802
CZ	CZ05	CZ053	Pardubicky kraj	0	9	0	1.06952	2.29885	100	2.29885	100	2.29885	100	15	10.1604	10.2703		658.767	599.478	599.478	593.066	0	0	0	457.783	452.333	0	0	0		599.478	100	100	100		100	0	599.478	100
CZ	CZ06	CZ063	Kraj Vysocina	0	9	0	2.29885	2.29885	0	2.29885	0	2.29885	0	15	26.2069	26.8235		388.157	353.223	353.223	345.102	345.102	345.102	345.102	221.556	214.654	214.654	214.654	214.654		353.223	0	0	0	BioE_COM-S & BioE_COM-M & BioE_COM-L	0	345.102	8.12006	2.29885
CZ	CZ06	CZ064	Jihomoravsky kraj	0	9	0	2.29885	1.45455	92.2699	1.45455	100	1.45455	100	15	26.2069	26.8235		9435.96	8586.72	8586.72	8389.33	654.112	0	0	5385.95	5218.16	406.857	0	0		8586.72	92.2699	100	100	BioE_COM-S	92.2699	654.112	7932.61	92.3823
CZ	CZ07	CZ071	Olomoucky kraj	0	9	0	1.45455	1.45455	100	1.45455	100	1.45455	100	15	36.3636	36.9004		2977.02	2709.09	2709.09	2669.69	0	0	0	1465.37	1431.88	0	0	0		2709.09	100	100	100		100	0	2709.09	100
CZ	CZ07	CZ072	Zlinsky kraj	0	9	0	1.45455	2.12766	100	2.12766	100	2.12766	100	15	36.3636	36.9004		2401.51	2185.37	2185.37	2153.59	0	0	0	1182.09	1155.07	0	0	0		2185.37	100	100	100		100	0	2185.37	100
CZ	CZ08	CZ080	Moravskoslezsky kraj	0	9	0	2.12766	0	100	0	100	0	100	15	63.8298	65.2174		839.261	763.727	763.727	747.478	0	0	0	234.806	220.993	0	0	0		763.727	100	100	100		100	0	763.727	100
DE	DE11	DE111	Stuttgart, Stadtkreis	0	9	0	7.56869	7.56869	62.4161	7.56869	100	7.56869	100	5	9.43494	9.871		0	0	0	0	0	0	0	0	0	0	0	0		0	62.4161	100	100		0	0	0	0
DE	DE11	DE112	Boblingen	0	9	0	7.56869	7.56869	98.4055	7.56869	100	7.56869	100	5	9.43494	9.871		0	0	0	0	0	0	0	0	0	0	0	0		0	98.4055	100	100		0	0	0	0
DE	DE11	DE113	Esslingen	0	9	0	7.56869	7.56869	83.5766	7.56869	100	7.56869	100	5	9.43494	9.871		0	0	0	0	0	0	0	0	0	0	0	0		0	83.5766	100	100		0	0	0	0
DE	DE11	DE114	Goppingen	0	9	0	7.56869	7.56869	100	7.56869	100	7.56869	100	5	9.43494	9.871		0	0	0	0	0	0	0	0	0	0	0	0		0	100	100	100		0	0	0	0
DE	DE11	DE115	Ludwigsburg	0	9	0	7.56869	7.56869	81.5504	7.56869	100	7.56869	100	5	9.43494	9.871		0	0	0	0	0	0	0	0	0	0	0	0		0	81.5504	100	100		0	0	0	0
DE	DE11	DE116	Rems-Murr-Kreis	0	9	0	7.56869	7.56869	71.0305	7.56869	100	7.56869	100	5	9.43494	9.871		0	0	0	0	0	0	0	0	0	0	0	0		0	71.0305	100	100		0	0	0	0
DE	DE11	DE117	Heilbronn, Stadtkreis	0	9	0	7.56869	7.56869	0	7.56869	100	7.56869	100	5	9.43494	9.871		0	0	0	0	0	0	0	0	0	0	0	0		0	0	100	100		0	0	0	0
DE	DE11	DE118	Heilbronn, Landkreis	0	9	0	7.56869	7.56869	29.5483	7.56869	100	7.56869	100	5	9.43494	9.871		0	0	0	0	0	0	0	0	0	0	0	0		0	29.5483	100	100		0	0	0	0
DE	DE11	DE119	Hohenlohekreis	0	9	0	7.56869	7.56869	100	7.56869	100	7.56869	100	5	9.43494	9.871		0	0	0	0	0	0	0	0	0	0	0	0		0	100	100	100		0	0	0	0
DE	DE11	DE11A	Schwabisch Hall	0	9	0	7.56869	7.56869	100	7.56869	100	7.56869	100	5	9.43494	9.871		0	0	0	0	0	0	0	0	0	0	0	0		0	100	100	100		0	0	0	0
DE	DE11	DE11B	Main-Tauber-Kreis	0	9	0	7.56869	7.56869	100	7.56869	100	7.56869	100	5	9.43494	9.871		0	0	0	0	0	0	0	0	0	0	0	0		0	100	100	100		0	0	0	0
DE	DE11	DE11C	Heidenheim	0	9	0	7.56869	7.56869	0	7.56869	0	7.56869	0	5	9.43494	9.871		0	0	0	0	0	0	0	0	0	0	0	0		0	0	0	0		0	0	0	0
DE	DE11	DE11D	Ostalbkreis	0	9	0	7.56869	7.57	100	7.57	100	7.57	100	5	9.43494	9.871		0	0	0	0	0	0	0	0	0	0	0	0		0	100	100	100		0	0	0	0
DE	DE12	DE121	Baden-Baden, Stadtkreis	0	9	0	7.57	7.57	56.7901	7.57	100	7.57	97.5309	5	0	9.87		0	0	0	0	0	0	0	0	0	0	0	0		0	56.7901	100	97.5309		0	0	0	0
DE	DE12	DE122	Karlsruhe, Stadtkreis	0	9	0	7.57	7.57	100	7.57	100	7.57	100	5	0	9.87		0	0	0	0	0	0	0	0	0	0	0	0		0	100	100	100		0	0	0	0
DE	DE12	DE123	Karlsruhe, Landkreis	0	9	0	7.57	7.57	100	7.57	100	7.57	100	5	0	9.87		0	0	0	0	0	0	0	0	0	0	0	0		0	100	100	100		0	0	0	0
DE	DE12	DE124	Rastatt	0	9	0	7.57	7.57	82.1154	7.57	92.9808	7.57	79.6154	5	0	9.87		0	0	0	0	0	0	0	0	0	0	0	0		0	82.1154	92.9808	79.6154		0	0	0	0
DE	DE12	DE125	Heidelberg, Stadtkreis	0	9	0	7.57	7.57	100	7.57	100	7.57	100	5	0	9.87		0	0	0	0	0	0	0	0	0	0	0	0		0	100	100	100		0	0	0	0
DE	DE12	DE126	Mannheim, Stadtkreis	0	9	0	7.57	7.57	0	7.57	0	7.57	0	5	0	9.87		0	0	0	0	0	0	0	0	0	0	0	0		0	0	0	0		0	0	0	0
DE	DE12	DE127	Neckar-Odenwald-Kreis	0	9	0	7.57	7.57	100	7.57	100	7.57	100	5	0	9.87		0	0	0	0	0	0	0	0	0	0	0	0		0	100	100	100		0	0	0	0
DE	DE12	DE128	Rhein-Neckar-Kreis	0	9	0	7.57	7.57	100	7.57	100	7.57	100	5	0	9.87		0	0	0	0	0	0	0	0	0	0	0	0		0	100	100	100		0	0	0	0
DE	DE12	DE129	Pforzheim, Stadtkreis	0	9	0	7.57	7.57	100	7.57	100	7.57	100	5	0	9.87		0	0	0	0	0	0	0	0	0	0	0	0		0	100	100	100		0	0	0	0
DE	DE12	DE12A	Calw	0	9	0	7.57	7.57	100	7.57	100	7.57	100	5	0	9.87		0	0	0	0	0	0	0	0	0	0	0	0		0	100	100	100		0	0	0	0
DE	DE12	DE12B	Enzkreis	0	9	0	7.57	7.57	100	7.57	100	7.57	100	5	0	9.87		0	0	0	0	0	0	0	0	0	0	0	0		0	100	100	100		0	0	0	0
DE	DE12	DE12C	Freudenstadt	0	9	0	7.57	7.57	100	7.57	100	7.57	100	5	0	9.87		0	0	0	0	0	0	0	0	0	0	0	0		0	100	100	100		0	0	0	0
DE	DE13	DE131	Freiburg im Breisgau, Stadtkreis	0	9	0	7.57	7.57	16.2791	7.57	70.6977	7.57	16.2791	5	0	9.87		0	0	0	0	0	0	0	0	0	0	0	0		0	16.2791	70.6977	16.2791		0	0	0	0
DE	DE13	DE132	Breisgau-Hochschwarzwald	0	9	0	7.57	7.57	7.55581	7.57	43.3314	7.57	59.1872	5	0	9.87		0	0	0	0	0	0	0	0	0	0	0	0		0	7.55581	43.3314	59.1872		0	0	0	0
DE	DE13	DE133	Emmendingen	0	9	0	7.57	7.57	7.69231	7.57	41.5174	7.57	54.8999	5	0	9.87		0	0	0	0	0	0	0	0	0	0	0	0		0	7.69231	41.5174	54.8999		0	0	0	0
DE	DE13	DE134	Ortenaukreis	0	9	0	7.57	7.57	18.5027	7.57	24.224	7.57	17.1029	5	0	9.87		0	0	0	0	0	0	0	0	0	0	0	0		0	18.5027	24.224	17.1029		0	0	0	0
DE	DE13	DE135	Rottweil	0	9	0	7.57	7.57	0	7.57	0	7.57	0	5	0	9.87		0	0	0	0	0	0	0	0	0	0	0	0		0	0	0	0		0	0	0	0
DE	DE13	DE136	Schwarzwald-Baar-Kreis	0	9	0	7.57	7.57	0	7.57	0	7.57	0	5	0	9.87		0	0	0	0	0	0	0	0	0	0	0	0		0	0	0	0		0	0	0	0
DE	DE13	DE137	Tuttlingen	0	9	0	7.57	7.57	0	7.57	0	7.57	0	5	0	9.87		0	0	0	0	0	0	0	0	0	0	0	0		0	0	0	0		0	0	0	0
DE	DE13	DE138	Konstanz	0	9	0	7.57	7.57	22.695	7.57	100	7.57	100	5	0	9.87		0	0	0	0	0	0	0	0	0	0	0	0		0	22.695	100	100		0	0	0	0
DE	DE13	DE139	Lorrach	0	9	0	7.57	7.57	35.2564	7.57	100	7.57	100	5	0	9.87		0	0	0	0	0	0	0	0	0	0	0	0		0	35.2564	100	100		0	0	0	0
DE	DE13	DE13A	Waldshut	0	9	0	7.57	7.57	100	7.57	100	7.57	100	5	0	9.87		0	0	0	0	0	0	0	0	0	0	0	0		0	100	100	100		0	0	0	0
DE	DE14	DE141	Reutlingen	0	9	0	7.57	7.57	23.8176	7.57	100	7.57	100	5	0	9.87		0	0	0	0	0	0	0	0	0	0	0	0		0	23.8176	100	100		0	0	0	0
DE	DE14	DE142	Tubingen, Landkreis	0	9	0	7.57	7.57	39.6846	7.57	100	7.57	100	5	0	9.87		0	0	0	0	0	0	0	0	0	0	0	0		0	39.6846	100	100		0	0	0	0
DE	DE14	DE143	Zollernalbkreis	0	9	0	7.57	7.57	100	7.57	100	7.57	100	5	0	9.87		0	0	0	0	0	0	0	0	0	0	0	0		0	100	100	100		0	0	0	0
DE	DE14	DE144	Ulm, Stadtkreis	0	9	0	7.57	7.57	0	7.57	0	7.57	0	5	0	9.87		0	0	0	0	0	0	0	0	0	0	0	0		0	0	0	0		0	0	0	0
DE	DE14	DE145	Alb-Donau-Kreis	0	9	0	7.57	7.57	0	7.57	0	7.57	0	5	0	9.87		0	0	0	0	0	0	0	0	0	0	0	0		0	0	0	0		0	0	0	0
DE	DE14	DE146	Biberach	0	9	0	7.57	7.57	100	7.57	100	7.57	100	5	0	9.87		0	0	0	0	0	0	0	0	0	0	0	0		0	100	100	100		0	0	0	0
DE	DE14	DE147	Bodenseekreis	0	9	0	7.57	7.57	12.3631	7.57	61.5023	7.57	89.7496	5	0	9.87		0	0	0	0	0	0	0	0	0	0	0	0		0	12.3631	61.5023	89.7496		0	0	0	0
DE	DE14	DE148	Ravensburg	0	9	0	7.57	7.57	94.6667	7.57	100	7.57	100	5	0	9.87		0	0	0	0	0	0	0	0	0	0	0	0		0	94.6667	100	100		0	0	0	0
DE	DE14	DE149	Sigmaringen	0	9	0	7.57	7.37101	100	7.37101	100	7.37101	100	5	0	9.87		0	0	0	0	0	0	0	0	0	0	0	0		0	100	100	100		0	0	0	0
DE	DE21	DE211	Ingolstadt, Kreisfreie Stadt	0	9	0	7.37101	7.37101	0	7.37101	0	7.37101	0	5	16.4619	17.5066		0	0	0	0	0	0	0	0	0	0	0	0		0	0	0	0		0	0	0	0
DE	DE21	DE212	Munchen, Kreisfreie Stadt	0	9	0	7.37101	7.37101	0	7.37101	0	7.37101	0	5	16.4619	17.5066		0	0	0	0	0	0	0	0	0	0	0	0		0	0	0	0		0	0	0	0
DE	DE21	DE213	Rosenheim, Kreisfreie Stadt	0	9	0	7.37101	7.37101	0	7.37101	0	7.37101	0	5	16.4619	17.5066		0	0	0	0	0	0	0	0	0	0	0	0		0	0	0	0		0	0	0	0
DE	DE21	DE214	Altotting	0	9	0	7.37101	7.37101	0	7.37101	0	7.37101	0	5	16.4619	17.5066		0	0	0	0	0	0	0	0	0	0	0	0		0	0	0	0		0	0	0	0
DE	DE21	DE215	Berchtesgadener Land	0	9	0	7.37101	7.37101	100	7.37101	100	7.37101	100	5	16.4619	17.5066		0	0	0	0	0	0	0	0	0	0	0	0		0	100	100	100		0	0	0	0
DE	DE21	DE216	Bad Tolz-Wolfratshausen	0	9	0	7.37101	7.37101	0	7.37101	0	7.37101	0	5	16.4619	17.5066		0	0	0	0	0	0	0	0	0	0	0	0		0	0	0	0		0	0	0	0
DE	DE21	DE217	Dachau	0	9	0	7.37101	7.37101	0	7.37101	0	7.37101	0	5	16.4619	17.5066		0	0	0	0	0	0	0	0	0	0	0	0		0	0	0	0		0	0	0	0
DE	DE21	DE218	Ebersberg	0	9	0	7.37101	7.37101	0	7.37101	0	7.37101	0	5	16.4619	17.5066		0	0	0	0	0	0	0	0	0	0	0	0		0	0	0	0		0	0	0	0
DE	DE21	DE219	Eichstatt	0	9	0	7.37101	7.37101	100	7.37101	100	7.37101	100	5	16.4619	17.5066		0	0	0	0	0	0	0	0	0	0	0	0		0	100	100	100		0	0	0	0
DE	DE21	DE21A	Erding	0	9	0	7.37101	7.37101	0	7.37101	0	7.37101	0	5	16.4619	17.5066		0	0	0	0	0	0	0	0	0	0	0	0		0	0	0	0		0	0	0	0
DE	DE21	DE21B	Freising	0	9	0	7.37101	7.37101	100	7.37101	100	7.37101	100	5	16.4619	17.5066		0	0	0	0	0	0	0	0	0	0	0	0		0	100	100	100		0	0	0	0
DE	DE21	DE21C	Furstenfeldbruck	0	9	0	7.37101	7.37101	0	7.37101	0	7.37101	0	5	16.4619	17.5066		0	0	0	0	0	0	0	0	0	0	0	0		0	0	0	0		0	0	0	0
DE	DE21	DE21D	Garmisch-Partenkirchen	0	9	0	7.37101	7.37101	0	7.37101	0	7.37101	0	5	16.4619	17.5066		0	0	0	0	0	0	0	0	0	0	0	0		0	0	0	0		0	0	0	0
DE	DE21	DE21E	Landsberg am Lech	0	9	0	7.37101	7.37101	0	7.37101	0	7.37101	0	5	16.4619	17.5066		0	0	0	0	0	0	0	0	0	0	0	0		0	0	0	0		0	0	0	0
DE	DE21	DE21F	Miesbach	0	9	0	7.37101	7.37101	0	7.37101	0	7.37101	0	5	16.4619	17.5066		0	0	0	0	0	0	0	0	0	0	0	0		0	0	0	0		0	0	0	0
DE	DE21	DE21G	Muhldorf a. Inn	0	9	0	7.37101	7.37101	0	7.37101	0	7.37101	0	5	16.4619	17.5066		0	0	0	0	0	0	0	0	0	0	0	0		0	0	0	0		0	0	0	0
DE	DE21	DE21H	Munchen, Landkreis	0	9	0	7.37101	7.37101	0	7.37101	0	7.37101	0	5	16.4619	17.5066		0	0	0	0	0	0	0	0	0	0	0	0		0	0	0	0		0	0	0	0
DE	DE21	DE21I	Neuburg-Schrobenhausen	0	9	0	7.37101	7.37101	0	7.37101	0	7.37101	0	5	16.4619	17.5066		0	0	0	0	0	0	0	0	0	0	0	0		0	0	0	0		0	0	0	0
DE	DE21	DE21J	Pfaffenhofen a. d. Ilm	0	9	0	7.37101	7.37101	100	7.37101	100	7.37101	100	5	16.4619	17.5066		0	0	0	0	0	0	0	0	0	0	0	0		0	100	100	100		0	0	0	0
DE	DE21	DE21K	Rosenheim, Landkreis	0	9	0	7.37101	7.37101	0	7.37101	0	7.37101	0	5	16.4619	17.5066		0	0	0	0	0	0	0	0	0	0	0	0		0	0	0	0		0	0	0	0
DE	DE21	DE21L	Starnberg	0	9	0	7.37101	7.37101	0	7.37101	0	7.37101	0	5	16.4619	17.5066		0	0	0	0	0	0	0	0	0	0	0	0		0	0	0	0		0	0	0	0
DE	DE21	DE21M	Traunstein	0	9	0	7.37101	7.37101	0	7.37101	0	7.37101	0	5	16.4619	17.5066		0	0	0	0	0	0	0	0	0	0	0	0		0	0	0	0		0	0	0	0
DE	DE21	DE21N	Weilheim-Schongau	0	9	0	7.37101	7.37	0	7.37	0	7.37	0	5	16.4619	17.5066		0	0	0	0	0	0	0	0	0	0	0	0		0	0	0	0		0	0	0	0
DE	DE22	DE221	Landshut, Kreisfreie Stadt	0	9	0	7.37	7.37	0	7.37	0	7.37	0	5	0	17.51		0	0	0	0	0	0	0	0	0	0	0	0		0	0	0	0		0	0	0	0
DE	DE22	DE222	Passau, Kreisfreie Stadt	0	9	0	7.37	7.37	0	7.37	0	7.37	0	5	0	17.51		0	0	0	0	0	0	0	0	0	0	0	0		0	0	0	0		0	0	0	0
DE	DE22	DE223	Straubing, Kreisfreie Stadt	0	9	0	7.37	7.37	0	7.37	0	7.37	0	5	0	17.51		0	0	0	0	0	0	0	0	0	0	0	0		0	0	0	0		0	0	0	0
DE	DE22	DE224	Deggendorf	0	9	0	7.37	7.37	0	7.37	0	7.37	0	5	0	17.51		0	0	0	0	0	0	0	0	0	0	0	0		0	0	0	0		0	0	0	0
DE	DE22	DE225	Freyung-Grafenau	0	9	0	7.37	7.37	0	7.37	0	7.37	0	5	0	17.51		0	0	0	0	0	0	0	0	0	0	0	0		0	0	0	0		0	0	0	0
DE	DE22	DE226	Kelheim	0	9	0	7.37	7.37	100	7.37	100	7.37	100	5	0	17.51		0	0	0	0	0	0	0	0	0	0	0	0		0	100	100	100		0	0	0	0
DE	DE22	DE227	Landshut, Landkreis	0	9	0	7.37	7.37	100	7.37	100	7.37	100	5	0	17.51		0	0	0	0	0	0	0	0	0	0	0	0		0	100	100	100		0	0	0	0
DE	DE22	DE228	Passau, Landkreis	0	9	0	7.37	7.37	0	7.37	0	7.37	0	5	0	17.51		0	0	0	0	0	0	0	0	0	0	0	0		0	0	0	0		0	0	0	0
DE	DE22	DE229	Regen	0	9	0	7.37	7.37	0	7.37	0	7.37	0	5	0	17.51		0	0	0	0	0	0	0	0	0	0	0	0		0	0	0	0		0	0	0	0
DE	DE22	DE22A	Rottal-Inn	0	9	0	7.37	7.37	0	7.37	0	7.37	0	5	0	17.51		0	0	0	0	0	0	0	0	0	0	0	0		0	0	0	0		0	0	0	0
DE	DE22	DE22B	Straubing-Bogen	0	9	0	7.37	7.37	0	7.37	0	7.37	0	5	0	17.51		0	0	0	0	0	0	0	0	0	0	0	0		0	0	0	0		0	0	0	0
DE	DE22	DE22C	Dingolfing-Landau	0	9	0	7.37	7.37	0	7.37	0	7.37	0	5	0	17.51		0	0	0	0	0	0	0	0	0	0	0	0		0	0	0	0		0	0	0	0
DE	DE23	DE231	Amberg, Kreisfreie Stadt	0	9	0	7.37	7.37	0	7.37	0	7.37	0	5	0	17.51		0	0	0	0	0	0	0	0	0	0	0	0		0	0	0	0		0	0	0	0
DE	DE23	DE232	Regensburg, Kreisfreie Stadt	0	9	0	7.37	7.37	0	7.37	0	7.37	0	5	0	17.51		0	0	0	0	0	0	0	0	0	0	0	0		0	0	0	0		0	0	0	0
DE	DE23	DE233	Weiden i. d. Opf, Kreisfreie Stadt	0	9	0	7.37	7.37	0	7.37	0	7.37	0	5	0	17.51		0	0	0	0	0	0	0	0	0	0	0	0		0	0	0	0		0	0	0	0
DE	DE23	DE234	Amberg-Sulzbach	0	9	0	7.37	7.37	0	7.37	0	7.37	0	5	0	17.51		0	0	0	0	0	0	0	0	0	0	0	0		0	0	0	0		0	0	0	0
DE	DE23	DE235	Cham	0	9	0	7.37	7.37	0	7.37	0	7.37	0	5	0	17.51		0	0	0	0	0	0	0	0	0	0	0	0		0	0	0	0		0	0	0	0
DE	DE23	DE236	Neumarkt i. d. Opf.	0	9	0	7.37	7.37	100	7.37	100	7.37	100	5	0	17.51		0	0	0	0	0	0	0	0	0	0	0	0		0	100	100	100		0	0	0	0
DE	DE23	DE237	Neustadt a. d. Waldnaab	0	9	0	7.37	7.37	0	7.37	0	7.37	0	5	0	17.51		0	0	0	0	0	0	0	0	0	0	0	0		0	0	0	0		0	0	0	0
DE	DE23	DE238	Regensburg, Landkreis	0	9	0	7.37	7.37	0	7.37	0	7.37	0	5	0	17.51		0	0	0	0	0	0	0	0	0	0	0	0		0	0	0	0		0	0	0	0
DE	DE23	DE239	Schwandorf	0	9	0	7.37	7.37	0	7.37	0	7.37	0	5	0	17.51		0	0	0	0	0	0	0	0	0	0	0	0		0	0	0	0		0	0	0	0
DE	DE23	DE23A	Tirschenreuth	0	9	0	7.37	7.37	0	7.37	0	7.37	0	5	0	17.51		0	0	0	0	0	0	0	0	0	0	0	0		0	0	0	0		0	0	0	0
DE	DE24	DE241	Bamberg, Kreisfreie Stadt	0	9	0	7.37	7.37	0	7.37	0	7.37	0	5	0	17.51		0	0	0	0	0	0	0	0	0	0	0	0		0	0	0	0		0	0	0	0
DE	DE24	DE242	Bayreuth, Kreisfreie Stadt	0	9	0	7.37	7.37	0	7.37	0	7.37	0	5	0	17.51		0	0	0	0	0	0	0	0	0	0	0	0		0	0	0	0		0	0	0	0
DE	DE24	DE243	Coburg, Kreisfreie Stadt	0	9	0	7.37	7.37	0	7.37	0	7.37	0	5	0	17.51		0	0	0	0	0	0	0	0	0	0	0	0		0	0	0	0		0	0	0	0
DE	DE24	DE244	Hof, Kreisfreie Stadt	0	9	0	7.37	7.37	0	7.37	0	7.37	0	5	0	17.51		0	0	0	0	0	0	0	0	0	0	0	0		0	0	0	0		0	0	0	0
DE	DE24	DE245	Bamberg, Landkreis	0	9	0	7.37	7.37	0	7.37	0	7.37	0	5	0	17.51		0	0	0	0	0	0	0	0	0	0	0	0		0	0	0	0		0	0	0	0
DE	DE24	DE246	Bayreuth, Landkreis	0	9	0	7.37	7.37	0	7.37	0	7.37	0	5	0	17.51		0	0	0	0	0	0	0	0	0	0	0	0		0	0	0	0		0	0	0	0
DE	DE24	DE247	Coburg, Landkreis	0	9	0	7.37	7.37	0	7.37	0	7.37	0	5	0	17.51		0	0	0	0	0	0	0	0	0	0	0	0		0	0	0	0		0	0	0	0
DE	DE24	DE248	Forchheim	0	9	0	7.37	7.37	14.876	7.37	100	7.37	100	5	0	17.51		0	0	0	0	0	0	0	0	0	0	0	0		0	14.876	100	100		0	0	0	0
DE	DE24	DE249	Hof, Landkreis	0	9	0	7.37	7.37	0	7.37	0	7.37	0	5	0	17.51		0	0	0	0	0	0	0	0	0	0	0	0		0	0	0	0		0	0	0	0
DE	DE24	DE24A	Kronach	0	9	0	7.37	7.37	0	7.37	0	7.37	0	5	0	17.51		0	0	0	0	0	0	0	0	0	0	0	0		0	0	0	0		0	0	0	0
DE	DE24	DE24B	Kulmbach	0	9	0	7.37	7.37	0	7.37	0	7.37	0	5	0	17.51		0	0	0	0	0	0	0	0	0	0	0	0		0	0	0	0		0	0	0	0
DE	DE24	DE24C	Lichtenfels	0	9	0	7.37	7.37	0	7.37	0	7.37	0	5	0	17.51		0	0	0	0	0	0	0	0	0	0	0	0		0	0	0	0		0	0	0	0
DE	DE24	DE24D	Wunsiedel i. Fichtelgebirge	0	9	0	7.37	7.37	0	7.37	0	7.37	0	5	0	17.51		0	0	0	0	0	0	0	0	0	0	0	0		0	0	0	0		0	0	0	0
DE	DE25	DE251	Ansbach, Kreisfreie Stadt	0	9	0	7.37	7.37	0	7.37	0	7.37	0	5	0	17.51		0	0	0	0	0	0	0	0	0	0	0	0		0	0	0	0		0	0	0	0
DE	DE25	DE252	Erlangen, Kreisfreie Stadt	0	9	0	7.37	7.37	0	7.37	0	7.37	0	5	0	17.51		0	0	0	0	0	0	0	0	0	0	0	0		0	0	0	0		0	0	0	0
DE	DE25	DE253	Furth, Kreisfreie Stadt	0	9	0	7.37	7.37	0	7.37	0	7.37	0	5	0	17.51		0	0	0	0	0	0	0	0	0	0	0	0		0	0	0	0		0	0	0	0
DE	DE25	DE254	Nurnberg, Kreisfreie Stadt	0	9	0	7.37	7.37	0	7.37	0	7.37	0	5	0	17.51		0	0	0	0	0	0	0	0	0	0	0	0		0	0	0	0		0	0	0	0
DE	DE25	DE255	Schwabach, Kreisfreie Stadt	0	9	0	7.37	7.37	0	7.37	0	7.37	0	5	0	17.51		0	0	0	0	0	0	0	0	0	0	0	0		0	0	0	0		0	0	0	0
DE	DE25	DE256	Ansbach, Landkreis	0	9	0	7.37	7.37	0	7.37	0	7.37	0	5	0	17.51		0	0	0	0	0	0	0	0	0	0	0	0		0	0	0	0		0	0	0	0
DE	DE25	DE257	Erlangen-Hochstadt	0	9	0	7.37	7.37	0	7.37	0	7.37	0	5	0	17.51		0	0	0	0	0	0	0	0	0	0	0	0		0	0	0	0		0	0	0	0
DE	DE25	DE258	Furth, Landkreis	0	9	0	7.37	7.37	0	7.37	0	7.37	0	5	0	17.51		0	0	0	0	0	0	0	0	0	0	0	0		0	0	0	0		0	0	0	0
DE	DE25	DE259	Nurnberger Land	0	9	0	7.37	7.37	0	7.37	0	7.37	0	5	0	17.51		0	0	0	0	0	0	0	0	0	0	0	0		0	0	0	0		0	0	0	0
DE	DE25	DE25A	Neustadt a. d. Aisch-Bad Windsheim	0	9	0	7.37	7.37	100	7.37	100	7.37	100	5	0	17.51		0	0	0	0	0	0	0	0	0	0	0	0		0	100	100	100		0	0	0	0
DE	DE25	DE25B	Roth	0	9	0	7.37	7.37	0	7.37	0	7.37	0	5	0	17.51		0	0	0	0	0	0	0	0	0	0	0	0		0	0	0	0		0	0	0	0
DE	DE25	DE25C	Weissenburg-Gunzenhausen	0	9	0	7.37	7.37	0	7.37	0	7.37	0	5	0	17.51		0	0	0	0	0	0	0	0	0	0	0	0		0	0	0	0		0	0	0	0
DE	DE26	DE261	Aschaffenburg, Kreisfreie Stadt	0	9	0	7.37	7.37	100	7.37	100	7.37	100	5	0	17.51		0	0	0	0	0	0	0	0	0	0	0	0		0	100	100	100		0	0	0	0
DE	DE26	DE262	Schweinfurt, Kreisfreie Stadt	0	9	0	7.37	7.37	0	7.37	0	7.37	0	5	0	17.51		0	0	0	0	0	0	0	0	0	0	0	0		0	0	0	0		0	0	0	0
DE	DE26	DE263	Wurzburg, Kreisfreie Stadt	0	9	0	7.37	7.37	91.5663	7.37	100	7.37	100	5	0	17.51		0	0	0	0	0	0	0	0	0	0	0	0		0	91.5663	100	100		0	0	0	0
DE	DE26	DE264	Aschaffenburg, Landkreis	0	9	0	7.37	7.37	100	7.37	100	7.37	100	5	0	17.51		0	0	0	0	0	0	0	0	0	0	0	0		0	100	100	100		0	0	0	0
DE	DE26	DE265	Bad Kissingen	0	9	0	7.37	7.37	100	7.37	100	7.37	100	5	0	17.51		0	0	0	0	0	0	0	0	0	0	0	0		0	100	100	100		0	0	0	0
DE	DE26	DE266	Rhon-Grabfeld	0	9	0	7.37	7.37	0	7.37	0	7.37	0	5	0	17.51		0	0	0	0	0	0	0	0	0	0	0	0		0	0	0	0		0	0	0	0
DE	DE26	DE267	Hassberge	0	9	0	7.37	7.37	0	7.37	0	7.37	0	5	0	17.51		0	0	0	0	0	0	0	0	0	0	0	0		0	0	0	0		0	0	0	0
DE	DE26	DE268	Kitzingen	0	9	0	7.37	7.37	45.5064	7.37	100	7.37	100	5	0	17.51		0	0	0	0	0	0	0	0	0	0	0	0		0	45.5064	100	100		0	0	0	0
DE	DE26	DE269	Miltenberg	0	9	0	7.37	7.37	100	7.37	100	7.37	100	5	0	17.51		0	0	0	0	0	0	0	0	0	0	0	0		0	100	100	100		0	0	0	0
DE	DE26	DE26A	Main-Spessart	0	9	0	7.37	7.37	83.9858	7.37	100	7.37	100	5	0	17.51		0	0	0	0	0	0	0	0	0	0	0	0		0	83.9858	100	100		0	0	0	0
DE	DE26	DE26B	Schweinfurt, Landkreis	0	9	0	7.37	7.37	76.2712	7.37	100	7.37	100	5	0	17.51		0	0	0	0	0	0	0	0	0	0	0	0		0	76.2712	100	100		0	0	0	0
DE	DE26	DE26C	Wurzburg, Landkreis	0	9	0	7.37	7.37	28.9557	7.37	100	7.37	100	5	0	17.51		0	0	0	0	0	0	0	0	0	0	0	0		0	28.9557	100	100		0	0	0	0
DE	DE27	DE271	Augsburg, Kreisfreie Stadt	0	9	0	7.37	7.37	0	7.37	0	7.37	0	5	0	17.51		0	0	0	0	0	0	0	0	0	0	0	0		0	0	0	0		0	0	0	0
DE	DE27	DE272	Kaufbeuren, Kreisfreie Stadt	0	9	0	7.37	7.37	0	7.37	0	7.37	0	5	0	17.51		0	0	0	0	0	0	0	0	0	0	0	0		0	0	0	0		0	0	0	0
DE	DE27	DE273	Kempten (Allgau), Kreisfreie Stadt	0	9	0	7.37	7.37	0	7.37	0	7.37	0	5	0	17.51		0	0	0	0	0	0	0	0	0	0	0	0		0	0	0	0		0	0	0	0
DE	DE27	DE274	Memmingen, Kreisfreie Stadt	0	9	0	7.37	7.37	0	7.37	0	7.37	0	5	0	17.51		0	0	0	0	0	0	0	0	0	0	0	0		0	0	0	0		0	0	0	0
DE	DE27	DE275	Aichach-Friedberg	0	9	0	7.37	7.37	0	7.37	0	7.37	0	5	0	17.51		0	0	0	0	0	0	0	0	0	0	0	0		0	0	0	0		0	0	0	0
DE	DE27	DE276	Augsburg, Landkreis	0	9	0	7.37	7.37	0	7.37	0	7.37	0	5	0	17.51		0	0	0	0	0	0	0	0	0	0	0	0		0	0	0	0		0	0	0	0
DE	DE27	DE277	Dillingen a.d. Donau	0	9	0	7.37	7.37	0	7.37	0	7.37	0	5	0	17.51		0	0	0	0	0	0	0	0	0	0	0	0		0	0	0	0		0	0	0	0
DE	DE27	DE278	Gunzburg	0	9	0	7.37	7.37	0	7.37	0	7.37	0	5	0	17.51		0	0	0	0	0	0	0	0	0	0	0	0		0	0	0	0		0	0	0	0
DE	DE27	DE279	Neu-Ulm	0	9	0	7.37	7.37	0	7.37	0	7.37	0	5	0	17.51		0	0	0	0	0	0	0	0	0	0	0	0		0	0	0	0		0	0	0	0
DE	DE27	DE27A	Lindau (Bodensee)	0	9	0	7.37	7.37	0	7.37	36.5297	7.37	100	5	0	17.51		0	0	0	0	0	0	0	0	0	0	0	0		0	0	36.5297	100		0	0	0	0
DE	DE27	DE27B	Ostallgau	0	9	0	7.37	7.37	0	7.37	0	7.37	0	5	0	17.51		0	0	0	0	0	0	0	0	0	0	0	0		0	0	0	0		0	0	0	0
DE	DE27	DE27C	Unterallgau	0	9	0	7.37	7.37	0	7.37	0	7.37	0	5	0	17.51		0	0	0	0	0	0	0	0	0	0	0	0		0	0	0	0		0	0	0	0
DE	DE27	DE27D	Donau-Ries	0	9	0	7.37	7.37	0	7.37	0	7.37	0	5	0	17.51		0	0	0	0	0	0	0	0	0	0	0	0		0	0	0	0		0	0	0	0
DE	DE27	DE27E	Oberallgau	0	9	0	7.37	0	0	0	0	0	0	5	0	17.51		0	0	0	0	0	0	0	0	0	0	0	0		0	100	100	100		0	0	0	0
DE	DE30	DE300	Berlin	0	9	0	0	0.37594	0	0.37594	0	0.37594	0	5	0	0		0	0	0	0	0	0	0	0	0	0	0	0		0	0	0	0		0	0	0	0
DE	DE40	DE401	Brandenburg an der Havel, Kreisfreie Stadt	0	9	0	0.37594	0.37594	0	0.37594	0	0.37594	0	5	24.0602	24.1509		0	0	0	0	0	0	0	0	0	0	0	0		0	0	0	0		0	0	0	0
DE	DE40	DE402	Cottbus, Kreisfreie Stadt	0	9	0	0.37594	0.37594	0	0.37594	0	0.37594	0	5	24.0602	24.1509		0	0	0	0	0	0	0	0	0	0	0	0		0	0	0	0		0	0	0	0
DE	DE40	DE403	Frankfurt (Oder), Kreisfreie Stadt	0	9	0	0.37594	0.37594	0	0.37594	100	0.37594	100	5	24.0602	24.1509		0	0	0	0	0	0	0	0	0	0	0	0		0	0	100	100		0	0	0	0
DE	DE40	DE404	Potsdam, Kreisfreie Stadt	0	9	0	0.37594	0.37594	100	0.37594	100	0.37594	100	5	24.0602	24.1509		0	0	0	0	0	0	0	0	0	0	0	0		0	100	100	100		0	0	0	0
DE	DE40	DE405	Barnim	0	9	0	0.37594	0.37594	61.5385	0.37594	100	0.37594	100	5	24.0602	24.1509		0	0	0	0	0	0	0	0	0	0	0	0		0	61.5385	100	100		0	0	0	0
DE	DE40	DE406	Dahme-Spreewald	0	9	0	0.37594	0.37594	0	0.37594	0	0.37594	0	5	24.0602	24.1509		0	0	0	0	0	0	0	0	0	0	0	0		0	0	0	0		0	0	0	0
DE	DE40	DE407	Elbe-Elster	0	9	0	0.37594	0.37594	100	0.37594	100	0.37594	100	5	24.0602	24.1509		0	0	0	0	0	0	0	0	0	0	0	0		0	100	100	100		0	0	0	0
DE	DE40	DE408	Havelland	0	9	0	0.37594	0.37594	100	0.37594	100	0.37594	100	5	24.0602	24.1509		0	0	0	0	0	0	0	0	0	0	0	0		0	100	100	100		0	0	0	0
DE	DE40	DE409	Markisch-Oderland	0	9	0	0.37594	0.37594	10.3896	0.37594	100	0.37594	100	5	24.0602	24.1509		0	0	0	0	0	0	0	0	0	0	0	0		0	10.3896	100	100		0	0	0	0
DE	DE40	DE40A	Oberhavel	0	9	0	0.37594	0.37594	0	0.37594	0	0.37594	0	5	24.0602	24.1509		0	0	0	0	0	0	0	0	0	0	0	0		0	0	0	0		0	0	0	0
DE	DE40	DE40B	Oberspreewald-Lausitz	0	9	0	0.37594	0.37594	0	0.37594	0	0.37594	0	5	24.0602	24.1509		0	0	0	0	0	0	0	0	0	0	0	0		0	0	0	0		0	0	0	0
DE	DE40	DE40C	Oder-Spree	0	9	0	0.37594	0.37594	93.3333	0.37594	100	0.37594	100	5	24.0602	24.1509		0	0	0	0	0	0	0	0	0	0	0	0		0	93.3333	100	100		0	0	0	0
DE	DE40	DE40D	Ostprignitz-Ruppin	0	9	0	0.37594	0.37594	0	0.37594	0	0.37594	0	5	24.0602	24.1509		0	0	0	0	0	0	0	0	0	0	0	0		0	0	0	0		0	0	0	0
DE	DE40	DE40E	Potsdam-Mittelmark	0	9	0	0.37594	0.37594	18.7633	0.37594	71.855	0.37594	100	5	24.0602	24.1509		0	0	0	0	0	0	0	0	0	0	0	0		0	18.7633	71.855	100		0	0	0	0
DE	DE40	DE40F	Prignitz	0	9	0	0.37594	0.37594	0	0.37594	0	0.37594	0	5	24.0602	24.1509		0	0	0	0	0	0	0	0	0	0	0	0		0	0	0	0		0	0	0	0
DE	DE40	DE40G	Spree-Neisse	0	9	0	0.37594	0.37594	100	0.37594	100	0.37594	100	5	24.0602	24.1509		0	0	0	0	0	0	0	0	0	0	0	0		0	100	100	100		0	0	0	0
DE	DE40	DE40H	Teltow-Flaming	0	9	0	0.37594	0.37594	100	0.37594	100	0.37594	100	5	24.0602	24.1509		0	0	0	0	0	0	0	0	0	0	0	0		0	100	100	100		0	0	0	0
DE	DE40	DE40I	Uckermark	0	9	0	0.37594	0	100	0	100	0	100	5	24.0602	24.1509		0	0	0	0	0	0	0	0	0	0	0	0		0	100	100	100		0	0	0	0
DE	DE50	DE501	Bremen, Kreisfreie Stadt	0	9	0	0	0	0	0	0	0	0	5	0	0		0	0	0	0	0	0	0	0	0	0	0	0		0	100	100	100		0	0	0	0
DE	DE50	DE502	Bremerhaven, Kreisfreie Stadt	0	9	0	0	1.34228	0	1.34228	0	1.34228	0	5	0	0		0	0	0	0	0	0	0	0	0	0	0	0		0	0	0	0		0	0	0	0
DE	DE60	DE600	Hamburg	0	9	0	1.34228	5.34351	0	5.34351	17.0029	5.34351	3.45821	5	11.4094	11.5646		0	0	0	0	0	0	0	0	0	0	0	0		0	0	17.0029	3.45821		0	0	0	0
DE	DE71	DE711	Darmstadt, Kreisfreie Stadt	0	9	0	5.34351	5.34351	100	5.34351	100	5.34351	100	5	32.0611	33.871		0	0	0	0	0	0	0	0	0	0	0	0		0	100	100	100		0	0	0	0
DE	DE71	DE712	Frankfurt am Main, Kreisfreie Stadt	0	9	0	5.34351	5.34351	100	5.34351	100	5.34351	100	5	32.0611	33.871		0	0	0	0	0	0	0	0	0	0	0	0		0	100	100	100		0	0	0	0
DE	DE71	DE713	Offenbach am Main, Kreisfreie Stadt	0	9	0	5.34351	5.34351	100	5.34351	100	5.34351	100	5	32.0611	33.871		0	0	0	0	0	0	0	0	0	0	0	0		0	100	100	100		0	0	0	0
DE	DE71	DE714	Wiesbaden, Kreisfreie Stadt	0	9	0	5.34351	5.34351	91.9283	5.34351	69.9552	5.34351	63.6771	5	32.0611	33.871		0	0	0	0	0	0	0	0	0	0	0	0		0	91.9283	69.9552	63.6771		0	0	0	0
DE	DE71	DE715	Bergstrasse	0	9	0	5.34351	5.34351	100	5.34351	100	5.34351	100	5	32.0611	33.871		0	0	0	0	0	0	0	0	0	0	0	0		0	100	100	100		0	0	0	0
DE	DE71	DE716	Darmstadt-Dieburg	0	9	0	5.34351	5.34351	100	5.34351	100	5.34351	100	5	32.0611	33.871		0	0	0	0	0	0	0	0	0	0	0	0		0	100	100	100		0	0	0	0
DE	DE71	DE717	Gross-Gerau	0	9	0	5.34351	5.34351	100	5.34351	100	5.34351	100	5	32.0611	33.871		0	0	0	0	0	0	0	0	0	0	0	0		0	100	100	100		0	0	0	0
DE	DE71	DE718	Hochtaunuskreis	0	9	0	5.34351	5.34351	100	5.34351	100	5.34351	100	5	32.0611	33.871		0	0	0	0	0	0	0	0	0	0	0	0		0	100	100	100		0	0	0	0
DE	DE71	DE719	Main-Kinzig-Kreis	0	9	0	5.34351	5.34351	100	5.34351	100	5.34351	100	5	32.0611	33.871		0	0	0	0	0	0	0	0	0	0	0	0		0	100	100	100		0	0	0	0
DE	DE71	DE71A	Main-Taunus-Kreis	0	9	0	5.34351	5.34351	100	5.34351	100	5.34351	100	5	32.0611	33.871		0	0	0	0	0	0	0	0	0	0	0	0		0	100	100	100		0	0	0	0
DE	DE71	DE71B	Odenwaldkreis	0	9	0	5.34351	5.34351	0	5.34351	0	5.34351	0	5	32.0611	33.871		0	0	0	0	0	0	0	0	0	0	0	0		0	0	0	0		0	0	0	0
DE	DE71	DE71C	Offenbach, Landkreis	0	9	0	5.34351	5.34351	100	5.34351	100	5.34351	100	5	32.0611	33.871		0	0	0	0	0	0	0	0	0	0	0	0		0	100	100	100		0	0	0	0
DE	DE71	DE71D	Rheingau-Taunus-Kreis	0	9	0	5.34351	5.34351	8.51064	5.34351	10.9574	5.34351	6.48936	5	32.0611	33.871		0	0	0	0	0	0	0	0	0	0	0	0		0	8.51064	10.9574	6.48936		0	0	0	0
DE	DE71	DE71E	Wetteraukreis	0	9	0	5.34351	5.34	100	5.34	100	5.34	100	5	32.0611	33.871		0	0	0	0	0	0	0	0	0	0	0	0		0	100	100	100		0	0	0	0
DE	DE72	DE721	Giessen, Landkreis	0	9	0	5.34	5.34	100	5.34	100	5.34	100	5	0	33.87		0	0	0	0	0	0	0	0	0	0	0	0		0	100	100	100		0	0	0	0
DE	DE72	DE722	Lahn-Dill-Kreis	0	9	0	5.34	5.34	0	5.34	0	5.34	0	5	0	33.87		0	0	0	0	0	0	0	0	0	0	0	0		0	0	0	0		0	0	0	0
DE	DE72	DE723	Limburg-Weilburg	0	9	0	5.34	5.34	0	5.34	0	5.34	0	5	0	33.87		0	0	0	0	0	0	0	0	0	0	0	0		0	0	0	0		0	0	0	0
DE	DE72	DE724	Marburg-Biedenkopf	0	9	0	5.34	5.34	0	5.34	0	5.34	0	5	0	33.87		0	0	0	0	0	0	0	0	0	0	0	0		0	0	0	0		0	0	0	0
DE	DE72	DE725	Vogelsbergkreis	0	9	0	5.34	5.34	0	5.34	0	5.34	0	5	0	33.87		0	0	0	0	0	0	0	0	0	0	0	0		0	0	0	0		0	0	0	0
DE	DE73	DE731	Kassel, Kreisfreie Stadt	0	9	0	5.34	5.34	0	5.34	0	5.34	0	5	0	33.87		0	0	0	0	0	0	0	0	0	0	0	0		0	0	0	0		0	0	0	0
DE	DE73	DE732	Fulda	0	9	0	5.34	5.34	0	5.34	0	5.34	0	5	0	33.87		0	0	0	0	0	0	0	0	0	0	0	0		0	0	0	0		0	0	0	0
DE	DE73	DE733	Hersfeld-Rotenburg	0	9	0	5.34	5.34	0	5.34	0	5.34	0	5	0	33.87		0	0	0	0	0	0	0	0	0	0	0	0		0	0	0	0		0	0	0	0
DE	DE73	DE734	Kassel, Landkreis	0	9	0	5.34	5.34	100	5.34	100	5.34	100	5	0	33.87		0	0	0	0	0	0	0	0	0	0	0	0		0	100	100	100		0	0	0	0
DE	DE73	DE735	Schwalm-Eder-Kreis	0	9	0	5.34	5.34	0	5.34	0	5.34	0	5	0	33.87		0	0	0	0	0	0	0	0	0	0	0	0		0	0	0	0		0	0	0	0
DE	DE73	DE736	Waldeck-Frankenberg	0	9	0	5.34	5.34	100	5.34	100	5.34	100	5	0	33.87		0	0	0	0	0	0	0	0	0	0	0	0		0	100	100	100		0	0	0	0
DE	DE73	DE737	Werra-Meissner-Kreis	0	9	0	5.34	0	100	0	100	0	100	5	0	33.87		0	0	0	0	0	0	0	0	0	0	0	0		0	100	100	100		0	0	0	0
DE	DE80	DE803	Rostock, Kreisfreie Stadt	0	9	0	0	0	100	0	100	0	100	5	39.6648	39.6648		0	0	0	0	0	0	0	0	0	0	0	0		0	100	100	100		0	0	0	0
DE	DE80	DE804	Schwerin, Kreisfreie Stadt	0	9	0	0	0	0	0	0	0	0	5	39.6648	39.6648		0	0	0	0	0	0	0	0	0	0	0	0		0	100	100	100		0	0	0	0
DE	DE80	DE80J	Mecklenburgische Seenplatte	0	9	0	0	0	100	0	100	0	100	5	39.6648	39.6648		0	0	0	0	0	0	0	0	0	0	0	0		0	100	100	100		0	0	0	0
DE	DE80	DE80K	Landkreis Rostock	0	9	0	0	0	100	0	100	0	100	5	39.6648	39.6648		0	0	0	0	0	0	0	0	0	0	0	0		0	100	100	100		0	0	0	0
DE	DE80	DE80L	Vorpommern-Rugen	0	9	0	0	0	100	0	100	0	100	5	39.6648	39.6648		0	0	0	0	0	0	0	0	0	0	0	0		0	100	100	100		0	0	0	0
DE	DE80	DE80M	Nordwestmecklenburg	0	9	0	0	0	0	0	0	0	0	5	39.6648	39.6648		0	0	0	0	0	0	0	0	0	0	0	0		0	100	100	100		0	0	0	0
DE	DE80	DE80N	Vorpommern-Greifswald	0	9	0	0	0	100	0	100	0	100	5	39.6648	39.6648		0	0	0	0	0	0	0	0	0	0	0	0		0	100	100	100		0	0	0	0
DE	DE80	DE80O	Ludwigslust-Parchim	0	9	0	0	0.929752	52.1739	0.929752	100	0.929752	100	5	39.6648	39.6648		0	0	0	0	0	0	0	0	0	0	0	0		0	52.1739	100	100		0	0	0	0
DE	DE91	DE911	Braunschweig, Kreisfreie Stadt	0	9	0	0.929752	0.929752	0	0.929752	0	0.929752	0	5	13.0165	13.0344		0	0	0	0	0	0	0	0	0	0	0	0		0	0	0	0		0	0	0	0
DE	DE91	DE912	Salzgitter, Kreisfreie Stadt	0	9	0	0.929752	0.929752	0	0.929752	0	0.929752	0	5	13.0165	13.0344		0	0	0	0	0	0	0	0	0	0	0	0		0	0	0	0		0	0	0	0
DE	DE91	DE913	Wolfsburg, Kreisfreie Stadt	0	9	0	0.929752	0.929752	0	0.929752	0	0.929752	0	5	13.0165	13.0344		0	0	0	0	0	0	0	0	0	0	0	0		0	0	0	0		0	0	0	0
DE	DE91	DE914	Gifhorn	0	9	0	0.929752	0.929752	0	0.929752	0	0.929752	0	5	13.0165	13.0344		0	0	0	0	0	0	0	0	0	0	0	0		0	0	0	0		0	0	0	0
DE	DE91	DE915	Gottingen	0	9	0	0.929752	0.929752	0	0.929752	0	0.929752	0	5	13.0165	13.0344		0	0	0	0	0	0	0	0	0	0	0	0		0	0	0	0		0	0	0	0
DE	DE91	DE916	Goslar	0	9	0	0.929752	0.929752	0	0.929752	0	0.929752	0	5	13.0165	13.0344		0	0	0	0	0	0	0	0	0	0	0	0		0	0	0	0		0	0	0	0
DE	DE91	DE917	Helmstedt	0	9	0	0.929752	0.929752	0	0.929752	0	0.929752	0	5	13.0165	13.0344		0	0	0	0	0	0	0	0	0	0	0	0		0	0	0	0		0	0	0	0
DE	DE91	DE918	Northeim	0	9	0	0.929752	0.929752	0	0.929752	0	0.929752	0	5	13.0165	13.0344		0	0	0	0	0	0	0	0	0	0	0	0		0	0	0	0		0	0	0	0
DE	DE91	DE919	Osterode am Harz	0	9	0	0.929752	0.929752	0	0.929752	0	0.929752	0	5	13.0165	13.0344		0	0	0	0	0	0	0	0	0	0	0	0		0	0	0	0		0	0	0	0
DE	DE91	DE91A	Peine	0	9	0	0.929752	0.929752	0	0.929752	0	0.929752	0	5	13.0165	13.0344		0	0	0	0	0	0	0	0	0	0	0	0		0	0	0	0		0	0	0	0
DE	DE91	DE91B	Wolfenbuttel	0	9	0	0.929752	0.93	0	0.93	0	0.93	0	5	13.0165	13.0344		0	0	0	0	0	0	0	0	0	0	0	0		0	0	0	0		0	0	0	0
DE	DE92	DE922	Diepholz	0	9	0	0.93	0.93	0	0.93	0	0.93	0	5	0	13.03		0	0	0	0	0	0	0	0	0	0	0	0		0	0	0	0		0	0	0	0
DE	DE92	DE923	Hameln-Pyrmont	0	9	0	0.93	0.93	0	0.93	0	0.93	0	5	0	13.03		0	0	0	0	0	0	0	0	0	0	0	0		0	0	0	0		0	0	0	0
DE	DE92	DE925	Hildesheim	0	9	0	0.93	0.93	0	0.93	0	0.93	0	5	0	13.03		0	0	0	0	0	0	0	0	0	0	0	0		0	0	0	0		0	0	0	0
DE	DE92	DE926	Holzminden	0	9	0	0.93	0.93	0	0.93	0	0.93	0	5	0	13.03		0	0	0	0	0	0	0	0	0	0	0	0		0	0	0	0		0	0	0	0
DE	DE92	DE927	Nienburg (Weser)	0	9	0	0.93	0.93	0	0.93	0	0.93	0	5	0	13.03		0	0	0	0	0	0	0	0	0	0	0	0		0	0	0	0		0	0	0	0
DE	DE92	DE928	Schaumburg	0	9	0	0.93	0.93	0	0.93	0	0.93	0	5	0	13.03		0	0	0	0	0	0	0	0	0	0	0	0		0	0	0	0		0	0	0	0
DE	DE92	DE929	Region Hannover	0	9	0	0.93	0.93	0	0.93	0	0.93	0	5	0	13.03		0	0	0	0	0	0	0	0	0	0	0	0		0	0	0	0		0	0	0	0
DE	DE93	DE931	Celle	0	9	0	0.93	0.93	0	0.93	0	0.93	0	5	0	13.03		0	0	0	0	0	0	0	0	0	0	0	0		0	0	0	0		0	0	0	0
DE	DE93	DE932	Cuxhaven	0	9	0	0.93	0.93	100	0.93	100	0.93	100	5	0	13.03		0	0	0	0	0	0	0	0	0	0	0	0		0	100	100	100		0	0	0	0
DE	DE93	DE933	Harburg	0	9	0	0.93	0.93	47.7778	0.93	69.4444	0.93	69.4444	5	0	13.03		0	0	0	0	0	0	0	0	0	0	0	0		0	47.7778	69.4444	69.4444		0	0	0	0
DE	DE93	DE934	Luchow-Dannenberg	0	9	0	0.93	0.93	0	0.93	0	0.93	0	5	0	13.03		0	0	0	0	0	0	0	0	0	0	0	0		0	0	0	0		0	0	0	0
DE	DE93	DE935	Luneburg, Landkreis	0	9	0	0.93	0.93	100	0.93	100	0.93	100	5	0	13.03		0	0	0	0	0	0	0	0	0	0	0	0		0	100	100	100		0	0	0	0
DE	DE93	DE936	Osterholz	0	9	0	0.93	0.93	0	0.93	0	0.93	0	5	0	13.03		0	0	0	0	0	0	0	0	0	0	0	0		0	0	0	0		0	0	0	0
DE	DE93	DE937	Rotenburg (Wumme)	0	9	0	0.93	0.93	0	0.93	0	0.93	0	5	0	13.03		0	0	0	0	0	0	0	0	0	0	0	0		0	0	0	0		0	0	0	0
DE	DE93	DE938	Heidekreis	0	9	0	0.93	0.93	0	0.93	0	0.93	0	5	0	13.03		0	0	0	0	0	0	0	0	0	0	0	0		0	0	0	0		0	0	0	0
DE	DE93	DE939	Stade	0	9	0	0.93	0.93	2.36931	0.93	3.83603	0.93	2.18127	5	0	13.03		0	0	0	0	0	0	0	0	0	0	0	0		0	2.36931	3.83603	2.18127		0	0	0	0
DE	DE93	DE93A	Uelzen	0	9	0	0.93	0.93	0	0.93	0	0.93	0	5	0	13.03		0	0	0	0	0	0	0	0	0	0	0	0		0	0	0	0		0	0	0	0
DE	DE93	DE93B	Verden	0	9	0	0.93	0.93	0	0.93	0	0.93	0	5	0	13.03		0	0	0	0	0	0	0	0	0	0	0	0		0	0	0	0		0	0	0	0
DE	DE94	DE941	Delmenhorst, Kreisfreie Stadt	0	9	0	0.93	0.93	0	0.93	0	0.93	0	5	0	13.03		0	0	0	0	0	0	0	0	0	0	0	0		0	0	0	0		0	0	0	0
DE	DE94	DE942	Emden, Kreisfreie Stadt	0	9	0	0.93	0.93	0	0.93	0	0.93	0	5	0	13.03		0	0	0	0	0	0	0	0	0	0	0	0		0	0	0	0		0	0	0	0
DE	DE94	DE943	Oldenburg (Oldenburg), Kreisfreie Stadt	0	9	0	0.93	0.93	0	0.93	0	0.93	0	5	0	13.03		0	0	0	0	0	0	0	0	0	0	0	0		0	0	0	0		0	0	0	0
DE	DE94	DE944	Osnabruck, Kreisfreie Stadt	0	9	0	0.93	0.93	0	0.93	0	0.93	0	5	0	13.03		0	0	0	0	0	0	0	0	0	0	0	0		0	0	0	0		0	0	0	0
DE	DE94	DE945	Wilhelmshaven, Kreisfreie Stadt	0	9	0	0.93	0.93	0	0.93	0	0.93	0	5	0	13.03		0	0	0	0	0	0	0	0	0	0	0	0		0	0	0	0		0	0	0	0
DE	DE94	DE946	Ammerland	0	9	0	0.93	0.93	0	0.93	0	0.93	0	5	0	13.03		0	0	0	0	0	0	0	0	0	0	0	0		0	0	0	0		0	0	0	0
DE	DE94	DE947	Aurich	0	9	0	0.93	0.93	0	0.93	0	0.93	0	5	0	13.03		0	0	0	0	0	0	0	0	0	0	0	0		0	0	0	0		0	0	0	0
DE	DE94	DE948	Cloppenburg	0	9	0	0.93	0.93	0	0.93	0	0.93	0	5	0	13.03		0	0	0	0	0	0	0	0	0	0	0	0		0	0	0	0		0	0	0	0
DE	DE94	DE949	Emsland	0	9	0	0.93	0.93	0	0.93	0	0.93	0	5	0	13.03		0	0	0	0	0	0	0	0	0	0	0	0		0	0	0	0		0	0	0	0
DE	DE94	DE94A	Friesland (DE)	0	9	0	0.93	0.93	0	0.93	0	0.93	0	5	0	13.03		0	0	0	0	0	0	0	0	0	0	0	0		0	0	0	0		0	0	0	0
DE	DE94	DE94B	Grafschaft Bentheim	0	9	0	0.93	0.93	0	0.93	0	0.93	0	5	0	13.03		0	0	0	0	0	0	0	0	0	0	0	0		0	0	0	0		0	0	0	0
DE	DE94	DE94C	Leer	0	9	0	0.93	0.93	0	0.93	0	0.93	0	5	0	13.03		0	0	0	0	0	0	0	0	0	0	0	0		0	0	0	0		0	0	0	0
DE	DE94	DE94D	Oldenburg, Landkreis	0	9	0	0.93	0.93	0	0.93	0	0.93	0	5	0	13.03		0	0	0	0	0	0	0	0	0	0	0	0		0	0	0	0		0	0	0	0
DE	DE94	DE94E	Osnabruck, Landkreis	0	9	0	0.93	0.93	0	0.93	0	0.93	0	5	0	13.03		0	0	0	0	0	0	0	0	0	0	0	0		0	0	0	0		0	0	0	0
DE	DE94	DE94F	Vechta	0	9	0	0.93	0.93	0	0.93	0	0.93	0	5	0	13.03		0	0	0	0	0	0	0	0	0	0	0	0		0	0	0	0		0	0	0	0
DE	DE94	DE94G	Wesermarsch	0	9	0	0.93	0.93	0	0.93	0	0.93	0	5	0	13.03		0	0	0	0	0	0	0	0	0	0	0	0		0	0	0	0		0	0	0	0
DE	DE94	DE94H	Wittmund	0	9	0	0.93	0.621118	0	0.621118	0	0.621118	0	5	0	13.03		0	0	0	0	0	0	0	0	0	0	0	0		0	0	0	0		0	0	0	0
DE	DEA1	DEA11	Dusseldorf, Kreisfreie Stadt	0	9	0	0.621118	0.621118	0	0.621118	0	0.621118	0	5	9.62733	9.6875		0	0	0	0	0	0	0	0	0	0	0	0		0	0	0	0		0	0	0	0
DE	DEA1	DEA12	Duisburg, Kreisfreie Stadt	0	9	0	0.621118	0.621118	0	0.621118	0	0.621118	0	5	9.62733	9.6875		0	0	0	0	0	0	0	0	0	0	0	0		0	0	0	0		0	0	0	0
DE	DEA1	DEA13	Essen, Kreisfreie Stadt	0	9	0	0.621118	0.621118	0	0.621118	0	0.621118	0	5	9.62733	9.6875		0	0	0	0	0	0	0	0	0	0	0	0		0	0	0	0		0	0	0	0
DE	DEA1	DEA14	Krefeld, Kreisfreie Stadt	0	9	0	0.621118	0.621118	0	0.621118	0	0.621118	0	5	9.62733	9.6875		0	0	0	0	0	0	0	0	0	0	0	0		0	0	0	0		0	0	0	0
DE	DEA1	DEA15	Monchengladbach, Kreisfreie Stadt	0	9	0	0.621118	0.621118	0	0.621118	0	0.621118	0	5	9.62733	9.6875		0	0	0	0	0	0	0	0	0	0	0	0		0	0	0	0		0	0	0	0
DE	DEA1	DEA16	Mulheim an der Ruhr,Kreisfreie Stadt	0	9	0	0.621118	0.621118	0	0.621118	0	0.621118	0	5	9.62733	9.6875		0	0	0	0	0	0	0	0	0	0	0	0		0	0	0	0		0	0	0	0
DE	DEA1	DEA17	Oberhausen, Kreisfreie Stadt	0	9	0	0.621118	0.621118	0	0.621118	0	0.621118	0	5	9.62733	9.6875		0	0	0	0	0	0	0	0	0	0	0	0		0	0	0	0		0	0	0	0
DE	DEA1	DEA18	Remscheid, Kreisfreie Stadt	0	9	0	0.621118	0.621118	0	0.621118	0	0.621118	0	5	9.62733	9.6875		0	0	0	0	0	0	0	0	0	0	0	0		0	0	0	0		0	0	0	0
DE	DEA1	DEA19	Solingen, Kreisfreie Stadt	0	9	0	0.621118	0.621118	0	0.621118	0	0.621118	0	5	9.62733	9.6875		0	0	0	0	0	0	0	0	0	0	0	0		0	0	0	0		0	0	0	0
DE	DEA1	DEA1A	Wuppertal, Kreisfreie Stadt	0	9	0	0.621118	0.621118	0	0.621118	0	0.621118	0	5	9.62733	9.6875		0	0	0	0	0	0	0	0	0	0	0	0		0	0	0	0		0	0	0	0
DE	DEA1	DEA1B	Kleve	0	9	0	0.621118	0.621118	100	0.621118	100	0.621118	100	5	9.62733	9.6875		0	0	0	0	0	0	0	0	0	0	0	0		0	100	100	100		0	0	0	0
DE	DEA1	DEA1C	Mettmann	0	9	0	0.621118	0.621118	0	0.621118	0	0.621118	0	5	9.62733	9.6875		0	0	0	0	0	0	0	0	0	0	0	0		0	0	0	0		0	0	0	0
DE	DEA1	DEA1D	Rhein-Kreis Neuss	0	9	0	0.621118	0.621118	0	0.621118	0	0.621118	0	5	9.62733	9.6875		0	0	0	0	0	0	0	0	0	0	0	0		0	0	0	0		0	0	0	0
DE	DEA1	DEA1E	Viersen	0	9	0	0.621118	0.621118	0	0.621118	0	0.621118	0	5	9.62733	9.6875		0	0	0	0	0	0	0	0	0	0	0	0		0	0	0	0		0	0	0	0
DE	DEA1	DEA1F	Wesel	0	9	0	0.621118	0.62	100	0.62	100	0.62	100	5	9.62733	9.6875		0	0	0	0	0	0	0	0	0	0	0	0		0	100	100	100		0	0	0	0
DE	DEA2	DEA22	Bonn, Kreisfreie Stadt	0	9	0	0.62	0.62	95.8333	0.62	95.8333	0.62	100	5	0	9.69		0	0	0	0	0	0	0	0	0	0	0	0		0	95.8333	95.8333	100		0	0	0	0
DE	DEA2	DEA23	Koln, Kreisfreie Stadt	0	9	0	0.62	0.62	0	0.62	0	0.62	0	5	0	9.69		0	0	0	0	0	0	0	0	0	0	0	0		0	0	0	0		0	0	0	0
DE	DEA2	DEA24	Leverkusen, Kreisfreie Stadt	0	9	0	0.62	0.62	0	0.62	0	0.62	0	5	0	9.69		0	0	0	0	0	0	0	0	0	0	0	0		0	0	0	0		0	0	0	0
DE	DEA2	DEA26	Duren	0	9	0	0.62	0.62	0	0.62	0	0.62	0	5	0	9.69		0	0	0	0	0	0	0	0	0	0	0	0		0	0	0	0		0	0	0	0
DE	DEA2	DEA27	Rhein-Erft-Kreis	0	9	0	0.62	0.62	0	0.62	0	0.62	0	5	0	9.69		0	0	0	0	0	0	0	0	0	0	0	0		0	0	0	0		0	0	0	0
DE	DEA2	DEA28	Euskirchen	0	9	0	0.62	0.62	0	0.62	0	0.62	0	5	0	9.69		0	0	0	0	0	0	0	0	0	0	0	0		0	0	0	0		0	0	0	0
DE	DEA2	DEA29	Heinsberg	0	9	0	0.62	0.62	100	0.62	100	0.62	100	5	0	9.69		0	0	0	0	0	0	0	0	0	0	0	0		0	100	100	100		0	0	0	0
DE	DEA2	DEA2A	Oberbergischer Kreis	0	9	0	0.62	0.62	0	0.62	0	0.62	0	5	0	9.69		0	0	0	0	0	0	0	0	0	0	0	0		0	0	0	0		0	0	0	0
DE	DEA2	DEA2B	Rheinisch-Bergischer Kreis	0	9	0	0.62	0.62	0	0.62	0	0.62	0	5	0	9.69		0	0	0	0	0	0	0	0	0	0	0	0		0	0	0	0		0	0	0	0
DE	DEA2	DEA2C	Rhein-Sieg-Kreis	0	9	0	0.62	0.62	3.7037	0.62	7.18954	0.62	100	5	0	9.69		0	0	0	0	0	0	0	0	0	0	0	0		0	3.7037	7.18954	100		0	0	0	0
DE	DEA2	DEA2D	Stadteregion Aachen	0	9	0	0.62	0.62	0	0.62	0	0.62	0	5	0	9.69		0	0	0	0	0	0	0	0	0	0	0	0		0	0	0	0		0	0	0	0
DE	DEA3	DEA31	Bottrop, Kreisfreie Stadt	0	9	0	0.62	0.62	0	0.62	0	0.62	0	5	0	9.69		0	0	0	0	0	0	0	0	0	0	0	0		0	0	0	0		0	0	0	0
DE	DEA3	DEA32	Gelsenkirchen, Kreisfreie Stadt	0	9	0	0.62	0.62	0	0.62	0	0.62	0	5	0	9.69		0	0	0	0	0	0	0	0	0	0	0	0		0	0	0	0		0	0	0	0
DE	DEA3	DEA33	Munster, Kreisfreie Stadt	0	9	0	0.62	0.62	0	0.62	0	0.62	0	5	0	9.69		0	0	0	0	0	0	0	0	0	0	0	0		0	0	0	0		0	0	0	0
DE	DEA3	DEA34	Borken	0	9	0	0.62	0.62	0	0.62	0	0.62	0	5	0	9.69		0	0	0	0	0	0	0	0	0	0	0	0		0	0	0	0		0	0	0	0
DE	DEA3	DEA35	Coesfeld	0	9	0	0.62	0.62	0	0.62	0	0.62	0	5	0	9.69		0	0	0	0	0	0	0	0	0	0	0	0		0	0	0	0		0	0	0	0
DE	DEA3	DEA36	Recklinghausen	0	9	0	0.62	0.62	0	0.62	0	0.62	0	5	0	9.69		0	0	0	0	0	0	0	0	0	0	0	0		0	0	0	0		0	0	0	0
DE	DEA3	DEA37	Steinfurt	0	9	0	0.62	0.62	0	0.62	0	0.62	0	5	0	9.69		0	0	0	0	0	0	0	0	0	0	0	0		0	0	0	0		0	0	0	0
DE	DEA3	DEA38	Warendorf	0	9	0	0.62	0.62	0	0.62	0	0.62	0	5	0	9.69		0	0	0	0	0	0	0	0	0	0	0	0		0	0	0	0		0	0	0	0
DE	DEA4	DEA41	Bielefeld, Kreisfreie Stadt	0	9	0	0.62	0.62	0	0.62	0	0.62	0	5	0	9.69		0	0	0	0	0	0	0	0	0	0	0	0		0	0	0	0		0	0	0	0
DE	DEA4	DEA42	Gutersloh	0	9	0	0.62	0.62	0	0.62	0	0.62	0	5	0	9.69		0	0	0	0	0	0	0	0	0	0	0	0		0	0	0	0		0	0	0	0
DE	DEA4	DEA43	Herford	0	9	0	0.62	0.62	0	0.62	0	0.62	0	5	0	9.69		0	0	0	0	0	0	0	0	0	0	0	0		0	0	0	0		0	0	0	0
DE	DEA4	DEA44	Hoxter	0	9	0	0.62	0.62	0	0.62	0	0.62	0	5	0	9.69		0	0	0	0	0	0	0	0	0	0	0	0		0	0	0	0		0	0	0	0
DE	DEA4	DEA45	Lippe	0	9	0	0.62	0.62	0	0.62	0	0.62	0	5	0	9.69		0	0	0	0	0	0	0	0	0	0	0	0		0	0	0	0		0	0	0	0
DE	DEA4	DEA46	Minden-Lubbecke	0	9	0	0.62	0.62	0	0.62	0	0.62	0	5	0	9.69		0	0	0	0	0	0	0	0	0	0	0	0		0	0	0	0		0	0	0	0
DE	DEA4	DEA47	Paderborn	0	9	0	0.62	0.62	0	0.62	0	0.62	0	5	0	9.69		0	0	0	0	0	0	0	0	0	0	0	0		0	0	0	0		0	0	0	0
DE	DEA5	DEA51	Bochum, Kreisfreie Stadt	0	9	0	0.62	0.62	0	0.62	0	0.62	0	5	0	9.69		0	0	0	0	0	0	0	0	0	0	0	0		0	0	0	0		0	0	0	0
DE	DEA5	DEA52	Dortmund, Kreisfreie Stadt	0	9	0	0.62	0.62	0	0.62	0	0.62	0	5	0	9.69		0	0	0	0	0	0	0	0	0	0	0	0		0	0	0	0		0	0	0	0
DE	DEA5	DEA53	Hagen, Kreisfreie Stadt	0	9	0	0.62	0.62	0	0.62	0	0.62	0	5	0	9.69		0	0	0	0	0	0	0	0	0	0	0	0		0	0	0	0		0	0	0	0
DE	DEA5	DEA54	Hamm, Kreisfreie Stadt	0	9	0	0.62	0.62	0	0.62	0	0.62	0	5	0	9.69		0	0	0	0	0	0	0	0	0	0	0	0		0	0	0	0		0	0	0	0
DE	DEA5	DEA55	Herne, Kreisfreie Stadt	0	9	0	0.62	0.62	0	0.62	0	0.62	0	5	0	9.69		0	0	0	0	0	0	0	0	0	0	0	0		0	0	0	0		0	0	0	0
DE	DEA5	DEA56	Ennepe-Ruhr-Kreis	0	9	0	0.62	0.62	0	0.62	0	0.62	0	5	0	9.69		0	0	0	0	0	0	0	0	0	0	0	0		0	0	0	0		0	0	0	0
DE	DEA5	DEA57	Hochsauerlandkreis	0	9	0	0.62	0.62	0	0.62	0	0.62	0	5	0	9.69		0	0	0	0	0	0	0	0	0	0	0	0		0	0	0	0		0	0	0	0
DE	DEA5	DEA58	Markischer Kreis	0	9	0	0.62	0.62	0	0.62	0	0.62	0	5	0	9.69		0	0	0	0	0	0	0	0	0	0	0	0		0	0	0	0		0	0	0	0
DE	DEA5	DEA59	Olpe	0	9	0	0.62	0.62	0	0.62	0	0.62	0	5	0	9.69		0	0	0	0	0	0	0	0	0	0	0	0		0	0	0	0		0	0	0	0
DE	DEA5	DEA5A	Siegen-Wittgenstein	0	9	0	0.62	0.62	0	0.62	0	0.62	0	5	0	9.69		0	0	0	0	0	0	0	0	0	0	0	0		0	0	0	0		0	0	0	0
DE	DEA5	DEA5B	Soest	0	9	0	0.62	0.62	0	0.62	0	0.62	0	5	0	9.69		0	0	0	0	0	0	0	0	0	0	0	0		0	0	0	0		0	0	0	0
DE	DEA5	DEA5C	Unna	0	9	0	0.62	3.41	0	3.41	0	3.41	0	5	0	9.69		0	0	0	0	0	0	0	0	0	0	0	0		0	0	0	0		0	0	0	0
DE	DEB1	DEB11	Koblenz, Kreisfreie Stadt	0	9	0	3.41	3.41	100	3.41	100	3.41	100	5	0	8.92		0	0	0	0	0	0	0	0	0	0	0	0		0	100	100	100		0	0	0	0
DE	DEB1	DEB12	Ahrweiler	0	9	0	3.41	3.41	47.7876	3.41	61.9469	3.41	100	5	0	8.92		0	0	0	0	0	0	0	0	0	0	0	0		0	47.7876	61.9469	100		0	0	0	0
DE	DEB1	DEB13	Altenkirchen (Westerwald)	0	9	0	3.41	3.41	0	3.41	0	3.41	0	5	0	8.92		0	0	0	0	0	0	0	0	0	0	0	0		0	0	0	0		0	0	0	0
DE	DEB1	DEB14	Bad Kreuznach	0	9	0	3.41	3.41	44.4444	3.41	55.5556	3.41	0	5	0	8.92		0	0	0	0	0	0	0	0	0	0	0	0		0	44.4444	55.5556	0		0	0	0	0
DE	DEB1	DEB15	Birkenfeld	0	9	0	3.41	3.41	0	3.41	0	3.41	0	5	0	8.92		0	0	0	0	0	0	0	0	0	0	0	0		0	0	0	0		0	0	0	0
DE	DEB1	DEB16	Cochem-Zell	0	9	0	3.41	3.41	100	3.41	100	3.41	100	5	0	8.92		0	0	0	0	0	0	0	0	0	0	0	0		0	100	100	100		0	0	0	0
DE	DEB1	DEB17	Mayen-Koblenz	0	9	0	3.41	3.41	100	3.41	100	3.41	100	5	0	8.92		0	0	0	0	0	0	0	0	0	0	0	0		0	100	100	100		0	0	0	0
DE	DEB1	DEB18	Neuwied	0	9	0	3.41	3.41	100	3.41	100	3.41	100	5	0	8.92		0	0	0	0	0	0	0	0	0	0	0	0		0	100	100	100		0	0	0	0
DE	DEB1	DEB19	Rhein-Hunsruck-Kreis	0	9	0	3.41	3.41	100	3.41	100	3.41	100	5	0	8.92		0	0	0	0	0	0	0	0	0	0	0	0		0	100	100	100		0	0	0	0
DE	DEB1	DEB1A	Rhein-Lahn-Kreis	0	9	0	3.41	3.41	100	3.41	100	3.41	100	5	0	8.92		0	0	0	0	0	0	0	0	0	0	0	0		0	100	100	100		0	0	0	0
DE	DEB1	DEB1B	Westerwaldkreis	0	9	0	3.41	3.41	0	3.41	0	3.41	0	5	0	8.92		0	0	0	0	0	0	0	0	0	0	0	0		0	0	0	0		0	0	0	0
DE	DEB2	DEB21	Trier, Kreisfreie Stadt	0	9	0	3.41	3.41	100	3.41	100	3.41	100	5	0	8.92		0	0	0	0	0	0	0	0	0	0	0	0		0	100	100	100		0	0	0	0
DE	DEB2	DEB22	Bernkastel-Wittlich	0	9	0	3.41	3.41	100	3.41	100	3.41	100	5	0	8.92		0	0	0	0	0	0	0	0	0	0	0	0		0	100	100	100		0	0	0	0
DE	DEB2	DEB23	Eifelkreis Bitburg-Prum	0	9	0	3.41	3.41	0	3.41	0	3.41	0	5	0	8.92		0	0	0	0	0	0	0	0	0	0	0	0		0	0	0	0		0	0	0	0
DE	DEB2	DEB24	Vulkaneifel	0	9	0	3.41	3.41	0	3.41	0	3.41	0	5	0	8.92		0	0	0	0	0	0	0	0	0	0	0	0		0	0	0	0		0	0	0	0
DE	DEB2	DEB25	Trier-Saarburg	0	9	0	3.41	3.40681	100	3.40681	100	3.40681	100	5	0	8.92		0	0	0	0	0	0	0	0	0	0	0	0		0	100	100	100		0	0	0	0
DE	DEB3	DEB31	Frankenthal (Pfalz), Kreisfreie Stadt	0	9	0	3.40681	3.40681	0	3.40681	0	3.40681	0	5	8.81764	8.92116		0	0	0	0	0	0	0	0	0	0	0	0		0	0	0	0		0	0	0	0
DE	DEB3	DEB32	Kaiserslautern, Kreisfreie Stadt	0	9	0	3.40681	3.40681	0	3.40681	0	3.40681	0	5	8.81764	8.92116		0	0	0	0	0	0	0	0	0	0	0	0		0	0	0	0		0	0	0	0
DE	DEB3	DEB33	Landau in der Pfalz, Kreisfreie Stadt	0	9	0	3.40681	3.40681	0.356506	3.40681	0	3.40681	0	5	8.81764	8.92116		0	0	0	0	0	0	0	0	0	0	0	0		0	0.356506	0	0		0	0	0	0
DE	DEB3	DEB34	Ludwigshafen am Rhein, Kreisfreie Stadt	0	9	0	3.40681	3.40681	0	3.40681	0	3.40681	0	5	8.81764	8.92116		0	0	0	0	0	0	0	0	0	0	0	0		0	0	0	0		0	0	0	0
DE	DEB3	DEB35	Mainz, Kreisfreie Stadt	0	9	0	3.40681	3.40681	5.41516	3.40681	18.7726	3.40681	0	5	8.81764	8.92116		0	0	0	0	0	0	0	0	0	0	0	0		0	5.41516	18.7726	0		0	0	0	0
DE	DEB3	DEB36	Neustadt an der Weinstrasse, Kreisfreie Stadt	0	9	0	3.40681	3.40681	1.64835	3.40681	0.3663	3.40681	0	5	8.81764	8.92116		0	0	0	0	0	0	0	0	0	0	0	0		0	1.64835	0.3663	0		0	0	0	0
DE	DEB3	DEB37	Pirmasens, Kreisfreie Stadt	0	9	0	3.40681	3.40681	0	3.40681	0	3.40681	0	5	8.81764	8.92116		0	0	0	0	0	0	0	0	0	0	0	0		0	0	0	0		0	0	0	0
DE	DEB3	DEB38	Speyer, Kreisfreie Stadt	0	9	0	3.40681	3.40681	100	3.40681	100	3.40681	100	5	8.81764	8.92116		0	0	0	0	0	0	0	0	0	0	0	0		0	100	100	100		0	0	0	0
DE	DEB3	DEB39	Worms, Kreisfreie Stadt	0	9	0	3.40681	3.40681	4.61538	3.40681	7.38462	3.40681	0	5	8.81764	8.92116		0	0	0	0	0	0	0	0	0	0	0	0		0	4.61538	7.38462	0		0	0	0	0
DE	DEB3	DEB3A	Zweibrucken, Kreisfreie Stadt	0	9	0	3.40681	3.40681	100	3.40681	100	3.40681	100	5	8.81764	8.92116		0	0	0	0	0	0	0	0	0	0	0	0		0	100	100	100		0	0	0	0
DE	DEB3	DEB3B	Alzey-Worms	0	9	0	3.40681	3.40681	1.93548	3.40681	4.88079	3.40681	0	5	8.81764	8.92116		0	0	0	0	0	0	0	0	0	0	0	0		0	1.93548	4.88079	0		0	0	0	0
DE	DEB3	DEB3C	Bad Durkheim	0	9	0	3.40681	3.40681	0	3.40681	0	3.40681	0	5	8.81764	8.92116		0	0	0	0	0	0	0	0	0	0	0	0		0	0	0	0		0	0	0	0
DE	DEB3	DEB3D	Donnersbergkreis	0	9	0	3.40681	3.40681	57.9832	3.40681	42.8571	3.40681	23.5294	5	8.81764	8.92116		0	0	0	0	0	0	0	0	0	0	0	0		0	57.9832	42.8571	23.5294		0	0	0	0
DE	DEB3	DEB3E	Germersheim	0	9	0	3.40681	3.40681	95.5882	3.40681	97.0588	3.40681	30.8824	5	8.81764	8.92116		0	0	0	0	0	0	0	0	0	0	0	0		0	95.5882	97.0588	30.8824		0	0	0	0
DE	DEB3	DEB3F	Kaiserslautern, Landkreis	0	9	0	3.40681	3.40681	0	3.40681	0	3.40681	0	5	8.81764	8.92116		0	0	0	0	0	0	0	0	0	0	0	0		0	0	0	0		0	0	0	0
DE	DEB3	DEB3G	Kusel	0	9	0	3.40681	3.40681	100	3.40681	100	3.40681	100	5	8.81764	8.92116		0	0	0	0	0	0	0	0	0	0	0	0		0	100	100	100		0	0	0	0
DE	DEB3	DEB3H	Sudliche Weinstrasse	0	9	0	3.40681	3.40681	1.02941	3.40681	5.22059	3.40681	2.27941	5	8.81764	8.92116		0	0	0	0	0	0	0	0	0	0	0	0		0	1.02941	5.22059	2.27941		0	0	0	0
DE	DEB3	DEB3I	Rhein-Pfalz-Kreis	0	9	0	3.40681	3.40681	33.3333	3.40681	24.2424	3.40681	0	5	8.81764	8.92116		0	0	0	0	0	0	0	0	0	0	0	0		0	33.3333	24.2424	0		0	0	0	0
DE	DEB3	DEB3J	Mainz-Bingen	0	9	0	3.40681	3.40681	3.8247	3.40681	4.834	3.40681	3.34661	5	8.81764	8.92116		0	0	0	0	0	0	0	0	0	0	0	0		0	3.8247	4.834	3.34661		0	0	0	0
DE	DEB3	DEB3K	Sudwestpfalz	0	9	0	3.40681	5.55556	100	5.55556	100	5.55556	100	5	8.81764	8.92116		0	0	0	0	0	0	0	0	0	0	0	0		0	100	100	100		0	0	0	0
DE	DEC0	DEC01	Regionalverband Saarbrucken	0	9	0	5.55556	5.55556	100	5.55556	100	5.55556	100	5	44.4444	47.0588		0	0	0	0	0	0	0	0	0	0	0	0		0	100	100	100		0	0	0	0
DE	DEC0	DEC02	Merzig-Wadern	0	9	0	5.55556	5.55556	100	5.55556	100	5.55556	100	5	44.4444	47.0588		0	0	0	0	0	0	0	0	0	0	0	0		0	100	100	100		0	0	0	0
DE	DEC0	DEC03	Neunkirchen	0	9	0	5.55556	5.55556	100	5.55556	100	5.55556	100	5	44.4444	47.0588		0	0	0	0	0	0	0	0	0	0	0	0		0	100	100	100		0	0	0	0
DE	DEC0	DEC04	Saarlouis	0	9	0	5.55556	5.55556	100	5.55556	100	5.55556	100	5	44.4444	47.0588		0	0	0	0	0	0	0	0	0	0	0	0		0	100	100	100		0	0	0	0
DE	DEC0	DEC05	Saarpfalz-Kreis	0	9	0	5.55556	5.55556	100	5.55556	100	5.55556	100	5	44.4444	47.0588		0	0	0	0	0	0	0	0	0	0	0	0		0	100	100	100		0	0	0	0
DE	DEC0	DEC06	St. Wendel	0	9	0	5.55556	0	100	0	100	0	100	5	44.4444	47.0588		0	0	0	0	0	0	0	0	0	0	0	0		0	100	100	100		0	0	0	0
DE	DED2	DED21	Dresden, Kreisfreie Stadt	0	9	0	0	0	0	0	0	0	100	5	12.2995	12.2995		0	0	0	0	0	0	0	0	0	0	0	0		0	100	100	100		0	0	0	0
DE	DED2	DED2C	Bautzen	0	9	0	0	0	0	0	0	0	0	5	12.2995	12.2995		0	0	0	0	0	0	0	0	0	0	0	0		0	100	100	100		0	0	0	0
DE	DED2	DED2D	Gorlitz	0	9	0	0	0	100	0	100	0	100	5	12.2995	12.2995		0	0	0	0	0	0	0	0	0	0	0	0		0	100	100	100		0	0	0	0
DE	DED2	DED2E	Meissen	0	9	0	0	0	100	0	100	0	100	5	12.2995	12.2995		0	0	0	0	0	0	0	0	0	0	0	0		0	100	100	100		0	0	0	0
DE	DED2	DED2F	Sachsische Schweiz-Osterzgebirge	0	9	0	0	0	11.9149	0	12.1277	0	100	5	12.2995	12.2995		0	0	0	0	0	0	0	0	0	0	0	0		0	100	100	100		0	0	0	0
DE	DED4	DED41	Chemnitz, Kreisfreie Stadt	0	9	0	0	0	0	0	0	0	0	5	0	12.3		0	0	0	0	0	0	0	0	0	0	0	0		0	100	100	100		0	0	0	0
DE	DED4	DED42	Erzgebirgskreis	0	9	0	0	0	0	0	0	0	0	5	0	12.3		0	0	0	0	0	0	0	0	0	0	0	0		0	100	100	100		0	0	0	0
DE	DED4	DED43	Mittelsachsen	0	9	0	0	0	70.4762	0	100	0	100	5	0	12.3		0	0	0	0	0	0	0	0	0	0	0	0		0	100	100	100		0	0	0	0
DE	DED4	DED44	Vogtlandkreis	0	9	0	0	0	0	0	0	0	0	5	0	12.3		0	0	0	0	0	0	0	0	0	0	0	0		0	100	100	100		0	0	0	0
DE	DED4	DED45	Zwickau	0	9	0	0	0	100	0	100	0	100	5	0	12.3		0	0	0	0	0	0	0	0	0	0	0	0		0	100	100	100		0	0	0	0
DE	DED5	DED51	Leipzig, Kreisfreie Stadt	0	9	0	0	0	100	0	100	0	100	5	0	12.3		0	0	0	0	0	0	0	0	0	0	0	0		0	100	100	100		0	0	0	0
DE	DED5	DED52	Leipzig	0	9	0	0	0	7.40741	0	100	0	100	5	0	12.3		0	0	0	0	0	0	0	0	0	0	0	0		0	100	100	100		0	0	0	0
DE	DED5	DED53	Nordsachsen	0	9	0	0	0.526316	31.2139	0.526316	100	0.526316	100	5	0	12.3		0	0	0	0	0	0	0	0	0	0	0	0		0	31.2139	100	100		0	0	0	0
DE	DEE0	DEE01	Dessau-Rosslau, Kreisfreie Stadt	0	9	0	0.526316	0.526316	100	0.526316	100	0.526316	100	5	26.8421	26.9841		0	0	0	0	0	0	0	0	0	0	0	0		0	100	100	100		0	0	0	0
DE	DEE0	DEE02	Halle (Saale), Kreisfreie Stadt	0	9	0	0.526316	0.526316	100	0.526316	100	0.526316	100	5	26.8421	26.9841		0	0	0	0	0	0	0	0	0	0	0	0		0	100	100	100		0	0	0	0
DE	DEE0	DEE03	Magdeburg, Kreisfreie Stadt	0	9	0	0.526316	0.526316	0	0.526316	0	0.526316	0	5	26.8421	26.9841		0	0	0	0	0	0	0	0	0	0	0	0		0	0	0	0		0	0	0	0
DE	DEE0	DEE04	Altmarkkreis Salzwedel	0	9	0	0.526316	0.526316	0	0.526316	0	0.526316	0	5	26.8421	26.9841		0	0	0	0	0	0	0	0	0	0	0	0		0	0	0	0		0	0	0	0
DE	DEE0	DEE05	Anhalt-Bitterfeld	0	9	0	0.526316	0.526316	100	0.526316	100	0.526316	100	5	26.8421	26.9841		0	0	0	0	0	0	0	0	0	0	0	0		0	100	100	100		0	0	0	0
DE	DEE0	DEE06	Jerichower Land	0	9	0	0.526316	0.526316	0	0.526316	0	0.526316	0	5	26.8421	26.9841		0	0	0	0	0	0	0	0	0	0	0	0		0	0	0	0		0	0	0	0
DE	DEE0	DEE07	Borde	0	9	0	0.526316	0.526316	100	0.526316	100	0.526316	100	5	26.8421	26.9841		0	0	0	0	0	0	0	0	0	0	0	0		0	100	100	100		0	0	0	0
DE	DEE0	DEE08	Burgenland (DE)	0	9	0	0.526316	0.526316	100	0.526316	100	0.526316	100	5	26.8421	26.9841		0	0	0	0	0	0	0	0	0	0	0	0		0	100	100	100		0	0	0	0
DE	DEE0	DEE09	Harz	0	9	0	0.526316	0.526316	100	0.526316	100	0.526316	100	5	26.8421	26.9841		0	0	0	0	0	0	0	0	0	0	0	0		0	100	100	100		0	0	0	0
DE	DEE0	DEE0A	Mansfeld-Sudharz	0	9	0	0.526316	0.526316	100	0.526316	100	0.526316	100	5	26.8421	26.9841		0	0	0	0	0	0	0	0	0	0	0	0		0	100	100	100		0	0	0	0
DE	DEE0	DEE0B	Saalekreis	0	9	0	0.526316	0.526316	100	0.526316	100	0.526316	100	5	26.8421	26.9841		0	0	0	0	0	0	0	0	0	0	0	0		0	100	100	100		0	0	0	0
DE	DEE0	DEE0C	Salzlandkreis	0	9	0	0.526316	0.526316	100	0.526316	100	0.526316	100	5	26.8421	26.9841		0	0	0	0	0	0	0	0	0	0	0	0		0	100	100	100		0	0	0	0
DE	DEE0	DEE0D	Stendal	0	9	0	0.526316	0.526316	100	0.526316	100	0.526316	100	5	26.8421	26.9841		0	0	0	0	0	0	0	0	0	0	0	0		0	100	100	100		0	0	0	0
DE	DEE0	DEE0E	Wittenberg	0	9	0	0.526316	2.43902	10.2041	2.43902	100	2.43902	100	5	26.8421	26.9841		0	0	0	0	0	0	0	0	0	0	0	0		0	10.2041	100	100		0	0	0	0
DE	DEF0	DEF01	Flensburg, Kreisfreie Stadt	0	9	0	2.43902	2.43902	0	2.43902	0	2.43902	0	5	13.4146	13.75		0	0	0	0	0	0	0	0	0	0	0	0		0	0	0	0		0	0	0	0
DE	DEF0	DEF02	Kiel, Kreisfreie Stadt	0	9	0	2.43902	2.43902	0	2.43902	0	2.43902	0	5	13.4146	13.75		0	0	0	0	0	0	0	0	0	0	0	0		0	0	0	0		0	0	0	0
DE	DEF0	DEF03	Lubeck, Kreisfreie Stadt	0	9	0	2.43902	2.43902	0	2.43902	0	2.43902	0	5	13.4146	13.75		0	0	0	0	0	0	0	0	0	0	0	0		0	0	0	0		0	0	0	0
DE	DEF0	DEF04	Neumunster, Kreisfreie Stadt	0	9	0	2.43902	2.43902	0	2.43902	0	2.43902	0	5	13.4146	13.75		0	0	0	0	0	0	0	0	0	0	0	0		0	0	0	0		0	0	0	0
DE	DEF0	DEF05	Dithmarschen	0	9	0	2.43902	2.43902	0	2.43902	0	2.43902	0	5	13.4146	13.75		0	0	0	0	0	0	0	0	0	0	0	0		0	0	0	0		0	0	0	0
DE	DEF0	DEF06	Herzogtum Lauenburg	0	9	0	2.43902	2.43902	0	2.43902	0	2.43902	0	5	13.4146	13.75		0	0	0	0	0	0	0	0	0	0	0	0		0	0	0	0		0	0	0	0
DE	DEF0	DEF07	Nordfriesland	0	9	0	2.43902	2.43902	0	2.43902	0	2.43902	0	5	13.4146	13.75		0	0	0	0	0	0	0	0	0	0	0	0		0	0	0	0		0	0	0	0
DE	DEF0	DEF08	Ostholstein	0	9	0	2.43902	2.43902	100	2.43902	100	2.43902	100	5	13.4146	13.75		0	0	0	0	0	0	0	0	0	0	0	0		0	100	100	100		0	0	0	0
DE	DEF0	DEF09	Pinneberg	0	9	0	2.43902	2.43902	0	2.43902	0	2.43902	0	5	13.4146	13.75		0	0	0	0	0	0	0	0	0	0	0	0		0	0	0	0		0	0	0	0
DE	DEF0	DEF0A	Plon	0	9	0	2.43902	2.43902	0	2.43902	0	2.43902	0	5	13.4146	13.75		0	0	0	0	0	0	0	0	0	0	0	0		0	0	0	0		0	0	0	0
DE	DEF0	DEF0B	Rendsburg-Eckernforde	0	9	0	2.43902	2.43902	0	2.43902	0	2.43902	0	5	13.4146	13.75		0	0	0	0	0	0	0	0	0	0	0	0		0	0	0	0		0	0	0	0
DE	DEF0	DEF0C	Schleswig-Flensburg	0	9	0	2.43902	2.43902	0	2.43902	0	2.43902	0	5	13.4146	13.75		0	0	0	0	0	0	0	0	0	0	0	0		0	0	0	0		0	0	0	0
DE	DEF0	DEF0D	Segeberg	0	9	0	2.43902	2.43902	0	2.43902	0	2.43902	0	5	13.4146	13.75		0	0	0	0	0	0	0	0	0	0	0	0		0	0	0	0		0	0	0	0
DE	DEF0	DEF0E	Steinburg	0	9	0	2.43902	2.43902	0	2.43902	0	2.43902	0	5	13.4146	13.75		0	0	0	0	0	0	0	0	0	0	0	0		0	0	0	0		0	0	0	0
DE	DEF0	DEF0F	Stormarn	0	9	0	2.43902	0.431034	0	0.431034	0	0.431034	0	5	13.4146	13.75		0	0	0	0	0	0	0	0	0	0	0	0		0	0	0	0		0	0	0	0
DE	DEG0	DEG01	Erfurt, Kreisfreie Stadt	0	9	0	0.431034	0.431034	100	0.431034	100	0.431034	100	5	10.3448	10.3896		0	0	0	0	0	0	0	0	0	0	0	0		0	100	100	100		0	0	0	0
DE	DEG0	DEG02	Gera, Kreisfreie Stadt	0	9	0	0.431034	0.431034	100	0.431034	100	0.431034	100	5	10.3448	10.3896		0	0	0	0	0	0	0	0	0	0	0	0		0	100	100	100		0	0	0	0
DE	DEG0	DEG03	Jena, Kreisfreie Stadt	0	9	0	0.431034	0.431034	0	0.431034	0	0.431034	0	5	10.3448	10.3896		0	0	0	0	0	0	0	0	0	0	0	0		0	0	0	0		0	0	0	0
DE	DEG0	DEG04	Suhl, Kreisfreie Stadt	0	9	0	0.431034	0.431034	0	0.431034	0	0.431034	0	5	10.3448	10.3896		0	0	0	0	0	0	0	0	0	0	0	0		0	0	0	0		0	0	0	0
DE	DEG0	DEG05	Weimar, Kreisfreie Stadt	0	9	0	0.431034	0.431034	0	0.431034	0	0.431034	0	5	10.3448	10.3896		0	0	0	0	0	0	0	0	0	0	0	0		0	0	0	0		0	0	0	0
DE	DEG0	DEG06	Eichsfeld	0	9	0	0.431034	0.431034	0	0.431034	0	0.431034	0	5	10.3448	10.3896		0	0	0	0	0	0	0	0	0	0	0	0		0	0	0	0		0	0	0	0
DE	DEG0	DEG07	Nordhausen	0	9	0	0.431034	0.431034	100	0.431034	100	0.431034	100	5	10.3448	10.3896		0	0	0	0	0	0	0	0	0	0	0	0		0	100	100	100		0	0	0	0
DE	DEG0	DEG09	Unstrut-Hainich-Kreis	0	9	0	0.431034	0.431034	100	0.431034	100	0.431034	100	5	10.3448	10.3896		0	0	0	0	0	0	0	0	0	0	0	0		0	100	100	100		0	0	0	0
DE	DEG0	DEG0A	Kyffhauserkreis	0	9	0	0.431034	0.431034	100	0.431034	100	0.431034	100	5	10.3448	10.3896		0	0	0	0	0	0	0	0	0	0	0	0		0	100	100	100		0	0	0	0
DE	DEG0	DEG0B	Schmalkalden-Meiningen	0	9	0	0.431034	0.431034	0	0.431034	0	0.431034	0	5	10.3448	10.3896		0	0	0	0	0	0	0	0	0	0	0	0		0	0	0	0		0	0	0	0
DE	DEG0	DEG0C	Gotha	0	9	0	0.431034	0.431034	25.4826	0.431034	100	0.431034	100	5	10.3448	10.3896		0	0	0	0	0	0	0	0	0	0	0	0		0	25.4826	100	100		0	0	0	0
DE	DEG0	DEG0D	Sommerda	0	9	0	0.431034	0.431034	24.2236	0.431034	100	0.431034	100	5	10.3448	10.3896		0	0	0	0	0	0	0	0	0	0	0	0		0	24.2236	100	100		0	0	0	0
DE	DEG0	DEG0E	Hildburghausen	0	9	0	0.431034	0.431034	100	0.431034	100	0.431034	100	5	10.3448	10.3896		0	0	0	0	0	0	0	0	0	0	0	0		0	100	100	100		0	0	0	0
DE	DEG0	DEG0F	Ilm-Kreis	0	9	0	0.431034	0.431034	0	0.431034	0	0.431034	0	5	10.3448	10.3896		0	0	0	0	0	0	0	0	0	0	0	0		0	0	0	0		0	0	0	0
DE	DEG0	DEG0G	Weimarer Land	0	9	0	0.431034	0.431034	100	0.431034	100	0.431034	100	5	10.3448	10.3896		0	0	0	0	0	0	0	0	0	0	0	0		0	100	100	100		0	0	0	0
DE	DEG0	DEG0H	Sonneberg	0	9	0	0.431034	0.431034	0	0.431034	0	0.431034	0	5	10.3448	10.3896		0	0	0	0	0	0	0	0	0	0	0	0		0	0	0	0		0	0	0	0
DE	DEG0	DEG0I	Saalfeld-Rudolstadt	0	9	0	0.431034	0.431034	0	0.431034	0	0.431034	0	5	10.3448	10.3896		0	0	0	0	0	0	0	0	0	0	0	0		0	0	0	0		0	0	0	0
DE	DEG0	DEG0J	Saale-Holzland-Kreis	0	9	0	0.431034	0.431034	100	0.431034	100	0.431034	100	5	10.3448	10.3896		0	0	0	0	0	0	0	0	0	0	0	0		0	100	100	100		0	0	0	0
DE	DEG0	DEG0K	Saale-Orla-Kreis	0	9	0	0.431034	0.431034	0	0.431034	0	0.431034	0	5	10.3448	10.3896		0	0	0	0	0	0	0	0	0	0	0	0		0	0	0	0		0	0	0	0
DE	DEG0	DEG0L	Greiz	0	9	0	0.431034	0.431034	0	0.431034	0	0.431034	0	5	10.3448	10.3896		0	0	0	0	0	0	0	0	0	0	0	0		0	0	0	0		0	0	0	0
DE	DEG0	DEG0M	Altenburger Land	0	9	0	0.431034	0.431034	0	0.431034	0	0.431034	0	5	10.3448	10.3896		0	0	0	0	0	0	0	0	0	0	0	0		0	0	0	0		0	0	0	0
DE	DEG0	DEG0N	Eisenach, Kreisfreie Stadt	0	9	0	0.431034	0.431034	0	0.431034	0	0.431034	0	5	10.3448	10.3896		0	0	0	0	0	0	0	0	0	0	0	0		0	0	0	0		0	0	0	0
DE	DEG0	DEG0P	Wartburgkreis	0	9	0	0.431034	52.381	0	52.381	0	52.381	0	5	10.3448	10.3896		0	0	0	0	0	0	0	0	0	0	0	0		0	0	0	0		0	0	0	0
DK	DK01	DK011	Byen Kobenhavn	0	9	0	0	0	0	0	0	0	0	1	50	50		0	0	0	0	0	0	0	0	0	0	0	0		0	100	100	100		0	0	0	0
DK	DK01	DK012	Kobenhavns Omegn	0	9	0	0	0	0	0	0	0	0	1	50	50		0	0	0	0	0	0	0	0	0	0	0	0		0	100	100	100		0	0	0	0
DK	DK01	DK013	Nordsjaelland	0	9	0	0	0	100	0	100	0	100	1	50	50		122.517	111.49	111.49	111.49	0	0	0	55.1877	55.1877	0	0	0		111.49	100	100	100		100	0	111.49	100
DK	DK01	DK014	Bornholm	0	9	0	0	1.44928	0	1.44928	0	1.44928	0	1	50	50		15.0007	13.6506	13.6506	13.6506	13.4528	13.4528	13.4528	6.75707	6.75707	6.65914	6.65914	6.65914		13.6506	0	0	0	BioE_COM-S & BioE_COM-M & BioE_COM-L	0	13.4528	0.197835	1.44928
DK	DK02	DK021	Ostsjaelland	0	9	0	1.44928	1.44928	0	1.44928	0	1.44928	0	1	18.8406	19.1176		52.8837	48.1241	48.1241	47.4267	47.4267	47.4267	47.4267	38.6667	37.9762	37.9762	37.9762	37.9762		48.1241	0	0	0	BioE_COM-S & BioE_COM-M & BioE_COM-L	0	47.4267	0.697451	1.44928
DK	DK02	DK022	Vest- og Sydsjaelland	0	9	0	1.44928	1	42	1	100	1	100	1	18.8406	19.1176		1136.44	1034.16	1034.16	1019.17	593.815	0	0	830.926	816.088	475.489	0	0		1034.16	42	100	100	BioE_COM-S	42	593.815	440.346	42.58
DK	DK03	DK031	Fyn	0	9	0	1	1	0	1	0	1	0	1	11	11.1111		1422.23	1294.23	1294.23	1281.29	1281.29	1281.29	1281.29	1140.35	1127.53	1127.53	1127.53	1127.53		1294.23	0	0	0	BioE_COM-S & BioE_COM-M & BioE_COM-L	0	1281.29	12.9423	1
DK	DK03	DK032	Sydjylland	0	9	0	1	0	100	0	100	0	100	1	11	11.1111		136.568	124.277	124.277	123.035	0	0	0	109.501	108.27	0	0	0		124.277	100	100	100		100	0	124.277	100
DK	DK04	DK041	Vestjylland	0	9	0	0	0	0	0	0	0	0	1	25	25		60.1336	54.7216	54.7216	54.7216	54.7216	54.7216	54.7216	40.6308	40.6308	40.6308	40.6308	40.6308		54.7216	100	100	100	BioE_COM-S & BioE_COM-M & BioE_COM-L	0	54.7216	0	0
DK	DK04	DK042	Ostjylland	0	9	0	0	0	100	0	100	0	100	1	25	25		240.564	218.913	218.913	218.913	0	0	0	162.543	162.543	0	0	0		218.913	100	100	100		100	0	218.913	100
DK	DK05	DK050	Nordjylland	0	9	0	0	4.13223	0	4.13223	0	4.13223	0	1	42.8571	42.8571		105.001	95.5513	95.5513	95.5513	91.6029	91.6029	91.6029	54.0548	54.0548	51.8211	51.8211	51.8211		95.5513	0	0	0	BioE_COM-S & BioE_COM-M & BioE_COM-L	0	91.6029	3.9484	4.13223
EE	EE00	EE001	Pohja-Eesti	0	9	0	4.13223	4.13223	100	4.13223	100	4.13223	100	4	99.1736	100		45	40.95	40.95	39.2579	0	0	0	0.324893	0	0	0	0		40.95	100	100	100		100	0	40.95	100
EE	EE00	EE004	Laane-Eesti	0	9	0	4.13223	4.13223	100	4.13223	100	4.13223	100	4	99.1736	100		300	273	273	261.719	0	0	0	2.16595	0	0	0	0		273	100	100	100		100	0	273	100
EE	EE00	EE006	Kesk-Eesti	0	9	0	4.13223	4.13223	100	4.13223	100	4.13223	100	4	99.1736	100		165	150.15	150.15	143.945	0	0	0	1.19127	0	0	0	0		150.15	100	100	100		100	0	150.15	100
EE	EE00	EE007	Kirde-Eesti	0	9	0	4.13223	4.13223	0	4.13223	0	4.13223	0	4	99.1736	100		0	0	0	0	0	0	0	0	0	0	0	0		0	0	0	0		0	0	0	0
EE	EE00	EE008	Louna-Eesti	0	9	0	4.13223	25.8065	100	25.8065	100	25.8065	100	4	99.1736	100		1290	1173.9	1173.9	1125.39	0	0	0	9.31359	0	0	0	0		1173.9	100	100	100		100	0	1173.9	100
EL	EL30	EL301	Boreios Tomeas Athinon	0	9	0	52.381	52.381	0	52.381	0	52.381	0	10	14.2857	30		0	0	0	0	0	0	0	0	0	0	0	0		0	0	0	0		0	0	0	0
EL	EL30	EL302	Ditikos Tomeas Athinon	0	9	0	52.381	52.381	0	52.381	0	52.381	0	10	14.2857	30		0	0	0	0	0	0	0	0	0	0	0	0		0	0	0	0		0	0	0	0
EL	EL30	EL303	Kentrikos Tomeas Athinon	0	9	0	52.381	52.381	0	52.381	0	52.381	0	10	14.2857	30		0	0	0	0	0	0	0	0	0	0	0	0		0	0	0	0		0	0	0	0
EL	EL30	EL304	Notios Tomeas Athinon	0	9	0	52.381	52.381	0	52.381	0	52.381	0	10	14.2857	30		0	0	0	0	0	0	0	0	0	0	0	0		0	0	0	0		0	0	0	0
EL	EL30	EL305	Anatoliki Attiki	0	9	0	52.381	52.381	0	52.381	0	52.381	0	10	14.2857	30		537.395	489.03	489.03	232.871	232.871	232.871	232.871	377.251	146.709	146.709	146.709	146.709		489.03	0	0	0	BioE_COM-S & BioE_COM-M & BioE_COM-L	0	232.871	256.158	52.381
EL	EL30	EL306	Ditiki Attiki	0	9	0	52.381	52.381	0	52.381	0	52.381	0	10	14.2857	30		0	0	0	0	0	0	0	0	0	0	0	0		0	0	0	0		0	0	0	0
EL	EL30	EL307	Peiraias, Nisoi	0	9	0	52.381	19.0698	0	19.0698	0	19.0698	0	10	14.2857	30		0	0	0	0	0	0	0	0	0	0	0	0		0	0	0	0		0	0	0	0
EL	EL41	EL411	Lesbos, Limnos	0	9	0	25.8065	25.8065	0	25.8065	0	25.8065	0	10	0	0		371.19	337.783	337.783	250.613	250.613	250.613	250.613	304.005	225.552	225.552	225.552	225.552		337.783	0	0	0	BioE_COM-S & BioE_COM-M & BioE_COM-L	0	250.613	87.1698	25.8065
EL	EL41	EL412	Ikaria, Samos	0	9	0	25.8065	25.8065	0	25.8065	0	25.8065	0	10	0	0		30126.9	27415.4	27415.4	20340.5	20340.5	20340.5	20340.5	24673.9	18306.4	18306.4	18306.4	18306.4		27415.4	0	0	0	BioE_COM-S & BioE_COM-M & BioE_COM-L	0	20340.5	7074.95	25.8065
EL	EL41	EL413	Xios	0	9	0	25.8065	31.8182	0	31.8182	0	31.8182	0	10	0	0		45.6546	41.5457	41.5457	30.8242	28.3266	28.3266	28.3266	37.3911	27.7418	25.494	25.494	25.494		41.5457	0	0	0	BioE_COM-S & BioE_COM-M & BioE_COM-L	0	28.3266	13.2191	31.8182
EL	EL42	EL421	Kalimnos, Karpathos, Kos, Rodos	0	9	0	31.8182	31.8182	0	31.8182	0	31.8182	0	10	0	0		407.414	370.747	370.747	252.782	252.782	252.782	252.782	333.672	227.504	227.504	227.504	227.504		370.747	0	0	0	BioE_COM-S & BioE_COM-M & BioE_COM-L	0	252.782	117.965	31.8182
EL	EL42	EL422	Andros, Thira, Kea, Milos, Mikonos, Naxos, Paros, Siros, Tinos	0	9	0	31.8182	20	0	20	0	20	0	10	0	0		119.828	109.043	109.043	74.3476	87.2345	87.2345	87.2345	98.1388	66.9128	78.511	78.511	78.511		109.043	0	0	0	BioE_COM-S & BioE_COM-M & BioE_COM-L	0	87.2345	21.8086	20
EL	EL43	EL431	Irakleio	0	9	0	20	20	0	20	0	20	0	10	8.23529	10.2941		543.288	494.392	494.392	395.514	395.514	395.514	395.514	408.31	319.319	319.319	319.319	319.319		494.392	0	0	0	BioE_COM-S & BioE_COM-M & BioE_COM-L	0	395.514	98.8784	20
EL	EL43	EL432	Lasithi	0	9	0	20	20	0	20	0	20	0	10	8.23529	10.2941		271.644	247.196	247.196	197.757	197.757	197.757	197.757	204.155	159.66	159.66	159.66	159.66		247.196	0	0	0	BioE_COM-S & BioE_COM-M & BioE_COM-L	0	197.757	49.4392	20
EL	EL43	EL433	Rethimni	0	9	0	20	20	0	20	0	20	0	10	8.23529	10.2941		563.656	512.927	512.927	410.342	410.342	410.342	410.342	423.617	331.291	331.291	331.291	331.291		512.927	0	0	0	BioE_COM-S & BioE_COM-M & BioE_COM-L	0	410.342	102.585	20
EL	EL43	EL434	Xania	0	9	0	20	16.9935	0	16.9935	0	16.9935	0	10	8.23529	10.2941		708.961	645.155	645.155	516.124	535.521	535.521	535.521	532.822	416.694	432.354	432.354	432.354		645.155	0	0	0	BioE_COM-S & BioE_COM-M & BioE_COM-L	0	535.521	109.634	16.9935
EL	EL51	EL511	Ebros	0	9	0	19.0698	19.0698	0	19.0698	0	19.0698	0	10	1.39535	1.72414		564.74	513.913	513.913	415.911	415.911	415.911	415.911	456.068	367.866	367.866	367.866	367.866		513.913	0	0	0	BioE_COM-S & BioE_COM-M & BioE_COM-L	0	415.911	98.0021	19.0698
EL	EL51	EL512	Xanthi	0	9	0	19.0698	19.0698	0	19.0698	0	19.0698	0	10	1.39535	1.72414		962.267	875.663	875.663	708.676	708.676	708.676	708.676	777.1	626.812	626.812	626.812	626.812		875.663	0	0	0	BioE_COM-S & BioE_COM-M & BioE_COM-L	0	708.676	166.987	19.0698
EL	EL51	EL513	Rodopi	0	9	0	19.0698	19.0698	0	19.0698	0	19.0698	0	10	1.39535	1.72414		1456.93	1325.81	1325.81	1072.98	1072.98	1072.98	1072.98	1176.58	949.033	949.033	949.033	949.033		1325.81	0	0	0	BioE_COM-S & BioE_COM-M & BioE_COM-L	0	1072.98	252.829	19.0698
EL	EL51	EL514	Drama	0	9	0	19.0698	19.0698	0	19.0698	0	19.0698	0	10	1.39535	1.72414		299.562	272.602	272.602	220.617	220.617	220.617	220.617	241.918	195.132	195.132	195.132	195.132		272.602	0	0	0	BioE_COM-S & BioE_COM-M & BioE_COM-L	0	220.617	51.9845	19.0698
EL	EL51	EL515	Thasos, Kabala	0	9	0	19.0698	15.3619	0	15.3619	0	15.3619	0	10	1.39535	1.72414		2454.78	2233.85	2233.85	1807.86	1890.69	1890.69	1890.69	1982.41	1599.02	1672.28	1672.28	1672.28		2233.85	0	0	0	BioE_COM-S & BioE_COM-M & BioE_COM-L	0	1890.69	343.161	15.3619
EL	EL52	EL521	Imathia	0	9	0	15.3619	15.3619	0	15.3619	0	15.3619	0	10	1.02544	1.09506		0	0	0	0	0	0	0	0	0	0	0	0		0	0	0	0		0	0	0	0
EL	EL52	EL522	Thessaloniki	0	9	0	15.3619	15.3619	0	15.3619	0	15.3619	0	10	1.02544	1.09506		812	738.92	738.92	625.408	625.408	625.408	625.408	658.209	556.704	556.704	556.704	556.704		738.92	0	0	0	BioE_COM-S & BioE_COM-M & BioE_COM-L	0	625.408	113.512	15.3619
EL	EL52	EL523	Kilkis	0	9	0	15.3619	15.3619	0	15.3619	0	15.3619	0	10	1.02544	1.09506		840	764.4	764.4	646.974	646.974	646.974	646.974	680.905	575.9	575.9	575.9	575.9		764.4	0	0	0	BioE_COM-S & BioE_COM-M & BioE_COM-L	0	646.974	117.426	15.3619
EL	EL52	EL524	Pella	0	9	0	15.3619	15.3619	0	15.3619	0	15.3619	0	10	1.02544	1.09506		73296.9	66700.2	66700.2	56453.8	56453.8	56453.8	56453.8	59414.6	50252	50252	50252	50252		66700.2	0	0	0	BioE_COM-S & BioE_COM-M & BioE_COM-L	0	56453.8	10246.4	15.3619
EL	EL52	EL525	Pieria	0	9	0	15.3619	15.3619	0	15.3619	0	15.3619	0	10	1.02544	1.09506		5967.1	5430.06	5430.06	4595.9	4595.9	4595.9	4595.9	4836.94	4091.02	4091.02	4091.02	4091.02		5430.06	0	0	0	BioE_COM-S & BioE_COM-M & BioE_COM-L	0	4595.9	834.159	15.3619
EL	EL52	EL526	Serres	0	9	0	15.3619	15.3619	0	15.3619	0	15.3619	0	10	1.02544	1.09506		805.091	732.633	732.633	620.087	620.087	620.087	620.087	652.608	551.967	551.967	551.967	551.967		732.633	0	0	0	BioE_COM-S & BioE_COM-M & BioE_COM-L	0	620.087	112.546	15.3619
EL	EL52	EL527	Xalkidiki	0	9	0	15.3619	11.7207	0	11.7207	0	11.7207	0	10	1.02544	1.09506		2100	1911	1911	1617.43	1687.02	1687.02	1687.02	1702.26	1439.75	1501.69	1501.69	1501.69		1911	0	0	0	BioE_COM-S & BioE_COM-M & BioE_COM-L	0	1687.02	223.983	11.7207
EL	EL53	EL531	Grebena, Kozani	0	9	0	11.7207	11.7207	0	11.7207	0	11.7207	0	10	1.99501	2.25989		4360.96	3968.47	3968.47	3503.34	3503.34	3503.34	3503.34	3500.37	3081.75	3081.75	3081.75	3081.75		3968.47	0	0	0	BioE_COM-S & BioE_COM-M & BioE_COM-L	0	3503.34	465.132	11.7207
EL	EL53	EL532	Kastoria	0	9	0	11.7207	11.7207	0	11.7207	0	11.7207	0	10	1.99501	2.25989		2402.63	2186.39	2186.39	1930.13	1930.13	1930.13	1930.13	1928.49	1697.86	1697.86	1697.86	1697.86		2186.39	0	0	0	BioE_COM-S & BioE_COM-M & BioE_COM-L	0	1930.13	256.26	11.7207
EL	EL53	EL533	Florina	0	9	0	11.7207	31.5315	0	31.5315	0	31.5315	0	10	1.99501	2.25989		3262.91	2969.25	2969.25	2621.23	2033	2033	2033	2619.01	2305.8	1788.35	1788.35	1788.35		2969.25	0	0	0	BioE_COM-S & BioE_COM-M & BioE_COM-L	0	2033	936.25	31.5315
EL	EL54	EL541	Arta, Prebeza	0	9	0	31.5315	31.5315	0	31.5315	0	31.5315	0	10	5.40541	7.89474		2293.56	2087.14	2087.14	1429.03	1429.03	1429.03	1429.03	1776.89	1184.59	1184.59	1184.59	1184.59		2087.14	0	0	0	BioE_COM-S & BioE_COM-M & BioE_COM-L	0	1429.03	658.106	31.5315
EL	EL54	EL542	Thesprotia	0	9	0	31.5315	31.5315	0	31.5315	0	31.5315	0	10	5.40541	7.89474		300.228	273.208	273.208	187.061	187.061	187.061	187.061	232.596	155.064	155.064	155.064	155.064		273.208	0	0	0	BioE_COM-S & BioE_COM-M & BioE_COM-L	0	187.061	86.1466	31.5315
EL	EL54	EL543	Ioannina	0	9	0	31.5315	16.4138	0	16.4138	0	16.4138	0	10	5.40541	7.89474		167.581	152.499	152.499	104.414	127.468	127.468	127.468	129.83	86.5534	105.664	105.664	105.664		152.499	0	0	0	BioE_COM-S & BioE_COM-M & BioE_COM-L	0	127.468	25.0308	16.4138
EL	EL61	EL611	Karditsa, Trikala	0	9	0	16.4138	16.4138	0	16.4138	0	16.4138	0	10	2.2069	2.47525		813.364	740.162	740.162	618.673	618.673	618.673	618.673	651.444	543.023	543.023	543.023	543.023		740.162	0	0	0	BioE_COM-S & BioE_COM-M & BioE_COM-L	0	618.673	121.489	16.4138
EL	EL61	EL612	Larisa	0	9	0	16.4138	16.4138	0	16.4138	0	16.4138	0	10	2.2069	2.47525		12015	10933.6	10933.6	9139.02	9139.02	9139.02	9139.02	9623.12	8021.53	8021.53	8021.53	8021.53		10933.6	0	0	0	BioE_COM-S & BioE_COM-M & BioE_COM-L	0	9139.02	1794.63	16.4138
EL	EL61	EL613	Magnisia	0	9	0	16.4138	50	0	50	0	50	0	10	2.2069	2.47525		5092.6	4634.26	4634.26	3873.6	2317.13	2317.13	2317.13	4078.79	3399.95	2033.8	2033.8	2033.8		4634.26	0	0	0	BioE_COM-S & BioE_COM-M & BioE_COM-L	0	2317.13	2317.13	50
EL	EL62	EL621	Zakinthos	0	9	0	50	50	0	50	0	50	0	10	0	0		18.2503	16.6077	16.6077	8.30387	8.30387	8.30387	8.30387	14.947	7.47348	7.47348	7.47348	7.47348		16.6077	0	0	0	BioE_COM-S & BioE_COM-M & BioE_COM-L	0	8.30387	8.30387	50
EL	EL62	EL622	Kerkira	0	9	0	50	50	0	50	0	50	0	10	0	0		106.025	96.4827	96.4827	48.2414	48.2414	48.2414	48.2414	86.8345	43.4172	43.4172	43.4172	43.4172		96.4827	0	0	0	BioE_COM-S & BioE_COM-M & BioE_COM-L	0	48.2414	48.2414	50
EL	EL62	EL623	Ithaki, Kefallinia	0	9	0	50	50	0	50	0	50	0	10	0	0		74.2832	67.5977	67.5977	33.7989	33.7989	33.7989	33.7989	60.8379	30.419	30.419	30.419	30.419		67.5977	0	0	0	BioE_COM-S & BioE_COM-M & BioE_COM-L	0	33.7989	33.7989	50
EL	EL62	EL624	Leikada	0	9	0	50	26.5306	0	26.5306	0	26.5306	0	10	0	0		0	0	0	0	0	0	0	0	0	0	0	0		0	0	0	0		0	0	0	0
EL	EL63	EL631	Aitoloakarnania	0	9	0	26.5306	26.5306	0	26.5306	0	26.5306	0	10	7.14286	9.72222		846.953	770.727	770.727	566.248	566.248	566.248	566.248	644.108	460.077	460.077	460.077	460.077		770.727	0	0	0	BioE_COM-S & BioE_COM-M & BioE_COM-L	0	566.248	204.479	26.5306
EL	EL63	EL632	AxaIa	0	9	0	26.5306	26.5306	0	26.5306	0	26.5306	0	10	7.14286	9.72222		1144.53	1041.52	1041.52	765.199	765.199	765.199	765.199	870.414	621.724	621.724	621.724	621.724		1041.52	0	0	0	BioE_COM-S & BioE_COM-M & BioE_COM-L	0	765.199	276.322	26.5306
EL	EL63	EL633	Ileia	0	9	0	26.5306	22.7848	0	22.7848	0	22.7848	0	10	7.14286	9.72222		304.745	277.318	277.318	203.744	214.132	214.132	214.132	231.759	165.542	173.982	173.982	173.982		277.318	0	0	0	BioE_COM-S & BioE_COM-M & BioE_COM-L	0	214.132	63.1864	22.7848
EL	EL64	EL641	Boiotia	0	9	0	22.7848	22.7848	0	22.7848	0	22.7848	0	10	4.21941	4.91803		80.9944	73.7049	73.7049	56.9114	56.9114	56.9114	56.9114	63.5355	48.7012	48.7012	48.7012	48.7012		73.7049	0	0	0	BioE_COM-S & BioE_COM-M & BioE_COM-L	0	56.9114	16.7935	22.7848
EL	EL64	EL642	Eiboia	0	9	0	22.7848	22.7848	0	22.7848	0	22.7848	0	10	4.21941	4.91803		3475.89	3163.06	3163.06	2442.37	2442.37	2442.37	2442.37	2726.64	2090.02	2090.02	2090.02	2090.02		3163.06	0	0	0	BioE_COM-S & BioE_COM-M & BioE_COM-L	0	2442.37	720.698	22.7848
EL	EL64	EL643	Eiritania	0	9	0	22.7848	22.7848	0	22.7848	0	22.7848	0	10	4.21941	4.91803		20.9045	19.0231	19.0231	14.6887	14.6887	14.6887	14.6887	16.3984	12.5697	12.5697	12.5697	12.5697		19.0231	0	0	0	BioE_COM-S & BioE_COM-M & BioE_COM-L	0	14.6887	4.33437	22.7848
EL	EL64	EL644	Fthiotida	0	9	0	22.7848	22.7848	0	22.7848	0	22.7848	0	10	4.21941	4.91803		1202.16	1093.97	1093.97	844.708	844.708	844.708	844.708	943.027	722.849	722.849	722.849	722.849		1093.97	0	0	0	BioE_COM-S & BioE_COM-M & BioE_COM-L	0	844.708	249.258	22.7848
EL	EL64	EL645	Fokida	0	9	0	22.7848	10.4079	0	10.4079	0	10.4079	0	10	4.21941	4.91803		60.0653	54.6594	54.6594	42.2054	48.9706	48.9706	48.9706	47.1178	36.1168	41.906	41.906	41.906		54.6594	0	0	0	BioE_COM-S & BioE_COM-M & BioE_COM-L	0	48.9706	5.68889	10.4079
EL	EL65	EL651	Argolida, Arkadia	0	9	0	10.4079	10.4079	0	10.4079	0	10.4079	0	10	3.93812	4.23862		6125.06	5573.8	5573.8	4993.69	4993.69	4993.69	4993.69	4818.87	4303.82	4303.82	4303.82	4303.82		5573.8	0	0	0	BioE_COM-S & BioE_COM-M & BioE_COM-L	0	4993.69	580.114	10.4079
EL	EL65	EL652	Korinthia	0	9	0	10.4079	10.4079	0	10.4079	0	10.4079	0	10	3.93812	4.23862		4267.53	3883.45	3883.45	3479.27	3479.27	3479.27	3479.27	3357.47	2998.61	2998.61	2998.61	2998.61		3883.45	0	0	0	BioE_COM-S & BioE_COM-M & BioE_COM-L	0	3479.27	404.185	10.4079
EL	EL65	EL653	Lakonia, Messinia	0	9	0	10.4079	1.08696	0	1.08696	0	1.08696	0	10	3.93812	4.23862		4239.95	3858.35	3858.35	3456.78	3816.41	3816.41	3816.41	3335.76	2979.23	3289.18	3289.18	3289.18		3858.35	0	0	0	BioE_COM-S & BioE_COM-M & BioE_COM-L	0	3816.41	41.9386	1.08696
ES	ES11	ES111	A Coruna	0	9	0	16.9935	16.9935	0	16.9935	0	16.9935	0	0	5.55556	5.90551		1919.53	1746.77	1746.77	1449.93	1449.93	1449.93	1449.93	1649.73	1364.31	1364.31	1364.31	1364.31		1746.77	0	0	0	BioE_COM-S & BioE_COM-M & BioE_COM-L	0	1449.93	296.837	16.9935
ES	ES11	ES112	Lugo	0	9	0	16.9935	16.9935	44.8454	16.9935	100	16.9935	100	0	5.55556	5.90551		1677.07	1526.13	1526.13	1266.79	698.693	0	0	1441.35	1191.98	657.432	0	0		1526.13	44.8454	100	100	BioE_COM-S	44.8454	698.693	827.439	54.218
ES	ES11	ES113	Ourense	1.89573	9	0	16.9935	16.9935	15.5213	16.9935	24.0521	16.9935	100	0	5.55556	5.90551		885.082	790.156	790.156	655.881	554.08	498.128	0	746.259	617.148	521.359	468.711	0		790.156	15.5213	24.0521	100	BioE_COM-S	15.5213	554.08	236.076	29.8772
ES	ES11	ES114	Pontevedra	0	9	0	16.9935	13.6986	90.2174	13.6986	100	13.6986	96.7391	0	5.55556	5.90551		1574.46	1432.76	1432.76	1189.29	120.961	0	40.3204	1353.16	1119.05	113.818	0	37.9393		1432.76	90.2174	100	96.7391	BioE_COM-S	90.2174	120.961	1311.8	91.5575
ES	ES12	ES120	Asturias	0	9	0	13.6986	6.66667	56.25	6.66667	100	6.66667	100	0	2.73973	2.77778		5624.38	5118.19	5118.19	4417.06	2089.93	0	0	4977.96	4294.37	2031.87	0	0		5118.19	56.25	100	100	BioE_COM-S	56.25	2089.93	3028.26	59.1667
ES	ES13	ES130	Cantabria	0	9	0	6.66667	17.4157	0	17.4157	0	17.4157	0	0	0	0		300.148	273.135	273.135	254.926	225.567	225.567	225.567	273.135	254.926	225.567	225.567	225.567		273.135	0	0	0	BioE_COM-S & BioE_COM-M & BioE_COM-L	0	225.567	47.5685	17.4157
ES	ES21	ES211	Araba/Alava	0	9	0	17.4157	17.4157	0.247001	17.4157	0	17.4157	0	0	2.24719	2.04082		153.937	140.083	140.083	115.686	115.4	115.686	115.686	136.935	113.325	113.045	113.325	113.325		140.083	0.247001	0	0	BioE_COM-M & BioE_COM-L	0	115.686	24.3964	17.4157
ES	ES21	ES212	Gipuzkoa	0	9	0	17.4157	17.4157	0	17.4157	0	17.4157	0	0	2.24719	2.04082		2023.43	1841.32	1841.32	1520.64	1520.64	1520.64	1520.64	1799.94	1489.61	1489.61	1489.61	1489.61		1841.32	0	0	0	BioE_COM-S & BioE_COM-M & BioE_COM-L	0	1520.64	320.679	17.4157
ES	ES21	ES213	Bizkaia	0	9	0	17.4157	4.1791	0	4.1791	0	4.1791	0	0	2.24719	2.04082		1431.76	1302.9	1302.9	1075.99	1248.46	1248.46	1248.46	1273.63	1054.04	1222.98	1222.98	1222.98		1302.9	0	0	0	BioE_COM-S & BioE_COM-M & BioE_COM-L	0	1248.46	54.4498	4.1791
ES	ES22	ES220	Navarra	0.0254453	9	0	4.1791	6.19048	20.9924	6.19048	45.1908	6.19048	37.659	0	9.25373	9.65732		7841.84	7134.26	7134.26	6836.11	5287.68	3668.17	4172.24	6474.08	6175.93	4777.03	3313.92	3769.31		7134.26	20.9924	45.1908	37.659	BioE_COM-S	20.9924	5287.68	1846.58	25.8833
ES	ES23	ES230	La Rioja	0.00898715	9	0	6.19048	2.37203	4.09814	2.37203	10.1735	2.37203	3.92738	0	14.7619	15.736		8691.8	7908.82	7908.82	7419.23	7404.8	6935.71	7417.98	6741.33	6251.74	6239.58	5844.3	6250.69		7908.82	4.09814	10.1735	3.92738	BioE_COM-L	3.92738	7417.98	490.842	6.20626
ES	ES24	ES241	Huesca	0	9	0	2.37203	2.37203	15.2223	2.37203	34.8621	2.37203	43.1626	0	3.72035	3.81074		32736.4	29790.2	29790.2	29083.5	24656.3	18944.4	16530.3	28681.9	27975.2	23716.8	18222.5	15900.4		29790.2	15.2223	34.8621	43.1626	BioE_COM-S	15.2223	24656.3	5133.81	17.2332
ES	ES24	ES242	Teruel	0	9	0	2.37203	2.37203	13.9722	2.37203	36.5764	2.37203	50.7681	0	3.72035	3.81074		4925.91	4482.58	4482.58	4376.25	3764.79	2775.57	2154.51	4315.81	4209.48	3621.32	2669.8	2072.41		4482.58	13.9722	36.5764	50.7681	BioE_COM-S	13.9722	3764.79	717.786	16.0128
ES	ES24	ES243	Zaragoza	0.0152138	9	0	2.37203	5.26316	12.2851	5.26316	25.7112	5.26316	22.2501	0	3.72035	3.81074		45390	41298.6	41298.6	40319	34318.5	29065.5	30419.6	39762.2	38782.5	33010.7	27957.9	29260.4		41298.6	12.2851	25.7112	22.2501	BioE_COM-S	12.2851	34318.5	6980.16	16.9017
ES	ES30	ES300	Madrid	0	9	0	5.26316	17.3913	46.3636	17.3913	59.8701	17.3913	40.4416	0	0	0		338.041	307.618	307.618	291.427	136.3	101.978	151.349	307.618	291.427	136.3	101.978	151.349		307.618	46.3636	59.8701	40.4416	BioE_COM-L	40.4416	151.349	156.268	50.7995
ES	ES41	ES411	Avila	1.01256	9	0	17.3913	17.3913	62.9405	17.3913	100	17.3913	100	0	1.15942	1.05263		1440.65	1297.71	1297.71	1072.02	397.287	0	0	1282.67	1060.74	393.105	0	0		1297.71	62.9405	100	100	BioE_COM-S	62.9405	397.287	900.426	69.3856
ES	ES41	ES412	Burgos	0.400641	9	0	17.3913	17.3913	32.2115	17.3913	82.1314	17.3913	99.7997	0	1.15942	1.05263		888.384	805.191	805.191	665.157	450.9	118.854	1.33245	795.855	658.156	446.154	117.603	1.31842		805.191	32.2115	82.1314	99.7997	BioE_COM-S	32.2115	450.9	354.291	44.0008
ES	ES41	ES413	Leon	0	9	0	17.3913	17.3913	26.8067	17.3913	50.5559	17.3913	62.9092	0	1.15942	1.05263		2268.36	2064.21	2064.21	1705.21	1248.1	843.127	632.477	2040.27	1687.26	1234.96	834.252	625.819		2064.21	26.8067	50.5559	62.9092	BioE_COM-S	26.8067	1248.1	816.103	39.5359
ES	ES41	ES414	Palencia	0	9	0	17.3913	17.3913	100	17.3913	100	17.3913	100	0	1.15942	1.05263		296.248	269.585	269.585	222.701	0	0	0	266.46	220.357	0	0	0		269.585	100	100	100		100	0	269.585	100
ES	ES41	ES415	Salamanca	0	9	0	17.3913	17.3913	67.1725	17.3913	75.0799	17.3913	63.4185	0	1.15942	1.05263		1352.46	1230.74	1230.74	1016.69	333.755	253.362	371.922	1216.47	1005.99	330.242	250.695	368.007		1230.74	67.1725	75.0799	63.4185	BioE_COM-L	63.4185	371.922	858.814	69.7805
ES	ES41	ES416	Segovia	0	9	0	17.3913	17.3913	100	17.3913	100	17.3913	100	0	1.15942	1.05263		41.312	37.5939	37.5939	31.0558	0	0	0	37.158	30.7289	0	0	0		37.5939	100	100	100		100	0	37.5939	100
ES	ES41	ES417	Soria	0	9	0	17.3913	17.3913	100	17.3913	100	17.3913	100	0	1.15942	1.05263		60.7771	55.3071	55.3071	45.6885	0	0	0	54.6659	45.2076	0	0	0		55.3071	100	100	100		100	0	55.3071	100
ES	ES41	ES418	Valladolid	0	9	0	17.3913	17.3913	40.9799	17.3913	63.3878	17.3913	100	0	1.15942	1.05263		79.8874	72.6975	72.6975	60.0544	35.4442	21.9873	0	71.8546	59.4223	35.0711	21.7558	0		72.6975	40.9799	63.3878	100	BioE_COM-S	40.9799	35.4442	37.2533	51.2442
ES	ES41	ES419	Zamora	0	9	0	17.3913	4.07407	55.1087	4.07407	78.6896	4.07407	92.9938	0	1.15942	1.05263		420.982	383.094	383.094	316.469	164.969	78.3128	25.7467	378.652	313.137	163.233	77.4885	25.4757		383.094	55.1087	78.6896	92.9938	BioE_COM-S	55.1087	164.969	218.124	56.9376
ES	ES42	ES421	Albacete	0.121936	9	0	4.07407	4.07407	41.623	4.07407	71.1255	4.07407	57.8344	0	100	100		5872.52	5337.47	5337.47	5120.02	2988.92	1478.38	2158.89	0	0	0	0	0		5337.47	41.623	71.1255	57.8344	BioE_COM-S	41.623	2988.92	2348.56	44.0013
ES	ES42	ES422	Ciudad Real	0.0189915	9	0	4.07407	4.07407	15.7582	4.07407	34.878	4.07407	14.1819	0	100	100		296.526	269.788	269.788	258.796	218.015	168.533	222.094	0	0	0	0	0		269.788	15.7582	34.878	14.1819	BioE_COM-L	14.1819	222.094	47.6937	17.6782
ES	ES42	ES423	Cuenca	0	9	0	4.07407	4.07407	34.1647	4.07407	63.6191	4.07407	53.6431	0	100	100		886.666	806.866	806.866	773.994	509.561	281.586	358.799	0	0	0	0	0		806.866	34.1647	63.6191	53.6431	BioE_COM-S	34.1647	509.561	297.305	36.8468
ES	ES42	ES424	Guadalajara	0	9	0	4.07407	4.07407	15.3309	4.07407	34.3479	4.07407	27.255	0	100	100		145.051	131.997	131.997	126.619	107.207	83.1281	92.1092	0	0	0	0	0		131.997	15.3309	34.3479	27.255	BioE_COM-S	15.3309	107.207	24.7895	18.7804
ES	ES42	ES425	Toledo	0.0194146	9	0	4.07407	6.14545	12.0783	6.14545	18.8613	6.14545	9.67092	0	100	100		2300.51	2093.06	2093.06	2007.79	1727.16	1593.91	1774.45	0	0	0	0	0		2093.06	12.0783	18.8613	9.67092	BioE_COM-L	9.67092	1774.45	318.607	15.2221
ES	ES43	ES431	Badajoz	0	9	0	6.14545	6.14545	7.81916	6.14545	19.6027	6.14545	12.4163	0	8.18182	8.67881		31818.5	28954.8	28954.8	27175.4	25050.5	21848.3	23801.2	26585.8	24816.9	22876.4	19952.1	21735.6		28954.8	7.81916	19.6027	12.4163	BioE_COM-S	7.81916	25050.5	3904.29	13.4841
ES	ES43	ES432	Caceres	2.7027	9	0	6.14545	1.64284	19.0426	1.64284	41.362	1.64284	30.0035	0	8.18182	8.67881		28025.2	24813.6	24813.6	23288.7	19758.5	14311.2	17083.3	22783.4	21267.5	18043.7	13069.2	15600.7		24813.6	19.0426	41.362	30.0035	BioE_COM-S	19.0426	19758.5	5055.18	20.3726
ES	ES51	ES511	Barcelona	0	9	0	1.64284	1.64284	8.87207	1.64284	12.6117	1.64284	7.34292	0	3.92575	3.96963		3914.05	3561.79	3561.79	3503.27	3192.46	3061.45	3246.03	3421.96	3364.21	3065.73	2939.92	3117.18		3561.79	8.87207	12.6117	7.34292	BioE_COM-L	7.34292	3246.03	315.757	8.86513
ES	ES51	ES512	Girona	0	9	0	1.64284	1.64284	33.5089	1.64284	72.3502	1.64284	97.3667	0	3.92575	3.96963		9828.47	8943.91	8943.91	8796.98	5849.21	2432.34	231.652	8592.79	8447.77	5617.02	2335.79	222.456		8943.91	33.5089	72.3502	97.3667	BioE_COM-S	33.5089	5849.21	3094.7	34.6012
ES	ES51	ES513	Lleida	0.0495172	9	0	1.64284	1.64284	5.26533	1.64284	11.3064	1.64284	5.14979	0	3.92575	3.96963		79729.2	72517.6	72517.6	71326.3	67570.7	63261.8	67653.1	69670.7	68494.9	64888.4	60750.5	64967.5		72517.6	5.26533	11.3064	5.14979	BioE_COM-L	5.14979	67653.1	4864.5	6.70803
ES	ES51	ES514	Tarragona	0.527218	9	0	1.64284	15.25	2.21102	15.25	4.3825	15.25	0.0197707	0	3.92575	3.96963		10161.1	9197.81	9197.81	9046.71	7622.8	7453.53	7793.61	8836.73	8687.59	7320.2	7157.65	7484.23		9197.81	2.21102	4.3825	0.0197707	BioE_COM-L	0.0197707	7793.61	1404.21	15.2668
ES	ES52	ES521	Alicante / Alacant	0.331332	9	0	15.25	15.25	48.8631	15.25	58.5753	15.25	40.5591	0	20.25	23.6971		15903.7	14424.4	14424.4	12224.7	6251.31	5064.03	7266.45	11503.4	9327.77	4769.93	3864	5544.51		14424.4	48.8631	58.5753	40.5591	BioE_COM-L	40.5591	7266.45	7157.93	49.6239
ES	ES52	ES522	Castellon / Castello	0.0701684	9	0	15.25	15.25	50.4511	15.25	69.6171	15.25	66.675	0	20.25	23.6971		2921.95	2657.11	2657.11	2251.9	1115.79	684.192	750.444	2119.04	1718.26	851.38	522.058	572.61		2657.11	50.4511	69.6171	66.675	BioE_COM-S	50.4511	1115.79	1541.32	58.0073
ES	ES52	ES523	Valencia / Valencia	0.0914262	9	0	15.25	7.56303	55.3815	7.56303	75.4876	7.56303	64.8466	0	20.25	23.6971		25670.6	23338.9	23338.9	19779.7	9625.92	5288.25	7583.92	18612.8	15092.5	7344.85	4035.09	5786.75		23338.9	55.3815	75.4876	64.8466	BioE_COM-S	55.3815	9625.92	13713	58.756
ES	ES53	ES531	Eivissa Y Formentera	0.21966	9	0	7.56303	7.56303	51.8671	7.56303	92.8336	7.56303	100	0	100	100		173.016	157.099	157.099	145.218	69.8974	10.4069	0	0	0	0	0	0		157.099	51.8671	92.8336	100	BioE_COM-S	51.8671	69.8974	87.2016	55.5074
ES	ES53	ES532	Mallorca	0.911334	9	0	7.56303	7.56303	5.5277	7.56303	9.31232	7.56303	4.57657	0	100	100		1724.58	1555.06	1555.06	1437.45	1358	1303.59	1371.67	0	0	0	0	0		1555.06	5.5277	9.31232	4.57657	BioE_COM-L	4.57657	1371.67	183.396	11.7935
ES	ES53	ES533	Menorca	0	9	0	7.56303	10.5624	100	10.5624	100	10.5624	100	0	100	100		113.877	103.628	103.628	95.7906	0	0	0	0	0	0	0	0		103.628	100	100	100		100	0	103.628	100
ES	ES61	ES611	Almeria	1.15539	9	0	10.5624	10.5624	74.6286	10.5624	100	10.5624	100	0	87.8944	97.9678		632.817	569.21	569.21	509.088	129.163	0	0	68.9065	10.3457	2.62485	0	0		569.21	74.6286	100	100	BioE_COM-S	74.6286	129.163	440.048	77.3085
ES	ES61	ES612	Cadiz	0.553295	9	0	10.5624	10.5624	26.2327	10.5624	46.2978	10.5624	35.9479	0	87.8944	97.9678		675.614	611.407	611.407	546.827	403.38	293.658	350.254	74.0146	11.1127	8.19752	5.96775	7.1179		611.407	26.2327	46.2978	35.9479	BioE_COM-S	26.2327	403.38	208.027	34.0243
ES	ES61	ES613	Cordoba	0.39733	9	0	10.5624	10.5624	3.3202	10.5624	5.95995	10.5624	2.45315	0	87.8944	97.9678		2075.05	1880.79	1880.79	1682.13	1626.28	1581.88	1640.87	227.681	34.1845	33.0495	32.1471	33.3459		1880.79	3.3202	5.95995	2.45315	BioE_COM-L	2.45315	1640.87	239.922	12.7565
ES	ES61	ES614	Granada	1.54167	9	0	10.5624	10.5624	14.3636	10.5624	24.8337	10.5624	21.0212	0	87.8944	97.9678		14298.4	12810.9	12810.9	11457.8	9812.03	8612.39	9049.21	1550.84	232.846	199.401	175.022	183.899		12810.9	14.3636	24.8337	21.0212	BioE_COM-S	14.3636	9812.03	2998.89	23.4088
ES	ES61	ES615	Huelva	0.0205952	9	0	10.5624	10.5624	42.5085	10.5624	75.5535	10.5624	68.2834	0	87.8944	97.9678		8028.72	7304.63	7304.63	6533.09	3755.97	1597.11	2072.07	884.271	132.766	76.3292	32.4566	42.1089		7304.63	42.5085	75.5535	68.2834	BioE_COM-S	42.5085	3755.97	3548.66	48.581
ES	ES61	ES616	Jaen	0.821696	9	0	10.5624	10.5624	0.347171	10.5624	0.256453	10.5624	0.0863565	0	87.8944	97.9678		1428.24	1289.02	1289.02	1152.87	1148.87	1149.91	1151.87	156.044	23.4287	23.3474	23.3686	23.4085		1289.02	0.347171	0.256453	0.0863565	BioE_COM-L	0.0863565	1151.87	137.147	10.6396
ES	ES61	ES617	Malaga	0.536319	9	0	10.5624	10.5624	15.7038	10.5624	25.668	10.5624	11.7237	0	87.8944	97.9678		13650.3	12355.1	12355.1	11050.1	9314.85	8213.79	9754.65	1495.67	224.562	189.297	166.921	198.235		12355.1	15.7038	25.668	11.7237	BioE_COM-L	11.7237	9754.65	2600.49	21.0479
ES	ES61	ES618	Sevilla	0.0738105	9	0	10.5624	7.79673	10.9978	7.79673	16.5889	7.79673	3.6378	0	87.8944	97.9678		10942.4	9950.22	9950.22	8899.24	8165.45	7652.49	8840.68	1204.54	180.851	165.939	155.515	179.661		9950.22	10.9978	16.5889	3.6378	BioE_COM-L	3.6378	8840.68	1109.54	11.1509
ES	ES62	ES620	Murcia	0.0569653	9	0	7.79673	0	33.8607	0	71.5873	0	37.4987	0	66.2374	71.7252		54175.5	49271.6	49271.6	45430	32587.9	13999.4	30795.4	16635.4	12845.3	9214.17	3958.31	8707.34		49271.6	100	100	100	BioE_COM-S	33.8607	32587.9	16683.7	33.8607
ES	ES63	ES630	Ceuta	0.0569653	9	0	0	0	0	0	0	0	0	0	0	0		0	0	0	0	0	0	0	0	0	0	0	0		0	100	100	100		0	0	0	0
ES	ES64	ES640	Melilla	0.0569653	9	0	0	27.9116	0	27.9116	0	27.9116	0	0	0	0		0	0	0	0	0	0	0	0	0	0	0	0		0	0	0	0		0	0	0	0
ES	ES70	ES703	El Hierro	36.036	9	0	27.9116	27.9116	100	27.9116	100	27.9116	100	0	1.80723	1.94986		596.848	347.409	347.409	250.441	0	0	0	341.13	245.558	0	0	0		347.409	100	100	100		100	0	347.409	100
ES	ES70	ES704	Fuerteventura	36.036	9	0	27.9116	27.9116	0	27.9116	0	27.9116	0	0	1.80723	1.94986		166.968	97.1873	97.1873	70.0607	70.0607	70.0607	70.0607	95.4309	68.6946	68.6946	68.6946	68.6946		97.1873	0	0	0	BioE_COM-S & BioE_COM-M & BioE_COM-L	0	70.0607	27.1266	27.9116
ES	ES70	ES705	Gran Canaria	2.68336	9	0	27.9116	27.9116	49.9106	27.9116	100	27.9116	100	0	1.80723	1.94986		5925.67	5247.66	5247.66	3782.95	1894.86	0	0	5152.82	3709.19	1857.91	0	0		5247.66	49.9106	100	100	BioE_COM-S	49.9106	1894.86	3352.8	63.8913
ES	ES70	ES706	La Gomera	20.1923	9	0	27.9116	27.9116	100	27.9116	100	27.9116	100	0	1.80723	1.94986		572.073	415.468	415.468	299.504	0	0	0	407.96	293.664	0	0	0		415.468	100	100	100		100	0	415.468	100
ES	ES70	ES707	La Palma	28.7397	9	0	27.9116	27.9116	14.7821	27.9116	51.8846	27.9116	75.6773	0	1.80723	1.94986		8457.15	5484.2	5484.2	3953.47	3369.06	1902.23	961.591	5385.08	3876.38	3303.37	1865.14	942.842		5484.2	14.7821	51.8846	75.6773	BioE_COM-S	14.7821	3369.06	2115.13	38.5678
ES	ES70	ES708	Lanzarote	0	9	0	27.9116	27.9116	100	27.9116	100	27.9116	100	0	1.80723	1.94986		140.046	127.442	127.442	91.8708	0	0	0	125.139	90.0795	0	0	0		127.442	100	100	100		100	0	127.442	100
ES	ES70	ES709	Tenerife	15.8234	9	0	27.9116	0	33.9926	0	100	0	100	0	1.80723	1.94986		10306.7	7895.03	7895.03	5691.4	5211.3	0	0	7752.35	5580.42	5109.69	0	0		7895.03	100	100	100	BioE_COM-S	33.9926	5211.3	2683.73	33.9926
FI	FI19	FI193	Keski-Suomi	15.8234	9	0	0	0	0	0	0	0	0	1	100	100		30	22.9802	22.9802	22.9802	22.9802	22.9802	22.9802	0	0	0	0	0		22.9802	100	100	100	BioE_COM-S & BioE_COM-M & BioE_COM-L	0	22.9802	0	0
FI	FI19	FI194	Etela-Pohjanmaa	15.8234	9	0	0	0	0	0	0	0	0	1	100	100		0	0	0	0	0	0	0	0	0	0	0	0		0	100	100	100		0	0	0	0
FI	FI19	FI195	Pohjanmaa	15.8234	9	0	0	0	0	0	0	0	0	1	100	100		0	0	0	0	0	0	0	0	0	0	0	0		0	100	100	100		0	0	0	0
FI	FI19	FI196	Satakunta	15.8234	9	0	0	0	0	0	0	0	0	1	100	100		15	11.4901	11.4901	11.4901	11.4901	11.4901	11.4901	0	0	0	0	0		11.4901	100	100	100	BioE_COM-S & BioE_COM-M & BioE_COM-L	0	11.4901	0	0
FI	FI19	FI197	Pirkanmaa	15.8234	9	0	0	0	0	0	0	0	0	1	100	100		30	22.9802	22.9802	22.9802	22.9802	22.9802	22.9802	0	0	0	0	0		22.9802	100	100	100	BioE_COM-S & BioE_COM-M & BioE_COM-L	0	22.9802	0	0
FI	FI1B	FI1B1	Helsinki-Uusimaa	15.8234	9	0	0	4.16667	0	4.16667	0	4.16667	0	1	27.2727	27.2727		165	126.391	126.391	126.391	121.125	121.125	121.125	91.0017	91.0017	87.2099	87.2099	87.2099		126.391	0	0	0	BioE_COM-S & BioE_COM-M & BioE_COM-L	0	121.125	5.2663	4.16667
FI	FI1C	FI1C1	Varsinais-Suomi	15.8234	9	0	4.16667	4.16667	0	4.16667	0	4.16667	0	1	45.8333	47.8261		255	195.332	195.332	187.193	187.193	187.193	187.193	104.747	96.6893	96.6893	96.6893	96.6893		195.332	0	0	0	BioE_COM-S & BioE_COM-M & BioE_COM-L	0	187.193	8.13883	4.16667
FI	FI1C	FI1C2	Kanta-Hame	15.8234	9	0	4.16667	4.16667	0	4.16667	0	4.16667	0	1	45.8333	47.8261		15	11.4901	11.4901	11.0114	11.0114	11.0114	11.0114	6.16157	5.6876	5.6876	5.6876	5.6876		11.4901	0	0	0	BioE_COM-S & BioE_COM-M & BioE_COM-L	0	11.0114	0.478755	4.16667
FI	FI1C	FI1C3	Paijat-Hame	15.8234	9	0	4.16667	4.16667	0	4.16667	0	4.16667	0	1	45.8333	47.8261		30	22.9802	22.9802	22.0227	22.0227	22.0227	22.0227	12.3231	11.3752	11.3752	11.3752	11.3752		22.9802	0	0	0	BioE_COM-S & BioE_COM-M & BioE_COM-L	0	22.0227	0.957509	4.16667
FI	FI1C	FI1C4	Kymenlaakso	15.8234	9	0	4.16667	4.16667	0	4.16667	0	4.16667	0	1	45.8333	47.8261		15	11.4901	11.4901	11.0114	11.0114	11.0114	11.0114	6.16157	5.6876	5.6876	5.6876	5.6876		11.4901	0	0	0	BioE_COM-S & BioE_COM-M & BioE_COM-L	0	11.0114	0.478755	4.16667
FI	FI1C	FI1C5	Etela-Karjala	15.8234	9	0	4.16667	16.6667	0	16.6667	0	16.6667	0	1	45.8333	47.8261		30	22.9802	22.9802	22.0227	19.1502	19.1502	19.1502	12.3231	11.3752	9.89149	9.89149	9.89149		22.9802	0	0	0	BioE_COM-S & BioE_COM-M & BioE_COM-L	0	19.1502	3.83004	16.6667
FI	FI1D	FI1D1	Etela-Savo	15.8234	9	0	16.6667	16.6667	0	16.6667	0	16.6667	0	1	100	100		45	34.4703	34.4703	28.7253	28.7253	28.7253	28.7253	0	0	0	0	0		34.4703	0	0	0	BioE_COM-S & BioE_COM-M & BioE_COM-L	0	28.7253	5.74506	16.6667
FI	FI1D	FI1D2	Pohjois-Savo	15.8234	9	0	16.6667	16.6667	0	16.6667	0	16.6667	0	1	100	100		15	11.4901	11.4901	9.57509	9.57509	9.57509	9.57509	0	0	0	0	0		11.4901	0	0	0	BioE_COM-S & BioE_COM-M & BioE_COM-L	0	9.57509	1.91502	16.6667
FI	FI1D	FI1D3	Pohjois-Karjala	15.8234	9	0	16.6667	16.6667	0	16.6667	0	16.6667	0	1	100	100		15	11.4901	11.4901	9.57509	9.57509	9.57509	9.57509	0	0	0	0	0		11.4901	0	0	0	BioE_COM-S & BioE_COM-M & BioE_COM-L	0	9.57509	1.91502	16.6667
FI	FI1D	FI1D4	Kainuu	15.8234	9	0	16.6667	16.6667	0	16.6667	0	16.6667	0	1	100	100		0	0	0	0	0	0	0	0	0	0	0	0		0	0	0	0		0	0	0	0
FI	FI1D	FI1D5	Keski-Pohjanmaa	15.8234	9	0	16.6667	16.6667	0	16.6667	0	16.6667	0	1	100	100		0	0	0	0	0	0	0	0	0	0	0	0		0	0	0	0		0	0	0	0
FI	FI1D	FI1D6	Pohjois-Pohjanmaa	15.8234	9	0	16.6667	16.6667	0	16.6667	0	16.6667	0	1	100	100		0	0	0	0	0	0	0	0	0	0	0	0		0	0	0	0		0	0	0	0
FI	FI1D	FI1D7	Lappi	15.8234	9	0	16.6667	3.33333	0	3.33333	0	3.33333	0	1	100	100		0	0	0	0	0	0	0	0	0	0	0	0		0	0	0	0		0	0	0	0
FI	FI20	FI200	Aland	15.8234	9	0	3.33333	1.08696	0	1.08696	0	1.08696	0	1	0	0		450	344.703	344.703	333.213	340.957	340.957	340.957	341.256	329.881	337.547	337.547	337.547		344.703	0	0	0	BioE_COM-S & BioE_COM-M & BioE_COM-L	0	340.957	3.74678	1.08696
FR	FR10	FR101	Paris	15.8234	9	0	1.08696	4.91803	0	4.91803	0	4.91803	0	0.25	6.52174	6.59341		0	0	0	0	0	0	0	0	0	0	0	0		0	0	0	0		0	0	0	0
FR	FR10	FR102	Seine-et-Marne	0	9	0	1.08696	1.08696	100	1.08696	100	1.08696	100	0.25	6.52174	6.59341		579.642	527.474	527.474	521.741	0	0	0	491.841	486.122	0	0	0		527.474	100	100	100		100	0	527.474	100
FR	FR10	FR103	Yvelines	0	9	0	1.08696	1.08696	100	1.08696	100	1.08696	100	0.25	6.52174	6.59341		541.479	492.746	492.746	487.39	0	0	0	459.459	454.116	0	0	0		492.746	100	100	100		100	0	492.746	100
FR	FR10	FR104	Essonne	0	9	0	1.08696	1.08696	100	1.08696	100	1.08696	100	0.25	6.52174	6.59341		74.8956	68.155	68.155	67.4142	0	0	0	63.5508	62.8119	0	0	0		68.155	100	100	100		100	0	68.155	100
FR	FR10	FR105	Hauts-de-Seine	0	9	0	1.08696	1.08696	0	1.08696	0	1.08696	0	0.25	6.52174	6.59341		0	0	0	0	0	0	0	0	0	0	0	0		0	0	0	0		0	0	0	0
FR	FR10	FR106	Seine-Saint-Denis	0	9	0	1.08696	1.08696	0	1.08696	0	1.08696	0	0.25	6.52174	6.59341		0	0	0	0	0	0	0	0	0	0	0	0		0	0	0	0		0	0	0	0
FR	FR10	FR107	Val-de-Marne	0	9	0	1.08696	1.08696	100	1.08696	100	1.08696	100	0.25	6.52174	6.59341		0	0	0	0	0	0	0	0	0	0	0	0		0	100	100	100		0	0	0	0
FR	FR10	FR108	Val-d'Oise	0	9	0	1.08696	0	100	0	100	0	100	0.25	6.52174	6.59341		1015.41	924.02	924.02	913.977	0	0	0	861.599	851.58	0	0	0		924.02	100	100	100		100	0	924.02	100
FR	FR21	FR211	Ardennes	0	9	0	0	0	100	0	100	0	100	0.25	2.85714	2.85714		336.8	306.488	306.488	306.488	0	0	0	296.986	296.986	0	0	0		306.488	100	100	100		100	0	306.488	100
FR	FR21	FR212	Aube	0	9	0	0	0	27.4536	0	62.8647	0	100	0.25	2.85714	2.85714		205.008	186.557	186.557	186.557	135.341	69.2785	0	180.774	180.774	131.145	67.1309	0		186.557	100	100	100	BioE_COM-S	27.4536	135.341	51.2166	27.4536
FR	FR21	FR213	Marne	0	9	0	0	0	24.8766	0	45.5644	0	38.975	0.25	2.85714	2.85714		219.218	199.488	199.488	199.488	149.863	108.593	121.738	193.304	193.304	145.217	105.226	117.964		199.488	100	100	100	BioE_COM-S	24.8766	149.863	49.6259	24.8766
FR	FR21	FR214	Haute-Marne	0	9	0	0	1.18343	100	1.18343	100	1.18343	100	0.25	2.85714	2.85714		0	0	0	0	0	0	0	0	0	0	0	0		0	100	100	100		0	0	0	0
FR	FR22	FR221	Aisne	0	9	0	1.18343	1.18343	65.8537	1.18343	100	1.18343	100	0.25	3.5503	3.59281		1870.88	1702.5	1702.5	1682.36	574.463	0	0	1637.95	1617.86	552.439	0	0		1702.5	65.8537	100	100	BioE_COM-S	65.8537	574.463	1128.04	66.2578
FR	FR22	FR222	Oise	0	9	0	1.18343	1.18343	100	1.18343	100	1.18343	100	0.25	3.5503	3.59281		760.857	692.38	692.38	684.186	0	0	0	666.129	657.956	0	0	0		692.38	100	100	100		100	0	692.38	100
FR	FR22	FR223	Somme	0	9	0	1.18343	0.729927	100	0.729927	100	0.729927	100	0.25	3.5503	3.59281		948.308	862.96	862.96	852.748	0	0	0	830.242	820.055	0	0	0		862.96	100	100	100		100	0	862.96	100
FR	FR23	FR231	Eure	0	9	0	0.729927	0.729927	100	0.729927	100	0.729927	100	0.25	9.12409	9.19118		3109.16	2829.34	2829.34	2808.69	0	0	0	2564.76	2544.16	0	0	0		2829.34	100	100	100		100	0	2829.34	100
FR	FR23	FR232	Seine-Maritime	0	9	0	0.729927	0.847458	100	0.847458	100	0.847458	100	0.25	9.12409	9.19118		2074.34	1887.65	1887.65	1873.87	0	0	0	1711.13	1697.38	0	0	0		1887.65	100	100	100		100	0	1887.65	100
FR	FR24	FR241	Cher	0	9	0	0.847458	0.847458	27.8454	0.847458	100	0.847458	100	0.25	6.77966	6.83761		2097.08	1908.34	1908.34	1892.17	1365.29	0	0	1774.52	1758.39	1268.76	0	0		1908.34	27.8454	100	100	BioE_COM-S	27.8454	1365.29	543.055	28.4569
FR	FR24	FR242	Eure-et-Loir	0	9	0	0.847458	0.847458	100	0.847458	100	0.847458	100	0.25	6.77966	6.83761		743.529	676.611	676.611	670.877	0	0	0	629.163	623.443	0	0	0		676.611	100	100	100		100	0	676.611	100
FR	FR24	FR243	Indre	0	9	0	0.847458	0.847458	97.1429	0.847458	100	0.847458	100	0.25	6.77966	6.83761		347.937	316.623	316.623	313.94	8.96971	0	0	294.419	291.743	8.3355	0	0		316.623	97.1429	100	100	BioE_COM-S	97.1429	8.96971	307.653	97.1671
FR	FR24	FR244	Indre-et-Loire	0	9	0	0.847458	0.847458	34.42	0.847458	100	0.847458	100	0.25	6.77966	6.83761		3881.92	3532.54	3532.54	3502.61	2297.01	0	0	3284.82	3254.96	2134.6	0	0		3532.54	34.42	100	100	BioE_COM-S	34.42	2297.01	1235.53	34.9758
FR	FR24	FR245	Loir-et-Cher	0	9	0	0.847458	0.847458	30.7586	0.847458	78.0395	0.847458	69.8995	0.25	6.77966	6.83761		426.308	387.94	387.94	384.653	266.339	84.4717	115.782	360.735	357.456	247.507	78.4991	107.596		387.94	30.7586	78.0395	69.8995	BioE_COM-S	30.7586	266.339	121.601	31.3454
FR	FR24	FR246	Loiret	0	9	0	0.847458	1.23675	100	1.23675	100	1.23675	100	0.25	6.77966	6.83761		1983.67	1805.14	1805.14	1789.84	0	0	0	1678.55	1663.29	0	0	0		1805.14	100	100	100		100	0	1805.14	100
FR	FR25	FR251	Calvados	0	9	0	1.23675	1.23675	29.4872	1.23675	100	1.23675	100	0.25	11.3074	11.449		4633.84	4216.79	4216.79	4164.64	2936.61	0	0	3730.63	3678.61	2593.89	0	0		4216.79	29.4872	100	100	BioE_COM-S	29.4872	2936.61	1280.19	30.3592
FR	FR25	FR252	Manche	0	9	0	1.23675	1.23675	0	1.23675	0	1.23675	0	0.25	11.3074	11.449		1948.66	1773.28	1773.28	1751.35	1751.35	1751.35	1751.35	1568.84	1546.96	1546.96	1546.96	1546.96		1773.28	0	0	0	BioE_COM-S & BioE_COM-M & BioE_COM-L	0	1751.35	21.931	1.23675
FR	FR25	FR253	Orne	0	9	0	1.23675	7.14286	48.6486	7.14286	100	7.14286	100	0.25	11.3074	11.449		3602.54	3278.31	3278.31	3237.77	1563.21	0	0	2900.35	2859.91	1380.78	0	0		3278.31	48.6486	100	100	BioE_COM-S	48.6486	1563.21	1715.1	52.3166
FR	FR26	FR261	Cote-d'Or	0	9	0	7.14286	7.14286	6.90717	7.14286	27.9806	7.14286	33.392	0.25	11.4286	12.3077		171.456	156.025	156.025	144.881	134.874	104.342	96.5022	137.848	126.732	117.978	91.2713	84.4134		156.025	6.90717	27.9806	33.392	BioE_COM-S	6.90717	134.874	21.1518	13.5567
FR	FR26	FR262	Nievre	0	9	0	7.14286	7.14286	20.0617	7.14286	100	7.14286	100	0.25	11.4286	12.3077		99.1576	90.2334	90.2334	83.7882	66.9788	0	0	79.7212	73.2921	58.5884	0	0		90.2334	20.0617	100	100	BioE_COM-S	20.0617	66.9788	23.2546	25.7716
FR	FR26	FR263	Saone-et-Loire	0	9	0	7.14286	7.14286	6.23836	7.14286	28.0881	7.14286	32.8988	0.25	11.4286	12.3077		210.462	191.52	191.52	177.84	166.746	127.888	119.333	169.208	155.562	145.858	111.868	104.384		191.52	6.23836	28.0881	32.8988	BioE_COM-S	6.23836	166.746	24.7743	12.9356
FR	FR26	FR264	Yonne	0	9	0	7.14286	0	7.164	0	37.5962	0	86.8561	0.25	11.4286	12.3077		1298.62	1181.74	1181.74	1097.33	1097.08	737.452	155.327	1044.07	959.87	959.652	645.072	135.869		1181.74	100	100	100	BioE_COM-S	7.164	1097.08	84.66	7.164
FR	FR30	FR301	Nord	0	9	0	0	0	100	0	100	0	100	0.25	16.3636	16.3636		908.722	826.937	826.937	826.937	0	0	0	689.891	689.891	0	0	0		826.937	100	100	100		100	0	826.937	100
FR	FR30	FR302	Pas-de-Calais	0	9	0	0	8.96861	100	8.96861	100	8.96861	100	0.25	16.3636	16.3636		122.141	111.148	111.148	111.148	0	0	0	92.7278	92.7278	0	0	0		111.148	100	100	100		100	0	111.148	100
FR	FR41	FR411	Meurthe-et-Moselle	0	9	0	8.96861	8.96861	100	8.96861	100	8.96861	100	0.25	10.7623	11.8227		1807.28	1644.62	1644.62	1497.12	0	0	0	1463.95	1316.82	0	0	0		1644.62	100	100	100		100	0	1644.62	100
FR	FR41	FR412	Meuse	0	9	0	8.96861	8.96861	100	8.96861	100	8.96861	100	0.25	10.7623	11.8227		1599.79	1455.81	1455.81	1325.24	0	0	0	1295.88	1165.64	0	0	0		1455.81	100	100	100		100	0	1455.81	100
FR	FR41	FR413	Moselle	0	9	0	8.96861	8.96861	100	8.96861	100	8.96861	100	0.25	10.7623	11.8227		493.556	449.136	449.136	408.855	0	0	0	399.797	359.616	0	0	0		449.136	100	100	100		100	0	449.136	100
FR	FR41	FR414	Vosges	0	9	0	8.96861	4.34783	100	4.34783	100	4.34783	100	0.25	10.7623	11.8227		846.151	769.998	769.998	700.94	0	0	0	685.41	616.525	0	0	0		769.998	100	100	100		100	0	769.998	100
FR	FR42	FR421	Bas-Rhin	0	9	0	4.34783	4.34783	46.2973	4.34783	61.7027	4.34783	89.5405	0.25	13.0435	13.6364		2022.02	1840.04	1840.04	1760.03	945.186	674.045	184.09	1596.03	1516.23	814.256	580.675	158.589		1840.04	46.2973	61.7027	89.5405	BioE_COM-S	46.2973	945.186	894.85	48.6322
FR	FR42	FR422	Haut-Rhin	0	9	0	4.34783	6.06061	9.2231	6.06061	18.8617	6.06061	21.7283	0.25	13.0435	13.6364		683.292	621.796	621.796	594.761	530.238	473.938	457.194	539.34	512.373	456.788	408.287	393.862		621.796	9.2231	18.8617	21.7283	BioE_COM-S	9.2231	530.238	91.5578	14.7247
FR	FR43	FR431	Doubs	0	9	0	6.06061	6.06061	100	6.06061	100	6.06061	100	0.25	21.2121	22.5806		57.9168	52.7043	52.7043	49.5101	0	0	0	41.4208	38.2346	0	0	0		52.7043	100	100	100		100	0	52.7043	100
FR	FR43	FR432	Jura	0	9	0	6.06061	6.06061	57.0144	6.06061	100	6.06061	100	0.25	21.2121	22.5806		66.3793	60.4051	60.4051	56.7442	24.3918	0	0	47.4729	43.8212	18.8368	0	0		60.4051	57.0144	100	100	BioE_COM-S	57.0144	24.3918	36.0133	59.6196
FR	FR43	FR433	Haute-Saone	0	9	0	6.06061	6.06061	100	6.06061	100	6.06061	100	0.25	21.2121	22.5806		675.568	614.767	614.767	577.508	0	0	0	483.151	445.985	0	0	0		614.767	100	100	100		100	0	614.767	100
FR	FR43	FR434	Territoire de Belfort	0	9	0	6.06061	0.46729	0	0.46729	0	0.46729	0	0.25	21.2121	22.5806		0	0	0	0	0	0	0	0	0	0	0	0		0	0	0	0		0	0	0	0
FR	FR51	FR511	Loire-Atlantique	0	9	0	0.46729	0.46729	21.125	0.46729	23.5174	0.46729	20.056	0.25	6.19159	6.22066		1820.4	1656.56	1656.56	1648.82	1300.51	1261.06	1318.13	1550.11	1542.39	1216.56	1179.66	1233.05		1656.56	21.125	23.5174	20.056	BioE_COM-L	20.056	1318.13	338.428	20.4296
FR	FR51	FR512	Maine-et-Loire	0	9	0	0.46729	0.46729	30.9285	0.46729	59.4999	0.46729	51.4095	0.25	6.19159	6.22066		11785.2	10724.5	10724.5	10674.4	7372.97	4323.14	5186.75	10035.4	9985.36	6897.04	4044.08	4851.94		10724.5	30.9285	59.4999	51.4095	BioE_COM-S	30.9285	7372.97	3351.55	31.2513
FR	FR51	FR513	Mayenne	0	9	0	0.46729	0.46729	100	0.46729	100	0.46729	100	0.25	6.19159	6.22066		1981.79	1803.43	1803.43	1795	0	0	0	1687.54	1679.13	0	0	0		1803.43	100	100	100		100	0	1803.43	100
FR	FR51	FR514	Sarthe	0	9	0	0.46729	0.46729	53.3118	0.46729	98.0614	0.46729	100	0.25	6.19159	6.22066		5255.52	4782.52	4782.52	4760.17	2222.44	92.2812	0	4475.19	4452.9	2078.98	86.3243	0		4782.52	53.3118	98.0614	100	BioE_COM-S	53.3118	2222.44	2560.08	53.53
FR	FR51	FR515	Vendee	0	9	0	0.46729	2.90909	100	2.90909	100	2.90909	96.1326	0.25	6.19159	6.22066		1445.66	1315.55	1315.55	1309.4	0	0	49.3975	1231.01	1224.88	0	0	46.2088		1315.55	100	100	96.1326	BioE_COM-L	96.1326	49.3975	1266.15	96.2451
FR	FR52	FR521	Cotes-d'Armor	0	9	0	2.90909	2.90909	0	2.90909	0	2.90909	0	0.25	15.2727	15.3558		1000.08	910.075	910.075	883.6	883.6	883.6	883.6	769.154	746.046	746.046	746.046	746.046		910.075	0	0	0	BioE_COM-S & BioE_COM-M & BioE_COM-L	0	883.6	26.4749	2.90909
FR	FR52	FR522	Finistere	0	9	0	2.90909	2.90909	0	2.90909	0	2.90909	0	0.25	15.2727	15.3558		815.56	742.159	742.159	720.569	720.569	720.569	720.569	627.239	608.395	608.395	608.395	608.395		742.159	0	0	0	BioE_COM-S & BioE_COM-M & BioE_COM-L	0	720.569	21.5901	2.90909
FR	FR52	FR523	Ille-et-Vilaine	0	9	0	2.90909	2.90909	0	2.90909	100	2.90909	100	0.25	15.2727	15.3558		2752.12	2504.43	2504.43	2431.57	2431.57	0	0	2116.63	2053.04	2053.04	0	0		2504.43	0	100	100	BioE_COM-S	0	2431.57	72.8561	2.90909
FR	FR52	FR524	Morbihan	0	9	0	2.90909	0.591716	0	0.591716	0	0.591716	0	0.25	15.2727	15.3558		896.354	815.682	815.682	791.953	810.856	810.856	810.856	689.377	668.667	684.626	684.626	684.626		815.682	0	0	0	BioE_COM-S & BioE_COM-M & BioE_COM-L	0	810.856	4.82652	0.591716
FR	FR53	FR531	Charente	0	9	0	0.591716	0.591716	7.47186	0.591716	10.5252	0.591716	3.05336	0.25	9.46746	9.52381		422.947	384.882	384.882	382.605	354.017	342.335	370.922	347.572	345.301	319.5	308.957	334.757		384.882	7.47186	10.5252	3.05336	BioE_COM-L	3.05336	370.922	13.9597	3.627
FR	FR53	FR532	Charente-Maritime	0.0753417	9	0	0.591716	0.591716	17.447	0.591716	32.8705	0.591716	17.5439	0.25	9.46746	9.52381		1372.7	1248.21	1248.21	1240.83	1024.34	832.961	1023.14	1127.21	1119.85	924.467	751.747	923.382		1248.21	17.447	32.8705	17.5439	BioE_COM-S	17.447	1024.34	223.873	17.9355
FR	FR53	FR533	Deux-Sevres	0	9	0	0.591716	0.591716	65.6051	0.591716	100	0.591716	100	0.25	9.46746	9.52381		2477.46	2254.49	2254.49	2241.15	770.842	0	0	2035.95	2022.64	695.684	0	0		2254.49	65.6051	100	100	BioE_COM-S	65.6051	770.842	1483.65	65.8086
FR	FR53	FR534	Vienne	0	9	0	0.591716	0.88634	100	0.88634	100	0.88634	100	0.25	9.46746	9.52381		183.61	167.085	167.085	166.096	0	0	0	150.888	149.902	0	0	0		167.085	100	100	100		100	0	167.085	100
FR	FR61	FR611	Dordogne	0	9	0	0.88634	0.88634	13.8908	0.88634	17.0825	0.88634	13.5986	0.25	14.9114	14.9395		7858.3	7151.06	7151.06	7087.67	6103.14	5876.92	6123.85	6069.52	6013.74	5178.38	4986.44	5195.96		7151.06	13.8908	17.0825	13.5986	BioE_COM-L	13.5986	6123.85	1027.2	14.3644
FR	FR61	FR612	Gironde	0.0721848	9	0	0.88634	0.88634	2.38811	0.88634	4.50253	0.88634	1.64822	0.25	14.9114	14.9395		3819.04	3472.82	3472.82	3442.04	3359.84	3287.06	3385.3	2947.58	2920.49	2850.75	2789	2872.36		3472.82	2.38811	4.50253	1.64822	BioE_COM-L	1.64822	3385.3	87.5133	2.51995
FR	FR61	FR613	Landes	0	9	0	0.88634	0.88634	18.1237	0.88634	43.9232	0.88634	25.3731	0.25	14.9114	14.9395		2347.04	2135.81	2135.81	2116.88	1733.22	1187.08	1579.76	1812.79	1796.13	1470.6	1007.21	1340.39		2135.81	18.1237	43.9232	25.3731	BioE_COM-S	18.1237	1733.22	402.587	18.8494
FR	FR61	FR614	Lot-et-Garonne	0	9	0	0.88634	0.88634	23.4016	0.88634	49.7207	0.88634	39.1993	0.25	14.9114	14.9395		35850.2	32623.7	32623.7	32334.5	24767.7	16257.6	19659.6	27689.7	27435.2	21014.9	13794.2	16680.8		32623.7	23.4016	49.7207	39.1993	BioE_COM-S	23.4016	24767.7	7855.96	24.0805
FR	FR61	FR615	Pyrenees-Atlantiques	0	9	0	0.88634	0.617761	97.6471	0.617761	100	0.617761	100	0.25	14.9114	14.9395		1449.56	1319.1	1319.1	1307.41	30.8459	0	0	1119.6	1109.31	26.1721	0	0		1319.1	97.6471	100	100	BioE_COM-S	97.6471	30.8459	1288.25	97.6616
FR	FR62	FR621	Ariege	0	9	0	0.617761	0.617761	100	0.617761	100	0.617761	100	0.25	4.40154	4.4289		340.34	309.709	309.709	307.796	0	0	0	295.337	293.429	0	0	0		309.709	100	100	100		100	0	309.709	100
FR	FR62	FR622	Aveyron	20.4819	9	0	0.617761	0.617761	12.0482	0.617761	100	0.617761	100	0.25	4.40154	4.4289		537.613	389.024	389.024	386.621	340.04	0	0	370.972	368.574	324.168	0	0		389.024	12.0482	100	100	BioE_COM-S	12.0482	340.04	48.9841	12.5915
FR	FR62	FR623	Haute-Garonne	0	9	0	0.617761	0.617761	6.36183	0.617761	26.5408	0.617761	22.7634	0.25	4.40154	4.4289		662.585	602.953	602.953	599.228	561.106	440.188	462.823	574.972	571.257	534.915	419.641	441.219		602.953	6.36183	26.5408	22.7634	BioE_COM-S	6.36183	561.106	41.8467	6.94029
FR	FR62	FR624	Gers	0	9	0	0.617761	0.617761	26.1864	0.617761	46.786	0.617761	25.1726	0.25	4.40154	4.4289		1552.6	1412.87	1412.87	1404.14	1036.45	747.199	1050.68	1347.3	1338.6	988.067	712.321	1001.64		1412.87	26.1864	46.786	25.1726	BioE_COM-L	25.1726	1050.68	362.186	25.6348
FR	FR62	FR625	Lot	0	9	0	0.617761	0.617761	30.2744	0.617761	96.3979	0.617761	100	0.25	4.40154	4.4289		1399.14	1273.22	1273.22	1265.35	882.276	45.5788	0	1214.14	1206.29	841.092	43.4513	0		1273.22	30.2744	96.3979	100	BioE_COM-S	30.2744	882.276	390.944	30.7052
FR	FR62	FR626	Hautes-Pyrenees	0	9	0	0.617761	0.617761	100	0.617761	100	0.617761	100	0.25	4.40154	4.4289		139.781	127.2	127.2	126.414	0	0	0	121.297	120.514	0	0	0		127.2	100	100	100		100	0	127.2	100
FR	FR62	FR627	Tarn	0	9	0	0.617761	0.617761	10.0177	0.617761	18.9518	0.617761	8.53605	0.25	4.40154	4.4289		1356.88	1234.76	1234.76	1227.13	1104.2	994.571	1122.39	1177.46	1169.85	1052.66	948.146	1070		1234.76	10.0177	18.9518	8.53605	BioE_COM-L	8.53605	1122.39	112.377	9.10107
FR	FR62	FR628	Tarn-et-Garonne	0	9	0	0.617761	0.37594	8.08246	0.37594	20.5825	0.37594	13.7435	0.25	4.40154	4.4289		28813.5	26220.3	26220.3	26058.3	24010.4	20745.2	22531.7	25003.5	24841.9	22889.7	19776.9	21479.9		26220.3	8.08246	20.5825	13.7435	BioE_COM-S	8.08246	24010.4	2209.85	8.42802
FR	FR63	FR631	Correze	0	9	0	0.37594	0.37594	33.3333	0.37594	73.8318	0.37594	100	0.25	11.2782	11.3208		3975.46	3617.67	3617.67	3604.07	2402.71	943.121	0	3201.64	3188.07	2125.38	834.262	0		3617.67	33.3333	73.8318	100	BioE_COM-S	33.3333	2402.71	1214.96	33.584
FR	FR63	FR632	Creuse	0	9	0	0.37594	0.37594	0	0.37594	0	0.37594	0	0.25	11.2782	11.3208		141.603	128.859	128.859	128.374	128.374	128.374	128.374	114.04	113.557	113.557	113.557	113.557		128.859	0	0	0	BioE_COM-S & BioE_COM-M & BioE_COM-L	0	128.374	0.484432	0.37594
FR	FR63	FR633	Haute-Vienne	0	9	0	0.37594	1.70293	100	1.70293	100	1.70293	100	0.25	11.2782	11.3208		1685.74	1534.03	1534.03	1528.26	0	0	0	1357.61	1351.86	0	0	0		1534.03	100	100	100		100	0	1534.03	100
FR	FR71	FR711	Ain	2.25225	9	0	1.70293	1.70293	100	1.70293	100	1.70293	100	0.25	12.9612	13.0895		147.333	131.053	131.053	128.821	0	0	0	113.782	111.679	0	0	0		131.053	100	100	100		100	0	131.053	100
FR	FR71	FR712	Ardeche	0	9	0	1.70293	1.70293	24.5112	1.70293	68.7649	1.70293	58.6552	0.25	12.9612	13.0895		9023.89	8211.74	8211.74	8071.9	6093.38	2521.27	3337.31	7129.53	6997.79	5282.55	2185.77	2893.22		8211.74	24.5112	68.7649	58.6552	BioE_COM-S	24.5112	6093.38	2118.36	25.7967
FR	FR71	FR713	Drome	0.52654	9	0	1.70293	1.70293	14.302	1.70293	21.0474	1.70293	18.0305	0.25	12.9612	13.0895		26438.6	23932.4	23932.4	23524.9	20160.4	18573.5	19283.2	20778.4	20394.5	17477.7	16102	16717.3		23932.4	14.302	21.0474	18.0305	BioE_COM-S	14.302	20160.4	3772.08	15.7614
FR	FR71	FR714	Isere	2.06612	9	0	1.70293	1.70293	14.4628	1.70293	25.2525	1.70293	33.7925	0.25	12.9612	13.0895		4604.53	4103.55	4103.55	4033.67	3450.29	3015.07	2670.59	3562.75	3496.92	2991.16	2613.86	2315.22		4103.55	14.4628	25.2525	33.7925	BioE_COM-S	14.4628	3450.29	653.262	15.9195
FR	FR71	FR715	Loire	0	9	0	1.70293	1.70293	4.42055	1.70293	46.595	1.70293	43.1302	0.25	12.9612	13.0895		2714.52	2470.21	2470.21	2428.15	2320.81	1296.75	1380.88	2144.67	2105.04	2011.98	1124.2	1197.13		2470.21	4.42055	46.595	43.1302	BioE_COM-S	4.42055	2320.81	149.404	6.0482
FR	FR71	FR716	Rhone	0	9	0	1.70293	1.70293	4.62339	1.70293	15.3552	1.70293	10.5328	0.25	12.9612	13.0895		5985.47	5446.78	5446.78	5354.02	5106.48	4531.9	4790.1	4728.96	4641.57	4426.98	3928.85	4152.69		5446.78	4.62339	15.3552	10.5328	BioE_COM-S	4.62339	5106.48	340.292	6.24759
FR	FR71	FR717	Savoie	17.8177	9	0	1.70293	1.70293	56.0773	1.70293	100	1.70293	100	0.25	12.9612	13.0895		817.544	611.408	611.408	600.996	263.973	0	0	530.831	521.023	228.847	0	0		611.408	56.0773	100	100	BioE_COM-S	56.0773	263.973	347.434	56.8253
FR	FR71	FR718	Haute-Savoie	0	9	0	1.70293	4.7619	100	4.7619	100	4.7619	100	0.25	12.9612	13.0895		886.499	806.714	806.714	792.976	0	0	0	700.399	687.456	0	0	0		806.714	100	100	100		100	0	806.714	100
FR	FR72	FR721	Allier	0	9	0	4.7619	4.7619	100	4.7619	100	4.7619	100	0.25	19.0476	20		100.374	91.3408	91.3408	86.9912	0	0	0	73.7577	69.419	0	0	0		91.3408	100	100	100		100	0	91.3408	100
FR	FR72	FR722	Cantal	0	9	0	4.7619	4.7619	0	4.7619	0	4.7619	0	0.25	19.0476	20		17.1518	15.6081	15.6081	14.8649	14.8649	14.8649	14.8649	12.6036	11.8622	11.8622	11.8622	11.8622		15.6081	0	0	0	BioE_COM-S & BioE_COM-M & BioE_COM-L	0	14.8649	0.743244	4.7619
FR	FR72	FR723	Haute-Loire	0	9	0	4.7619	4.7619	0	4.7619	0	4.7619	0	0.25	19.0476	20		0	0	0	0	0	0	0	0	0	0	0	0		0	0	0	0		0	0	0	0
FR	FR72	FR724	Puy-de-Dome	0	9	0	4.7619	2.04473	100	2.04473	100	2.04473	100	0.25	19.0476	20		283.626	258.099	258.099	245.809	0	0	0	208.415	196.156	0	0	0		258.099	100	100	100		100	0	258.099	100
FR	FR81	FR811	Aude	0.150173	9	0	2.04473	2.04473	3.48025	2.04473	8.82265	2.04473	0.570656	0.25	8.24281	8.28441		1458.27	1325.03	1325.03	1297.94	1252.77	1183.43	1290.53	1212.77	1187.44	1146.11	1082.67	1180.66		1325.03	3.48025	8.82265	0.570656	BioE_COM-L	0.570656	1290.53	34.5001	2.60372
FR	FR81	FR812	Gard	0.00397062	9	0	2.04473	2.04473	4.89577	2.04473	8.13977	2.04473	2.65237	0.25	8.24281	8.28441		19257.7	17523.8	17523.8	17165.5	16325.1	15768.2	16710.2	16039.1	15704	14935.2	14425.8	15287.5		17523.8	4.89577	8.13977	2.65237	BioE_COM-L	2.65237	16710.2	813.606	4.64287
FR	FR81	FR813	Herault	0.229795	9	0	2.04473	2.04473	5.68137	2.04473	8.48124	2.04473	2.05001	0.25	8.24281	8.28441		3826.69	3474.29	3474.29	3403.25	3209.9	3114.61	3333.48	3179.94	3113.51	2936.62	2849.44	3049.68		3474.29	5.68137	8.48124	2.05001	BioE_COM-L	2.05001	3333.48	140.807	4.05282
FR	FR81	FR814	Lozere	0.229795	9	0	2.04473	2.04473	0	2.04473	0	2.04473	0	0.25	8.24281	8.28441		81.2454	73.7634	73.7634	72.2551	72.2551	72.2551	72.2551	67.514	66.1036	66.1036	66.1036	66.1036		73.7634	0	0	0	BioE_COM-S & BioE_COM-M & BioE_COM-L	0	72.2551	1.50826	2.04473
FR	FR81	FR815	Pyrenees-Orientales	0.188398	9	0	2.04473	1.11607	4.81984	1.11607	11.3588	1.11607	7.15127	0.25	8.24281	8.28441		15263.9	13864	13864	13580.5	13048.5	12152.1	12728.9	12689.4	12424.3	11937.6	11117.5	11645.2		13864	4.81984	11.3588	7.15127	BioE_COM-S	4.81984	13048.5	815.498	5.88212
FR	FR82	FR821	Alpes-de-Haute-Provence	0	9	0	1.11607	1.11607	42.0334	1.11607	59.7876	1.11607	94.5372	0.25	4.64286	4.65011		5097.29	4638.53	4638.53	4586.77	2658.79	1844.45	250.567	4412.12	4362.54	2528.82	1754.28	238.318		4638.53	42.0334	59.7876	94.5372	BioE_COM-S	42.0334	2658.79	1979.74	42.6803
FR	FR82	FR822	Hautes-Alpes	0.619195	9	0	1.11607	1.11607	17.6471	1.11607	24.2518	1.11607	86.9969	0.25	4.64286	4.65011		4737.02	4284	4284	4236.19	3488.62	3208.83	550.835	4074.89	4029.1	3318.08	3051.97	523.908		4284	17.6471	24.2518	86.9969	BioE_COM-S	17.6471	3488.62	795.375	18.5662
FR	FR82	FR823	Alpes-Maritimes	10.2142	9	0	1.11607	1.11607	64.4152	1.11607	100	1.11607	100	0.25	4.64286	4.65011		89.338	72.9937	72.9937	72.179	25.6848	0	0	69.4307	68.6506	24.4292	0	0		72.9937	64.4152	100	100	BioE_COM-S	64.4152	25.6848	47.3089	64.8123
FR	FR82	FR824	Bouches-du-Rhone	0.0852031	9	0	1.11607	1.11607	25.3763	1.11607	42.6015	1.11607	29.2673	0.25	4.64286	4.65011		24026.8	21845.8	21845.8	21601.9	16120.2	12399.2	15279.6	20779.4	20545.9	15332.1	11793.1	14532.7		21845.8	25.3763	42.6015	29.2673	BioE_COM-S	25.3763	16120.2	5725.59	26.2092
FR	FR82	FR825	Var	0.178627	9	0	1.11607	1.11607	16.8065	1.11607	45.876	1.11607	26.1417	0.25	4.64286	4.65011		989.555	898.887	898.887	888.854	739.469	481.083	656.493	855.01	845.403	703.321	457.565	624.401		898.887	16.8065	45.876	26.1417	BioE_COM-S	16.8065	739.469	159.417	17.735
FR	FR82	FR826	Vaucluse	0.011556	9	0	1.11607	0.746269	2.67522	0.746269	5.55844	0.746269	2.91212	0.25	4.64286	4.65011		21468.6	19534.2	19534.2	19316.2	18869.7	18310.7	18823.8	18580.7	18371.9	17947.3	17415.6	17903.6		19534.2	2.67522	5.55844	2.91212	BioE_COM-S	2.67522	18869.7	664.459	3.40152
FR	FR83	FR831	Corse-du-Sud	5.26316	9	0	0.746269	0.746269	100	0.746269	100	0.746269	100	0.25	44.0299	44.3609		162.337	139.952	139.952	138.907	0	0	0	78.1353	77.0935	0	0	0		139.952	100	100	100		100	0	139.952	100
FR	FR83	FR832	Haute-Corse	0.0390625	9	0	0.746269	39.4102	27.9297	39.4102	66.4062	39.4102	100	0.25	44.0299	44.3609		3000.43	2729.32	2729.32	2708.95	1191.82	555.537	0	1523.79	1503.47	661.46	308.323	0		2729.32	27.9297	66.4062	100	BioE_COM-S	27.9297	1191.82	1537.5	56.3327
FR	FRA1	FRA10	Guadeloupe	0.0390625	9	0	4.91803	1.42653	0	1.42653	0	1.42653	0	0.25	0	0		8540	7768.36	7768.36	7386.31	7657.55	7657.55	7657.55	7748.94	7367.85	7638.4	7638.4	7638.4		7768.36	0	0	0	BioE_COM-S & BioE_COM-M & BioE_COM-L	0	7657.55	110.818	1.42653
FR	FRA2	FRA20	Martinique	0.0390625	9	0	1.42653	21.4575	0	21.4575	0	21.4575	0	0.25	0	0		19628	17854.5	17854.5	17599.8	14023.4	14023.4	14023.4	17809.9	17555.8	13988.3	13988.3	13988.3		17854.5	0	0	0	BioE_COM-S & BioE_COM-M & BioE_COM-L	0	14023.4	3831.13	21.4575
FR	FRA3	FRA30	Guyane	0.0390625	9	0	21.4575	18.2186	0	18.2186	0	18.2186	0	0.25	0	0		3705	3370.23	3370.23	2647.07	2756.22	2756.22	2756.22	3361.81	2640.45	2749.33	2749.33	2749.33		3370.23	0	0	0	BioE_COM-S & BioE_COM-M & BioE_COM-L	0	2756.22	614.01	18.2186
FR	FRA4	FRA40	La Reunion	0.0390625	9	0	18.2186	0.622084	0	0.622084	0	0.622084	0	0.25	0.404858	0.49505		6868.47	6247.87	6247.87	5109.59	6209	6209	6209	6207.02	5071.59	6162.82	6162.82	6162.82		6247.87	0	0	0	BioE_COM-S & BioE_COM-M & BioE_COM-L	0	6209	38.867	0.622084
HR	HR03	HR031	Primorsko-Goranska Zupanija	2.78422	9	0	39.4102	39.4102	82.5986	39.4102	100	39.4102	100	0.25	0.268097	0.442478		129.642	114.69	114.69	69.4903	12.0923	0	0	114.096	69.0098	12.0087	0	0		114.69	82.5986	100	100	BioE_COM-S	82.5986	12.0923	102.597	89.4565
HR	HR03	HR032	Licko-Senjska Zupanija	12.5828	9	0	39.4102	39.4102	100	39.4102	100	39.4102	100	0.25	0.268097	0.442478		1115.57	887.429	887.429	537.691	0	0	0	882.837	533.974	0	0	0		887.429	100	100	100		100	0	887.429	100
HR	HR03	HR033	Zadarska Zupanija	4.52518	9	0	39.4102	39.4102	78.84	39.4102	100	39.4102	100	0.25	0.268097	0.442478		2885.17	2506.7	2506.7	1518.8	321.378	0	0	2493.73	1508.3	319.156	0	0		2506.7	78.84	100	100	BioE_COM-S	78.84	321.378	2185.32	87.1792
HR	HR03	HR034	Sibensko-Kninska Zupanija	4.2328	9	0	39.4102	39.4102	31.0185	39.4102	87.5	39.4102	100	0.25	0.268097	0.442478		461.859	402.501	402.501	243.875	168.228	30.4843	0	400.419	242.189	167.065	30.2736	0		402.501	31.0185	87.5	100	BioE_COM-S	31.0185	168.228	234.273	58.2042
HR	HR03	HR035	Splitsko-Dalmatinska Zupanija	9.2623	9	0	39.4102	39.4102	61.3934	39.4102	100	39.4102	100	0.25	0.268097	0.442478		2283.26	1885.32	1885.32	1142.31	441.006	0	0	1875.56	1134.41	437.957	0	0		1885.32	61.3934	100	100	BioE_COM-S	61.3934	441.006	1444.31	76.6084
HR	HR03	HR036	Istarska Zupanija	0.0794281	9	0	39.4102	39.4102	47.8157	39.4102	99.8411	39.4102	100	0.25	0.268097	0.442478		1099.12	999.408	999.408	605.539	315.996	0.961937	0	994.237	601.353	313.812	0.955287	0		999.408	47.8157	99.8411	100	BioE_COM-S	47.8157	315.996	683.412	68.3816
HR	HR03	HR037	Dubrovacko-Neretvanska Zupanija	4.11208	9	0	39.4102	19.1566	34.9345	19.1566	77.8384	19.1566	100	0.25	0.268097	0.442478		1255.44	1095.47	1095.47	663.745	576.231	196.267	0	1089.8	659.156	572.247	194.91	0		1095.47	34.9345	77.8384	100	BioE_COM-S	34.9345	576.231	519.242	47.3989
HR	HR04	HR041	Grad Zagreb	4.11208	9	0	19.1566	19.1566	0	19.1566	0	19.1566	0	0.25	6.80723	7.89866		1201.53	1048.43	1048.43	847.59	847.59	847.59	847.59	974.623	778.69	778.69	778.69	778.69		1048.43	0	0	0	BioE_COM-S & BioE_COM-M & BioE_COM-L	0	847.59	200.845	19.1566
HR	HR04	HR042	Zagrebacka Zupanija	0	9	0	19.1566	19.1566	6.66667	19.1566	100	19.1566	100	0.25	6.80723	7.89866		3212.43	2923.31	2923.31	2363.3	2205.75	0	0	2717.51	2171.19	2026.45	0	0		2923.31	6.66667	100	100	BioE_COM-S	6.66667	2205.75	717.562	24.5462
HR	HR04	HR043	Krapinsko-Zagorska Zupanija	0	9	0	19.1566	19.1566	27.7778	19.1566	100	19.1566	100	0.25	6.80723	7.89866		1372	1248.52	1248.52	1009.35	728.972	0	0	1160.62	927.297	669.714	0	0		1248.52	27.7778	100	100	BioE_COM-S	27.7778	728.972	519.548	41.6131
HR	HR04	HR044	Varazdinska Zupanija	0	9	0	19.1566	19.1566	93.3333	19.1566	100	19.1566	100	0.25	6.80723	7.89866		1708	1554.28	1554.28	1256.53	83.7688	0	0	1444.86	1154.39	76.9593	0	0		1554.28	93.3333	100	100	BioE_COM-S	93.3333	83.7688	1470.51	94.6104
HR	HR04	HR045	Koprivnicko-Krizevacka Zupanija	0	9	0	19.1566	19.1566	0	19.1566	0	19.1566	0	0.25	6.80723	7.89866		2212	2012.92	2012.92	1627.31	1627.31	1627.31	1627.31	1871.21	1495.03	1495.03	1495.03	1495.03		2012.92	0	0	0	BioE_COM-S & BioE_COM-M & BioE_COM-L	0	1627.31	385.608	19.1566
HR	HR04	HR046	Medimurska Zupanija	0	9	0	19.1566	19.1566	3.78788	19.1566	100	19.1566	100	0.25	6.80723	7.89866		2268	2063.88	2063.88	1668.51	1605.31	0	0	1918.58	1532.88	1474.81	0	0		2063.88	3.78788	100	100	BioE_COM-S	3.78788	1605.31	458.571	22.2189
HR	HR04	HR047	Bjelovarsko-Bilogorska Zupanija	0	9	0	19.1566	19.1566	100	19.1566	100	19.1566	100	0.25	6.80723	7.89866		2827.04	2572.61	2572.61	2079.78	0	0	0	2391.49	1910.72	0	0	0		2572.61	100	100	100		100	0	2572.61	100
HR	HR04	HR048	Viroviticko-Podravska Zupanija	0	9	0	19.1566	19.1566	43.1373	19.1566	100	19.1566	100	0.25	6.80723	7.89866		3849.25	3502.82	3502.82	2831.79	1610.24	0	0	3256.21	2601.6	1479.34	0	0		3502.82	43.1373	100	100	BioE_COM-S	43.1373	1610.24	1892.58	54.0302
HR	HR04	HR049	Pozesko-Slavonska Zupanija	0	9	0	19.1566	19.1566	62.3077	19.1566	100	19.1566	100	0.25	6.80723	7.89866		3093.13	2814.75	2814.75	2275.54	857.702	0	0	2616.58	2090.56	787.98	0	0		2814.75	62.3077	100	100	BioE_COM-S	62.3077	857.702	1957.04	69.5283
HR	HR04	HR04A	Brodsko-Posavska Zupanija	0	9	0	19.1566	19.1566	25.731	19.1566	100	19.1566	100	0.25	6.80723	7.89866		4556.44	4146.36	4146.36	3352.06	2489.54	0	0	3854.45	3079.57	2287.17	0	0		4146.36	25.731	100	100	BioE_COM-S	25.731	2489.54	1656.82	39.9584
HR	HR04	HR04B	Osjecko-Baranjska Zupanija	0	9	0	19.1566	19.1566	9.80114	19.1566	67.0455	19.1566	100	0.25	6.80723	7.89866		10772.7	9803.16	9803.16	7925.21	7148.45	2611.72	0	9113	7280.98	6567.36	2399.41	0		9803.16	9.80114	67.0455	100	BioE_COM-S	9.80114	7148.45	2654.72	27.0802
HR	HR04	HR04C	Vukovarsko-Srijemska Zupanija	0	9	0	19.1566	19.1566	14.3137	19.1566	61.3725	19.1566	100	0.25	6.80723	7.89866		4088	3720.08	3720.08	3007.44	2576.96	1161.7	0	3458.18	2762.97	2367.48	1067.26	0		3720.08	14.3137	61.3725	100	BioE_COM-S	14.3137	2576.96	1143.12	30.7283
HR	HR04	HR04D	Karlovacka Zupanija	0	9	0	19.1566	19.1566	100	19.1566	100	19.1566	100	0.25	6.80723	7.89866		1354.69	1232.77	1232.77	996.613	0	0	0	1145.98	915.6	0	0	0		1232.77	100	100	100		100	0	1232.77	100
HR	HR04	HR04E	Sisacko-Moslavacka Zupanija	0	9	0	19.1566	8.03324	10.989	8.03324	100	8.03324	100	0.25	6.80723	7.89866		3723.93	3388.78	3388.78	2739.6	2774.07	0	0	3150.2	2516.9	2548.57	0	0		3388.78	10.989	100	100	BioE_COM-S	10.989	2774.07	614.706	18.1395
HU	HU10	HU101	Budapest	0	9	0	8.03324	8.03324	100	8.03324	100	8.03324	100	0	3.87812	4.21687		560.985	510.496	510.496	469.487	0	0	0	490.698	449.689	0	0	0		510.496	100	100	100		100	0	510.496	100
HU	HU10	HU102	Pest	0	9	0	8.03324	14.9533	51.8344	14.9533	99.4441	14.9533	100	0	3.87812	4.21687		17923	16309.9	16309.9	14999.7	6681.09	77.1043	0	15677.4	14367.2	6399.36	73.853	0		16309.9	51.8344	99.4441	100	BioE_COM-S	51.8344	6681.09	9628.85	59.0367
HU	HU21	HU211	Fejer	0	9	0	14.9533	14.9533	73.0878	14.9533	100	14.9533	100	0	8.09969	9.52381		5064.08	4608.31	4608.31	3919.22	1054.75	0	0	4235.05	3545.96	954.295	0	0		4608.31	73.0878	100	100	BioE_COM-S	73.0878	1054.75	3553.57	77.1121
HU	HU21	HU212	Komarom-Esztergom	0	9	0	14.9533	14.9533	98.4602	14.9533	100	14.9533	100	0	8.09969	9.52381		837.612	762.227	762.227	648.249	9.98159	0	0	700.489	586.511	9.03096	0	0		762.227	98.4602	100	100	BioE_COM-S	98.4602	9.98159	752.245	98.6905
HU	HU21	HU213	Veszprem	0	9	0	14.9533	27.9188	94.0329	27.9188	100	27.9188	100	0	8.09969	9.52381		2416.39	2198.92	2198.92	1870.11	94.5796	0	0	2020.81	1692	85.572	0	0		2198.92	94.0329	100	100	BioE_COM-S	94.0329	94.5796	2104.34	95.6988
HU	HU22	HU221	Gyor-Moson-Sopron	0	9	0	27.9188	27.9188	95.4307	27.9188	100	27.9188	100	0	13.4518	18.662		3272.05	2977.56	2977.56	2146.26	98.0689	0	0	2577.03	1745.73	79.7673	0	0		2977.56	95.4307	100	100	BioE_COM-S	95.4307	98.0689	2879.49	96.7064
HU	HU22	HU222	Vas	0	9	0	27.9188	27.9188	80.5774	27.9188	100	27.9188	100	0	13.4518	18.662		2678.54	2437.47	2437.47	1756.96	341.247	0	0	2109.59	1429.08	277.564	0	0		2437.47	80.5774	100	100	BioE_COM-S	80.5774	341.247	2096.23	86
HU	HU22	HU223	Zala	0	9	0	27.9188	25.5319	95.3101	25.5319	100	25.5319	100	0	13.4518	18.662		4928	4484.48	4484.48	3232.47	156.618	0	0	3881.24	2629.23	127.39	0	0		4484.48	95.3101	100	100	BioE_COM-S	95.3101	156.618	4327.86	96.5075
HU	HU23	HU231	Baranya	0	9	0	25.5319	25.5319	71.9337	25.5319	100	25.5319	100	0	7.80142	10.4762		3013.05	2741.88	2741.88	2041.82	573.066	0	0	2527.97	1827.92	513.03	0	0		2741.88	71.9337	100	100	BioE_COM-S	71.9337	573.066	2168.81	79.0995
HU	HU23	HU232	Somogy	0	9	0	25.5319	25.5319	65.1393	25.5319	99.8111	25.5319	100	0	7.80142	10.4762		5503.27	5007.98	5007.98	3729.35	1300.07	7.04647	0	4617.29	3338.65	1163.88	6.30827	0		5007.98	65.1393	99.8111	100	BioE_COM-S	65.1393	1300.07	3707.9	74.0399
HU	HU23	HU233	Tolna	0	9	0	25.5319	18.0645	74.251	18.0645	100	18.0645	100	0	7.80142	10.4762		3183.07	2896.59	2896.59	2157.04	611.111	0	0	2670.62	1931.06	547.09	0	0		2896.59	74.251	100	100	BioE_COM-S	74.251	611.111	2285.48	78.9024
HU	HU31	HU311	Borsod-Abauj-Zemplen	0	9	0	18.0645	18.0645	45.7715	18.0645	97.5454	18.0645	99.8144	0	7.74194	9.44882		15279.2	13904.1	13904.1	11392.4	6177.93	279.64	21.1492	12827.7	10315.9	5594.19	253.217	19.1509		13904.1	45.7715	97.5454	99.8144	BioE_COM-S	45.7715	6177.93	7726.17	55.5676
HU	HU31	HU312	Heves	0	9	0	18.0645	18.0645	28.0357	18.0645	84.2489	18.0645	99.0472	0	7.74194	9.44882		7975.53	7257.73	7257.73	5946.66	4279.47	936.662	56.6578	6695.84	5384.77	3875.11	848.158	51.3043		7257.73	28.0357	84.2489	99.0472	BioE_COM-S	28.0357	4279.47	2978.26	41.0357
HU	HU31	HU313	Nograd	0	9	0	18.0645	15.095	77.4869	15.095	100	15.095	100	0	7.74194	9.44882		2116.44	1925.96	1925.96	1578.04	368.142	0	0	1776.85	1428.94	333.357	0	0		1925.96	77.4869	100	100	BioE_COM-S	77.4869	368.142	1557.82	80.8853
HU	HU32	HU321	Hajdu-Bihar	0	9	0	15.095	15.095	52.0433	15.095	82.4519	15.095	76.5625	0	5.46824	6.44042		5258.81	4785.52	4785.52	4063.14	1948.55	713.004	952.299	4523.83	3801.46	1823.06	667.083	890.967		4785.52	52.0433	82.4519	76.5625	BioE_COM-S	52.0433	1948.55	2836.96	59.2823
HU	HU32	HU322	Jasz-Nagykun-Szolnok	0	9	0	15.095	15.095	65.0881	15.095	98.348	15.095	100	0	5.46824	6.44042		3213.37	2924.17	2924.17	2482.77	866.781	41.0149	0	2764.27	2322.87	810.957	38.3733	0		2924.17	65.0881	98.348	100	BioE_COM-S	65.0881	866.781	2057.39	70.358
HU	HU32	HU323	Szabolcs-Szatmar-Bereg	0	9	0	15.095	11.4453	17.9078	11.4453	31.9694	11.4453	11.2384	0	5.46824	6.44042		76523.1	69636	69636	59124.5	50623	41951.7	54735.7	65828.2	55316.6	47362.6	39249.8	51210.5		69636	17.9078	31.9694	11.2384	BioE_COM-L	11.2384	54735.7	14900.3	21.3974
HU	HU33	HU331	Bacs-Kiskun	0	9	0	11.4453	11.4453	27.0023	11.4453	53.0687	11.4453	36.0753	0	3.42523	3.86792		20473.2	18630.6	18630.6	16498.3	12043.4	7742.88	10546.5	17992.5	15860.2	11577.6	7443.39	10138.6		18630.6	27.0023	53.0687	36.0753	BioE_COM-S	27.0023	12043.4	6587.25	35.3571
HU	HU33	HU332	Bekes	0	9	0	11.4453	11.4453	100	11.4453	100	11.4453	100	0	3.42523	3.86792		2057.24	1872.09	1872.09	1657.83	0	0	0	1807.97	1593.7	0	0	0		1872.09	100	100	100		100	0	1872.09	100
HU	HU33	HU333	Csongrad	0	9	0	11.4453	0	65.4063	0	96.1384	0	100	0	3.42523	3.86792		8188.73	7451.75	7451.75	6598.87	2577.84	287.759	0	7196.51	6343.63	2478.13	276.628	0		7451.75	100	100	100	BioE_COM-S	65.4063	2577.84	4873.91	65.4063
IE	IE01	IE011	Border	0	9	0	0	0	0	0	0	0	0	1	0	0		60	54.6	54.6	54.6	54.6	54.6	54.6	54.054	54.054	54.054	54.054	54.054		54.6	100	100	100	BioE_COM-S & BioE_COM-M & BioE_COM-L	0	54.6	0	0
IE	IE01	IE012	Midland	0	9	0	0	0	0	0	0	0	0	1	0	0		45	40.95	40.95	40.95	40.95	40.95	40.95	40.5405	40.5405	40.5405	40.5405	40.5405		40.95	100	100	100	BioE_COM-S & BioE_COM-M & BioE_COM-L	0	40.95	0	0
IE	IE01	IE013	West	0	9	0	0	0	0	0	0	0	0	1	0	0		45	40.95	40.95	40.95	40.95	40.95	40.95	40.5405	40.5405	40.5405	40.5405	40.5405		40.95	100	100	100	BioE_COM-S & BioE_COM-M & BioE_COM-L	0	40.95	0	0
IE	IE02	IE021	Dublin	0	9	0	0	0	0	0	0	0	0	1	0	0		240	218.4	218.4	218.4	218.4	218.4	218.4	216.216	216.216	216.216	216.216	216.216		218.4	100	100	100	BioE_COM-S & BioE_COM-M & BioE_COM-L	0	218.4	0	0
IE	IE02	IE022	Mid-East	0	9	0	0	0	0	0	0	0	0	1	0	0		105	95.55	95.55	95.55	95.55	95.55	95.55	94.5945	94.5945	94.5945	94.5945	94.5945		95.55	100	100	100	BioE_COM-S & BioE_COM-M & BioE_COM-L	0	95.55	0	0
IE	IE02	IE023	Mid-West	0	9	0	0	0	0	0	0	0	0	1	0	0		30	27.3	27.3	27.3	27.3	27.3	27.3	27.027	27.027	27.027	27.027	27.027		27.3	100	100	100	BioE_COM-S & BioE_COM-M & BioE_COM-L	0	27.3	0	0
IE	IE02	IE024	South-East (IE)	0	9	0	0	0	0	0	0	0	0	1	0	0		345	313.95	313.95	313.95	313.95	313.95	313.95	310.81	310.81	310.81	310.81	310.81		313.95	100	100	100	BioE_COM-S & BioE_COM-M & BioE_COM-L	0	313.95	0	0
IE	IE02	IE025	South-West (IE)	0	9	0	0	6.4833	0	6.4833	0	6.4833	0	1	0	0		75	68.25	68.25	68.25	63.8251	63.8251	63.8251	67.5675	67.5675	63.1869	63.1869	63.1869		68.25	0	0	0	BioE_COM-S & BioE_COM-M & BioE_COM-L	0	63.8251	4.42485	6.4833
IT	ITC1	ITC11	Torino	5.75221	9	0	6.4833	6.4833	73.0088	6.4833	79.2035	6.4833	99.115	0	20.7269	21.2185		5208.5	4467.09	4467.09	4177.48	1127.55	868.767	36.9688	3541.2	3291.08	888.3	684.428	29.1246		4467.09	73.0088	79.2035	99.115	BioE_COM-S	73.0088	1127.55	3339.54	74.7588
IT	ITC1	ITC12	Vercelli	0	9	0	6.4833	6.4833	0	6.4833	0	6.4833	100	0	20.7269	21.2185		1882.29	1712.89	1712.89	1601.84	1601.84	1601.84	0	1357.86	1261.95	1261.95	1261.95	0		1712.89	0	0	100	BioE_COM-S & BioE_COM-M	0	1601.84	111.052	6.4833
IT	ITC1	ITC13	Biella	0	9	0	6.4833	6.4833	16.6667	6.4833	0	6.4833	100	0	20.7269	21.2185		347.183	315.936	315.936	295.453	246.211	295.453	0	250.453	232.763	193.969	232.763	0		315.936	16.6667	0	100	BioE_COM-M	0	295.453	20.4831	6.4833
IT	ITC1	ITC14	Verbano-Cusio-Ossola	0	9	0	6.4833	6.4833	0	6.4833	0	6.4833	0	0	20.7269	21.2185		37.8834	34.4739	34.4739	32.2388	32.2388	32.2388	32.2388	27.3285	25.3982	25.3982	25.3982	25.3982		34.4739	0	0	0	BioE_COM-S & BioE_COM-M & BioE_COM-L	0	32.2388	2.23504	6.4833
IT	ITC1	ITC15	Novara	0	9	0	6.4833	6.4833	100	6.4833	100	6.4833	100	0	20.7269	21.2185		220.139	200.327	200.327	187.339	0	0	0	158.805	147.589	0	0	0		200.327	100	100	100		100	0	200.327	100
IT	ITC1	ITC16	Cuneo	0.307613	9	0	6.4833	6.4833	1.07665	6.4833	1.97385	6.4833	2.384	0	20.7269	21.2185		36347.8	32974.8	32974.8	30836.9	30504.9	30228.2	30101.8	26140.1	24293.8	24032.2	23814.3	23714.6		32974.8	1.07665	1.97385	2.384	BioE_COM-S	1.07665	30504.9	2469.86	7.49015
IT	ITC1	ITC17	Asti	0	9	0	6.4833	6.4833	5.98876	6.4833	6.81419	6.4833	3.72322	0	20.7269	21.2185		1635.6	1488.39	1488.39	1391.9	1308.54	1297.05	1340.07	1179.89	1096.56	1030.89	1021.83	1055.73		1488.39	5.98876	6.81419	3.72322	BioE_COM-L	3.72322	1340.07	148.32	9.96513
IT	ITC1	ITC18	Alessandria	0	9	0	6.4833	50	13.157	50	36.5124	50	37.6262	0	20.7269	21.2185		3601.51	3277.37	3277.37	3064.89	1423.08	1040.36	1022.11	2598.07	2414.57	1121.13	819.614	805.235		3277.37	13.157	36.5124	37.6262	BioE_COM-S	13.157	1423.08	1854.29	56.5785
IT	ITC2	ITC20	Valle d'Aosta/Vallee D'Aoste	23.4848	9	0	50	60.5263	100	60.5263	100	60.5263	100	0	5	10		301.766	210.116	210.116	105.058	0	0	0	199.61	94.5522	0	0	0		210.116	100	100	100		100	0	210.116	100
IT	ITC3	ITC31	Imperia	4.50089	9	0	60.5263	60.5263	19.2068	60.5263	33.066	60.5263	34.7594	0	34.2105	80		71.5657	62.1936	62.1936	24.5501	19.8348	16.4324	16.0166	40.9168	4.91002	3.96696	3.28647	3.20333		62.1936	19.2068	33.066	34.7594	BioE_COM-S	19.2068	19.8348	42.3588	68.1079
IT	ITC3	ITC32	Savona	5.27778	9	0	60.5263	60.5263	84.1667	60.5263	99.7222	60.5263	95.5556	0	34.2105	80		516.701	445.382	445.382	175.809	27.8364	0.488358	7.81372	293.015	35.1618	5.56728	0.0976716	1.56274		445.382	84.1667	99.7222	95.5556	BioE_COM-S	84.1667	27.8364	417.546	93.75
IT	ITC3	ITC33	Genova	6.59341	9	0	60.5263	60.5263	100	60.5263	100	60.5263	100	0	34.2105	80		238.71	202.903	202.903	80.0934	0	0	0	133.489	16.0187	0	0	0		202.903	100	100	100		100	0	202.903	100
IT	ITC3	ITC34	La Spezia	12.459	9	0	60.5263	11.9159	98.0328	11.9159	100	11.9159	100	0	34.2105	80		149.361	118.984	118.984	46.9675	2.06176	0	0	78.2791	9.3935	0.412352	0	0		118.984	98.0328	100	100	BioE_COM-S	98.0328	2.06176	116.923	98.2672
IT	ITC4	ITC41	Varese	12.459	9	0	11.9159	11.9159	0	11.9159	0	11.9159	0	0	9.57944	10.0796		109.703	87.3916	87.3916	76.9781	76.9781	76.9781	76.9781	79.02	69.219	69.219	69.219	69.219		87.3916	0	0	0	BioE_COM-S & BioE_COM-M & BioE_COM-L	0	76.9781	10.4135	11.9159
IT	ITC4	ITC42	Como	12.459	9	0	11.9159	11.9159	0	11.9159	0	11.9159	0	0	9.57944	10.0796		67.9452	54.1267	54.1267	47.677	47.677	47.677	47.677	48.9417	42.8714	42.8714	42.8714	42.8714		54.1267	0	0	0	BioE_COM-S & BioE_COM-M & BioE_COM-L	0	47.677	6.44968	11.9159
IT	ITC4	ITC43	Lecco	0	9	0	11.9159	11.9159	100	11.9159	100	11.9159	100	0	9.57944	10.0796		45.7086	41.5948	41.5948	36.6384	0	0	0	37.6103	32.9454	0	0	0		41.5948	100	100	100		100	0	41.5948	100
IT	ITC4	ITC44	Sondrio	43.3234	9	0	11.9159	11.9159	31.1573	11.9159	100	11.9159	100	0	9.57944	10.0796		2069.77	1067.5	1067.5	940.298	647.327	0	0	965.24	845.52	582.079	0	0		1067.5	31.1573	100	100	BioE_COM-S	31.1573	647.327	420.173	39.3605
IT	ITC4	ITC46	Bergamo	11.7647	9	0	11.9159	11.9159	100	11.9159	100	11.9159	100	0	9.57944	10.0796		259.576	208.424	208.424	183.588	0	0	0	188.458	165.084	0	0	0		208.424	100	100	100		100	0	208.424	100
IT	ITC4	ITC47	Brescia	8.75576	9	0	11.9159	11.9159	95.3917	11.9159	100	11.9159	74.1935	0	9.57944	10.0796		886.931	736.439	736.439	648.686	29.8934	0	167.403	665.892	583.301	26.8802	0	150.529		736.439	95.3917	100	74.1935	BioE_COM-L	74.1935	167.403	569.036	77.2686
IT	ITC4	ITC48	Pavia	0	9	0	11.9159	11.9159	0.680934	11.9159	4.0856	11.9159	0.453956	0	9.57944	10.0796		1252.97	1140.2	1140.2	1004.34	997.498	963.304	999.778	1030.98	903.104	896.954	866.207	899.004		1140.2	0.680934	4.0856	0.453956	BioE_COM-L	0.453956	999.778	140.424	12.3158
IT	ITC4	ITC49	Lodi	0	9	0	11.9159	11.9159	0	11.9159	100	11.9159	66.6667	0	9.57944	10.0796		56	50.96	50.96	44.8877	44.8877	0	14.9626	46.0783	40.3632	40.3632	0	13.4544		50.96	0	100	66.6667	BioE_COM-S	0	44.8877	6.07234	11.9159
IT	ITC4	ITC4A	Cremona	0	9	0	11.9159	11.9159	100	11.9159	100	11.9159	100	0	9.57944	10.0796		448	407.68	407.68	359.101	0	0	0	368.627	322.905	0	0	0		407.68	100	100	100		100	0	407.68	100
IT	ITC4	ITC4B	Mantova	0	9	0	11.9159	11.9159	68.4211	11.9159	100	11.9159	100	0	9.57944	10.0796		5235.86	4764.63	4764.63	4196.88	1325.33	0	0	4308.21	3773.85	1191.74	0	0		4764.63	68.4211	100	100	BioE_COM-S	68.4211	1325.33	3439.3	72.184
IT	ITC4	ITC4C	Milano	0	9	0	11.9159	11.9159	0	11.9159	100	11.9159	89.1089	0	9.57944	10.0796		83.9813	76.423	76.423	67.3165	67.3165	0	7.3315	69.1021	60.5313	60.5313	0	6.59251		76.423	0	100	89.1089	BioE_COM-S	0	67.3165	9.10647	11.9159
IT	ITC4	ITC4D	Monza e della Brianza	0	9	0	11.9159	15.3846	100	15.3846	100	15.3846	100	0	9.57944	10.0796		27.9835	25.465	25.465	22.4306	0	0	0	23.0256	20.1697	0	0	0		25.465	100	100	100		100	0	25.465	100
IT	ITF1	ITF11	L'Aquila	19.1919	9	0	15.3846	15.3846	36.6667	15.3846	100	15.3846	97.2727	0	14.5749	17.2249		171.698	126.259	126.259	106.834	67.6618	0	2.91367	107.857	88.4323	56.0071	0	2.41179		126.259	36.6667	100	97.2727	BioE_COM-S	36.6667	67.6618	58.5971	46.4103
IT	ITF1	ITF12	Teramo	0.273224	9	0	15.3846	15.3846	50.6375	15.3846	87.1585	15.3846	66.8488	0	14.5749	17.2249		1102.24	1000.3	1000.3	846.406	417.807	108.691	280.594	854.506	700.614	345.84	89.9695	232.262		1000.3	50.6375	87.1585	66.8488	BioE_COM-S	50.6375	417.807	582.491	58.2318
IT	ITF1	ITF13	Pescara	0	9	0	15.3846	15.3846	2.3277	15.3846	5.81926	15.3846	0	0	14.5749	17.2249		973.249	885.656	885.656	749.402	731.958	705.792	749.402	756.573	620.318	605.879	584.22	620.318		885.656	2.3277	5.81926	0	BioE_COM-L	0	749.402	136.255	15.3846
IT	ITF1	ITF14	Chieti	0	9	0	15.3846	7	4.50898	7	4.07956	7	1.27698	0	14.5749	17.2249		3756.23	3418.17	3418.17	2892.29	3035.56	3049.21	3138.3	2919.97	2394.1	2512.69	2523.99	2597.73		3418.17	4.50898	4.07956	1.27698	BioE_COM-L	1.27698	3138.3	279.865	8.18759
IT	ITF2	ITF21	Isernia	3.21229	9	0	7	7	1.95531	7	6.14525	7	44.6927	0	22	23.6559		220.555	194.258	194.258	180.66	177.128	169.558	99.9181	151.521	137.923	135.226	129.447	76.2816		194.258	1.95531	6.14525	44.6927	BioE_COM-S	1.95531	177.128	17.1305	8.81844
IT	ITF2	ITF22	Campobasso	0	9	0	7	11.7349	17.373	11.7349	35.8916	11.7349	19.3204	0	22	23.6559		2101.86	1912.7	1912.7	1778.81	1394.94	1082.31	1362.07	1491.9	1358.01	1064.96	826.277	1039.86		1912.7	17.373	35.8916	19.3204	BioE_COM-S	17.373	1394.94	517.752	27.0692
IT	ITF3	ITF31	Caserta	1.26258	9	0	11.7349	11.7349	10.2104	11.7349	16.3586	11.7349	3.56816	0	22.8366	25.6337		34146.9	30681.3	30681.3	27080.9	24315.8	22650.8	26114.6	23674.8	20139.1	18082.8	16844.6	19420.5		30681.3	10.2104	16.3586	3.56816	BioE_COM-L	3.56816	26114.6	4566.72	14.8843
IT	ITF3	ITF32	Benevento	3.69336	9	0	11.7349	11.7349	11.4881	11.7349	28.5806	11.7349	10.3285	0	22.8366	25.6337		2012.68	1763.89	1763.89	1556.9	1378.04	1111.93	1396.1	1361.08	1157.81	1024.8	826.902	1038.23		1763.89	11.4881	28.5806	10.3285	BioE_COM-L	10.3285	1396.1	367.797	20.8514
IT	ITF3	ITF33	Napoli	1.86722	9	0	11.7349	11.7349	10.6698	11.7349	26.3189	11.7349	17.2792	0	22.8366	25.6337		10834.4	9675.24	9675.24	8539.86	7628.67	6292.26	7064.24	7465.74	6350.78	5673.16	4679.32	5253.42		9675.24	10.6698	26.3189	17.2792	BioE_COM-S	10.6698	7628.67	2046.57	21.1526
IT	ITF3	ITF34	Avellino	2.75925	9	0	11.7349	11.7349	15.6307	11.7349	20.1183	11.7349	10.1425	0	22.8366	25.6337		803.825	711.297	711.297	627.827	529.693	501.519	564.15	548.861	466.892	393.914	372.961	419.537		711.297	15.6307	20.1183	10.1425	BioE_COM-L	10.1425	564.15	147.148	20.6872
IT	ITF3	ITF35	Salerno	3.79151	9	0	11.7349	16.2474	9.426	16.2474	17.7559	16.2474	10.2785	0	22.8366	25.6337		8544.12	7480.36	7480.36	6602.54	5674.46	5152.59	5621.05	5772.1	4910.07	4219.89	3831.79	4180.17		7480.36	9.426	17.7559	10.2785	BioE_COM-S	9.426	5674.46	1805.9	24.1419
IT	ITF4	ITF43	Taranto	0.279406	9	0	16.2474	16.2474	1.71051	16.2474	1.88088	16.2474	0	0	31.6038	37.5469		1600.2	1452.11	1452.11	1216.18	1195.38	1193.31	1216.18	993.188	759.542	746.55	745.256	759.542		1452.11	1.71051	1.88088	0	BioE_COM-L	0	1216.18	235.93	16.2474
IT	ITF4	ITF44	Brindisi	0.0466466	9	0	16.2474	16.2474	0.523479	16.2474	0.55976	16.2474	0	0	31.6038	37.5469		2146.03	1951.98	1951.98	1634.83	1626.27	1625.68	1634.83	1335.08	1021	1015.66	1015.29	1021		1951.98	0.523479	0.55976	0	BioE_COM-L	0	1634.83	317.145	16.2474
IT	ITF4	ITF45	Lecce	0.748363	9	0	16.2474	16.2474	0.22217	16.2474	0.00389772	16.2474	0	0	31.6038	37.5469		604.645	546.109	546.109	457.381	456.364	457.363	457.381	373.518	285.648	285.014	285.637	285.648		546.109	0.22217	0.00389772	0	BioE_COM-L	0	457.381	88.7284	16.2474
IT	ITF4	ITF46	Foggia	1.33333	9	0	16.2474	16.2474	8.51596	16.2474	23.3359	16.2474	18.1814	0	31.6038	37.5469		2891.55	2596.23	2596.23	2174.41	1989.24	1666.99	1779.07	1775.72	1357.98	1242.34	1041.09	1111.08		2596.23	8.51596	23.3359	18.1814	BioE_COM-S	8.51596	1989.24	606.991	23.3797
IT	ITF4	ITF47	Bari	0.0293036	9	0	16.2474	16.2474	0.687006	16.2474	1.70612	16.2474	1.40006	0	31.6038	37.5469		24641.5	22417.2	22417.2	18775	18646	18454.7	18512.1	15332.5	11725.6	11645	11525.5	11561.4		22417.2	0.687006	1.70612	1.40006	BioE_COM-S	0.687006	18646	3771.19	16.8228
IT	ITF4	ITF48	Barletta-Andria-Trani	0.0974002	9	0	16.2474	4.66884	0.869109	4.66884	1.7532	4.66884	1.0714	0	31.6038	37.5469		7974.04	7249.31	7249.31	6071.49	6850.79	6789.69	6836.81	4958.25	3791.83	4278.53	4240.37	4269.8		7249.31	0.869109	1.7532	1.0714	BioE_COM-S	0.869109	6850.79	398.521	5.49737
IT	ITF5	ITF51	Potenza	0.79976	9	0	4.66884	4.66884	39.888	4.66884	65.1105	4.66884	40.2579	0	26.6015	27.7904		2484.24	2242.57	2242.57	2137.87	1285.12	745.894	1277.21	1646.02	1543.75	927.977	538.607	922.267		2242.57	39.888	65.1105	40.2579	BioE_COM-S	39.888	1285.12	957.457	42.6946
IT	ITF5	ITF52	Matera	0.104778	9	0	4.66884	9.52381	12.8877	9.52381	19.4363	9.52381	6.20285	0	26.6015	27.7904		21605.3	19640.2	19640.2	18723.2	15479.6	14315.9	16667.5	14415.6	13520	11177.8	10337.5	12035.5		19640.2	12.8877	19.4363	6.20285	BioE_COM-L	6.20285	16667.5	2972.72	15.1359
IT	ITF6	ITF61	Cosenza	0.92792	9	0	9.52381	9.52381	6.42088	9.52381	11.5866	9.52381	7.0464	0	26.455	29.0936		10952.7	9874.5	9874.5	8934.07	8360.43	7898.92	8304.54	7262.2	6334.83	5928.08	5600.84	5888.46		9874.5	6.42088	11.5866	7.0464	BioE_COM-S	6.42088	8360.43	1514.07	15.3332
IT	ITF6	ITF62	Crotone	0.118561	9	0	9.52381	9.52381	5.33527	9.52381	7.48255	9.52381	3.12212	0	26.455	29.0936		395.94	359.879	359.879	325.604	308.233	301.241	315.439	264.673	230.874	218.557	213.599	223.666		359.879	5.33527	7.48255	3.12212	BioE_COM-L	3.12212	315.439	44.4399	12.3486
IT	ITF6	ITF63	Catanzaro	1.25781	9	0	9.52381	9.52381	2.8637	9.52381	2.65802	9.52381	0.229412	0	26.455	29.0936		1627.96	1462.81	1462.81	1323.49	1285.59	1288.32	1320.46	1075.82	938.442	911.568	913.498	936.289		1462.81	2.8637	2.65802	0.229412	BioE_COM-L	0.229412	1320.46	142.351	9.73137
IT	ITF6	ITF64	Vibo Valentia	1.32953	9	0	9.52381	9.52381	1.66192	9.52381	4.0994	9.52381	0	0	26.455	29.0936		477.386	428.646	428.646	387.822	381.377	371.924	387.822	315.248	274.991	270.421	263.718	274.991		428.646	1.66192	4.0994	0	BioE_COM-L	0	387.822	40.8234	9.52381
IT	ITF6	ITF65	Reggio di Calabria	1.80523	9	0	9.52381	11.745	2.44141	11.745	5.48638	11.745	3.47996	0	26.455	29.0936		2600.61	2323.84	2323.84	2102.52	2000.83	1938.38	1979.53	1709.06	1490.82	1418.72	1374.44	1403.62		2323.84	2.44141	5.48638	3.47996	BioE_COM-S	2.44141	2000.83	323.005	13.8996
IT	ITG1	ITG11	Trapani	0.726864	9	0	11.745	11.745	0.610046	11.745	3.0459	11.745	3.39203	0	75.2517	84.7909		224.922	203.191	203.191	179.326	178.233	173.864	173.244	50.2864	27.274	27.1076	26.4433	26.3489		203.191	0.610046	3.0459	3.39203	BioE_COM-S	0.610046	178.233	24.9587	12.2834
IT	ITG1	ITG12	Palermo	4.10254	9	0	11.745	11.745	17.1458	11.745	33.5842	11.745	9.92531	0	75.2517	84.7909		3217.77	2808.04	2808.04	2478.24	2053.33	1645.94	2232.27	694.943	376.919	312.293	250.333	339.508		2808.04	17.1458	33.5842	9.92531	BioE_COM-L	9.92531	2232.27	575.777	20.5045
IT	ITG1	ITG13	Messina	7.413	9	0	11.745	11.745	24.3451	11.745	35.6534	11.745	35.2306	0	75.2517	84.7909		1576.19	1328.01	1328.01	1172.03	886.699	754.163	759.118	328.659	178.256	134.859	114.702	115.455		1328.01	24.3451	35.6534	35.2306	BioE_COM-S	24.3451	886.699	441.307	33.2308
IT	ITG1	ITG14	Agrigento	0.814321	9	0	11.745	11.745	6.72993	11.745	13.231	11.745	2.69197	0	75.2517	84.7909		3927.48	3544.91	3544.91	3128.56	2918.01	2714.62	3044.34	877.305	475.826	443.804	412.87	463.017		3544.91	6.72993	13.231	2.69197	BioE_COM-L	2.69197	3044.34	500.568	14.1208
IT	ITG1	ITG15	Caltanissetta	0	9	0	11.745	11.745	28.9975	11.745	67.9514	11.745	24.7993	0	75.2517	84.7909		4152.41	3778.69	3778.69	3334.88	2367.85	1068.78	2507.86	935.162	507.207	360.129	162.553	381.423		3778.69	28.9975	67.9514	24.7993	BioE_COM-L	24.7993	2507.86	1270.83	33.6316
IT	ITG1	ITG16	Enna	0	9	0	11.745	11.745	56.9181	11.745	65.6368	11.745	57.2782	0	75.2517	84.7909		1643.66	1495.73	1495.73	1320.06	568.706	453.614	563.952	370.168	200.769	86.4952	68.9907	85.7722		1495.73	56.9181	65.6368	57.2782	BioE_COM-S	56.9181	568.706	927.025	61.9781
IT	ITG1	ITG17	Catania	0.0502849	9	0	11.745	11.745	60.0682	11.745	80.0816	11.745	51.9835	0	75.2517	84.7909		4680.01	4256.67	4256.67	3756.73	1500.13	748.281	1803.85	1053.45	571.365	228.157	113.807	274.35		4256.67	60.0682	80.0816	51.9835	BioE_COM-L	51.9835	1803.85	2452.82	57.623
IT	ITG1	ITG18	Ragusa	0.223104	9	0	11.745	11.745	4.79673	11.745	13.9688	11.745	2.86316	0	75.2517	84.7909		622.861	565.539	565.539	499.116	475.175	429.396	484.826	139.961	75.9112	72.27	65.3074	73.7378		565.539	4.79673	13.9688	2.86316	BioE_COM-L	2.86316	484.826	80.7129	14.2719
IT	ITG1	ITG19	Siracusa	0.143102	9	0	11.745	17.4888	36.7869	17.4888	69.1853	17.4888	41.7573	0	75.2517	84.7909		588.257	534.548	534.548	471.766	278.809	135.912	256.887	132.292	71.7514	42.4044	20.671	39.0702		534.548	36.7869	69.1853	41.7573	BioE_COM-S	36.7869	278.809	255.739	47.8421
IT	ITG2	ITG25	Sassari	0.0901984	9	0	17.4888	17.4888	4.78052	17.4888	9.65123	17.4888	17.8292	0	14.7982	17.9348		552.984	502.761	502.761	414.834	395.003	374.798	340.873	428.362	340.435	324.16	307.579	279.738		502.761	4.78052	9.65123	17.8292	BioE_COM-S	4.78052	395.003	107.758	21.4333
IT	ITG2	ITG26	Nuoro	1.55239	9	0	17.4888	17.4888	58.6028	17.4888	100	17.4888	100	0	14.7982	17.9348		363.005	325.206	325.206	268.332	111.082	0	0	277.082	220.207	91.1594	0	0		325.206	58.6028	100	100	BioE_COM-S	58.6028	111.082	214.125	65.8427
IT	ITG2	ITG27	Cagliari	0	9	0	17.4888	17.4888	37.8788	17.4888	95.0413	17.4888	99.449	0	14.7982	17.9348		1721.09	1566.2	1566.2	1292.29	802.784	64.0803	7.12004	1334.43	1060.52	658.807	52.5877	5.84307		1566.2	37.8788	95.0413	99.449	BioE_COM-S	37.8788	802.784	763.411	48.743
IT	ITG2	ITG28	Oristano	0.218579	9	0	17.4888	17.4888	34.0984	17.4888	63.2787	17.4888	99.2896	0	14.7982	17.9348		362.619	329.262	329.262	271.678	179.04	99.7637	1.92995	280.537	222.953	146.93	81.8713	1.58382		329.262	34.0984	63.2787	99.2896	BioE_COM-S	34.0984	179.04	150.222	45.6238
IT	ITG2	ITG29	Olbia-Tempio	0	9	0	17.4888	17.4888	53.0806	17.4888	100	17.4888	100	0	14.7982	17.9348		84.3492	76.7578	76.7578	63.3338	29.7158	0	0	65.399	51.975	24.3864	0	0		76.7578	53.0806	100	100	BioE_COM-S	53.0806	29.7158	47.0419	61.2862
IT	ITG2	ITG2A	Ogliastra	1.81818	9	0	17.4888	17.4888	83.2727	17.4888	100	17.4888	100	0	14.7982	17.9348		497.688	444.662	444.662	366.896	61.3717	0	0	378.86	301.094	50.3648	0	0		444.662	83.2727	100	100	BioE_COM-S	83.2727	61.3717	383.29	86.1981
IT	ITG2	ITG2B	Medio Campidano	0	9	0	17.4888	17.4888	55.4463	17.4888	95.3101	17.4888	100	0	14.7982	17.9348		958.569	872.298	872.298	719.744	320.673	33.755	0	743.214	590.659	263.161	27.7011	0		872.298	55.4463	95.3101	100	BioE_COM-S	55.4463	320.673	551.626	63.2382
IT	ITG2	ITG2C	Carbonia-Iglesias	0.980392	9	0	17.4888	11.7271	16.1765	11.7271	46.5686	11.7271	100	0	14.7982	17.9348		122.894	110.737	110.737	91.3704	81.9382	52.2296	0	94.3499	74.9834	67.2427	42.8623	0		110.737	16.1765	46.5686	100	BioE_COM-S	16.1765	81.9382	28.7988	26.0065
IT	ITH1	ITH10	Bolzano-Bozen	18.7184	9	0	11.7271	22.1137	2.60764	22.1137	5.21528	22.1137	9.82414	0	7.67591	8.15217		30767.3	22757.4	22757.4	20088.6	17262.7	16800.5	15983.6	21010.6	18451	15855.4	15430.9	14680.6		22757.4	2.60764	5.21528	9.82414	BioE_COM-S	2.60764	17262.7	5494.7	24.1447
IT	ITH2	ITH20	Trento	17.3829	9	0	22.1137	5.77378	15.4273	5.77378	23.0082	5.77378	13.3752	0	3.19716	3.53478		21421.4	16105	16105	12543.6	12834	11683.6	13145.4	15590.1	12100.2	12380.3	11270.6	12680.7		16105	15.4273	23.0082	13.3752	BioE_COM-L	13.3752	13145.4	2959.56	18.3767
IT	ITH3	ITH31	Verona	4.30307	9	0	5.77378	5.77378	1.6706	5.77378	4.26932	5.77378	2.32872	0	7.57217	7.83526		41988.5	36565.3	36565.3	34454.1	33878.5	32983.2	33651.8	33796.5	31754.5	31224	30398.8	31015.1		36565.3	1.6706	4.26932	2.32872	BioE_COM-S	1.6706	33878.5	2686.79	7.34793
IT	ITH3	ITH32	Vicenza	2.26804	9	0	5.77378	5.77378	25.3608	5.77378	24.5361	5.77378	21.4433	0	7.57217	7.83526		1509.07	1342.1	1342.1	1264.61	943.898	954.327	993.439	1240.48	1165.53	869.941	879.553	915.601		1342.1	25.3608	24.5361	21.4433	BioE_COM-L	21.4433	993.439	348.665	25.979
IT	ITH3	ITH33	Belluno	2.26804	9	0	5.77378	5.77378	0	5.77378	0	5.77378	0	0	7.57217	7.83526		325.138	289.165	289.165	272.469	272.469	272.469	272.469	267.269	251.121	251.121	251.121	251.121		289.165	0	0	0	BioE_COM-S & BioE_COM-M & BioE_COM-L	0	272.469	16.6958	5.77378
IT	ITH3	ITH34	Treviso	0.735655	9	0	5.77378	5.77378	4.95341	5.77378	9.51447	5.77378	9.80873	0	7.57217	7.83526		2302.51	2079.87	2079.87	1959.78	1862.7	1773.32	1767.55	1922.38	1806.23	1716.76	1634.37	1629.06		2079.87	4.95341	9.51447	9.80873	BioE_COM-S	4.95341	1862.7	217.163	10.4412
IT	ITH3	ITH35	Venezia	0	9	0	5.77378	5.77378	21.7116	5.77378	34.7068	5.77378	21.2361	0	7.57217	7.83526		2178.11	1982.08	1982.08	1867.64	1462.14	1219.44	1471.02	1831.99	1721.3	1347.58	1123.89	1355.76		1982.08	21.7116	34.7068	21.2361	BioE_COM-L	21.2361	1471.02	511.055	25.7838
IT	ITH3	ITH36	Padova	0	9	0	5.77378	5.77378	49.0066	5.77378	81.457	5.77378	98.3444	0	7.57217	7.83526		3441.11	3131.41	3131.41	2950.61	1504.61	547.133	48.8511	2894.29	2719.42	1386.72	504.263	45.0235		3131.41	49.0066	81.457	98.3444	BioE_COM-S	49.0066	1504.61	1626.79	51.9509
IT	ITH3	ITH37	Rovigo	0	9	0	5.77378	2.17391	78.0822	2.17391	100	2.17391	71.2329	0	7.57217	7.83526		5710.7	5196.73	5196.73	4896.69	1114.25	0	1462.45	4803.23	4513.02	1026.94	0	1347.86		5196.73	78.0822	100	71.2329	BioE_COM-L	71.2329	1462.45	3734.28	71.8582
IT	ITH4	ITH41	Pordenone	0	9	0	2.17391	2.17391	23.3161	2.17391	47.7979	2.17391	90.285	0	8.69565	8.51852		2648.27	2409.93	2409.93	2357.54	1807.85	1230.68	229.035	2200.37	2156.71	1653.85	1125.85	209.525		2409.93	23.3161	47.7979	90.285	BioE_COM-S	23.3161	1807.85	602.075	24.9831
IT	ITH4	ITH42	Udine	0	9	0	2.17391	2.17391	21.4286	2.17391	50.8065	2.17391	41.129	0	8.69565	8.51852		3336.73	3036.43	3036.43	2970.42	2333.9	1461.25	1748.71	2772.39	2717.38	2135.09	1336.78	1599.75		3036.43	21.4286	50.8065	41.129	BioE_COM-S	21.4286	2333.9	702.527	23.1366
IT	ITH4	ITH43	Gorizia	0	9	0	2.17391	2.17391	13.089	2.17391	5.2356	2.17391	2.6178	0	8.69565	8.51852		314.784	286.453	286.453	280.226	243.547	265.555	272.89	261.544	256.355	222.801	242.933	249.644		286.453	13.089	5.2356	2.6178	BioE_COM-L	2.6178	272.89	13.563	4.73481
IT	ITH4	ITH44	Trieste	0	9	0	2.17391	2.62607	100	2.62607	100	2.62607	100	0	8.69565	8.51852		27.4358	24.9666	24.9666	24.4238	0	0	0	22.7956	22.3433	0	0	0		24.9666	100	100	100		100	0	24.9666	100
IT	ITH5	ITH51	Piacenza	0	9	0	2.62607	2.62607	2.84974	2.62607	12.9534	2.62607	12.9534	0	5.01047	5.06287		841.524	765.787	765.787	745.677	724.427	649.086	649.086	727.417	707.924	687.75	616.224	616.224		765.787	2.84974	12.9534	12.9534	BioE_COM-S	2.84974	724.427	41.3599	5.40097
IT	ITH5	ITH52	Parma	0	9	0	2.62607	2.62607	100	2.62607	100	2.62607	100	0	5.01047	5.06287		339.755	309.177	309.177	301.058	0	0	0	293.686	285.816	0	0	0		309.177	100	100	100		100	0	309.177	100
IT	ITH5	ITH53	Reggio Nell'Emilia	0	9	0	2.62607	2.62607	100	2.62607	100	2.62607	100	0	5.01047	5.06287		1610	1465.1	1465.1	1426.63	0	0	0	1391.69	1354.4	0	0	0		1465.1	100	100	100		100	0	1465.1	100
IT	ITH5	ITH54	Modena	0	9	0	2.62607	2.62607	13.181	2.62607	18.2777	2.62607	9.84183	0	5.01047	5.06287		23436.8	21327.5	21327.5	20767.4	18030.1	16971.6	18723.5	20258.9	19716	17117.2	16112.4	17775.6		21327.5	13.181	18.2777	9.84183	BioE_COM-L	9.84183	18723.5	2603.97	12.2094
IT	ITH5	ITH55	Bologna	0.214133	9	0	2.62607	2.62607	38.5439	2.62607	47.1092	2.62607	34.9036	0	5.01047	5.06287		22476.3	20409.6	20409.6	19873.6	12213.6	10511.3	12937	19387	18867.5	11595.2	9979.15	12282		20409.6	38.5439	47.1092	34.9036	BioE_COM-L	34.9036	12937	7472.6	36.6131
IT	ITH5	ITH56	Ferrara	0	9	0	2.62607	2.62607	3.08057	2.62607	6.47709	2.62607	3.15956	0	5.01047	5.06287		38736	35249.7	35249.7	34324	33266.7	32100.8	33239.6	33483.5	32586.3	31582.4	30475.6	31556.7		35249.7	3.08057	6.47709	3.15956	BioE_COM-S	3.08057	33266.7	1983.06	5.62574
IT	ITH5	ITH57	Ravenna	0	9	0	2.62607	2.62607	6.81004	2.62607	18.8172	2.62607	18.638	0	5.01047	5.06287		55462.9	50471.2	50471.2	49145.8	45799	39898	39986	47942.4	46657.6	43480.2	37878	37961.6		50471.2	6.81004	18.8172	18.638	BioE_COM-S	6.81004	45799	4672.26	9.25727
IT	ITH5	ITH58	Forli-Cesena	0	9	0	2.62607	2.62607	38.5542	2.62607	100	2.62607	88.5542	0	5.01047	5.06287		26163.9	23809.2	23809.2	23183.9	14245.6	0	2653.58	22616.2	22010.2	13524.3	0	2519.24		23809.2	38.5542	100	88.5542	BioE_COM-S	38.5542	14245.6	9563.63	40.1678
IT	ITH5	ITH59	Rimini	0	9	0	2.62607	8.94737	36.7925	8.94737	99.5283	8.94737	100	0	5.01047	5.06287		1503.88	1368.53	1368.53	1332.59	787.617	5.87774	0	1299.96	1265.12	747.741	5.58016	0		1368.53	36.7925	99.5283	100	BioE_COM-S	36.7925	787.617	580.911	42.4479
IT	ITI1	ITI11	Massa-Carrara	1.86667	9	0	8.94737	8.94737	55.4667	8.94737	100	8.94737	100	0	36.8421	40.1734		217.351	194.097	194.097	176.731	78.704	0	0	122.588	105.732	47.0859	0	0		194.097	55.4667	100	100	BioE_COM-S	55.4667	78.704	115.393	59.4512
IT	ITI1	ITI12	Lucca	3.3867	9	0	8.94737	8.94737	13.8547	8.94737	42.5493	8.94737	35.0369	0	36.8421	40.1734		572.775	503.573	503.573	458.516	394.99	263.421	297.866	318.046	274.315	236.309	157.596	178.203		503.573	13.8547	42.5493	35.0369	BioE_COM-S	13.8547	394.99	108.583	21.5624
IT	ITI1	ITI13	Pistoia	0.155925	9	0	8.94737	8.94737	1.8711	8.94737	8.62786	8.94737	0	0	36.8421	40.1734		445.452	404.729	404.729	368.517	361.622	336.722	368.517	255.619	220.471	216.346	201.449	220.471		404.729	1.8711	8.62786	0	BioE_COM-L	0	368.517	36.2126	8.94737
IT	ITI1	ITI14	Firenze	0.197444	9	0	8.94737	8.94737	2.29658	8.94737	3.54359	8.94737	0.436454	0	36.8421	40.1734		1324.15	1202.6	1202.6	1095	1069.85	1056.19	1090.22	759.535	655.099	640.054	631.885	652.24		1202.6	2.29658	3.54359	0.436454	BioE_COM-L	0.436454	1090.22	112.38	9.34477
IT	ITI1	ITI15	Prato	1.63043	9	0	8.94737	8.94737	6.7029	8.94737	35.5072	8.94737	3.07971	0	36.8421	40.1734		52.9688	47.4157	47.4157	43.1733	40.2794	27.8436	41.8436	29.9468	25.8291	24.0978	16.6579	25.0336		47.4157	6.7029	35.5072	3.07971	BioE_COM-L	3.07971	41.8436	5.57207	11.7515
IT	ITI1	ITI16	Livorno	0	9	0	8.94737	8.94737	16.4907	8.94737	40.3737	8.94737	41.5922	0	36.8421	40.1734		544.495	495.491	495.491	451.157	376.758	269.008	263.511	312.941	269.912	225.402	160.939	157.65		495.491	16.4907	40.3737	41.5922	BioE_COM-S	16.4907	376.758	118.732	23.9625
IT	ITI1	ITI17	Pisa	1.86567	9	0	8.94737	8.94737	29.9751	8.94737	74.2537	8.94737	68.0348	0	36.8421	40.1734		1286.11	1148.52	1148.52	1045.76	732.292	269.244	334.279	725.382	625.642	438.105	161.079	199.988		1148.52	29.9751	74.2537	68.0348	BioE_COM-S	29.9751	732.292	416.23	36.2405
IT	ITI1	ITI18	Arezzo	0.123039	9	0	8.94737	8.94737	16.2412	8.94737	36.3888	8.94737	3.78345	0	36.8421	40.1734		2636.56	2396.32	2396.32	2181.91	1827.54	1387.94	2099.36	1513.46	1305.36	1093.36	830.357	1255.97		2396.32	16.2412	36.3888	3.78345	BioE_COM-L	3.78345	2099.36	296.959	12.3923
IT	ITI1	ITI19	Siena	0	9	0	8.94737	8.94737	15.7399	8.94737	26.0508	8.94737	16.3748	0	36.8421	40.1734		925.649	842.341	842.341	766.973	646.252	567.171	641.383	532.005	458.854	386.631	339.319	383.718		842.341	15.7399	26.0508	16.3748	BioE_COM-S	15.7399	646.252	196.088	23.279
IT	ITI1	ITI1A	Grosseto	0.0276091	9	0	8.94737	6.52174	38.7631	6.52174	77.7747	6.52174	70.8724	0	36.8421	40.1734		1403.74	1277.05	1277.05	1162.79	731.027	265.319	347.716	806.561	695.659	437.348	158.731	208.026		1277.05	38.7631	77.7747	70.8724	BioE_COM-S	38.7631	731.027	546.028	42.7568
IT	ITI2	ITI21	Perugia	2.20776	9	0	6.52174	6.52174	22.3797	6.52174	61.004	6.52174	41.0411	0	35.8696	38.3721		2218.01	1973.82	1973.82	1845.1	1432.17	719.515	1087.85	1265.82	1137.09	882.616	443.422	670.418		1973.82	22.3797	61.004	41.0411	BioE_COM-S	22.3797	1432.17	541.655	27.4419
IT	ITI2	ITI22	Terni	3.42813	9	0	6.52174	9.43396	21.5037	9.43396	73.5489	9.43396	73.2372	0	35.8696	38.3721		204.585	179.79	179.79	168.065	127.815	43.07	43.5775	115.3	103.575	78.7694	26.5431	26.8559		179.79	21.5037	73.5489	73.2372	BioE_COM-S	21.5037	127.815	51.9755	28.909
IT	ITI3	ITI31	Pesaro E Urbino	0	9	0	9.43396	9.43396	45.5446	9.43396	28.7129	9.43396	39.604	0	17.7358	19.1667		1106.22	1006.66	1006.66	911.689	496.464	649.917	550.624	828.117	736.948	401.308	525.349	445.088		1006.66	45.5446	28.7129	39.604	BioE_COM-M	28.7129	649.917	356.74	35.4381
IT	ITI3	ITI32	Ancona	0	9	0	9.43396	9.43396	55.3779	9.43396	97.3837	9.43396	100	0	17.7358	19.1667		605.059	550.603	550.603	498.66	222.512	13.0463	0	452.949	403.083	179.864	10.5458	0		550.603	55.3779	97.3837	100	BioE_COM-S	55.3779	222.512	328.091	59.5875
IT	ITI3	ITI33	Macerata	0	9	0	9.43396	9.43396	98.7805	9.43396	100	9.43396	100	0	17.7358	19.1667		586.919	534.097	534.097	483.71	5.8989	0	0	439.37	390.999	4.76828	0	0		534.097	98.7805	100	100	BioE_COM-S	98.7805	5.8989	528.198	98.8955
IT	ITI3	ITI34	Ascoli Piceno	0	9	0	9.43396	9.43396	32.1311	9.43396	82.2951	9.43396	100	0	17.7358	19.1667		2312.92	2104.76	2104.76	1906.19	1293.71	337.49	0	1731.46	1540.84	1045.75	272.804	0		2104.76	32.1311	82.2951	100	BioE_COM-S	32.1311	1293.71	811.044	38.5339
IT	ITI3	ITI35	Fermo	0	9	0	9.43396	10.9957	92.9204	10.9957	100	10.9957	100	0	17.7358	19.1667		2556.39	2326.32	2326.32	2106.86	146.586	0	0	1913.73	1703.04	118.49	0	0		2326.32	92.9204	100	100	BioE_COM-S	92.9204	146.586	2179.73	93.6988
IT	ITI4	ITI41	Viterbo	0.0556607	9	0	10.9957	10.9957	12.2899	10.9957	29.3777	10.9957	24.346	0	49.0043	54.6693		1999.32	1818.37	1818.37	1618.43	1419.52	1142.97	1224.4	927.289	733.644	643.48	518.116	555.031		1818.37	12.2899	29.3777	24.346	BioE_COM-S	12.2899	1419.52	398.844	21.9342
IT	ITI4	ITI42	Rieti	1.23888	9	0	10.9957	10.9957	4.82846	10.9957	14.2948	10.9957	7.56036	0	49.0043	54.6693		819.707	736.692	736.692	655.688	624.028	561.958	606.115	375.681	297.228	282.877	254.74	274.757		736.692	4.82846	14.2948	7.56036	BioE_COM-S	4.82846	624.028	112.664	15.2932
IT	ITI4	ITI43	Roma	0.882453	9	0	10.9957	10.9957	12.2299	10.9957	16.6761	10.9957	8.72271	0	49.0043	54.6693		8537.07	7700.18	7700.18	6853.49	6015.32	5710.6	6255.68	3926.76	3106.74	2726.79	2588.66	2835.75		7700.18	12.2299	16.6761	8.72271	BioE_COM-L	8.72271	6255.68	1444.5	18.7593
IT	ITI4	ITI44	Latina	6.30022	9	0	10.9957	10.9957	13.9701	10.9957	53.0497	10.9957	49.0504	0	49.0043	54.6693		16992	14488.5	14488.5	12895.4	11093.9	6054.44	6570.17	7388.53	5845.59	5028.96	2744.52	2978.31		14488.5	13.9701	53.0497	49.0504	BioE_COM-S	13.9701	11093.9	3394.61	23.4296
IT	ITI4	ITI45	Frosinone	10.0224	9	0	10.9957	8.80121	28.8955	8.80121	78.6338	8.80121	83.7946	0	49.0043	54.6693		402.938	329.924	329.924	293.647	213.944	64.2882	48.76	168.247	133.112	96.9824	29.1423	22.1033		329.924	28.8955	78.6338	83.7946	BioE_COM-S	28.8955	213.944	115.98	35.1536
LT	LT00	LT001	Alytaus apskritis	0	9	0	8.80121	8.80121	100	8.80121	100	8.80121	100	4	41.047	44.8419		1768.29	1609.14	1609.14	1467.52	0	0	0	910.69	777.075	0	0	0		1609.14	100	100	100		100	0	1609.14	100
LT	LT00	LT002	Kauno apskritis	0	9	0	8.80121	8.80121	21.3675	8.80121	100	8.80121	100	4	41.047	44.8419		3412.88	3105.72	3105.72	2832.38	2227.17	0	0	1757.68	1499.79	1179.33	0	0		3105.72	21.3675	100	100	BioE_COM-S	21.3675	2227.17	878.55	28.2881
LT	LT00	LT003	Klaipedos apskritis	0	9	0	8.80121	8.80121	100	8.80121	100	8.80121	100	4	41.047	44.8419		1156.99	1052.86	1052.86	960.194	0	0	0	595.864	508.44	0	0	0		1052.86	100	100	100		100	0	1052.86	100
LT	LT00	LT004	Marijampoles apskritis	0	9	0	8.80121	8.80121	29.6875	8.80121	100	8.80121	100	4	41.047	44.8419		1803.48	1641.17	1641.17	1496.73	1052.39	0	0	928.818	792.544	557.257	0	0		1641.17	29.6875	100	100	BioE_COM-S	29.6875	1052.39	588.784	35.8759
LT	LT00	LT005	Panevezio apskritis	0	9	0	8.80121	8.80121	11.7424	8.80121	100	8.80121	100	4	41.047	44.8419		3229.38	2938.74	2938.74	2680.09	2365.38	0	0	1663.17	1419.16	1252.51	0	0		2938.74	11.7424	100	100	BioE_COM-S	11.7424	2365.38	573.352	19.5102
LT	LT00	LT006	Siauliu apskritis	0	9	0	8.80121	8.80121	40.9742	8.80121	100	8.80121	100	4	41.047	44.8419		1572.78	1431.23	1431.23	1305.27	770.444	0	0	810.004	691.162	407.964	0	0		1431.23	40.9742	100	100	BioE_COM-S	40.9742	770.444	660.789	46.1692
LT	LT00	LT007	Taurages apskritis	0	9	0	8.80121	8.80121	29.1667	8.80121	100	8.80121	100	4	41.047	44.8419		1278.27	1163.22	1163.22	1060.84	751.431	0	0	658.323	561.735	397.896	0	0		1163.22	29.1667	100	100	BioE_COM-S	29.1667	751.431	411.79	35.4009
LT	LT00	LT008	Telsiu apskritis	0	9	0	8.80121	8.80121	100	8.80121	100	8.80121	100	4	41.047	44.8419		1219.79	1110.01	1110.01	1012.31	0	0	0	628.208	536.038	0	0	0		1110.01	100	100	100		100	0	1110.01	100
LT	LT00	LT009	Utenos apskritis	0	9	0	8.80121	8.80121	53.0864	8.80121	100	8.80121	100	4	41.047	44.8419		2477.88	2254.87	2254.87	2056.41	964.737	0	0	1276.14	1088.91	510.845	0	0		2254.87	53.0864	100	100	BioE_COM-S	53.0864	964.737	1290.13	57.2154
LT	LT00	LT00A	Vilniaus apskritis	0	9	0	8.80121	0	98.9796	0	100	0	100	4	41.047	44.8419		2730.65	2484.89	2484.89	2266.19	25.356	0	0	1406.32	1199.99	13.4265	0	0		2484.89	100	100	100	BioE_COM-S	98.9796	25.356	2459.53	98.9796
LU	LU00	LU000	Luxembourg	0	9	0	0	0.622084	100	0.622084	100	0.622084	100	1	23.0769	23.0769		207.594	188.911	188.911	188.911	0	0	0	143.863	143.863	0	0	0		188.911	100	100	100		100	0	188.911	100
LV	LV00	LV003	Kurzeme	0	9	0	0.622084	0.622084	100	0.622084	100	0.622084	100	4	10.2644	10.3286		2271.68	2067.23	2067.23	2054.37	0	0	0	1780.84	1768.49	0	0	0		2067.23	100	100	100		100	0	2067.23	100
LV	LV00	LV005	Latgale	0	9	0	0.622084	0.622084	100	0.622084	100	0.622084	100	4	10.2644	10.3286		1995.88	1816.25	1816.25	1804.95	0	0	0	1564.63	1553.78	0	0	0		1816.25	100	100	100		100	0	1816.25	100
LV	LV00	LV006	Riga	0	9	0	0.622084	0	0	0	0	0	0	4	10.2644	10.3286		0	0	0	0	0	0	0	0	0	0	0	0		0	100	100	100		0	0	0	0
LV	LV00	LV007	Pieriga	0	9	0	0.622084	0.622084	37.6471	0.622084	100	0.622084	100	4	10.2644	10.3286		1681.91	1530.54	1530.54	1521.02	948.4	0	0	1318.5	1309.36	816.425	0	0		1530.54	37.6471	100	100	BioE_COM-S	37.6471	948.4	582.14	38.0349
LV	LV00	LV008	Vidzeme	0	9	0	0.622084	0.622084	100	0.622084	100	0.622084	100	4	10.2644	10.3286		1245	1132.95	1132.95	1125.9	0	0	0	975.993	969.227	0	0	0		1132.95	100	100	100		100	0	1132.95	100
LV	LV00	LV009	Zemgale	0	9	0	0.622084	43.2432	66.2687	43.2432	100	43.2432	100	4	10.2644	10.3286		2499.18	2274.26	2274.26	2260.11	435.402	0	0	1959.19	1945.6	374.814	0	0		2274.26	66.2687	100	100	BioE_COM-S	66.2687	435.402	1838.85	80.8552
MT	MT00	MT001	Malta	0	9	0	43.2432	43.2432	100	43.2432	100	43.2432	100	0	0	0		849.574	773.113	773.113	438.794	0	0	0	773.113	438.794	0	0	0		773.113	100	100	100		100	0	773.113	100
MT	MT00	MT002	Gozo and Comino / Ghawdex u Kemmuna	0	9	0	43.2432	0	0	0	0	0	0	0	0	0		102.32	93.1108	93.1108	52.8467	93.1108	93.1108	93.1108	93.1108	52.8467	93.1108	93.1108	93.1108		93.1108	100	100	100	BioE_COM-S & BioE_COM-M & BioE_COM-L	0	93.1108	0	0
NL	NL11	NL111	Oost-Groningen	0	9	0	0	0	0	0	0	0	0	1	0	0		0	0	0	0	0	0	0	0	0	0	0	0		0	100	100	100		0	0	0	0
NL	NL11	NL112	Delfzijl en Omgeving	0	9	0	0	0	0	0	0	0	0	1	0	0		0	0	0	0	0	0	0	0	0	0	0	0		0	100	100	100		0	0	0	0
NL	NL11	NL113	Overig Groningen	0	9	0	0	0	0	0	0	0	0	1	0	0		61.5069	55.9713	55.9713	55.9713	55.9713	55.9713	55.9713	55.4116	55.4116	55.4116	55.4116	55.4116		55.9713	100	100	100	BioE_COM-S & BioE_COM-M & BioE_COM-L	0	55.9713	0	0
NL	NL12	NL121	Noord-Friesland	0	9	0	0	0	100	0	100	0	100	1	0	0		75.2346	68.4635	68.4635	68.4635	0	0	0	67.7788	67.7788	0	0	0		68.4635	100	100	100		100	0	68.4635	100
NL	NL12	NL122	Zuidwest-Friesland	0	9	0	0	0	0	0	0	0	0	1	0	0		0	0	0	0	0	0	0	0	0	0	0	0		0	100	100	100		0	0	0	0
NL	NL12	NL123	Zuidoost-Friesland	0	9	0	0	0	0	0	0	0	0	1	0	0		0	0	0	0	0	0	0	0	0	0	0	0		0	100	100	100		0	0	0	0
NL	NL13	NL131	Noord-Drenthe	0	9	0	0	0	0	0	0	0	0	1	0	0		0	0	0	0	0	0	0	0	0	0	0	0		0	100	100	100		0	0	0	0
NL	NL13	NL132	Zuidoost-Drenthe	0	9	0	0	0	0	0	0	0	0	1	0	0		0	0	0	0	0	0	0	0	0	0	0	0		0	100	100	100		0	0	0	0
NL	NL13	NL133	Zuidwest-Drenthe	0	9	0	0	0	0	0	0	0	0	1	0	0		15.1589	13.7946	13.7946	13.7946	13.7946	13.7946	13.7946	13.6566	13.6566	13.6566	13.6566	13.6566		13.7946	100	100	100	BioE_COM-S & BioE_COM-M & BioE_COM-L	0	13.7946	0	0
NL	NL21	NL211	Noord-Overijssel	0	9	0	0	0	0	0	0	0	0	1	0	0		30.6873	27.9254	27.9254	27.9254	27.9254	27.9254	27.9254	27.6462	27.6462	27.6462	27.6462	27.6462		27.9254	100	100	100	BioE_COM-S & BioE_COM-M & BioE_COM-L	0	27.9254	0	0
NL	NL21	NL212	Zuidwest-Overijssel	0	9	0	0	0	0	0	0	0	0	1	0	0		61.2819	55.7665	55.7665	55.7665	55.7665	55.7665	55.7665	55.2088	55.2088	55.2088	55.2088	55.2088		55.7665	100	100	100	BioE_COM-S & BioE_COM-M & BioE_COM-L	0	55.7665	0	0
NL	NL21	NL213	Twente	0	9	0	0	2.57937	0	2.57937	0	2.57937	0	1	0	0		15.4567	14.0656	14.0656	14.0656	13.7028	13.7028	13.7028	13.925	13.925	13.5658	13.5658	13.5658		14.0656	0	0	0	BioE_COM-S & BioE_COM-M & BioE_COM-L	0	13.7028	0.362803	2.57937
NL	NL22	NL221	Veluwe	0	9	0	2.57937	2.57937	100	2.57937	100	2.57937	100	1	1.19048	1.222		123.415	112.307	112.307	109.411	0	0	0	109.861	106.993	0	0	0		112.307	100	100	100		100	0	112.307	100
NL	NL22	NL224	Zuidwest-Gelderland	0	9	0	2.57937	2.57937	55.2381	2.57937	100	2.57937	100	1	1.19048	1.222		6323.02	5753.95	5753.95	5605.54	2509.14	0	0	5628.6	5481.67	2453.7	0	0		5753.95	55.2381	100	100	BioE_COM-S	55.2381	2509.14	3244.81	56.3927
NL	NL22	NL225	Achterhoek	0	9	0	2.57937	2.57937	0	2.57937	0	2.57937	0	1	1.19048	1.222		32.4436	29.5237	29.5237	28.7622	28.7622	28.7622	28.7622	28.8805	28.1266	28.1266	28.1266	28.1266		29.5237	0	0	0	BioE_COM-S & BioE_COM-M & BioE_COM-L	0	28.7622	0.761524	2.57937
NL	NL22	NL226	Arnhem/Nijmegen	0	9	0	2.57937	0	29.9611	0	49.4163	0	100	1	1.19048	1.222		1689.11	1537.09	1537.09	1497.45	1076.56	777.518	0	1503.61	1464.36	1052.77	760.337	0		1537.09	100	100	100	BioE_COM-S	29.9611	1076.56	460.53	29.9611
NL	NL23	NL230	Flevoland	0	9	0	0	1.59574	69.4184	1.59574	100	1.59574	100	1	6.38298	6.38298		2165.85	1970.92	1970.92	1970.92	593.121	0	0	1826.66	1826.66	549.709	0	0		1970.92	69.4184	100	100	BioE_COM-S	69.4184	593.121	1377.8	69.9064
NL	NL31	NL310	Utrecht	0	9	0	1.59574	1.17647	18.9189	1.17647	100	1.17647	100	1	1.59574	1.62162		3020.68	2748.82	2748.82	2704.95	2202.55	0	0	2677.9	2634.48	2145.17	0	0		2748.82	18.9189	100	100	BioE_COM-S	18.9189	2202.55	546.268	19.8728
NL	NL32	NL321	Kop Van Noord-Holland	0	9	0	1.17647	1.17647	14.1176	1.17647	100	1.17647	100	1	2.35294	2.38095		1171.56	1066.12	1066.12	1053.58	904.838	0	0	1030.63	1018.21	874.462	0	0		1066.12	14.1176	100	100	BioE_COM-S	14.1176	904.838	161.283	15.128
NL	NL32	NL322	Alkmaar en Omgeving	0	9	0	1.17647	1.17647	0	1.17647	0	1.17647	0	1	2.35294	2.38095		0	0	0	0	0	0	0	0	0	0	0	0		0	0	0	0		0	0	0	0
NL	NL32	NL323	Ijmond	0	9	0	1.17647	1.17647	0	1.17647	0	1.17647	0	1	2.35294	2.38095		0	0	0	0	0	0	0	0	0	0	0	0		0	0	0	0		0	0	0	0
NL	NL32	NL324	Agglomeratie Haarlem	0	9	0	1.17647	1.17647	0	1.17647	0	1.17647	0	1	2.35294	2.38095		0	0	0	0	0	0	0	0	0	0	0	0		0	0	0	0		0	0	0	0
NL	NL32	NL325	Zaanstreek	0	9	0	1.17647	1.17647	0	1.17647	0	1.17647	0	1	2.35294	2.38095		0	0	0	0	0	0	0	0	0	0	0	0		0	0	0	0		0	0	0	0
NL	NL32	NL326	Groot-Amsterdam	0	9	0	1.17647	1.17647	0	1.17647	0	1.17647	0	1	2.35294	2.38095		139.814	127.231	127.231	125.734	125.734	125.734	125.734	122.995	121.513	121.513	121.513	121.513		127.231	0	0	0	BioE_COM-S & BioE_COM-M & BioE_COM-L	0	125.734	1.49684	1.17647
NL	NL32	NL327	Het Gooi en Vechtstreek	0	9	0	1.17647	1.9802	0	1.9802	0	1.9802	0	1	2.35294	2.38095		0	0	0	0	0	0	0	0	0	0	0	0		0	0	0	0		0	0	0	0
NL	NL33	NL332	Agglomeratie 's-Gravenhage	0	9	0	1.9802	1.9802	0	1.9802	0	1.9802	0	1	0	0		0	0	0	0	0	0	0	0	0	0	0	0		0	0	0	0		0	0	0	0
NL	NL33	NL333	Delft en Westland	0	9	0	1.9802	1.9802	0	1.9802	0	1.9802	0	1	0	0		0	0	0	0	0	0	0	0	0	0	0	0		0	0	0	0		0	0	0	0
NL	NL33	NL337	Agglomeratie Leiden en Bollenstreek	0	9	0	1.9802	1.9802	0	1.9802	0	1.9802	0	1	0	0		0	0	0	0	0	0	0	0	0	0	0	0		0	0	0	0		0	0	0	0
NL	NL33	NL338	Oost-Zuid-Holland	0	9	0	1.9802	1.9802	0	1.9802	0	1.9802	0	1	0	0		0	0	0	0	0	0	0	0	0	0	0	0		0	0	0	0		0	0	0	0
NL	NL33	NL339	Groot-Rijnmond	0	9	0	1.9802	1.9802	0	1.9802	100	1.9802	100	1	0	0		860.413	782.975	782.975	767.471	767.471	0	0	775.146	759.796	759.796	0	0		782.975	0	100	100	BioE_COM-S	0	767.471	15.5045	1.9802
NL	NL33	NL33A	Zuidoost-Zuid-Holland	0	9	0	1.9802	0.753769	100	0.753769	100	0.753769	100	1	0	0		727.218	661.769	661.769	648.664	0	0	0	655.151	642.178	0	0	0		661.769	100	100	100		100	0	661.769	100
NL	NL34	NL341	Zeeuwsch-Vlaanderen	0	9	0	0.753769	0.753769	100	0.753769	100	0.753769	100	1	0	0		1300.4	1183.36	1183.36	1174.44	0	0	0	1171.53	1162.7	0	0	0		1183.36	100	100	100		100	0	1183.36	100
NL	NL34	NL342	Overig Zeeland	0	9	0	0.753769	0.78125	44.4882	0.78125	100	0.78125	100	1	0	0		6503.47	5918.16	5918.16	5873.55	3259.61	0	0	5858.98	5814.81	3227.01	0	0		5918.16	44.4882	100	100	BioE_COM-S	44.4882	3259.61	2658.55	44.9219
NL	NL41	NL411	West-Noord-Brabant	0	9	0	0.78125	0.78125	100	0.78125	100	0.78125	100	1	3.90625	3.93701		1254.84	1141.9	1141.9	1132.98	0	0	0	1086.32	1077.49	0	0	0		1141.9	100	100	100		100	0	1141.9	100
NL	NL41	NL412	Midden-Noord-Brabant	0	9	0	0.78125	0.78125	100	0.78125	100	0.78125	100	1	3.90625	3.93701		580.449	528.209	528.209	524.082	0	0	0	502.5	498.415	0	0	0		528.209	100	100	100		100	0	528.209	100
NL	NL41	NL413	Noordoost-Noord-Brabant	0	9	0	0.78125	0.78125	0	0.78125	0	0.78125	0	1	3.90625	3.93701		322.417	293.399	293.399	291.107	291.107	291.107	291.107	279.119	276.85	276.85	276.85	276.85		293.399	0	0	0	BioE_COM-S & BioE_COM-M & BioE_COM-L	0	291.107	2.29218	0.78125
NL	NL41	NL414	Zuidoost-Noord-Brabant	0	9	0	0.78125	0.97561	100	0.97561	100	0.97561	100	1	3.90625	3.93701		134.339	122.248	122.248	121.293	0	0	0	116.298	115.353	0	0	0		122.248	100	100	100		100	0	122.248	100
NL	NL42	NL421	Noord-Limburg	0	9	0	0.97561	0.97561	100	0.97561	100	0.97561	100	1	1.46341	1.47783		950.993	865.404	865.404	856.961	0	0	0	844.212	835.853	0	0	0		865.404	100	100	100		100	0	865.404	100
NL	NL42	NL422	Midden-Limburg	0	9	0	0.97561	0.97561	0	0.97561	0	0.97561	0	1	1.46341	1.47783		634.615	577.5	577.5	571.866	571.866	571.866	571.866	563.358	557.78	557.78	557.78	557.78		577.5	0	0	0	BioE_COM-S & BioE_COM-M & BioE_COM-L	0	571.866	5.63414	0.97561
NL	NL42	NL423	Zuid-Limburg	0	9	0	0.97561	3.61272	0	3.61272	100	3.61272	100	1	1.46341	1.47783		2632.22	2395.32	2395.32	2371.95	2308.78	0	0	2336.66	2313.53	2251.92	0	0		2395.32	0	100	100	BioE_COM-S	0	2308.78	86.5362	3.61272
PL	PL11	PL113	Miasto Lodz	0	9	0	3.61272	3.61272	0	3.61272	0	3.61272	0	4	5.09393	5.24738		97.5175	88.7409	88.7409	85.5349	85.5349	85.5349	85.5349	80.8517	77.8047	77.8047	77.8047	77.8047		88.7409	0	0	0	BioE_COM-S & BioE_COM-M & BioE_COM-L	0	85.5349	3.20596	3.61272
PL	PL11	PL114	Lodzki	0	9	0	3.61272	3.61272	22.8571	3.61272	22.8571	3.61272	100	4	5.09393	5.24738		6160.89	5606.41	5606.41	5403.86	4168.7	4168.7	0	5107.99	4915.49	3791.95	3791.95	0		5606.41	22.8571	22.8571	100	BioE_COM-S & BioE_COM-M	22.8571	4168.7	1437.71	25.6441
PL	PL11	PL115	Piotrkowski	0	9	0	3.61272	3.61272	66	3.61272	100	3.61272	100	4	5.09393	5.24738		4118.78	3748.09	3748.09	3612.68	1228.31	0	0	3414.88	3286.19	1117.3	0	0		3748.09	66	100	100	BioE_COM-S	66	1228.31	2519.78	67.2283
PL	PL11	PL116	Sieradzki	0	9	0	3.61272	3.61272	100	3.61272	100	3.61272	100	4	5.09393	5.24738		3388.06	3083.14	3083.14	2971.75	0	0	0	2809.04	2703.18	0	0	0		3083.14	100	100	100		100	0	3083.14	100
PL	PL11	PL117	Skierniewicki	0	9	0	3.61272	4.04858	1.83024	4.04858	4.32361	4.04858	8.54111	4	5.09393	5.24738		54999.8	50049.8	50049.8	48241.7	47144.6	45947.2	43921.8	45600.3	43881.9	42883.9	41794.7	39952.4		50049.8	1.83024	4.32361	8.54111	BioE_COM-S	1.83024	47144.6	2905.26	5.80472
PL	PL12	PL127	Miasto Warszawa	0	9	0	4.04858	4.04858	100	4.04858	100	4.04858	100	4	3.63216	3.77336		225.957	205.62	205.62	197.296	0	0	0	190.226	182.257	0	0	0		205.62	100	100	100		100	0	205.62	100
PL	PL12	PL128	Radomski	0	9	0	4.04858	4.04858	5.68655	4.04858	33.7725	4.04858	33.0791	4	3.63216	3.77336		32714.5	29770.2	29770.2	28564.9	26940.6	18917.8	19115.9	27541.4	26387.6	24887.1	17475.8	17658.8		29770.2	5.68655	33.7725	33.0791	BioE_COM-S	5.68655	26940.6	2829.63	9.5049
PL	PL12	PL129	Warszawski wschodni	0	9	0	4.04858	4.04858	9.56211	4.04858	15.1028	4.04858	15.1028	4	3.63216	3.77336		12464.3	11342.5	11342.5	10883.3	9842.62	9239.62	9239.62	10493.3	10053.7	9092.38	8535.34	8535.34		11342.5	9.56211	15.1028	15.1028	BioE_COM-S	9.56211	9842.62	1499.88	13.2236
PL	PL12	PL12A	Warszawski zachodni	0	9	0	4.04858	15.9615	1.401	15.9615	1.70122	15.9615	1.46533	4	3.63216	3.77336		151116	137516	137516	131948	113947	113600	113873	127220	121891	105262	104941	105193		137516	1.401	1.70122	1.46533	BioE_COM-S	1.401	113947	23568.7	17.1389
PL	PL12	PL12B	Ciechanowski	0	9	0	4.04858	4.04858	100	4.04858	100	4.04858	100	4	3.63216	3.77336		3627.39	3300.92	3300.92	3167.28	0	0	0	3053.79	2925.86	0	0	0		3300.92	100	100	100		100	0	3300.92	100
PL	PL12	PL12C	Plocki	0	9	0	4.04858	4.04858	100	4.04858	100	4.04858	100	4	3.63216	3.77336		3653.29	3324.49	3324.49	3189.9	0	0	0	3075.59	2946.75	0	0	0		3324.49	100	100	100		100	0	3324.49	100
PL	PL12	PL12D	Ostrolecki	0	9	0	4.04858	4.04858	100	4.04858	100	4.04858	100	4	3.63216	3.77336		3727.35	3391.88	3391.88	3254.56	0	0	0	3137.94	3006.48	0	0	0		3391.88	100	100	100		100	0	3391.88	100
PL	PL12	PL12E	Siedlecki	0	9	0	4.04858	15.9615	43.2558	15.9615	100	15.9615	100	4	3.63216	3.77336		3603.48	3279.16	3279.16	3146.4	1563.73	0	0	3033.66	2906.57	1444.54	0	0		3279.16	43.2558	100	100	BioE_COM-S	43.2558	1563.73	1715.43	52.3131
PL	PL21	PL213	Miasto Krakow	0	9	0	15.9615	15.9615	0	15.9615	0	15.9615	0	4	13.8462	16.1327		569.549	518.289	518.289	435.562	435.562	435.562	435.562	428.665	350.683	350.683	350.683	350.683		518.289	0	0	0	BioE_COM-S & BioE_COM-M & BioE_COM-L	0	435.562	82.7269	15.9615
PL	PL21	PL214	Krakowski	0	9	0	15.9615	15.9615	44.4444	15.9615	72.2222	15.9615	100	4	13.8462	16.1327		5991.45	5452.22	5452.22	4581.96	2545.53	1272.77	0	4509.4	3689.06	2049.48	1024.74	0		5452.22	44.4444	72.2222	100	BioE_COM-S	44.4444	2545.53	2906.69	53.312
PL	PL21	PL217	Tarnowski	0	9	0	15.9615	18.8571	0	18.8571	0	18.8571	0	4	13.8462	16.1327		3024.56	2752.35	2752.35	2313.03	2233.33	2233.33	2233.33	2276.4	1862.28	1798.11	1798.11	1798.11		2752.35	0	0	0	BioE_COM-S & BioE_COM-M & BioE_COM-L	0	2233.33	519.014	18.8571
PL	PL21	PL218	Nowosadecki	0	9	0	15.9615	15.9615	11.7002	15.9615	56.4899	15.9615	100	4	13.8462	16.1327		4026.58	3664.19	3664.19	3079.33	2719.04	1339.82	0	3030.57	2479.25	2189.17	1078.72	0		3664.19	11.7002	56.4899	100	BioE_COM-S	11.7002	2719.04	945.149	25.7942
PL	PL21	PL219	Nowotarski	0	9	0	15.9615	15.9615	0	15.9615	0	15.9615	0	4	13.8462	16.1327		3196.39	2908.71	2908.71	2444.44	2444.44	2444.44	2444.44	2405.73	1968.08	1968.08	1968.08	1968.08		2908.71	0	0	0	BioE_COM-S & BioE_COM-M & BioE_COM-L	0	2444.44	464.275	15.9615
PL	PL21	PL21A	Oswiecimski	0	9	0	15.9615	1.66016	0	1.66016	0	1.66016	0	4	13.8462	16.1327		4300.91	3913.83	3913.83	3289.12	3848.85	3848.85	3848.85	3237.03	2648.15	3098.81	3098.81	3098.81		3913.83	0	0	0	BioE_COM-S & BioE_COM-M & BioE_COM-L	0	3848.85	64.9756	1.66016
PL	PL22	PL224	Czestochowski	0	9	0	18.8571	18.8571	100	18.8571	100	18.8571	100	4	6.85714	8.4507		1262.14	1148.55	1148.55	931.966	0	0	0	1027	819.08	0	0	0		1148.55	100	100	100		100	0	1148.55	100
PL	PL22	PL225	Bielski	0	9	0	18.8571	18.8571	100	18.8571	100	18.8571	100	4	6.85714	8.4507		629.642	572.974	572.974	464.928	0	0	0	512.337	408.612	0	0	0		572.974	100	100	100		100	0	572.974	100
PL	PL22	PL227	Rybnicki	0	9	0	18.8571	18.8571	0	18.8571	0	18.8571	0	4	6.85714	8.4507		278.053	253.029	253.029	205.315	205.315	205.315	205.315	226.251	180.446	180.446	180.446	180.446		253.029	0	0	0	BioE_COM-S & BioE_COM-M & BioE_COM-L	0	205.315	47.714	18.8571
PL	PL22	PL228	Bytomski	0	9	0	18.8571	18.8571	0	18.8571	100	18.8571	100	4	6.85714	8.4507		560.553	510.103	510.103	413.912	413.912	0	0	456.12	363.776	363.776	0	0		510.103	0	100	100	BioE_COM-S	0	413.912	96.1909	18.8571
PL	PL22	PL229	Gliwicki	0	9	0	18.8571	18.8571	0	18.8571	0	18.8571	0	4	6.85714	8.4507		91.146	82.9428	82.9428	67.3022	67.3022	67.3022	67.3022	74.1651	59.1501	59.1501	59.1501	59.1501		82.9428	0	0	0	BioE_COM-S & BioE_COM-M & BioE_COM-L	0	67.3022	15.6407	18.8571
PL	PL22	PL22A	Katowicki	0	9	0	18.8571	18.8571	0	18.8571	0	18.8571	0	4	6.85714	8.4507		21.449	19.5185	19.5185	15.8379	15.8379	15.8379	15.8379	17.4529	13.9195	13.9195	13.9195	13.9195		19.5185	0	0	0	BioE_COM-S & BioE_COM-M & BioE_COM-L	0	15.8379	3.68064	18.8571
PL	PL22	PL22B	Sosnowiecki	0	9	0	18.8571	18.8571	0	18.8571	0	18.8571	0	4	6.85714	8.4507		653.988	595.129	595.129	482.905	482.905	482.905	482.905	532.148	424.412	424.412	424.412	424.412		595.129	0	0	0	BioE_COM-S & BioE_COM-M & BioE_COM-L	0	482.905	112.224	18.8571
PL	PL22	PL22C	Tyski	0	9	0	18.8571	6.3244	100	6.3244	100	6.3244	100	4	6.85714	8.4507		137.19	124.843	124.843	101.301	0	0	0	111.631	89.0306	0	0	0		124.843	100	100	100		100	0	124.843	100
PL	PL31	PL311	Bialski	0	9	0	6.3244	6.3244	16.6052	6.3244	35.0554	6.3244	100	4	20.1265	21.247		8243.3	7501.41	7501.41	7026.99	5860.15	4563.65	0	5751.97	5312.6	4430.44	3450.25	0		7501.41	16.6052	35.0554	100	BioE_COM-S	16.6052	5860.15	1641.26	21.8794
PL	PL31	PL312	Chelmsko-zamojski	0	9	0	6.3244	6.3244	38.9381	6.3244	100	6.3244	100	4	20.1265	21.247		7552.92	6873.16	6873.16	6438.47	3931.46	0	0	5270.24	4867.67	2972.29	0	0		6873.16	38.9381	100	100	BioE_COM-S	38.9381	3931.46	2941.7	42.7999
PL	PL31	PL314	Lubelski	0	9	0	6.3244	6.3244	45.6954	6.3244	100	6.3244	100	4	20.1265	21.247		8960.33	8153.9	8153.9	7638.21	4147.9	0	0	6252.29	5774.71	3135.93	0	0		8153.9	45.6954	100	100	BioE_COM-S	45.6954	4147.9	4005.99	49.1298
PL	PL31	PL315	Pulawski	0	9	0	6.3244	24.6032	4.17778	24.6032	5.55556	24.6032	3.02222	4	20.1265	21.247		39302	35764.8	35764.8	33502.9	25839	25467.4	26150.6	27423.9	25329.1	19535	19254.1	19770.6		35764.8	4.17778	5.55556	3.02222	BioE_COM-L	3.02222	26150.6	9614.24	26.8818
PL	PL32	PL323	Krosnienski	0	9	0	24.6032	24.6032	100	24.6032	100	24.6032	100	4	49.0079	63.4211		1465.24	1333.37	1333.37	1005.32	0	0	0	652.717	353.026	0	0	0		1333.37	100	100	100		100	0	1333.37	100
PL	PL32	PL324	Przemyski	0	9	0	24.6032	24.6032	16.6667	24.6032	100	24.6032	100	4	49.0079	63.4211		3744.02	3407.06	3407.06	2568.81	2140.68	0	0	1667.84	902.059	751.716	0	0		3407.06	16.6667	100	100	BioE_COM-S	16.6667	2140.68	1266.38	37.1693
PL	PL32	PL325	Rzeszowski	0	9	0	24.6032	24.6032	49.1667	24.6032	100	24.6032	100	4	49.0079	63.4211		3439.77	3130.19	3130.19	2360.06	1199.7	0	0	1532.3	828.755	421.284	0	0		3130.19	49.1667	100	100	BioE_COM-S	49.1667	1199.7	1930.49	61.6733
PL	PL32	PL326	Tarnobrzeski	0	9	0	24.6032	9.10683	77.9412	9.10683	79.4118	9.10683	64.7059	4	49.0079	63.4211		3038.17	2764.74	2764.74	2084.52	554.329	517.374	886.926	1353.41	731.997	194.657	181.68	311.451		2764.74	77.9412	79.4118	64.7059	BioE_COM-L	64.7059	886.926	1877.81	67.9201
PL	PL33	PL331	Kielecki	0	9	0	9.10683	9.10683	100	9.10683	100	9.10683	100	4	4.7986	5.16378		4196.86	3819.14	3819.14	3471.34	0	0	0	3490.44	3160.4	0	0	0		3819.14	100	100	100		100	0	3819.14	100
PL	PL33	PL332	Sandomiersko-jedrzejowski	0	9	0	9.10683	4.80349	2.09548	4.80349	6.04882	4.80349	9.5701	4	4.7986	5.16378		64170.7	58395.3	58395.3	53077.3	54425.4	52227.7	50270.2	53369.4	48323.1	49550.4	47549.6	45767.4		58395.3	2.09548	6.04882	9.5701	BioE_COM-S	2.09548	54425.4	3969.9	6.79832
PL	PL34	PL343	Bialostocki	0	9	0	4.80349	4.80349	28.5714	4.80349	100	4.80349	100	4	67.2489	70.1835		1361.89	1239.32	1239.32	1179.79	842.705	0	0	389.655	337.701	241.215	0	0		1239.32	28.5714	100	100	BioE_COM-S	28.5714	842.705	396.613	32.0025
PL	PL34	PL344	Lomzynski	0	9	0	4.80349	4.80349	96.4286	4.80349	100	4.80349	100	4	67.2489	70.1835		1971.94	1794.47	1794.47	1708.27	61.0097	0	0	564.2	488.973	17.4633	0	0		1794.47	96.4286	100	100	BioE_COM-S	96.4286	61.0097	1733.46	96.6001
PL	PL34	PL345	Suwalski	0	9	0	4.80349	5.17359	0	5.17359	0	5.17359	0	4	67.2489	70.1835		1059.97	964.569	964.569	918.236	914.666	914.666	914.666	303.271	262.834	261.813	261.813	261.813		964.569	0	0	0	BioE_COM-S & BioE_COM-M & BioE_COM-L	0	914.666	49.9028	5.17359
PL	PL41	PL411	Pilski	0	9	0	5.17359	5.17359	0	5.17359	0	5.17359	100	4	27.9101	29.3611		9135.39	8313.21	8313.21	7883.11	7883.11	7883.11	0	5753.26	5345.8	5345.8	5345.8	0		8313.21	0	0	100	BioE_COM-S & BioE_COM-M	0	7883.11	430.091	5.17359
PL	PL41	PL414	Koninski	0	9	0	5.17359	5.17359	0	5.17359	12.9393	5.17359	12.9393	4	27.9101	29.3611		11772	10712.5	10712.5	10158.3	10158.3	8843.89	8843.89	7413.74	6888.69	6888.69	5997.34	5997.34		10712.5	0	12.9393	12.9393	BioE_COM-S	0	10158.3	554.222	5.17359
PL	PL41	PL415	Miasto Poznan	0	9	0	5.17359	5.17359	0	5.17359	0	5.17359	0	4	27.9101	29.3611		590.369	537.236	537.236	509.442	509.442	509.442	509.442	371.801	345.469	345.469	345.469	345.469		537.236	0	0	0	BioE_COM-S & BioE_COM-M & BioE_COM-L	0	509.442	27.7944	5.17359
PL	PL41	PL416	Kaliski	0	9	0	5.17359	5.17359	58.3333	5.17359	100	5.17359	100	4	27.9101	29.3611		3904.3	3552.91	3552.91	3369.1	1403.79	0	0	2458.84	2284.7	951.958	0	0		3552.91	58.3333	100	100	BioE_COM-S	58.3333	1403.79	2149.12	60.489
PL	PL41	PL417	Leszczynski	0	9	0	5.17359	5.17359	12.931	5.17359	37.931	5.17359	100	4	27.9101	29.3611		6087.69	5539.8	5539.8	5253.19	4573.9	3260.6	0	3833.89	3562.37	3101.71	2211.12	0		5539.8	12.931	37.931	100	BioE_COM-S	12.931	4573.9	965.898	17.4356
PL	PL41	PL418	Poznanski	0	9	0	5.17359	1.66016	18.5629	1.66016	70.0599	1.66016	100	4	27.9101	29.3611		5187.23	4720.38	4720.38	4476.17	3780.32	1389.82	0	3266.8	3035.44	2563.56	942.487	0		4720.38	18.5629	70.0599	100	BioE_COM-S	18.5629	3780.32	940.057	19.9149
PL	PL42	PL424	Miasto Szczecin	0	9	0	1.66016	3.43915	0	3.43915	0	3.43915	0	4	100	100		314.279	285.994	285.994	281.246	276.158	276.158	276.158	0	0	0	0	0		285.994	0	0	0	BioE_COM-S & BioE_COM-M & BioE_COM-L	0	276.158	9.83577	3.43915
PL	PL42	PL426	Koszalinski	0	9	0	1.66016	1.66016	0	1.66016	100	1.66016	100	4	100	100		15299.9	13922.9	13922.9	13691.7	13691.7	0	0	0	0	0	0	0		13922.9	0	100	100	BioE_COM-S	0	13691.7	231.141	1.66016
PL	PL42	PL427	Szczecinecko-pyrzycki	0	9	0	1.66016	1.66016	10.3448	1.66016	100	1.66016	100	4	100	100		3361.3	3058.78	3058.78	3008	2696.83	0	0	0	0	0	0	0		3058.78	10.3448	100	100	BioE_COM-S	10.3448	2696.83	361.953	11.8332
PL	PL42	PL428	Szczecinski	4.34783	9	0	1.66016	7.76699	34.7826	7.76699	100	7.76699	100	4	100	100		4193.42	3650.09	3650.09	3589.5	2195.6	0	0	0	0	0	0	0		3650.09	34.7826	100	100	BioE_COM-S	34.7826	2195.6	1454.49	39.848
PL	PL43	PL431	Gorzowski	4.34783	9	0	3.43915	3.43915	30.8725	3.43915	100	3.43915	100	4	100	100		3587.55	3122.73	3122.73	3015.33	2084.42	0	0	0	0	0	0	0		3122.73	30.8725	100	100	BioE_COM-S	30.8725	2084.42	1038.3	33.2499
PL	PL43	PL432	Zielonogorski	4.34783	9	0	3.43915	8.44749	0	8.44749	100	8.44749	100	4	100	100		6037.56	5255.31	5255.31	5074.57	4811.36	0	0	0	0	0	0	0		5255.31	0	100	100	BioE_COM-S	0	4811.36	443.941	8.44749
PL	PL51	PL514	Miasto Wroclaw	4.34783	9	0	8.44749	8.44749	0	8.44749	100	8.44749	100	4	46.5753	50.6234		638.75	555.99	555.99	509.023	509.023	0	0	285.154	241.284	241.284	0	0		555.99	0	100	100	BioE_COM-S	0	509.023	46.9672	8.44749
PL	PL51	PL515	Jeleniogorski	4.34783	9	0	8.44749	8.44749	21.5385	8.44749	100	8.44749	100	4	46.5753	50.6234		960.488	836.042	836.042	765.417	600.558	0	0	428.786	362.819	284.674	0	0		836.042	21.5385	100	100	BioE_COM-S	21.5385	600.558	235.484	28.1665
PL	PL51	PL516	Legnicko-Glogowski	4.34783	9	0	8.44749	8.44749	100	8.44749	100	8.44749	100	4	46.5753	50.6234		334.189	290.89	290.89	266.317	0	0	0	149.191	126.238	0	0	0		290.89	100	100	100		100	0	290.89	100
PL	PL51	PL517	Walbrzyski	4.34783	9	0	8.44749	8.44749	0	8.44749	0	8.44749	0	4	46.5753	50.6234		1030.84	897.281	897.281	821.483	821.483	821.483	821.483	460.194	389.395	389.395	389.395	389.395		897.281	0	0	0	BioE_COM-S & BioE_COM-M & BioE_COM-L	0	821.483	75.7977	8.44749
PL	PL51	PL518	Wroclawski	4.34783	9	0	8.44749	5.67823	21.8009	5.67823	66.8246	5.67823	100	4	46.5753	50.6234		5804.42	5052.37	5052.37	4625.57	3726.56	1580.96	0	2591.24	2192.59	1766.45	749.401	0		5052.37	21.8009	66.8246	100	BioE_COM-S	21.8009	3726.56	1325.8	26.2413
PL	PL52	PL523	Nyski	0	9	0	7.76699	7.76699	100	7.76699	100	7.76699	100	4	35.9223	38.9474		1317.55	1198.97	1198.97	1105.84	0	0	0	737.54	648.141	0	0	0		1198.97	100	100	100		100	0	1198.97	100
PL	PL52	PL524	Opolski	0	9	0	7.76699	5.67823	38.8889	5.67823	100	5.67823	100	4	35.9223	38.9474		1039.65	946.078	946.078	872.597	545.33	0	0	581.976	511.433	319.621	0	0		946.078	38.8889	100	100	BioE_COM-S	38.8889	545.33	400.749	42.3589
PL	PL61	PL613	Bydgosko-Torunski	0	9	0	5.67823	2.52874	0	2.52874	100	2.52874	100	4	21.6088	22.9097		2902.35	2641.14	2641.14	2491.17	2574.35	0	0	1987.6	1843.63	1905.19	0	0		2641.14	0	100	100	BioE_COM-S	0	2574.35	66.7873	2.52874
PL	PL61	PL616	Grudziadzki	0	9	0	5.67823	5.67823	40.678	5.67823	100	5.67823	100	4	21.6088	22.9097		2691.99	2449.71	2449.71	2310.61	1370.7	0	0	1843.54	1710.01	1014.41	0	0		2449.71	40.678	100	100	BioE_COM-S	40.678	1370.7	1079.01	44.0464
PL	PL61	PL617	Inowroclawski	0	9	0	5.67823	5.67823	25	5.67823	100	5.67823	100	4	21.6088	22.9097		3096.38	2817.7	2817.7	2657.71	1993.28	0	0	2120.48	1966.88	1475.16	0	0		2817.7	25	100	100	BioE_COM-S	25	1993.28	824.423	29.2587
PL	PL61	PL618	Swiecki	0	9	0	5.67823	5.67823	0	5.67823	100	5.67823	100	4	21.6088	22.9097		2629.38	2392.73	2392.73	2256.87	2256.87	0	0	1800.66	1670.23	1670.23	0	0		2392.73	0	100	100	BioE_COM-S	0	2256.87	135.865	5.67823
PL	PL61	PL619	Wloclawski	0	9	0	5.67823	2.95699	74.4898	2.95699	100	2.95699	100	4	21.6088	22.9097		3108.65	2828.88	2828.88	2668.25	700.313	0	0	2128.89	1974.68	518.278	0	0		2828.88	74.4898	100	100	BioE_COM-S	74.4898	700.313	2128.56	75.2441
PL	PL62	PL621	Elblaski	0	9	0	2.52874	2.52874	0	2.52874	100	2.52874	100	4	100	100		2375.38	2161.6	2161.6	2106.94	2106.94	0	0	0	0	0	0	0		2161.6	0	100	100	BioE_COM-S	0	2106.94	54.6612	2.52874
PL	PL62	PL622	Olsztynski	0	9	0	2.52874	2.52874	0	2.52874	100	2.52874	100	4	100	100		5701.3	5188.19	5188.19	5056.99	5056.99	0	0	0	0	0	0	0		5188.19	0	100	100	BioE_COM-S	0	5056.99	131.196	2.52874
PL	PL62	PL623	Elcki	0	9	0	2.52874	2.95699	0	2.95699	0	2.95699	0	4	100	100		1038.23	944.786	944.786	920.894	916.848	916.848	916.848	0	0	0	0	0		944.786	0	0	0	BioE_COM-S & BioE_COM-M & BioE_COM-L	0	916.848	27.9372	2.95699
PL	PL63	PL633	Trojmiejski	0	9	0	2.95699	2.95699	0	2.95699	0	2.95699	0	4	38.172	39.0582		90.0007	81.9007	81.9007	79.4789	79.4789	79.4789	79.4789	48.612	46.4984	46.4984	46.4984	46.4984		81.9007	0	0	0	BioE_COM-S & BioE_COM-M & BioE_COM-L	0	79.4789	2.42179	2.95699
PL	PL63	PL634	Gdanski	0	9	0	2.95699	8.51466	0	8.51466	100	8.51466	100	4	38.172	39.0582		732.208	666.309	666.309	646.606	609.575	0	0	395.487	378.292	356.627	0	0		666.309	0	100	100	BioE_COM-S	0	609.575	56.734	8.51466
PL	PL63	PL636	Slupski	0	9	0	2.95699	2.95699	100	2.95699	100	2.95699	100	4	38.172	39.0582		1985.88	1807.15	1807.15	1753.71	0	0	0	1072.63	1025.99	0	0	0		1807.15	100	100	100		100	0	1807.15	100
PL	PL63	PL637	Chojnicki	0	9	0	2.95699	2.95699	0	2.95699	0	2.95699	0	4	38.172	39.0582		2076.21	1889.35	1889.35	1833.49	1833.49	1833.49	1833.49	1121.42	1072.67	1072.67	1072.67	1072.67		1889.35	0	0	0	BioE_COM-S & BioE_COM-M & BioE_COM-L	0	1833.49	55.868	2.95699
PL	PL63	PL638	Starogardzki	0	9	0	2.95699	8.51466	29.2593	8.51466	100	8.51466	100	4	38.172	39.0582		1746.32	1589.15	1589.15	1542.16	1028.46	0	0	943.238	902.228	601.69	0	0		1589.15	29.2593	100	100	BioE_COM-S	29.2593	1028.46	560.694	35.2826
PT	PT11	PT111	Alto Minho	0	9	0	8.51466	8.51466	10.6815	8.51466	24.1992	8.51466	16.3821	0	19.5837	21.4064		486.287	442.522	442.522	404.842	361.599	306.874	338.521	355.859	318.18	284.194	241.183	266.055		442.522	10.6815	24.1992	16.3821	BioE_COM-S	10.6815	361.599	80.9226	18.2867
PT	PT11	PT112	Cavado	0	9	0	8.51466	12.5698	1.1536	12.5698	1.56448	12.5698	0	0	19.5837	21.4064		800.918	728.835	728.835	666.777	629.871	627.253	637.222	586.102	524.044	495.038	492.98	500.815		728.835	1.1536	1.56448	0	BioE_COM-L	0	637.222	91.6134	12.5698
PT	PT11	PT119	Ave	0.035317	9	0	8.51466	8.51466	10.7364	8.51466	13.1203	8.51466	6.85149	0	19.5837	21.4064		740.286	673.423	673.423	616.083	549.938	535.251	573.872	541.542	484.202	432.216	420.673	451.027		673.423	10.7364	13.1203	6.85149	BioE_COM-L	6.85149	573.872	99.5506	14.7828
PT	PT11	PT11A	Area Metropolitana do Porto	0.244227	9	0	8.51466	8.51466	16.5187	8.51466	48.468	8.51466	12.0337	0	19.5837	21.4064		557.132	505.752	505.752	462.689	386.259	238.433	407.01	406.707	363.644	303.575	187.393	319.884		505.752	16.5187	48.468	12.0337	BioE_COM-L	12.0337	407.01	98.7419	19.5238
PT	PT11	PT11B	Alto Tamega	0.44104	9	0	8.51466	8.51466	30.3621	8.51466	48.2126	8.51466	36.1653	0	19.5837	21.4064		3055.55	2768.29	2768.29	2532.58	1763.63	1311.56	1616.66	2226.15	1990.44	1386.1	1030.8	1270.59		2768.29	30.3621	48.2126	36.1653	BioE_COM-S	30.3621	1763.63	1004.65	36.2915
PT	PT11	PT11C	Tamega e Sousa	1.6478	9	0	8.51466	8.51466	4.46541	8.51466	6.83019	8.51466	0	0	19.5837	21.4064		149.127	133.47	133.47	122.105	116.653	113.765	122.105	107.331	95.9668	91.6815	89.4121	95.9668		133.47	4.46541	6.83019	0	BioE_COM-L	0	122.105	11.3645	8.51466
PT	PT11	PT11D	Douro	2.08972	9	0	8.51466	8.51466	2.84701	8.51466	2.46357	8.51466	0.349885	0	19.5837	21.4064		10012.2	8920.67	8920.67	8161.11	7928.76	7960.05	8132.55	7173.67	6414.11	6231.5	6256.09	6391.66		8920.67	2.84701	2.46357	0.349885	BioE_COM-L	0.349885	8132.55	788.12	8.83476
PT	PT11	PT11E	Terras de Tras-s-Montes	0	9	0	8.51466	8.62676	10.4786	8.62676	20.695	8.62676	9.82893	0	19.5837	21.4064		5252.4	4779.68	4779.68	4372.71	3909.71	3463.53	3938.09	3843.64	3436.67	3072.78	2722.11	3095.08		4779.68	10.4786	20.695	9.82893	BioE_COM-L	9.82893	3938.09	841.595	17.6078
PT	PT15	PT150	Algarve	0	9	0	12.5698	8.62676	9.20347	8.62676	23.7171	8.62676	21.5216	0	4.18994	4.79233		5679.17	5168.05	5168.05	4518.43	4287.6	3602.24	3705.92	4951.51	4301.89	4082.13	3429.61	3528.32		5168.05	9.20347	23.7171	21.5216	BioE_COM-S	9.20347	4287.6	880.443	17.0363
PT	PT16	PT16B	Oeste	0	9	0	8.62676	4.74684	5.66636	4.74684	7.94967	4.74684	1.6589	0	2.68486	2.93834		35554.6	32354.7	32354.7	29563.5	29072.6	28368.9	30307.6	31486	28694.8	28218.3	27535.3	29417.1		32354.7	5.66636	7.94967	1.6589	BioE_COM-L	1.6589	30307.6	2047.08	6.32699
PT	PT16	PT16D	Regiao de Aveiro	0	9	0	8.62676	8.62676	32.0748	8.62676	90.5434	8.62676	78.1581	0	2.68486	2.93834		776.885	706.965	706.965	645.977	438.781	61.0874	141.094	687.984	626.996	425.888	59.2925	136.948		706.965	32.0748	90.5434	78.1581	BioE_COM-S	32.0748	438.781	268.184	37.9345
PT	PT16	PT16E	Regiao de Coimbra	0.062135	9	0	8.62676	8.62676	35.0938	8.62676	83.0496	8.62676	41.6801	0	2.68486	2.93834		640.386	582.389	582.389	532.147	345.397	90.2012	310.348	566.752	516.511	335.248	87.5508	301.229		582.389	35.0938	83.0496	41.6801	BioE_COM-S	35.0938	345.397	236.992	40.6931
PT	PT16	PT16F	Regiao de Leiria	0	9	0	8.62676	8.62676	39.3122	8.62676	88.1996	8.62676	38.8177	0	2.68486	2.93834		1929.55	1755.89	1755.89	1604.42	973.686	189.328	981.62	1708.75	1557.27	945.076	183.765	952.776		1755.89	39.3122	88.1996	38.8177	BioE_COM-L	38.8177	981.62	774.275	44.0958
PT	PT16	PT16G	Viseu Dao Lafoes	0.695987	9	0	8.62676	8.62676	41.4038	8.62676	66.0595	8.62676	28.2393	0	2.68486	2.93834		424.114	383.258	383.258	350.195	205.201	118.858	251.302	372.968	339.905	199.171	115.365	243.918		383.258	41.4038	66.0595	28.2393	BioE_COM-L	28.2393	251.302	131.955	34.4299
PT	PT16	PT16H	Beira Baixa	0	9	0	8.62676	8.62676	56.8925	8.62676	99.3741	8.62676	82.1937	0	2.68486	2.93834		2134.69	1942.56	1942.56	1774.98	765.151	11.1093	316.059	1890.41	1722.83	742.668	10.7828	306.772		1942.56	56.8925	99.3741	82.1937	BioE_COM-S	56.8925	765.151	1177.41	60.6113
PT	PT16	PT16I	Medio Tejo	0	9	0	8.62676	8.62676	20.1787	8.62676	28.6585	8.62676	15.8729	0	2.68486	2.93834		446.521	406.334	406.334	371.281	296.361	264.877	312.348	395.425	360.371	287.653	257.094	303.17		406.334	20.1787	28.6585	15.8729	BioE_COM-L	15.8729	312.348	93.9864	23.1303
PT	PT16	PT16J	Beiras e Serra Da Estrela	0.127551	9	0	8.62676	21.2598	33.2164	21.2598	55.4634	21.2598	44.4622	0	2.68486	2.93834		1534.44	1394.56	1394.56	1274.25	733.335	489.046	609.848	1357.12	1236.81	711.787	474.676	591.929		1394.56	33.2164	55.4634	44.4622	BioE_COM-S	33.2164	733.335	661.222	47.4145
PT	PT17	PT170	Area Metropolitana de Lisboa	0	9	0	21.2598	4.74684	22.1436	4.74684	41.9172	4.74684	56.7386	0	0	0		3509.07	3193.25	3193.25	2514.37	2368.14	1766.69	1315.87	3193.25	2514.37	2368.14	1766.69	1315.87		3193.25	22.1436	41.9172	56.7386	BioE_COM-S	22.1436	2368.14	825.114	25.8393
PT	PT18	PT181	Alentejo Litoral	0	9	0	4.74684	4.74684	62.3529	4.74684	100	4.74684	100	0	30.0633	31.5615		2092.14	1903.85	1903.85	1813.48	682.721	0	0	1331.49	1241.12	467.245	0	0		1903.85	62.3529	100	100	BioE_COM-S	62.3529	682.721	1221.13	64.14
PT	PT18	PT184	Baixo Alentejo	0	9	0	4.74684	4.74684	14.0254	4.74684	25.7774	4.74684	12.7443	0	30.0633	31.5615		403.429	367.12	367.12	349.693	300.648	259.552	305.127	256.752	239.325	205.759	177.633	208.825		367.12	14.0254	25.7774	12.7443	BioE_COM-L	12.7443	305.127	61.9927	16.8862
PT	PT18	PT185	Leziria do Tejo	0	9	0	4.74684	48.1481	10.8393	48.1481	14.3794	48.1481	4.81137	0	30.0633	31.5615		1380.19	1255.97	1255.97	1196.35	580.654	557.599	619.911	878.385	818.766	397.391	381.613	424.258		1255.97	10.8393	14.3794	4.81137	BioE_COM-L	4.81137	619.911	636.061	50.6429
PT	PT18	PT186	Alto Alentejo	0	9	0	4.74684	4.74684	27.5234	4.74684	58.9173	4.74684	29.3617	0	30.0633	31.5615		1320.72	1201.86	1201.86	1144.81	829.717	470.318	808.672	840.539	783.489	567.846	321.879	553.443		1201.86	27.5234	58.9173	29.3617	BioE_COM-S	27.5234	829.717	372.14	30.9637
PT	PT18	PT187	Alentejo Central	0	9	0	4.74684	10.8397	31.1583	10.8397	53.8704	10.8397	30.2766	0	30.0633	31.5615		806.93	734.307	734.307	699.45	450.713	302.015	456.486	513.55	478.694	308.462	206.695	312.412		734.307	31.1583	53.8704	30.2766	BioE_COM-L	30.2766	456.486	277.82	37.8344
PT	PT20	PT200	Regiao Autonoma dos Acores	0	9	0	48.1481	88.4956	100	88.4956	100	88.4956	100	0	0	0		1017.88	926.27	926.27	480.288	0	0	0	926.27	480.288	0	0	0		926.27	100	100	100		100	0	926.27	100
PT	PT30	PT300	Regiao Autonoma da Madeira	0	9	0	88.4956	22.3058	59.6859	22.3058	100	22.3058	100	0	3.53982	15.3846		3164	2879.24	2879.24	331.24	901.829	0	0	2777.32	280.28	763.086	0	0		2879.24	59.6859	100	100	BioE_COM-S	59.6859	901.829	1977.41	68.6782
RO	RO11	RO111	Bihor	0	9	0	22.3058	22.3058	75.7612	22.3058	88.9659	22.3058	100	5	0	0		8229.47	7488.81	7488.81	5818.38	1410.3	642.004	0	7114.37	5527.46	1339.79	609.903	0		7488.81	75.7612	88.9659	100	BioE_COM-S	75.7612	1410.3	6078.51	81.1679
RO	RO11	RO112	Bistrita-Nasaud	0	9	0	22.3058	22.3058	29.4385	22.3058	51.6515	22.3058	44.9628	5	0	0		11224.8	10214.5	10214.5	7936.1	5599.83	3836.98	4367.8	9703.8	7539.29	5319.84	3645.13	4149.41		10214.5	29.4385	51.6515	44.9628	BioE_COM-S	29.4385	5599.83	4614.69	45.1778
RO	RO11	RO113	Cluj	0	9	0	22.3058	22.3058	60.9155	22.3058	74.1549	22.3058	90.8451	5	0	0		7443.51	6773.59	6773.59	5262.69	2056.9	1360.15	481.796	6434.91	4999.56	1954.05	1292.14	457.706		6773.59	60.9155	74.1549	90.8451	BioE_COM-S	60.9155	2056.9	4716.69	69.6336
RO	RO11	RO114	Maramures	0	9	0	22.3058	22.3058	58.9136	22.3058	91.9684	22.3058	100	5	0	0		13212.5	12023.4	12023.4	9341.46	3838.06	750.265	0	11422.2	8874.38	3646.16	712.752	0		12023.4	58.9136	91.9684	100	BioE_COM-S	58.9136	3838.06	8185.29	68.0783
RO	RO11	RO115	Satu Mare	0	9	0	22.3058	22.3058	76.7145	22.3058	99.9362	22.3058	99.362	5	0	0		15557.4	14157.2	14157.2	10999.3	2561.25	7.01712	70.1712	13449.3	10449.4	2433.19	6.66626	66.6626		14157.2	76.7145	99.9362	99.362	BioE_COM-S	76.7145	2561.25	11596	81.9085
RO	RO11	RO116	Salaj	0	9	0	22.3058	10.453	72.7419	10.453	95.9855	10.453	100	5	0	0		12154.5	11060.6	11060.6	8593.41	2699.75	397.607	0	10507.5	8163.74	2564.77	377.727	0		11060.6	72.7419	95.9855	100	BioE_COM-S	72.7419	2699.75	8360.8	75.5912
RO	RO12	RO121	Alba	0	9	0	10.453	10.453	100	10.453	100	10.453	100	5	5.57491	6.22568		2302.36	2095.15	2095.15	1876.15	0	0	0	1879.43	1671.38	0	0	0		2095.15	100	100	100		100	0	2095.15	100
RO	RO12	RO122	Brasov	0	9	0	10.453	10.453	60.4435	10.453	100	10.453	100	5	5.57491	6.22568		1091.99	993.709	993.709	889.837	351.989	0	0	891.395	792.717	313.571	0	0		993.709	60.4435	100	100	BioE_COM-S	60.4435	351.989	641.721	64.5783
RO	RO12	RO123	Covasna	0	9	0	10.453	10.453	100	10.453	100	10.453	100	5	5.57491	6.22568		352.8	321.048	321.048	287.489	0	0	0	287.992	256.111	0	0	0		321.048	100	100	100		100	0	321.048	100
RO	RO12	RO124	Harghita	0	9	0	10.453	10.453	100	10.453	100	10.453	100	5	5.57491	6.22568		286.079	260.332	260.332	233.12	0	0	0	233.528	207.676	0	0	0		260.332	100	100	100		100	0	260.332	100
RO	RO12	RO125	Mures	0	9	0	10.453	10.453	94.2627	10.453	100	10.453	100	5	5.57491	6.22568		8341.65	7590.9	7590.9	6797.43	389.992	0	0	6809.33	6055.53	347.427	0	0		7590.9	94.2627	100	100	BioE_COM-S	94.2627	389.992	7200.91	94.8624
RO	RO12	RO126	Sibiu	0	9	0	10.453	20.5809	99.8514	20.5809	100	20.5809	100	5	5.57491	6.22568		7771.9	7072.43	7072.43	6333.15	8.3491	0	0	6344.24	5641.93	7.43785	0	0		7072.43	99.8514	100	100	BioE_COM-S	99.8514	8.3491	7064.08	99.8819
RO	RO21	RO211	Bacau	0	9	0	20.5809	20.5809	80.4152	20.5809	100	20.5809	100	5	0	0		3693.61	3361.19	3361.19	2669.42	522.801	0	0	3193.13	2535.95	496.661	0	0		3361.19	80.4152	100	100	BioE_COM-S	80.4152	522.801	2838.39	84.4459
RO	RO21	RO212	Botosani	0	9	0	20.5809	20.5809	100	20.5809	100	20.5809	100	5	0	0		3990.01	3630.91	3630.91	2883.63	0	0	0	3449.36	2739.45	0	0	0		3630.91	100	100	100		100	0	3630.91	100
RO	RO21	RO213	Iasi	0	9	0	20.5809	20.5809	64.1917	20.5809	100	20.5809	100	5	0	0		9102.86	8283.6	8283.6	6578.76	2355.74	0	0	7869.42	6249.82	2237.95	0	0		8283.6	64.1917	100	100	BioE_COM-S	64.1917	2355.74	5927.86	71.5614
RO	RO21	RO214	Neamt	0	9	0	20.5809	20.5809	100	20.5809	100	20.5809	100	5	0	0		1988.43	1809.47	1809.47	1437.06	0	0	0	1719	1365.21	0	0	0		1809.47	100	100	100		100	0	1809.47	100
RO	RO21	RO215	Suceava	0	9	0	20.5809	20.5809	65.9873	20.5809	100	20.5809	100	5	0	0		4242.63	3860.8	3860.8	3066.21	1042.9	0	0	3667.76	2912.9	990.757	0	0		3860.8	65.9873	100	100	BioE_COM-S	65.9873	1042.9	2817.9	72.9874
RO	RO21	RO216	Vaslui	0	9	0	20.5809	16.8262	81.2376	16.8262	100	16.8262	100	5	0	0		7080.38	6443.14	6443.14	5117.09	1005.48	0	0	6120.99	4861.23	955.207	0	0		6443.14	81.2376	100	100	BioE_COM-S	81.2376	1005.48	5437.66	84.3946
RO	RO22	RO221	Braila	0	9	0	16.8262	16.8262	100	16.8262	100	16.8262	100	5	0	0		1275.51	1160.72	1160.72	965.413	0	0	0	1102.68	917.143	0	0	0		1160.72	100	100	100		100	0	1160.72	100
RO	RO22	RO222	Buzau	0	9	0	16.8262	16.8262	25.9233	16.8262	67.9717	16.8262	26.0242	5	0	0		12147.3	11054	11054	9194.07	6810.66	2944.7	6801.39	10501.3	8734.37	6470.13	2797.47	6461.32		11054	25.9233	67.9717	26.0242	BioE_COM-S	25.9233	6810.66	4243.38	38.3876
RO	RO22	RO223	Constanta	0	9	0	16.8262	16.8262	55.8962	16.8262	100	16.8262	100	5	0	0		5697.88	5185.07	5185.07	4312.62	1902.03	0	0	4925.81	4096.99	1806.93	0	0		5185.07	55.8962	100	100	BioE_COM-S	55.8962	1902.03	3283.04	63.3172
RO	RO22	RO224	Galati	0	9	0	16.8262	16.8262	75.9702	16.8262	100	16.8262	100	5	0	0		1802.11	1639.92	1639.92	1363.99	327.764	0	0	1557.93	1295.79	311.376	0	0		1639.92	75.9702	100	100	BioE_COM-S	75.9702	327.764	1312.16	80.0135
RO	RO22	RO225	Tulcea	0	9	0	16.8262	16.8262	70.3301	16.8262	100	16.8262	100	5	0	0		964.165	877.391	877.391	729.759	216.519	0	0	833.521	693.271	205.693	0	0		877.391	70.3301	100	100	BioE_COM-S	70.3301	216.519	660.871	75.3224
RO	RO22	RO226	Vrancea	0	9	0	16.8262	44.4741	22.9167	44.4741	36.7883	44.4741	26.1905	5	0	0		5854.26	5327.38	5327.38	4430.98	2280.18	1869.85	2183.34	5061.01	4209.43	2166.17	1776.36	2074.17		5327.38	22.9167	36.7883	26.1905	BioE_COM-S	22.9167	2280.18	3047.19	57.1988
RO	RO31	RO311	Arges	0	9	0	44.4741	44.4741	23.6674	44.4741	39.0563	44.4741	24.1124	5	0	0		46801.2	42589.1	42589.1	23648	18051.1	14412	17945.9	40459.6	22465.6	17148.6	13691.4	17048.6		42589.1	23.6674	39.0563	24.1124	BioE_COM-S	23.6674	18051.1	24538	57.6156
RO	RO31	RO312	Calarasi	0	9	0	44.4741	44.4741	100	44.4741	100	44.4741	100	5	0	0		783.852	713.305	713.305	396.069	0	0	0	677.64	376.266	0	0	0		713.305	100	100	100		100	0	713.305	100
RO	RO31	RO313	Dambovita	0	9	0	44.4741	44.4741	30.51	44.4741	38.3652	44.4741	23.9754	5	0	0		29695	27022.5	27022.5	15004.5	10426.6	9247.97	11407.1	25671.3	14254.2	9905.27	8785.57	10836.7		27022.5	30.51	38.3652	23.9754	BioE_COM-L	23.9754	11407.1	15615.4	57.7867
RO	RO31	RO314	Giurgiu	0	9	0	44.4741	44.4741	92.4991	44.4741	100	44.4741	100	5	0	0		1688.79	1536.8	1536.8	853.324	64.0072	0	0	1459.96	810.658	60.8068	0	0		1536.8	92.4991	100	100	BioE_COM-S	92.4991	64.0072	1472.8	95.835
RO	RO31	RO315	Ialomita	0	9	0	44.4741	44.4741	100	44.4741	100	44.4741	100	5	0	0		500.447	455.407	455.407	252.869	0	0	0	432.636	240.225	0	0	0		455.407	100	100	100		100	0	455.407	100
RO	RO31	RO316	Prahova	0	9	0	44.4741	44.4741	14.9817	44.4741	29.9634	44.4741	13.5482	5	0	0		13574	12352.3	12352.3	6858.73	5831.18	4803.63	5929.5	11734.7	6515.8	5539.62	4563.45	5633.03		12352.3	14.9817	29.9634	13.5482	BioE_COM-L	13.5482	5929.5	6422.82	51.9969
RO	RO31	RO317	Teleorman	0	9	0	44.4741	11.8644	100	11.8644	100	11.8644	100	5	0	0		575.647	523.839	523.839	290.866	0	0	0	497.647	276.323	0	0	0		523.839	100	100	100		100	0	523.839	100
RO	RO32	RO321	Bucuresti	0	9	0	11.8644	11.8644	100	11.8644	100	11.8644	100	5	0	0		241.154	219.45	219.45	193.414	0	0	0	208.478	183.743	0	0	0		219.45	100	100	100		100	0	219.45	100
RO	RO32	RO322	Ilfov	0	9	0	11.8644	29.0041	100	29.0041	100	29.0041	100	5	0	0		1347.75	1226.45	1226.45	1080.94	0	0	0	1165.13	1026.89	0	0	0		1226.45	100	100	100		100	0	1226.45	100
RO	RO41	RO411	Dolj	0	9	0	29.0041	29.0041	85.884	29.0041	100	29.0041	100	5	0	0		6762.88	6154.22	6154.22	4369.25	616.763	0	0	5846.51	4150.78	585.925	0	0		6154.22	85.884	100	100	BioE_COM-S	85.884	616.763	5537.46	89.9782
RO	RO41	RO412	Gorj	0	9	0	29.0041	29.0041	90.4497	29.0041	100	29.0041	100	5	0	0		8104.03	7374.67	7374.67	5235.71	500.024	0	0	7005.94	4973.93	475.023	0	0		7374.67	90.4497	100	100	BioE_COM-S	90.4497	500.024	6874.65	93.2197
RO	RO41	RO413	Mehedinti	0	9	0	29.0041	29.0041	95.4366	29.0041	100	29.0041	100	5	0	0		7796.32	7094.65	7094.65	5036.91	229.853	0	0	6739.92	4785.07	218.36	0	0		7094.65	95.4366	100	100	BioE_COM-S	95.4366	229.853	6864.8	96.7602
RO	RO41	RO414	Olt	0	9	0	29.0041	29.0041	96.4854	29.0041	100	29.0041	100	5	0	0		9395.19	8549.62	8549.62	6069.88	213.33	0	0	8122.14	5766.38	202.663	0	0		8549.62	96.4854	100	100	BioE_COM-S	96.4854	213.33	8336.29	97.5048
RO	RO41	RO415	Valcea	0	9	0	29.0041	5.48847	32.7023	5.48847	51.0002	5.48847	40.8198	5	0	0		23004.8	20934.4	20934.4	14862.6	13315.1	9694.82	11709.1	19887.7	14119.4	12649.4	9210.08	11123.6		20934.4	32.7023	51.0002	40.8198	BioE_COM-S	32.7023	13315.1	7619.26	36.3959
RO	RO42	RO421	Arad	0	9	0	5.48847	5.48847	85.785	5.48847	100	5.48847	100	5	0	0		10729.4	9763.75	9763.75	9227.87	1311.74	0	0	9275.57	8766.48	1246.15	0	0		9763.75	85.785	100	100	BioE_COM-S	85.785	1311.74	8452.01	86.5652
RO	RO42	RO422	Caras-Severin	0	9	0	5.48847	5.48847	47.6323	5.48847	77.3264	5.48847	86.4669	5	0	0		19310.4	17572.5	17572.5	16608	8697.22	3765.63	2247.57	16693.8	15777.6	8262.36	3577.35	2135.19		17572.5	47.6323	77.3264	86.4669	BioE_COM-S	47.6323	8697.22	8875.24	50.5065
RO	RO42	RO423	Hunedoara	0	9	0	5.48847	5.48847	69.5897	5.48847	100	5.48847	100	5	0	0		2322.03	2113.05	2113.05	1997.07	607.317	0	0	2007.39	1897.22	576.951	0	0		2113.05	69.5897	100	100	BioE_COM-S	69.5897	607.317	1505.73	71.2587
RO	RO42	RO424	Timis	0	9	0	5.48847	0	88.7281	0	100	0	100	5	0	0		15140.3	13777.7	13777.7	13021.5	1553.02	0	0	13088.8	12370.4	1475.36	0	0		13777.7	100	100	100	BioE_COM-S	88.7281	1553.02	12224.7	88.7281
SE	SE11	SE110	Stockholms lan	0	9	0	0	0	100	0	100	0	100	1	50	50		30	27.3	27.3	27.3	0	0	0	13.5135	13.5135	0	0	0		27.3	100	100	100		100	0	27.3	100
SE	SE12	SE121	Uppsala lan	0	9	0	0	0	0	0	0	0	0	1	25	25		30	27.3	27.3	27.3	27.3	27.3	27.3	20.2703	20.2703	20.2703	20.2703	20.2703		27.3	100	100	100	BioE_COM-S & BioE_COM-M & BioE_COM-L	0	27.3	0	0
SE	SE12	SE122	Sodermanlands lan	0	9	0	0	0	0	0	0	0	0	1	25	25		0	0	0	0	0	0	0	0	0	0	0	0		0	100	100	100		0	0	0	0
SE	SE12	SE123	Ostergotlands lan	0	9	0	0	0	100	0	100	0	100	1	25	25		0	0	0	0	0	0	0	0	0	0	0	0		0	100	100	100		0	0	0	0
SE	SE12	SE124	Orebro lan	0	9	0	0	0	0	0	0	0	0	1	25	25		15	13.65	13.65	13.65	13.65	13.65	13.65	10.1351	10.1351	10.1351	10.1351	10.1351		13.65	100	100	100	BioE_COM-S & BioE_COM-M & BioE_COM-L	0	13.65	0	0
SE	SE12	SE125	Vastmanlands lan	0	9	0	0	0	0	0	0	0	0	1	25	25		0	0	0	0	0	0	0	0	0	0	0	0		0	100	100	100		0	0	0	0
SE	SE21	SE211	Jonkopings lan	0	9	0	0	0	100	0	100	0	100	1	18.1818	18.1818		135	122.85	122.85	122.85	0	0	0	99.5085	99.5085	0	0	0		122.85	100	100	100		100	0	122.85	100
SE	SE21	SE212	Kronobergs lan	0	9	0	0	0	0	0	0	0	0	1	18.1818	18.1818		30	27.3	27.3	27.3	27.3	27.3	27.3	22.113	22.113	22.113	22.113	22.113		27.3	100	100	100	BioE_COM-S & BioE_COM-M & BioE_COM-L	0	27.3	0	0
SE	SE21	SE213	Kronobergs lan	0	9	0	0	0	100	0	100	0	100	1	18.1818	18.1818		15	13.65	13.65	13.65	0	0	0	11.0565	11.0565	0	0	0		13.65	100	100	100		100	0	13.65	100
SE	SE21	SE214	Gotlands lan	0	9	0	0	0.636943	0	0.636943	0	0.636943	0	1	18.1818	18.1818		0	0	0	0	0	0	0	0	0	0	0	0		0	0	0	0		0	0	0	0
SE	SE22	SE221	Blekinge lan	0	9	0	0.636943	0.636943	0	0.636943	0	0.636943	0	1	4.4586	4.48718		60.0792	54.6721	54.6721	54.3238	54.3238	54.3238	54.3238	51.7121	51.3674	51.3674	51.3674	51.3674		54.6721	0	0	0	BioE_COM-S & BioE_COM-M & BioE_COM-L	0	54.3238	0.34823	0.636943
SE	SE22	SE224	Skane lan	0	9	0	0.636943	0	46.4589	0	100	0	100	1	4.4586	4.48718		2359.19	2146.86	2146.86	2133.19	1149.45	0	0	2030.63	2017.09	1086.9	0	0		2146.86	100	100	100	BioE_COM-S	46.4589	1149.45	997.409	46.4589
SE	SE23	SE231	Hallands lan	0	9	0	0	0	0	0	0	0	0	1	33.3333	33.3333		30.2184	27.4988	27.4988	27.4988	27.4988	27.4988	27.4988	18.1492	18.1492	18.1492	18.1492	18.1492		27.4988	100	100	100	BioE_COM-S & BioE_COM-M & BioE_COM-L	0	27.4988	0	0
SE	SE23	SE232	Vastra Gotalands lan	0	9	0	0	0	100	0	100	0	100	1	33.3333	33.3333		150.016	136.515	136.515	136.515	0	0	0	90.0998	90.0998	0	0	0		136.515	100	100	100		100	0	136.515	100
SE	SE31	SE311	Varmlands lan	0	9	0	0	0	0	0	0	0	0	1	0	0		0	0	0	0	0	0	0	0	0	0	0	0		0	100	100	100		0	0	0	0
SE	SE31	SE312	Dalarnas lan	0	9	0	0	0	0	0	0	0	0	1	0	0		0	0	0	0	0	0	0	0	0	0	0	0		0	100	100	100		0	0	0	0
SE	SE31	SE313	Gavleborgs lan	0	9	0	0	0	0	0	0	0	0	1	0	0		0	0	0	0	0	0	0	0	0	0	0	0		0	100	100	100		0	0	0	0
SE	SE32	SE321	Vasternorrlands lan	0	9	0	0	0	0	0	0	0	0	1	0	0		0	0	0	0	0	0	0	0	0	0	0	0		0	100	100	100		0	0	0	0
SE	SE32	SE322	Jamtlands lan	0	9	0	0	0	0	0	0	0	0	1	0	0		0	0	0	0	0	0	0	0	0	0	0	0		0	100	100	100		0	0	0	0
SE	SE33	SE331	Vasterbottens lan	0	9	0	0	0	0	0	0	0	0	1	0	0		0	0	0	0	0	0	0	0	0	0	0	0		0	100	100	100		0	0	0	0
SE	SE33	SE332	Norrbottens lan	0	9	0	0	0	0	0	0	0	0	1	0	0		0	0	0	0	0	0	0	0	0	0	0	0		0	100	100	100		0	0	0	0
SI	SI03	SI031	Pomurska	0	9	0	10.8397	10.8397	46.458	10.8397	100	10.8397	100	0.5	9.61832	10.274		1988	1809.08	1809.08	1612.98	863.623	0	0	1626.9	1440.03	771.02	0	0		1809.08	46.458	100	100	BioE_COM-S	46.458	863.623	945.457	52.2618
SI	SI03	SI032	Podravska	0.922045	9	0	10.8397	10.8397	47.4434	10.8397	98.7427	10.8397	100	0.5	9.61832	10.274		4785.61	4314.75	4314.75	3847.04	2021.87	48.3702	0	3880.24	3434.54	1805.08	43.1836	0		4314.75	47.4434	98.7427	100	BioE_COM-S	47.4434	2021.87	2292.87	53.1404
SI	SI03	SI033	Koroska	0	9	0	10.8397	10.8397	100	10.8397	100	10.8397	100	0.5	9.61832	10.274		997.209	907.46	907.46	809.094	0	0	0	816.077	722.338	0	0	0		907.46	100	100	100		100	0	907.46	100
SI	SI03	SI034	Savinjska	1.92308	9	0	10.8397	10.8397	24.8139	10.8397	28.2878	10.8397	100	0.5	9.61832	10.274		3392.71	3027.99	3027.99	2699.77	2029.85	1936.06	0	2723.07	2410.28	1812.2	1728.47	0		3027.99	24.8139	28.2878	100	BioE_COM-S	24.8139	2029.85	998.143	32.9638
SI	SI03	SI035	Zasavska	1.92308	9	0	10.8397	10.8397	0	10.8397	0	10.8397	0	0.5	9.61832	10.274		402.536	359.263	359.263	320.32	320.32	320.32	320.32	323.085	285.973	285.973	285.973	285.973		359.263	0	0	0	BioE_COM-S & BioE_COM-M & BioE_COM-L	0	320.32	38.943	10.8397
SI	SI03	SI036	Posavska	1.92308	9	0	10.8397	10.8397	62.4183	10.8397	100	10.8397	100	0.5	9.61832	10.274		2666.27	2379.65	2379.65	2121.7	797.371	0	0	2140.01	1894.2	711.872	0	0		2379.65	62.4183	100	100	BioE_COM-S	62.4183	797.371	1582.28	66.492
SI	SI03	SI037	Jugovzhodna Slovenija	1.92308	9	0	10.8397	10.8397	100	10.8397	100	10.8397	100	0.5	9.61832	10.274		1439.38	1284.65	1284.65	1145.4	0	0	0	1155.28	1022.58	0	0	0		1284.65	100	100	100		100	0	1284.65	100
SI	SI03	SI038	Primorsko-notranjska	1.92308	9	0	10.8397	17.3684	0	17.3684	0	17.3684	0	0.5	9.61832	10.274		655.57	585.096	585.096	521.673	483.474	483.474	483.474	526.176	465.736	431.633	431.633	431.633		585.096	0	0	0	BioE_COM-S & BioE_COM-M & BioE_COM-L	0	483.474	101.622	17.3684
SI	SI04	SI041	Osrednjeslovenska	1.92308	9	0	17.3684	17.3684	100	17.3684	100	17.3684	100	0.5	8.42105	9.55414		1165.49	1040.2	1040.2	859.537	0	0	0	947.845	773.528	0	0	0		1040.2	100	100	100		100	0	1040.2	100
SI	SI04	SI042	Gorenjska	1.92308	9	0	17.3684	17.3684	100	17.3684	100	17.3684	100	0.5	8.42105	9.55414		678.522	605.58	605.58	500.401	0	0	0	551.811	450.329	0	0	0		605.58	100	100	100		100	0	605.58	100
SI	SI04	SI043	Goriska	1.92308	9	0	17.3684	17.3684	19.2436	17.3684	45.2725	17.3684	33.7041	0.5	8.42105	9.55414		1645.96	1469.02	1469.02	1213.88	980.283	664.324	804.75	1338.59	1092.41	882.193	597.849	724.224		1469.02	19.2436	45.2725	33.7041	BioE_COM-S	19.2436	980.283	488.74	33.2697
SI	SI04	SI044	Obalno-kraska	1.92308	9	0	17.3684	0	95.2991	0	100	0	100	0.5	8.42105	9.55414		746.387	666.15	666.15	550.451	31.3148	0	0	607.003	495.37	28.1813	0	0		666.15	100	100	100	BioE_COM-S	95.2991	31.3148	634.836	95.2991
SK	SK01	SK010	Bratislavsky kraj	1.92308	9	0	0	1.26582	62.6523	1.26582	100	1.26582	100	15	0	0		827.227	738.3	738.3	738.3	272.248	0	0	627.555	627.555	231.41	0	0		738.3	62.6523	100	100	BioE_COM-S	62.6523	272.248	466.053	63.1251
SK	SK02	SK021	Trnavsky kraj	1.92308	9	0	1.26582	1.26582	93.4251	1.26582	100	1.26582	100	15	12.4473	12.6068		3157.74	2818.28	2818.28	2782.61	182.954	0	0	2097.36	2067.04	135.906	0	0		2818.28	93.4251	100	100	BioE_COM-S	93.4251	182.954	2635.33	93.5083
SK	SK02	SK022	Trenciansky kraj	1.92308	9	0	1.26582	1.26582	78.5938	1.26582	100	1.26582	100	15	12.4473	12.6068		2493.65	2225.58	2225.58	2197.41	470.383	0	0	1656.27	1632.33	349.42	0	0		2225.58	78.5938	100	100	BioE_COM-S	78.5938	470.383	1755.2	78.8647
SK	SK02	SK023	Nitriansky kraj	1.92308	9	0	1.26582	1.75439	100	1.75439	100	1.75439	100	15	12.4473	12.6068		5929.89	5292.42	5292.42	5225.43	0	0	0	3938.61	3881.67	0	0	0		5292.42	100	100	100		100	0	5292.42	100
SK	SK03	SK031	Zilinsky kraj	1.92308	9	0	1.75439	1.75439	100	1.75439	100	1.75439	100	15	45.614	46.4286		153.587	137.077	137.077	134.672	0	0	0	63.368	61.3238	0	0	0		137.077	100	100	100		100	0	137.077	100
SK	SK03	SK032	Banskobystricky kraj	1.92308	9	0	1.75439	1.1236	100	1.1236	100	1.1236	100	15	45.614	46.4286		994.933	887.978	887.978	872.399	0	0	0	410.495	397.253	0	0	0		887.978	100	100	100		100	0	887.978	100
SK	SK04	SK041	Presovsky kraj	1.92308	9	0	1.1236	1.1236	100	1.1236	100	1.1236	100	15	0	0		974.712	869.93	869.93	860.156	0	0	0	739.441	731.133	0	0	0		869.93	100	100	100		100	0	869.93	100
SK	SK04	SK042	Kosicky kraj	1.92308	9	0	1.1236	0	99.7199	0	100	0	100	15	0	0		936.093	835.463	835.463	826.076	2.34023	0	0	710.143	702.164	1.9892	0	0		835.463	100	100	100	BioE_COM-S	99.7199	2.34023	833.123	99.7199
UK	UKC1	UKC11	Hartlepool and Stockton-On-Tees	1.92308	9	0	0	0	0	0	0	0	0	1	0	0		0	0	0	0	0	0	0	0	0	0	0	0		0	100	100	100		0	0	0	0
UK	UKC1	UKC12	South Teesside	1.92308	9	0	0	0	0	0	0	0	0	1	0	0		0	0	0	0	0	0	0	0	0	0	0	0		0	100	100	100		0	0	0	0
UK	UKC1	UKC13	Darlington	1.92308	9	0	0	0	0	0	0	0	0	1	0	0		0	0	0	0	0	0	0	0	0	0	0	0		0	100	100	100		0	0	0	0
UK	UKC1	UKC14	Durham CC	1.92308	9	0	0	0	0	0	0	0	0	1	0	0		0	0	0	0	0	0	0	0	0	0	0	0		0	100	100	100		0	0	0	0
UK	UKC2	UKC21	Northumberland	1.92308	9	0	0	0	0	0	0	0	0	1	0	0		0	0	0	0	0	0	0	0	0	0	0	0		0	100	100	100		0	0	0	0
UK	UKC2	UKC22	Tyneside	1.92308	9	0	0	0	0	0	0	0	0	1	0	0		0	0	0	0	0	0	0	0	0	0	0	0		0	100	100	100		0	0	0	0
UK	UKC2	UKC23	Sunderland	1.92308	9	0	0	0	0	0	0	0	0	1	0	0		0	0	0	0	0	0	0	0	0	0	0	0		0	100	100	100		0	0	0	0
UK	UKD1	UKD11	West Cumbria	1.92308	9	0	0	0	0	0	0	0	0	1	0	0		0	0	0	0	0	0	0	0	0	0	0	0		0	100	100	100		0	0	0	0
UK	UKD1	UKD12	East Cumbria	1.92308	9	0	0	0	0	0	0	0	0	1	0	0		60	53.55	53.55	53.55	53.55	53.55	53.55	53.0145	53.0145	53.0145	53.0145	53.0145		53.55	100	100	100	BioE_COM-S & BioE_COM-M & BioE_COM-L	0	53.55	0	0
UK	UKD3	UKD33	Manchester	1.92308	9	0	0	0	0	0	0	0	0	1	0	0		0	0	0	0	0	0	0	0	0	0	0	0		0	100	100	100		0	0	0	0
UK	UKD3	UKD34	Greater Manchester South West	1.92308	9	0	0	0	0	0	0	0	0	1	0	0		0	0	0	0	0	0	0	0	0	0	0	0		0	100	100	100		0	0	0	0
UK	UKD3	UKD35	Greater Manchester South East	1.92308	9	0	0	0	0	0	0	0	0	1	0	0		0	0	0	0	0	0	0	0	0	0	0	0		0	100	100	100		0	0	0	0
UK	UKD3	UKD36	Greater Manchester North West	1.92308	9	0	0	0	0	0	0	0	0	1	0	0		0	0	0	0	0	0	0	0	0	0	0	0		0	100	100	100		0	0	0	0
UK	UKD3	UKD37	Greater Manchester North East	1.92308	9	0	0	0	0	0	0	0	0	1	0	0		0	0	0	0	0	0	0	0	0	0	0	0		0	100	100	100		0	0	0	0
UK	UKD4	UKD41	Blackburn with Darwen	1.92308	9	0	0	0	0	0	0	0	0	1	0	0		0	0	0	0	0	0	0	0	0	0	0	0		0	100	100	100		0	0	0	0
UK	UKD4	UKD42	Blackpool	1.92308	9	0	0	0	0	0	0	0	0	1	0	0		0	0	0	0	0	0	0	0	0	0	0	0		0	100	100	100		0	0	0	0
UK	UKD4	UKD44	Lancaster & Wyre	1.92308	9	0	0	0	0	0	0	0	0	1	0	0		7.5	6.69375	6.69375	6.69375	6.69375	6.69375	6.69375	6.62681	6.62681	6.62681	6.62681	6.62681		6.69375	100	100	100	BioE_COM-S & BioE_COM-M & BioE_COM-L	0	6.69375	0	0
UK	UKD4	UKD45	Mid Lancashire	1.92308	9	0	0	0	0	0	0	0	0	1	0	0		7.5	6.69375	6.69375	6.69375	6.69375	6.69375	6.69375	6.62681	6.62681	6.62681	6.62681	6.62681		6.69375	100	100	100	BioE_COM-S & BioE_COM-M & BioE_COM-L	0	6.69375	0	0
UK	UKD4	UKD46	East Lancashire	1.92308	9	0	0	0	0	0	0	0	0	1	0	0		7.5	6.69375	6.69375	6.69375	6.69375	6.69375	6.69375	6.62681	6.62681	6.62681	6.62681	6.62681		6.69375	100	100	100	BioE_COM-S & BioE_COM-M & BioE_COM-L	0	6.69375	0	0
UK	UKD4	UKD47	Chorley & West Lancashire	1.92308	9	0	0	0.555556	0	0.555556	0	0.555556	0	1	0	0		7.5	6.69375	6.69375	6.69375	6.65656	6.65656	6.65656	6.62681	6.62681	6.59	6.59	6.59		6.69375	0	0	0	BioE_COM-S & BioE_COM-M & BioE_COM-L	0	6.65656	0.0371875	0.555556
UK	UKD6	UKD61	Warrington	1.92308	9	0	0	0	0	0	0	0	0	1	0	0		0	0	0	0	0	0	0	0	0	0	0	0		0	100	100	100		0	0	0	0
UK	UKD6	UKD62	Cheshire East	1.92308	9	0	0	0	0	0	0	0	0	1	0	0		0	0	0	0	0	0	0	0	0	0	0	0		0	100	100	100		0	0	0	0
UK	UKD6	UKD63	Cheshire West and Chester	1.92308	9	0	0	0	0	0	0	0	0	1	0	0		0	0	0	0	0	0	0	0	0	0	0	0		0	100	100	100		0	0	0	0
UK	UKD7	UKD71	East Merseyside	1.92308	9	0	0	0	0	0	0	0	0	1	0	0		0	0	0	0	0	0	0	0	0	0	0	0		0	100	100	100		0	0	0	0
UK	UKD7	UKD72	Liverpool	1.92308	9	0	0	0	0	0	0	0	0	1	0	0		0	0	0	0	0	0	0	0	0	0	0	0		0	100	100	100		0	0	0	0
UK	UKD7	UKD73	Sefton	1.92308	9	0	0	0	0	0	0	0	0	1	0	0		0	0	0	0	0	0	0	0	0	0	0	0		0	100	100	100		0	0	0	0
UK	UKD7	UKD74	Wirral	1.92308	9	0	0	0	0	0	0	0	0	1	0	0		0	0	0	0	0	0	0	0	0	0	0	0		0	100	100	100		0	0	0	0
UK	UKE1	UKE11	Kingston Upon Hull, City Of	1.92308	9	0	0	0	0	0	0	0	0	1	0	0		0	0	0	0	0	0	0	0	0	0	0	0		0	100	100	100		0	0	0	0
UK	UKE1	UKE12	East Riding of Yorkshire	1.92308	9	0	0	0	0	0	0	0	0	1	0	0		15	13.3875	13.3875	13.3875	13.3875	13.3875	13.3875	13.2536	13.2536	13.2536	13.2536	13.2536		13.3875	100	100	100	BioE_COM-S & BioE_COM-M & BioE_COM-L	0	13.3875	0	0
UK	UKE1	UKE13	North and North East Lincolnshire	1.92308	9	0	0	0	0	0	0	0	0	1	0	0		0	0	0	0	0	0	0	0	0	0	0	0		0	100	100	100		0	0	0	0
UK	UKE2	UKE21	York	1.92308	9	0	0	0	0	0	0	0	0	1	0	0		0	0	0	0	0	0	0	0	0	0	0	0		0	100	100	100		0	0	0	0
UK	UKE2	UKE22	North Yorkshire CC	1.92308	9	0	0	0	0	0	0	0	0	1	0	0		45	40.1625	40.1625	40.1625	40.1625	40.1625	40.1625	39.7609	39.7609	39.7609	39.7609	39.7609		40.1625	100	100	100	BioE_COM-S & BioE_COM-M & BioE_COM-L	0	40.1625	0	0
UK	UKE3	UKE31	Barnsley, Doncaster and Rotherham	1.92308	9	0	0	0	0	0	0	0	0	1	0	0		15	13.3875	13.3875	13.3875	13.3875	13.3875	13.3875	13.2536	13.2536	13.2536	13.2536	13.2536		13.3875	100	100	100	BioE_COM-S & BioE_COM-M & BioE_COM-L	0	13.3875	0	0
UK	UKE3	UKE32	Sheffield	1.92308	9	0	0	0	0	0	0	0	0	1	0	0		0	0	0	0	0	0	0	0	0	0	0	0		0	100	100	100		0	0	0	0
UK	UKE4	UKE41	Bradford	1.92308	9	0	0	0	0	0	0	0	0	1	0	0		0	0	0	0	0	0	0	0	0	0	0	0		0	100	100	100		0	0	0	0
UK	UKE4	UKE42	Leeds	1.92308	9	0	0	0	0	0	0	0	0	1	0	0		0	0	0	0	0	0	0	0	0	0	0	0		0	100	100	100		0	0	0	0
UK	UKE4	UKE44	Calderdale and Kirklees	1.92308	9	0	0	0	0	0	0	0	0	1	0	0		0	0	0	0	0	0	0	0	0	0	0	0		0	100	100	100		0	0	0	0
UK	UKE4	UKE45	Wakefield	1.92308	9	0	0	0	0	0	0	0	0	1	0	0		0	0	0	0	0	0	0	0	0	0	0	0		0	100	100	100		0	0	0	0
UK	UKF1	UKF11	Derby	1.92308	9	0	0	0	0	0	0	0	0	1	0	0		0	0	0	0	0	0	0	0	0	0	0	0		0	100	100	100		0	0	0	0
UK	UKF1	UKF12	East Derbyshire	1.92308	9	0	0	0	0	0	0	0	0	1	0	0		0	0	0	0	0	0	0	0	0	0	0	0		0	100	100	100		0	0	0	0
UK	UKF1	UKF13	South and West Derbyshire	1.92308	9	0	0	0	100	0	100	0	100	1	0	0		15	13.3875	13.3875	13.3875	0	0	0	13.2536	13.2536	0	0	0		13.3875	100	100	100		100	0	13.3875	100
UK	UKF1	UKF14	Nottingham	1.92308	9	0	0	0	0	0	0	0	0	1	0	0		0	0	0	0	0	0	0	0	0	0	0	0		0	100	100	100		0	0	0	0
UK	UKF1	UKF15	North Nottinghamshire	1.92308	9	0	0	0	0	0	0	0	0	1	0	0		45	40.1625	40.1625	40.1625	40.1625	40.1625	40.1625	39.7609	39.7609	39.7609	39.7609	39.7609		40.1625	100	100	100	BioE_COM-S & BioE_COM-M & BioE_COM-L	0	40.1625	0	0
UK	UKF1	UKF16	South Nottinghamshire	1.92308	9	0	0	0	100	0	100	0	100	1	0	0		15	13.3875	13.3875	13.3875	0	0	0	13.2536	13.2536	0	0	0		13.3875	100	100	100		100	0	13.3875	100
UK	UKF2	UKF21	Leicester	1.92308	9	0	0	0	0	0	0	0	0	1	0	0		0	0	0	0	0	0	0	0	0	0	0	0		0	100	100	100		0	0	0	0
UK	UKF2	UKF22	Leicestershire CC and Rutland	1.92308	9	0	0	0	0	0	0	0	0	1	0	0		45.0339	40.1928	40.1928	40.1928	40.1928	40.1928	40.1928	39.7909	39.7909	39.7909	39.7909	39.7909		40.1928	100	100	100	BioE_COM-S & BioE_COM-M & BioE_COM-L	0	40.1928	0	0
UK	UKF2	UKF24	West Northamptonshire	1.92308	9	0	0	0	0	0	0	0	0	1	0	0		60.119	53.6562	53.6562	53.6562	53.6562	53.6562	53.6562	53.1196	53.1196	53.1196	53.1196	53.1196		53.6562	100	100	100	BioE_COM-S & BioE_COM-M & BioE_COM-L	0	53.6562	0	0
UK	UKF2	UKF25	North Northamptonshire	1.92308	9	0	0	0	0	0	0	0	0	1	0	0		0	0	0	0	0	0	0	0	0	0	0	0		0	100	100	100		0	0	0	0
UK	UKF3	UKF30	Lincolnshire	1.92308	9	0	0	0.166113	100	0.166113	100	0.166113	100	1	0	0		60.39	53.8981	53.8981	53.8981	0	0	0	53.3591	53.3591	0	0	0		53.8981	100	100	100		100	0	53.8981	100
UK	UKG1	UKG11	Herefordshire, County Of	1.92308	9	0	0.166113	0.166113	0	0.166113	0	0.166113	0	1	4.98339	4.99168		7050.36	6292.44	6292.44	6281.99	6281.99	6281.99	6281.99	5919.08	5908.73	5908.73	5908.73	5908.73		6292.44	0	0	0	BioE_COM-S & BioE_COM-M & BioE_COM-L	0	6281.99	10.4526	0.166113
UK	UKG1	UKG12	Worcestershire	1.92308	9	0	0.166113	0.166113	0	0.166113	0	0.166113	0	1	4.98339	4.99168		1839.83	1642.05	1642.05	1639.32	1639.32	1639.32	1639.32	1544.62	1541.92	1541.92	1541.92	1541.92		1642.05	0	0	0	BioE_COM-S & BioE_COM-M & BioE_COM-L	0	1639.32	2.72766	0.166113
UK	UKG1	UKG13	Warwickshire	1.92308	9	0	0.166113	8.33333	0	8.33333	0	8.33333	0	1	4.98339	4.99168		165.616	147.812	147.812	147.567	135.495	135.495	135.495	139.042	138.799	127.444	127.444	127.444		147.812	0	0	0	BioE_COM-S & BioE_COM-M & BioE_COM-L	0	135.495	12.3177	8.33333
UK	UKG2	UKG21	Telford and Wrekin	1.92308	9	0	8.33333	8.33333	0	8.33333	0	8.33333	0	1	0	0		0	0	0	0	0	0	0	0	0	0	0	0		0	0	0	0		0	0	0	0
UK	UKG2	UKG22	Shropshire CC	1.92308	9	0	8.33333	8.33333	0	8.33333	0	8.33333	0	1	0	0		150	133.875	133.875	122.719	122.719	122.719	122.719	132.536	121.492	121.492	121.492	121.492		133.875	0	0	0	BioE_COM-S & BioE_COM-M & BioE_COM-L	0	122.719	11.1562	8.33333
UK	UKG2	UKG23	Stoke-on-Trent	1.92308	9	0	8.33333	8.33333	0	8.33333	0	8.33333	0	1	0	0		0	0	0	0	0	0	0	0	0	0	0	0		0	0	0	0		0	0	0	0
UK	UKG2	UKG24	Staffordshire CC	1.92308	9	0	8.33333	0	0	0	0	0	0	1	0	0		30	26.775	26.775	24.5438	26.775	26.775	26.775	26.5073	24.2983	26.5073	26.5073	26.5073		26.775	100	100	100	BioE_COM-S & BioE_COM-M & BioE_COM-L	0	26.775	0	0
UK	UKG3	UKG31	Birmingham	1.92308	9	0	0	0	0	0	0	0	0	1	0	0		0	0	0	0	0	0	0	0	0	0	0	0		0	100	100	100		0	0	0	0
UK	UKG3	UKG32	Solihull	1.92308	9	0	0	0	0	0	0	0	0	1	0	0		0	0	0	0	0	0	0	0	0	0	0	0		0	100	100	100		0	0	0	0
UK	UKG3	UKG33	Coventry	1.92308	9	0	0	0	0	0	0	0	0	1	0	0		0	0	0	0	0	0	0	0	0	0	0	0		0	100	100	100		0	0	0	0
UK	UKG3	UKG36	Dudley	1.92308	9	0	0	0	0	0	0	0	0	1	0	0		0	0	0	0	0	0	0	0	0	0	0	0		0	100	100	100		0	0	0	0
UK	UKG3	UKG37	Sandwell	1.92308	9	0	0	0	0	0	0	0	0	1	0	0		0	0	0	0	0	0	0	0	0	0	0	0		0	100	100	100		0	0	0	0
UK	UKG3	UKG38	Walsall	1.92308	9	0	0	0	0	0	0	0	0	1	0	0		0	0	0	0	0	0	0	0	0	0	0	0		0	100	100	100		0	0	0	0
UK	UKG3	UKG39	Wolverhampton	1.92308	9	0	0	0.555556	0	0.555556	0	0.555556	0	1	0	0		0	0	0	0	0	0	0	0	0	0	0	0		0	0	0	0		0	0	0	0
UK	UKH1	UKH11	Peterborough	1.92308	9	0	0.555556	0.555556	0	0.555556	0	0.555556	0	1	7.77778	7.82123		0	0	0	0	0	0	0	0	0	0	0	0		0	0	0	0		0	0	0	0
UK	UKH1	UKH12	Cambridgeshire CC	1.92308	9	0	0.555556	0.555556	0	0.555556	0	0.555556	0	1	7.77778	7.82123		1117.25	997.144	997.144	991.605	991.605	991.605	991.605	910.393	904.909	904.909	904.909	904.909		997.144	0	0	0	BioE_COM-S & BioE_COM-M & BioE_COM-L	0	991.605	5.53969	0.555556
UK	UKH1	UKH14	Suffolk	1.92308	9	0	0.555556	0	0	0	0	0	0	1	7.77778	7.82123		303.287	270.684	270.684	269.18	270.684	270.684	270.684	247.134	245.645	247.018	247.018	247.018		270.684	100	100	100	BioE_COM-S & BioE_COM-M & BioE_COM-L	0	270.684	0	0
UK	UKH1	UKH15	Norwich & East Norfolk	1.92308	9	0	0.555556	0.555556	0	0.555556	0	0.555556	0	1	7.77778	7.82123		295.814	264.014	264.014	262.547	262.547	262.547	262.547	241.045	239.593	239.593	239.593	239.593		264.014	0	0	0	BioE_COM-S & BioE_COM-M & BioE_COM-L	0	262.547	1.46674	0.555556
UK	UKH1	UKH16	Northß& West Norfolk	1.92308	9	0	0.555556	0.555556	0	0.555556	0	0.555556	0	1	7.77778	7.82123		295.044	263.327	263.327	261.864	261.864	261.864	261.864	240.418	238.969	238.969	238.969	238.969		263.327	0	0	0	BioE_COM-S & BioE_COM-M & BioE_COM-L	0	261.864	1.46293	0.555556
UK	UKH1	UKH17	Breckland & South Norfolk	1.92308	9	0	0.555556	0	0	0	0	0	0	1	7.77778	7.82123		755.782	674.536	674.536	670.788	674.536	674.536	674.536	615.851	612.141	615.561	615.561	615.561		674.536	100	100	100	BioE_COM-S & BioE_COM-M & BioE_COM-L	0	674.536	0	0
UK	UKH2	UKH21	Luton	1.92308	9	0	0	0	0	0	0	0	0	1	0	0		0	0	0	0	0	0	0	0	0	0	0	0		0	100	100	100		0	0	0	0
UK	UKH2	UKH23	Hertfordshire	1.92308	9	0	0	0	0	0	0	0	0	1	0	0		124.801	111.385	111.385	111.385	111.385	111.385	111.385	110.271	110.271	110.271	110.271	110.271		111.385	100	100	100	BioE_COM-S & BioE_COM-M & BioE_COM-L	0	111.385	0	0
UK	UKH2	UKH24	Bedford	1.92308	9	0	0	0	0	0	0	0	0	1	0	0		15.3601	13.7089	13.7089	13.7089	13.7089	13.7089	13.7089	13.5718	13.5718	13.5718	13.5718	13.5718		13.7089	100	100	100	BioE_COM-S & BioE_COM-M & BioE_COM-L	0	13.7089	0	0
UK	UKH2	UKH25	Central Bedfordshire	1.92308	9	0	0	0	0	0	0	0	0	1	0	0		15.3587	13.7076	13.7076	13.7076	13.7076	13.7076	13.7076	13.5706	13.5706	13.5706	13.5706	13.5706		13.7076	100	100	100	BioE_COM-S & BioE_COM-M & BioE_COM-L	0	13.7076	0	0
UK	UKH3	UKH31	Southend-On-Sea	1.92308	9	0	0	0	0	0	0	0	0	1	0	0		0	0	0	0	0	0	0	0	0	0	0	0		0	100	100	100		0	0	0	0
UK	UKH3	UKH32	Thurrock	1.92308	9	0	0	0	0	0	0	0	0	1	0	0		0	0	0	0	0	0	0	0	0	0	0	0		0	100	100	100		0	0	0	0
UK	UKH3	UKH34	Essex Haven Gateway	1.92308	9	0	0	0	0	0	0	0	0	1	0	0		195.862	174.807	174.807	174.807	174.807	174.807	174.807	173.059	173.059	173.059	173.059	173.059		174.807	100	100	100	BioE_COM-S & BioE_COM-M & BioE_COM-L	0	174.807	0	0
UK	UKH3	UKH35	West Essex	1.92308	9	0	0	0	0	0	0	0	0	1	0	0		193.167	172.401	172.401	172.401	172.401	172.401	172.401	170.677	170.677	170.677	170.677	170.677		172.401	100	100	100	BioE_COM-S & BioE_COM-M & BioE_COM-L	0	172.401	0	0
UK	UKH3	UKH36	Heart of Essex	1.92308	9	0	0	0	0	0	0	0	0	1	0	0		197.697	176.445	176.445	176.445	176.445	176.445	176.445	174.68	174.68	174.68	174.68	174.68		176.445	100	100	100	BioE_COM-S & BioE_COM-M & BioE_COM-L	0	176.445	0	0
UK	UKH3	UKH37	Essex Thames Gateway	1.92308	9	0	0	0	0	0	0	0	0	1	0	0		0	0	0	0	0	0	0	0	0	0	0	0		0	100	100	100		0	0	0	0
UK	UKI3	UKI31	Camden & City of London	1.92308	9	0	0	0	0	0	0	0	0	1	0	0		0	0	0	0	0	0	0	0	0	0	0	0		0	100	100	100		0	0	0	0
UK	UKI3	UKI32	Westminster	1.92308	9	0	0	0	0	0	0	0	0	1	0	0		0	0	0	0	0	0	0	0	0	0	0	0		0	100	100	100		0	0	0	0
UK	UKI3	UKI33	Kensington and Chelsea & Hammersmith and Fulham	1.92308	9	0	0	0	0	0	0	0	0	1	0	0		0	0	0	0	0	0	0	0	0	0	0	0		0	100	100	100		0	0	0	0
UK	UKI3	UKI34	Wandsworth	1.92308	9	0	0	0	0	0	0	0	0	1	0	0		0	0	0	0	0	0	0	0	0	0	0	0		0	100	100	100		0	0	0	0
UK	UKI4	UKI41	Hackney & Newham	1.92308	9	0	0	0	0	0	0	0	0	1	0	0		0	0	0	0	0	0	0	0	0	0	0	0		0	100	100	100		0	0	0	0
UK	UKI4	UKI42	Tower Hamlets	1.92308	9	0	0	0	0	0	0	0	0	1	0	0		0	0	0	0	0	0	0	0	0	0	0	0		0	100	100	100		0	0	0	0
UK	UKI4	UKI43	Haringey & Islington	1.92308	9	0	0	0	0	0	0	0	0	1	0	0		0	0	0	0	0	0	0	0	0	0	0	0		0	100	100	100		0	0	0	0
UK	UKI4	UKI44	Lewisham & Southwark	1.92308	9	0	0	0	0	0	0	0	0	1	0	0		0	0	0	0	0	0	0	0	0	0	0	0		0	100	100	100		0	0	0	0
UK	UKI4	UKI45	Lambeth	1.92308	9	0	0	0	0	0	0	0	0	1	0	0		0	0	0	0	0	0	0	0	0	0	0	0		0	100	100	100		0	0	0	0
UK	UKI5	UKI51	Bexley & Greenwich	1.92308	9	0	0	0	0	0	0	0	0	1	0	0		0	0	0	0	0	0	0	0	0	0	0	0		0	100	100	100		0	0	0	0
UK	UKI5	UKI52	Barking and Dagenham & Havering	1.92308	9	0	0	0	0	0	0	0	0	1	0	0		0	0	0	0	0	0	0	0	0	0	0	0		0	100	100	100		0	0	0	0
UK	UKI5	UKI53	Redbridge & Waltham Forest	1.92308	9	0	0	0	0	0	0	0	0	1	0	0		0	0	0	0	0	0	0	0	0	0	0	0		0	100	100	100		0	0	0	0
UK	UKI5	UKI54	Enfield	1.92308	9	0	0	0	0	0	0	0	0	1	0	0		0	0	0	0	0	0	0	0	0	0	0	0		0	100	100	100		0	0	0	0
UK	UKI6	UKI61	Bromley	1.92308	9	0	0	0	0	0	0	0	0	1	0	0		0	0	0	0	0	0	0	0	0	0	0	0		0	100	100	100		0	0	0	0
UK	UKI6	UKI62	Croydon	1.92308	9	0	0	0	0	0	0	0	0	1	0	0		0	0	0	0	0	0	0	0	0	0	0	0		0	100	100	100		0	0	0	0
UK	UKI6	UKI63	Merton, Kingston Upon Thames & Sutton	1.92308	9	0	0	0	0	0	0	0	0	1	0	0		0	0	0	0	0	0	0	0	0	0	0	0		0	100	100	100		0	0	0	0
UK	UKI7	UKI71	Barnet	1.92308	9	0	0	0	0	0	0	0	0	1	0	0		0	0	0	0	0	0	0	0	0	0	0	0		0	100	100	100		0	0	0	0
UK	UKI7	UKI72	Brent	1.92308	9	0	0	0	0	0	0	0	0	1	0	0		0	0	0	0	0	0	0	0	0	0	0	0		0	100	100	100		0	0	0	0
UK	UKI7	UKI73	Ealing	1.92308	9	0	0	0	0	0	0	0	0	1	0	0		0	0	0	0	0	0	0	0	0	0	0	0		0	100	100	100		0	0	0	0
UK	UKI7	UKI74	Harrow & Hillingdon	1.92308	9	0	0	0	0	0	0	0	0	1	0	0		0	0	0	0	0	0	0	0	0	0	0	0		0	100	100	100		0	0	0	0
UK	UKI7	UKI75	Hounslow & Richmond Upon Thames	1.92308	9	0	0	0	0	0	0	0	0	1	0	0		0	0	0	0	0	0	0	0	0	0	0	0		0	100	100	100		0	0	0	0
UK	UKJ1	UKJ11	Berkshire	1.92308	9	0	0	0	0	0	0	0	0	1	0	0		46.3583	41.3748	41.3748	41.3748	41.3748	41.3748	41.3748	40.961	40.961	40.961	40.961	40.961		41.3748	100	100	100	BioE_COM-S & BioE_COM-M & BioE_COM-L	0	41.3748	0	0
UK	UKJ1	UKJ12	Milton Keynes	1.92308	9	0	0	0	0	0	0	0	0	1	0	0		0	0	0	0	0	0	0	0	0	0	0	0		0	100	100	100		0	0	0	0
UK	UKJ1	UKJ13	Buckinghamshire CC	1.92308	9	0	0	0	0	0	0	0	0	1	0	0		45.8813	40.949	40.949	40.949	40.949	40.949	40.949	40.5395	40.5395	40.5395	40.5395	40.5395		40.949	100	100	100	BioE_COM-S & BioE_COM-M & BioE_COM-L	0	40.949	0	0
UK	UKJ1	UKJ14	Oxfordshire	1.92308	9	0	0	0	0	0	0	0	0	1	0	0		0	0	0	0	0	0	0	0	0	0	0	0		0	100	100	100		0	0	0	0
UK	UKJ2	UKJ21	Brighton and Hove	1.92308	9	0	0	0	0	0	0	0	0	1	17.1053	17.1053		62.4951	55.7769	55.7769	55.7769	55.7769	55.7769	55.7769	45.7738	45.7738	45.7738	45.7738	45.7738		55.7769	100	100	100	BioE_COM-S & BioE_COM-M & BioE_COM-L	0	55.7769	0	0
UK	UKJ2	UKJ22	East Sussex CC	1.92308	9	0	0	0	0	0	0	0	0	1	17.1053	17.1053		188.92	168.611	168.611	168.611	168.611	168.611	168.611	138.372	138.372	138.372	138.372	138.372		168.611	100	100	100	BioE_COM-S & BioE_COM-M & BioE_COM-L	0	168.611	0	0
UK	UKJ2	UKJ25	West Surrey	1.92308	9	0	0	0	0	0	0	0	0	1	17.1053	17.1053		0	0	0	0	0	0	0	0	0	0	0	0		0	100	100	100		0	0	0	0
UK	UKJ2	UKJ26	East Surrey	1.92308	9	0	0	0	0	0	0	0	0	1	17.1053	17.1053		908.36	810.711	810.711	810.711	810.711	810.711	810.711	665.317	665.317	665.317	665.317	665.317		810.711	100	100	100	BioE_COM-S & BioE_COM-M & BioE_COM-L	0	810.711	0	0
UK	UKJ2	UKJ27	West Sussex (South West)	1.92308	9	0	0	0	41.8605	0	100	0	100	1	17.1053	17.1053		78.259	69.8462	69.8462	69.8462	40.6082	0	0	57.3198	57.3198	33.3255	0	0		69.8462	100	100	100	BioE_COM-S	41.8605	40.6082	29.2379	41.8605
UK	UKJ2	UKJ28	West Sussex (North East)	1.92308	9	0	0	0	0	0	0	0	0	1	17.1053	17.1053		204.224	182.27	182.27	182.27	182.27	182.27	182.27	149.581	149.581	149.581	149.581	149.581		182.27	100	100	100	BioE_COM-S & BioE_COM-M & BioE_COM-L	0	182.27	0	0
UK	UKJ3	UKJ31	Portsmouth	1.92308	9	0	0	0	0	0	0	0	0	1	0	0		0	0	0	0	0	0	0	0	0	0	0	0		0	100	100	100		0	0	0	0
UK	UKJ3	UKJ32	Southampton	1.92308	9	0	0	0	0	0	0	0	0	1	0	0		0	0	0	0	0	0	0	0	0	0	0	0		0	100	100	100		0	0	0	0
UK	UKJ3	UKJ34	Isle of Wight	1.92308	9	0	0	0.111359	100	0.111359	100	0.111359	100	1	0	0		116.714	104.167	104.167	104.167	0	0	0	103.126	103.126	0	0	0		104.167	100	100	100		100	0	104.167	100
UK	UKJ3	UKJ35	South Hampshire	1.92308	9	0	0	0	0	0	0	0	0	1	0	0		123.484	110.21	110.21	110.21	110.21	110.21	110.21	109.107	109.107	109.107	109.107	109.107		110.21	100	100	100	BioE_COM-S & BioE_COM-M & BioE_COM-L	0	110.21	0	0
UK	UKJ3	UKJ36	Central Hampshire	1.92308	9	0	0	0	100	0	100	0	100	1	0	0		118.978	106.188	106.188	106.188	0	0	0	105.126	105.126	0	0	0		106.188	100	100	100		100	0	106.188	100
UK	UKJ3	UKJ37	North Hampshire	1.92308	9	0	0	0.111359	0	0.111359	0	0.111359	0	1	0	0		118.326	105.606	105.606	105.606	105.488	105.488	105.488	104.55	104.55	104.433	104.433	104.433		105.606	0	0	0	BioE_COM-S & BioE_COM-M & BioE_COM-L	0	105.488	0.117601	0.111359
UK	UKJ4	UKJ41	Medway	1.92308	9	0	0.111359	1.04167	0	1.04167	0	1.04167	0	1	4.5657	4.57079		33.3062	29.7258	29.7258	29.6927	29.4162	29.4162	29.4162	28.0849	28.0522	27.7909	27.7909	27.7909		29.7258	0	0	0	BioE_COM-S & BioE_COM-M & BioE_COM-L	0	29.4162	0.309644	1.04167
UK	UKJ4	UKJ43	Kent Thames Gateway	1.92308	9	0	0.111359	0.111359	0	0.111359	0	0.111359	0	1	4.5657	4.57079		377.827	337.21	337.21	336.835	336.835	336.835	336.835	318.596	318.224	318.224	318.224	318.224		337.21	0	0	0	BioE_COM-S & BioE_COM-M & BioE_COM-L	0	336.835	0.375513	0.111359
UK	UKJ4	UKJ44	East Kent	1.92308	9	0	0.111359	0.111359	0	0.111359	0	0.111359	0	1	4.5657	4.57079		4779.2	4265.44	4265.44	4260.69	4260.69	4260.69	4260.69	4029.98	4025.28	4025.28	4025.28	4025.28		4265.44	0	0	0	BioE_COM-S & BioE_COM-M & BioE_COM-L	0	4260.69	4.74993	0.111359
UK	UKJ4	UKJ45	Mid Kent	1.92308	9	0	0.111359	0.111359	0	0.111359	0	0.111359	0	1	4.5657	4.57079		4717.76	4210.6	4210.6	4205.91	4205.91	4205.91	4205.91	3978.17	3973.53	3973.53	3973.53	3973.53		4210.6	0	0	0	BioE_COM-S & BioE_COM-M & BioE_COM-L	0	4205.91	4.68886	0.111359
UK	UKJ4	UKJ46	West Kent	1.92308	9	0	0.111359	3.55987	0	3.55987	0	3.55987	0	1	4.5657	4.57079		4573.54	4081.88	4081.88	4077.34	3936.57	3936.57	3936.57	3856.56	3852.06	3719.07	3719.07	3719.07		4081.88	0	0	0	BioE_COM-S & BioE_COM-M & BioE_COM-L	0	3936.57	145.31	3.55987
UK	UKK1	UKK11	Bristol, City Of	1.92308	9	0	1.04167	1.04167	0	1.04167	0	1.04167	0	1	2.08333	2.10526		0	0	0	0	0	0	0	0	0	0	0	0		0	0	0	0		0	0	0	0
UK	UKK1	UKK12	Bath and North East Somerset, North Somerset and South Gloucestershire	1.92308	9	0	1.04167	1.04167	0	1.04167	0	1.04167	0	1	2.08333	2.10526		330.697	295.147	295.147	292.072	292.072	292.072	292.072	286.108	283.064	283.064	283.064	283.064		295.147	0	0	0	BioE_COM-S & BioE_COM-M & BioE_COM-L	0	292.072	3.07445	1.04167
UK	UKK1	UKK13	Gloucestershire	1.92308	9	0	1.04167	1.04167	0	1.04167	0	1.04167	0	1	2.08333	2.10526		1088.19	971.214	971.214	961.097	961.097	961.097	961.097	941.47	931.454	931.454	931.454	931.454		971.214	0	0	0	BioE_COM-S & BioE_COM-M & BioE_COM-L	0	961.097	10.1168	1.04167
UK	UKK1	UKK14	Swindon	1.92308	9	0	1.04167	1.04167	0	1.04167	0	1.04167	0	1	2.08333	2.10526		0	0	0	0	0	0	0	0	0	0	0	0		0	0	0	0		0	0	0	0
UK	UKK1	UKK15	Wiltshire CC	1.92308	9	0	1.04167	0.819672	0	0.819672	0	0.819672	0	1	2.08333	2.10526		45.819	40.8935	40.8935	40.4675	40.5583	40.5583	40.5583	39.6411	39.2194	39.3074	39.3074	39.3074		40.8935	0	0	0	BioE_COM-S & BioE_COM-M & BioE_COM-L	0	40.5583	0.335192	0.819672
UK	UKK2	UKK21	Bournemouth and Poole	1.92308	9	0	0.819672	0.819672	0	0.819672	0	0.819672	0	1	4.91803	4.95868		0	0	0	0	0	0	0	0	0	0	0	0		0	0	0	0		0	0	0	0
UK	UKK2	UKK22	Dorset CC	1.92308	9	0	0.819672	0.819672	0	0.819672	0	0.819672	0	1	4.91803	4.95868		286.226	255.457	255.457	253.363	253.363	253.363	253.363	240.464	238.391	238.391	238.391	238.391		255.457	0	0	0	BioE_COM-S & BioE_COM-M & BioE_COM-L	0	253.363	2.09391	0.819672
UK	UKK2	UKK23	Somerset	1.92308	9	0	0.819672	0	0	0	100	0	100	1	4.91803	4.95868		1545.35	1379.23	1379.23	1367.92	1379.23	0	0	1298.28	1287.09	1297.73	0	0		1379.23	100	100	100	BioE_COM-S	0	1379.23	0	0
UK	UKK3	UKK30	Cornwall and Isles of Scilly	1.92308	9	0	0	1.44928	0	1.44928	0	1.44928	0	1	7.14286	7.14286		210	187.425	187.425	187.425	184.709	184.709	184.709	172.297	172.297	169.8	169.8	169.8		187.425	0	0	0	BioE_COM-S & BioE_COM-M & BioE_COM-L	0	184.709	2.7163	1.44928
UK	UKK4	UKK41	Plymouth	1.92308	9	0	1.44928	1.44928	0	1.44928	0	1.44928	0	1	11.5942	11.7647		0	0	0	0	0	0	0	0	0	0	0	0		0	0	0	0		0	0	0	0
UK	UKK4	UKK42	Torbay	1.92308	9	0	1.44928	1.44928	0	1.44928	0	1.44928	0	1	11.5942	11.7647		0	0	0	0	0	0	0	0	0	0	0	0		0	0	0	0		0	0	0	0
UK	UKK4	UKK43	Devon CC	1.92308	9	0	1.44928	0	0	0	0	0	0	1	11.5942	11.7647		1020	910.35	910.35	897.157	910.35	910.35	910.35	796.754	783.693	795.218	795.218	795.218		910.35	100	100	100	BioE_COM-S & BioE_COM-M & BioE_COM-L	0	910.35	0	0
UK	UKL1	UKL11	Isle of Anglesey	1.92308	9	0	0	0	100	0	100	0	100	1	14.2857	14.2857		15	13.3875	13.3875	13.3875	0	0	0	11.3603	11.3603	0	0	0		13.3875	100	100	100		100	0	13.3875	100
UK	UKL1	UKL12	Gwynedd	1.92308	9	0	0	0	0	0	0	0	0	1	14.2857	14.2857		0	0	0	0	0	0	0	0	0	0	0	0		0	100	100	100		0	0	0	0
UK	UKL1	UKL13	Conwy and Denbighshire	1.92308	9	0	0	0	0	0	0	0	0	1	14.2857	14.2857		0	0	0	0	0	0	0	0	0	0	0	0		0	100	100	100		0	0	0	0
UK	UKL1	UKL14	South West Wales	1.92308	9	0	0	0	0	0	0	0	0	1	14.2857	14.2857		75	66.9375	66.9375	66.9375	66.9375	66.9375	66.9375	56.8013	56.8013	56.8013	56.8013	56.8013		66.9375	100	100	100	BioE_COM-S & BioE_COM-M & BioE_COM-L	0	66.9375	0	0
UK	UKL1	UKL15	Central Valleys	1.92308	9	0	0	0	0	0	0	0	0	1	14.2857	14.2857		0	0	0	0	0	0	0	0	0	0	0	0		0	100	100	100		0	0	0	0
UK	UKL1	UKL16	Gwent Valleys	1.92308	9	0	0	0	0	0	0	0	0	1	14.2857	14.2857		0	0	0	0	0	0	0	0	0	0	0	0		0	100	100	100		0	0	0	0
UK	UKL1	UKL17	Bridgend and Neath Port Talbot	1.92308	9	0	0	0	0	0	0	0	0	1	14.2857	14.2857		0	0	0	0	0	0	0	0	0	0	0	0		0	100	100	100		0	0	0	0
UK	UKL1	UKL18	Swansea	1.92308	9	0	0	0	0	0	0	0	0	1	14.2857	14.2857		0	0	0	0	0	0	0	0	0	0	0	0		0	100	100	100		0	0	0	0
UK	UKL2	UKL21	Monmouthshire and Newport	1.92308	9	0	0	0	0	0	0	0	0	1	0	0		450	401.625	401.625	401.625	401.625	401.625	401.625	397.609	397.609	397.609	397.609	397.609		401.625	100	100	100	BioE_COM-S & BioE_COM-M & BioE_COM-L	0	401.625	0	0
UK	UKL2	UKL22	Cardiff and Vale of Glamorgan	1.92308	9	0	0	0	0	0	0	0	0	1	0	0		0	0	0	0	0	0	0	0	0	0	0	0		0	100	100	100		0	0	0	0
UK	UKL2	UKL23	Flintshire and Wrexham	1.92308	9	0	0	0	0	0	0	0	0	1	0	0		15	13.3875	13.3875	13.3875	13.3875	13.3875	13.3875	13.2536	13.2536	13.2536	13.2536	13.2536		13.3875	100	100	100	BioE_COM-S & BioE_COM-M & BioE_COM-L	0	13.3875	0	0
UK	UKL2	UKL24	Powys	1.92308	9	0	0	0	0	0	0	0	0	1	0	0		60	53.55	53.55	53.55	53.55	53.55	53.55	53.0145	53.0145	53.0145	53.0145	53.0145		53.55	100	100	100	BioE_COM-S & BioE_COM-M & BioE_COM-L	0	53.55	0	0
UK	UKM2	UKM21	Angus and Dundee City	1.92308	9	0	0	0	0	0	0	0	0	1	0	0		0	0	0	0	0	0	0	0	0	0	0	0		0	100	100	100		0	0	0	0
UK	UKM2	UKM22	Clackmannanshire and Fife	1.92308	9	0	0	0	0	0	0	0	0	1	0	0		0	0	0	0	0	0	0	0	0	0	0	0		0	100	100	100		0	0	0	0
UK	UKM2	UKM23	East Lothian and Midlothian	1.92308	9	0	0	0	0	0	0	0	0	1	0	0		0	0	0	0	0	0	0	0	0	0	0	0		0	100	100	100		0	0	0	0
UK	UKM2	UKM24	Scottish Borders	1.92308	9	0	0	0	0	0	0	0	0	1	0	0		0	0	0	0	0	0	0	0	0	0	0	0		0	100	100	100		0	0	0	0
UK	UKM2	UKM25	Edinburgh, City Of	1.92308	9	0	0	0	0	0	0	0	0	1	0	0		0	0	0	0	0	0	0	0	0	0	0	0		0	100	100	100		0	0	0	0
UK	UKM2	UKM26	Falkirk	1.92308	9	0	0	0	0	0	0	0	0	1	0	0		0	0	0	0	0	0	0	0	0	0	0	0		0	100	100	100		0	0	0	0
UK	UKM2	UKM27	Perth & Kinross and Stirling	1.92308	9	0	0	0	0	0	0	0	0	1	0	0		0	0	0	0	0	0	0	0	0	0	0	0		0	100	100	100		0	0	0	0
UK	UKM2	UKM28	West Lothian	1.92308	9	0	0	0	0	0	0	0	0	1	0	0		0	0	0	0	0	0	0	0	0	0	0	0		0	100	100	100		0	0	0	0
UK	UKM3	UKM31	East Dunbartonshire, West Dunbartonshire and Helensburgh & Lomond	1.92308	9	0	0	0	0	0	0	0	0	1	0	0		0	0	0	0	0	0	0	0	0	0	0	0		0	100	100	100		0	0	0	0
UK	UKM3	UKM32	Dumfries & Galloway	1.92308	9	0	0	0	0	0	0	0	0	1	0	0		0	0	0	0	0	0	0	0	0	0	0	0		0	100	100	100		0	0	0	0
UK	UKM3	UKM33	East Ayrshire and North Ayrshire Mainland	1.92308	9	0	0	0	0	0	0	0	0	1	0	0		0	0	0	0	0	0	0	0	0	0	0	0		0	100	100	100		0	0	0	0
UK	UKM3	UKM34	Glasgow City	1.92308	9	0	0	0	0	0	0	0	0	1	0	0		0	0	0	0	0	0	0	0	0	0	0	0		0	100	100	100		0	0	0	0
UK	UKM3	UKM35	Inverclyde, East Renfrewshire and Renfrewshire	1.92308	9	0	0	0	0	0	0	0	0	1	0	0		0	0	0	0	0	0	0	0	0	0	0	0		0	100	100	100		0	0	0	0
UK	UKM3	UKM36	North Lanarkshire	1.92308	9	0	0	0	0	0	0	0	0	1	0	0		0	0	0	0	0	0	0	0	0	0	0	0		0	100	100	100		0	0	0	0
UK	UKM3	UKM37	South Ayrshire	1.92308	9	0	0	0	0	0	0	0	0	1	0	0		0	0	0	0	0	0	0	0	0	0	0	0		0	100	100	100		0	0	0	0
UK	UKM3	UKM38	South Lanarkshire	1.92308	9	0	0	0	0	0	0	0	0	1	0	0		15	13.3875	13.3875	13.3875	13.3875	13.3875	13.3875	13.2536	13.2536	13.2536	13.2536	13.2536		13.3875	100	100	100	BioE_COM-S & BioE_COM-M & BioE_COM-L	0	13.3875	0	0
UK	UKM5	UKM50	Aberdeen City and Aberdeenshire	1.92308	9	0	0	0	0	0	0	0	0	1	0	0		0	0	0	0	0	0	0	0	0	0	0	0		0	100	100	100		0	0	0	0
UK	UKM6	UKM61	Caithness & Sutherland and Ross & Cromarty	1.92308	9	0	0	0	0	0	0	0	0	1	0	0		0	0	0	0	0	0	0	0	0	0	0	0		0	100	100	100		0	0	0	0
UK	UKM6	UKM62	Inverness & Nairn and Moray, Badenoch & Strathspey	1.92308	9	0	0	0	0	0	0	0	0	1	0	0		0	0	0	0	0	0	0	0	0	0	0	0		0	100	100	100		0	0	0	0
UK	UKM6	UKM63	Lochaber, Skye & Lochalsh, Arran & Cumbrae and Argyll & Bute	1.92308	9	0	0	0	0	0	0	0	0	1	0	0		0	0	0	0	0	0	0	0	0	0	0	0		0	100	100	100		0	0	0	0
UK	UKM6	UKM64	Eilean Siar (Western Isles)	1.92308	9	0	0	0	0	0	0	0	0	1	0	0		0	0	0	0	0	0	0	0	0	0	0	0		0	100	100	100		0	0	0	0
UK	UKM6	UKM65	Orkney Islands	1.92308	9	0	0	0	0	0	0	0	0	1	0	0		0	0	0	0	0	0	0	0	0	0	0	0		0	100	100	100		0	0	0	0
UK	UKM6	UKM66	Shetland Islands	1.92308	9	0	0	0.657895	0	0.657895	0	0.657895	0	1	0	0		0	0	0	0	0	0	0	0	0	0	0	0		0	0	0	0		0	0	0	0
UK	UKN0	UKN01	Belfast	1.92308	9	0	0.657895	0.657895	0	0.657895	0	0.657895	0	1	0	0		0	0	0	0	0	0	0	0	0	0	0	0		0	0	0	0		0	0	0	0
UK	UKN0	UKN02	Outer Belfast	1.92308	9	0	0.657895	0.657895	0	0.657895	0	0.657895	0	1	0	0		0	0	0	0	0	0	0	0	0	0	0	0		0	0	0	0		0	0	0	0
UK	UKN0	UKN03	East of Northern Ireland	1.92308	9	0	0.657895	0.657895	0	0.657895	0	0.657895	0	1	0	0		0	0	0	0	0	0	0	0	0	0	0	0		0	0	0	0		0	0	0	0
UK	UKN0	UKN04	North of Northern Ireland	1.92308	9	0	0.657895	0.657895	0	0.657895	0	0.657895	0	1	0	0		0	0	0	0	0	0	0	0	0	0	0	0		0	0	0	0		0	0	0	0
UK	UKN0	UKN05	West and South of Northern Ireland	1.92308	9	0	0.657895	7.56869	0	7.56869	0	7.56869	0	1	0	0		0	0	0	0	0	0	0	0	0	0	0	0		0	0	0	0		0	0	0	0

## Sheet: DRYFRUITS
DRY FRUITS				CRT_SLOPE	CRT_LOSS	CRE_WASTE	CRE_SELF	CRE_>2ha	CRE_COM-S	CRE_>2ha	CRE_COM-M	CRE_>2ha	CRE_COM-L	CRI_COMP	CRI_>0ha	CRI_>2ha		BioTH	BioT	BioE_WASTE	BioE_SELF	BioE_COM-S	BioE_COM-M	BioE_COM-L	BioI_WASTE	BioI_SELF	BioI_COM-S	BioI_COM-M	BioI_COM-L		BioT	CRE_COM			Best economic case	CR BEST Economic	BioE_COM_BEST	GAP = BioT - BioE_COM_BEST
Country	NUTs2	NUTs3	NAME	(%)	(%)	(%)	(%)	(%)	(%)	(%)	(%)	(%)	(%)	(%)	(%)	(%)		t DM·yr-1	t DM·yr-1	t DM·yr-1	t DM·yr-1	t DM·yr-1	t DM·yr-1	t DM·yr-1	t DM·yr-1	t DM·yr-1	t DM·yr-1	t DM·yr-1	t DM·yr-1		(DM t)	S	M	L		(%)	(DM t)	(DM t)	(%)
AT	AT11	AT111	Mittelburgenland	0	10	0	0	0	45.5161	0	100	0	100	0	0	0		0	0	0	0	0	0	0	0	0	0	0	0		0	100	100	100		0	0	0	0
AT	AT11	AT112	Nordburgenland	0	10	0	0	0	26.2828	0	68.404	0	75.5152	0	0	0		0	0	0	0	0	0	0	0	0	0	0	0		0	100	100	100		0	0	0	0
AT	AT11	AT113	Sudburgenland	0	10	0	0	0	100	0	100	0	100	0	0	0		0	0	0	0	0	0	0	0	0	0	0	0		0	100	100	100		0	0	0	0
AT	AT12	AT121	Mostviertel-Eisenwurzen	0	10	0	0	0	0	0	0	0	0	0	0	0		0	0	0	0	0	0	0	0	0	0	0	0		0	100	100	100		0	0	0	0
AT	AT12	AT122	Niederosterreich-Sud	0	10	0	0	0	100	0	100	0	100	0	0	0		0	0	0	0	0	0	0	0	0	0	0	0		0	100	100	100		0	0	0	0
AT	AT12	AT123	Sankt Polten	0	10	0	0	0	71.3514	0	100	0	32.973	0	0	0		0	0	0	0	0	0	0	0	0	0	0	0		0	100	100	100		0	0	0	0
AT	AT12	AT124	Waldviertel	0.0807754	10	0	0	0	13.6914	0	24.6769	0	19.9919	0	0	0		0	0	0	0	0	0	0	0	0	0	0	0		0	100	100	100		0	0	0	0
AT	AT12	AT125	Weinviertel	0	10	0	0	0	29.7019	0	85.492	0	98.9712	0	0	0		0	0	0	0	0	0	0	0	0	0	0	0		0	100	100	100		0	0	0	0
AT	AT12	AT126	Wiener Umland/Nordteil	0	10	0	0	0	44.1387	0	99.945	0	88.1673	0	0	0		0	0	0	0	0	0	0	0	0	0	0	0		0	100	100	100		0	0	0	0
AT	AT12	AT127	Wiener Umland/Sudteil	0	10	0	0	0	62.8445	0	100	0	100	0	0	0		0	0	0	0	0	0	0	0	0	0	0	0		0	100	100	100		0	0	0	0
AT	AT13	AT130	Wien	0	10	0	0	0	100	0	100	0	100	0	0	0		0	0	0	0	0	0	0	0	0	0	0	0		0	100	100	100		0	0	0	0
AT	AT21	AT211	Klagenfurt-Villach	0	10	0	0	0	0	0	0	0	0	0	0	0		0	0	0	0	0	0	0	0	0	0	0	0		0	100	100	100		0	0	0	0
AT	AT21	AT212	Oberkarnten	0	10	0	0	0	0	0	0	0	0	0	0	0		0	0	0	0	0	0	0	0	0	0	0	0		0	100	100	100		0	0	0	0
AT	AT21	AT213	Unterkarnten	0	10	0	0	0	0	0	0	0	0	0	0	0		0	0	0	0	0	0	0	0	0	0	0	0		0	100	100	100		0	0	0	0
AT	AT22	AT221	Graz	0	10	0	0	0	0	0	0	0	0	0	0	0		0	0	0	0	0	0	0	0	0	0	0	0		0	100	100	100		0	0	0	0
AT	AT22	AT222	Liezen	0	10	0	0	0	0	0	0	0	0	0	0	0		0	0	0	0	0	0	0	0	0	0	0	0		0	100	100	100		0	0	0	0
AT	AT22	AT223	Ostliche Obersteiermark	0	10	0	0	0	0	0	0	0	0	0	0	0		0	0	0	0	0	0	0	0	0	0	0	0		0	100	100	100		0	0	0	0
AT	AT22	AT224	Oststeiermark	0	10	0	0	0	86.5248	0	100	0	100	0	0	0		0	0	0	0	0	0	0	0	0	0	0	0		0	100	100	100		0	0	0	0
AT	AT22	AT225	West- und Sudsteiermark	0	10	0	0	0	22.2222	0	99.7222	0	100	0	0	0		0	0	0	0	0	0	0	0	0	0	0	0		0	100	100	100		0	0	0	0
AT	AT22	AT226	Westliche Obersteiermark	0	10	0	0	0	0	0	0	0	0	0	0	0		0	0	0	0	0	0	0	0	0	0	0	0		0	100	100	100		0	0	0	0
AT	AT31	AT311	Innviertel	0	10	0	0	0	0	0	0	0	0	0	0	0		0	0	0	0	0	0	0	0	0	0	0	0		0	100	100	100		0	0	0	0
AT	AT31	AT312	Linz-Wels	0	10	0	0	0	0	0	0	0	0	0	0	0		0	0	0	0	0	0	0	0	0	0	0	0		0	100	100	100		0	0	0	0
AT	AT31	AT313	Muhlviertel	0	10	0	0	0	0	0	0	0	0	0	0	0		0	0	0	0	0	0	0	0	0	0	0	0		0	100	100	100		0	0	0	0
AT	AT31	AT314	Steyr-Kirchdorf	0	10	0	0	0	0	0	0	0	0	0	0	0		0	0	0	0	0	0	0	0	0	0	0	0		0	100	100	100		0	0	0	0
AT	AT31	AT315	Traunviertel	0	10	0	0	0	0	0	0	0	0	0	0	0		0	0	0	0	0	0	0	0	0	0	0	0		0	100	100	100		0	0	0	0
AT	AT32	AT321	Lungau	0	10	0	0	0	0	0	0	0	0	0	0	0		0	0	0	0	0	0	0	0	0	0	0	0		0	100	100	100		0	0	0	0
AT	AT32	AT322	Pinzgau-Pongau	0	10	0	0	0	0	0	0	0	0	0	0	0		0	0	0	0	0	0	0	0	0	0	0	0		0	100	100	100		0	0	0	0
AT	AT32	AT323	Salzburg Und Umgebung	0	10	0	0	0	0	0	0	0	0	0	0	0		0	0	0	0	0	0	0	0	0	0	0	0		0	100	100	100		0	0	0	0
AT	AT33	AT331	Ausserfern	0	10	0	0	0	0	0	0	0	0	0	0	0		0	0	0	0	0	0	0	0	0	0	0	0		0	100	100	100		0	0	0	0
AT	AT33	AT332	Innsbruck	0	10	0	0	0	0	0	0	0	0	0	0	0		0	0	0	0	0	0	0	0	0	0	0	0		0	100	100	100		0	0	0	0
AT	AT33	AT333	Osttirol	0	10	0	0	0	0	0	0	0	0	0	0	0		0	0	0	0	0	0	0	0	0	0	0	0		0	100	100	100		0	0	0	0
AT	AT33	AT334	Tiroler Oberland	0	10	0	0	0	0	0	0	0	0	0	0	0		0	0	0	0	0	0	0	0	0	0	0	0		0	100	100	100		0	0	0	0
AT	AT33	AT335	Tiroler Unterland	0	10	0	0	0	0	0	0	0	0	0	0	0		0	0	0	0	0	0	0	0	0	0	0	0		0	100	100	100		0	0	0	0
AT	AT34	AT341	Bludenz-Bregenzer Wald	0	10	0	0	0	0	0	0	0	0	0	0	0		0	0	0	0	0	0	0	0	0	0	0	0		0	100	100	100		0	0	0	0
AT	AT34	AT342	Rheintal-Bodenseegebiet	0	10	0	0	0	0	0	0	0	0	0	0	0		0	0	0	0	0	0	0	0	0	0	0	0		0	100	100	100		0	0	0	0
BE	BE10	BE100	Arr. de Bruxelles-Capitale / Arr. van Brussel-Hoofdstad	0	10	0	0	0	0	0	0	0	0	0	0	0		0	0	0	0	0	0	0	0	0	0	0	0		0	100	100	100		0	0	0	0
BE	BE21	BE211	Arr. Antwerpen	0	10	0	0	0	100	0	100	0	100	0	0	0		0	0	0	0	0	0	0	0	0	0	0	0		0	100	100	100		0	0	0	0
BE	BE21	BE212	Arr. Mechelen	0	10	0	0	0	0	0	0	0	0	0	0	0		0	0	0	0	0	0	0	0	0	0	0	0		0	100	100	100		0	0	0	0
BE	BE21	BE213	Arr. Turnhout	0	10	0	0	0	100	0	100	0	100	0	0	0		0	0	0	0	0	0	0	0	0	0	0	0		0	100	100	100		0	0	0	0
BE	BE22	BE221	Arr. Hasselt	0	10	0	0	0	1.58151	0	0.364964	0	0	0	0	0		0	0	0	0	0	0	0	0	0	0	0	0		0	100	100	100		0	0	0	0
BE	BE22	BE222	Arr. Maaseik	0	10	0	0	0	100	0	100	0	100	0	0	0		0	0	0	0	0	0	0	0	0	0	0	0		0	100	100	100		0	0	0	0
BE	BE22	BE223	Arr. Tongeren	0	10	0	0	0	4.77941	0	3.49265	0	2.02206	0	0	0		0	0	0	0	0	0	0	0	0	0	0	0		0	100	100	100		0	0	0	0
BE	BE23	BE231	Arr. Aalst	0	10	0	0	0	100	0	100	0	100	0	0	0		0	0	0	0	0	0	0	0	0	0	0	0		0	100	100	100		0	0	0	0
BE	BE23	BE232	Arr. Dendermonde	0	10	0	0	0	100	0	100	0	100	0	0	0		0	0	0	0	0	0	0	0	0	0	0	0		0	100	100	100		0	0	0	0
BE	BE23	BE233	Arr. Eeklo	0	10	0	0	0	100	0	100	0	100	0	0	0		0	0	0	0	0	0	0	0	0	0	0	0		0	100	100	100		0	0	0	0
BE	BE23	BE234	Arr. Gent	0	10	0	0	0	0	0	0	0	0	0	0	0		0	0	0	0	0	0	0	0	0	0	0	0		0	100	100	100		0	0	0	0
BE	BE23	BE235	Arr. Oudenaarde	0	10	0	0	0	0	0	0	0	0	0	0	0		0	0	0	0	0	0	0	0	0	0	0	0		0	100	100	100		0	0	0	0
BE	BE23	BE236	Arr. Sint-Niklaas	0	10	0	0	0	100	0	100	0	100	0	0	0		0	0	0	0	0	0	0	0	0	0	0	0		0	100	100	100		0	0	0	0
BE	BE24	BE241	Arr. Halle-Vilvoorde	0	10	0	0	0	0	0	0	0	0	0	0	0		0	0	0	0	0	0	0	0	0	0	0	0		0	100	100	100		0	0	0	0
BE	BE24	BE242	Arr. Leuven	0	10	0	0	0	12.2449	0	12.5	0	17.602	0	0	0		0	0	0	0	0	0	0	0	0	0	0	0		0	100	100	100		0	0	0	0
BE	BE25	BE251	Arr. Brugge	0	10	0	0	0	100	0	100	0	100	0	0	0		0	0	0	0	0	0	0	0	0	0	0	0		0	100	100	100		0	0	0	0
BE	BE25	BE252	Arr. Diksmuide	0	10	0	0	0	100	0	100	0	100	0	0	0		0	0	0	0	0	0	0	0	0	0	0	0		0	100	100	100		0	0	0	0
BE	BE25	BE253	Arr. Ieper	0	10	0	0	0	100	0	100	0	100	0	0	0		0	0	0	0	0	0	0	0	0	0	0	0		0	100	100	100		0	0	0	0
BE	BE25	BE254	Arr. Kortrijk	0	10	0	0	0	0	0	0	0	0	0	0	0		0	0	0	0	0	0	0	0	0	0	0	0		0	100	100	100		0	0	0	0
BE	BE25	BE255	Arr. Oostende	0	10	0	0	0	0	0	0	0	0	0	0	0		0	0	0	0	0	0	0	0	0	0	0	0		0	100	100	100		0	0	0	0
BE	BE25	BE256	Arr. Roeselare	0	10	0	0	0	100	0	100	0	100	0	0	0		0	0	0	0	0	0	0	0	0	0	0	0		0	100	100	100		0	0	0	0
BE	BE25	BE257	Arr. Tielt	0	10	0	0	0	0	0	0	0	0	0	0	0		0	0	0	0	0	0	0	0	0	0	0	0		0	100	100	100		0	0	0	0
BE	BE25	BE258	Arr. Veurne	0	10	0	0	0	0	0	0	0	0	0	0	0		0	0	0	0	0	0	0	0	0	0	0	0		0	100	100	100		0	0	0	0
BE	BE31	BE310	Arr. Nivelles	0	10	0	0	0	0	0	0	0	0	0	0	0		0	0	0	0	0	0	0	0	0	0	0	0		0	100	100	100		0	0	0	0
BE	BE32	BE321	Arr. Ath	0	10	0	0	0	0	0	0	0	0	0	0	0		0	0	0	0	0	0	0	0	0	0	0	0		0	100	100	100		0	0	0	0
BE	BE32	BE322	Arr. Charleroi	0	10	0	0	0	0	0	0	0	0	0	0	0		0	0	0	0	0	0	0	0	0	0	0	0		0	100	100	100		0	0	0	0
BE	BE32	BE323	Arr. Mons	0	10	0	0	0	0	0	0	0	0	0	0	0		0	0	0	0	0	0	0	0	0	0	0	0		0	100	100	100		0	0	0	0
BE	BE32	BE324	Arr. Mouscron	0	10	0	0	0	0	0	0	0	0	0	0	0		0	0	0	0	0	0	0	0	0	0	0	0		0	100	100	100		0	0	0	0
BE	BE32	BE325	Arr. Soignies	0	10	0	0	0	0	0	0	0	0	0	0	0		0	0	0	0	0	0	0	0	0	0	0	0		0	100	100	100		0	0	0	0
BE	BE32	BE326	Arr. Thuin	0	10	0	0	0	0	0	0	0	0	0	0	0		0	0	0	0	0	0	0	0	0	0	0	0		0	100	100	100		0	0	0	0
BE	BE32	BE327	Arr. Tournai	0	10	0	0	0	0	0	0	0	0	0	0	0		0	0	0	0	0	0	0	0	0	0	0	0		0	100	100	100		0	0	0	0
BE	BE33	BE331	Arr. Huy	0	10	0	0	0	100	0	100	0	100	0	0	0		0	0	0	0	0	0	0	0	0	0	0	0		0	100	100	100		0	0	0	0
BE	BE33	BE332	Arr. Liege	0	10	0	0	0	100	0	100	0	100	0	0	0		0	0	0	0	0	0	0	0	0	0	0	0		0	100	100	100		0	0	0	0
BE	BE33	BE334	Arr. Waremme	0	10	0	0	0	27.6596	0	27.6596	0	0	0	0	0		0	0	0	0	0	0	0	0	0	0	0	0		0	100	100	100		0	0	0	0
BE	BE33	BE335	Arr. Verviers - Communes francophones	0	10	0	0	0	0	0	0	0	0	0	0	0		0	0	0	0	0	0	0	0	0	0	0	0		0	100	100	100		0	0	0	0
BE	BE33	BE336	Bezirk Verviers - Deutschsprachige Gemeinschaft	0	10	0	0	0	0	0	0	0	0	0	0	0		0	0	0	0	0	0	0	0	0	0	0	0		0	100	100	100		0	0	0	0
BE	BE34	BE341	Arr. Arlon	0	10	0	0	0	0	0	0	0	0	0	0	0		0	0	0	0	0	0	0	0	0	0	0	0		0	100	100	100		0	0	0	0
BE	BE34	BE342	Arr. Bastogne	0	10	0	0	0	0	0	0	0	0	0	0	0		0	0	0	0	0	0	0	0	0	0	0	0		0	100	100	100		0	0	0	0
BE	BE34	BE343	Arr. Marche-en-Famenne	0	10	0	0	0	0	0	0	0	0	0	0	0		0	0	0	0	0	0	0	0	0	0	0	0		0	100	100	100		0	0	0	0
BE	BE34	BE344	Arr. Neufchateau	0	10	0	0	0	0	0	0	0	0	0	0	0		0	0	0	0	0	0	0	0	0	0	0	0		0	100	100	100		0	0	0	0
BE	BE34	BE345	Arr. Virton	0	10	0	0	0	0	0	0	0	0	0	0	0		0	0	0	0	0	0	0	0	0	0	0	0		0	100	100	100		0	0	0	0
BE	BE35	BE351	Arr. Dinant	0	10	0	0	0	100	0	100	0	100	0	0	0		0	0	0	0	0	0	0	0	0	0	0	0		0	100	100	100		0	0	0	0
BE	BE35	BE352	Arr. Namur	0	10	0	0	0	100	0	100	0	100	0	0	0		0	0	0	0	0	0	0	0	0	0	0	0		0	100	100	100		0	0	0	0
BE	BE35	BE353	Arr. Philippeville	0	10	0	0	0	0	0	0	0	0	0	0	0		0	0	0	0	0	0	0	0	0	0	0	0		0	100	100	100		0	0	0	0
BG	BG31	BG311	Vidin	0	10	0	20.6897	20.6897	100	20.6897	100	20.6897	100	2.5	0	0		124.936	112.442	112.442	89.1781	0	0	0	109.631	86.9487	0	0	0		112.442	100	100	100		100	0	112.442	100
BG	BG31	BG312	Montana	0	10	0	20.6897	20.6897	100	20.6897	100	20.6897	100	2.5	0	0		69.8887	62.8999	62.8999	49.8861	0	0	0	61.3274	48.639	0	0	0		62.8999	100	100	100		100	0	62.8999	100
BG	BG31	BG313	Vratsa	0.598802	10	0	20.6897	20.6897	100	20.6897	100	20.6897	100	2.5	0	0		102.12	91.3576	91.3576	72.456	0	0	0	89.0736	70.6446	0	0	0		91.3576	100	100	100		100	0	91.3576	100
BG	BG31	BG314	Pleven	0	10	0	20.6897	20.6897	100	20.6897	100	20.6897	100	2.5	0	0		136.141	122.527	122.527	97.1763	0	0	0	119.463	94.7469	0	0	0		122.527	100	100	100		100	0	122.527	100
BG	BG31	BG315	Lovech	0	10	0	20.6897	20.6897	100	20.6897	100	20.6897	100	2.5	0	0		91.2341	82.1107	82.1107	65.1223	0	0	0	80.0579	63.4942	0	0	0		82.1107	100	100	100		100	0	82.1107	100
BG	BG32	BG321	Veliko Tarnovo	0	10	0	6.52174	6.52174	100	6.52174	100	6.52174	100	2.5	0	0		170.763	153.687	153.687	143.664	0	0	0	149.845	140.072	0	0	0		153.687	100	100	100		100	0	153.687	100
BG	BG32	BG322	Gabrovo	0	10	0	6.52174	6.52174	100	6.52174	100	6.52174	100	2.5	0	0		28.592	25.7328	25.7328	24.0545	0	0	0	25.0895	23.4532	0	0	0		25.7328	100	100	100		100	0	25.7328	100
BG	BG32	BG323	Ruse	0	10	0	6.52174	6.52174	99.5409	6.52174	100	6.52174	100	2.5	0	0		737.378	663.64	663.64	620.359	2.8483	0	0	647.049	604.85	2.77709	0	0		663.64	99.5409	100	100	BioE_COM-S	99.5409	2.8483	660.792	99.5708
BG	BG32	BG324	Razgrad	0	10	0	6.52174	6.52174	95.4128	6.52174	100	6.52174	100	2.5	0	0		141.577	127.419	127.419	119.109	5.46371	0	0	124.233	116.131	5.32712	0	0		127.419	95.4128	100	100	BioE_COM-S	95.4128	5.46371	121.955	95.712
BG	BG32	BG325	Silistra	0	10	0	6.52174	6.52174	92.9976	6.52174	100	6.52174	100	2.5	0	0		540.038	486.034	486.034	454.336	31.8143	0	0	473.883	442.978	31.0189	0	0		486.034	92.9976	100	100	BioE_COM-S	92.9976	31.8143	454.22	93.4543
BG	BG33	BG331	Varna	0	10	0	5.58659	5.58659	100	5.58659	100	5.58659	100	2.5	0	0		192.963	173.667	173.667	163.965	0	0	0	169.325	159.865	0	0	0		173.667	100	100	100		100	0	173.667	100
BG	BG33	BG332	Dobrich	0	10	0	5.58659	5.58659	100	5.58659	100	5.58659	100	2.5	0	0		233.131	209.818	209.818	198.096	0	0	0	204.572	193.144	0	0	0		209.818	100	100	100		100	0	209.818	100
BG	BG33	BG333	Shumen	0	10	0	5.58659	5.58659	99.9347	5.58659	100	5.58659	100	2.5	0	0		800.878	720.79	720.79	680.522	0.444205	0	0	702.77	663.509	0.4331	0	0		720.79	99.9347	100	100	BioE_COM-S	99.9347	0.444205	720.346	99.9384
BG	BG33	BG334	Targovishte	0	10	0	5.58659	5.58659	100	5.58659	100	5.58659	100	2.5	0	0		261.156	235.04	235.04	221.909	0	0	0	229.164	216.362	0	0	0		235.04	100	100	100		100	0	235.04	100
BG	BG34	BG341	Burgas	0	10	0	6.08696	6.08696	63.8734	6.08696	94.8993	6.08696	99.5014	2.5	0	0		706.986	636.287	636.287	597.557	215.877	30.4794	2.97919	620.38	582.618	210.48	29.7174	2.90471		636.287	63.8734	94.8993	99.5014	BioE_COM-S	63.8734	215.877	420.411	66.0724
BG	BG34	BG342	Sliven	0.906344	10	0	6.08696	6.08696	85.6711	6.08696	100	6.08696	100	2.5	0	0		514.059	458.46	458.46	430.554	61.6935	0	0	446.999	419.79	60.1512	0	0		458.46	85.6711	100	100	BioE_COM-S	85.6711	61.6935	396.767	86.5433
BG	BG34	BG343	Yambol	0	10	0	6.08696	6.08696	99.8726	6.08696	100	6.08696	100	2.5	0	0		264.135	237.722	237.722	223.252	0.284397	0	0	231.779	217.671	0.277287	0	0		237.722	99.8726	100	100	BioE_COM-S	99.8726	0.284397	237.438	99.8804
BG	BG34	BG344	Stara Zagora	0	10	0	6.08696	6.08696	72.4572	6.08696	100	6.08696	100	2.5	0	0		1428.6	1285.74	1285.74	1207.48	332.573	0	0	1253.6	1177.29	324.258	0	0		1285.74	72.4572	100	100	BioE_COM-S	72.4572	332.573	953.167	74.1338
BG	BG41	BG411	Sofia (stolitsa)	0	10	0	28.5714	28.5714	100	28.5714	100	28.5714	100	2.5	0	0		8.72262	7.85036	7.85036	5.6074	0	0	0	7.6541	5.46721	0	0	0		7.85036	100	100	100		100	0	7.85036	100
BG	BG41	BG412	Sofia	0	10	0	28.5714	28.5714	100	28.5714	100	28.5714	100	2.5	0	0		40.7271	36.6544	36.6544	26.1817	0	0	0	35.7381	25.5272	0	0	0		36.6544	100	100	100		100	0	36.6544	100
BG	BG41	BG413	Blagoevgrad	0.301594	10	0	28.5714	28.5714	86.9022	28.5714	100	28.5714	100	2.5	0	0		26.6514	23.9139	23.9139	17.0813	2.23728	0	0	23.316	16.6543	2.18135	0	0		23.9139	86.9022	100	100	BioE_COM-S	86.9022	2.23728	21.6766	90.6444
BG	BG41	BG414	Pernik	0	10	0	28.5714	28.5714	100	28.5714	100	28.5714	100	2.5	0	0		23.6763	21.3086	21.3086	15.2205	0	0	0	20.7759	14.8399	0	0	0		21.3086	100	100	100		100	0	21.3086	100
BG	BG41	BG415	Kyustendil	0	10	0	28.5714	28.5714	58.0904	28.5714	100	28.5714	100	2.5	0	0		23.8979	21.5081	21.5081	15.3629	6.43855	0	0	20.9704	14.9789	6.27758	0	0		21.5081	58.0904	100	100	BioE_COM-S	58.0904	6.43855	15.0696	70.0646
BG	BG42	BG421	Plovdiv	0.281081	10	0	12.5	12.5	60.4324	12.5	80.2378	12.5	100	2.5	0	0		655.336	588.144	588.144	514.626	203.625	101.701	0	573.441	501.761	198.534	99.1588	0		588.144	60.4324	80.2378	100	BioE_COM-S	60.4324	203.625	384.519	65.3784
BG	BG42	BG422	Haskovo	0	10	0	12.5	12.5	94.1903	12.5	100	12.5	100	2.5	0	0		493.464	444.117	444.117	388.603	22.5766	0	0	433.014	378.887	22.0122	0	0		444.117	94.1903	100	100	BioE_COM-S	94.1903	22.5766	421.541	94.9165
BG	BG42	BG423	Pazardzhik	0	10	0	12.5	12.5	50	12.5	94.2083	12.5	100	2.5	0	0		169.315	152.384	152.384	133.336	66.6679	7.72237	0	148.574	130.002	65.0012	7.52931	0		152.384	50	94.2083	100	BioE_COM-S	50	66.6679	85.7159	56.25
BG	BG42	BG424	Smolyan	0	10	0	12.5	12.5	0	12.5	0	12.5	0	2.5	0	0		5.40998	4.86898	4.86898	4.26036	4.26036	4.26036	4.26036	4.74726	4.15385	4.15385	4.15385	4.15385		4.86898	0	0	0	BioE_COM-S & BioE_COM-M & BioE_COM-L	0	4.26036	0.608623	12.5
BG	BG42	BG425	Kardzhali	0	10	0	12.5	12.5	100	12.5	100	12.5	100	2.5	0	0		36.9224	33.2302	33.2302	29.0764	0	0	0	32.3994	28.3495	0	0	0		33.2302	100	100	100		100	0	33.2302	100
CY	CY00	CY000	Kypros	0.827433	10	0	46.9741	46.9741	35.4841	46.9741	64.7864	46.9741	57.3156	20	0	0		2978.18	2658.19	2658.19	1409.53	909.37	496.346	601.649	2126.55	1127.62	727.496	397.077	481.319		2658.19	35.4841	64.7864	57.3156	BioE_COM-S	35.4841	909.37	1748.82	65.7899
CZ	CZ01	CZ010	Hlavni mesto Praha	0	10	0	0	0	100	0	100	0	100	0	0	0		0	0	0	0	0	0	0	0	0	0	0	0		0	100	100	100		0	0	0	0
CZ	CZ02	CZ020	Stredocesky kraj	0	10	0	0	0	71.5206	0	100	0	100	0	0	0		0	0	0	0	0	0	0	0	0	0	0	0		0	100	100	100		0	0	0	0
CZ	CZ03	CZ031	Jihocesky kraj	0	10	0	0	0	20.6587	0	100	0	100	0	0	0		0	0	0	0	0	0	0	0	0	0	0	0		0	100	100	100		0	0	0	0
CZ	CZ03	CZ032	Plzensky kraj	0	10	0	0	0	100	0	100	0	100	0	0	0		0	0	0	0	0	0	0	0	0	0	0	0		0	100	100	100		0	0	0	0
CZ	CZ04	CZ041	Karlovarsky kraj	0	10	0	0	0	100	0	100	0	100	0	0	0		0	0	0	0	0	0	0	0	0	0	0	0		0	100	100	100		0	0	0	0
CZ	CZ04	CZ042	Ustecky kraj	0	10	0	0	0	100	0	100	0	100	0	0	0		0	0	0	0	0	0	0	0	0	0	0	0		0	100	100	100		0	0	0	0
CZ	CZ05	CZ051	Liberecky kraj	0	10	0	0	0	100	0	100	0	100	0	0	0		0	0	0	0	0	0	0	0	0	0	0	0		0	100	100	100		0	0	0	0
CZ	CZ05	CZ052	Kralovehradecky kraj	0	10	0	0	0	44.6886	0	100	0	100	0	0	0		0	0	0	0	0	0	0	0	0	0	0	0		0	100	100	100		0	0	0	0
CZ	CZ05	CZ053	Pardubicky kraj	0	10	0	0	0	100	0	100	0	100	0	0	0		0	0	0	0	0	0	0	0	0	0	0	0		0	100	100	100		0	0	0	0
CZ	CZ06	CZ063	Kraj Vysocina	0	10	0	0	0	0	0	0	0	0	0	0	0		0	0	0	0	0	0	0	0	0	0	0	0		0	100	100	100		0	0	0	0
CZ	CZ06	CZ064	Jihomoravsky kraj	0	10	0	0	0	92.2699	0	100	0	100	0	0	0		0	0	0	0	0	0	0	0	0	0	0	0		0	100	100	100		0	0	0	0
CZ	CZ07	CZ071	Olomoucky kraj	0	10	0	0	0	100	0	100	0	100	0	0	0		0	0	0	0	0	0	0	0	0	0	0	0		0	100	100	100		0	0	0	0
CZ	CZ07	CZ072	Zlinsky kraj	0	10	0	0	0	100	0	100	0	100	0	0	0		0	0	0	0	0	0	0	0	0	0	0	0		0	100	100	100		0	0	0	0
CZ	CZ08	CZ080	Moravskoslezsky kraj	0	10	0	0	0	100	0	100	0	100	0	0	0		0	0	0	0	0	0	0	0	0	0	0	0		0	100	100	100		0	0	0	0
DE	DE11	DE111	Stuttgart, Stadtkreis	0	10	0	7.14286	7.14286	62.4161	7.14286	100	7.14286	100	0.25	0	0		0	0	0	0	0	0	0	0	0	0	0	0		0	62.4161	100	100		0	0	0	0
DE	DE11	DE112	Boblingen	0	10	0	7.14286	7.14286	98.4055	7.14286	100	7.14286	100	0.25	0	0		0	0	0	0	0	0	0	0	0	0	0	0		0	98.4055	100	100		0	0	0	0
DE	DE11	DE113	Esslingen	0	10	0	7.14286	7.14286	83.5766	7.14286	100	7.14286	100	0.25	0	0		0	0	0	0	0	0	0	0	0	0	0	0		0	83.5766	100	100		0	0	0	0
DE	DE11	DE114	Goppingen	0	10	0	7.14286	7.14286	100	7.14286	100	7.14286	100	0.25	0	0		0	0	0	0	0	0	0	0	0	0	0	0		0	100	100	100		0	0	0	0
DE	DE11	DE115	Ludwigsburg	0	10	0	7.14286	7.14286	81.5504	7.14286	100	7.14286	100	0.25	0	0		0	0	0	0	0	0	0	0	0	0	0	0		0	81.5504	100	100		0	0	0	0
DE	DE11	DE116	Rems-Murr-Kreis	0	10	0	7.14286	7.14286	71.0305	7.14286	100	7.14286	100	0.25	0	0		0	0	0	0	0	0	0	0	0	0	0	0		0	71.0305	100	100		0	0	0	0
DE	DE11	DE117	Heilbronn, Stadtkreis	0	10	0	7.14286	7.14286	0	7.14286	100	7.14286	100	0.25	0	0		0	0	0	0	0	0	0	0	0	0	0	0		0	0	100	100		0	0	0	0
DE	DE11	DE118	Heilbronn, Landkreis	0	10	0	7.14286	7.14286	29.5483	7.14286	100	7.14286	100	0.25	0	0		0	0	0	0	0	0	0	0	0	0	0	0		0	29.5483	100	100		0	0	0	0
DE	DE11	DE119	Hohenlohekreis	0	10	0	7.14286	7.14286	100	7.14286	100	7.14286	100	0.25	0	0		0	0	0	0	0	0	0	0	0	0	0	0		0	100	100	100		0	0	0	0
DE	DE11	DE11A	Schwabisch Hall	0	10	0	7.14286	7.14286	100	7.14286	100	7.14286	100	0.25	0	0		0	0	0	0	0	0	0	0	0	0	0	0		0	100	100	100		0	0	0	0
DE	DE11	DE11B	Main-Tauber-Kreis	0	10	0	7.14286	7.14286	100	7.14286	100	7.14286	100	0.25	0	0		0	0	0	0	0	0	0	0	0	0	0	0		0	100	100	100		0	0	0	0
DE	DE11	DE11C	Heidenheim	0	10	0	7.14286	7.14286	0	7.14286	0	7.14286	0	0.25	0	0		0	0	0	0	0	0	0	0	0	0	0	0		0	0	0	0		0	0	0	0
DE	DE11	DE11D	Ostalbkreis	0	10	0	7.14286	7.14286	100	7.14286	100	7.14286	100	0.25	0	0		0	0	0	0	0	0	0	0	0	0	0	0		0	100	100	100		0	0	0	0
DE	DE12	DE121	Baden-Baden, Stadtkreis	0	10	0	7.14	7.14	56.7901	7.14	100	7.14	97.5309	0.25	0	0		0	0	0	0	0	0	0	0	0	0	0	0		0	56.7901	100	97.5309		0	0	0	0
DE	DE12	DE122	Karlsruhe, Stadtkreis	0	10	0	7.14	7.14	100	7.14	100	7.14	100	0.25	0	0		0	0	0	0	0	0	0	0	0	0	0	0		0	100	100	100		0	0	0	0
DE	DE12	DE123	Karlsruhe, Landkreis	0	10	0	7.14	7.14	100	7.14	100	7.14	100	0.25	0	0		0	0	0	0	0	0	0	0	0	0	0	0		0	100	100	100		0	0	0	0
DE	DE12	DE124	Rastatt	0	10	0	7.14	7.14	82.1154	7.14	92.9808	7.14	79.6154	0.25	0	0		0	0	0	0	0	0	0	0	0	0	0	0		0	82.1154	92.9808	79.6154		0	0	0	0
DE	DE12	DE125	Heidelberg, Stadtkreis	0	10	0	7.14	7.14	100	7.14	100	7.14	100	0.25	0	0		0	0	0	0	0	0	0	0	0	0	0	0		0	100	100	100		0	0	0	0
DE	DE12	DE126	Mannheim, Stadtkreis	0	10	0	7.14	7.14	0	7.14	0	7.14	0	0.25	0	0		0	0	0	0	0	0	0	0	0	0	0	0		0	0	0	0		0	0	0	0
DE	DE12	DE127	Neckar-Odenwald-Kreis	0	10	0	7.14	7.14	100	7.14	100	7.14	100	0.25	0	0		0	0	0	0	0	0	0	0	0	0	0	0		0	100	100	100		0	0	0	0
DE	DE12	DE128	Rhein-Neckar-Kreis	0	10	0	7.14	7.14	100	7.14	100	7.14	100	0.25	0	0		0	0	0	0	0	0	0	0	0	0	0	0		0	100	100	100		0	0	0	0
DE	DE12	DE129	Pforzheim, Stadtkreis	0	10	0	7.14	7.14	100	7.14	100	7.14	100	0.25	0	0		0	0	0	0	0	0	0	0	0	0	0	0		0	100	100	100		0	0	0	0
DE	DE12	DE12A	Calw	0	10	0	7.14	7.14	100	7.14	100	7.14	100	0.25	0	0		0	0	0	0	0	0	0	0	0	0	0	0		0	100	100	100		0	0	0	0
DE	DE12	DE12B	Enzkreis	0	10	0	7.14	7.14	100	7.14	100	7.14	100	0.25	0	0		0	0	0	0	0	0	0	0	0	0	0	0		0	100	100	100		0	0	0	0
DE	DE12	DE12C	Freudenstadt	0	10	0	7.14	7.14	100	7.14	100	7.14	100	0.25	0	0		0	0	0	0	0	0	0	0	0	0	0	0		0	100	100	100		0	0	0	0
DE	DE13	DE131	Freiburg im Breisgau, Stadtkreis	0	10	0	7.14	7.14	16.2791	7.14	70.6977	7.14	16.2791	0.25	0	0		0	0	0	0	0	0	0	0	0	0	0	0		0	16.2791	70.6977	16.2791		0	0	0	0
DE	DE13	DE132	Breisgau-Hochschwarzwald	0	10	0	7.14	7.14	7.55581	7.14	43.3314	7.14	59.1872	0.25	0	0		0	0	0	0	0	0	0	0	0	0	0	0		0	7.55581	43.3314	59.1872		0	0	0	0
DE	DE13	DE133	Emmendingen	0	10	0	7.14	7.14	7.69231	7.14	41.5174	7.14	54.8999	0.25	0	0		0	0	0	0	0	0	0	0	0	0	0	0		0	7.69231	41.5174	54.8999		0	0	0	0
DE	DE13	DE134	Ortenaukreis	0	10	0	7.14	7.14	18.5027	7.14	24.224	7.14	17.1029	0.25	0	0		0	0	0	0	0	0	0	0	0	0	0	0		0	18.5027	24.224	17.1029		0	0	0	0
DE	DE13	DE135	Rottweil	0	10	0	7.14	7.14	0	7.14	0	7.14	0	0.25	0	0		0	0	0	0	0	0	0	0	0	0	0	0		0	0	0	0		0	0	0	0
DE	DE13	DE136	Schwarzwald-Baar-Kreis	0	10	0	7.14	7.14	0	7.14	0	7.14	0	0.25	0	0		0	0	0	0	0	0	0	0	0	0	0	0		0	0	0	0		0	0	0	0
DE	DE13	DE137	Tuttlingen	0	10	0	7.14	7.14	0	7.14	0	7.14	0	0.25	0	0		0	0	0	0	0	0	0	0	0	0	0	0		0	0	0	0		0	0	0	0
DE	DE13	DE138	Konstanz	0	10	0	7.14	7.14	22.695	7.14	100	7.14	100	0.25	0	0		0	0	0	0	0	0	0	0	0	0	0	0		0	22.695	100	100		0	0	0	0
DE	DE13	DE139	Lorrach	0	10	0	7.14	7.14	35.2564	7.14	100	7.14	100	0.25	0	0		0	0	0	0	0	0	0	0	0	0	0	0		0	35.2564	100	100		0	0	0	0
DE	DE13	DE13A	Waldshut	0	10	0	7.14	7.14	100	7.14	100	7.14	100	0.25	0	0		0	0	0	0	0	0	0	0	0	0	0	0		0	100	100	100		0	0	0	0
DE	DE14	DE141	Reutlingen	0	10	0	7.14	7.14	23.8176	7.14	100	7.14	100	0.25	0	0		0	0	0	0	0	0	0	0	0	0	0	0		0	23.8176	100	100		0	0	0	0
DE	DE14	DE142	Tubingen, Landkreis	0	10	0	7.14	7.14	39.6846	7.14	100	7.14	100	0.25	0	0		0	0	0	0	0	0	0	0	0	0	0	0		0	39.6846	100	100		0	0	0	0
DE	DE14	DE143	Zollernalbkreis	0	10	0	7.14	7.14	100	7.14	100	7.14	100	0.25	0	0		0	0	0	0	0	0	0	0	0	0	0	0		0	100	100	100		0	0	0	0
DE	DE14	DE144	Ulm, Stadtkreis	0	10	0	7.14	7.14	0	7.14	0	7.14	0	0.25	0	0		0	0	0	0	0	0	0	0	0	0	0	0		0	0	0	0		0	0	0	0
DE	DE14	DE145	Alb-Donau-Kreis	0	10	0	7.14	7.14	0	7.14	0	7.14	0	0.25	0	0		0	0	0	0	0	0	0	0	0	0	0	0		0	0	0	0		0	0	0	0
DE	DE14	DE146	Biberach	0	10	0	7.14	7.14	100	7.14	100	7.14	100	0.25	0	0		0	0	0	0	0	0	0	0	0	0	0	0		0	100	100	100		0	0	0	0
DE	DE14	DE147	Bodenseekreis	0	10	0	7.14	7.14	12.3631	7.14	61.5023	7.14	89.7496	0.25	0	0		0	0	0	0	0	0	0	0	0	0	0	0		0	12.3631	61.5023	89.7496		0	0	0	0
DE	DE14	DE148	Ravensburg	0	10	0	7.14	7.14	94.6667	7.14	100	7.14	100	0.25	0	0		0	0	0	0	0	0	0	0	0	0	0	0		0	94.6667	100	100		0	0	0	0
DE	DE14	DE149	Sigmaringen	0	10	0	7.14	7.14	100	7.14	100	7.14	100	0.25	0	0		0	0	0	0	0	0	0	0	0	0	0	0		0	100	100	100		0	0	0	0
DE	DE21	DE211	Ingolstadt, Kreisfreie Stadt	0	10	0	0	0	0	0	0	0	0	0.25	0	0		0	0	0	0	0	0	0	0	0	0	0	0		0	100	100	100		0	0	0	0
DE	DE21	DE212	Munchen, Kreisfreie Stadt	0	10	0	0	0	0	0	0	0	0	0.25	0	0		0	0	0	0	0	0	0	0	0	0	0	0		0	100	100	100		0	0	0	0
DE	DE21	DE213	Rosenheim, Kreisfreie Stadt	0	10	0	0	0	0	0	0	0	0	0.25	0	0		0	0	0	0	0	0	0	0	0	0	0	0		0	100	100	100		0	0	0	0
DE	DE21	DE214	Altotting	0	10	0	0	0	0	0	0	0	0	0.25	0	0		0	0	0	0	0	0	0	0	0	0	0	0		0	100	100	100		0	0	0	0
DE	DE21	DE215	Berchtesgadener Land	0	10	0	0	0	100	0	100	0	100	0.25	0	0		0	0	0	0	0	0	0	0	0	0	0	0		0	100	100	100		0	0	0	0
DE	DE21	DE216	Bad Tolz-Wolfratshausen	0	10	0	0	0	0	0	0	0	0	0.25	0	0		0	0	0	0	0	0	0	0	0	0	0	0		0	100	100	100		0	0	0	0
DE	DE21	DE217	Dachau	0	10	0	0	0	0	0	0	0	0	0.25	0	0		0	0	0	0	0	0	0	0	0	0	0	0		0	100	100	100		0	0	0	0
DE	DE21	DE218	Ebersberg	0	10	0	0	0	0	0	0	0	0	0.25	0	0		0	0	0	0	0	0	0	0	0	0	0	0		0	100	100	100		0	0	0	0
DE	DE21	DE219	Eichstatt	0	10	0	0	0	100	0	100	0	100	0.25	0	0		0	0	0	0	0	0	0	0	0	0	0	0		0	100	100	100		0	0	0	0
DE	DE21	DE21A	Erding	0	10	0	0	0	0	0	0	0	0	0.25	0	0		0	0	0	0	0	0	0	0	0	0	0	0		0	100	100	100		0	0	0	0
DE	DE21	DE21B	Freising	0	10	0	0	0	100	0	100	0	100	0.25	0	0		0	0	0	0	0	0	0	0	0	0	0	0		0	100	100	100		0	0	0	0
DE	DE21	DE21C	Furstenfeldbruck	0	10	0	0	0	0	0	0	0	0	0.25	0	0		0	0	0	0	0	0	0	0	0	0	0	0		0	100	100	100		0	0	0	0
DE	DE21	DE21D	Garmisch-Partenkirchen	0	10	0	0	0	0	0	0	0	0	0.25	0	0		0	0	0	0	0	0	0	0	0	0	0	0		0	100	100	100		0	0	0	0
DE	DE21	DE21E	Landsberg am Lech	0	10	0	0	0	0	0	0	0	0	0.25	0	0		0	0	0	0	0	0	0	0	0	0	0	0		0	100	100	100		0	0	0	0
DE	DE21	DE21F	Miesbach	0	10	0	0	0	0	0	0	0	0	0.25	0	0		0	0	0	0	0	0	0	0	0	0	0	0		0	100	100	100		0	0	0	0
DE	DE21	DE21G	Muhldorf a. Inn	0	10	0	0	0	0	0	0	0	0	0.25	0	0		0	0	0	0	0	0	0	0	0	0	0	0		0	100	100	100		0	0	0	0
DE	DE21	DE21H	Munchen, Landkreis	0	10	0	0	0	0	0	0	0	0	0.25	0	0		0	0	0	0	0	0	0	0	0	0	0	0		0	100	100	100		0	0	0	0
DE	DE21	DE21I	Neuburg-Schrobenhausen	0	10	0	0	0	0	0	0	0	0	0.25	0	0		0	0	0	0	0	0	0	0	0	0	0	0		0	100	100	100		0	0	0	0
DE	DE21	DE21J	Pfaffenhofen a. d. Ilm	0	10	0	0	0	100	0	100	0	100	0.25	0	0		0	0	0	0	0	0	0	0	0	0	0	0		0	100	100	100		0	0	0	0
DE	DE21	DE21K	Rosenheim, Landkreis	0	10	0	0	0	0	0	0	0	0	0.25	0	0		0	0	0	0	0	0	0	0	0	0	0	0		0	100	100	100		0	0	0	0
DE	DE21	DE21L	Starnberg	0	10	0	0	0	0	0	0	0	0	0.25	0	0		0	0	0	0	0	0	0	0	0	0	0	0		0	100	100	100		0	0	0	0
DE	DE21	DE21M	Traunstein	0	10	0	0	0	0	0	0	0	0	0.25	0	0		0	0	0	0	0	0	0	0	0	0	0	0		0	100	100	100		0	0	0	0
DE	DE21	DE21N	Weilheim-Schongau	0	10	0	0	0	0	0	0	0	0	0.25	0	0		0	0	0	0	0	0	0	0	0	0	0	0		0	100	100	100		0	0	0	0
DE	DE22	DE221	Landshut, Kreisfreie Stadt	0	10	0	0	0	0	0	0	0	0	0.25	0	0		0	0	0	0	0	0	0	0	0	0	0	0		0	100	100	100		0	0	0	0
DE	DE22	DE222	Passau, Kreisfreie Stadt	0	10	0	0	0	0	0	0	0	0	0.25	0	0		0	0	0	0	0	0	0	0	0	0	0	0		0	100	100	100		0	0	0	0
DE	DE22	DE223	Straubing, Kreisfreie Stadt	0	10	0	0	0	0	0	0	0	0	0.25	0	0		0	0	0	0	0	0	0	0	0	0	0	0		0	100	100	100		0	0	0	0
DE	DE22	DE224	Deggendorf	0	10	0	0	0	0	0	0	0	0	0.25	0	0		0	0	0	0	0	0	0	0	0	0	0	0		0	100	100	100		0	0	0	0
DE	DE22	DE225	Freyung-Grafenau	0	10	0	0	0	0	0	0	0	0	0.25	0	0		0	0	0	0	0	0	0	0	0	0	0	0		0	100	100	100		0	0	0	0
DE	DE22	DE226	Kelheim	0	10	0	0	0	100	0	100	0	100	0.25	0	0		0	0	0	0	0	0	0	0	0	0	0	0		0	100	100	100		0	0	0	0
DE	DE22	DE227	Landshut, Landkreis	0	10	0	0	0	100	0	100	0	100	0.25	0	0		0	0	0	0	0	0	0	0	0	0	0	0		0	100	100	100		0	0	0	0
DE	DE22	DE228	Passau, Landkreis	0	10	0	0	0	0	0	0	0	0	0.25	0	0		0	0	0	0	0	0	0	0	0	0	0	0		0	100	100	100		0	0	0	0
DE	DE22	DE229	Regen	0	10	0	0	0	0	0	0	0	0	0.25	0	0		0	0	0	0	0	0	0	0	0	0	0	0		0	100	100	100		0	0	0	0
DE	DE22	DE22A	Rottal-Inn	0	10	0	0	0	0	0	0	0	0	0.25	0	0		0	0	0	0	0	0	0	0	0	0	0	0		0	100	100	100		0	0	0	0
DE	DE22	DE22B	Straubing-Bogen	0	10	0	0	0	0	0	0	0	0	0.25	0	0		0	0	0	0	0	0	0	0	0	0	0	0		0	100	100	100		0	0	0	0
DE	DE22	DE22C	Dingolfing-Landau	0	10	0	0	0	0	0	0	0	0	0.25	0	0		0	0	0	0	0	0	0	0	0	0	0	0		0	100	100	100		0	0	0	0
DE	DE23	DE231	Amberg, Kreisfreie Stadt	0	10	0	0	0	0	0	0	0	0	0.25	0	0		0	0	0	0	0	0	0	0	0	0	0	0		0	100	100	100		0	0	0	0
DE	DE23	DE232	Regensburg, Kreisfreie Stadt	0	10	0	0	0	0	0	0	0	0	0.25	0	0		0	0	0	0	0	0	0	0	0	0	0	0		0	100	100	100		0	0	0	0
DE	DE23	DE233	Weiden i. d. Opf, Kreisfreie Stadt	0	10	0	0	0	0	0	0	0	0	0.25	0	0		0	0	0	0	0	0	0	0	0	0	0	0		0	100	100	100		0	0	0	0
DE	DE23	DE234	Amberg-Sulzbach	0	10	0	0	0	0	0	0	0	0	0.25	0	0		0	0	0	0	0	0	0	0	0	0	0	0		0	100	100	100		0	0	0	0
DE	DE23	DE235	Cham	0	10	0	0	0	0	0	0	0	0	0.25	0	0		0	0	0	0	0	0	0	0	0	0	0	0		0	100	100	100		0	0	0	0
DE	DE23	DE236	Neumarkt i. d. Opf.	0	10	0	0	0	100	0	100	0	100	0.25	0	0		0	0	0	0	0	0	0	0	0	0	0	0		0	100	100	100		0	0	0	0
DE	DE23	DE237	Neustadt a. d. Waldnaab	0	10	0	0	0	0	0	0	0	0	0.25	0	0		0	0	0	0	0	0	0	0	0	0	0	0		0	100	100	100		0	0	0	0
DE	DE23	DE238	Regensburg, Landkreis	0	10	0	0	0	0	0	0	0	0	0.25	0	0		0	0	0	0	0	0	0	0	0	0	0	0		0	100	100	100		0	0	0	0
DE	DE23	DE239	Schwandorf	0	10	0	0	0	0	0	0	0	0	0.25	0	0		0	0	0	0	0	0	0	0	0	0	0	0		0	100	100	100		0	0	0	0
DE	DE23	DE23A	Tirschenreuth	0	10	0	0	0	0	0	0	0	0	0.25	0	0		0	0	0	0	0	0	0	0	0	0	0	0		0	100	100	100		0	0	0	0
DE	DE24	DE241	Bamberg, Kreisfreie Stadt	0	10	0	0	0	0	0	0	0	0	0.25	0	0		0	0	0	0	0	0	0	0	0	0	0	0		0	100	100	100		0	0	0	0
DE	DE24	DE242	Bayreuth, Kreisfreie Stadt	0	10	0	0	0	0	0	0	0	0	0.25	0	0		0	0	0	0	0	0	0	0	0	0	0	0		0	100	100	100		0	0	0	0
DE	DE24	DE243	Coburg, Kreisfreie Stadt	0	10	0	0	0	0	0	0	0	0	0.25	0	0		0	0	0	0	0	0	0	0	0	0	0	0		0	100	100	100		0	0	0	0
DE	DE24	DE244	Hof, Kreisfreie Stadt	0	10	0	0	0	0	0	0	0	0	0.25	0	0		0	0	0	0	0	0	0	0	0	0	0	0		0	100	100	100		0	0	0	0
DE	DE24	DE245	Bamberg, Landkreis	0	10	0	0	0	0	0	0	0	0	0.25	0	0		0	0	0	0	0	0	0	0	0	0	0	0		0	100	100	100		0	0	0	0
DE	DE24	DE246	Bayreuth, Landkreis	0	10	0	0	0	0	0	0	0	0	0.25	0	0		0	0	0	0	0	0	0	0	0	0	0	0		0	100	100	100		0	0	0	0
DE	DE24	DE247	Coburg, Landkreis	0	10	0	0	0	0	0	0	0	0	0.25	0	0		0	0	0	0	0	0	0	0	0	0	0	0		0	100	100	100		0	0	0	0
DE	DE24	DE248	Forchheim	0	10	0	0	0	14.876	0	100	0	100	0.25	0	0		0	0	0	0	0	0	0	0	0	0	0	0		0	100	100	100		0	0	0	0
DE	DE24	DE249	Hof, Landkreis	0	10	0	0	0	0	0	0	0	0	0.25	0	0		0	0	0	0	0	0	0	0	0	0	0	0		0	100	100	100		0	0	0	0
DE	DE24	DE24A	Kronach	0	10	0	0	0	0	0	0	0	0	0.25	0	0		0	0	0	0	0	0	0	0	0	0	0	0		0	100	100	100		0	0	0	0
DE	DE24	DE24B	Kulmbach	0	10	0	0	0	0	0	0	0	0	0.25	0	0		0	0	0	0	0	0	0	0	0	0	0	0		0	100	100	100		0	0	0	0
DE	DE24	DE24C	Lichtenfels	0	10	0	0	0	0	0	0	0	0	0.25	0	0		0	0	0	0	0	0	0	0	0	0	0	0		0	100	100	100		0	0	0	0
DE	DE24	DE24D	Wunsiedel i. Fichtelgebirge	0	10	0	0	0	0	0	0	0	0	0.25	0	0		0	0	0	0	0	0	0	0	0	0	0	0		0	100	100	100		0	0	0	0
DE	DE25	DE251	Ansbach, Kreisfreie Stadt	0	10	0	0	0	0	0	0	0	0	0.25	0	0		0	0	0	0	0	0	0	0	0	0	0	0		0	100	100	100		0	0	0	0
DE	DE25	DE252	Erlangen, Kreisfreie Stadt	0	10	0	0	0	0	0	0	0	0	0.25	0	0		0	0	0	0	0	0	0	0	0	0	0	0		0	100	100	100		0	0	0	0
DE	DE25	DE253	Furth, Kreisfreie Stadt	0	10	0	0	0	0	0	0	0	0	0.25	0	0		0	0	0	0	0	0	0	0	0	0	0	0		0	100	100	100		0	0	0	0
DE	DE25	DE254	Nurnberg, Kreisfreie Stadt	0	10	0	0	0	0	0	0	0	0	0.25	0	0		0	0	0	0	0	0	0	0	0	0	0	0		0	100	100	100		0	0	0	0
DE	DE25	DE255	Schwabach, Kreisfreie Stadt	0	10	0	0	0	0	0	0	0	0	0.25	0	0		0	0	0	0	0	0	0	0	0	0	0	0		0	100	100	100		0	0	0	0
DE	DE25	DE256	Ansbach, Landkreis	0	10	0	0	0	0	0	0	0	0	0.25	0	0		0	0	0	0	0	0	0	0	0	0	0	0		0	100	100	100		0	0	0	0
DE	DE25	DE257	Erlangen-Hochstadt	0	10	0	0	0	0	0	0	0	0	0.25	0	0		0	0	0	0	0	0	0	0	0	0	0	0		0	100	100	100		0	0	0	0
DE	DE25	DE258	Furth, Landkreis	0	10	0	0	0	0	0	0	0	0	0.25	0	0		0	0	0	0	0	0	0	0	0	0	0	0		0	100	100	100		0	0	0	0
DE	DE25	DE259	Nurnberger Land	0	10	0	0	0	0	0	0	0	0	0.25	0	0		0	0	0	0	0	0	0	0	0	0	0	0		0	100	100	100		0	0	0	0
DE	DE25	DE25A	Neustadt a. d. Aisch-Bad Windsheim	0	10	0	0	0	100	0	100	0	100	0.25	0	0		0	0	0	0	0	0	0	0	0	0	0	0		0	100	100	100		0	0	0	0
DE	DE25	DE25B	Roth	0	10	0	0	0	0	0	0	0	0	0.25	0	0		0	0	0	0	0	0	0	0	0	0	0	0		0	100	100	100		0	0	0	0
DE	DE25	DE25C	Weissenburg-Gunzenhausen	0	10	0	0	0	0	0	0	0	0	0.25	0	0		0	0	0	0	0	0	0	0	0	0	0	0		0	100	100	100		0	0	0	0
DE	DE26	DE261	Aschaffenburg, Kreisfreie Stadt	0	10	0	0	0	100	0	100	0	100	0.25	0	0		0	0	0	0	0	0	0	0	0	0	0	0		0	100	100	100		0	0	0	0
DE	DE26	DE262	Schweinfurt, Kreisfreie Stadt	0	10	0	0	0	0	0	0	0	0	0.25	0	0		0	0	0	0	0	0	0	0	0	0	0	0		0	100	100	100		0	0	0	0
DE	DE26	DE263	Wurzburg, Kreisfreie Stadt	0	10	0	0	0	91.5663	0	100	0	100	0.25	0	0		0	0	0	0	0	0	0	0	0	0	0	0		0	100	100	100		0	0	0	0
DE	DE26	DE264	Aschaffenburg, Landkreis	0	10	0	0	0	100	0	100	0	100	0.25	0	0		0	0	0	0	0	0	0	0	0	0	0	0		0	100	100	100		0	0	0	0
DE	DE26	DE265	Bad Kissingen	0	10	0	0	0	100	0	100	0	100	0.25	0	0		0	0	0	0	0	0	0	0	0	0	0	0		0	100	100	100		0	0	0	0
DE	DE26	DE266	Rhon-Grabfeld	0	10	0	0	0	0	0	0	0	0	0.25	0	0		0	0	0	0	0	0	0	0	0	0	0	0		0	100	100	100		0	0	0	0
DE	DE26	DE267	Hassberge	0	10	0	0	0	0	0	0	0	0	0.25	0	0		0	0	0	0	0	0	0	0	0	0	0	0		0	100	100	100		0	0	0	0
DE	DE26	DE268	Kitzingen	0	10	0	0	0	45.5064	0	100	0	100	0.25	0	0		0	0	0	0	0	0	0	0	0	0	0	0		0	100	100	100		0	0	0	0
DE	DE26	DE269	Miltenberg	0	10	0	0	0	100	0	100	0	100	0.25	0	0		0	0	0	0	0	0	0	0	0	0	0	0		0	100	100	100		0	0	0	0
DE	DE26	DE26A	Main-Spessart	0	10	0	0	0	83.9858	0	100	0	100	0.25	0	0		0	0	0	0	0	0	0	0	0	0	0	0		0	100	100	100		0	0	0	0
DE	DE26	DE26B	Schweinfurt, Landkreis	0	10	0	0	0	76.2712	0	100	0	100	0.25	0	0		0	0	0	0	0	0	0	0	0	0	0	0		0	100	100	100		0	0	0	0
DE	DE26	DE26C	Wurzburg, Landkreis	0	10	0	0	0	28.9557	0	100	0	100	0.25	0	0		0	0	0	0	0	0	0	0	0	0	0	0		0	100	100	100		0	0	0	0
DE	DE27	DE271	Augsburg, Kreisfreie Stadt	0	10	0	0	0	0	0	0	0	0	0.25	0	0		0	0	0	0	0	0	0	0	0	0	0	0		0	100	100	100		0	0	0	0
DE	DE27	DE272	Kaufbeuren, Kreisfreie Stadt	0	10	0	0	0	0	0	0	0	0	0.25	0	0		0	0	0	0	0	0	0	0	0	0	0	0		0	100	100	100		0	0	0	0
DE	DE27	DE273	Kempten (Allgau), Kreisfreie Stadt	0	10	0	0	0	0	0	0	0	0	0.25	0	0		0	0	0	0	0	0	0	0	0	0	0	0		0	100	100	100		0	0	0	0
DE	DE27	DE274	Memmingen, Kreisfreie Stadt	0	10	0	0	0	0	0	0	0	0	0.25	0	0		0	0	0	0	0	0	0	0	0	0	0	0		0	100	100	100		0	0	0	0
DE	DE27	DE275	Aichach-Friedberg	0	10	0	0	0	0	0	0	0	0	0.25	0	0		0	0	0	0	0	0	0	0	0	0	0	0		0	100	100	100		0	0	0	0
DE	DE27	DE276	Augsburg, Landkreis	0	10	0	0	0	0	0	0	0	0	0.25	0	0		0	0	0	0	0	0	0	0	0	0	0	0		0	100	100	100		0	0	0	0
DE	DE27	DE277	Dillingen a.d. Donau	0	10	0	0	0	0	0	0	0	0	0.25	0	0		0	0	0	0	0	0	0	0	0	0	0	0		0	100	100	100		0	0	0	0
DE	DE27	DE278	Gunzburg	0	10	0	0	0	0	0	0	0	0	0.25	0	0		0	0	0	0	0	0	0	0	0	0	0	0		0	100	100	100		0	0	0	0
DE	DE27	DE279	Neu-Ulm	0	10	0	0	0	0	0	0	0	0	0.25	0	0		0	0	0	0	0	0	0	0	0	0	0	0		0	100	100	100		0	0	0	0
DE	DE27	DE27A	Lindau (Bodensee)	0	10	0	0	0	0	0	36.5297	0	100	0.25	0	0		0	0	0	0	0	0	0	0	0	0	0	0		0	100	100	100		0	0	0	0
DE	DE27	DE27B	Ostallgau	0	10	0	0	0	0	0	0	0	0	0.25	0	0		0	0	0	0	0	0	0	0	0	0	0	0		0	100	100	100		0	0	0	0
DE	DE27	DE27C	Unterallgau	0	10	0	0	0	0	0	0	0	0	0.25	0	0		0	0	0	0	0	0	0	0	0	0	0	0		0	100	100	100		0	0	0	0
DE	DE27	DE27D	Donau-Ries	0	10	0	0	0	0	0	0	0	0	0.25	0	0		0	0	0	0	0	0	0	0	0	0	0	0		0	100	100	100		0	0	0	0
DE	DE27	DE27E	Oberallgau	0	10	0	0	0	0	0	0	0	0	0.25	0	0		0	0	0	0	0	0	0	0	0	0	0	0		0	100	100	100		0	0	0	0
DE	DE30	DE300	Berlin	0	10	0	0	0	0	0	0	0	0	0.25	0	0		0	0	0	0	0	0	0	0	0	0	0	0		0	100	100	100		0	0	0	0
DE	DE40	DE401	Brandenburg an der Havel, Kreisfreie Stadt	0	10	0	0	0	0	0	0	0	0	0.25	0	0		0	0	0	0	0	0	0	0	0	0	0	0		0	100	100	100		0	0	0	0
DE	DE40	DE402	Cottbus, Kreisfreie Stadt	0	10	0	0	0	0	0	0	0	0	0.25	0	0		0	0	0	0	0	0	0	0	0	0	0	0		0	100	100	100		0	0	0	0
DE	DE40	DE403	Frankfurt (Oder), Kreisfreie Stadt	0	10	0	0	0	0	0	100	0	100	0.25	0	0		0	0	0	0	0	0	0	0	0	0	0	0		0	100	100	100		0	0	0	0
DE	DE40	DE404	Potsdam, Kreisfreie Stadt	0	10	0	0	0	100	0	100	0	100	0.25	0	0		0	0	0	0	0	0	0	0	0	0	0	0		0	100	100	100		0	0	0	0
DE	DE40	DE405	Barnim	0	10	0	0	0	61.5385	0	100	0	100	0.25	0	0		0	0	0	0	0	0	0	0	0	0	0	0		0	100	100	100		0	0	0	0
DE	DE40	DE406	Dahme-Spreewald	0	10	0	0	0	0	0	0	0	0	0.25	0	0		0	0	0	0	0	0	0	0	0	0	0	0		0	100	100	100		0	0	0	0
DE	DE40	DE407	Elbe-Elster	0	10	0	0	0	100	0	100	0	100	0.25	0	0		0	0	0	0	0	0	0	0	0	0	0	0		0	100	100	100		0	0	0	0
DE	DE40	DE408	Havelland	0	10	0	0	0	100	0	100	0	100	0.25	0	0		0	0	0	0	0	0	0	0	0	0	0	0		0	100	100	100		0	0	0	0
DE	DE40	DE409	Markisch-Oderland	0	10	0	0	0	10.3896	0	100	0	100	0.25	0	0		0	0	0	0	0	0	0	0	0	0	0	0		0	100	100	100		0	0	0	0
DE	DE40	DE40A	Oberhavel	0	10	0	0	0	0	0	0	0	0	0.25	0	0		0	0	0	0	0	0	0	0	0	0	0	0		0	100	100	100		0	0	0	0
DE	DE40	DE40B	Oberspreewald-Lausitz	0	10	0	0	0	0	0	0	0	0	0.25	0	0		0	0	0	0	0	0	0	0	0	0	0	0		0	100	100	100		0	0	0	0
DE	DE40	DE40C	Oder-Spree	0	10	0	0	0	93.3333	0	100	0	100	0.25	0	0		0	0	0	0	0	0	0	0	0	0	0	0		0	100	100	100		0	0	0	0
DE	DE40	DE40D	Ostprignitz-Ruppin	0	10	0	0	0	0	0	0	0	0	0.25	0	0		0	0	0	0	0	0	0	0	0	0	0	0		0	100	100	100		0	0	0	0
DE	DE40	DE40E	Potsdam-Mittelmark	0	10	0	0	0	18.7633	0	71.855	0	100	0.25	0	0		0	0	0	0	0	0	0	0	0	0	0	0		0	100	100	100		0	0	0	0
DE	DE40	DE40F	Prignitz	0	10	0	0	0	0	0	0	0	0	0.25	0	0		0	0	0	0	0	0	0	0	0	0	0	0		0	100	100	100		0	0	0	0
DE	DE40	DE40G	Spree-Neisse	0	10	0	0	0	100	0	100	0	100	0.25	0	0		0	0	0	0	0	0	0	0	0	0	0	0		0	100	100	100		0	0	0	0
DE	DE40	DE40H	Teltow-Flaming	0	10	0	0	0	100	0	100	0	100	0.25	0	0		0	0	0	0	0	0	0	0	0	0	0	0		0	100	100	100		0	0	0	0
DE	DE40	DE40I	Uckermark	0	10	0	0	0	100	0	100	0	100	0.25	0	0		0	0	0	0	0	0	0	0	0	0	0	0		0	100	100	100		0	0	0	0
DE	DE50	DE501	Bremen, Kreisfreie Stadt	0	10	0	0	0	0	0	0	0	0	0.25	0	0		0	0	0	0	0	0	0	0	0	0	0	0		0	100	100	100		0	0	0	0
DE	DE50	DE502	Bremerhaven, Kreisfreie Stadt	0	10	0	0	0	0	0	0	0	0	0.25	0	0		0	0	0	0	0	0	0	0	0	0	0	0		0	100	100	100		0	0	0	0
DE	DE60	DE600	Hamburg	0	10	0	0	0	0	0	17.0029	0	3.45821	0.25	0	0		0	0	0	0	0	0	0	0	0	0	0	0		0	100	100	100		0	0	0	0
DE	DE71	DE711	Darmstadt, Kreisfreie Stadt	0	10	0	0	0	100	0	100	0	100	0.25	0	0		0	0	0	0	0	0	0	0	0	0	0	0		0	100	100	100		0	0	0	0
DE	DE71	DE712	Frankfurt am Main, Kreisfreie Stadt	0	10	0	0	0	100	0	100	0	100	0.25	0	0		0	0	0	0	0	0	0	0	0	0	0	0		0	100	100	100		0	0	0	0
DE	DE71	DE713	Offenbach am Main, Kreisfreie Stadt	0	10	0	0	0	100	0	100	0	100	0.25	0	0		0	0	0	0	0	0	0	0	0	0	0	0		0	100	100	100		0	0	0	0
DE	DE71	DE714	Wiesbaden, Kreisfreie Stadt	0	10	0	0	0	91.9283	0	69.9552	0	63.6771	0.25	0	0		0	0	0	0	0	0	0	0	0	0	0	0		0	100	100	100		0	0	0	0
DE	DE71	DE715	Bergstrasse	0	10	0	0	0	100	0	100	0	100	0.25	0	0		0	0	0	0	0	0	0	0	0	0	0	0		0	100	100	100		0	0	0	0
DE	DE71	DE716	Darmstadt-Dieburg	0	10	0	0	0	100	0	100	0	100	0.25	0	0		0	0	0	0	0	0	0	0	0	0	0	0		0	100	100	100		0	0	0	0
DE	DE71	DE717	Gross-Gerau	0	10	0	0	0	100	0	100	0	100	0.25	0	0		0	0	0	0	0	0	0	0	0	0	0	0		0	100	100	100		0	0	0	0
DE	DE71	DE718	Hochtaunuskreis	0	10	0	0	0	100	0	100	0	100	0.25	0	0		0	0	0	0	0	0	0	0	0	0	0	0		0	100	100	100		0	0	0	0
DE	DE71	DE719	Main-Kinzig-Kreis	0	10	0	0	0	100	0	100	0	100	0.25	0	0		0	0	0	0	0	0	0	0	0	0	0	0		0	100	100	100		0	0	0	0
DE	DE71	DE71A	Main-Taunus-Kreis	0	10	0	0	0	100	0	100	0	100	0.25	0	0		0	0	0	0	0	0	0	0	0	0	0	0		0	100	100	100		0	0	0	0
DE	DE71	DE71B	Odenwaldkreis	0	10	0	0	0	0	0	0	0	0	0.25	0	0		0	0	0	0	0	0	0	0	0	0	0	0		0	100	100	100		0	0	0	0
DE	DE71	DE71C	Offenbach, Landkreis	0	10	0	0	0	100	0	100	0	100	0.25	0	0		0	0	0	0	0	0	0	0	0	0	0	0		0	100	100	100		0	0	0	0
DE	DE71	DE71D	Rheingau-Taunus-Kreis	0	10	0	0	0	8.51064	0	10.9574	0	6.48936	0.25	0	0		0	0	0	0	0	0	0	0	0	0	0	0		0	100	100	100		0	0	0	0
DE	DE71	DE71E	Wetteraukreis	0	10	0	0	0	100	0	100	0	100	0.25	0	0		0	0	0	0	0	0	0	0	0	0	0	0		0	100	100	100		0	0	0	0
DE	DE72	DE721	Giessen, Landkreis	0	10	0	0	0	100	0	100	0	100	0.25	0	0		0	0	0	0	0	0	0	0	0	0	0	0		0	100	100	100		0	0	0	0
DE	DE72	DE722	Lahn-Dill-Kreis	0	10	0	0	0	0	0	0	0	0	0.25	0	0		0	0	0	0	0	0	0	0	0	0	0	0		0	100	100	100		0	0	0	0
DE	DE72	DE723	Limburg-Weilburg	0	10	0	0	0	0	0	0	0	0	0.25	0	0		0	0	0	0	0	0	0	0	0	0	0	0		0	100	100	100		0	0	0	0
DE	DE72	DE724	Marburg-Biedenkopf	0	10	0	0	0	0	0	0	0	0	0.25	0	0		0	0	0	0	0	0	0	0	0	0	0	0		0	100	100	100		0	0	0	0
DE	DE72	DE725	Vogelsbergkreis	0	10	0	0	0	0	0	0	0	0	0.25	0	0		0	0	0	0	0	0	0	0	0	0	0	0		0	100	100	100		0	0	0	0
DE	DE73	DE731	Kassel, Kreisfreie Stadt	0	10	0	0	0	0	0	0	0	0	0.25	0	0		0	0	0	0	0	0	0	0	0	0	0	0		0	100	100	100		0	0	0	0
DE	DE73	DE732	Fulda	0	10	0	0	0	0	0	0	0	0	0.25	0	0		0	0	0	0	0	0	0	0	0	0	0	0		0	100	100	100		0	0	0	0
DE	DE73	DE733	Hersfeld-Rotenburg	0	10	0	0	0	0	0	0	0	0	0.25	0	0		0	0	0	0	0	0	0	0	0	0	0	0		0	100	100	100		0	0	0	0
DE	DE73	DE734	Kassel, Landkreis	0	10	0	0	0	100	0	100	0	100	0.25	0	0		0	0	0	0	0	0	0	0	0	0	0	0		0	100	100	100		0	0	0	0
DE	DE73	DE735	Schwalm-Eder-Kreis	0	10	0	0	0	0	0	0	0	0	0.25	0	0		0	0	0	0	0	0	0	0	0	0	0	0		0	100	100	100		0	0	0	0
DE	DE73	DE736	Waldeck-Frankenberg	0	10	0	0	0	100	0	100	0	100	0.25	0	0		0	0	0	0	0	0	0	0	0	0	0	0		0	100	100	100		0	0	0	0
DE	DE73	DE737	Werra-Meissner-Kreis	0	10	0	0	0	100	0	100	0	100	0.25	0	0		0	0	0	0	0	0	0	0	0	0	0	0		0	100	100	100		0	0	0	0
DE	DE80	DE803	Rostock, Kreisfreie Stadt	0	10	0	0	0	100	0	100	0	100	0.25	0	0		0	0	0	0	0	0	0	0	0	0	0	0		0	100	100	100		0	0	0	0
DE	DE80	DE804	Schwerin, Kreisfreie Stadt	0	10	0	0	0	0	0	0	0	0	0.25	0	0		0	0	0	0	0	0	0	0	0	0	0	0		0	100	100	100		0	0	0	0
DE	DE80	DE80J	Mecklenburgische Seenplatte	0	10	0	0	0	100	0	100	0	100	0.25	0	0		0	0	0	0	0	0	0	0	0	0	0	0		0	100	100	100		0	0	0	0
DE	DE80	DE80K	Landkreis Rostock	0	10	0	0	0	100	0	100	0	100	0.25	0	0		0	0	0	0	0	0	0	0	0	0	0	0		0	100	100	100		0	0	0	0
DE	DE80	DE80L	Vorpommern-Rugen	0	10	0	0	0	100	0	100	0	100	0.25	0	0		0	0	0	0	0	0	0	0	0	0	0	0		0	100	100	100		0	0	0	0
DE	DE80	DE80M	Nordwestmecklenburg	0	10	0	0	0	0	0	0	0	0	0.25	0	0		0	0	0	0	0	0	0	0	0	0	0	0		0	100	100	100		0	0	0	0
DE	DE80	DE80N	Vorpommern-Greifswald	0	10	0	0	0	100	0	100	0	100	0.25	0	0		0	0	0	0	0	0	0	0	0	0	0	0		0	100	100	100		0	0	0	0
DE	DE80	DE80O	Ludwigslust-Parchim	0	10	0	0	0	52.1739	0	100	0	100	0.25	0	0		0	0	0	0	0	0	0	0	0	0	0	0		0	100	100	100		0	0	0	0
DE	DE91	DE911	Braunschweig, Kreisfreie Stadt	0	10	0	0	0	0	0	0	0	0	0.25	0	0		0	0	0	0	0	0	0	0	0	0	0	0		0	100	100	100		0	0	0	0
DE	DE91	DE912	Salzgitter, Kreisfreie Stadt	0	10	0	0	0	0	0	0	0	0	0.25	0	0		0	0	0	0	0	0	0	0	0	0	0	0		0	100	100	100		0	0	0	0
DE	DE91	DE913	Wolfsburg, Kreisfreie Stadt	0	10	0	0	0	0	0	0	0	0	0.25	0	0		0	0	0	0	0	0	0	0	0	0	0	0		0	100	100	100		0	0	0	0
DE	DE91	DE914	Gifhorn	0	10	0	0	0	0	0	0	0	0	0.25	0	0		0	0	0	0	0	0	0	0	0	0	0	0		0	100	100	100		0	0	0	0
DE	DE91	DE915	Gottingen	0	10	0	0	0	0	0	0	0	0	0.25	0	0		0	0	0	0	0	0	0	0	0	0	0	0		0	100	100	100		0	0	0	0
DE	DE91	DE916	Goslar	0	10	0	0	0	0	0	0	0	0	0.25	0	0		0	0	0	0	0	0	0	0	0	0	0	0		0	100	100	100		0	0	0	0
DE	DE91	DE917	Helmstedt	0	10	0	0	0	0	0	0	0	0	0.25	0	0		0	0	0	0	0	0	0	0	0	0	0	0		0	100	100	100		0	0	0	0
DE	DE91	DE918	Northeim	0	10	0	0	0	0	0	0	0	0	0.25	0	0		0	0	0	0	0	0	0	0	0	0	0	0		0	100	100	100		0	0	0	0
DE	DE91	DE919	Osterode am Harz	0	10	0	0	0	0	0	0	0	0	0.25	0	0		0	0	0	0	0	0	0	0	0	0	0	0		0	100	100	100		0	0	0	0
DE	DE91	DE91A	Peine	0	10	0	0	0	0	0	0	0	0	0.25	0	0		0	0	0	0	0	0	0	0	0	0	0	0		0	100	100	100		0	0	0	0
DE	DE91	DE91B	Wolfenbuttel	0	10	0	0	0	0	0	0	0	0	0.25	0	0		0	0	0	0	0	0	0	0	0	0	0	0		0	100	100	100		0	0	0	0
DE	DE92	DE922	Diepholz	0	10	0	0	0	0	0	0	0	0	0.25	0	0		0	0	0	0	0	0	0	0	0	0	0	0		0	100	100	100		0	0	0	0
DE	DE92	DE923	Hameln-Pyrmont	0	10	0	0	0	0	0	0	0	0	0.25	0	0		0	0	0	0	0	0	0	0	0	0	0	0		0	100	100	100		0	0	0	0
DE	DE92	DE925	Hildesheim	0	10	0	0	0	0	0	0	0	0	0.25	0	0		0	0	0	0	0	0	0	0	0	0	0	0		0	100	100	100		0	0	0	0
DE	DE92	DE926	Holzminden	0	10	0	0	0	0	0	0	0	0	0.25	0	0		0	0	0	0	0	0	0	0	0	0	0	0		0	100	100	100		0	0	0	0
DE	DE92	DE927	Nienburg (Weser)	0	10	0	0	0	0	0	0	0	0	0.25	0	0		0	0	0	0	0	0	0	0	0	0	0	0		0	100	100	100		0	0	0	0
DE	DE92	DE928	Schaumburg	0	10	0	0	0	0	0	0	0	0	0.25	0	0		0	0	0	0	0	0	0	0	0	0	0	0		0	100	100	100		0	0	0	0
DE	DE92	DE929	Region Hannover	0	10	0	0	0	0	0	0	0	0	0.25	0	0		0	0	0	0	0	0	0	0	0	0	0	0		0	100	100	100		0	0	0	0
DE	DE93	DE931	Celle	0	10	0	0	0	0	0	0	0	0	0.25	0	0		0	0	0	0	0	0	0	0	0	0	0	0		0	100	100	100		0	0	0	0
DE	DE93	DE932	Cuxhaven	0	10	0	0	0	100	0	100	0	100	0.25	0	0		0	0	0	0	0	0	0	0	0	0	0	0		0	100	100	100		0	0	0	0
DE	DE93	DE933	Harburg	0	10	0	0	0	47.7778	0	69.4444	0	69.4444	0.25	0	0		0	0	0	0	0	0	0	0	0	0	0	0		0	100	100	100		0	0	0	0
DE	DE93	DE934	Luchow-Dannenberg	0	10	0	0	0	0	0	0	0	0	0.25	0	0		0	0	0	0	0	0	0	0	0	0	0	0		0	100	100	100		0	0	0	0
DE	DE93	DE935	Luneburg, Landkreis	0	10	0	0	0	100	0	100	0	100	0.25	0	0		0	0	0	0	0	0	0	0	0	0	0	0		0	100	100	100		0	0	0	0
DE	DE93	DE936	Osterholz	0	10	0	0	0	0	0	0	0	0	0.25	0	0		0	0	0	0	0	0	0	0	0	0	0	0		0	100	100	100		0	0	0	0
DE	DE93	DE937	Rotenburg (Wumme)	0	10	0	0	0	0	0	0	0	0	0.25	0	0		0	0	0	0	0	0	0	0	0	0	0	0		0	100	100	100		0	0	0	0
DE	DE93	DE938	Heidekreis	0	10	0	0	0	0	0	0	0	0	0.25	0	0		0	0	0	0	0	0	0	0	0	0	0	0		0	100	100	100		0	0	0	0
DE	DE93	DE939	Stade	0	10	0	0	0	2.36931	0	3.83603	0	2.18127	0.25	0	0		0	0	0	0	0	0	0	0	0	0	0	0		0	100	100	100		0	0	0	0
DE	DE93	DE93A	Uelzen	0	10	0	0	0	0	0	0	0	0	0.25	0	0		0	0	0	0	0	0	0	0	0	0	0	0		0	100	100	100		0	0	0	0
DE	DE93	DE93B	Verden	0	10	0	0	0	0	0	0	0	0	0.25	0	0		0	0	0	0	0	0	0	0	0	0	0	0		0	100	100	100		0	0	0	0
DE	DE94	DE941	Delmenhorst, Kreisfreie Stadt	0	10	0	0	0	0	0	0	0	0	0.25	0	0		0	0	0	0	0	0	0	0	0	0	0	0		0	100	100	100		0	0	0	0
DE	DE94	DE942	Emden, Kreisfreie Stadt	0	10	0	0	0	0	0	0	0	0	0.25	0	0		0	0	0	0	0	0	0	0	0	0	0	0		0	100	100	100		0	0	0	0
DE	DE94	DE943	Oldenburg (Oldenburg), Kreisfreie Stadt	0	10	0	0	0	0	0	0	0	0	0.25	0	0		0	0	0	0	0	0	0	0	0	0	0	0		0	100	100	100		0	0	0	0
DE	DE94	DE944	Osnabruck, Kreisfreie Stadt	0	10	0	0	0	0	0	0	0	0	0.25	0	0		0	0	0	0	0	0	0	0	0	0	0	0		0	100	100	100		0	0	0	0
DE	DE94	DE945	Wilhelmshaven, Kreisfreie Stadt	0	10	0	0	0	0	0	0	0	0	0.25	0	0		0	0	0	0	0	0	0	0	0	0	0	0		0	100	100	100		0	0	0	0
DE	DE94	DE946	Ammerland	0	10	0	0	0	0	0	0	0	0	0.25	0	0		0	0	0	0	0	0	0	0	0	0	0	0		0	100	100	100		0	0	0	0
DE	DE94	DE947	Aurich	0	10	0	0	0	0	0	0	0	0	0.25	0	0		0	0	0	0	0	0	0	0	0	0	0	0		0	100	100	100		0	0	0	0
DE	DE94	DE948	Cloppenburg	0	10	0	0	0	0	0	0	0	0	0.25	0	0		0	0	0	0	0	0	0	0	0	0	0	0		0	100	100	100		0	0	0	0
DE	DE94	DE949	Emsland	0	10	0	0	0	0	0	0	0	0	0.25	0	0		0	0	0	0	0	0	0	0	0	0	0	0		0	100	100	100		0	0	0	0
DE	DE94	DE94A	Friesland (DE)	0	10	0	0	0	0	0	0	0	0	0.25	0	0		0	0	0	0	0	0	0	0	0	0	0	0		0	100	100	100		0	0	0	0
DE	DE94	DE94B	Grafschaft Bentheim	0	10	0	0	0	0	0	0	0	0	0.25	0	0		0	0	0	0	0	0	0	0	0	0	0	0		0	100	100	100		0	0	0	0
DE	DE94	DE94C	Leer	0	10	0	0	0	0	0	0	0	0	0.25	0	0		0	0	0	0	0	0	0	0	0	0	0	0		0	100	100	100		0	0	0	0
DE	DE94	DE94D	Oldenburg, Landkreis	0	10	0	0	0	0	0	0	0	0	0.25	0	0		0	0	0	0	0	0	0	0	0	0	0	0		0	100	100	100		0	0	0	0
DE	DE94	DE94E	Osnabruck, Landkreis	0	10	0	0	0	0	0	0	0	0	0.25	0	0		0	0	0	0	0	0	0	0	0	0	0	0		0	100	100	100		0	0	0	0
DE	DE94	DE94F	Vechta	0	10	0	0	0	0	0	0	0	0	0.25	0	0		0	0	0	0	0	0	0	0	0	0	0	0		0	100	100	100		0	0	0	0
DE	DE94	DE94G	Wesermarsch	0	10	0	0	0	0	0	0	0	0	0.25	0	0		0	0	0	0	0	0	0	0	0	0	0	0		0	100	100	100		0	0	0	0
DE	DE94	DE94H	Wittmund	0	10	0	0	0	0	0	0	0	0	0.25	0	0		0	0	0	0	0	0	0	0	0	0	0	0		0	100	100	100		0	0	0	0
DE	DEA1	DEA11	Dusseldorf, Kreisfreie Stadt	0	10	0	0	0	0	0	0	0	0	0.25	0	0		0	0	0	0	0	0	0	0	0	0	0	0		0	100	100	100		0	0	0	0
DE	DEA1	DEA12	Duisburg, Kreisfreie Stadt	0	10	0	0	0	0	0	0	0	0	0.25	0	0		0	0	0	0	0	0	0	0	0	0	0	0		0	100	100	100		0	0	0	0
DE	DEA1	DEA13	Essen, Kreisfreie Stadt	0	10	0	0	0	0	0	0	0	0	0.25	0	0		0	0	0	0	0	0	0	0	0	0	0	0		0	100	100	100		0	0	0	0
DE	DEA1	DEA14	Krefeld, Kreisfreie Stadt	0	10	0	0	0	0	0	0	0	0	0.25	0	0		0	0	0	0	0	0	0	0	0	0	0	0		0	100	100	100		0	0	0	0
DE	DEA1	DEA15	Monchengladbach, Kreisfreie Stadt	0	10	0	0	0	0	0	0	0	0	0.25	0	0		0	0	0	0	0	0	0	0	0	0	0	0		0	100	100	100		0	0	0	0
DE	DEA1	DEA16	Mulheim an der Ruhr,Kreisfreie Stadt	0	10	0	0	0	0	0	0	0	0	0.25	0	0		0	0	0	0	0	0	0	0	0	0	0	0		0	100	100	100		0	0	0	0
DE	DEA1	DEA17	Oberhausen, Kreisfreie Stadt	0	10	0	0	0	0	0	0	0	0	0.25	0	0		0	0	0	0	0	0	0	0	0	0	0	0		0	100	100	100		0	0	0	0
DE	DEA1	DEA18	Remscheid, Kreisfreie Stadt	0	10	0	0	0	0	0	0	0	0	0.25	0	0		0	0	0	0	0	0	0	0	0	0	0	0		0	100	100	100		0	0	0	0
DE	DEA1	DEA19	Solingen, Kreisfreie Stadt	0	10	0	0	0	0	0	0	0	0	0.25	0	0		0	0	0	0	0	0	0	0	0	0	0	0		0	100	100	100		0	0	0	0
DE	DEA1	DEA1A	Wuppertal, Kreisfreie Stadt	0	10	0	0	0	0	0	0	0	0	0.25	0	0		0	0	0	0	0	0	0	0	0	0	0	0		0	100	100	100		0	0	0	0
DE	DEA1	DEA1B	Kleve	0	10	0	0	0	100	0	100	0	100	0.25	0	0		0	0	0	0	0	0	0	0	0	0	0	0		0	100	100	100		0	0	0	0
DE	DEA1	DEA1C	Mettmann	0	10	0	0	0	0	0	0	0	0	0.25	0	0		0	0	0	0	0	0	0	0	0	0	0	0		0	100	100	100		0	0	0	0
DE	DEA1	DEA1D	Rhein-Kreis Neuss	0	10	0	0	0	0	0	0	0	0	0.25	0	0		0	0	0	0	0	0	0	0	0	0	0	0		0	100	100	100		0	0	0	0
DE	DEA1	DEA1E	Viersen	0	10	0	0	0	0	0	0	0	0	0.25	0	0		0	0	0	0	0	0	0	0	0	0	0	0		0	100	100	100		0	0	0	0
DE	DEA1	DEA1F	Wesel	0	10	0	0	0	100	0	100	0	100	0.25	0	0		0	0	0	0	0	0	0	0	0	0	0	0		0	100	100	100		0	0	0	0
DE	DEA2	DEA22	Bonn, Kreisfreie Stadt	0	10	0	0	0	95.8333	0	95.8333	0	100	0.25	0	0		0	0	0	0	0	0	0	0	0	0	0	0		0	100	100	100		0	0	0	0
DE	DEA2	DEA23	Koln, Kreisfreie Stadt	0	10	0	0	0	0	0	0	0	0	0.25	0	0		0	0	0	0	0	0	0	0	0	0	0	0		0	100	100	100		0	0	0	0
DE	DEA2	DEA24	Leverkusen, Kreisfreie Stadt	0	10	0	0	0	0	0	0	0	0	0.25	0	0		0	0	0	0	0	0	0	0	0	0	0	0		0	100	100	100		0	0	0	0
DE	DEA2	DEA26	Duren	0	10	0	0	0	0	0	0	0	0	0.25	0	0		0	0	0	0	0	0	0	0	0	0	0	0		0	100	100	100		0	0	0	0
DE	DEA2	DEA27	Rhein-Erft-Kreis	0	10	0	0	0	0	0	0	0	0	0.25	0	0		0	0	0	0	0	0	0	0	0	0	0	0		0	100	100	100		0	0	0	0
DE	DEA2	DEA28	Euskirchen	0	10	0	0	0	0	0	0	0	0	0.25	0	0		0	0	0	0	0	0	0	0	0	0	0	0		0	100	100	100		0	0	0	0
DE	DEA2	DEA29	Heinsberg	0	10	0	0	0	100	0	100	0	100	0.25	0	0		0	0	0	0	0	0	0	0	0	0	0	0		0	100	100	100		0	0	0	0
DE	DEA2	DEA2A	Oberbergischer Kreis	0	10	0	0	0	0	0	0	0	0	0.25	0	0		0	0	0	0	0	0	0	0	0	0	0	0		0	100	100	100		0	0	0	0
DE	DEA2	DEA2B	Rheinisch-Bergischer Kreis	0	10	0	0	0	0	0	0	0	0	0.25	0	0		0	0	0	0	0	0	0	0	0	0	0	0		0	100	100	100		0	0	0	0
DE	DEA2	DEA2C	Rhein-Sieg-Kreis	0	10	0	0	0	3.7037	0	7.18954	0	100	0.25	0	0		0	0	0	0	0	0	0	0	0	0	0	0		0	100	100	100		0	0	0	0
DE	DEA2	DEA2D	Stadteregion Aachen	0	10	0	0	0	0	0	0	0	0	0.25	0	0		0	0	0	0	0	0	0	0	0	0	0	0		0	100	100	100		0	0	0	0
DE	DEA3	DEA31	Bottrop, Kreisfreie Stadt	0	10	0	0	0	0	0	0	0	0	0.25	0	0		0	0	0	0	0	0	0	0	0	0	0	0		0	100	100	100		0	0	0	0
DE	DEA3	DEA32	Gelsenkirchen, Kreisfreie Stadt	0	10	0	0	0	0	0	0	0	0	0.25	0	0		0	0	0	0	0	0	0	0	0	0	0	0		0	100	100	100		0	0	0	0
DE	DEA3	DEA33	Munster, Kreisfreie Stadt	0	10	0	0	0	0	0	0	0	0	0.25	0	0		0	0	0	0	0	0	0	0	0	0	0	0		0	100	100	100		0	0	0	0
DE	DEA3	DEA34	Borken	0	10	0	0	0	0	0	0	0	0	0.25	0	0		0	0	0	0	0	0	0	0	0	0	0	0		0	100	100	100		0	0	0	0
DE	DEA3	DEA35	Coesfeld	0	10	0	0	0	0	0	0	0	0	0.25	0	0		0	0	0	0	0	0	0	0	0	0	0	0		0	100	100	100		0	0	0	0
DE	DEA3	DEA36	Recklinghausen	0	10	0	0	0	0	0	0	0	0	0.25	0	0		0	0	0	0	0	0	0	0	0	0	0	0		0	100	100	100		0	0	0	0
DE	DEA3	DEA37	Steinfurt	0	10	0	0	0	0	0	0	0	0	0.25	0	0		0	0	0	0	0	0	0	0	0	0	0	0		0	100	100	100		0	0	0	0
DE	DEA3	DEA38	Warendorf	0	10	0	0	0	0	0	0	0	0	0.25	0	0		0	0	0	0	0	0	0	0	0	0	0	0		0	100	100	100		0	0	0	0
DE	DEA4	DEA41	Bielefeld, Kreisfreie Stadt	0	10	0	0	0	0	0	0	0	0	0.25	0	0		0	0	0	0	0	0	0	0	0	0	0	0		0	100	100	100		0	0	0	0
DE	DEA4	DEA42	Gutersloh	0	10	0	0	0	0	0	0	0	0	0.25	0	0		0	0	0	0	0	0	0	0	0	0	0	0		0	100	100	100		0	0	0	0
DE	DEA4	DEA43	Herford	0	10	0	0	0	0	0	0	0	0	0.25	0	0		0	0	0	0	0	0	0	0	0	0	0	0		0	100	100	100		0	0	0	0
DE	DEA4	DEA44	Hoxter	0	10	0	0	0	0	0	0	0	0	0.25	0	0		0	0	0	0	0	0	0	0	0	0	0	0		0	100	100	100		0	0	0	0
DE	DEA4	DEA45	Lippe	0	10	0	0	0	0	0	0	0	0	0.25	0	0		0	0	0	0	0	0	0	0	0	0	0	0		0	100	100	100		0	0	0	0
DE	DEA4	DEA46	Minden-Lubbecke	0	10	0	0	0	0	0	0	0	0	0.25	0	0		0	0	0	0	0	0	0	0	0	0	0	0		0	100	100	100		0	0	0	0
DE	DEA4	DEA47	Paderborn	0	10	0	0	0	0	0	0	0	0	0.25	0	0		0	0	0	0	0	0	0	0	0	0	0	0		0	100	100	100		0	0	0	0
DE	DEA5	DEA51	Bochum, Kreisfreie Stadt	0	10	0	0	0	0	0	0	0	0	0.25	0	0		0	0	0	0	0	0	0	0	0	0	0	0		0	100	100	100		0	0	0	0
DE	DEA5	DEA52	Dortmund, Kreisfreie Stadt	0	10	0	0	0	0	0	0	0	0	0.25	0	0		0	0	0	0	0	0	0	0	0	0	0	0		0	100	100	100		0	0	0	0
DE	DEA5	DEA53	Hagen, Kreisfreie Stadt	0	10	0	0	0	0	0	0	0	0	0.25	0	0		0	0	0	0	0	0	0	0	0	0	0	0		0	100	100	100		0	0	0	0
DE	DEA5	DEA54	Hamm, Kreisfreie Stadt	0	10	0	0	0	0	0	0	0	0	0.25	0	0		0	0	0	0	0	0	0	0	0	0	0	0		0	100	100	100		0	0	0	0
DE	DEA5	DEA55	Herne, Kreisfreie Stadt	0	10	0	0	0	0	0	0	0	0	0.25	0	0		0	0	0	0	0	0	0	0	0	0	0	0		0	100	100	100		0	0	0	0
DE	DEA5	DEA56	Ennepe-Ruhr-Kreis	0	10	0	0	0	0	0	0	0	0	0.25	0	0		0	0	0	0	0	0	0	0	0	0	0	0		0	100	100	100		0	0	0	0
DE	DEA5	DEA57	Hochsauerlandkreis	0	10	0	0	0	0	0	0	0	0	0.25	0	0		0	0	0	0	0	0	0	0	0	0	0	0		0	100	100	100		0	0	0	0
DE	DEA5	DEA58	Markischer Kreis	0	10	0	0	0	0	0	0	0	0	0.25	0	0		0	0	0	0	0	0	0	0	0	0	0	0		0	100	100	100		0	0	0	0
DE	DEA5	DEA59	Olpe	0	10	0	0	0	0	0	0	0	0	0.25	0	0		0	0	0	0	0	0	0	0	0	0	0	0		0	100	100	100		0	0	0	0
DE	DEA5	DEA5A	Siegen-Wittgenstein	0	10	0	0	0	0	0	0	0	0	0.25	0	0		0	0	0	0	0	0	0	0	0	0	0	0		0	100	100	100		0	0	0	0
DE	DEA5	DEA5B	Soest	0	10	0	0	0	0	0	0	0	0	0.25	0	0		0	0	0	0	0	0	0	0	0	0	0	0		0	100	100	100		0	0	0	0
DE	DEA5	DEA5C	Unna	0	10	0	0	0	0	0	0	0	0	0.25	0	0		0	0	0	0	0	0	0	0	0	0	0	0		0	100	100	100		0	0	0	0
DE	DEB1	DEB11	Koblenz, Kreisfreie Stadt	0	10	0	0	0	100	0	100	0	100	0.25	0	0		0	0	0	0	0	0	0	0	0	0	0	0		0	100	100	100		0	0	0	0
DE	DEB1	DEB12	Ahrweiler	0	10	0	0	0	47.7876	0	61.9469	0	100	0.25	0	0		0	0	0	0	0	0	0	0	0	0	0	0		0	100	100	100		0	0	0	0
DE	DEB1	DEB13	Altenkirchen (Westerwald)	0	10	0	0	0	0	0	0	0	0	0.25	0	0		0	0	0	0	0	0	0	0	0	0	0	0		0	100	100	100		0	0	0	0
DE	DEB1	DEB14	Bad Kreuznach	0	10	0	0	0	44.4444	0	55.5556	0	0	0.25	0	0		0	0	0	0	0	0	0	0	0	0	0	0		0	100	100	100		0	0	0	0
DE	DEB1	DEB15	Birkenfeld	0	10	0	0	0	0	0	0	0	0	0.25	0	0		0	0	0	0	0	0	0	0	0	0	0	0		0	100	100	100		0	0	0	0
DE	DEB1	DEB16	Cochem-Zell	0	10	0	0	0	100	0	100	0	100	0.25	0	0		0	0	0	0	0	0	0	0	0	0	0	0		0	100	100	100		0	0	0	0
DE	DEB1	DEB17	Mayen-Koblenz	0	10	0	0	0	100	0	100	0	100	0.25	0	0		0	0	0	0	0	0	0	0	0	0	0	0		0	100	100	100		0	0	0	0
DE	DEB1	DEB18	Neuwied	0	10	0	0	0	100	0	100	0	100	0.25	0	0		0	0	0	0	0	0	0	0	0	0	0	0		0	100	100	100		0	0	0	0
DE	DEB1	DEB19	Rhein-Hunsruck-Kreis	0	10	0	0	0	100	0	100	0	100	0.25	0	0		0	0	0	0	0	0	0	0	0	0	0	0		0	100	100	100		0	0	0	0
DE	DEB1	DEB1A	Rhein-Lahn-Kreis	0	10	0	0	0	100	0	100	0	100	0.25	0	0		0	0	0	0	0	0	0	0	0	0	0	0		0	100	100	100		0	0	0	0
DE	DEB1	DEB1B	Westerwaldkreis	0	10	0	0	0	0	0	0	0	0	0.25	0	0		0	0	0	0	0	0	0	0	0	0	0	0		0	100	100	100		0	0	0	0
DE	DEB2	DEB21	Trier, Kreisfreie Stadt	0	10	0	0	0	100	0	100	0	100	0.25	0	0		0	0	0	0	0	0	0	0	0	0	0	0		0	100	100	100		0	0	0	0
DE	DEB2	DEB22	Bernkastel-Wittlich	0	10	0	0	0	100	0	100	0	100	0.25	0	0		0	0	0	0	0	0	0	0	0	0	0	0		0	100	100	100		0	0	0	0
DE	DEB2	DEB23	Eifelkreis Bitburg-Prum	0	10	0	0	0	0	0	0	0	0	0.25	0	0		0	0	0	0	0	0	0	0	0	0	0	0		0	100	100	100		0	0	0	0
DE	DEB2	DEB24	Vulkaneifel	0	10	0	0	0	0	0	0	0	0	0.25	0	0		0	0	0	0	0	0	0	0	0	0	0	0		0	100	100	100		0	0	0	0
DE	DEB2	DEB25	Trier-Saarburg	0	10	0	0	0	100	0	100	0	100	0.25	0	0		0	0	0	0	0	0	0	0	0	0	0	0		0	100	100	100		0	0	0	0
DE	DEB3	DEB31	Frankenthal (Pfalz), Kreisfreie Stadt	0	10	0	0	0	0	0	0	0	0	0.25	0	0		0	0	0	0	0	0	0	0	0	0	0	0		0	100	100	100		0	0	0	0
DE	DEB3	DEB32	Kaiserslautern, Kreisfreie Stadt	0	10	0	0	0	0	0	0	0	0	0.25	0	0		0	0	0	0	0	0	0	0	0	0	0	0		0	100	100	100		0	0	0	0
DE	DEB3	DEB33	Landau in der Pfalz, Kreisfreie Stadt	0	10	0	0	0	0.356506	0	0	0	0	0.25	0	0		0	0	0	0	0	0	0	0	0	0	0	0		0	100	100	100		0	0	0	0
DE	DEB3	DEB34	Ludwigshafen am Rhein, Kreisfreie Stadt	0	10	0	0	0	0	0	0	0	0	0.25	0	0		0	0	0	0	0	0	0	0	0	0	0	0		0	100	100	100		0	0	0	0
DE	DEB3	DEB35	Mainz, Kreisfreie Stadt	0	10	0	0	0	5.41516	0	18.7726	0	0	0.25	0	0		0	0	0	0	0	0	0	0	0	0	0	0		0	100	100	100		0	0	0	0
DE	DEB3	DEB36	Neustadt an der Weinstrasse, Kreisfreie Stadt	0	10	0	0	0	1.64835	0	0.3663	0	0	0.25	0	0		0	0	0	0	0	0	0	0	0	0	0	0		0	100	100	100		0	0	0	0
DE	DEB3	DEB37	Pirmasens, Kreisfreie Stadt	0	10	0	0	0	0	0	0	0	0	0.25	0	0		0	0	0	0	0	0	0	0	0	0	0	0		0	100	100	100		0	0	0	0
DE	DEB3	DEB38	Speyer, Kreisfreie Stadt	0	10	0	0	0	100	0	100	0	100	0.25	0	0		0	0	0	0	0	0	0	0	0	0	0	0		0	100	100	100		0	0	0	0
DE	DEB3	DEB39	Worms, Kreisfreie Stadt	0	10	0	0	0	4.61538	0	7.38462	0	0	0.25	0	0		0	0	0	0	0	0	0	0	0	0	0	0		0	100	100	100		0	0	0	0
DE	DEB3	DEB3A	Zweibrucken, Kreisfreie Stadt	0	10	0	0	0	100	0	100	0	100	0.25	0	0		0	0	0	0	0	0	0	0	0	0	0	0		0	100	100	100		0	0	0	0
DE	DEB3	DEB3B	Alzey-Worms	0	10	0	0	0	1.93548	0	4.88079	0	0	0.25	0	0		0	0	0	0	0	0	0	0	0	0	0	0		0	100	100	100		0	0	0	0
DE	DEB3	DEB3C	Bad Durkheim	0	10	0	0	0	0	0	0	0	0	0.25	0	0		0	0	0	0	0	0	0	0	0	0	0	0		0	100	100	100		0	0	0	0
DE	DEB3	DEB3D	Donnersbergkreis	0	10	0	0	0	57.9832	0	42.8571	0	23.5294	0.25	0	0		0	0	0	0	0	0	0	0	0	0	0	0		0	100	100	100		0	0	0	0
DE	DEB3	DEB3E	Germersheim	0	10	0	0	0	95.5882	0	97.0588	0	30.8824	0.25	0	0		0	0	0	0	0	0	0	0	0	0	0	0		0	100	100	100		0	0	0	0
DE	DEB3	DEB3F	Kaiserslautern, Landkreis	0	10	0	0	0	0	0	0	0	0	0.25	0	0		0	0	0	0	0	0	0	0	0	0	0	0		0	100	100	100		0	0	0	0
DE	DEB3	DEB3G	Kusel	0	10	0	0	0	100	0	100	0	100	0.25	0	0		0	0	0	0	0	0	0	0	0	0	0	0		0	100	100	100		0	0	0	0
DE	DEB3	DEB3H	Sudliche Weinstrasse	0	10	0	0	0	1.02941	0	5.22059	0	2.27941	0.25	0	0		0	0	0	0	0	0	0	0	0	0	0	0		0	100	100	100		0	0	0	0
DE	DEB3	DEB3I	Rhein-Pfalz-Kreis	0	10	0	0	0	33.3333	0	24.2424	0	0	0.25	0	0		0	0	0	0	0	0	0	0	0	0	0	0		0	100	100	100		0	0	0	0
DE	DEB3	DEB3J	Mainz-Bingen	0	10	0	0	0	3.8247	0	4.834	0	3.34661	0.25	0	0		0	0	0	0	0	0	0	0	0	0	0	0		0	100	100	100		0	0	0	0
DE	DEB3	DEB3K	Sudwestpfalz	0	10	0	0	0	100	0	100	0	100	0.25	0	0		0	0	0	0	0	0	0	0	0	0	0	0		0	100	100	100		0	0	0	0
DE	DEC0	DEC01	Regionalverband Saarbrucken	0	10	0	0	0	100	0	100	0	100	0.25	0	0		0	0	0	0	0	0	0	0	0	0	0	0		0	100	100	100		0	0	0	0
DE	DEC0	DEC02	Merzig-Wadern	0	10	0	0	0	100	0	100	0	100	0.25	0	0		0	0	0	0	0	0	0	0	0	0	0	0		0	100	100	100		0	0	0	0
DE	DEC0	DEC03	Neunkirchen	0	10	0	0	0	100	0	100	0	100	0.25	0	0		0	0	0	0	0	0	0	0	0	0	0	0		0	100	100	100		0	0	0	0
DE	DEC0	DEC04	Saarlouis	0	10	0	0	0	100	0	100	0	100	0.25	0	0		0	0	0	0	0	0	0	0	0	0	0	0		0	100	100	100		0	0	0	0
DE	DEC0	DEC05	Saarpfalz-Kreis	0	10	0	0	0	100	0	100	0	100	0.25	0	0		0	0	0	0	0	0	0	0	0	0	0	0		0	100	100	100		0	0	0	0
DE	DEC0	DEC06	St. Wendel	0	10	0	0	0	100	0	100	0	100	0.25	0	0		0	0	0	0	0	0	0	0	0	0	0	0		0	100	100	100		0	0	0	0
DE	DED2	DED21	Dresden, Kreisfreie Stadt	0	10	0	0	0	0	0	0	0	100	0.25	0	0		0	0	0	0	0	0	0	0	0	0	0	0		0	100	100	100		0	0	0	0
DE	DED2	DED2C	Bautzen	0	10	0	0	0	0	0	0	0	0	0.25	0	0		0	0	0	0	0	0	0	0	0	0	0	0		0	100	100	100		0	0	0	0
DE	DED2	DED2D	Gorlitz	0	10	0	0	0	100	0	100	0	100	0.25	0	0		0	0	0	0	0	0	0	0	0	0	0	0		0	100	100	100		0	0	0	0
DE	DED2	DED2E	Meissen	0	10	0	0	0	100	0	100	0	100	0.25	0	0		0	0	0	0	0	0	0	0	0	0	0	0		0	100	100	100		0	0	0	0
DE	DED2	DED2F	Sachsische Schweiz-Osterzgebirge	0	10	0	0	0	11.9149	0	12.1277	0	100	0.25	0	0		0	0	0	0	0	0	0	0	0	0	0	0		0	100	100	100		0	0	0	0
DE	DED4	DED41	Chemnitz, Kreisfreie Stadt	0	10	0	0	0	0	0	0	0	0	0.25	0	0		0	0	0	0	0	0	0	0	0	0	0	0		0	100	100	100		0	0	0	0
DE	DED4	DED42	Erzgebirgskreis	0	10	0	0	0	0	0	0	0	0	0.25	0	0		0	0	0	0	0	0	0	0	0	0	0	0		0	100	100	100		0	0	0	0
DE	DED4	DED43	Mittelsachsen	0	10	0	0	0	70.4762	0	100	0	100	0.25	0	0		0	0	0	0	0	0	0	0	0	0	0	0		0	100	100	100		0	0	0	0
DE	DED4	DED44	Vogtlandkreis	0	10	0	0	0	0	0	0	0	0	0.25	0	0		0	0	0	0	0	0	0	0	0	0	0	0		0	100	100	100		0	0	0	0
DE	DED4	DED45	Zwickau	0	10	0	0	0	100	0	100	0	100	0.25	0	0		0	0	0	0	0	0	0	0	0	0	0	0		0	100	100	100		0	0	0	0
DE	DED5	DED51	Leipzig, Kreisfreie Stadt	0	10	0	0	0	100	0	100	0	100	0.25	0	0		0	0	0	0	0	0	0	0	0	0	0	0		0	100	100	100		0	0	0	0
DE	DED5	DED52	Leipzig	0	10	0	0	0	7.40741	0	100	0	100	0.25	0	0		0	0	0	0	0	0	0	0	0	0	0	0		0	100	100	100		0	0	0	0
DE	DED5	DED53	Nordsachsen	0	10	0	0	0	31.2139	0	100	0	100	0.25	0	0		0	0	0	0	0	0	0	0	0	0	0	0		0	100	100	100		0	0	0	0
DE	DEE0	DEE01	Dessau-Rosslau, Kreisfreie Stadt	0	10	0	0	0	100	0	100	0	100	0.25	0	0		0	0	0	0	0	0	0	0	0	0	0	0		0	100	100	100		0	0	0	0
DE	DEE0	DEE02	Halle (Saale), Kreisfreie Stadt	0	10	0	0	0	100	0	100	0	100	0.25	0	0		0	0	0	0	0	0	0	0	0	0	0	0		0	100	100	100		0	0	0	0
DE	DEE0	DEE03	Magdeburg, Kreisfreie Stadt	0	10	0	0	0	0	0	0	0	0	0.25	0	0		0	0	0	0	0	0	0	0	0	0	0	0		0	100	100	100		0	0	0	0
DE	DEE0	DEE04	Altmarkkreis Salzwedel	0	10	0	0	0	0	0	0	0	0	0.25	0	0		0	0	0	0	0	0	0	0	0	0	0	0		0	100	100	100		0	0	0	0
DE	DEE0	DEE05	Anhalt-Bitterfeld	0	10	0	0	0	100	0	100	0	100	0.25	0	0		0	0	0	0	0	0	0	0	0	0	0	0		0	100	100	100		0	0	0	0
DE	DEE0	DEE06	Jerichower Land	0	10	0	0	0	0	0	0	0	0	0.25	0	0		0	0	0	0	0	0	0	0	0	0	0	0		0	100	100	100		0	0	0	0
DE	DEE0	DEE07	Borde	0	10	0	0	0	100	0	100	0	100	0.25	0	0		0	0	0	0	0	0	0	0	0	0	0	0		0	100	100	100		0	0	0	0
DE	DEE0	DEE08	Burgenland (DE)	0	10	0	0	0	100	0	100	0	100	0.25	0	0		0	0	0	0	0	0	0	0	0	0	0	0		0	100	100	100		0	0	0	0
DE	DEE0	DEE09	Harz	0	10	0	0	0	100	0	100	0	100	0.25	0	0		0	0	0	0	0	0	0	0	0	0	0	0		0	100	100	100		0	0	0	0
DE	DEE0	DEE0A	Mansfeld-Sudharz	0	10	0	0	0	100	0	100	0	100	0.25	0	0		0	0	0	0	0	0	0	0	0	0	0	0		0	100	100	100		0	0	0	0
DE	DEE0	DEE0B	Saalekreis	0	10	0	0	0	100	0	100	0	100	0.25	0	0		0	0	0	0	0	0	0	0	0	0	0	0		0	100	100	100		0	0	0	0
DE	DEE0	DEE0C	Salzlandkreis	0	10	0	0	0	100	0	100	0	100	0.25	0	0		0	0	0	0	0	0	0	0	0	0	0	0		0	100	100	100		0	0	0	0
DE	DEE0	DEE0D	Stendal	0	10	0	0	0	100	0	100	0	100	0.25	0	0		0	0	0	0	0	0	0	0	0	0	0	0		0	100	100	100		0	0	0	0
DE	DEE0	DEE0E	Wittenberg	0	10	0	0	0	10.2041	0	100	0	100	0.25	0	0		0	0	0	0	0	0	0	0	0	0	0	0		0	100	100	100		0	0	0	0
DE	DEF0	DEF01	Flensburg, Kreisfreie Stadt	0	10	0	0	0	0	0	0	0	0	0.25	0	0		0	0	0	0	0	0	0	0	0	0	0	0		0	100	100	100		0	0	0	0
DE	DEF0	DEF02	Kiel, Kreisfreie Stadt	0	10	0	0	0	0	0	0	0	0	0.25	0	0		0	0	0	0	0	0	0	0	0	0	0	0		0	100	100	100		0	0	0	0
DE	DEF0	DEF03	Lubeck, Kreisfreie Stadt	0	10	0	0	0	0	0	0	0	0	0.25	0	0		0	0	0	0	0	0	0	0	0	0	0	0		0	100	100	100		0	0	0	0
DE	DEF0	DEF04	Neumunster, Kreisfreie Stadt	0	10	0	0	0	0	0	0	0	0	0.25	0	0		0	0	0	0	0	0	0	0	0	0	0	0		0	100	100	100		0	0	0	0
DE	DEF0	DEF05	Dithmarschen	0	10	0	0	0	0	0	0	0	0	0.25	0	0		0	0	0	0	0	0	0	0	0	0	0	0		0	100	100	100		0	0	0	0
DE	DEF0	DEF06	Herzogtum Lauenburg	0	10	0	0	0	0	0	0	0	0	0.25	0	0		0	0	0	0	0	0	0	0	0	0	0	0		0	100	100	100		0	0	0	0
DE	DEF0	DEF07	Nordfriesland	0	10	0	0	0	0	0	0	0	0	0.25	0	0		0	0	0	0	0	0	0	0	0	0	0	0		0	100	100	100		0	0	0	0
DE	DEF0	DEF08	Ostholstein	0	10	0	0	0	100	0	100	0	100	0.25	0	0		0	0	0	0	0	0	0	0	0	0	0	0		0	100	100	100		0	0	0	0
DE	DEF0	DEF09	Pinneberg	0	10	0	0	0	0	0	0	0	0	0.25	0	0		0	0	0	0	0	0	0	0	0	0	0	0		0	100	100	100		0	0	0	0
DE	DEF0	DEF0A	Plon	0	10	0	0	0	0	0	0	0	0	0.25	0	0		0	0	0	0	0	0	0	0	0	0	0	0		0	100	100	100		0	0	0	0
DE	DEF0	DEF0B	Rendsburg-Eckernforde	0	10	0	0	0	0	0	0	0	0	0.25	0	0		0	0	0	0	0	0	0	0	0	0	0	0		0	100	100	100		0	0	0	0
DE	DEF0	DEF0C	Schleswig-Flensburg	0	10	0	0	0	0	0	0	0	0	0.25	0	0		0	0	0	0	0	0	0	0	0	0	0	0		0	100	100	100		0	0	0	0
DE	DEF0	DEF0D	Segeberg	0	10	0	0	0	0	0	0	0	0	0.25	0	0		0	0	0	0	0	0	0	0	0	0	0	0		0	100	100	100		0	0	0	0
DE	DEF0	DEF0E	Steinburg	0	10	0	0	0	0	0	0	0	0	0.25	0	0		0	0	0	0	0	0	0	0	0	0	0	0		0	100	100	100		0	0	0	0
DE	DEF0	DEF0F	Stormarn	0	10	0	0	0	0	0	0	0	0	0.25	0	0		0	0	0	0	0	0	0	0	0	0	0	0		0	100	100	100		0	0	0	0
DE	DEG0	DEG01	Erfurt, Kreisfreie Stadt	0	10	0	0	0	100	0	100	0	100	0.25	0	0		0	0	0	0	0	0	0	0	0	0	0	0		0	100	100	100		0	0	0	0
DE	DEG0	DEG02	Gera, Kreisfreie Stadt	0	10	0	0	0	100	0	100	0	100	0.25	0	0		0	0	0	0	0	0	0	0	0	0	0	0		0	100	100	100		0	0	0	0
DE	DEG0	DEG03	Jena, Kreisfreie Stadt	0	10	0	0	0	0	0	0	0	0	0.25	0	0		0	0	0	0	0	0	0	0	0	0	0	0		0	100	100	100		0	0	0	0
DE	DEG0	DEG04	Suhl, Kreisfreie Stadt	0	10	0	0	0	0	0	0	0	0	0.25	0	0		0	0	0	0	0	0	0	0	0	0	0	0		0	100	100	100		0	0	0	0
DE	DEG0	DEG05	Weimar, Kreisfreie Stadt	0	10	0	0	0	0	0	0	0	0	0.25	0	0		0	0	0	0	0	0	0	0	0	0	0	0		0	100	100	100		0	0	0	0
DE	DEG0	DEG06	Eichsfeld	0	10	0	0	0	0	0	0	0	0	0.25	0	0		0	0	0	0	0	0	0	0	0	0	0	0		0	100	100	100		0	0	0	0
DE	DEG0	DEG07	Nordhausen	0	10	0	0	0	100	0	100	0	100	0.25	0	0		0	0	0	0	0	0	0	0	0	0	0	0		0	100	100	100		0	0	0	0
DE	DEG0	DEG09	Unstrut-Hainich-Kreis	0	10	0	0	0	100	0	100	0	100	0.25	0	0		0	0	0	0	0	0	0	0	0	0	0	0		0	100	100	100		0	0	0	0
DE	DEG0	DEG0A	Kyffhauserkreis	0	10	0	0	0	100	0	100	0	100	0.25	0	0		0	0	0	0	0	0	0	0	0	0	0	0		0	100	100	100		0	0	0	0
DE	DEG0	DEG0B	Schmalkalden-Meiningen	0	10	0	0	0	0	0	0	0	0	0.25	0	0		0	0	0	0	0	0	0	0	0	0	0	0		0	100	100	100		0	0	0	0
DE	DEG0	DEG0C	Gotha	0	10	0	0	0	25.4826	0	100	0	100	0.25	0	0		0	0	0	0	0	0	0	0	0	0	0	0		0	100	100	100		0	0	0	0
DE	DEG0	DEG0D	Sommerda	0	10	0	0	0	24.2236	0	100	0	100	0.25	0	0		0	0	0	0	0	0	0	0	0	0	0	0		0	100	100	100		0	0	0	0
DE	DEG0	DEG0E	Hildburghausen	0	10	0	0	0	100	0	100	0	100	0.25	0	0		0	0	0	0	0	0	0	0	0	0	0	0		0	100	100	100		0	0	0	0
DE	DEG0	DEG0F	Ilm-Kreis	0	10	0	0	0	0	0	0	0	0	0.25	0	0		0	0	0	0	0	0	0	0	0	0	0	0		0	100	100	100		0	0	0	0
DE	DEG0	DEG0G	Weimarer Land	0	10	0	0	0	100	0	100	0	100	0.25	0	0		0	0	0	0	0	0	0	0	0	0	0	0		0	100	100	100		0	0	0	0
DE	DEG0	DEG0H	Sonneberg	0	10	0	0	0	0	0	0	0	0	0.25	0	0		0	0	0	0	0	0	0	0	0	0	0	0		0	100	100	100		0	0	0	0
DE	DEG0	DEG0I	Saalfeld-Rudolstadt	0	10	0	0	0	0	0	0	0	0	0.25	0	0		0	0	0	0	0	0	0	0	0	0	0	0		0	100	100	100		0	0	0	0
DE	DEG0	DEG0J	Saale-Holzland-Kreis	0	10	0	0	0	100	0	100	0	100	0.25	0	0		0	0	0	0	0	0	0	0	0	0	0	0		0	100	100	100		0	0	0	0
DE	DEG0	DEG0K	Saale-Orla-Kreis	0	10	0	0	0	0	0	0	0	0	0.25	0	0		0	0	0	0	0	0	0	0	0	0	0	0		0	100	100	100		0	0	0	0
DE	DEG0	DEG0L	Greiz	0	10	0	0	0	0	0	0	0	0	0.25	0	0		0	0	0	0	0	0	0	0	0	0	0	0		0	100	100	100		0	0	0	0
DE	DEG0	DEG0M	Altenburger Land	0	10	0	0	0	0	0	0	0	0	0.25	0	0		0	0	0	0	0	0	0	0	0	0	0	0		0	100	100	100		0	0	0	0
DE	DEG0	DEG0N	Eisenach, Kreisfreie Stadt	0	10	0	0	0	0	0	0	0	0	0.25	0	0		0	0	0	0	0	0	0	0	0	0	0	0		0	100	100	100		0	0	0	0
DE	DEG0	DEG0P	Wartburgkreis	0	10	0	0	0	0	0	0	0	0	0.25	0	0		0	0	0	0	0	0	0	0	0	0	0	0		0	100	100	100		0	0	0	0
DK	DK01	DK011	Byen Kobenhavn	0	10	0	0	0	0	0	0	0	0	0.25	0	0		0	0	0	0	0	0	0	0	0	0	0	0		0	100	100	100		0	0	0	0
DK	DK01	DK012	Kobenhavns Omegn	0	10	0	0	0	0	0	0	0	0	0.25	0	0		0	0	0	0	0	0	0	0	0	0	0	0		0	100	100	100		0	0	0	0
DK	DK01	DK013	Nordsjaelland	0	10	0	0	0	100	0	100	0	100	0.25	0	0		0	0	0	0	0	0	0	0	0	0	0	0		0	100	100	100		0	0	0	0
DK	DK01	DK014	Bornholm	0	10	0	0	0	0	0	0	0	0	0.25	0	0		0	0	0	0	0	0	0	0	0	0	0	0		0	100	100	100		0	0	0	0
DK	DK02	DK021	Ostsjaelland	0	10	0	0	0	0	0	0	0	0	0.25	0	0		0	0	0	0	0	0	0	0	0	0	0	0		0	100	100	100		0	0	0	0
DK	DK02	DK022	Vest- og Sydsjaelland	0	10	0	0	0	42	0	100	0	100	0.25	0	0		0	0	0	0	0	0	0	0	0	0	0	0		0	100	100	100		0	0	0	0
DK	DK03	DK031	Fyn	0	10	0	0	0	0	0	0	0	0	0.25	0	0		5.16513	4.64862	4.64862	4.64862	4.64862	4.64862	4.64862	4.637	4.637	4.637	4.637	4.637		4.64862	100	100	100	BioE_COM-S & BioE_COM-M & BioE_COM-L	0	4.64862	0	0
DK	DK03	DK032	Sydjylland	0	10	0	0	0	100	0	100	0	100	0.25	0	0		0	0	0	0	0	0	0	0	0	0	0	0		0	100	100	100		0	0	0	0
DK	DK04	DK041	Vestjylland	0	10	0	0	0	0	0	0	0	0	0.25	0	0		0	0	0	0	0	0	0	0	0	0	0	0		0	100	100	100		0	0	0	0
DK	DK04	DK042	Ostjylland	0	10	0	0	0	100	0	100	0	100	0.25	0	0		0	0	0	0	0	0	0	0	0	0	0	0		0	100	100	100		0	0	0	0
DK	DK05	DK050	Nordjylland	0	10	0	0	0	0	0	0	0	0	0.25	0	0		0	0	0	0	0	0	0	0	0	0	0	0		0	100	100	100		0	0	0	0
EE	EE00	EE001	Pohja-Eesti	0	10	0	0	0	100	0	100	0	100	0	0	0		0	0	0	0	0	0	0	0	0	0	0	0		0	100	100	100		0	0	0	0
EE	EE00	EE004	Laane-Eesti	0	10	0	0	0	100	0	100	0	100	0	0	0		0	0	0	0	0	0	0	0	0	0	0	0		0	100	100	100		0	0	0	0
EE	EE00	EE006	Kesk-Eesti	0	10	0	0	0	100	0	100	0	100	0	0	0		0	0	0	0	0	0	0	0	0	0	0	0		0	100	100	100		0	0	0	0
EE	EE00	EE007	Kirde-Eesti	0	10	0	0	0	0	0	0	0	0	0	0	0		0	0	0	0	0	0	0	0	0	0	0	0		0	100	100	100		0	0	0	0
EE	EE00	EE008	Louna-Eesti	0	10	0	0	0	100	0	100	0	100	0	0	0		0	0	0	0	0	0	0	0	0	0	0	0		0	100	100	100		0	0	0	0
EL	EL30	EL301	Boreios Tomeas Athinon	0	10	0	44.5652	44.5652	0	44.5652	0	44.5652	0	20	0	0		0	0	0	0	0	0	0	0	0	0	0	0		0	0	0	0		0	0	0	0
EL	EL30	EL302	Ditikos Tomeas Athinon	0	10	0	44.5652	44.5652	0	44.5652	0	44.5652	0	20	0	0		0	0	0	0	0	0	0	0	0	0	0	0		0	0	0	0		0	0	0	0
EL	EL30	EL303	Kentrikos Tomeas Athinon	0	10	0	44.5652	44.5652	0	44.5652	0	44.5652	0	20	0	0		0	0	0	0	0	0	0	0	0	0	0	0		0	0	0	0		0	0	0	0
EL	EL30	EL304	Notios Tomeas Athinon	0	10	0	44.5652	44.5652	0	44.5652	0	44.5652	0	20	0	0		0	0	0	0	0	0	0	0	0	0	0	0		0	0	0	0		0	0	0	0
EL	EL30	EL305	Anatoliki Attiki	0	10	0	44.5652	44.5652	0	44.5652	0	44.5652	0	20	0	0		1097.78	988.002	988.002	547.697	547.697	547.697	547.697	790.401	438.157	438.157	438.157	438.157		988.002	0	0	0	BioE_COM-S & BioE_COM-M & BioE_COM-L	0	547.697	440.305	44.5652
EL	EL30	EL306	Ditiki Attiki	0	10	0	44.5652	44.5652	0	44.5652	0	44.5652	0	20	0	0		0	0	0	0	0	0	0	0	0	0	0	0		0	0	0	0		0	0	0	0
EL	EL30	EL307	Peiraias, Nisoi	0	10	0	44.5652	44.5652	0	44.5652	0	44.5652	0	20	0	0		0	0	0	0	0	0	0	0	0	0	0	0		0	0	0	0		0	0	0	0
EL	EL41	EL411	Lesbos, Limnos	0	10	0	9.52381	9.52381	0	9.52381	0	9.52381	0	20	0	0		201.879	181.691	181.691	164.387	164.387	164.387	164.387	145.353	131.51	131.51	131.51	131.51		181.691	0	0	0	BioE_COM-S & BioE_COM-M & BioE_COM-L	0	164.387	17.3039	9.52381
EL	EL41	EL412	Ikaria, Samos	0	10	0	9.52381	9.52381	0	9.52381	0	9.52381	0	20	0	0		106.422	95.7797	95.7797	86.6578	86.6578	86.6578	86.6578	76.6237	69.3262	69.3262	69.3262	69.3262		95.7797	0	0	0	BioE_COM-S & BioE_COM-M & BioE_COM-L	0	86.6578	9.12187	9.52381
EL	EL41	EL413	Xios	0	10	0	9.52381	9.52381	0	9.52381	0	9.52381	0	20	0	0		16.0988	14.4889	14.4889	13.109	13.109	13.109	13.109	11.5911	10.4872	10.4872	10.4872	10.4872		14.4889	0	0	0	BioE_COM-S & BioE_COM-M & BioE_COM-L	0	13.109	1.3799	9.52381
EL	EL42	EL421	Kalimnos, Karpathos, Kos, Rodos	0	10	0	33.3333	33.3333	0	33.3333	0	33.3333	0	20	0	0		16.3585	14.7227	14.7227	9.81512	9.81512	9.81512	9.81512	11.7781	7.85209	7.85209	7.85209	7.85209		14.7227	0	0	0	BioE_COM-S & BioE_COM-M & BioE_COM-L	0	9.81512	4.90756	33.3333
EL	EL42	EL422	Andros, Thira, Kea, Milos, Mikonos, Naxos, Paros, Siros, Tinos	0	10	0	33.3333	33.3333	0	33.3333	0	33.3333	0	20	0	0		21.8114	19.6302	19.6302	13.0868	13.0868	13.0868	13.0868	15.7042	10.4695	10.4695	10.4695	10.4695		19.6302	0	0	0	BioE_COM-S & BioE_COM-M & BioE_COM-L	0	13.0868	6.54341	33.3333
EL	EL43	EL431	Irakleio	0	10	0	10.8696	10.8696	0	10.8696	0	10.8696	0	20	0	0		51.3115	46.1803	46.1803	41.1607	41.1607	41.1607	41.1607	36.9443	32.9286	32.9286	32.9286	32.9286		46.1803	0	0	0	BioE_COM-S & BioE_COM-M & BioE_COM-L	0	41.1607	5.0196	10.8696
EL	EL43	EL432	Lasithi	0	10	0	10.8696	10.8696	0	10.8696	0	10.8696	0	20	0	0		102.623	92.3607	92.3607	82.3215	82.3215	82.3215	82.3215	73.8885	65.8572	65.8572	65.8572	65.8572		92.3607	0	0	0	BioE_COM-S & BioE_COM-M & BioE_COM-L	0	82.3215	10.0392	10.8696
EL	EL43	EL433	Rethimni	0	10	0	10.8696	10.8696	0	10.8696	0	10.8696	0	20	0	0		87.4199	78.678	78.678	70.126	70.126	70.126	70.126	62.9424	56.1008	56.1008	56.1008	56.1008		78.678	0	0	0	BioE_COM-S & BioE_COM-M & BioE_COM-L	0	70.126	8.55195	10.8696
EL	EL43	EL434	Xania	0	10	0	10.8696	10.8696	0	10.8696	0	10.8696	0	20	0	0		428.966	386.069	386.069	344.105	344.105	344.105	344.105	308.856	275.284	275.284	275.284	275.284		386.069	0	0	0	BioE_COM-S & BioE_COM-M & BioE_COM-L	0	344.105	41.9641	10.8696
EL	EL51	EL511	Ebros	0	10	0	10.828	10.828	0	10.828	0	10.828	0	20	0	0		196.057	176.451	176.451	157.345	157.345	157.345	157.345	141.161	125.876	125.876	125.876	125.876		176.451	0	0	0	BioE_COM-S & BioE_COM-M & BioE_COM-L	0	157.345	19.1062	10.828
EL	EL51	EL512	Xanthi	0	10	0	10.828	10.828	0	10.828	0	10.828	0	20	0	0		34.4139	30.9725	30.9725	27.6188	27.6188	27.6188	27.6188	24.778	22.0951	22.0951	22.0951	22.0951		30.9725	0	0	0	BioE_COM-S & BioE_COM-M & BioE_COM-L	0	27.6188	3.35371	10.828
EL	EL51	EL513	Rodopi	0	10	0	10.828	10.828	0	10.828	0	10.828	0	20	0	0		69.1304	62.2174	62.2174	55.4805	55.4805	55.4805	55.4805	49.7739	44.3844	44.3844	44.3844	44.3844		62.2174	0	0	0	BioE_COM-S & BioE_COM-M & BioE_COM-L	0	55.4805	6.73691	10.828
EL	EL51	EL514	Drama	0	10	0	10.828	10.828	0	10.828	0	10.828	0	20	0	0		47.9829	43.1846	43.1846	38.5086	38.5086	38.5086	38.5086	34.5477	30.8069	30.8069	30.8069	30.8069		43.1846	0	0	0	BioE_COM-S & BioE_COM-M & BioE_COM-L	0	38.5086	4.67604	10.828
EL	EL51	EL515	Thasos, Kabala	0	10	0	10.828	10.828	0	10.828	0	10.828	0	20	0	0		993.034	893.731	893.731	796.957	796.957	796.957	796.957	714.984	637.566	637.566	637.566	637.566		893.731	0	0	0	BioE_COM-S & BioE_COM-M & BioE_COM-L	0	796.957	96.7734	10.828
EL	EL52	EL521	Imathia	0	10	0	14.8064	14.8064	0	14.8064	0	14.8064	0	20	0	0		0	0	0	0	0	0	0	0	0	0	0	0		0	0	0	0		0	0	0	0
EL	EL52	EL522	Thessaloniki	0	10	0	14.8064	14.8064	0	14.8064	0	14.8064	0	20	0	0		261.521	235.369	235.369	200.519	200.519	200.519	200.519	188.295	160.415	160.415	160.415	160.415		235.369	0	0	0	BioE_COM-S & BioE_COM-M & BioE_COM-L	0	200.519	34.8496	14.8064
EL	EL52	EL523	Kilkis	0	10	0	14.8064	14.8064	0	14.8064	0	14.8064	0	20	0	0		579.428	521.486	521.486	444.272	444.272	444.272	444.272	417.188	355.418	355.418	355.418	355.418		521.486	0	0	0	BioE_COM-S & BioE_COM-M & BioE_COM-L	0	444.272	77.2131	14.8064
EL	EL52	EL524	Pella	0	10	0	14.8064	14.8064	0	14.8064	0	14.8064	0	20	0	0		629.644	566.679	566.679	482.775	482.775	482.775	482.775	453.344	386.22	386.22	386.22	386.22		566.679	0	0	0	BioE_COM-S & BioE_COM-M & BioE_COM-L	0	482.775	83.9047	14.8064
EL	EL52	EL525	Pieria	0	10	0	14.8064	14.8064	0	14.8064	0	14.8064	0	20	0	0		560.899	504.809	504.809	430.065	430.065	430.065	430.065	403.847	344.052	344.052	344.052	344.052		504.809	0	0	0	BioE_COM-S & BioE_COM-M & BioE_COM-L	0	430.065	74.7439	14.8064
EL	EL52	EL526	Serres	0	10	0	14.8064	14.8064	0	14.8064	0	14.8064	0	20	0	0		1228.48	1105.63	1105.63	941.93	941.93	941.93	941.93	884.508	753.544	753.544	753.544	753.544		1105.63	0	0	0	BioE_COM-S & BioE_COM-M & BioE_COM-L	0	941.93	163.704	14.8064
EL	EL52	EL527	Xalkidiki	0	10	0	14.8064	14.8064	0	14.8064	0	14.8064	0	20	0	0		249.113	224.201	224.201	191.005	191.005	191.005	191.005	179.361	152.804	152.804	152.804	152.804		224.201	0	0	0	BioE_COM-S & BioE_COM-M & BioE_COM-L	0	191.005	33.1961	14.8064
EL	EL53	EL531	Grebena, Kozani	0	10	0	19.774	19.774	0	19.774	0	19.774	0	20	0	0		917.353	825.618	825.618	662.36	662.36	662.36	662.36	660.494	529.888	529.888	529.888	529.888		825.618	0	0	0	BioE_COM-S & BioE_COM-M & BioE_COM-L	0	662.36	163.258	19.774
EL	EL53	EL532	Kastoria	0	10	0	19.774	19.774	0	19.774	0	19.774	0	20	0	0		96.37	86.733	86.733	69.5824	69.5824	69.5824	69.5824	69.3864	55.6659	55.6659	55.6659	55.6659		86.733	0	0	0	BioE_COM-S & BioE_COM-M & BioE_COM-L	0	69.5824	17.1506	19.774
EL	EL53	EL533	Florina	0	10	0	19.774	19.774	0	19.774	0	19.774	0	20	0	0		330.377	297.339	297.339	238.543	238.543	238.543	238.543	237.871	190.835	190.835	190.835	190.835		297.339	0	0	0	BioE_COM-S & BioE_COM-M & BioE_COM-L	0	238.543	58.7959	19.774
EL	EL54	EL541	Arta, Prebeza	0	10	0	46.3636	46.3636	0	46.3636	0	46.3636	0	20	0	0		592.723	533.451	533.451	286.124	286.124	286.124	286.124	426.761	228.899	228.899	228.899	228.899		533.451	0	0	0	BioE_COM-S & BioE_COM-M & BioE_COM-L	0	286.124	247.327	46.3636
EL	EL54	EL542	Thesprotia	0	10	0	46.3636	46.3636	0	46.3636	0	46.3636	0	20	0	0		49.9132	44.9218	44.9218	24.0944	24.0944	24.0944	24.0944	35.9375	19.2756	19.2756	19.2756	19.2756		44.9218	0	0	0	BioE_COM-S & BioE_COM-M & BioE_COM-L	0	24.0944	20.8274	46.3636
EL	EL54	EL543	Ioannina	0	10	0	46.3636	46.3636	0	46.3636	0	46.3636	0	20	0	0		136.108	122.498	122.498	65.7032	65.7032	65.7032	65.7032	97.998	52.5626	52.5626	52.5626	52.5626		122.498	0	0	0	BioE_COM-S & BioE_COM-M & BioE_COM-L	0	65.7032	56.7943	46.3636
EL	EL61	EL611	Karditsa, Trikala	0	10	0	16.6056	16.6056	0	16.6056	0	16.6056	0	20	0	0		416.96	375.264	375.264	312.949	312.949	312.949	312.949	300.211	250.359	250.359	250.359	250.359		375.264	0	0	0	BioE_COM-S & BioE_COM-M & BioE_COM-L	0	312.949	62.3149	16.6056
EL	EL61	EL612	Larisa	0	10	0	16.6056	16.6056	0	16.6056	0	16.6056	0	20	0	0		3828.85	3445.97	3445.97	2873.74	2873.74	2873.74	2873.74	2756.77	2298.99	2298.99	2298.99	2298.99		3445.97	0	0	0	BioE_COM-S & BioE_COM-M & BioE_COM-L	0	2873.74	572.224	16.6056
EL	EL61	EL613	Magnisia	0	10	0	16.6056	16.6056	0	16.6056	0	16.6056	0	20	0	0		1799.42	1619.48	1619.48	1350.55	1350.55	1350.55	1350.55	1295.58	1080.44	1080.44	1080.44	1080.44		1619.48	0	0	0	BioE_COM-S & BioE_COM-M & BioE_COM-L	0	1350.55	268.924	16.6056
EL	EL62	EL621	Zakinthos	0	10	0	37.5	37.5	0	37.5	0	37.5	0	20	0	0		5.24727	4.72254	4.72254	2.95159	2.95159	2.95159	2.95159	3.77803	2.36127	2.36127	2.36127	2.36127		4.72254	0	0	0	BioE_COM-S & BioE_COM-M & BioE_COM-L	0	2.95159	1.77095	37.5
EL	EL62	EL622	Kerkira	0	10	0	37.5	37.5	0	37.5	0	37.5	0	20	0	0		20.0629	18.0566	18.0566	11.2854	11.2854	11.2854	11.2854	14.4453	9.02829	9.02829	9.02829	9.02829		18.0566	0	0	0	BioE_COM-S & BioE_COM-M & BioE_COM-L	0	11.2854	6.77122	37.5
EL	EL62	EL623	Ithaki, Kefallinia	0	10	0	37.5	37.5	0	37.5	0	37.5	0	20	0	0		16.2106	14.5895	14.5895	9.11845	9.11845	9.11845	9.11845	11.6716	7.29476	7.29476	7.29476	7.29476		14.5895	0	0	0	BioE_COM-S & BioE_COM-M & BioE_COM-L	0	9.11845	5.47107	37.5
EL	EL62	EL624	Leikada	0	10	0	37.5	37.5	0	37.5	0	37.5	0	20	0	0		6.08567	5.47711	5.47711	3.42319	3.42319	3.42319	3.42319	4.38168	2.73855	2.73855	2.73855	2.73855		5.47711	0	0	0	BioE_COM-S & BioE_COM-M & BioE_COM-L	0	3.42319	2.05391	37.5
EL	EL63	EL631	Aitoloakarnania	0	10	0	28.9855	28.9855	0	28.9855	0	28.9855	0	20	0	0		607.827	547.044	547.044	388.481	388.481	388.481	388.481	437.635	310.785	310.785	310.785	310.785		547.044	0	0	0	BioE_COM-S & BioE_COM-M & BioE_COM-L	0	388.481	158.564	28.9855
EL	EL63	EL632	AxaIa	0	10	0	28.9855	28.9855	0	28.9855	0	28.9855	0	20	0	0		590.29	531.261	531.261	377.272	377.272	377.272	377.272	425.009	301.818	301.818	301.818	301.818		531.261	0	0	0	BioE_COM-S & BioE_COM-M & BioE_COM-L	0	377.272	153.989	28.9855
EL	EL63	EL633	Ileia	0	10	0	28.9855	28.9855	0	28.9855	0	28.9855	0	20	0	0		194.522	175.069	175.069	124.325	124.325	124.325	124.325	140.056	99.4597	99.4597	99.4597	99.4597		175.069	0	0	0	BioE_COM-S & BioE_COM-M & BioE_COM-L	0	124.325	50.7448	28.9855
EL	EL64	EL641	Boiotia	0	10	0	30.411	30.411	0	30.411	0	30.411	0	20	0	0		203.561	183.205	183.205	127.49	127.49	127.49	127.49	146.564	101.992	101.992	101.992	101.992		183.205	0	0	0	BioE_COM-S & BioE_COM-M & BioE_COM-L	0	127.49	55.7143	30.411
EL	EL64	EL642	Eiboia	0	10	0	30.411	30.411	0	30.411	0	30.411	0	20	0	0		559.539	503.585	503.585	350.44	350.44	350.44	350.44	402.868	280.352	280.352	280.352	280.352		503.585	0	0	0	BioE_COM-S & BioE_COM-M & BioE_COM-L	0	350.44	153.145	30.411
EL	EL64	EL643	Eiritania	0	10	0	30.411	30.411	0	30.411	0	30.411	0	20	0	0		222.179	199.961	199.961	139.151	139.151	139.151	139.151	159.969	111.321	111.321	111.321	111.321		199.961	0	0	0	BioE_COM-S & BioE_COM-M & BioE_COM-L	0	139.151	60.81	30.411
EL	EL64	EL644	Fthiotida	0	10	0	30.411	30.411	0	30.411	0	30.411	0	20	0	0		1123.96	1011.57	1011.57	703.94	703.94	703.94	703.94	809.254	563.152	563.152	563.152	563.152		1011.57	0	0	0	BioE_COM-S & BioE_COM-M & BioE_COM-L	0	703.94	307.627	30.411
EL	EL64	EL645	Fokida	0	10	0	30.411	30.411	0	30.411	0	30.411	0	20	0	0		228.715	205.843	205.843	143.244	143.244	143.244	143.244	164.675	114.596	114.596	114.596	114.596		205.843	0	0	0	BioE_COM-S & BioE_COM-M & BioE_COM-L	0	143.244	62.599	30.411
EL	EL65	EL651	Argolida, Arkadia	0	10	0	14.5455	14.5455	0	14.5455	0	14.5455	0	20	0	0		2394.63	2155.16	2155.16	1841.69	1841.69	1841.69	1841.69	1724.13	1473.35	1473.35	1473.35	1473.35		2155.16	0	0	0	BioE_COM-S & BioE_COM-M & BioE_COM-L	0	1841.69	313.478	14.5455
EL	EL65	EL652	Korinthia	0	10	0	14.5455	14.5455	0	14.5455	0	14.5455	0	20	0	0		384.374	345.937	345.937	295.619	295.619	295.619	295.619	276.749	236.495	236.495	236.495	236.495		345.937	0	0	0	BioE_COM-S & BioE_COM-M & BioE_COM-L	0	295.619	50.3181	14.5455
EL	EL65	EL653	Lakonia, Messinia	0	10	0	14.5455	14.5455	0	14.5455	0	14.5455	0	20	0	0		761.977	685.78	685.78	586.03	586.03	586.03	586.03	548.624	468.824	468.824	468.824	468.824		685.78	0	0	0	BioE_COM-S & BioE_COM-M & BioE_COM-L	0	586.03	99.7498	14.5455
ES	ES11	ES111	A Coruna	0	10	0	10.8108	10.8108	0	10.8108	0	10.8108	0	0	0	0		181.992	163.793	163.793	146.085	146.085	146.085	146.085	163.793	146.085	146.085	146.085	146.085		163.793	0	0	0	BioE_COM-S & BioE_COM-M & BioE_COM-L	0	146.085	17.7073	10.8108
ES	ES11	ES112	Lugo	0	10	0	10.8108	10.8108	44.8454	10.8108	100	10.8108	100	0	0	0		988.466	889.619	889.619	793.444	437.621	0	0	889.619	793.444	437.621	0	0		889.619	44.8454	100	100	BioE_COM-S	44.8454	437.621	451.998	50.808
ES	ES11	ES113	Ourense	1.89573	10	0	10.8108	10.8108	15.5213	10.8108	24.0521	10.8108	100	0	0	0		1295.04	1143.44	1143.44	1019.82	861.532	774.533	0	1143.44	1019.82	861.532	774.533	0		1143.44	15.5213	24.0521	100	BioE_COM-S	15.5213	861.532	281.905	24.6542
ES	ES11	ES114	Pontevedra	0	10	0	10.8108	10.8108	90.2174	10.8108	100	10.8108	96.7391	0	0	0		128.146	115.331	115.331	102.863	10.0627	0	3.35423	115.331	102.863	10.0627	0	3.35423		115.331	90.2174	100	96.7391	BioE_COM-S	90.2174	10.0627	105.268	91.275
ES	ES12	ES120	Asturias	0	10	0	7.84314	7.84314	56.25	7.84314	100	7.84314	100	0	0	0		336.664	302.998	302.998	279.233	122.164	0	0	302.998	279.233	122.164	0	0		302.998	56.25	100	100	BioE_COM-S	56.25	122.164	180.833	59.6814
ES	ES13	ES130	Cantabria	0	10	0	0	0	0	0	0	0	0	0	0	0		41.2822	37.1539	37.1539	37.1539	37.1539	37.1539	37.1539	37.1539	37.1539	37.1539	37.1539	37.1539		37.1539	100	100	100	BioE_COM-S & BioE_COM-M & BioE_COM-L	0	37.1539	0	0
ES	ES21	ES211	Araba/Alava	0	10	0	22.5806	22.5806	0.247001	22.5806	0	22.5806	0	0	0	0		30.4733	27.426	27.426	21.233	21.1806	21.233	21.233	27.426	21.233	21.1806	21.233	21.233		27.426	0.247001	0	0	BioE_COM-M & BioE_COM-L	0	21.233	6.19296	22.5806
ES	ES21	ES212	Gipuzkoa	0	10	0	22.5806	22.5806	0	22.5806	0	22.5806	0	0	0	0		93.9351	84.5416	84.5416	65.4516	65.4516	65.4516	65.4516	84.5416	65.4516	65.4516	65.4516	65.4516		84.5416	0	0	0	BioE_COM-S & BioE_COM-M & BioE_COM-L	0	65.4516	19.09	22.5806
ES	ES21	ES213	Bizkaia	0	10	0	22.5806	22.5806	0	22.5806	0	22.5806	0	0	0	0		105.968	95.3712	95.3712	73.8357	73.8357	73.8357	73.8357	95.3712	73.8357	73.8357	73.8357	73.8357		95.3712	0	0	0	BioE_COM-S & BioE_COM-M & BioE_COM-L	0	73.8357	21.5354	22.5806
ES	ES22	ES220	Navarra	0.0254453	10	0	8	8	20.9924	8	45.1908	8	37.659	0	0	0		2022.33	1819.63	1819.63	1674.06	1322.64	917.539	1043.63	1819.63	1674.06	1322.64	917.539	1043.63		1819.63	20.9924	45.1908	37.659	BioE_COM-S	20.9924	1322.64	496.996	27.313
ES	ES23	ES230	La Rioja	0.00898715	10	0	6.08828	6.08828	4.09814	6.08828	10.1735	6.08828	3.92738	0	0	0		4751.92	4276.34	4276.34	4015.99	3851.41	3607.42	3858.26	4276.34	4015.99	3851.41	3607.42	3858.26		4276.34	4.09814	10.1735	3.92738	BioE_COM-L	3.92738	3858.26	418.079	9.77655
ES	ES24	ES241	Huesca	0	10	0	2.2682	2.2682	15.2223	2.2682	34.8621	2.2682	43.1626	0	0	0		8189.53	7370.58	7370.58	7203.4	6106.88	4692.14	4094.22	7370.58	7203.4	6106.88	4692.14	4094.22		7370.58	15.2223	34.8621	43.1626	BioE_COM-S	15.2223	6106.88	1263.7	17.1452
ES	ES24	ES242	Teruel	0	10	0	2.2682	2.2682	13.9722	2.2682	36.5764	2.2682	50.7681	0	0	0		11678.8	10510.9	10510.9	10272.5	8837.2	6515.18	5057.35	10510.9	10272.5	8837.2	6515.18	5057.35		10510.9	13.9722	36.5764	50.7681	BioE_COM-S	13.9722	8837.2	1673.7	15.9235
ES	ES24	ES243	Zaragoza	0.0152138	10	0	2.2682	2.2682	12.2851	2.2682	25.7112	2.2682	22.2501	0	0	0		22320.4	20085.3	20085.3	19629.7	17218.2	14582.7	15262.1	20085.3	19629.7	17218.2	14582.7	15262.1		20085.3	12.2851	25.7112	22.2501	BioE_COM-S	12.2851	17218.2	2867.1	14.2747
ES	ES30	ES300	Madrid	0	10	0	2.32558	2.32558	46.3636	2.32558	59.8701	2.32558	40.4416	0	0	0		227.658	204.892	204.892	200.127	107.341	80.3107	119.192	204.892	200.127	107.341	80.3107	119.192		204.892	46.3636	59.8701	40.4416	BioE_COM-L	40.4416	119.192	85.6994	41.8266
ES	ES41	ES411	Avila	1.01256	10	0	8.70787	8.70787	62.9405	8.70787	100	8.70787	100	0	0	0		299.118	266.481	266.481	243.276	90.1569	0	0	266.481	243.276	90.1569	0	0		266.481	62.9405	100	100	BioE_COM-S	62.9405	90.1569	176.324	66.1676
ES	ES41	ES412	Burgos	0.400641	10	0	8.70787	8.70787	32.2115	8.70787	82.1314	8.70787	99.7997	0	0	0		180.321	161.638	161.638	147.563	100.031	26.3675	0.295599	161.638	147.563	100.031	26.3675	0.295599		161.638	32.2115	82.1314	99.7997	BioE_COM-S	32.2115	100.031	61.6076	38.1145
ES	ES41	ES413	Leon	0	10	0	8.70787	8.70787	26.8067	8.70787	50.5559	8.70787	62.9092	0	0	0		348.774	313.897	313.897	286.563	209.745	141.688	106.288	313.897	286.563	209.745	141.688	106.288		313.897	26.8067	50.5559	62.9092	BioE_COM-S	26.8067	209.745	104.152	33.1802
ES	ES41	ES414	Palencia	0	10	0	8.70787	8.70787	100	8.70787	100	8.70787	100	0	0	0		79.2565	71.3308	71.3308	65.1194	0	0	0	71.3308	65.1194	0	0	0		71.3308	100	100	100		100	0	71.3308	100
ES	ES41	ES415	Salamanca	0	10	0	8.70787	8.70787	67.1725	8.70787	75.0799	8.70787	63.4185	0	0	0		538.788	484.909	484.909	442.684	145.322	110.317	161.94	484.909	442.684	145.322	110.317	161.94		484.909	67.1725	75.0799	63.4185	BioE_COM-L	63.4185	161.94	322.969	66.604
ES	ES41	ES416	Segovia	0	10	0	8.70787	8.70787	100	8.70787	100	8.70787	100	0	0	0		62.3102	56.0791	56.0791	51.1958	0	0	0	56.0791	51.1958	0	0	0		56.0791	100	100	100		100	0	56.0791	100
ES	ES41	ES417	Soria	0	10	0	8.70787	8.70787	100	8.70787	100	8.70787	100	0	0	0		220.556	198.5	198.5	181.215	0	0	0	198.5	181.215	0	0	0		198.5	100	100	100		100	0	198.5	100
ES	ES41	ES418	Valladolid	0	10	0	8.70787	8.70787	40.9799	8.70787	63.3878	8.70787	100	0	0	0		231.272	208.145	208.145	190.02	112.15	69.5704	0	208.145	190.02	112.15	69.5704	0		208.145	40.9799	63.3878	100	BioE_COM-S	40.9799	112.15	95.9947	46.1193
ES	ES41	ES419	Zamora	0	10	0	8.70787	8.70787	55.1087	8.70787	78.6896	8.70787	92.9938	0	0	0		231.372	208.235	208.235	190.102	85.3394	40.5116	13.3189	208.235	190.102	85.3394	40.5116	13.3189		208.235	55.1087	78.6896	92.9938	BioE_COM-S	55.1087	85.3394	122.896	59.0177
ES	ES42	ES421	Albacete	0.121936	10	0	2.30179	2.30179	41.623	2.30179	71.1255	2.30179	57.8344	0	0	0		18672.2	16784.5	16784.5	16398.2	9572.76	4734.89	6914.38	16784.5	16398.2	9572.76	4734.89	6914.38		16784.5	41.623	71.1255	57.8344	BioE_COM-S	41.623	9572.76	7211.74	42.9667
ES	ES42	ES422	Ciudad Real	0.0189915	10	0	2.30179	2.30179	15.7582	2.30179	34.878	2.30179	14.1819	0	0	0		2586.77	2327.65	2327.65	2274.07	1915.72	1480.92	1951.56	2327.65	2274.07	1915.72	1480.92	1951.56		2327.65	15.7582	34.878	14.1819	BioE_COM-L	14.1819	1951.56	376.085	16.1573
ES	ES42	ES423	Cuenca	0	10	0	2.30179	2.30179	34.1647	2.30179	63.6191	2.30179	53.6431	0	0	0		6562.84	5906.55	5906.55	5770.6	3799.09	2099.39	2675.07	5906.55	5770.6	3799.09	2099.39	2675.07		5906.55	34.1647	63.6191	53.6431	BioE_COM-S	34.1647	3799.09	2107.46	35.6801
ES	ES42	ES424	Guadalajara	0	10	0	2.30179	2.30179	15.3309	2.30179	34.3479	2.30179	27.255	0	0	0		263.761	237.385	237.385	231.921	196.365	152.261	168.711	237.385	231.921	196.365	152.261	168.711		237.385	15.3309	34.3479	27.255	BioE_COM-S	15.3309	196.365	41.0197	17.2798
ES	ES42	ES425	Toledo	0.0194146	10	0	2.30179	2.30179	12.0783	2.30179	18.8613	2.30179	9.67092	0	0	0		4713.65	4241.46	4241.46	4143.83	3643.32	3362.25	3743.08	4241.46	4143.83	3643.32	3362.25	3743.08		4241.46	12.0783	18.8613	9.67092	BioE_COM-L	9.67092	3743.08	498.376	11.7501
ES	ES43	ES431	Badajoz	0	10	0	2.15655	2.15655	7.81916	2.15655	19.6027	2.15655	12.4163	0	0	0		2682.2	2413.98	2413.98	2361.92	2177.24	1898.92	2068.66	2413.98	2361.92	2177.24	1898.92	2068.66		2413.98	7.81916	19.6027	12.4163	BioE_COM-S	7.81916	2177.24	236.741	9.80708
ES	ES43	ES432	Caceres	2.7027	10	0	2.15655	2.15655	19.0426	2.15655	41.362	2.15655	30.0035	0	0	0		4744.18	4154.37	4154.37	4064.77	3290.74	2383.5	2845.2	4154.37	4064.77	3290.74	2383.5	2845.2		4154.37	19.0426	41.362	30.0035	BioE_COM-S	19.0426	3290.74	863.629	20.7885
ES	ES51	ES511	Barcelona	0	10	0	3.48641	3.48641	8.87207	3.48641	12.6117	3.48641	7.34292	0	0	0		988.558	889.702	889.702	858.683	782.5	750.389	795.631	889.702	858.683	782.5	750.389	795.631		889.702	8.87207	12.6117	7.34292	BioE_COM-L	7.34292	795.631	94.0711	10.5733
ES	ES51	ES512	Girona	0	10	0	3.48641	3.48641	33.5089	3.48641	72.3502	3.48641	97.3667	0	0	0		918.619	826.757	826.757	797.933	530.555	220.627	21.0121	826.757	797.933	530.555	220.627	21.0121		826.757	33.5089	72.3502	97.3667	BioE_COM-S	33.5089	530.555	296.203	35.827
ES	ES51	ES513	Lleida	0.0495172	10	0	3.48641	3.48641	5.26533	3.48641	11.3064	3.48641	5.14979	0	0	0		11897.9	10702.8	10702.8	10329.6	9785.74	9161.72	9797.67	10702.8	10329.6	9785.74	9161.72	9797.67		10702.8	5.26533	11.3064	5.14979	BioE_COM-L	5.14979	9797.67	905.097	8.45666
ES	ES51	ES514	Tarragona	0.527218	10	0	3.48641	3.48641	2.21102	3.48641	4.3825	3.48641	0.0197707	0	0	0		19859.7	17779.5	17779.5	17159.6	16780.2	16407.6	17156.2	17779.5	17159.6	16780.2	16407.6	17156.2		17779.5	2.21102	4.3825	0.0197707	BioE_COM-L	0.0197707	17156.2	623.259	3.50549
ES	ES52	ES521	Alicante / Alacant	0.331332	10	0	4.9819	4.9819	48.8631	4.9819	58.5753	4.9819	40.5591	0	0	0		14446.1	12958.4	12958.4	12312.8	6296.38	5100.55	7318.84	12958.4	12312.8	6296.38	5100.55	7318.84		12958.4	48.8631	58.5753	40.5591	BioE_COM-L	40.5591	7318.84	5639.54	43.5204
ES	ES52	ES522	Castellon / Castello	0.0701684	10	0	4.9819	4.9819	50.4511	4.9819	69.6171	4.9819	66.675	0	0	0		16225	14592.2	14592.2	13865.2	6870.08	4212.67	4620.59	14592.2	13865.2	6870.08	4212.67	4620.59		14592.2	50.4511	69.6171	66.675	BioE_COM-S	50.4511	6870.08	7722.13	52.9196
ES	ES52	ES523	Valencia / Valencia	0.0914262	10	0	4.9819	4.9819	55.3815	4.9819	75.4876	4.9819	64.8466	0	0	0		15872.6	14272.3	14272.3	13561.3	6050.85	3324.2	4767.25	14272.3	13561.3	6050.85	3324.2	4767.25		14272.3	55.3815	75.4876	64.8466	BioE_COM-S	55.3815	6050.85	8221.47	57.6043
ES	ES53	ES531	Eivissa Y Formentera	0.21966	10	0	3.91782	3.91782	51.8671	3.91782	92.8336	3.91782	100	0	0	0		573.758	515.248	515.248	495.062	238.288	35.4781	0	515.248	495.062	238.288	35.4781	0		515.248	51.8671	92.8336	100	BioE_COM-S	51.8671	238.288	276.961	53.7529
ES	ES53	ES532	Mallorca	0.911334	10	0	3.91782	3.91782	5.5277	3.91782	9.31232	3.91782	4.57657	0	0	0		12046.3	10742.8	10742.8	10321.9	9751.37	9360.73	9849.55	10742.8	10321.9	9751.37	9360.73	9849.55		10742.8	5.5277	9.31232	4.57657	BioE_COM-L	4.57657	9849.55	893.275	8.31509
ES	ES53	ES533	Menorca	0	10	0	3.91782	3.91782	100	3.91782	100	3.91782	100	0	0	0		5.76517	5.18865	5.18865	4.98537	0	0	0	5.18865	4.98537	0	0	0		5.18865	100	100	100		100	0	5.18865	100
ES	ES61	ES611	Almeria	1.15539	10	0	2.07246	2.07246	74.6286	2.07246	100	2.07246	100	0	0	0		26306.8	23402.5	23402.5	22917.5	5814.49	0	0	23402.5	22917.5	5814.49	0	0		23402.5	74.6286	100	100	BioE_COM-S	74.6286	5814.49	17588	75.1544
ES	ES61	ES612	Cadiz	0.553295	10	0	2.07246	2.07246	26.2327	2.07246	46.2978	2.07246	35.9479	0	0	0		418.397	374.474	374.474	366.713	270.514	196.933	234.887	374.474	366.713	270.514	196.933	234.887		374.474	26.2327	46.2978	35.9479	BioE_COM-S	26.2327	270.514	103.96	27.7615
ES	ES61	ES613	Cordoba	0.39733	10	0	2.07246	2.07246	3.3202	2.07246	5.95995	2.07246	2.45315	0	0	0		859.232	770.236	770.236	754.274	729.23	709.319	735.77	770.236	754.274	729.23	709.319	735.77		770.236	3.3202	5.95995	2.45315	BioE_COM-L	2.45315	735.77	34.4663	4.47477
ES	ES61	ES614	Granada	1.54167	10	0	2.07246	2.07246	14.3636	2.07246	24.8337	2.07246	21.0212	0	0	0		39153.9	34695.2	34695.2	33976.2	29096	25538.7	26834	34695.2	33976.2	29096	25538.7	26834		34695.2	14.3636	24.8337	21.0212	BioE_COM-S	14.3636	29096	5599.24	16.1383
ES	ES61	ES615	Huelva	0.0205952	10	0	2.07246	2.07246	42.5085	2.07246	75.5535	2.07246	68.2834	0	0	0		3615.92	3253.66	3253.66	3186.23	1831.81	778.921	1010.56	3253.66	3186.23	1831.81	778.921	1010.56		3253.66	42.5085	75.5535	68.2834	BioE_COM-S	42.5085	1831.81	1421.85	43.7
ES	ES61	ES616	Jaen	0.821696	10	0	2.07246	2.07246	0.347171	2.07246	0.256453	2.07246	0.0863565	0	0	0		1591.43	1420.52	1420.52	1391.08	1386.25	1387.51	1389.88	1420.52	1391.08	1386.25	1387.51	1389.88		1420.52	0.347171	0.256453	0.0863565	BioE_COM-L	0.0863565	1389.88	30.641	2.15702
ES	ES61	ES617	Malaga	0.536319	10	0	2.07246	2.07246	15.7038	2.07246	25.668	2.07246	11.7237	0	0	0		9287.23	8313.68	8313.68	8141.38	6862.87	6051.65	7186.91	8313.68	8141.38	6862.87	6051.65	7186.91		8313.68	15.7038	25.668	11.7237	BioE_COM-L	11.7237	7186.91	1126.77	13.5532
ES	ES61	ES618	Sevilla	0.0738105	10	0	2.07246	2.07246	10.9978	2.07246	16.5889	2.07246	3.6378	0	0	0		933.129	839.196	839.196	821.804	731.424	685.476	791.909	839.196	821.804	731.424	685.476	791.909		839.196	10.9978	16.5889	3.6378	BioE_COM-L	3.6378	791.909	47.2876	5.63487
ES	ES62	ES620	Murcia	0.0569653	10	0	1.73778	1.73778	33.8607	1.73778	71.5873	1.73778	37.4987	0	0	0		51998.5	46772	46772	45959.2	30397.1	13058.3	28725.1	46772	45959.2	30397.1	13058.3	28725.1		46772	33.8607	71.5873	37.4987	BioE_COM-S	33.8607	30397.1	16374.9	35.01
ES	ES63	ES630	Ceuta	0.0569653	10	0	0	0	0	0	0	0	0	0	0	0		0	0	0	0	0	0	0	0	0	0	0	0		0	100	100	100		0	0	0	0
ES	ES64	ES640	Melilla	0.0569653	10	0	0	0	0	0	0	0	0	0	0	0		0	0	0	0	0	0	0	0	0	0	0	0		0	100	100	100		0	0	0	0
ES	ES70	ES703	El Hierro	36.036	10	0	14.8148	14.8148	100	14.8148	100	14.8148	100	0	0	0		7.9863	4.59752	4.59752	3.9164	0	0	0	4.59752	3.9164	0	0	0		4.59752	100	100	100		100	0	4.59752	100
ES	ES70	ES704	Fuerteventura	36.036	10	0	14.8148	14.8148	0	14.8148	0	14.8148	0	0	0	0		0	0	0	0	0	0	0	0	0	0	0	0		0	0	0	0		0	0	0	0
ES	ES70	ES705	Gran Canaria	2.68336	10	0	14.8148	14.8148	49.9106	14.8148	100	14.8148	100	0	0	0		103.593	90.7316	90.7316	77.2899	38.7141	0	0	90.7316	77.2899	38.7141	0	0		90.7316	49.9106	100	100	BioE_COM-S	49.9106	38.7141	52.0175	57.3312
ES	ES70	ES706	La Gomera	20.1923	10	0	14.8148	14.8148	100	14.8148	100	14.8148	100	0	0	0		0	0	0	0	0	0	0	0	0	0	0	0		0	100	100	100		0	0	0	0
ES	ES70	ES707	La Palma	28.7397	10	0	14.8148	14.8148	14.7821	14.8148	51.8846	14.8148	75.6773	0	0	0		63.3882	40.6535	40.6535	34.6308	29.5116	16.6628	8.42315	40.6535	34.6308	29.5116	16.6628	8.42315		40.6535	14.7821	51.8846	75.6773	BioE_COM-S	14.7821	29.5116	11.1419	27.407
ES	ES70	ES708	Lanzarote	0	10	0	14.8148	14.8148	100	14.8148	100	14.8148	100	0	0	0		0	0	0	0	0	0	0	0	0	0	0	0		0	100	100	100		0	0	0	0
ES	ES70	ES709	Tenerife	15.8234	10	0	14.8148	14.8148	33.9926	14.8148	100	14.8148	100	0	0	0		22.8547	17.3145	17.3145	14.7494	9.73567	0	0	17.3145	14.7494	9.73567	0	0		17.3145	33.9926	100	100	BioE_COM-S	33.9926	9.73567	7.57881	43.7715
FI	FI19	FI193	Keski-Suomi	15.8234	10	0	0	0	0	0	0	0	0	0	0	0		0	0	0	0	0	0	0	0	0	0	0	0		0	100	100	100		0	0	0	0
FI	FI19	FI194	Etela-Pohjanmaa	15.8234	10	0	0	0	0	0	0	0	0	0	0	0		0	0	0	0	0	0	0	0	0	0	0	0		0	100	100	100		0	0	0	0
FI	FI19	FI195	Pohjanmaa	15.8234	10	0	0	0	0	0	0	0	0	0	0	0		0	0	0	0	0	0	0	0	0	0	0	0		0	100	100	100		0	0	0	0
FI	FI19	FI196	Satakunta	15.8234	10	0	0	0	0	0	0	0	0	0	0	0		0	0	0	0	0	0	0	0	0	0	0	0		0	100	100	100		0	0	0	0
FI	FI19	FI197	Pirkanmaa	15.8234	10	0	0	0	0	0	0	0	0	0	0	0		0	0	0	0	0	0	0	0	0	0	0	0		0	100	100	100		0	0	0	0
FI	FI1B	FI1B1	Helsinki-Uusimaa	15.8234	10	0	0	0	0	0	0	0	0	0	0	0		0	0	0	0	0	0	0	0	0	0	0	0		0	100	100	100		0	0	0	0
FI	FI1C	FI1C1	Varsinais-Suomi	15.8234	10	0	0	0	0	0	0	0	0	0	0	0		0	0	0	0	0	0	0	0	0	0	0	0		0	100	100	100		0	0	0	0
FI	FI1C	FI1C2	Kanta-Hame	15.8234	10	0	0	0	0	0	0	0	0	0	0	0		0	0	0	0	0	0	0	0	0	0	0	0		0	100	100	100		0	0	0	0
FI	FI1C	FI1C3	Paijat-Hame	15.8234	10	0	0	0	0	0	0	0	0	0	0	0		0	0	0	0	0	0	0	0	0	0	0	0		0	100	100	100		0	0	0	0
FI	FI1C	FI1C4	Kymenlaakso	15.8234	10	0	0	0	0	0	0	0	0	0	0	0		0	0	0	0	0	0	0	0	0	0	0	0		0	100	100	100		0	0	0	0
FI	FI1C	FI1C5	Etela-Karjala	15.8234	10	0	0	0	0	0	0	0	0	0	0	0		0	0	0	0	0	0	0	0	0	0	0	0		0	100	100	100		0	0	0	0
FI	FI1D	FI1D1	Etela-Savo	15.8234	10	0	0	0	0	0	0	0	0	0	0	0		0	0	0	0	0	0	0	0	0	0	0	0		0	100	100	100		0	0	0	0
FI	FI1D	FI1D2	Pohjois-Savo	15.8234	10	0	0	0	0	0	0	0	0	0	0	0		0	0	0	0	0	0	0	0	0	0	0	0		0	100	100	100		0	0	0	0
FI	FI1D	FI1D3	Pohjois-Karjala	15.8234	10	0	0	0	0	0	0	0	0	0	0	0		0	0	0	0	0	0	0	0	0	0	0	0		0	100	100	100		0	0	0	0
FI	FI1D	FI1D4	Kainuu	15.8234	10	0	0	0	0	0	0	0	0	0	0	0		0	0	0	0	0	0	0	0	0	0	0	0		0	100	100	100		0	0	0	0
FI	FI1D	FI1D5	Keski-Pohjanmaa	15.8234	10	0	0	0	0	0	0	0	0	0	0	0		0	0	0	0	0	0	0	0	0	0	0	0		0	100	100	100		0	0	0	0
FI	FI1D	FI1D6	Pohjois-Pohjanmaa	15.8234	10	0	0	0	0	0	0	0	0	0	0	0		0	0	0	0	0	0	0	0	0	0	0	0		0	100	100	100		0	0	0	0
FI	FI1D	FI1D7	Lappi	15.8234	10	0	0	0	0	0	0	0	0	0	0	0		0	0	0	0	0	0	0	0	0	0	0	0		0	100	100	100		0	0	0	0
FI	FI20	FI200	Aland	15.8234	10	0	0	0	0	0	0	0	0	0	0	0		0	0	0	0	0	0	0	0	0	0	0	0		0	100	100	100		0	0	0	0
FR	FR10	FR101	Paris	15.8234	10	0	0	0	0	0	0	0	0	0.5	0	0		0	0	0	0	0	0	0	0	0	0	0	0		0	100	100	100		0	0	0	0
FR	FR10	FR102	Seine-et-Marne	0	10	0	0	0	100	0	100	0	100	0.5	0	0		0	0	0	0	0	0	0	0	0	0	0	0		0	100	100	100		0	0	0	0
FR	FR10	FR103	Yvelines	0	10	0	0	0	100	0	100	0	100	0.5	0	0		0	0	0	0	0	0	0	0	0	0	0	0		0	100	100	100		0	0	0	0
FR	FR10	FR104	Essonne	0	10	0	0	0	100	0	100	0	100	0.5	0	0		0	0	0	0	0	0	0	0	0	0	0	0		0	100	100	100		0	0	0	0
FR	FR10	FR105	Hauts-de-Seine	0	10	0	0	0	0	0	0	0	0	0.5	0	0		0	0	0	0	0	0	0	0	0	0	0	0		0	100	100	100		0	0	0	0
FR	FR10	FR106	Seine-Saint-Denis	0	10	0	0	0	0	0	0	0	0	0.5	0	0		0	0	0	0	0	0	0	0	0	0	0	0		0	100	100	100		0	0	0	0
FR	FR10	FR107	Val-de-Marne	0	10	0	0	0	100	0	100	0	100	0.5	0	0		0	0	0	0	0	0	0	0	0	0	0	0		0	100	100	100		0	0	0	0
FR	FR10	FR108	Val-d'Oise	0	10	0	0	0	100	0	100	0	100	0.5	0	0		0	0	0	0	0	0	0	0	0	0	0	0		0	100	100	100		0	0	0	0
FR	FR21	FR211	Ardennes	0	10	0	0	0	100	0	100	0	100	0.5	0	0		0	0	0	0	0	0	0	0	0	0	0	0		0	100	100	100		0	0	0	0
FR	FR21	FR212	Aube	0	10	0	0	0	27.4536	0	62.8647	0	100	0.5	0	0		0	0	0	0	0	0	0	0	0	0	0	0		0	100	100	100		0	0	0	0
FR	FR21	FR213	Marne	0	10	0	0	0	24.8766	0	45.5644	0	38.975	0.5	0	0		0	0	0	0	0	0	0	0	0	0	0	0		0	100	100	100		0	0	0	0
FR	FR21	FR214	Haute-Marne	0	10	0	0	0	100	0	100	0	100	0.5	0	0		0	0	0	0	0	0	0	0	0	0	0	0		0	100	100	100		0	0	0	0
FR	FR22	FR221	Aisne	0	10	0	0	0	65.8537	0	100	0	100	0.5	0	0		0	0	0	0	0	0	0	0	0	0	0	0		0	100	100	100		0	0	0	0
FR	FR22	FR222	Oise	0	10	0	0	0	100	0	100	0	100	0.5	0	0		0	0	0	0	0	0	0	0	0	0	0	0		0	100	100	100		0	0	0	0
FR	FR22	FR223	Somme	0	10	0	0	0	100	0	100	0	100	0.5	0	0		0	0	0	0	0	0	0	0	0	0	0	0		0	100	100	100		0	0	0	0
FR	FR23	FR231	Eure	0	10	0	0	0	100	0	100	0	100	0.5	0	0		6.81945	6.13751	6.13751	6.13751	0	0	0	6.10682	6.10682	0	0	0		6.13751	100	100	100		100	0	6.13751	100
FR	FR23	FR232	Seine-Maritime	0	10	0	0	0	100	0	100	0	100	0.5	0	0		0	0	0	0	0	0	0	0	0	0	0	0		0	100	100	100		0	0	0	0
FR	FR24	FR241	Cher	0	10	0	0	0	27.8454	0	100	0	100	0.5	0	0		26.2369	23.6132	23.6132	23.6132	17.038	0	0	23.4951	23.4951	16.9528	0	0		23.6132	100	100	100	BioE_COM-S	27.8454	17.038	6.57519	27.8454
FR	FR24	FR242	Eure-et-Loir	0	10	0	0	0	100	0	100	0	100	0.5	0	0		0	0	0	0	0	0	0	0	0	0	0	0		0	100	100	100		0	0	0	0
FR	FR24	FR243	Indre	0	10	0	0	0	97.1429	0	100	0	100	0.5	0	0		0	0	0	0	0	0	0	0	0	0	0	0		0	100	100	100		0	0	0	0
FR	FR24	FR244	Indre-et-Loire	0	10	0	0	0	34.42	0	100	0	100	0.5	0	0		8.36099	7.52489	7.52489	7.52489	4.93482	0	0	7.48726	7.48726	4.91015	0	0		7.52489	100	100	100	BioE_COM-S	34.42	4.93482	2.59007	34.42
FR	FR24	FR245	Loir-et-Cher	0	10	0	0	0	30.7586	0	78.0395	0	69.8995	0.5	0	0		0	0	0	0	0	0	0	0	0	0	0	0		0	100	100	100		0	0	0	0
FR	FR24	FR246	Loiret	0	10	0	0	0	100	0	100	0	100	0.5	0	0		51.6357	46.4721	46.4721	46.4721	0	0	0	46.2398	46.2398	0	0	0		46.4721	100	100	100		100	0	46.4721	100
FR	FR25	FR251	Calvados	0	10	0	0	0	29.4872	0	100	0	100	0.5	0	0		18.2473	16.4225	16.4225	16.4225	11.58	0	0	16.3404	16.3404	11.5221	0	0		16.4225	100	100	100	BioE_COM-S	29.4872	11.58	4.84255	29.4872
FR	FR25	FR252	Manche	0	10	0	0	0	0	0	0	0	0	0.5	0	0		0	0	0	0	0	0	0	0	0	0	0	0		0	100	100	100		0	0	0	0
FR	FR25	FR253	Orne	0	10	0	0	0	48.6486	0	100	0	100	0.5	0	0		0	0	0	0	0	0	0	0	0	0	0	0		0	100	100	100		0	0	0	0
FR	FR26	FR261	Cote-d'Or	0	10	0	0	0	6.90717	0	27.9806	0	33.392	0.5	0	0		0	0	0	0	0	0	0	0	0	0	0	0		0	100	100	100		0	0	0	0
FR	FR26	FR262	Nievre	0	10	0	0	0	20.0617	0	100	0	100	0.5	0	0		0	0	0	0	0	0	0	0	0	0	0	0		0	100	100	100		0	0	0	0
FR	FR26	FR263	Saone-et-Loire	0	10	0	0	0	6.23836	0	28.0881	0	32.8988	0.5	0	0		0	0	0	0	0	0	0	0	0	0	0	0		0	100	100	100		0	0	0	0
FR	FR26	FR264	Yonne	0	10	0	0	0	7.164	0	37.5962	0	86.8561	0.5	0	0		53.6634	48.2971	48.2971	48.2971	44.8371	30.1392	6.3481	48.0556	48.0556	44.6129	29.9885	6.31636		48.2971	100	100	100	BioE_COM-S	7.164	44.8371	3.46	7.164
FR	FR30	FR301	Nord	0	10	0	0	0	100	0	100	0	100	0.5	0	0		0	0	0	0	0	0	0	0	0	0	0	0		0	100	100	100		0	0	0	0
FR	FR30	FR302	Pas-de-Calais	0	10	0	0	0	100	0	100	0	100	0.5	0	0		0	0	0	0	0	0	0	0	0	0	0	0		0	100	100	100		0	0	0	0
FR	FR41	FR411	Meurthe-et-Moselle	0	10	0	0	0	100	0	100	0	100	0.5	0	0		7.70646	6.93581	6.93581	6.93581	0	0	0	6.90113	6.90113	0	0	0		6.93581	100	100	100		100	0	6.93581	100
FR	FR41	FR412	Meuse	0	10	0	0	0	100	0	100	0	100	0.5	0	0		7.43355	6.6902	6.6902	6.6902	0	0	0	6.65675	6.65675	0	0	0		6.6902	100	100	100		100	0	6.6902	100
FR	FR41	FR413	Moselle	0	10	0	0	0	100	0	100	0	100	0.5	0	0		7.85821	7.07239	7.07239	7.07239	0	0	0	7.03703	7.03703	0	0	0		7.07239	100	100	100		100	0	7.07239	100
FR	FR41	FR414	Vosges	0	10	0	0	0	100	0	100	0	100	0.5	0	0		0	0	0	0	0	0	0	0	0	0	0	0		0	100	100	100		0	0	0	0
FR	FR42	FR421	Bas-Rhin	0	10	0	0	0	46.2973	0	61.7027	0	89.5405	0.5	0	0		16.9529	15.2576	15.2576	15.2576	8.19374	5.84325	1.59586	15.1813	15.1813	8.15277	5.81403	1.58788		15.2576	100	100	100	BioE_COM-S	46.2973	8.19374	7.06385	46.2973
FR	FR42	FR422	Haut-Rhin	0	10	0	0	0	9.2231	0	18.8617	0	21.7283	0.5	0	0		7.69687	6.92718	6.92718	6.92718	6.28828	5.6206	5.42203	6.89255	6.89255	6.25684	5.5925	5.39491		6.92718	100	100	100	BioE_COM-S	9.2231	6.28828	0.638901	9.2231
FR	FR43	FR431	Doubs	0	10	0	0	0	100	0	100	0	100	0.5	0	0		0	0	0	0	0	0	0	0	0	0	0	0		0	100	100	100		0	0	0	0
FR	FR43	FR432	Jura	0	10	0	0	0	57.0144	0	100	0	100	0.5	0	0		0	0	0	0	0	0	0	0	0	0	0	0		0	100	100	100		0	0	0	0
FR	FR43	FR433	Haute-Saone	0	10	0	0	0	100	0	100	0	100	0.5	0	0		0	0	0	0	0	0	0	0	0	0	0	0		0	100	100	100		0	0	0	0
FR	FR43	FR434	Territoire de Belfort	0	10	0	0	0	0	0	0	0	0	0.5	0	0		0	0	0	0	0	0	0	0	0	0	0	0		0	100	100	100		0	0	0	0
FR	FR51	FR511	Loire-Atlantique	0	10	0	0	0	21.125	0	23.5174	0	20.056	0.5	0	0		8.16101	7.34491	7.34491	7.34491	5.7933	5.61757	5.87181	7.30818	7.30818	5.76433	5.58949	5.84245		7.34491	100	100	100	BioE_COM-L	20.056	5.87181	1.47309	20.056
FR	FR51	FR512	Maine-et-Loire	0	10	0	0	0	30.9285	0	59.4999	0	51.4095	0.5	0	0		81.8873	73.6986	73.6986	73.6986	50.9047	29.848	35.8106	73.3301	73.3301	50.6502	29.6988	35.6315		73.6986	100	100	100	BioE_COM-S	30.9285	50.9047	22.7939	30.9285
FR	FR51	FR513	Mayenne	0	10	0	0	0	100	0	100	0	100	0.5	0	0		0	0	0	0	0	0	0	0	0	0	0	0		0	100	100	100		0	0	0	0
FR	FR51	FR514	Sarthe	0	10	0	0	0	53.3118	0	98.0614	0	100	0.5	0	0		0	0	0	0	0	0	0	0	0	0	0	0		0	100	100	100		0	0	0	0
FR	FR51	FR515	Vendee	0	10	0	0	0	100	0	100	0	96.1326	0.5	0	0		0	0	0	0	0	0	0	0	0	0	0	0		0	100	100	100		0	0	0	0
FR	FR52	FR521	Cotes-d'Armor	0	10	0	0	0	0	0	0	0	0	0.5	0	0		0	0	0	0	0	0	0	0	0	0	0	0		0	100	100	100		0	0	0	0
FR	FR52	FR522	Finistere	0	10	0	0	0	0	0	0	0	0	0.5	0	0		0	0	0	0	0	0	0	0	0	0	0	0		0	100	100	100		0	0	0	0
FR	FR52	FR523	Ille-et-Vilaine	0	10	0	0	0	0	0	100	0	100	0.5	0	0		0	0	0	0	0	0	0	0	0	0	0	0		0	100	100	100		0	0	0	0
FR	FR52	FR524	Morbihan	0	10	0	0	0	0	0	0	0	0	0.5	0	0		0	0	0	0	0	0	0	0	0	0	0	0		0	100	100	100		0	0	0	0
FR	FR53	FR531	Charente	0	10	0	0.980392	0.980392	7.47186	0.980392	10.5252	0.980392	3.05336	0.5	0	0		595.584	536.026	536.026	530.771	491.112	474.906	514.564	533.346	528.117	488.657	472.531	511.991		536.026	7.47186	10.5252	3.05336	BioE_COM-L	3.05336	514.564	21.4615	4.00381
FR	FR53	FR532	Charente-Maritime	0.0753417	10	0	0.980392	0.980392	17.447	0.980392	32.8705	0.980392	17.5439	0.5	0	0		170.641	153.461	153.461	151.957	125.445	102.008	125.298	152.694	151.197	124.817	101.498	124.671		153.461	17.447	32.8705	17.5439	BioE_COM-S	17.447	125.445	28.0164	18.2563
FR	FR53	FR533	Deux-Sevres	0	10	0	0.980392	0.980392	65.6051	0.980392	100	0.980392	100	0.5	0	0		59.2767	53.349	53.349	52.826	18.1695	0	0	53.0823	52.5619	18.0786	0	0		53.349	65.6051	100	100	BioE_COM-S	65.6051	18.1695	35.1796	65.9423
FR	FR53	FR534	Vienne	0	10	0	0.980392	0.980392	100	0.980392	100	0.980392	100	0.5	0	0		68.0699	61.2629	61.2629	60.6623	0	0	0	60.9566	60.359	0	0	0		61.2629	100	100	100		100	0	61.2629	100
FR	FR61	FR611	Dordogne	0	10	0	1.7316	1.7316	13.8908	1.7316	17.0825	1.7316	13.5986	0.5	0	0		5482.73	4934.46	4934.46	4849.02	4175.45	4020.68	4189.62	4909.79	4824.77	4154.57	4000.58	4168.67		4934.46	13.8908	17.0825	13.5986	BioE_COM-L	13.5986	4189.62	744.842	15.0947
FR	FR61	FR612	Gironde	0.0721848	10	0	1.7316	1.7316	2.38811	1.7316	4.50253	1.7316	1.64822	0.5	0	0		336.216	302.376	302.376	297.14	290.044	283.762	292.243	300.864	295.655	288.594	282.343	290.782		302.376	2.38811	4.50253	1.64822	BioE_COM-L	1.64822	292.243	10.1335	3.35128
FR	FR61	FR613	Landes	0	10	0	1.7316	1.7316	18.1237	1.7316	43.9232	1.7316	25.3731	0.5	0	0		0	0	0	0	0	0	0	0	0	0	0	0		0	18.1237	43.9232	25.3731		0	0	0	0
FR	FR61	FR614	Lot-et-Garonne	0	10	0	1.7316	1.7316	23.4016	1.7316	49.7207	1.7316	39.1993	0.5	0	0		2242.01	2017.81	2017.81	1982.87	1518.85	996.973	1205.6	2007.72	1972.95	1511.25	991.988	1199.57		2017.81	23.4016	49.7207	39.1993	BioE_COM-S	23.4016	1518.85	498.964	24.728
FR	FR61	FR615	Pyrenees-Atlantiques	0	10	0	1.7316	1.7316	97.6471	1.7316	100	1.7316	100	0.5	0	0		97.6703	87.9033	87.9033	86.3811	2.0325	0	0	87.4637	85.9492	2.02233	0	0		87.9033	97.6471	100	100	BioE_COM-S	97.6471	2.0325	85.8708	97.6878
FR	FR62	FR621	Ariege	0	10	0	2.55814	2.55814	100	2.55814	100	2.55814	100	0.5	0	0		29.9731	26.9758	26.9758	26.2857	0	0	0	26.8409	26.1542	0	0	0		26.9758	100	100	100		100	0	26.9758	100
FR	FR62	FR622	Aveyron	20.4819	10	0	2.55814	2.55814	12.0482	2.55814	100	2.55814	100	0.5	0	0		30.9734	22.1665	22.1665	21.5995	18.9971	0	0	22.0557	21.4915	18.9021	0	0		22.1665	12.0482	100	100	BioE_COM-S	12.0482	18.9971	3.16939	14.2981
FR	FR62	FR623	Haute-Garonne	0	10	0	2.55814	2.55814	6.36183	2.55814	26.5408	2.55814	22.7634	0.5	0	0		17.1395	15.4255	15.4255	15.0309	14.0747	11.0416	11.6094	15.3484	14.9558	14.0043	10.9864	11.5513		15.4255	6.36183	26.5408	22.7634	BioE_COM-S	6.36183	14.0747	1.35085	8.75722
FR	FR62	FR624	Gers	0	10	0	2.55814	2.55814	26.1864	2.55814	46.786	2.55814	25.1726	0.5	0	0		195.75	176.175	176.175	171.668	126.715	91.3515	128.455	175.294	170.81	126.081	90.8947	127.813		176.175	26.1864	46.786	25.1726	BioE_COM-L	25.1726	128.455	47.7201	27.0868
FR	FR62	FR625	Lot	0	10	0	2.55814	2.55814	30.2744	2.55814	96.3979	2.55814	100	0.5	0	0		2467.09	2220.38	2220.38	2163.58	1508.57	77.9334	0	2209.28	2152.76	1501.03	77.5437	0		2220.38	30.2744	96.3979	100	BioE_COM-S	30.2744	1508.57	711.812	32.0581
FR	FR62	FR626	Hautes-Pyrenees	0	10	0	2.55814	2.55814	100	2.55814	100	2.55814	100	0.5	0	0		30.9334	27.8401	27.8401	27.1279	0	0	0	27.7009	26.9923	0	0	0		27.8401	100	100	100		100	0	27.8401	100
FR	FR62	FR627	Tarn	0	10	0	2.55814	2.55814	10.0177	2.55814	18.9518	2.55814	8.53605	0.5	0	0		58.6782	52.8104	52.8104	51.4594	46.3043	41.7069	47.0668	52.5463	51.2021	46.0728	41.4984	46.8315		52.8104	10.0177	18.9518	8.53605	BioE_COM-L	8.53605	47.0668	5.74356	10.8758
FR	FR62	FR628	Tarn-et-Garonne	0	10	0	2.55814	2.55814	8.08246	2.55814	20.5825	2.55814	13.7435	0.5	0	0		889.51	800.559	800.559	780.079	717.03	619.52	672.87	796.556	776.179	713.445	616.422	669.505		800.559	8.08246	20.5825	13.7435	BioE_COM-S	8.08246	717.03	83.529	10.4338
FR	FR63	FR631	Correze	0	10	0	4.31655	4.31655	33.3333	4.31655	73.8318	4.31655	100	0.5	0	0		897.756	807.98	807.98	773.103	515.402	202.307	0	803.94	769.238	512.825	201.296	0		807.98	33.3333	73.8318	100	BioE_COM-S	33.3333	515.402	292.578	36.211
FR	FR63	FR632	Creuse	0	10	0	4.31655	4.31655	0	4.31655	0	4.31655	0	0.5	0	0		0	0	0	0	0	0	0	0	0	0	0	0		0	0	0	0		0	0	0	0
FR	FR63	FR633	Haute-Vienne	0	10	0	4.31655	4.31655	100	4.31655	100	4.31655	100	0.5	0	0		116.909	105.218	105.218	100.676	0	0	0	104.692	100.173	0	0	0		105.218	100	100	100		100	0	105.218	100
FR	FR71	FR711	Ain	2.25225	10	0	1.69867	1.69867	100	1.69867	100	1.69867	100	0.5	0	0		8.59535	7.56159	7.56159	7.43314	0	0	0	7.52378	7.39597	0	0	0		7.56159	100	100	100		100	0	7.56159	100
FR	FR71	FR712	Ardeche	0	10	0	1.69867	1.69867	24.5112	1.69867	68.7649	1.69867	58.6552	0.5	0	0		2480.95	2232.86	2232.86	2194.93	1656.93	685.588	907.489	2221.69	2183.95	1648.64	682.16	902.951		2232.86	24.5112	68.7649	58.6552	BioE_COM-S	24.5112	1656.93	575.933	25.7935
FR	FR71	FR713	Drome	0.52654	10	0	1.69867	1.69867	14.302	1.69867	21.0474	1.69867	18.0305	0.5	0	0		2347.83	2101.92	2101.92	2066.22	1770.71	1631.33	1693.67	2091.41	2055.89	1761.85	1623.18	1685.2		2101.92	14.302	21.0474	18.0305	BioE_COM-S	14.302	1770.71	331.215	15.7577
FR	FR71	FR714	Isere	2.06612	10	0	1.69867	1.69867	14.4628	1.69867	25.2525	1.69867	33.7925	0.5	0	0		6217.84	5480.44	5480.44	5387.34	4608.18	4026.9	3566.83	5453.03	5360.4	4585.14	4006.77	3548.99		5480.44	14.4628	25.2525	33.7925	BioE_COM-S	14.4628	4608.18	872.255	15.9158
FR	FR71	FR715	Loire	0	10	0	1.69867	1.69867	4.42055	1.69867	46.595	1.69867	43.1302	0.5	0	0		0	0	0	0	0	0	0	0	0	0	0	0		0	4.42055	46.595	43.1302		0	0	0	0
FR	FR71	FR716	Rhone	0	10	0	1.69867	1.69867	4.62339	1.69867	15.3552	1.69867	10.5328	0.5	0	0		0	0	0	0	0	0	0	0	0	0	0	0		0	4.62339	15.3552	10.5328		0	0	0	0
FR	FR71	FR717	Savoie	17.8177	10	0	1.69867	1.69867	56.0773	1.69867	100	1.69867	100	0.5	0	0		49.3738	36.5189	36.5189	35.8985	15.7676	0	0	36.3363	35.719	15.6887	0	0		36.5189	56.0773	100	100	BioE_COM-S	56.0773	15.7676	20.7513	56.8234
FR	FR71	FR718	Haute-Savoie	0	10	0	1.69867	1.69867	100	1.69867	100	1.69867	100	0.5	0	0		0	0	0	0	0	0	0	0	0	0	0	0		0	100	100	100		0	0	0	0
FR	FR72	FR721	Allier	0	10	0	0	0	100	0	100	0	100	0.5	0	0		0	0	0	0	0	0	0	0	0	0	0	0		0	100	100	100		0	0	0	0
FR	FR72	FR722	Cantal	0	10	0	0	0	0	0	0	0	0	0.5	0	0		5.75497	5.17947	5.17947	5.17947	5.17947	5.17947	5.17947	5.15358	5.15358	5.15358	5.15358	5.15358		5.17947	100	100	100	BioE_COM-S & BioE_COM-M & BioE_COM-L	0	5.17947	0	0
FR	FR72	FR723	Haute-Loire	0	10	0	0	0	0	0	0	0	0	0.5	0	0		0	0	0	0	0	0	0	0	0	0	0	0		0	100	100	100		0	0	0	0
FR	FR72	FR724	Puy-de-Dome	0	10	0	0	0	100	0	100	0	100	0.5	0	0		25.586	23.0274	23.0274	23.0274	0	0	0	22.9122	22.9122	0	0	0		23.0274	100	100	100		100	0	23.0274	100
FR	FR81	FR811	Aude	0.150173	10	0	4.21687	4.21687	3.48025	4.21687	8.82265	4.21687	0.570656	0.5	0	0		121.362	109.062	109.062	104.463	100.827	95.2464	103.867	108.516	103.94	100.323	94.7702	103.347		109.062	3.48025	8.82265	0.570656	BioE_COM-L	0.570656	103.867	5.19511	4.76346
FR	FR81	FR812	Gard	0.00397062	10	0	4.21687	4.21687	4.89577	4.21687	8.13977	4.21687	2.65237	0.5	0	0		352.024	316.809	316.809	303.45	288.594	278.75	295.401	315.225	301.933	287.151	277.356	293.924		316.809	4.89577	8.13977	2.65237	BioE_COM-L	2.65237	295.401	21.4081	6.75739
FR	FR81	FR813	Herault	0.229795	10	0	4.21687	4.21687	5.68137	4.21687	8.48124	4.21687	2.05001	0.5	0	0		359.855	323.125	323.125	309.499	291.915	283.25	303.154	321.509	307.952	290.456	281.834	301.639		323.125	5.68137	8.48124	2.05001	BioE_COM-L	2.05001	303.154	19.9705	6.18043
FR	FR81	FR814	Lozere	0.229795	10	0	4.21687	4.21687	0	4.21687	0	4.21687	0	0.5	0	0		313.555	281.551	281.551	269.679	269.679	269.679	269.679	280.143	268.33	268.33	268.33	268.33		281.551	0	0	0	BioE_COM-S & BioE_COM-M & BioE_COM-L	0	269.679	11.8726	4.21687
FR	FR81	FR815	Pyrenees-Orientales	0.188398	10	0	4.21687	4.21687	4.81984	4.21687	11.3588	4.21687	7.15127	0.5	0	0		78.7337	70.7268	70.7268	67.7443	64.4792	60.0494	62.8998	70.3732	67.4056	64.1568	59.7491	62.5853		70.7268	4.81984	11.3588	7.15127	BioE_COM-S	4.81984	64.4792	6.24763	8.83347
FR	FR82	FR821	Alpes-de-Haute-Provence	0	10	0	2.8169	2.8169	42.0334	2.8169	59.7876	2.8169	94.5372	0.5	0	0		64.3835	57.9452	57.9452	56.3129	32.6427	22.6448	3.07627	57.6554	56.0313	32.4795	22.5316	3.06089		57.9452	42.0334	59.7876	94.5372	BioE_COM-S	42.0334	32.6427	25.3025	43.6662
FR	FR82	FR822	Hautes-Alpes	0.619195	10	0	2.8169	2.8169	17.6471	2.8169	24.2518	2.8169	86.9969	0.5	0	0		57.0887	51.0616	51.0616	49.6233	40.8662	37.5887	6.45256	50.8063	49.3752	40.6619	37.4008	6.4203		51.0616	17.6471	24.2518	86.9969	BioE_COM-S	17.6471	40.8662	10.1954	19.9669
FR	FR82	FR823	Alpes-Maritimes	10.2142	10	0	2.8169	2.8169	64.4152	2.8169	100	2.8169	100	0.5	0	0		7.47842	6.04311	6.04311	5.87288	2.08985	0	0	6.01289	5.84351	2.07941	0	0		6.04311	64.4152	100	100	BioE_COM-S	64.4152	2.08985	3.95325	65.4175
FR	FR82	FR824	Bouches-du-Rhone	0.0852031	10	0	2.8169	2.8169	25.3763	2.8169	42.6015	2.8169	29.2673	0.5	0	0		66.2025	59.5315	59.5315	57.8546	43.1732	33.2076	40.9221	59.2339	57.5653	42.9574	33.0416	40.7175		59.5315	25.3763	42.6015	29.2673	BioE_COM-S	25.3763	43.1732	16.3583	27.4784
FR	FR82	FR825	Var	0.178627	10	0	2.8169	2.8169	16.8065	2.8169	45.876	2.8169	26.1417	0.5	0	0		262.395	235.734	235.734	229.094	190.591	123.995	169.205	234.555	227.948	189.638	123.375	168.359		235.734	16.8065	45.876	26.1417	BioE_COM-S	16.8065	190.591	45.1429	19.1499
FR	FR82	FR826	Vaucluse	0.011556	10	0	2.8169	2.8169	2.67522	2.8169	5.55844	2.8169	2.91212	0.5	0	0		92.603	83.333	83.333	80.9856	78.8191	76.4841	78.6272	82.9164	80.5807	78.425	76.1017	78.2341		83.333	2.67522	5.55844	2.91212	BioE_COM-S	2.67522	78.8191	4.51395	5.41676
FR	FR83	FR831	Corse-du-Sud	5.26316	10	0	1.14286	1.14286	100	1.14286	100	1.14286	100	0.5	0	0		244.062	208.095	208.095	205.717	0	0	0	207.054	204.688	0	0	0		208.095	100	100	100		100	0	208.095	100
FR	FR83	FR832	Haute-Corse	0.0390625	10	0	1.14286	1.14286	27.9297	1.14286	66.4062	1.14286	100	0.5	0	0		1051.54	946.02	946.02	935.209	674.008	314.172	0	941.29	930.533	670.638	312.601	0		946.02	27.9297	66.4062	100	BioE_COM-S	27.9297	674.008	272.013	28.7533
FR	FRA1	FRA10	Guadeloupe	0.0390625	10	0	0	0	0	0	0	0	0	0.5	0	0		0	0	0	0	0	0	0	0	0	0	0	0		0	100	100	100		0	0	0	0
FR	FRA2	FRA20	Martinique	0.0390625	10	0	0	0	0	0	0	0	0	0.5	0	0		0	0	0	0	0	0	0	0	0	0	0	0		0	100	100	100		0	0	0	0
FR	FRA3	FRA30	Guyane	0.0390625	10	0	0	0	0	0	0	0	0	0.5	0	0		0	0	0	0	0	0	0	0	0	0	0	0		0	100	100	100		0	0	0	0
FR	FRA4	FRA40	La Reunion	0.0390625	10	0	0	0	0	0	0	0	0	0.5	0	0		0	0	0	0	0	0	0	0	0	0	0	0		0	100	100	100		0	0	0	0
HR	HR03	HR031	Primorsko-Goranska Zupanija	2.78422	10	0	53.8462	53.8462	82.5986	53.8462	100	53.8462	100	30	0	0		15.0633	13.1795	13.1795	6.08283	1.0585	0	0	9.22563	4.25798	0.740948	0	0		13.1795	82.5986	100	100	BioE_COM-S	82.5986	1.0585	12.121	91.9686
HR	HR03	HR032	Licko-Senjska Zupanija	12.5828	10	0	53.8462	53.8462	100	53.8462	100	53.8462	100	30	0	0		6.74071	5.30329	5.30329	2.44767	0	0	0	3.7123	1.71337	0	0	0		5.30329	100	100	100		100	0	5.30329	100
HR	HR03	HR033	Zadarska Zupanija	4.52518	10	0	53.8462	53.8462	78.84	53.8462	100	53.8462	100	30	0	0		70.8213	60.8549	60.8549	28.0869	5.94317	0	0	42.5984	19.6608	4.16022	0	0		60.8549	78.84	100	100	BioE_COM-S	78.84	5.94317	54.9117	90.2339
HR	HR03	HR034	Sibensko-Kninska Zupanija	4.2328	10	0	53.8462	53.8462	31.0185	53.8462	87.5	53.8462	100	30	0	0		135.22	116.547	116.547	53.7909	37.1058	6.72387	0	81.5829	37.6537	25.974	4.70671	0		116.547	31.0185	87.5	100	BioE_COM-S	31.0185	37.1058	79.4412	68.1624
HR	HR03	HR035	Splitsko-Dalmatinska Zupanija	9.2623	10	0	53.8462	53.8462	61.3934	53.8462	100	53.8462	100	30	0	0		55.5371	45.3538	45.3538	20.9325	8.08133	0	0	31.7477	14.6528	5.65693	0	0		45.3538	61.3934	100	100	BioE_COM-S	61.3934	8.08133	37.2725	82.1816
HR	HR03	HR036	Istarska Zupanija	0.0794281	10	0	53.8462	53.8462	47.8157	53.8462	99.8411	53.8462	100	30	0	0		66.7099	59.9913	59.9913	27.6883	14.4489	0.0439845	0	41.9939	19.3818	10.1142	0.0307892	0		59.9913	47.8157	99.8411	100	BioE_COM-S	47.8157	14.4489	45.5423	75.915
HR	HR03	HR037	Dubrovacko-Neretvanska Zupanija	4.11208	10	0	53.8462	53.8462	34.9345	53.8462	77.8384	53.8462	100	30	0	0		8.75407	7.55469	7.55469	3.48678	2.26869	0.772725	0	5.28828	2.44074	1.58808	0.540907	0		7.55469	34.9345	77.8384	100	BioE_COM-S	34.9345	2.26869	5.286	69.9698
HR	HR04	HR041	Grad Zagreb	4.11208	10	0	24.1653	24.1653	0	24.1653	0	24.1653	0	30	0	0		349.198	301.355	301.355	228.531	228.531	228.531	228.531	210.948	159.972	159.972	159.972	159.972		301.355	0	0	0	BioE_COM-S & BioE_COM-M & BioE_COM-L	0	228.531	72.8234	24.1653
HR	HR04	HR042	Zagrebacka Zupanija	0	10	0	24.1653	24.1653	6.66667	24.1653	100	24.1653	100	30	0	0		276.674	249.007	249.007	188.834	176.245	0	0	174.305	132.184	123.371	0	0		249.007	6.66667	100	100	BioE_COM-S	6.66667	176.245	72.7623	29.221
HR	HR04	HR043	Krapinsko-Zagorska Zupanija	0	10	0	24.1653	24.1653	27.7778	24.1653	100	24.1653	100	30	0	0		220	198	198	150.153	108.444	0	0	138.6	105.107	75.9105	0	0		198	27.7778	100	100	BioE_COM-S	27.7778	108.444	89.5564	45.2305
HR	HR04	HR044	Varazdinska Zupanija	0	10	0	24.1653	24.1653	93.3333	24.1653	100	24.1653	100	30	0	0		490	441	441	334.431	22.2954	0	0	308.7	234.102	15.6068	0	0		441	93.3333	100	100	BioE_COM-S	93.3333	22.2954	418.705	94.9444
HR	HR04	HR045	Koprivnicko-Krizevacka Zupanija	0	10	0	24.1653	24.1653	0	24.1653	0	24.1653	0	30	0	0		350	315	315	238.879	238.879	238.879	238.879	220.5	167.215	167.215	167.215	167.215		315	0	0	0	BioE_COM-S & BioE_COM-M & BioE_COM-L	0	238.879	76.1208	24.1653
HR	HR04	HR046	Medimurska Zupanija	0	10	0	24.1653	24.1653	3.78788	24.1653	100	24.1653	100	30	0	0		210	189	189	143.328	137.898	0	0	132.3	100.329	96.5289	0	0		189	3.78788	100	100	BioE_COM-S	3.78788	137.898	51.1016	27.0379
HR	HR04	HR047	Bjelovarsko-Bilogorska Zupanija	0	10	0	24.1653	24.1653	100	24.1653	100	24.1653	100	30	0	0		859.665	773.699	773.699	586.732	0	0	0	541.589	410.712	0	0	0		773.699	100	100	100		100	0	773.699	100
HR	HR04	HR048	Viroviticko-Podravska Zupanija	0	10	0	24.1653	24.1653	43.1373	24.1653	100	24.1653	100	30	0	0		707.049	636.344	636.344	482.57	274.402	0	0	445.441	337.799	192.082	0	0		636.344	43.1373	100	100	BioE_COM-S	43.1373	274.402	361.942	56.8783
HR	HR04	HR049	Pozesko-Slavonska Zupanija	0	10	0	24.1653	24.1653	62.3077	24.1653	100	24.1653	100	30	0	0		512.268	461.041	461.041	349.629	131.783	0	0	322.729	244.74	92.2483	0	0		461.041	62.3077	100	100	BioE_COM-S	62.3077	131.783	329.258	71.4162
HR	HR04	HR04A	Brodsko-Posavska Zupanija	0	10	0	24.1653	24.1653	25.731	24.1653	100	24.1653	100	30	0	0		356.979	321.281	321.281	243.642	180.951	0	0	224.897	170.55	126.665	0	0		321.281	25.731	100	100	BioE_COM-S	25.731	180.951	140.33	43.6784
HR	HR04	HR04B	Osjecko-Baranjska Zupanija	0	10	0	24.1653	24.1653	9.80114	24.1653	67.0455	24.1653	100	30	0	0		1089.13	980.221	980.221	743.347	670.491	244.967	0	686.154	520.343	469.343	171.477	0		980.221	9.80114	67.0455	100	BioE_COM-S	9.80114	670.491	309.73	31.598
HR	HR04	HR04C	Vukovarsko-Srijemska Zupanija	0	10	0	24.1653	24.1653	14.3137	24.1653	61.3725	24.1653	100	30	0	0		270	243	243	184.278	157.901	71.182	0	170.1	128.995	110.531	49.8274	0		243	14.3137	61.3725	100	BioE_COM-S	14.3137	157.901	85.0989	35.0201
HR	HR04	HR04D	Karlovacka Zupanija	0	10	0	24.1653	24.1653	100	24.1653	100	24.1653	100	30	0	0		110.96	99.8643	99.8643	75.7317	0	0	0	69.905	53.0122	0	0	0		99.8643	100	100	100		100	0	99.8643	100
HR	HR04	HR04E	Sisacko-Moslavacka Zupanija	0	10	0	24.1653	24.1653	10.989	24.1653	100	24.1653	100	30	0	0		439.99	395.991	395.991	300.299	267.299	0	0	277.194	210.209	187.109	0	0		395.991	10.989	100	100	BioE_COM-S	10.989	267.299	128.693	32.4988
HU	HU10	HU101	Budapest	0	10	0	23.0769	23.0769	100	23.0769	100	23.0769	100	0	0	0		52.7599	47.4839	47.4839	36.5261	0	0	0	47.4839	36.5261	0	0	0		47.4839	100	100	100		100	0	47.4839	100
HU	HU10	HU102	Pest	0	10	0	23.0769	23.0769	51.8344	23.0769	99.4441	23.0769	100	0	0	0		185.732	167.159	167.159	128.584	61.9333	0.714752	0	167.159	128.584	61.9333	0.714752	0		167.159	51.8344	99.4441	100	BioE_COM-S	51.8344	61.9333	105.226	62.9495
HU	HU21	HU211	Fejer	0	10	0	25	25	73.0878	25	100	25	100	0	0	0		177.614	159.853	159.853	119.89	32.2649	0	0	159.853	119.89	32.2649	0	0		159.853	73.0878	100	100	BioE_COM-S	73.0878	32.2649	127.588	79.8159
HU	HU21	HU212	Komarom-Esztergom	0	10	0	25	25	98.4602	25	100	25	100	0	0	0		61.9651	55.7686	55.7686	41.8265	0.644035	0	0	55.7686	41.8265	0.644035	0	0		55.7686	98.4602	100	100	BioE_COM-S	98.4602	0.644035	55.1246	98.8452
HU	HU21	HU213	Veszprem	0	10	0	25	25	94.0329	25	100	25	100	0	0	0		173.44	156.096	156.096	117.072	6.98586	0	0	156.096	117.072	6.98586	0	0		156.096	94.0329	100	100	BioE_COM-S	94.0329	6.98586	149.11	95.5246
HU	HU22	HU221	Gyor-Moson-Sopron	0	10	0	27.3684	27.3684	95.4307	27.3684	100	27.3684	100	0	0	0		302.084	271.875	271.875	197.467	9.02285	0	0	271.875	197.467	9.02285	0	0		271.875	95.4307	100	100	BioE_COM-S	95.4307	9.02285	262.852	96.6813
HU	HU22	HU222	Vas	0	10	0	27.3684	27.3684	80.5774	27.3684	100	27.3684	100	0	0	0		378.498	340.648	340.648	247.418	48.0549	0	0	340.648	247.418	48.0549	0	0		340.648	80.5774	100	100	BioE_COM-S	80.5774	48.0549	292.593	85.8931
HU	HU22	HU223	Zala	0	10	0	27.3684	27.3684	95.3101	27.3684	100	27.3684	100	0	0	0		240	216	216	156.884	7.35766	0	0	216	156.884	7.35766	0	0		216	95.3101	100	100	BioE_COM-S	95.3101	7.35766	208.642	96.5937
HU	HU23	HU231	Baranya	0	10	0	17.3913	17.3913	71.9337	17.3913	100	17.3913	100	0	0	0		219.083	197.174	197.174	162.883	45.7154	0	0	197.174	162.883	45.7154	0	0		197.174	71.9337	100	100	BioE_COM-S	71.9337	45.7154	151.459	76.8148
HU	HU23	HU232	Somogy	0	10	0	17.3913	17.3913	65.1393	17.3913	99.8111	17.3913	100	0	0	0		757.98	682.182	682.182	563.542	196.454	1.06479	0	682.182	563.542	196.454	1.06479	0		682.182	65.1393	99.8111	100	BioE_COM-S	65.1393	196.454	485.728	71.2021
HU	HU23	HU233	Tolna	0	10	0	17.3913	17.3913	74.251	17.3913	100	17.3913	100	0	0	0		151.762	136.586	136.586	112.832	29.0531	0	0	136.586	112.832	29.0531	0	0		136.586	74.251	100	100	BioE_COM-S	74.251	29.0531	107.533	78.7291
HU	HU31	HU311	Borsod-Abauj-Zemplen	0	10	0	13.1313	13.1313	45.7715	13.1313	97.5454	13.1313	99.8144	0	0	0		638.606	574.745	574.745	499.274	270.749	12.2553	0.92687	574.745	499.274	270.749	12.2553	0.92687		574.745	45.7715	97.5454	99.8144	BioE_COM-S	45.7715	270.749	303.996	52.8924
HU	HU31	HU312	Heves	0	10	0	13.1313	13.1313	28.0357	13.1313	84.2489	13.1313	99.0472	0	0	0		179.958	161.962	161.962	140.694	101.25	22.1609	1.34049	161.962	140.694	101.25	22.1609	1.34049		161.962	28.0357	84.2489	99.0472	BioE_COM-S	28.0357	101.25	60.7124	37.4855
HU	HU31	HU313	Nograd	0	10	0	13.1313	13.1313	77.4869	13.1313	100	13.1313	100	0	0	0		144.368	129.931	129.931	112.869	25.4104	0	0	129.931	112.869	25.4104	0	0		129.931	77.4869	100	100	BioE_COM-S	77.4869	25.4104	104.521	80.4432
HU	HU32	HU321	Hajdu-Bihar	0	10	0	9.86547	9.86547	52.0433	9.86547	82.4519	9.86547	76.5625	0	0	0		77.5373	69.7835	69.7835	62.8991	30.1643	11.0376	14.742	69.7835	62.8991	30.1643	11.0376	14.742		69.7835	52.0433	82.4519	76.5625	BioE_COM-S	52.0433	30.1643	39.6192	56.7744
HU	HU32	HU322	Jasz-Nagykun-Szolnok	0	10	0	9.86547	9.86547	65.0881	9.86547	98.348	9.86547	100	0	0	0		61.7059	55.5353	55.5353	50.0565	17.4757	0.826924	0	55.5353	50.0565	17.4757	0.826924	0		55.5353	65.0881	98.348	100	BioE_COM-S	65.0881	17.4757	38.0596	68.5323
HU	HU32	HU323	Szabolcs-Szatmar-Bereg	0	10	0	9.86547	9.86547	17.9078	9.86547	31.9694	9.86547	11.2384	0	0	0		2089.97	1880.97	1880.97	1695.41	1391.8	1153.4	1504.87	1880.97	1695.41	1391.8	1153.4	1504.87		1880.97	17.9078	31.9694	11.2384	BioE_COM-L	11.2384	1504.87	376.104	19.9952
HU	HU33	HU331	Bacs-Kiskun	0	10	0	14.0351	14.0351	27.0023	14.0351	53.0687	14.0351	36.0753	0	0	0		161.46	145.314	145.314	124.919	91.188	58.6261	79.8541	145.314	124.919	91.188	58.6261	79.8541		145.314	27.0023	53.0687	36.0753	BioE_COM-S	27.0023	91.188	54.1259	37.2476
HU	HU33	HU332	Bekes	0	10	0	14.0351	14.0351	100	14.0351	100	14.0351	100	0	0	0		217.813	196.031	196.031	168.518	0	0	0	196.031	168.518	0	0	0		196.031	100	100	100		100	0	196.031	100
HU	HU33	HU333	Csongrad	0	10	0	14.0351	14.0351	65.4063	14.0351	96.1384	14.0351	100	0	0	0		130.152	117.136	117.136	100.696	34.8346	3.88851	0	117.136	100.696	34.8346	3.88851	0		117.136	65.4063	96.1384	100	BioE_COM-S	65.4063	34.8346	82.3018	70.2615
IE	IE01	IE011	Border	0	10	0	0	0	0	0	0	0	0	0	0	0		0	0	0	0	0	0	0	0	0	0	0	0		0	100	100	100		0	0	0	0
IE	IE01	IE012	Midland	0	10	0	0	0	0	0	0	0	0	0	0	0		0	0	0	0	0	0	0	0	0	0	0	0		0	100	100	100		0	0	0	0
IE	IE01	IE013	West	0	10	0	0	0	0	0	0	0	0	0	0	0		0	0	0	0	0	0	0	0	0	0	0	0		0	100	100	100		0	0	0	0
IE	IE02	IE021	Dublin	0	10	0	0	0	0	0	0	0	0	0	0	0		0	0	0	0	0	0	0	0	0	0	0	0		0	100	100	100		0	0	0	0
IE	IE02	IE022	Mid-East	0	10	0	0	0	0	0	0	0	0	0	0	0		0	0	0	0	0	0	0	0	0	0	0	0		0	100	100	100		0	0	0	0
IE	IE02	IE023	Mid-West	0	10	0	0	0	0	0	0	0	0	0	0	0		0	0	0	0	0	0	0	0	0	0	0	0		0	100	100	100		0	0	0	0
IE	IE02	IE024	South-East (IE)	0	10	0	0	0	0	0	0	0	0	0	0	0		0	0	0	0	0	0	0	0	0	0	0	0		0	100	100	100		0	0	0	0
IE	IE02	IE025	South-West (IE)	0	10	0	0	0	0	0	0	0	0	0	0	0		0	0	0	0	0	0	0	0	0	0	0	0		0	100	100	100		0	0	0	0
IT	ITC1	ITC11	Torino	5.75221	10	0	10.4892	10.4892	73.0088	10.4892	79.2035	10.4892	99.115	30	0	0		545.098	462.369	462.369	413.87	111.708	86.0703	3.66257	323.658	289.709	78.1958	60.2492	2.5638		462.369	73.0088	79.2035	99.115	BioE_COM-S	73.0088	111.708	350.66	75.84
IT	ITC1	ITC12	Vercelli	0	10	0	10.4892	10.4892	0	10.4892	0	10.4892	100	30	0	0		52.5707	47.3137	47.3137	42.3508	42.3508	42.3508	0	33.1196	29.6456	29.6456	29.6456	0		47.3137	0	0	100	BioE_COM-S & BioE_COM-M	0	42.3508	4.96282	10.4892
IT	ITC1	ITC13	Biella	0	10	0	10.4892	10.4892	16.6667	10.4892	0	10.4892	100	30	0	0		26.3094	23.6784	23.6784	21.1948	17.6623	21.1948	0	16.5749	14.8363	12.3636	14.8363	0		23.6784	16.6667	0	100	BioE_COM-M	0	21.1948	2.48368	10.4892
IT	ITC1	ITC14	Verbano-Cusio-Ossola	0	10	0	10.4892	10.4892	0	10.4892	0	10.4892	0	30	0	0		6.51718	5.86546	5.86546	5.25022	5.25022	5.25022	5.25022	4.10582	3.67515	3.67515	3.67515	3.67515		5.86546	0	0	0	BioE_COM-S & BioE_COM-M & BioE_COM-L	0	5.25022	0.61524	10.4892
IT	ITC1	ITC15	Novara	0	10	0	10.4892	10.4892	100	10.4892	100	10.4892	100	30	0	0		29.446	26.5014	26.5014	23.7216	0	0	0	18.551	16.6051	0	0	0		26.5014	100	100	100		100	0	26.5014	100
IT	ITC1	ITC16	Cuneo	0.307613	10	0	10.4892	10.4892	1.07665	10.4892	1.97385	10.4892	2.384	30	0	0		14657.7	13151.4	13151.4	11771.9	11645.1	11539.5	11491.2	9205.95	8240.32	8151.6	8077.67	8043.87		13151.4	1.07665	1.97385	2.384	BioE_COM-S	1.07665	11645.1	1506.21	11.4529
IT	ITC1	ITC17	Asti	0	10	0	10.4892	10.4892	5.98876	10.4892	6.81419	10.4892	3.72322	30	0	0		2997.23	2697.51	2697.51	2414.56	2269.96	2250.03	2324.66	1888.26	1690.19	1588.97	1575.02	1627.26		2697.51	5.98876	6.81419	3.72322	BioE_COM-L	3.72322	2324.66	372.847	13.8219
IT	ITC1	ITC18	Alessandria	0	10	0	10.4892	10.4892	13.157	10.4892	36.5124	10.4892	37.6262	30	0	0		1370.52	1233.46	1233.46	1104.08	958.82	700.957	688.659	863.425	772.859	671.174	490.67	482.061		1233.46	13.157	36.5124	37.6262	BioE_COM-S	13.157	958.82	274.645	22.2661
IT	ITC2	ITC20	Valle d'Aosta/Vallee D'Aoste	23.4848	10	0	40	40	100	40	100	40	100	30	0	0		50.1879	34.5612	34.5612	20.7367	0	0	0	24.1929	14.5157	0	0	0		34.5612	100	100	100		100	0	34.5612	100
IT	ITC3	ITC31	Imperia	4.50089	10	0	17.8218	17.8218	19.2068	17.8218	33.066	17.8218	34.7594	30	0	0		100.516	86.393	86.393	70.9962	57.3601	47.5206	46.3184	60.4751	49.6973	40.1521	33.2644	32.4229		86.393	19.2068	33.066	34.7594	BioE_COM-S	19.2068	57.3601	29.0329	33.6056
IT	ITC3	ITC32	Savona	5.27778	10	0	17.8218	17.8218	84.1667	17.8218	99.7222	17.8218	95.5556	30	0	0		155.327	132.416	132.416	108.817	17.2294	0.30227	4.83633	92.6914	76.1721	12.0606	0.211589	3.38543		132.416	84.1667	99.7222	95.5556	BioE_COM-S	84.1667	17.2294	115.187	86.9884
IT	ITC3	ITC33	Genova	6.59341	10	0	17.8218	17.8218	100	17.8218	100	17.8218	100	30	0	0		461.629	388.073	388.073	318.911	0	0	0	271.651	223.238	0	0	0		388.073	100	100	100		100	0	388.073	100
IT	ITC3	ITC34	La Spezia	12.459	10	0	17.8218	17.8218	98.0328	17.8218	100	17.8218	100	30	0	0		140.548	110.733	110.733	90.9987	1.79014	0	0	77.5134	63.6991	1.2531	0	0		110.733	98.0328	100	100	BioE_COM-S	98.0328	1.79014	108.943	98.3834
IT	ITC4	ITC41	Varese	12.459	10	0	9.67742	9.67742	0	9.67742	0	9.67742	0	30	0	0		39.0751	30.7861	30.7861	27.8068	27.8068	27.8068	27.8068	21.5502	19.4647	19.4647	19.4647	19.4647		30.7861	0	0	0	BioE_COM-S & BioE_COM-M & BioE_COM-L	0	27.8068	2.9793	9.67742
IT	ITC4	ITC42	Como	12.459	10	0	9.67742	9.67742	0	9.67742	0	9.67742	0	30	0	0		47.4169	37.3583	37.3583	33.743	33.743	33.743	33.743	26.1508	23.6201	23.6201	23.6201	23.6201		37.3583	0	0	0	BioE_COM-S & BioE_COM-M & BioE_COM-L	0	33.743	3.61532	9.67742
IT	ITC4	ITC43	Lecco	0	10	0	9.67742	9.67742	100	9.67742	100	9.67742	100	30	0	0		79.9098	71.9188	71.9188	64.9589	0	0	0	50.3432	45.4713	0	0	0		71.9188	100	100	100		100	0	71.9188	100
IT	ITC4	ITC44	Sondrio	43.3234	10	0	9.67742	9.67742	31.1573	9.67742	100	9.67742	100	30	0	0		36.0547	18.3911	18.3911	16.6113	11.4357	0	0	12.8738	11.6279	8.00499	0	0		18.3911	31.1573	100	100	BioE_COM-S	31.1573	11.4357	6.95542	37.8195
IT	ITC4	ITC46	Bergamo	11.7647	10	0	9.67742	9.67742	100	9.67742	100	9.67742	100	30	0	0		110.907	88.0734	88.0734	79.5501	0	0	0	61.6513	55.6851	0	0	0		88.0734	100	100	100		100	0	88.0734	100
IT	ITC4	ITC47	Brescia	8.75576	10	0	9.67742	9.67742	95.3917	9.67742	100	9.67742	74.1935	30	0	0		582.042	477.972	477.972	431.717	19.8948	0	111.411	334.58	302.202	13.9263	0	77.9875		477.972	95.3917	100	74.1935	BioE_COM-L	74.1935	111.411	366.561	76.6909
IT	ITC4	ITC48	Pavia	0	10	0	9.67742	9.67742	0.680934	9.67742	4.0856	9.67742	0.453956	30	0	0		67.3903	60.6513	60.6513	54.7818	54.4088	52.5436	54.5331	42.4559	38.3473	38.0861	36.7805	38.1732		60.6513	0.680934	4.0856	0.453956	BioE_COM-L	0.453956	54.5331	6.11816	10.0874
IT	ITC4	ITC49	Lodi	0	10	0	9.67742	9.67742	0	9.67742	100	9.67742	66.6667	30	0	0		0	0	0	0	0	0	0	0	0	0	0	0		0	0	100	66.6667		0	0	0	0
IT	ITC4	ITC4A	Cremona	0	10	0	9.67742	9.67742	100	9.67742	100	9.67742	100	30	0	0		20	18	18	16.2581	0	0	0	12.6	11.3806	0	0	0		18	100	100	100		100	0	18	100
IT	ITC4	ITC4B	Mantova	0	10	0	9.67742	9.67742	68.4211	9.67742	100	9.67742	100	30	0	0		59.9951	53.9956	53.9956	48.7702	15.4011	0	0	37.7969	34.1392	10.7808	0	0		53.9956	68.4211	100	100	BioE_COM-S	68.4211	15.4011	38.5945	71.4771
IT	ITC4	ITC4C	Milano	0	10	0	9.67742	9.67742	0	9.67742	100	9.67742	89.1089	30	0	0		19.9867	17.988	17.988	16.2472	16.2472	0	1.7695	12.5916	11.3731	11.3731	0	1.23865		17.988	0	100	89.1089	BioE_COM-S	0	16.2472	1.74077	9.67742
IT	ITC4	ITC4D	Monza e della Brianza	0	10	0	9.67742	9.67742	100	9.67742	100	9.67742	100	30	0	0		0	0	0	0	0	0	0	0	0	0	0	0		0	100	100	100		0	0	0	0
IT	ITF1	ITF11	L'Aquila	19.1919	10	0	16.8	16.8	36.6667	16.8	100	16.8	97.2727	30	0	0		257.725	187.436	187.436	155.947	98.7665	0	4.2531	131.206	109.163	69.1366	0	2.97717		187.436	36.6667	100	97.2727	BioE_COM-S	36.6667	98.7665	88.6699	47.3067
IT	ITF1	ITF12	Teramo	0.273224	10	0	16.8	16.8	50.6375	16.8	87.1585	16.8	66.8488	30	0	0		387.399	347.706	347.706	289.292	142.802	37.1495	95.9037	243.395	202.504	99.9611	26.0046	67.1326		347.706	50.6375	87.1585	66.8488	BioE_COM-S	50.6375	142.802	204.905	58.9304
IT	ITF1	ITF13	Pescara	0	10	0	16.8	16.8	2.3277	16.8	5.81926	16.8	0	30	0	0		155.521	139.969	139.969	116.454	113.743	109.677	116.454	97.9781	81.5177	79.6203	76.774	81.5177		139.969	2.3277	5.81926	0	BioE_COM-L	0	116.454	23.5147	16.8
IT	ITF1	ITF14	Chieti	0	10	0	16.8	16.8	4.50898	16.8	4.07956	16.8	1.27698	30	0	0		235.768	212.191	212.191	176.543	168.583	169.341	174.289	148.534	123.58	118.008	118.539	122.002		212.191	4.50898	4.07956	1.27698	BioE_COM-L	1.27698	174.289	37.9026	17.8624
IT	ITF2	ITF21	Isernia	3.21229	10	0	14.2857	14.2857	1.95531	14.2857	6.14525	14.2857	44.6927	30	0	0		62.8884	54.7814	54.7814	46.9555	46.0374	44.07	25.9698	38.347	32.8689	32.2262	30.849	18.1789		54.7814	1.95531	6.14525	44.6927	BioE_COM-S	1.95531	46.0374	8.74404	15.9617
IT	ITF2	ITF22	Campobasso	0	10	0	14.2857	14.2857	17.373	14.2857	35.8916	14.2857	19.3204	30	0	0		186.641	167.977	167.977	143.98	118.966	92.3035	116.163	117.584	100.786	83.2765	64.6124	81.3139		167.977	17.373	35.8916	19.3204	BioE_COM-S	17.373	118.966	49.0104	29.1769
IT	ITF3	ITF31	Caserta	1.26258	10	0	18.8912	18.8912	10.2104	18.8912	16.3586	18.8912	3.56816	30	0	0		5009.8	4451.89	4451.89	3610.88	3242.19	3020.19	3482.03	3116.32	2527.61	2269.53	2114.13	2437.42		4451.89	10.2104	16.3586	3.56816	BioE_COM-L	3.56816	3482.03	969.856	21.7853
IT	ITF3	ITF32	Benevento	3.69336	10	0	18.8912	18.8912	11.4881	18.8912	28.5806	18.8912	10.3285	30	0	0		323.81	280.665	280.665	227.644	201.492	162.582	204.132	196.466	159.351	141.045	113.807	142.892		280.665	11.4881	28.5806	10.3285	BioE_COM-L	10.3285	204.132	76.5333	27.2685
IT	ITF3	ITF33	Napoli	1.86722	10	0	18.8912	18.8912	10.6698	18.8912	26.3189	18.8912	17.2792	30	0	0		3979.02	3514.25	3514.25	2850.37	2546.24	2100.18	2357.85	2459.97	1995.26	1782.37	1470.13	1650.49		3514.25	10.6698	26.3189	17.2792	BioE_COM-S	10.6698	2546.24	968.012	27.5453
IT	ITF3	ITF34	Avellino	2.75925	10	0	18.8912	18.8912	15.6307	18.8912	20.1183	18.8912	10.1425	30	0	0		9417.62	8241.99	8241.99	6684.98	5640.07	5340.08	6006.95	5769.39	4679.48	3948.05	3738.05	4204.87		8241.99	15.6307	20.1183	10.1425	BioE_COM-L	10.1425	6006.95	2235.03	27.1176
IT	ITF3	ITF35	Salerno	3.79151	10	0	18.8912	18.8912	9.426	18.8912	17.7559	18.8912	10.2785	30	0	0		6027.52	5219.09	5219.09	4233.14	3834.13	3481.51	3798.04	3653.36	2963.2	2683.89	2437.06	2658.63		5219.09	9.426	17.7559	10.2785	BioE_COM-S	9.426	3834.13	1384.96	26.5365
IT	ITF4	ITF43	Taranto	0.279406	10	0	16.7763	16.7763	1.71051	16.7763	1.88088	16.7763	0	30	0	0		351.082	315.091	315.091	262.231	257.745	257.298	262.231	220.564	183.561	180.422	180.109	183.561		315.091	1.71051	1.88088	0	BioE_COM-L	0	262.231	52.8607	16.7763
IT	ITF4	ITF44	Brindisi	0.0466466	10	0	16.7763	16.7763	0.523479	16.7763	0.55976	16.7763	0	30	0	0		1548.26	1392.79	1392.79	1159.13	1153.06	1152.64	1159.13	974.95	811.389	807.142	806.848	811.389		1392.79	0.523479	0.55976	0	BioE_COM-L	0	1159.13	233.658	16.7763
IT	ITF4	ITF45	Lecce	0.748363	10	0	16.7763	16.7763	0.22217	16.7763	0.00389772	16.7763	0	30	0	0		66.608	59.4986	59.4986	49.5169	49.4069	49.515	49.5169	41.649	34.6618	34.5848	34.6605	34.6618		59.4986	0.22217	0.00389772	0	BioE_COM-L	0	49.5169	9.98167	16.7763
IT	ITF4	ITF46	Foggia	1.33333	10	0	16.7763	16.7763	8.51596	16.7763	23.3359	16.7763	18.1814	30	0	0		683.787	607.203	607.203	505.337	462.302	387.412	413.46	425.042	353.736	323.612	271.188	289.422		607.203	8.51596	23.3359	18.1814	BioE_COM-S	8.51596	462.302	144.901	23.8636
IT	ITF4	ITF47	Bari	0.0293036	10	0	16.7763	16.7763	0.687006	16.7763	1.70612	16.7763	1.40006	30	0	0		6889.76	6198.97	6198.97	5159.01	5123.57	5070.99	5086.78	4339.28	3611.31	3586.5	3549.69	3560.75		6198.97	0.687006	1.70612	1.40006	BioE_COM-S	0.687006	5123.57	1075.4	17.3481
IT	ITF4	ITF48	Barletta-Andria-Trani	0.0974002	10	0	16.7763	16.7763	0.869109	16.7763	1.7532	16.7763	1.0714	30	0	0		571.334	513.7	513.7	427.52	423.804	420.024	422.939	359.59	299.264	296.663	294.017	296.057		513.7	0.869109	1.7532	1.0714	BioE_COM-S	0.869109	423.804	89.8955	17.4996
IT	ITF5	ITF51	Potenza	0.79976	10	0	7.10059	7.10059	39.888	7.10059	65.1105	7.10059	40.2579	30	0	0		1094.71	977.364	977.364	907.965	545.796	316.785	542.437	684.155	635.576	382.057	221.749	379.706		977.364	39.888	65.1105	40.2579	BioE_COM-S	39.888	545.796	431.568	44.1563
IT	ITF5	ITF52	Matera	0.104778	10	0	7.10059	7.10059	12.8877	7.10059	19.4363	7.10059	6.20285	30	0	0		104.231	93.7096	93.7096	87.0556	75.8362	70.1352	81.6557	65.5967	60.9389	53.0853	49.0947	57.159		93.7096	12.8877	19.4363	6.20285	BioE_COM-L	6.20285	81.6557	12.0539	12.863
IT	ITF6	ITF61	Cosenza	0.92792	10	0	11.6301	11.6301	6.42088	11.6301	11.5866	11.6301	7.0464	30	0	0		3661.11	3264.42	3264.42	2884.76	2699.54	2550.52	2681.49	2285.09	2019.33	1889.68	1785.36	1877.04		3264.42	6.42088	11.5866	7.0464	BioE_COM-S	6.42088	2699.54	564.883	17.3042
IT	ITF6	ITF62	Crotone	0.118561	10	0	11.6301	11.6301	5.33527	11.6301	7.48255	11.6301	3.12212	30	0	0		329.879	296.539	296.539	262.051	248.07	242.443	253.87	207.577	183.436	173.649	169.71	177.709		296.539	5.33527	7.48255	3.12212	BioE_COM-L	3.12212	253.87	42.6694	14.3891
IT	ITF6	ITF63	Catanzaro	1.25781	10	0	11.6301	11.6301	2.8637	11.6301	2.65802	11.6301	0.229412	30	0	0		2310.39	2053.2	2053.2	1814.41	1762.45	1766.18	1810.24	1437.24	1270.08	1233.71	1236.33	1267.17		2053.2	2.8637	2.65802	0.229412	BioE_COM-L	0.229412	1810.24	242.952	11.8329
IT	ITF6	ITF64	Vibo Valentia	1.32953	10	0	11.6301	11.6301	1.66192	11.6301	4.0994	11.6301	0	30	0	0		127.421	113.154	113.154	99.9945	98.3326	95.8953	99.9945	79.2081	69.9961	68.8328	67.1267	69.9961		113.154	1.66192	4.0994	0	BioE_COM-L	0	99.9945	13.16	11.6301
IT	ITF6	ITF65	Reggio di Calabria	1.80523	10	0	11.6301	11.6301	2.44141	11.6301	5.48638	11.6301	3.47996	30	0	0		439.467	388.38	388.38	343.211	334.832	324.381	331.267	271.866	240.248	234.382	227.067	231.887		388.38	2.44141	5.48638	3.47996	BioE_COM-S	2.44141	334.832	53.5482	13.7876
IT	ITG1	ITG11	Trapani	0.726864	10	0	12.9545	12.9545	0.610046	12.9545	3.0459	12.9545	3.39203	30	0	0		117.921	105.358	105.358	91.7092	91.1497	88.9158	88.5984	73.7505	64.1964	63.8048	62.2411	62.0189		105.358	0.610046	3.0459	3.39203	BioE_COM-S	0.610046	91.1497	14.2081	13.4856
IT	ITG1	ITG12	Palermo	4.10254	10	0	12.9545	12.9545	17.1458	12.9545	33.5842	12.9545	9.92531	30	0	0		662.554	571.835	571.835	497.756	412.412	330.589	448.352	400.284	348.429	288.689	231.412	313.847		571.835	17.1458	33.5842	9.92531	BioE_COM-L	9.92531	448.352	123.482	21.5941
IT	ITG1	ITG13	Messina	7.413	10	0	12.9545	12.9545	24.3451	12.9545	35.6534	12.9545	35.2306	30	0	0		6217.04	5180.55	5180.55	4509.44	3411.61	2901.67	2920.73	3626.39	3156.61	2388.13	2031.17	2044.51		5180.55	24.3451	35.6534	35.2306	BioE_COM-S	24.3451	3411.61	1768.95	34.1459
IT	ITG1	ITG14	Agrigento	0.814321	10	0	12.9545	12.9545	6.72993	12.9545	13.231	12.9545	2.69197	30	0	0		3638.72	3248.18	3248.18	2827.39	2637.11	2453.3	2751.28	2273.72	1979.17	1845.98	1717.31	1925.89		3248.18	6.72993	13.231	2.69197	BioE_COM-L	2.69197	2751.28	496.899	15.2978
IT	ITG1	ITG15	Caltanissetta	0	10	0	12.9545	12.9545	28.9975	12.9545	67.9514	12.9545	24.7993	30	0	0		2672.88	2405.6	2405.6	2093.96	1486.77	671.086	1574.67	1683.92	1465.77	1040.74	469.76	1102.27		2405.6	28.9975	67.9514	24.7993	BioE_COM-L	24.7993	1574.67	830.921	34.5412
IT	ITG1	ITG16	Enna	0	10	0	12.9545	12.9545	56.9181	12.9545	65.6368	12.9545	57.2782	30	0	0		2189.97	1970.97	1970.97	1715.64	739.13	589.548	732.952	1379.68	1200.95	517.391	412.684	513.066		1970.97	56.9181	65.6368	57.2782	BioE_COM-S	56.9181	739.13	1231.84	62.4992
IT	ITG1	ITG17	Catania	0.0502849	10	0	12.9545	12.9545	60.0682	12.9545	80.0816	12.9545	51.9835	30	0	0		2175.48	1956.95	1956.95	1703.43	680.212	339.297	817.93	1369.86	1192.4	476.149	237.508	572.551		1956.95	60.0682	80.0816	51.9835	BioE_COM-L	51.9835	817.93	1139.02	58.2038
IT	ITG1	ITG18	Ragusa	0.223104	10	0	12.9545	12.9545	4.79673	12.9545	13.9688	12.9545	2.86316	30	0	0		2010.28	1805.21	1805.21	1571.36	1495.98	1351.86	1526.37	1263.65	1099.95	1047.19	946.3	1068.46		1805.21	4.79673	13.9688	2.86316	BioE_COM-L	2.86316	1526.37	278.848	15.4468
IT	ITG1	ITG19	Siracusa	0.143102	10	0	12.9545	12.9545	36.7869	12.9545	69.1853	12.9545	41.7573	30	0	0		2807.65	2523.27	2523.27	2196.39	1388.41	676.812	1279.24	1766.29	1537.47	971.886	473.769	895.467		2523.27	36.7869	69.1853	41.7573	BioE_COM-S	36.7869	1388.41	1134.86	44.9758
IT	ITG2	ITG25	Sassari	0.0901984	10	0	8.77193	8.77193	4.78052	8.77193	9.65123	8.77193	17.8292	30	0	0		30.3891	27.3255	27.3255	24.9285	23.7368	22.5226	20.484	19.1279	17.45	16.6158	15.7658	14.3388		27.3255	4.78052	9.65123	17.8292	BioE_COM-S	4.78052	23.7368	3.58869	13.1331
IT	ITG2	ITG26	Nuoro	1.55239	10	0	8.77193	8.77193	58.6028	8.77193	100	8.77193	100	30	0	0		472.015	418.218	418.218	381.532	157.944	0	0	292.753	267.073	110.561	0	0		418.218	58.6028	100	100	BioE_COM-S	58.6028	157.944	260.275	62.2342
IT	ITG2	ITG27	Cagliari	0	10	0	8.77193	8.77193	37.8788	8.77193	95.0413	8.77193	99.449	30	0	0		320.55	288.495	288.495	263.188	163.496	13.0507	1.45007	201.947	184.232	114.447	9.13547	1.01505		288.495	37.8788	95.0413	99.449	BioE_COM-S	37.8788	163.496	124.999	43.328
IT	ITG2	ITG28	Oristano	0.218579	10	0	8.77193	8.77193	34.0984	8.77193	63.2787	8.77193	99.2896	30	0	0		165.075	148.243	148.243	135.239	89.1248	49.6616	0.960715	103.77	94.6674	62.3874	34.7631	0.672501		148.243	34.0984	63.2787	99.2896	BioE_COM-S	34.0984	89.1248	59.1181	39.8792
IT	ITG2	ITG29	Olbia-Tempio	0	10	0	8.77193	8.77193	53.0806	8.77193	100	8.77193	100	30	0	0		11.9443	10.7499	10.7499	9.80694	4.60136	0	0	7.52494	6.86486	3.22095	0	0		10.7499	53.0806	100	100	BioE_COM-S	53.0806	4.60136	6.14855	57.1963
IT	ITG2	ITG2A	Ogliastra	1.81818	10	0	8.77193	8.77193	83.2727	8.77193	100	8.77193	100	30	0	0		115.362	101.938	101.938	92.9957	15.5557	0	0	71.3563	65.097	10.889	0	0		101.938	83.2727	100	100	BioE_COM-S	83.2727	15.5557	86.382	84.74
IT	ITG2	ITG2B	Medio Campidano	0	10	0	8.77193	8.77193	55.4463	8.77193	95.3101	8.77193	100	30	0	0		215.606	194.045	194.045	177.024	78.8706	8.30217	0	135.832	123.917	55.2095	5.81152	0		194.045	55.4463	95.3101	100	BioE_COM-S	55.4463	78.8706	115.175	59.3545
IT	ITG2	ITG2C	Carbonia-Iglesias	0.980392	10	0	8.77193	8.77193	16.1765	8.77193	46.5686	8.77193	100	30	0	0		28.0983	25.0406	25.0406	22.844	19.1487	12.2059	0	17.5284	15.9908	13.4041	8.54411	0		25.0406	16.1765	46.5686	100	BioE_COM-S	16.1765	19.1487	5.8919	23.5294
IT	ITH1	ITH10	Bolzano-Bozen	18.7184	10	0	7.69231	7.69231	2.60764	7.69231	5.21528	7.69231	9.82414	30	0	0		71.5186	52.3183	52.3183	48.2938	47.0345	45.7751	43.5494	36.6228	33.8057	32.9241	32.0426	30.4845		52.3183	2.60764	5.21528	9.82414	BioE_COM-S	2.60764	47.0345	5.28381	10.0994
IT	ITH2	ITH20	Trento	17.3829	10	0	26.087	26.087	15.4273	26.087	23.0082	26.087	13.3752	30	0	0		149.345	111.046	111.046	82.0776	69.4152	63.193	71.0995	77.7323	57.4543	48.5906	44.2351	49.7697		111.046	15.4273	23.0082	13.3752	BioE_COM-L	13.3752	71.0995	39.9466	35.973
IT	ITH3	ITH31	Verona	4.30307	10	0	9.70874	9.70874	1.6706	9.70874	4.26932	9.70874	2.32872	30	0	0		348.434	300.097	300.097	270.961	266.434	259.393	264.651	210.068	189.673	186.504	181.575	185.256		300.097	1.6706	4.26932	2.32872	BioE_COM-S	1.6706	266.434	33.6623	11.2171
IT	ITH3	ITH32	Vicenza	2.26804	10	0	9.70874	9.70874	25.3608	9.70874	24.5361	9.70874	21.4433	30	0	0		95.8562	84.3139	84.3139	76.1281	56.8214	57.4492	59.8037	59.0197	53.2897	39.775	40.2145	41.8626		84.3139	25.3608	24.5361	21.4433	BioE_COM-L	21.4433	59.8037	24.5102	29.0702
IT	ITH3	ITH33	Belluno	2.26804	10	0	9.70874	9.70874	0	9.70874	0	9.70874	0	30	0	0		6.55855	5.76882	5.76882	5.20874	5.20874	5.20874	5.20874	4.03817	3.64612	3.64612	3.64612	3.64612		5.76882	0	0	0	BioE_COM-S & BioE_COM-M & BioE_COM-L	0	5.20874	0.56008	9.70874
IT	ITH3	ITH34	Treviso	0.735655	10	0	9.70874	9.70874	4.95341	9.70874	9.51447	9.70874	9.80873	30	0	0		154.22	137.777	137.777	124.401	118.238	112.564	112.198	96.4439	87.0804	82.7669	78.7951	78.5389		137.777	4.95341	9.51447	9.80873	BioE_COM-S	4.95341	118.238	19.5385	14.1812
IT	ITH3	ITH35	Venezia	0	10	0	9.70874	9.70874	21.7116	9.70874	34.7068	9.70874	21.2361	30	0	0		193.715	174.344	174.344	157.417	123.239	102.783	123.988	122.041	110.192	86.2676	71.9478	86.7914		174.344	21.7116	34.7068	21.2361	BioE_COM-L	21.2361	123.988	50.3559	28.8831
IT	ITH3	ITH36	Padova	0	10	0	9.70874	9.70874	49.0066	9.70874	81.457	9.70874	98.3444	30	0	0		59.8208	53.8387	53.8387	48.6116	24.7887	9.01408	0.804828	37.6871	34.0281	17.3521	6.30985	0.56338		53.8387	49.0066	81.457	98.3444	BioE_COM-S	49.0066	24.7887	29.05	53.9574
IT	ITH3	ITH37	Rovigo	0	10	0	9.70874	9.70874	78.0822	9.70874	100	9.70874	71.2329	30	0	0		129.885	116.897	116.897	105.548	23.1337	0	30.363	81.8277	73.8833	16.1936	0	21.2541		116.897	78.0822	100	71.2329	BioE_COM-L	71.2329	30.363	86.5338	74.0258
[truncated: 447 more rows]

## Sheet: CITRUS
CITRUS				CRT_SLOPE	CRT_LOSS	CRE_WASTE	CRE_SELF	CRE_>2ha	CRE_COM-S	CRE_>2ha	CRE_COM-M	CRE_>2ha	CRE_COM-L	CRI_COMP	CRI_>0ha	CRI_>2ha		BioTH	BioT	BioE_WASTE	BioE_SELF	BioE_COM-S	BioE_COM-M	BioE_COM-L	BioI_WASTE	BioI_SELF	BioI_COM-S	BioI_COM-M	BioI_COM-L		BioT	CRE_COM			Best economic case	CR BEST Economic	BioE_COM_BEST	GAP = BioT - BioE_COM_BEST
[truncated: 1,342 more rows]

[truncated: 3 more sheets: OLIVE, VINEYARD, TOTAL]
